# Supplementary material for: Atrial Fibrillation Induces Sarcomere Remodeling, Enhanced Sarcomere Contractility, and Loss of Atrial Identity
Source: Research Square preprint supplement (doi:10.21203/rs.3.rs-6422874/v1), 2025-04-23
Supplement: Supplementary file 1 [file 0243b54d5d19ee562c7e6c4f.xlsx]

## Sheet: EHT_Proteins
Checked	Protein FDR Confidence: Combined	Master	Accession	Description	Exp. q-value: Combined	Sum PEP Score	Coverage [%]	# Peptides	# PSMs	# Unique Peptides	# AAs	MW [kDa]	calc. pI	Score Sequest HT: Sequest HT	# Peptides (by Search Engine): Sequest HT	# Protein Pathway Groups	# Razor Peptides	Abundance Ratio: (Isometric) / (Cyclic)	Abundance Ratio Adj. P-Value: (Isometric) / (Cyclic)	Abundance Ratio Variability [%]: (Isometric) / (Cyclic)	Abundances (Grouped): Cyclic	Abundances (Grouped): Isometric	Abundances (Grouped) CV [%]: Cyclic	Abundances (Grouped) CV [%]: Isometric	Found in Sample: [S1] F1: Sample, Cyclic, 1	Found in Sample: [S2] F2: Sample, Cyclic, 2	Found in Sample: [S3] F3: Sample, Cyclic, 3	Found in Sample: [S4] F4: Sample, Cyclic, 4	Found in Sample: [S5] F5: Sample, Cyclic, 5	Found in Sample: [S6] F6: Sample, Isometric, 1	Found in Sample: [S7] F7: Sample, Isometric, 2	Found in Sample: [S8] F8: Sample, Isometric, 3	Found in Sample: [S9] F9: Sample, Isometric, 4	Found in Sample: [S11] F11: Sample, Isometric, 6	# Protein Groups	Modifications
FALSE	High	Master Protein	Q8WZ42	Titin [OS=Homo sapiens]	0	2559.09	22	424	4061	424	34350	3813.7	6.35	11091.4	424	0	0	0.829	0.888416	104.16	104.9	95.1	14.72	35.78	High	High	High	High	High	High	High	High	High	High	1
FALSE	High	Master Protein	P12883	Myosin-7 [OS=Homo sapiens]	0	1730.44	58	141	9174	45	1935	223	5.8	27400	141	0	124	1.225	0.587026	117.07	84.1	115.9	8.67	10.05	High	High	High	High	High	High	High	High	High	High	1
FALSE	High	Master Protein	P13533	Myosin-6 [OS=Homo sapiens]	0	1464.27	56	126	7572	32	1939	223.6	5.73	22005.7	126	0	1	1.175	0.676194	116.09	90.2	109.8	22.07	34.43	High	High	High	High	High	High	High	High	High	High	1
FALSE	High	Master Protein	Q14315	Filamin-C [OS=Homo sapiens]	0	544.234	47	85	1482	83	2725	290.8	5.97	3817.75	85	0	2	0.744	0.714831	111.72	91.8	108.2	40.86	32.03	High	High	High	High	High	High	High	High	High	High	1	Acetyl [N-Term]
FALSE	High	Master Protein	Q13813	Spectrin alpha chain, non-erythrocytic 1 [OS=Homo sapiens]	0	517.551	41	69	930	69	2472	284.4	5.35	2837.04	69	0	0	0.887	0.958863	103	109.4	90.6	24.83	13.63	High	High	High	High	High	High	High	High	High	High	1
FALSE	High	Master Protein	Q14204	Cytoplasmic dynein 1 heavy chain 1 [OS=Homo sapiens]	0	435.307	26	77	455	77	4646	532.1	6.4	1193.67	77	0	0	0.77	0.780902	109.24	104.8	95.2	23.03	18.27	High	High	High	High	High	High	High	High	High	High	1
FALSE	High	Master Protein	Q71U36	Tubulin alpha-1A chain [OS=Homo sapiens]	0	412.246	72	26	1612	2	451	50.1	5.06	5330.4	26	0	36	0.967	0.957271	116.12	93.2	106.8	34.22	21.87	Peak Found	High	High	High	High	High	High	High	High	High	1
FALSE	High	Master Protein	Q01082	Spectrin beta chain, non-erythrocytic 1 [OS=Homo sapiens]	0	395.112	38	59	694	59	2364	274.4	5.57	1910.22	59	0	0	0.938	0.986083	109.5	128.7	71.3	56.08	23.91	High	High	High	High	High	High	High	High	High	High	1
FALSE	High	Master Protein	Q9BQE3	Tubulin alpha-1C chain [OS=Homo sapiens]	0	363.886	67	25	1063	2	449	49.9	5.1	3186.05	25	0	1	0.692	0.568218	75.14	76.3	123.7	65.61	25.67	High	High	High	High	High	High	High	High	High	High	1
FALSE	High	Master Protein	P14618	Pyruvate kinase PKM [OS=Homo sapiens]	0	344.199	60	29	1521	29	531	57.9	7.84	4601.59	29	0	0	0.964	0.958863	105.32	106.7	93.3	71.97	11.79	High	High	High	High	High	High	High	High	High	High	1
FALSE	High	Master Protein	Q5VST9	Obscurin [OS=Homo sapiens]	0	334.055	14	60	343	60	7968	867.9	5.99	849.51	60	0	0	0.912	0.987209	101.84	117.8	82.2	50.14	33.91	High	High	High	High	High	High	High	High	High	High	1
FALSE	High	Master Protein	P06576	ATP synthase subunit beta, mitochondrial [OS=Homo sapiens]	0	324.195	64	26	1198	26	529	56.5	5.4	3338.92	26	0	0	1.13	0.74456	97.63	89.7	110.3	35.18	12.2	High	High	High	High	High	High	High	High	High	High	1
FALSE	High	Master Protein	Q14896	Myosin-binding protein C, cardiac-type [OS=Homo sapiens]	0	309.773	50	44	816	44	1274	140.7	6.65	2338.04	44	0	0	1.144	0.726153	99.17	98.1	101.9	24.6	15.5	High	High	High	High	High	High	High	High	High	High	1
FALSE	High	Master Protein	P04406	Glyceraldehyde-3-phosphate dehydrogenase [OS=Homo sapiens]	0	307.156	72	18	1138	18	335	36	8.46	3337.1	18	0	0	1.056	0.856981	109	95.2	104.8	28.81	25.86	High	High	High	High	High	High	High	High	High	High	1
FALSE	High	Master Protein	P62736	Actin, aortic smooth muscle [OS=Homo sapiens]	0	305.132	71	19	1655	2	377	42	5.39	4795.33	19	0	26	1.155	0.70738	104.7	89.7	110.3	15.99	21.14	High	High	High	High	High	High	High	High	High	High	1
FALSE	High	Master Protein	P35527	Keratin, type I cytoskeletal 9 [OS=Homo sapiens]	0	303.721	89	33	654	33	623	62	5.24	1673.86	33	0	0	0.86	0.930481	138.44	95.1	104.9	150.2	92.79	High	High	High	High	High	High	High	High	High	High	1
FALSE	High	Master Protein	P07437	Tubulin beta chain [OS=Homo sapiens]	0	294.953	71	25	1345	6	444	49.6	4.89	3831.88	25	0	26	1.258	0.53448	98.44	82	118	13.94	22.53	High	High	High	High	High	High	High	High	High	High	1
FALSE	High	Master Protein	P68133	Actin, alpha skeletal muscle [OS=Homo sapiens]	0	288.279	63	18	1406	2	377	42	5.39	3816.17	18	0	1	1.283	0.493521	98.11	73.6	126.4	52.04	31.18	High	High	High	High	High	High	High	High	High	High	1
FALSE	High	Master Protein	P68371	Tubulin beta-4B chain [OS=Homo sapiens]	0	287.605	71	24	1281	1	445	49.8	4.89	3668.82	24	0	9	0.984	0.938988	104.21	82.8	117.2	47.41	47.97	Not Found	Not Found	High	Not Found	Not Found	Not Found	Not Found	High	Not Found	Not Found	1
FALSE	High	Master Protein	P10809	60 kDa heat shock protein, mitochondrial [OS=Homo sapiens]	0	273.738	54	23	887	23	573	61	5.87	2724.45	23	0	0	0.92	0.995521	108.44	112.1	87.9	43.41	36.23	High	High	High	High	High	High	High	High	High	High	1
FALSE	High	Master Protein	P68366	Tubulin alpha-4A chain [OS=Homo sapiens]	0	272.748	50	19	1262	3	448	49.9	5.06	4421.27	19	0	0	1.51	0.284375	134.18	73.1	126.9	104.29	74.77	High	High	Peak Found	High	High	Peak Found	High	High	High	High	1
FALSE	High	Master Protein	Q00610	Clathrin heavy chain 1 [OS=Homo sapiens]	0	265.109	38	45	338	45	1675	191.5	5.69	873.93	45	0	0	0.901	0.975833	84.48	100.3	99.7	45.51	26.25	High	High	High	High	High	High	High	High	High	High	1
FALSE	High	Master Protein	P04350	Tubulin beta-4A chain [OS=Homo sapiens]	0	264.945	64	22	1249	2	444	49.6	4.88	3567.57	22	0	1	1.142	0.726517	62.65	69.5	130.5	44.15	32.85	High	Peak Found	High	Peak Found	Peak Found	High	Peak Found	High	High	High	1
FALSE	High	Master Protein	P11055	Myosin-3 [OS=Homo sapiens]	0	262.589	14	32	1345	3	1940	223.8	5.81	3510.97	32	0	0	0.656	0.806378	130.31	162.3	37.7	136.52	113.55	High	High	High	High	High	High	High	High	High	High	1
FALSE	High	Master Protein	P25705	ATP synthase subunit alpha, mitochondrial [OS=Homo sapiens]	0	258.187	59	26	1237	26	553	59.7	9.13	3341.47	26	0	0	0.94	0.98392	113.13	106	94	26.28	29.2	High	High	High	High	High	High	High	High	High	High	1
FALSE	High	Master Protein	P04264	Keratin, type II cytoskeletal 1 [OS=Homo sapiens]	0	255.584	52	34	779	29	644	66	8.12	2043.99	34	0	5	0.852	0.919844	132.16	120.9	79.1	45.07	100.64	High	High	High	High	High	High	High	High	High	High	1
FALSE	High	Master Protein	Q01813	ATP-dependent 6-phosphofructokinase, platelet type [OS=Homo sapiens]	0	250.623	57	30	782	27	784	85.5	7.55	2192.55	30	0	4	1.124	0.75487	92.4	101.9	98.1	50.75	17.5	High	High	High	High	High	High	High	High	High	High	1
FALSE	High	Master Protein	Q13885	Tubulin beta-2A chain [OS=Homo sapiens]	0	249.902	65	22	919	4	445	49.9	4.89	2409.12	22	0	0	1.133	0.738216	102.49	32.4	167.6	115.59	78.45	Peak Found	High	High	High	High	High	High	High	High	High	1
FALSE	High	Master Protein	Q09666	Neuroblast differentiation-associated protein AHNAK [OS=Homo sapiens]	0	240.946	25	54	348	54	5890	628.7	6.15	813.74	54	0	0	1.044	0.873884	114.68	119.8	80.2	95.56	84.31	High	High	High	High	High	High	High	High	High	High	1
FALSE	High	Master Protein	P35580	Myosin-10 [OS=Homo sapiens]	0	232.285	26	36	360	27	1976	228.9	5.54	899.52	36	0	1	0.835	0.897148	110.56	106.9	93.1	33.44	13.68	High	High	High	High	High	High	High	High	High	High	1
FALSE	High	Master Protein	P08133	Annexin A6 [OS=Homo sapiens]	0	228.375	45	30	775	30	673	75.8	5.6	2080.17	30	0	0	1.366	0.374108	104.4	93.6	106.4	36.68	20.2	High	High	High	High	High	High	High	High	High	High	1
FALSE	High	Master Protein	P42704	Leucine-rich PPR motif-containing protein, mitochondrial [OS=Homo sapiens]	0	226.027	42	35	225	35	1394	157.8	6.13	646.66	35	0	0	0.833	0.892772	98.75	106.7	93.3	31.25	13.39	High	High	High	High	High	High	High	High	High	High	1
FALSE	High	Master Protein	P35579	Myosin-9 [OS=Homo sapiens]	0	224.975	26	38	460	29	1960	226.4	5.6	1148.72	38	0	8	0.833	0.892772	106.6	108.8	91.2	34.75	23.15	High	High	High	High	High	High	High	High	High	High	1
FALSE	High	Master Protein	P35609	Alpha-actinin-2 [OS=Homo sapiens]	0	220.099	49	32	564	23	894	103.8	5.45	1542.39	32	0	10	0.983	0.941034	112.16	106.4	93.6	24.32	32	High	High	High	High	High	High	High	High	High	High	1
FALSE	High	Master Protein	Q9Y490	Talin-1 [OS=Homo sapiens]	0	219.61	25	37	263	31	2541	269.6	6.07	730.08	37	0	7	1.036	0.883577	105.47	96.7	103.3	53.54	30.71	High	High	High	High	High	High	High	High	High	High	1
FALSE	High	Master Protein	P13535	Myosin-8 [OS=Homo sapiens]	0	216.07	11	25	1036	1	1937	222.6	5.74	2689.1	25	0	0	1.255	0.695592	114.24	88.7	111.3	107.85		Not Found	High	Peak Found	High	High	Not Found	Peak Found	Not Found	Not Found	Not Found	1
FALSE	High	Master Protein	Q99798	Aconitate hydratase, mitochondrial [OS=Homo sapiens]	0	212.817	48	25	440	25	780	85.4	7.61	1209.72	25	0	0	1.141	0.726804	122.95	81.6	118.4	39.54	27.17	High	High	High	High	High	High	High	High	High	High	1
FALSE	High	Master Protein	P68104	Elongation factor 1-alpha 1 [OS=Homo sapiens]	0	207.201	54	16	1005	9	462	50.1	9.01	3568.64	16	0	8	0.829	0.888775	110.12	107.5	92.5	50.13	22.66	High	High	High	High	High	High	High	High	High	High	1
FALSE	High	Master Protein	P16615	Sarcoplasmic/endoplasmic reticulum calcium ATPase 2 [OS=Homo sapiens]	0	201.77	37	29	405	29	1042	114.7	5.34	985.49	29	0	0	0.97	0.955513	121.27	105.5	94.5	56.59	30.33	High	High	High	High	High	High	High	High	High	High	1
FALSE	High	Master Protein	P06744	Glucose-6-phosphate isomerase [OS=Homo sapiens]	0	200.511	58	19	373	19	558	63.1	8.32	1243.72	19	0	0	1.096	0.803413	89.31	104.5	95.5	60.34	14.12	High	High	High	High	High	High	High	High	High	High	1
TRUE	High	Master Protein	Q9UKX3	Myosin-13 [OS=Homo sapiens]	0	199.319	9	21	854	1	1938	223.5	5.68	2155.07	21	0	0	0.027	6.942e-05	133.2	194.8	5.2	106.46	80.23	Not Found	Peak Found	Peak Found	High	Peak Found	Not Found	Not Found	Not Found	Peak Found	High	1
FALSE	High	Master Protein	Q9NQC3	Reticulon-4 [OS=Homo sapiens]	0	198.117	40	26	401	26	1192	129.9	4.5	1379.82	26	0	0	0.855	0.924287	95.99	107.5	92.5	47.65	20.96	High	High	High	High	High	High	High	High	High	High	1	Acetyl [N-Term]
FALSE	High	Master Protein	Q14195	Dihydropyrimidinase-related protein 3 [OS=Homo sapiens]	0	197.742	58	19	698	16	570	61.9	6.49	1780.48	19	0	4	1.017	0.910947	105.69	100.3	99.7	33.24	22.67	High	High	High	High	High	High	High	High	High	High	1
FALSE	High	Master Protein	P06733	Alpha-enolase [OS=Homo sapiens]	0	197.096	51	17	1167	13	434	47.1	7.39	3626.29	17	0	4	1.12	0.761187	99.16	88.8	111.2	15.83	15.73	High	High	High	High	High	High	High	High	High	High	1
FALSE	High	Master Protein	P00338	L-lactate dehydrogenase A chain [OS=Homo sapiens]	0	194.221	77	23	533	20	332	36.7	8.27	1286.01	23	0	3	1.508	0.203711	123.16	84.8	115.2	64.74	65.57	High	High	High	High	High	High	High	High	High	High	1
FALSE	High	Master Protein	P18206	Vinculin [OS=Homo sapiens]	0	188.608	31	27	434	27	1134	123.7	5.66	1198.38	27	0	0	0.916	0.989952	114.35	97	103	26.69	12.53	High	High	High	High	High	High	High	High	High	High	1
FALSE	High	Master Protein	P13639	Elongation factor 2 [OS=Homo sapiens]	0	187.954	39	21	388	21	858	95.3	6.83	1111.16	21	0	0	1.228	0.584679	101.28	89.2	110.8	46.1	25.77	High	High	High	High	High	High	High	High	High	High	1
FALSE	High	Master Protein	P55072	Transitional endoplasmic reticulum ATPase [OS=Homo sapiens]	0	182.534	51	31	297	31	806	89.3	5.26	840.84	31	0	0	1.081	0.825043	93.66	87.8	112.2	64.23	20.28	High	High	High	High	High	High	High	High	High	High	1
FALSE	High	Master Protein	P07900	Heat shock protein HSP 90-alpha [OS=Homo sapiens]	0	182.455	41	20	996	12	732	84.6	5.02	2611.77	20	0	8	0.991	0.932767	116.19	106.4	93.6	18.95	27.64	High	High	High	High	High	High	High	High	High	High	1
FALSE	High	Master Protein	P12829	Myosin light chain 4 [OS=Homo sapiens]	0	174.336	70	15	791	13	197	21.6	5.03	2323.41	15	0	2	1.212	0.61308	125.51	100	100	81.66	26.13	High	High	High	High	High	High	High	High	High	High	1
FALSE	High	Master Protein	P11216	Glycogen phosphorylase, brain form [OS=Homo sapiens]	0	173.893	42	27	352	22	843	96.6	6.86	916.13	27	0	5	1.075	0.831092	114.84	105.1	94.9	35.65	38.31	High	High	High	High	High	High	High	High	High	High	1
FALSE	High	Master Protein	P08238	Heat shock protein HSP 90-beta [OS=Homo sapiens]	0	173.371	33	17	934	9	724	83.2	5.03	2440.2	17	0	0	0.772	0.785514	113.94	120	80	44.16	40.43	High	High	High	High	High	High	High	High	High	High	1
FALSE	High	Master Protein	P13645	Keratin, type I cytoskeletal 10 [OS=Homo sapiens]	0	172.296	49	24	411	21	584	58.8	5.21	1238.17	24	0	4	0.536	0.136353	129.03	151.7	48.3	72.56	84.49	High	High	High	High	High	High	High	High	High	High	1
FALSE	High	Master Protein	P38646	Stress-70 protein, mitochondrial [OS=Homo sapiens]	0	171.542	42	19	461	19	679	73.6	6.16	1325.04	19	0	0	0.782	0.806284	110.22	112	88	73.45	44.08	High	High	High	High	High	High	High	High	High	High	1
FALSE	High	Master Protein	Q16851	UTP--glucose-1-phosphate uridylyltransferase [OS=Homo sapiens]	0	170.32	42	19	385	19	508	56.9	8.15	1353.05	19	0	0	0.761	0.755542	88.45	95.4	104.6	19.96	32.65	High	High	High	High	High	High	High	High	High	High	1
FALSE	High	Master Protein	P22314	Ubiquitin-like modifier-activating enzyme 1 [OS=Homo sapiens]	0	169.805	41	26	322	26	1058	117.8	5.76	922	26	0	0	0.897	0.97082	100.53	111	89	28.64	26.51	High	High	High	High	High	High	High	High	High	High	1
FALSE	High	Master Protein	P21796	Voltage-dependent anion-selective channel protein 1 [OS=Homo sapiens]	0	168.898	75	17	1171	16	283	30.8	8.54	3754.62	17	0	1	0.721	0.661902	100.07	124.1	75.9	56.81	40.63	High	High	High	High	High	High	High	High	High	High	1
FALSE	High	Master Protein	P04075	Fructose-bisphosphate aldolase A [OS=Homo sapiens]	0	166.956	53	13	758	11	364	39.4	8.09	2289.82	13	0	2	1.039	0.88118	103.24	109	91	52.12	32.38	High	High	High	High	High	High	High	High	High	High	1
FALSE	High	Master Protein	P14625	Endoplasmin [OS=Homo sapiens]	0	165.361	43	23	451	22	803	92.4	4.84	1133.75	23	0	1	0.858	0.925469	103.19	115.2	84.8	36.25	6.29	High	High	High	High	High	High	High	High	High	High	1
FALSE	High	Master Protein	P40939	Trifunctional enzyme subunit alpha, mitochondrial [OS=Homo sapiens]	0	164.467	37	18	354	18	763	82.9	9.04	1134.98	18	0	0	1.027	0.892946	115.48	116.9	83.1	20.39	37.27	High	High	High	High	High	High	High	High	High	High	1
FALSE	High	Master Protein	Q01449	Myosin regulatory light chain 2, atrial isoform [OS=Homo sapiens]	0	164.327	75	10	499	10	175	19.4	4.88	1512.68	10	0	0	1.158	0.704469	103.46	93.8	106.2	31.93	10.41	High	High	High	High	High	High	High	High	High	High	1
FALSE	High	Master Protein	P52179	Myomesin-1 [OS=Homo sapiens]	0	159.86	31	32	366	32	1685	187.5	6.93	870.3	32	0	0	0.712	0.63449	106.89	106.3	93.7	77.98	18.25	High	High	High	High	High	High	High	High	High	High	1
FALSE	High	Master Protein	O75112	LIM domain-binding protein 3 [OS=Homo sapiens]	0	159.022	42	18	575	18	727	77.1	8.13	1419.26	18	0	0	1.303	0.464139	110.02	109.2	90.8	29.79	35.93	High	High	High	High	High	High	High	High	High	High	1
FALSE	High	Master Protein	O75083	WD repeat-containing protein 1 [OS=Homo sapiens]	0	157.387	55	17	364	17	606	66.2	6.65	921.37	17	0	0	0.745	0.718292	97.79	103.2	96.8	50.08	22.38	High	High	High	High	High	High	High	High	High	High	1
FALSE	High	Master Protein	Q13509	Tubulin beta-3 chain [OS=Homo sapiens]	0	155.23	45	18	732	2	450	50.4	4.93	1786.75	18	0	2	1.142	0.742362	117.71	77.9	122.1	74.63	98.67	Not Found	High	High	High	High	Not Found	High	High	High	High	1
FALSE	High	Master Protein	P00558	Phosphoglycerate kinase 1 [OS=Homo sapiens]	0	152.329	48	14	498	14	417	44.6	8.1	1314.68	14	0	0	1.976	0.0185021	118.48	60.9	139.1	54.47	50.12	High	High	High	High	High	High	High	High	High	High	1
FALSE	High	Master Protein	P07195	L-lactate dehydrogenase B chain [OS=Homo sapiens]	0	150.479	57	16	585	13	334	36.6	6.05	1553.14	16	0	0	0.719	0.657582	100.71	101.6	98.4	13.95	18.42	High	High	High	High	High	High	High	High	High	High	1
FALSE	High	Master Protein	Q9BUF5	Tubulin beta-6 chain [OS=Homo sapiens]	0	148.367	61	18	308	9	446	49.8	4.88	873.54	18	0	0	1.031	0.888775	105.21	98.9	101.1	14.55	30.71	High	High	High	High	High	High	High	High	High	High	1
FALSE	High	Master Protein	P19367	Hexokinase-1 [OS=Homo sapiens]	0	148.026	41	27	553	25	917	102.4	6.8	1464.67	27	0	2	1.149	0.716047	95.05	100.2	99.8	26.79	19.24	High	High	High	High	High	High	High	High	High	High	1	Acetyl [N-Term]
FALSE	High	Master Protein	P15311	Ezrin [OS=Homo sapiens]	0	143.146	38	19	708	15	586	69.4	6.27	1781.18	19	0	5	1.09	0.814417	88.75	104.8	95.2	60.78	28.34	High	High	High	High	High	High	High	High	High	High	1
FALSE	High	Master Protein	P49327	Fatty acid synthase [OS=Homo sapiens]	0	141.823	21	29	200	29	2511	273.3	6.44	452.9	29	0	0	0.784	0.814129	93.41	88.4	111.6	62	65.79	High	High	High	High	High	High	High	High	High	High	1
FALSE	High	Master Protein	Q8IWX7	Protein unc-45 homolog B [OS=Homo sapiens]	0	140.152	26	20	180	20	931	103.7	7.81	476.99	20	0	0	0.793	0.827761	99.89	104.8	95.2	26.88	17.35	High	High	High	High	High	High	High	High	High	High	1
FALSE	High	Master Protein	P60709	Actin, cytoplasmic 1 [OS=Homo sapiens]	0	139.694	52	14	685	5	375	41.7	5.48	1700.86	14	0	0	0.901	0.975833	108.21	98.5	101.5	7.59	38.8	High	High	High	High	High	High	High	High	High	High	1
FALSE	High	Master Protein	P12814	Alpha-actinin-1 [OS=Homo sapiens]	0	139.546	32	20	227	10	892	103	5.41	604.84	20	0	4	1.355	0.389229	91.89	67.4	132.6	49.9	22.39	High	High	High	High	High	High	High	High	High	High	1
FALSE	High	Master Protein	Q05639	Elongation factor 1-alpha 2 [OS=Homo sapiens]	0	139.019	46	13	703	6	463	50.4	9.03	2574.89	13	0	0	1.586	0.142207	104.19	101.1	98.9	59.5	35.79	High	High	High	High	High	High	High	High	High	High	1
FALSE	High	Master Protein	P12277	Creatine kinase B-type [OS=Homo sapiens]	0	137.198	56	14	449	14	381	42.6	5.59	1255.56	14	0	0	0.978	0.94575	100.94	99.6	100.4	60.27	25.72	High	High	High	High	High	High	High	High	High	High	1
FALSE	High	Master Protein	P08237	ATP-dependent 6-phosphofructokinase, muscle type [OS=Homo sapiens]	0	136.367	36	19	325	17	780	85.1	7.99	686.09	19	0	0	1.001	0.923486	101.03	100.6	99.4	17.34	37.37	High	High	High	High	High	High	High	High	High	High	1
FALSE	High	Master Protein	P00505	Aspartate aminotransferase, mitochondrial [OS=Homo sapiens]	0	134.474	45	14	212	14	430	47.5	9.01	630.96	14	0	0	1.332	0.423676	99.84	90.7	109.3	55.51	8.25	High	High	High	High	High	High	High	High	High	High	1
FALSE	High	Master Protein	P21980	Protein-glutamine gamma-glutamyltransferase 2 [OS=Homo sapiens]	0	132.74	42	16	234	16	687	77.3	5.22	742.89	16	0	0	0.709	0.621478	102.95	128.7	71.3	35.89	46.86	High	High	High	High	High	High	High	High	High	High	1
FALSE	High	Master Protein	Q92614	Unconventional myosin-XVIIIa [OS=Homo sapiens]	0	132.203	19	24	189	24	2054	233	6.3	601.7	24	0	0	0.988	0.93608	95.45	88.6	111.4	30.12	16.18	High	High	High	High	High	High	High	High	High	High	1
FALSE	High	Master Protein	P35222	Catenin beta-1 [OS=Homo sapiens]	0	131.739	42	19	284	14	781	85.4	5.86	726.67	19	0	6	1.38	0.353296	112.34	92.9	107.1	26.02	42.26	High	High	High	High	High	High	High	High	High	High	1
FALSE	High	Master Protein	P35221	Catenin alpha-1 [OS=Homo sapiens]	0	128.969	39	21	146	17	906	100	6.29	380.27	21	0	5	0.927	0.996579	107.29	111.5	88.5	28.74	42.65	High	High	High	High	High	High	High	High	High	High	1
FALSE	High	Master Protein	P11142	Heat shock cognate 71 kDa protein [OS=Homo sapiens]	0	127.801	40	19	499	16	646	70.9	5.52	1482.53	19	0	1	1.565	0.156444	112.18	102.7	97.3	61.26	45.92	High	High	High	High	High	High	High	High	High	High	1
FALSE	High	Master Protein	P06732	Creatine kinase M-type [OS=Homo sapiens]	0	126.941	53	12	389	12	381	43.1	7.25	1172.53	12	0	0	1.258	0.53448	92.66	89.6	110.4	51.29	20.92	High	High	High	High	High	High	High	High	High	High	1
FALSE	High	Master Protein	P13010	X-ray repair cross-complementing protein 5 [OS=Homo sapiens]	0	126.58	49	18	166	18	732	82.7	5.81	485.07	18	0	0	0.803	0.844692	117.97	104.5	95.5	39	23.16	High	High	High	High	High	High	High	High	High	High	1
FALSE	High	Master Protein	P11021	Endoplasmic reticulum chaperone BiP [OS=Homo sapiens]	0	126.395	34	19	339	17	654	72.3	5.16	909.26	19	0	2	1	0.924788	126.41	85.7	114.3	41.47	69.57	High	High	High	High	High	High	High	High	High	High	1
FALSE	High	Master Protein	P35908	Keratin, type II cytoskeletal 2 epidermal [OS=Homo sapiens]	0	125.921	40	24	314	16	639	65.4	8	729.55	24	0	4	0.689	0.560429	131.68	148.1	51.9	41.83	98.54	High	High	High	High	High	High	High	High	High	High	1
FALSE	High	Master Protein	Q9Y4G6	Talin-2 [OS=Homo sapiens]	0	125.21	18	27	74	21	2542	271.4	5.57	202	27	0	0	0.987	0.914215	106.05	96	104	34.72	33.72	High	High	High	High	High	High	High	High	High	High	1
FALSE	High	Master Protein	P35573	Glycogen debranching enzyme [OS=Homo sapiens]	0	124.609	25	21	120	21	1532	174.7	6.76	313.08	21	0	0	0.905	0.979785	96.7	126.9	73.1	22.89	46.67	High	High	High	High	High	High	High	High	High	High	1
FALSE	High	Master Protein	P17174	Aspartate aminotransferase, cytoplasmic [OS=Homo sapiens]	0	124.385	55	14	237	14	413	46.2	7.01	781.53	14	0	0	1.053	0.861978	93.96	101.2	98.8	34.29	20.74	High	High	High	High	High	High	High	High	High	High	1
FALSE	High	Master Protein	Q08211	ATP-dependent RNA helicase A [OS=Homo sapiens]	0	124.294	24	20	127	20	1270	140.9	6.84	315.24	20	0	0	0.94	0.983638	90.38	98.1	101.9	79.28	29.02	Peak Found	High	High	High	High	High	High	High	High	High	1
FALSE	High	Master Protein	P27797	Calreticulin [OS=Homo sapiens]	0	122.15	52	14	462	14	417	48.1	4.44	1403.19	14	0	0	0.83	0.889396	98.15	100.6	99.4	26.82	36.8	High	High	High	High	High	High	High	High	High	High	1
FALSE	High	Master Protein	P40926	Malate dehydrogenase, mitochondrial [OS=Homo sapiens]	0	120.607	53	14	403	14	338	35.5	8.68	1108.06	14	0	0	1.565	0.155987	117.92	68.9	131.1	62.04	32.82	High	High	High	High	High	High	High	High	High	High	1
FALSE	High	Master Protein	P10916	Myosin regulatory light chain 2, ventricular/cardiac muscle isoform [OS=Homo sapiens]	0	118.894	71	11	436	11	166	18.8	5	1329.28	11	0	0	0.816	0.867706	107.04	127.7	72.3	43.3	48.33	High	High	High	High	High	High	High	High	High	High	1
FALSE	High	Master Protein	Q16891	MICOS complex subunit MIC60 [OS=Homo sapiens]	0	115.18	27	14	242	14	758	83.6	6.48	719.29	14	0	0	0.612	0.33065	103.6	112.1	87.9	46.47	89.13	High	High	High	High	High	High	High	High	High	High	1
FALSE	High	Master Protein	P31930	Cytochrome b-c1 complex subunit 1, mitochondrial [OS=Homo sapiens]	0	114.956	48	14	321	14	480	52.6	6.37	996.95	14	0	0	0.8	0.839899	105.68	105.1	94.9	27.74	23.57	High	High	High	High	High	High	High	High	High	High	1
FALSE	High	Master Protein	P62140	Serine/threonine-protein phosphatase PP1-beta catalytic subunit [OS=Homo sapiens]	0	114.725	69	15	274	7	327	37.2	6.19	743.7	15	0	9	1.194	0.64785	99.75	83.1	116.9	59	27.96	High	High	High	High	High	High	High	High	High	High	1
FALSE	High	Master Protein	P05023	Sodium/potassium-transporting ATPase subunit alpha-1 [OS=Homo sapiens]	0	113.685	25	16	208	11	1023	112.8	5.49	495.89	16	0	5	0.8	0.839963	118.9	111.6	88.4	45.41	26	High	High	High	High	High	High	High	High	High	High	1
FALSE	High	Master Protein	P50395	Rab GDP dissociation inhibitor beta [OS=Homo sapiens]	0	113.067	46	15	142	10	445	50.6	6.47	425.38	15	0	5	0.902	0.976575	102.95	99.8	100.2	28.49	30.77	Peak Found	High	High	High	High	High	High	High	High	High	1
FALSE	High	Master Protein	P48643	T-complex protein 1 subunit epsilon [OS=Homo sapiens]	0	112.68	46	16	207	16	541	59.6	5.66	660.28	16	0	0	0.95	0.975833	98.29	100.7	99.3	25.87	37.24	High	High	High	High	High	High	High	High	High	High	1
FALSE	High	Master Protein	Q86VP6	Cullin-associated NEDD8-dissociated protein 1 [OS=Homo sapiens]	0	112.462	26	18	116	18	1230	136.3	5.78	308.61	18	0	0	0.872	0.944462	76.76	114.3	85.7	42.8	15.98	High	High	High	High	High	High	High	High	High	High	1
FALSE	High	Master Protein	P32119	Peroxiredoxin-2 [OS=Homo sapiens]	0	112.43	75	14	338	13	198	21.9	5.97	972.8	14	0	1	1.395	0.333648	103.24	93.1	106.9	38.03	5.6	High	High	High	High	High	High	High	High	High	High	1
FALSE	High	Master Protein	P78371	T-complex protein 1 subunit beta [OS=Homo sapiens]	0	112.386	47	16	169	16	535	57.5	6.46	522.37	16	0	0	0.831	0.891801	96.92	86.3	113.7	57.72	38.03	Peak Found	High	High	High	High	High	High	High	High	High	1
FALSE	High	Master Protein	P13611	Versican core protein [OS=Homo sapiens]	0	111.955	5	12	248	12	3396	372.6	4.51	723.83	12	0	0	0.923	0.9973	114.24	100.1	99.9	52.2	49.84	High	High	High	High	High	High	High	High	High	High	1
FALSE	High	Master Protein	P36957	Dihydrolipoyllysine-residue succinyltransferase component of 2-oxoglutarate dehydrogenase complex, mitochondrial [OS=Homo sapiens]	0	111.727	39	13	185	13	453	48.7	8.95	493.04	13	0	0	0.957	0.966267	125.07	109.5	90.5	58.12	50.05	High	High	High	High	High	High	High	High	High	High	1
FALSE	High	Master Protein	P55209	Nucleosome assembly protein 1-like 1 [OS=Homo sapiens]	0	110.615	43	9	243	9	391	45.3	4.46	773.96	9	0	0	0.965	0.957401	100.78	107.1	92.9	53.13	44.92	High	High	High	High	High	High	High	High	High	High	1
FALSE	High	Master Protein	P48147	Prolyl endopeptidase [OS=Homo sapiens]	0	108.92	38	18	248	18	710	80.6	5.86	656.6	18	0	0	0.86	0.929723	92.79	103	97	20.11	37.49	High	High	High	High	High	High	High	High	High	High	1
FALSE	High	Master Protein	P06396	Gelsolin [OS=Homo sapiens]	0	108.669	38	13	187	13	782	85.6	6.28	631.96	13	0	0	0.853	0.921271	130.84	117.5	82.5	49.25	48.7	High	High	High	High	High	High	High	High	High	High	1
FALSE	High	Master Protein	Q14697	Neutral alpha-glucosidase AB [OS=Homo sapiens]	0	108.437	24	13	183	13	944	106.8	6.14	518.1	13	0	0	0.84	0.907751	67.42	108.8	91.2	27.53	27.21	High	High	High	High	High	High	High	High	High	High	1
FALSE	High	Master Protein	P49748	Very long-chain specific acyl-CoA dehydrogenase, mitochondrial [OS=Homo sapiens]	0	108.13	33	14	143	14	655	70.3	8.75	314.5	14	0	0	1.027	0.892772	109.86	113.1	86.9	20.04	47.04	High	High	High	High	High	High	High	High	High	High	1
FALSE	High	Master Protein	Q14974	Importin subunit beta-1 [OS=Homo sapiens]	0	108.128	31	15	172	15	876	97.1	4.78	469.2	15	0	0	1.151	0.713398	100.62	84.7	115.3	32.02	28.2	High	High	High	High	High	High	High	High	High	High	1
FALSE	High	Master Protein	P13929	Beta-enolase [OS=Homo sapiens]	0	107.479	33	10	803	5	434	47	7.71	2083.55	10	0	0	1.098	0.800875	90.06	102.9	97.1	55.95	42.9	High	High	High	High	High	High	High	High	High	High	1
FALSE	High	Master Protein	P04792	Heat shock protein beta-1 [OS=Homo sapiens]	0	106.976	47	9	494	9	205	22.8	6.4	1504.3	9	0	0	1.108	0.784274	121.18	124.6	75.4	25.55	52.77	High	High	High	High	High	High	High	High	High	High	1
FALSE	High	Master Protein	P60174	Triosephosphate isomerase [OS=Homo sapiens]	0	106.785	69	11	347	11	249	26.7	6.9	1063.01	11	0	0	1.414	0.30872	99.69	90.8	109.2	32.53	25.06	High	High	High	High	High	High	High	High	High	High	1
TRUE	High	Master Protein	Q16658	Fascin [OS=Homo sapiens]	0	105.938	37	13	210	13	493	54.5	7.24	577.31	13	0	0	0.477	0.0498466	98.3	124	76	30.79	34.44	High	High	High	High	High	High	High	High	High	High	1
FALSE	High	Master Protein	P63104	14-3-3 protein zeta/delta [OS=Homo sapiens]	0	105.698	47	12	411	10	245	27.7	4.79	1154.22	12	0	3	1.143	0.726517	87.54	91.8	108.2	17.72	23.92	High	High	High	High	High	High	High	High	High	High	1
FALSE	High	Master Protein	P18669	Phosphoglycerate mutase 1 [OS=Homo sapiens]	0	105.402	48	9	414	8	254	28.8	7.18	1099.34	9	0	1	0.975	0.949591	110.59	107.4	92.6	49.09	25.5	High	High	High	High	High	High	High	High	High	High	1
FALSE	High	Master Protein	O00410	Importin-5 [OS=Homo sapiens]	0	104.548	28	17	118	17	1097	123.6	4.94	349.27	17	0	0	0.825	0.882631	105.34	140.7	59.3	31.31	46.22	High	High	High	High	High	High	High	High	High	High	1
FALSE	High	Master Protein	P07814	Bifunctional glutamate/proline--tRNA ligase [OS=Homo sapiens]	0	104.405	25	19	106	19	1512	170.5	7.33	320.52	19	0	0	0.886	0.957401	93.82	96.5	103.5	41.82	19.74	High	High	High	High	High	High	High	High	High	High	1
FALSE	High	Master Protein	P26038	Moesin [OS=Homo sapiens]	0	104.286	27	13	593	8	577	67.8	6.4	1548.87	13	0	2	0.709	0.622681	109.3	107.2	92.8	49.54	44.44	Peak Found	High	High	High	High	Peak Found	High	High	High	High	1
FALSE	High	Master Protein	P08590	Myosin light chain 3 [OS=Homo sapiens]	0	104.042	56	10	510	8	195	21.9	5.1	1254.56	10	0	1	1.063	0.845412	137.09	98.8	101.2	71.75	19.67	High	High	High	High	High	High	High	High	High	High	1
FALSE	High	Master Protein	P50454	Serpin H1 [OS=Homo sapiens]	0	103.505	38	13	148	13	418	46.4	8.69	451.38	13	0	0	0.928	0.996579	93.77	95.5	104.5	36.09	32.55	High	High	High	High	High	High	High	High	High	High	1
FALSE	High	Master Protein	P00387	NADH-cytochrome b5 reductase 3 [OS=Homo sapiens]	0	103.222	55	12	257	12	301	34.2	7.59	588.22	12	0	0	0.922	0.996793	111.26	96.9	103.1	19.65	46.72	High	High	High	High	High	High	High	High	High	High	1
FALSE	High	Master Protein	P62258	14-3-3 protein epsilon [OS=Homo sapiens]	0	102.344	45	10	570	8	255	29.2	4.74	1262.88	10	0	0	1.319	0.443817	102.5	75.1	124.9	15.71	27.39	High	High	High	High	High	High	High	High	High	High	1
FALSE	High	Master Protein	P48735	Isocitrate dehydrogenase [NADP], mitochondrial [OS=Homo sapiens]	0	101.879	40	15	509	15	452	50.9	8.69	1269.94	15	0	0	1.476	0.236023	95.43	72.2	127.8	42.04	21.02	High	High	High	High	High	High	High	High	High	High	1
FALSE	High	Master Protein	Q9NSE4	Isoleucine--tRNA ligase, mitochondrial [OS=Homo sapiens]	0	101.875	31	17	139	17	1012	113.7	7.2	363.61	17	0	0	0.795	0.831092	107.36	84.9	115.1	49.8	35.38	Peak Found	High	High	High	High	High	High	High	High	High	1
FALSE	High	Master Protein	P46821	Microtubule-associated protein 1B [OS=Homo sapiens]	0	101.819	18	22	105	21	2468	270.5	4.81	226.04	22	0	1	0.812	0.861978	100.77	76.5	123.5	47.7	22.18	Peak Found	High	High	High	High	High	High	High	High	High	1
FALSE	High	Master Protein	P09104	Gamma-enolase [OS=Homo sapiens]	0	101.649	42	12	460	8	434	47.2	5.03	1501.05	12	0	1	0.965	0.957401	91.64	112.7	87.3	31.96	33.58	High	High	High	High	High	High	High	High	High	High	1
FALSE	High	Master Protein	P07954	Fumarate hydratase, mitochondrial [OS=Homo sapiens]	0	101.398	39	10	284	10	510	54.6	8.76	982.65	10	0	0	1.028	0.892772	98.96	101.1	98.9	13.59	24.56	High	High	High	High	High	High	High	High	High	High	1
FALSE	High	Master Protein	P0DMV9	Heat shock 70 kDa protein 1B [OS=Homo sapiens]	0	100.684	39	17	265	15	641	70	5.66	790.95	17	0	0	1.009	0.918254	106.1	92.1	107.9	61.34	54.85	High	High	High	High	High	High	High	High	High	High	1
FALSE	High	Master Protein	P07355	Annexin A2 [OS=Homo sapiens]	0	100.445	43	13	176	13	339	38.6	7.75	463.49	13	0	0	1.147	0.719699	106.57	102	98	56.73	30.74	High	High	High	High	High	High	High	High	High	High	1
FALSE	High	Master Protein	P31150	Rab GDP dissociation inhibitor alpha [OS=Homo sapiens]	0	100.341	50	15	68	10	447	50.6	5.14	253.56	15	0	0	1.125	0.726517	111.22	60.3	139.7	29.19	32.89	Peak Found	High	High	High	High	High	High	High	High	High	1
FALSE	High	Master Protein	P40227	T-complex protein 1 subunit zeta [OS=Homo sapiens]	0	100.235	34	13	243	13	531	58	6.68	653.24	13	0	0	0.856	0.924788	116.91	107.5	92.5	47.52	37.41	High	High	High	High	High	High	High	High	High	High	1
FALSE	High	Master Protein	Q13423	NAD(P) transhydrogenase, mitochondrial [OS=Homo sapiens]	0	99.642	21	17	105	17	1086	113.8	8.09	280.95	17	0	0	0.827	0.886891	117.66	98.1	101.9	40.25	25.78	High	High	High	High	High	High	High	High	High	High	1
FALSE	High	Master Protein	P30153	Serine/threonine-protein phosphatase 2A 65 kDa regulatory subunit A alpha isoform [OS=Homo sapiens]	0	99.616	40	13	99	13	589	65.3	5.11	321.27	13	0	0	1.187	0.660153	76.54	88.1	111.9	56.94	22.99	High	High	High	High	High	High	High	High	High	High	1
FALSE	High	Master Protein	P63316	Troponin C, slow skeletal and cardiac muscles [OS=Homo sapiens]	0	98.802	51	8	485	8	161	18.4	4.18	1514.99	8	0	0	0.676	0.524715	105.36	112.6	87.4	35.46	33.61	High	High	High	High	High	High	High	High	High	High	1
FALSE	High	Master Protein	P09651	Heterogeneous nuclear ribonucleoprotein A1 [OS=Homo sapiens]	0	98.723	37	9	396	4	372	38.7	9.13	946.06	9	0	7	1.128	0.748315	88.03	98.6	101.4	51.8	38.96	High	High	High	High	High	High	High	High	High	High	1
FALSE	High	Master Protein	O75306	NADH dehydrogenase [ubiquinone] iron-sulfur protein 2, mitochondrial [OS=Homo sapiens]	0	97.366	41	13	180	13	463	52.5	7.55	429.19	13	0	0	0.788	0.818934	108	131.1	68.9	52.81	41.47	High	High	High	High	High	High	High	High	High	High	1
FALSE	High	Master Protein	P10515	Dihydrolipoyllysine-residue acetyltransferase component of pyruvate dehydrogenase complex, mitochondrial [OS=Homo sapiens]	0	95.507	25	11	182	11	647	69	7.84	443.49	11	0	0	0.837	0.902038	75.51	112.7	87.3	31.02	34.51	High	High	High	High	High	High	High	High	High	High	1
FALSE	High	Master Protein	P55786	Puromycin-sensitive aminopeptidase [OS=Homo sapiens]	0	95.391	34	20	91	20	919	103.2	5.72	256.27	20	0	0	0.904	0.978397	109.1	88.5	111.5	54.24	38.68	High	High	High	High	High	High	High	High	High	High	1
FALSE	High	Master Protein	P41252	Isoleucine--tRNA ligase, cytoplasmic [OS=Homo sapiens]	0	94.75	23	19	118	19	1262	144.4	6.15	345.08	19	0	0	0.858	0.925504	107.21	121.6	78.4	51.28	19.98	High	High	High	High	High	High	High	High	High	High	1	Acetyl [N-Term]
FALSE	High	Master Protein	P28331	NADH-ubiquinone oxidoreductase 75 kDa subunit, mitochondrial [OS=Homo sapiens]	0	94.458	36	16	106	16	727	79.4	6.23	329.16	16	0	0	0.881	0.954709	111.9	100.6	99.4	22.67	50.7	High	High	High	High	High	High	High	High	High	High	1
FALSE	High	Master Protein	Q92736	Ryanodine receptor 2 [OS=Homo sapiens]	0	93.842	6	19	105	19	4967	564.2	6.07	282.03	19	0	0	0.662	0.477455	73.81	98	102	70.96	18.84	High	High	High	High	High	High	High	High	High	High	1
FALSE	High	Master Protein	P14923	Junction plakoglobin [OS=Homo sapiens]	0	93.795	35	16	226	11	745	81.7	6.14	597.32	16	0	0	1.729	0.0703493	98.84	56.9	143.1	30.27	54.91	High	High	High	High	High	High	High	High	High	High	1
FALSE	High	Master Protein	P48681	Nestin [OS=Homo sapiens]	0	93.737	16	16	168	16	1621	177.3	4.36	357.89	16	0	0	0.921	0.981508	106.48	102.9	97.1	70.12	46.04	High	High	High	High	High	High	High	High	High	High	1	Acetyl [N-Term]
FALSE	High	Master Protein	Q7Z6Z7	E3 ubiquitin-protein ligase HUWE1 [OS=Homo sapiens]	0	93.059	8	21	71	21	4374	481.6	5.22	146.27	21	0	0	1.14	0.784274	97.68	108.1	91.9	51.3	50.99	High	High	High	High	High	Peak Found	High	High	High	High	1
FALSE	High	Master Protein	P78527	DNA-dependent protein kinase catalytic subunit [OS=Homo sapiens]	0	93.031	8	21	55	21	4128	468.8	7.12	153.23	21	0	0	0.838	0.989952	93.32	101.4	98.6	53.03	69.14	High	Peak Found	High	High	High	High	High	High	High	High	1
FALSE	High	Master Protein	P15121	Aldo-keto reductase family 1 member B1 [OS=Homo sapiens]	0	92.866	51	10	298	9	316	35.8	6.98	860.38	10	0	2	0.824	0.88183	103.06	120	80	45.34	27.15	High	High	High	High	High	High	High	High	High	High	1
FALSE	High	Master Protein	O75390	Citrate synthase, mitochondrial [OS=Homo sapiens]	0	92.785	36	10	316	10	466	51.7	8.32	797.28	10	0	0	0.831	0.891334	99.98	111.5	88.5	57.86	20.12	High	High	High	High	High	High	High	High	High	High	1
FALSE	High	Master Protein	P24844	Myosin regulatory light polypeptide 9 [OS=Homo sapiens]	0	92.587	59	12	293	6	172	19.8	4.92	699.03	12	0	7	1.207	0.620739	102.68	85	115	16.87	24.88	High	High	High	High	High	High	High	High	High	High	1
FALSE	High	Master Protein	P34932	Heat shock 70 kDa protein 4 [OS=Homo sapiens]	0	92.455	24	16	119	16	840	94.3	5.19	234.9	16	0	0	0.876	0.9473	135.3	112.4	87.6	57.77	27.93	High	High	High	High	High	High	High	High	High	High	1
FALSE	High	Master Protein	Q13011	Delta(3,5)-Delta(2,4)-dienoyl-CoA isomerase, mitochondrial [OS=Homo sapiens]	0	92.3	34	7	116	7	328	35.8	8	383.54	7	0	0	0.843	0.912253	110.23	116	84	37.17	31.54	High	High	High	High	High	High	High	High	High	High	1
FALSE	High	Master Protein	P30101	Protein disulfide-isomerase A3 [OS=Homo sapiens]	0	92.208	34	10	152	9	505	56.7	6.35	438.84	10	0	0	1.414	0.30872	99.55	85.6	114.4	32.06	18.48	High	High	High	High	High	High	High	High	High	High	1
FALSE	High	Master Protein	P13489	Ribonuclease inhibitor [OS=Homo sapiens]	0	92.179	58	15	261	15	461	49.9	4.82	696	15	0	0	0.849	0.918299	103.98	106.1	93.9	59.13	34.9	High	High	High	High	High	High	High	High	High	High	1
FALSE	High	Master Protein	Q06830	Peroxiredoxin-1 [OS=Homo sapiens]	0	91.901	69	10	231	8	199	22.1	8.13	658.28	10	0	1	1.11	0.780902	98.08	94.9	105.1	53.77	35.03	High	High	High	High	High	High	High	High	High	High	1
FALSE	High	Master Protein	P55809	Succinyl-CoA:3-ketoacid coenzyme A transferase 1, mitochondrial [OS=Homo sapiens]	0	91.125	38	10	271	10	520	56.1	7.46	855.17	10	0	0	1.072	0.835494	86.51	101.9	98.1	49.05	57.66	High	High	High	High	High	High	High	High	High	High	1
FALSE	High	Master Protein	Q00839	Heterogeneous nuclear ribonucleoprotein U [OS=Homo sapiens]	0	90.734	19	10	101	10	825	90.5	6	308.97	10	0	0	0.831	0.891334	116.47	77.4	122.6	76.84	30.27	High	High	High	High	High	High	High	High	High	High	1
FALSE	High	Master Protein	P40123	Adenylyl cyclase-associated protein 2 [OS=Homo sapiens]	0	90.53	36	9	239	9	477	52.8	6.37	725.47	9	0	0	0.814	0.865507	110.33	82.2	117.8	44.52	58.8	High	High	High	High	High	High	High	High	High	High	1
FALSE	High	Master Protein	O43707	Alpha-actinin-4 [OS=Homo sapiens]	0	90.469	20	13	136	4	911	104.8	5.44	333.24	13	0	0	0.432	0.333542	113.46	147.7	52.3	44.58	92.89	Peak Found	High	High	High	High	Peak Found	High	High	High	High	1
FALSE	High	Master Protein	P50990	T-complex protein 1 subunit theta [OS=Homo sapiens]	0	90.132	27	13	288	13	548	59.6	5.6	766.43	13	0	0	1.266	0.523748	92.8	97	103	53.02	20.34	High	High	High	High	High	High	High	High	High	High	1
FALSE	High	Master Protein	P09211	Glutathione S-transferase P [OS=Homo sapiens]	0	89.092	56	9	283	9	210	23.3	5.64	731.34	9	0	0	0.949	0.975833	100.94	104.5	95.5	48.73	36.58	High	High	High	High	High	High	High	High	High	High	1
FALSE	High	Master Protein	Q9Y235	C->U-editing enzyme APOBEC-2 [OS=Homo sapiens]	0	89.066	75	11	150	11	224	25.7	4.84	401.78	11	0	0	0.984	0.938988	98.92	117.6	82.4	60.27	44.05	High	High	High	High	High	High	High	High	High	High	1
FALSE	High	Master Protein	P04843	Dolichyl-diphosphooligosaccharide--protein glycosyltransferase subunit 1 [OS=Homo sapiens]	0	88.649	34	13	204	13	607	68.5	6.38	593.73	13	0	0	0.884	0.957271	108.07	116.7	83.3	53.01	18.39	High	High	High	High	High	High	High	High	High	High	1
FALSE	High	Master Protein	P15924	Desmoplakin [OS=Homo sapiens]	0	88.624	11	19	95	19	2871	331.6	6.81	238.14	19	0	0	0.72	0.660153	106.85	166.3	33.7	78.75	46.74	Peak Found	High	High	High	High	High	High	High	High	High	1
FALSE	High	Master Protein	P13591	Neural cell adhesion molecule 1 [OS=Homo sapiens]	0	88.592	23	11	277	11	858	94.5	4.87	651.87	11	0	0	1.27	0.515007	108.61	95.8	104.2	23.76	32.61	High	High	High	High	High	High	High	High	High	High	1
FALSE	High	Master Protein	Q9UBY9	Heat shock protein beta-7 [OS=Homo sapiens]	0	87.744	61	6	317	6	170	18.6	6.52	802.75	6	0	0	0.898	0.97247	93.53	101.5	98.5	38.59	34.98	High	High	High	High	High	High	High	High	High	High	1
FALSE	High	Master Protein	O14880	Microsomal glutathione S-transferase 3 [OS=Homo sapiens]	0	87.436	53	6	203	6	152	16.5	9.38	622.38	6	0	0	0.991	0.932767	110.98	89	111	86.07	87.5	High	High	High	High	High	High	High	High	High	High	1
FALSE	High	Master Protein	P49773	Adenosine 5'-monophosphoramidase HINT1 [OS=Homo sapiens]	0	87.177	60	5	94	5	126	13.8	6.95	304.74	5	0	0	0.971	0.954709	100.09	92.5	107.5	58.03	41.45	High	High	High	High	High	High	High	High	High	High	1
FALSE	High	Master Protein	P29401	Transketolase [OS=Homo sapiens]	0	86	34	12	89	12	623	67.8	7.66	276.27	12	0	0	0.722	0.665807	109.12	86.7	113.3	60.32	48.42	High	High	High	High	High	High	High	High	High	High	1
FALSE	High	Master Protein	P09493	Tropomyosin alpha-1 chain [OS=Homo sapiens]	0	85.815	39	15	577	6	284	32.7	4.74	1055.76	15	0	11	1.933	0.0234622	120.66	65.3	134.7	50.95	53.73	High	High	High	High	High	High	High	High	High	High	1
FALSE	High	Master Protein	P26641	Elongation factor 1-gamma [OS=Homo sapiens]	0	84.64	35	12	152	12	437	50.1	6.67	405.1	12	0	0	1.066	0.842877	100.52	94.7	105.3	62.1	41.15	High	High	High	High	High	High	High	High	High	High	1
FALSE	High	Master Protein	P42765	3-ketoacyl-CoA thiolase, mitochondrial [OS=Homo sapiens]	0	84.346	57	12	204	12	397	41.9	8.09	558.07	12	0	0	0.954	0.97082	113.81	106.2	93.8	89.69	70.05	High	High	High	High	High	High	High	High	High	High	1
FALSE	High	Master Protein	P49411	Elongation factor Tu, mitochondrial [OS=Homo sapiens]	0	83.87	35	11	152	11	452	49.5	7.61	381.72	11	0	0	0.989	0.934301	117.48	90.3	109.7	65.05	31.77	High	High	High	High	High	High	High	High	High	High	1
FALSE	High	Master Protein	P10768	S-formylglutathione hydrolase [OS=Homo sapiens]	0	83.503	40	6	90	6	282	31.4	7.02	225.75	6	0	0	0.804	0.845412	90.34	103.3	96.7	38.58	35.68	High	High	High	High	High	High	High	High	High	High	1
FALSE	High	Master Protein	P23634	Plasma membrane calcium-transporting ATPase 4 [OS=Homo sapiens]	0	82.852	18	14	171	14	1241	137.8	6.6	409.11	14	0	0	1.173	0.677843	102.83	98.3	101.7	35	42.99	High	High	High	High	High	High	High	High	High	High	1
FALSE	High	Master Protein	P30041	Peroxiredoxin-6 [OS=Homo sapiens]	0	82.693	47	13	393	13	224	25	6.38	1038.96	13	0	0	1.021	0.902049	88.86	101.6	98.4	55.68	38.65	High	High	High	High	High	High	High	High	High	High	1
FALSE	High	Master Protein	Q86UP2	Kinectin [OS=Homo sapiens]	0	82.569	18	15	94	15	1357	156.2	5.64	216.11	15	0	0	0.92	0.995521	98.91	89.9	110.1	42.37	32.49	High	High	High	High	High	High	High	High	High	High	1
FALSE	High	Master Protein	Q15118	[Pyruvate dehydrogenase (acetyl-transferring)] kinase isozyme 1, mitochondrial [OS=Homo sapiens]	0	81.892	41	12	155	12	436	49.2	8.81	467.1	12	0	0	0.912	0.98734	93.54	95.7	104.3	11.26	35.69	High	High	High	High	High	High	High	High	High	High	1
FALSE	High	Master Protein	P49588	Alanine--tRNA ligase, cytoplasmic [OS=Homo sapiens]	0	81.092	22	13	124	13	968	106.7	5.53	291.63	13	0	0	0.685	0.712756	109.92	126.4	73.6	42.75	36.4	High	High	High	High	High	High	High	High	High	High	1
FALSE	High	Master Protein	Q14203	Dynactin subunit 1 [OS=Homo sapiens]	0	80.631	17	13	84	13	1278	141.6	5.81	210.04	13	0	0	0.654	0.458613	100.3	97.3	102.7	21.12	57.53	High	High	High	High	High	High	High	High	High	High	1
FALSE	High	Master Protein	Q16555	Dihydropyrimidinase-related protein 2 [OS=Homo sapiens]	0	80.507	38	13	210	10	572	62.3	6.38	527.1	13	0	0	1.007	0.889396	111	70.7	129.3	79.3	60.96	Peak Found	High	High	High	High	High	High	High	High	High	1
FALSE	High	Master Protein	Q99959	Plakophilin-2 [OS=Homo sapiens]	0	79.908	22	13	121	13	881	97.4	9.33	367.7	13	0	0	0.664	0.485852	109.09	130.2	69.8	50.16	29.28	High	High	High	High	High	High	High	High	High	High	1
TRUE	High	Master Protein	Q3ZCM7	Tubulin beta-8 chain [OS=Homo sapiens]	0	79.863	24	8	246	1	444	49.7	4.89	894.86	8	0	0	0.01	5.5167e-17		200		51.47		High	High	High	High	High	High	High	High	High	High	1
FALSE	High	Master Protein	P06748	Nucleophosmin [OS=Homo sapiens]	0	79.467	25	6	215	6	294	32.6	4.78	721.69	6	0	0	0.615	0.339974	117.94	159.2	40.8	83.91	79.14	High	High	High	High	High	High	High	High	High	High	1	Acetyl [N-Term]
FALSE	High	Master Protein	Q15365	Poly(rC)-binding protein 1 [OS=Homo sapiens]	0	79.388	51	10	211	8	356	37.5	7.09	464.29	10	0	4	1.101	0.793066	113.35	101.6	98.4	60.4	64.2	High	High	High	High	High	High	High	High	High	High	1	Acetyl [N-Term]
FALSE	High	Master Protein	Q07960	Rho GTPase-activating protein 1 [OS=Homo sapiens]	0	78.948	46	12	92	12	439	50.4	6.29	258.53	12	0	0	0.958	0.966267	81.68	113.5	86.5	74.22	40.61	High	High	High	High	High	High	High	High	High	High	1
FALSE	High	Master Protein	Q15084	Protein disulfide-isomerase A6 [OS=Homo sapiens]	0	78.9	26	9	161	9	440	48.1	5.08	408.6	9	0	0	1.014	0.912822	100.24	77.6	122.4	33.21	25.47	High	High	High	High	High	High	High	High	High	High	1
FALSE	High	Master Protein	P08758	Annexin A5 [OS=Homo sapiens]	0	78.675	55	14	185	13	320	35.9	5.05	540.58	14	0	1	1.314	0.450892	96.84	86	114	27.56	23.02	High	High	High	High	High	High	High	High	High	High	1
FALSE	High	Master Protein	O75746	Electrogenic aspartate/glutamate antiporter SLC25A12, mitochondrial [OS=Homo sapiens]	0	78.581	37	18	88	13	678	74.7	8.38	190.72	18	0	5	0.985	0.938649	92.37	109.3	90.7	37.46	20.03	High	High	High	High	High	High	High	High	High	High	1
FALSE	High	Master Protein	Q02218	2-oxoglutarate dehydrogenase complex component E1 [OS=Homo sapiens]	0	78.574	22	15	157	15	1023	115.9	6.86	358.99	15	0	0	0.912	0.987102	95.93	99.6	100.4	56.98	9.14	High	High	High	High	High	High	High	High	High	High	1
FALSE	High	Master Protein	P02511	Alpha-crystallin B chain [OS=Homo sapiens]	0	78.394	55	8	144	8	175	20.1	7.33	466.71	8	0	0	0.984	0.938988	95.97	105.9	94.1	64.25	21.13	High	High	High	High	High	High	High	High	High	High	1	Acetyl [N-Term]
FALSE	High	Master Protein	O76041	Nebulette [OS=Homo sapiens]	0	78.301	21	13	61	13	1014	116.4	7.99	200.2	13	0	0	0.544	0.151598	105.98	117.9	82.1	56.38	57.68	High	High	High	High	High	High	High	High	High	High	1
FALSE	High	Master Protein	P47755	F-actin-capping protein subunit alpha-2 [OS=Homo sapiens]	0	77.758	50	8	289	6	286	32.9	5.85	820.27	8	0	2	0.738	0.703433	113.21	102.4	97.6	61.31	16.15	High	High	High	High	High	High	High	High	High	High	1
FALSE	High	Master Protein	Q08431	Lactadherin [OS=Homo sapiens]	0	77.303	51	13	158	13	387	43.1	8.15	412.45	13	0	0	0.824	0.88118	104.49	121.8	78.2	28.88	30.76	High	High	High	High	High	High	High	High	High	High	1
FALSE	High	Master Protein	P98160	Basement membrane-specific heparan sulfate proteoglycan core protein [OS=Homo sapiens]	0	77.123	8	16	72	16	4391	468.5	6.51	138.62	16	0	0	0.724	0.817812	137.5	178.9	21.1	72.93	80.07	High	High	High	High	High	High	High	High	High	High	1
FALSE	High	Master Protein	O43852	Calumenin [OS=Homo sapiens]	0	76.609	48	10	160	10	315	37.1	4.64	372.47	10	0	0	0.78	0.804724	99.8	93.8	106.2	47.76	20.81	High	High	High	High	High	High	High	High	High	High	1
FALSE	High	Master Protein	P35241	Radixin [OS=Homo sapiens]	0	76.593	26	11	512	6	583	68.5	6.37	1311.94	11	0	0	1.463	0.249687	95.02	77.5	122.5	43.74	27.02	Peak Found	High	High	High	High	High	High	High	High	High	1
FALSE	High	Master Protein	P52789	Hexokinase-2 [OS=Homo sapiens]	0	76.344	23	15	118	13	917	102.3	6.05	318.22	15	0	0	1.523	0.161301	121.15	77.7	122.3	42.9	38.54	High	High	High	High	High	Peak Found	High	High	High	High	1	Acetyl [N-Term]
FALSE	High	Master Protein	O95831	Apoptosis-inducing factor 1, mitochondrial [OS=Homo sapiens]	0	75.581	30	12	179	12	613	66.9	8.95	477.52	12	0	0	0.821	0.87673	107.52	121.5	78.5	30.81	44.05	High	High	High	High	High	High	High	High	High	High	1
TRUE	High	Master Protein	P62136	Serine/threonine-protein phosphatase PP1-alpha catalytic subunit [OS=Homo sapiens]	0	75.575	51	12	106	1	330	37.5	6.33	269.19	12	0	0	100	5.5167e-17			200			Not Found	Not Found	Not Found	Not Found	Not Found	Not Found	Not Found	High	Not Found	Not Found	1
FALSE	High	Master Protein	Q9UI47	Catenin alpha-3 [OS=Homo sapiens]	0	75.395	24	10	66	9	895	99.7	6.16	180.06	10	0	0	1.159	0.703992	75.7	88.4	111.6	68.75	26.47	Peak Found	High	High	High	High	High	High	High	High	High	1
FALSE	High	Master Protein	P30038	Delta-1-pyrroline-5-carboxylate dehydrogenase, mitochondrial [OS=Homo sapiens]	0	75.266	35	11	120	11	563	61.7	8.07	355.55	11	0	0	1.009	0.917418	104.6	102.3	97.7	15.13	27.12	High	High	High	High	High	High	High	High	High	High	1
FALSE	High	Master Protein	P45379	Troponin T, cardiac muscle [OS=Homo sapiens]	0	74.589	34	9	441	9	298	35.9	4.97	1010.35	9	0	0	1.151	0.712756	106.05	102.6	97.4	51.93	33.92	High	High	High	High	High	High	High	High	High	High	1
FALSE	High	Master Protein	P36873	Serine/threonine-protein phosphatase PP1-gamma catalytic subunit [OS=Homo sapiens]	0	74.523	49	12	106	1	323	37	6.54	268.69	12	0	3	1.055	0.825043	56.83	96.3	103.7	44.98	29.11	Not Found	Not Found	Not Found	Not Found	Not Found	Not Found	Not Found	High	Not Found	Not Found	1
FALSE	High	Master Protein	P46782	40S ribosomal protein S5 [OS=Homo sapiens]	0	74.476	40	5	88	5	204	22.9	9.72	361.95	5	0	0	1.68	0.089689	116.45	108.1	91.9	34.06	28.83	High	High	High	High	High	High	High	High	High	High	1
FALSE	High	Master Protein	P12429	Annexin A3 [OS=Homo sapiens]	0	73.919	44	11	95	11	323	36.4	5.92	240.69	11	0	0	0.979	0.945294	124.6	115.3	84.7	58.75	73.3	Peak Found	High	High	High	High	High	High	High	High	High	1
FALSE	High	Master Protein	Q16181	Septin-7 [OS=Homo sapiens]	0	73.423	33	8	148	8	437	50.6	8.63	416.11	8	0	0	0.949	0.975833	79.98	99.1	100.9	29.96	37.11	High	High	High	High	High	High	High	High	High	High	1
FALSE	High	Master Protein	O94875	Sorbin and SH3 domain-containing protein 2 [OS=Homo sapiens]	0	73.306	14	9	389	9	1100	124	8.31	965.44	9	0	0	0.905	0.979785	87.42	114.7	85.3	57.17	42.2	High	High	High	High	High	High	High	High	High	High	1
FALSE	High	Master Protein	Q9Y277	Voltage-dependent anion-selective channel protein 3 [OS=Homo sapiens]	0	73.276	46	9	376	8	283	30.6	8.66	1047.85	9	0	0	0.647	0.439396	112.88	95.2	104.8	63.71	48.31	High	High	High	High	High	High	High	High	High	High	1
FALSE	High	Master Protein	Q04446	1,4-alpha-glucan-branching enzyme [OS=Homo sapiens]	0	73.054	27	10	59	10	702	80.4	6.32	156.1	10	0	0	1.14	0.728079	100.99	104.8	95.2	98.08	56.24	High	High	High	High	High	High	High	High	High	High	1
FALSE	High	Master Protein	Q96KP4	Cytosolic non-specific dipeptidase [OS=Homo sapiens]	0	72.982	38	12	68	12	475	52.8	5.97	189.8	12	0	0	0.958	0.966267	112.26	90.6	109.4	32.6	54.06	Peak Found	High	High	High	High	High	High	High	High	High	1
FALSE	High	Master Protein	P11177	Pyruvate dehydrogenase E1 component subunit beta, mitochondrial [OS=Homo sapiens]	0	72.794	52	10	241	10	359	39.2	6.65	768.65	10	0	0	0.79	0.823512	124.93	102.1	97.9	53.85	45.23	Peak Found	High	High	High	High	High	High	High	High	High	1
FALSE	High	Master Protein	Q702N8	Xin actin-binding repeat-containing protein 1 [OS=Homo sapiens]	0	72.512	12	12	60	12	1843	198.4	6.15	153.93	12	0	0	0.898	0.97247	127.98	89.3	110.7	56.07	64.65	High	High	High	High	High	High	High	High	High	High	1
FALSE	High	Master Protein	P50895	Basal cell adhesion molecule [OS=Homo sapiens]	0	72.333	25	8	65	8	628	67.4	5.81	170.66	8	0	0	0.902	0.976575	105.14	113.7	86.3	44.19	36.33	Peak Found	High	High	High	High	High	High	High	High	High	1
FALSE	High	Master Protein	P32418	Sodium/calcium exchanger 1 [OS=Homo sapiens]	0	72.276	19	12	160	12	973	108.5	5	458.22	12	0	0	1.476	0.236023	94.96	89.8	110.2	66.94	8.38	Peak Found	High	High	High	High	High	High	High	High	High	1
FALSE	High	Master Protein	P31943	Heterogeneous nuclear ribonucleoprotein H [OS=Homo sapiens]	0	72.166	41	10	216	7	449	49.2	6.3	561.75	10	0	3	0.823	0.88118	108.65	115.3	84.7	22.46	44.33	High	High	High	High	High	High	High	High	High	High	1
FALSE	High	Master Protein	Q9Y4W6	AFG3-like protein 2 [OS=Homo sapiens]	0	71.294	20	9	76	8	797	88.5	8.66	249.25	9	0	0	0.86	0.930723	80.22	113	87	12.94	48.25	High	High	High	High	High	High	High	High	High	High	1
FALSE	High	Master Protein	P08865	40S ribosomal protein SA [OS=Homo sapiens]	0	71.23	44	8	110	8	295	32.8	4.87	365.39	8	0	0	0.798	0.835614	100	108.1	91.9	49.1	32.83	High	High	High	High	High	High	High	High	High	High	1
FALSE	High	Master Protein	Q99832	T-complex protein 1 subunit eta [OS=Homo sapiens]	0	71.163	31	11	109	11	543	59.3	7.65	318.53	11	0	0	1.277	0.503329	127.32	81.6	118.4	34.88	48.16	High	High	High	High	High	High	High	High	High	High	1
FALSE	High	Master Protein	P45880	Voltage-dependent anion-selective channel protein 2 [OS=Homo sapiens]	0	71.138	50	10	540	10	294	31.5	7.56	1736.1	10	0	0	0.513	0.0956872	121.26	123.8	76.2	98.64	32.96	High	High	High	High	High	High	High	High	High	High	1
FALSE	High	Master Protein	P22695	Cytochrome b-c1 complex subunit 2, mitochondrial [OS=Homo sapiens]	0	70.598	26	8	146	8	453	48.4	8.63	422.26	8	0	0	0.775	0.791576	104.01	124.5	75.5	53.33	39.46	High	High	High	High	High	High	High	High	High	High	1
FALSE	High	Master Protein	P49368	T-complex protein 1 subunit gamma [OS=Homo sapiens]	0	70.579	39	12	113	12	545	60.5	6.49	297.09	12	0	0	0.966	0.957271	97.8	102.4	97.6	21.03	52.07	High	High	High	High	High	High	High	High	High	High	1
FALSE	High	Master Protein	P62937	Peptidyl-prolyl cis-trans isomerase A [OS=Homo sapiens]	0	70.422	48	7	296	7	165	18	7.81	936.22	7	0	0	0.977	0.946799	115.72	97	103	52.21	63.36	High	High	High	High	High	High	High	High	High	High	1
FALSE	High	Master Protein	P30048	Thioredoxin-dependent peroxide reductase, mitochondrial [OS=Homo sapiens]	0	69.946	45	7	171	7	256	27.7	7.78	546.88	7	0	0	0.835	0.896043	98.72	117.7	82.3	66.72	14.34	High	High	High	High	High	High	High	High	High	High	1
FALSE	High	Master Protein	P55795	Heterogeneous nuclear ribonucleoprotein H2 [OS=Homo sapiens]	0	69.726	33	8	182	6	449	49.2	6.3	502.4	8	0	0	0.783	0.810542	110.77	107.1	92.9	11.02	22.76	High	High	High	High	High	High	High	High	High	High	1
FALSE	High	Master Protein	P22626	Heterogeneous nuclear ribonucleoproteins A2/B1 [OS=Homo sapiens]	0	69.532	35	9	214	9	353	37.4	8.95	480.93	9	0	0	1.304	0.463313	98.65	96.3	103.7	62.55	31.16	High	High	High	High	High	High	High	High	High	High	1
FALSE	High	Master Protein	P63010	AP-2 complex subunit beta [OS=Homo sapiens]	0	69.086	18	15	50	11	937	104.5	5.38	133.6	15	0	4	0.623	0.454255	125.16	151.2	48.8	44.1	123.5	High	High	High	High	High	High	High	High	High	High	1
FALSE	High	Master Protein	P30084	Enoyl-CoA hydratase, mitochondrial [OS=Homo sapiens]	0	69.074	36	6	149	6	290	31.4	8.07	417.1	6	0	0	1.075	0.831092	83.9	104	96	40.21	31.93	High	High	High	High	High	High	High	High	High	High	1
FALSE	High	Master Protein	P26639	Threonine--tRNA ligase 1, cytoplasmic [OS=Homo sapiens]	0	68.919	30	14	90	14	723	83.4	6.67	224.23	14	0	0	0.626	0.375243	103.37	112.9	87.1	91.26	53.69	Peak Found	High	High	High	High	High	High	High	High	High	1
FALSE	High	Master Protein	Q13557	Calcium/calmodulin-dependent protein kinase type II subunit delta [OS=Homo sapiens]	0	68.337	32	8	90	5	499	56.3	7.25	275.54	8	0	3	1.072	0.835614	86.57	99.3	100.7	60.56	89.6	High	High	High	High	High	High	High	High	High	High	1
FALSE	High	Master Protein	P52209	6-phosphogluconate dehydrogenase, decarboxylating [OS=Homo sapiens]	0	67.98	35	11	63	11	483	53.1	7.23	196.41	11	0	0	0.916	0.989952	83.18	115.8	84.2	57.44	18.56	High	High	High	High	High	High	High	High	High	High	1
FALSE	High	Master Protein	P48047	ATP synthase subunit O, mitochondrial [OS=Homo sapiens]	0	67.695	45	7	103	7	213	23.3	9.96	330.1	7	0	0	1.137	0.734696	129.56	107.6	92.4	42.25	15.36	High	High	High	High	High	High	High	High	High	High	1
FALSE	High	Master Protein	P04040	Catalase [OS=Homo sapiens]	0	67.405	35	8	52	8	527	59.7	7.39	162.89	8	0	0	1.249	0.55494	99.43	110.1	89.9	35.93	41.82	High	High	High	High	High	High	High	High	High	High	1
FALSE	High	Master Protein	Q15124	Phosphoglucomutase-like protein 5 [OS=Homo sapiens]	0	67.359	34	12	58	12	567	62.2	7.21	177.81	12	0	0	0.81	0.856774	133.25	132	68	28.34	41.34	Not Found	High	High	High	High	High	High	High	High	High	1
FALSE	High	Master Protein	P49321	Nuclear autoantigenic sperm protein [OS=Homo sapiens]	0	67.306	29	11	138	11	788	85.2	4.3	412.34	11	0	0	1.063	0.846029	102.69	72	128	85.17	57.2	High	High	High	High	High	High	High	High	High	High	1
FALSE	High	Master Protein	P13798	Acylamino-acid-releasing enzyme [OS=Homo sapiens]	0	67.104	36	11	79	11	732	81.2	5.48	252.35	11	0	0	0.65	0.449818	100.5	116.1	83.9	75.16	21.66	Peak Found	High	High	High	High	High	High	High	High	High	1
FALSE	High	Master Protein	P80404	4-aminobutyrate aminotransferase, mitochondrial [OS=Homo sapiens]	0	67.093	31	11	73	11	500	56.4	7.96	165.49	11	0	0	0.72	0.670314	97.72	107.5	92.5	40.89	55.02	Not Found	High	High	High	High	High	High	High	High	High	1
FALSE	High	Master Protein	P00390	Glutathione reductase, mitochondrial [OS=Homo sapiens]	0	66.863	26	7	97	7	522	56.2	8.5	298.16	7	0	0	1.084	0.820493	128.12	112.5	87.5	30.89	14.17	Peak Found	High	High	High	High	High	High	High	High	High	1
FALSE	High	Master Protein	P19022	Cadherin-2 [OS=Homo sapiens]	0	66.861	21	11	182	11	906	99.7	4.81	590.93	11	0	0	1.163	0.695592	124.7	84.6	115.4	58.89	78.35	High	High	High	High	High	Peak Found	High	High	High	High	1
FALSE	High	Master Protein	Q9Y696	Chloride intracellular channel protein 4 [OS=Homo sapiens]	0	66.858	45	9	158	8	253	28.8	5.59	457.34	9	0	2	0.627	0.378082	116.96	96.8	103.2	57.95	28.47	High	High	High	High	High	High	High	High	High	High	1
FALSE	High	Master Protein	P09622	Dihydrolipoyl dehydrogenase, mitochondrial [OS=Homo sapiens]	0	66.509	28	8	143	8	509	54.1	7.85	387.48	8	0	0	0.952	0.974341	111.7	97.9	102.1	30.41	25.92	High	High	High	High	High	High	High	High	High	High	1
FALSE	High	Master Protein	Q12907	Vesicular integral-membrane protein VIP36 [OS=Homo sapiens]	0	66.456	30	7	118	7	356	40.2	6.95	356.84	7	0	0	0.986	0.938632	109.28	96.9	103.1	53.84	47.81	High	High	High	High	High	High	High	High	High	High	1
FALSE	High	Master Protein	Q8NB12	Histone-lysine N-methyltransferase SMYD1 [OS=Homo sapiens]	0	66.358	32	9	35	9	490	56.6	7.09	94.85	9	0	0	0.987	0.9378	125.7	121	79	27.69	36.46	High	High	High	High	High	High	High	High	High	High	1
FALSE	High	Master Protein	P17987	T-complex protein 1 subunit alpha [OS=Homo sapiens]	0	65.948	30	13	111	13	556	60.3	6.11	269.04	13	0	0	0.941	0.983392	107.66	116.2	83.8	35.21	64.08	High	High	High	High	High	High	High	High	High	High	1	Acetyl [N-Term]
FALSE	High	Master Protein	P54819	Adenylate kinase 2, mitochondrial [OS=Homo sapiens]	0	65.709	39	7	70	7	239	26.5	7.81	226.52	7	0	0	0.948	0.976795	57.1	101.6	98.4	57.72	36.25	Peak Found	High	High	High	High	High	High	High	High	High	1
FALSE	High	Master Protein	P27816	Microtubule-associated protein 4 [OS=Homo sapiens]	0	65.608	13	8	126	8	1152	120.9	5.43	354.61	8	0	0	0.903	0.97701	109.57	145	55	56	38.37	High	High	High	High	High	High	High	High	High	High	1
TRUE	High	Master Protein	P60842	Eukaryotic initiation factor 4A-I [OS=Homo sapiens]	0	65.37	25	7	179	3	406	46.1	5.48	446.72	7	0	0	0.423	0.133971	91.38	136.3	63.7	14.07	87.34	Not Found	High	High	High	High	Peak Found	High	High	High	High	1
FALSE	High	Master Protein	P55084	Trifunctional enzyme subunit beta, mitochondrial [OS=Homo sapiens]	0	65.335	24	7	175	7	474	51.3	9.41	508.54	7	0	0	0.805	0.846842	93.77	109.6	90.4	51.78	40.55	High	High	High	High	High	High	High	High	High	High	1
FALSE	High	Master Protein	Q9BPW8	Protein NipSnap homolog 1 [OS=Homo sapiens]	0	65.242	40	6	81	6	284	33.3	9.31	278.24	6	0	0	0.803	0.844918	63.47	105.7	94.3	22.3	42.34	Not Found	High	High	High	High	High	High	High	High	High	1
FALSE	High	Master Protein	O95782	AP-2 complex subunit alpha-1 [OS=Homo sapiens]	0	64.909	24	16	38	11	977	107.5	7.03	75.13	16	0	5	1.115	0.813564	119.11	153.7	46.3	87.58	119.61	High	High	High	Peak Found	Peak Found	Not Found	High	High	High	Peak Found	1
FALSE	High	Master Protein	P36871	Phosphoglucomutase-1 [OS=Homo sapiens]	0	64.794	32	10	176	10	562	61.4	6.76	488.68	10	0	0	1.207	0.620739	114.88	114.4	85.6	56.41	64.56	Peak Found	High	High	High	High	High	High	High	High	High	1
FALSE	High	Master Protein	O14950	Myosin regulatory light chain 12B [OS=Homo sapiens]	0	64.512	44	9	205	3	172	19.8	4.84	501.83	9	0	0	0.989	0.934301	106.68	100.4	99.6	70.16	47.33	Peak Found	High	High	High	High	High	High	High	High	High	1
FALSE	High	Master Protein	P11940	Polyadenylate-binding protein 1 [OS=Homo sapiens]	0	64.47	26	10	42	6	636	70.6	9.5	128.35	10	0	4	1.802	0.0477189	93.02	80.2	119.8	69.49	26.47	High	High	High	High	Peak Found	Peak Found	Peak Found	High	High	High	1	Acetyl [N-Term]
FALSE	High	Master Protein	A0A2R8Y4L2	Heterogeneous nuclear ribonucleoprotein A1-like 3 [OS=Homo sapiens]	0	64.403	40	6	221	1	275	29.2	9.48	525.02	6	0	0	0.485	0.537058	114.34	144.9	55.1	163.64	80.26	Peak Found	High	High	High	High	High	High	High	High	High	1
FALSE	High	Master Protein	P27348	14-3-3 protein theta [OS=Homo sapiens]	0	64.357	55	10	203	8	245	27.7	4.78	467.58	10	0	0	1.084	0.820084	98.78	94.8	105.2	34.15	37.32	High	High	High	High	High	Peak Found	High	High	High	High	1
FALSE	High	Master Protein	P52907	F-actin-capping protein subunit alpha-1 [OS=Homo sapiens]	0	64.123	38	6	220	4	286	32.9	5.69	614.32	6	0	0	0.788	0.818934	94	124.7	75.3	44.32	40.78	High	High	High	High	High	High	High	High	High	High	1
FALSE	High	Master Protein	Q92499	ATP-dependent RNA helicase DDX1 [OS=Homo sapiens]	0	64.12	21	9	114	9	740	82.4	7.23	297.98	9	0	0	0.738	0.703433	82.5	104.2	95.8	45.35	42.14	High	High	High	High	High	High	High	High	High	High	1
FALSE	High	Master Protein	P07737	Profilin-1 [OS=Homo sapiens]	0	63.587	51	6	337	6	140	15	8.27	816.73	6	0	0	0.99	0.932767	91.66	114.5	85.5	36.99	13.31	High	High	High	High	High	High	High	High	High	High	1
FALSE	High	Master Protein	P11217	Glycogen phosphorylase, muscle form [OS=Homo sapiens]	0	63.568	21	13	75	8	842	97	7.03	169.41	13	0	0	0.874	0.945547	91.49	110	90	96.13	48.41	Peak Found	High	High	High	High	High	High	High	High	High	1
TRUE	High	Master Protein	P54578	Ubiquitin carboxyl-terminal hydrolase 14 [OS=Homo sapiens]	0	62.865	32	10	67	10	494	56	5.3	182.67	10	0	0	0.49	0.102921	101.96	96.6	103.4	40.09	16.02	High	High	High	High	High	High	High	High	High	High	1
FALSE	High	Master Protein	P14866	Heterogeneous nuclear ribonucleoprotein L [OS=Homo sapiens]	0	62.415	26	6	79	6	589	64.1	8.22	257.8	6	0	0	0.776	0.792188	118.33	125.2	74.8	92.32	59.3	High	High	High	High	High	High	High	High	High	High	1
FALSE	High	Master Protein	P63244	Receptor of activated protein C kinase 1 [OS=Homo sapiens]	0	62.286	56	10	114	10	317	35.1	7.69	279.91	10	0	0	1.175	0.67622	83.9	98.7	101.3	29.12	37.72	High	High	High	High	High	High	High	High	High	High	1
FALSE	High	Master Protein	Q13263	Transcription intermediary factor 1-beta [OS=Homo sapiens]	0	62.24	34	12	88	12	835	88.5	5.77	214.89	12	0	0	1.632	0.1103	95.77	75.5	124.5	76.63	62.33	High	High	High	High	High	High	High	High	High	High	1
FALSE	High	Master Protein	Q9Y265	RuvB-like 1 [OS=Homo sapiens]	0	62.209	39	12	103	12	456	50.2	6.42	268.6	12	0	0	0.831	0.956781	106.09	115.5	84.5	55.65	87.63	High	High	High	High	High	High	High	High	High	High	1
FALSE	High	Master Protein	P08559	Pyruvate dehydrogenase E1 component subunit alpha, somatic form, mitochondrial [OS=Homo sapiens]	0	61.486	41	12	123	12	390	43.3	8.06	373.76	12	0	0	1.318	0.443857	101.69	103.8	96.2	73.18	54.01	High	High	High	High	High	High	High	High	High	High	1
FALSE	High	Master Protein	O00151	PDZ and LIM domain protein 1 [OS=Homo sapiens]	0	61.416	39	7	64	7	329	36	7.02	202.34	7	0	0	1.138	0.732163	113.15	85.3	114.7	88.65	46.31	High	High	High	High	High	High	High	High	High	High	1
FALSE	High	Master Protein	Q9NYU2	UDP-glucose:glycoprotein glucosyltransferase 1 [OS=Homo sapiens]	0	61.386	13	12	41	12	1555	177.1	5.63	82.17	12	0	0	0.746	0.770154	82.72	112.4	87.6	67.17	31.51	High	High	High	High	High	High	High	High	High	High	1
FALSE	High	Master Protein	P51659	Peroxisomal multifunctional enzyme type 2 [OS=Homo sapiens]	0	61.266	25	10	90	10	736	79.6	8.84	274.61	10	0	0	0.726	0.735509	122.22	102	98	96.76	68.8	Peak Found	High	High	High	High	High	High	High	High	High	1
FALSE	High	Master Protein	P12235	ADP/ATP translocase 1 [OS=Homo sapiens]	0	60.866	41	11	162	7	298	33	9.76	345.29	11	0	4	0.913	0.988239	85.74	121.3	78.7	32.78	35.5	High	High	High	Peak Found	High	High	High	High	High	High	1
FALSE	High	Master Protein	P52788	Spermine synthase [OS=Homo sapiens]	0	60.721	45	9	104	9	366	41.2	5.02	318.13	9	0	0	0.919	0.993507	93.43	107.5	92.5	21.97	34.75	High	High	High	High	High	High	High	High	High	High	1
FALSE	High	Master Protein	O00303	Eukaryotic translation initiation factor 3 subunit F [OS=Homo sapiens]	0	60.528	34	7	64	7	357	37.5	5.45	214.49	7	0	0	0.596	0.391905	100.38	95.1	104.9	58.29	59.97	Peak Found	High	High	High	High	High	High	High	High	High	1
FALSE	High	Master Protein	P51911	Calponin-1 [OS=Homo sapiens]	0	60.525	30	7	152	7	297	33.2	9.07	448.95	7	0	0	0.683	0.541484	94.67	119.8	80.2	28.86	34.42	High	High	High	High	High	High	High	High	High	High	1
FALSE	High	Master Protein	P61978	Heterogeneous nuclear ribonucleoprotein K [OS=Homo sapiens]	0	60.069	28	8	169	8	463	50.9	5.54	419.63	8	0	0	0.726	0.671358	87.44	113.3	86.7	47.73	36.91	High	High	High	High	High	High	High	High	High	High	1
FALSE	High	Master Protein	Q14240	Eukaryotic initiation factor 4A-II [OS=Homo sapiens]	0	59.866	38	9	136	5	407	46.4	5.48	338.02	9	0	5	0.908	0.982772	102.32	90.6	109.4	47.8	31.18	High	High	High	High	High	High	High	High	High	High	1
FALSE	High	Master Protein	P35237	Serpin B6 [OS=Homo sapiens]	0	59.842	29	8	141	8	376	42.6	5.27	377.16	8	0	0	0.998	0.92488	85.41	110.9	89.1	59.96	43.6	Peak Found	High	High	High	High	High	High	High	High	High	1
FALSE	High	Master Protein	P13804	Electron transfer flavoprotein subunit alpha, mitochondrial [OS=Homo sapiens]	0	59.641	44	9	135	9	333	35.1	8.38	441.29	9	0	0	1.185	0.665492	74.98	105.8	94.2	20.96	27.44	High	High	High	High	High	High	High	High	High	High	1
FALSE	High	Master Protein	P29692	Elongation factor 1-delta [OS=Homo sapiens]	0	59.577	31	8	72	6	281	31.1	5.01	222.39	8	0	2	0.798	0.835614	100.16	98.2	101.8	52.57	58.85	Peak Found	High	High	High	High	High	High	High	High	High	1
FALSE	High	Master Protein	Q07065	Cytoskeleton-associated protein 4 [OS=Homo sapiens]	0	59.067	29	13	46	13	602	66	5.92	108.47	13	0	0	1.252	0.660153	140.01	122.6	77.4	90.05	105.52	High	High	High	High	High	Peak Found	High	High	High	High	1
FALSE	High	Master Protein	P31948	Stress-induced-phosphoprotein 1 [OS=Homo sapiens]	0	59.021	23	10	198	10	543	62.6	6.8	516.12	10	0	0	0.659	0.471952	99.07	127.8	72.2	53.5	56.62	High	High	High	High	High	High	High	High	High	High	1
FALSE	High	Master Protein	P67775	Serine/threonine-protein phosphatase 2A catalytic subunit alpha isoform [OS=Homo sapiens]	0	58.942	42	9	89	7	309	35.6	5.54	247.44	9	0	2	0.723	0.670314	92.41	101.8	98.2	14.4	24.6	High	High	High	High	High	High	High	High	High	High	1
FALSE	High	Master Protein	P24534	Elongation factor 1-beta [OS=Homo sapiens]	0	58.885	52	7	112	5	225	24.7	4.67	312.67	7	0	0	0.853	0.921271	138.45	90.3	109.7	101.84	75.61	High	High	High	High	High	High	High	High	High	High	1
FALSE	High	Master Protein	P00403	Cytochrome c oxidase subunit 2 [OS=Homo sapiens]	0	58.856	37	4	89	4	227	25.5	4.82	239.91	4	0	0	1.031	0.888854	120.08	113.7	86.3	73.07	37	High	High	High	High	High	High	High	High	High	High	1
FALSE	High	Master Protein	Q9H4M9	EH domain-containing protein 1 [OS=Homo sapiens]	0	58.566	40	10	90	9	534	60.6	6.83	241.28	10	0	1	1.378	0.355958	73.25	78.2	121.8	28.47	47.44	High	High	High	High	High	High	High	High	High	High	1
FALSE	High	Master Protein	P13667	Protein disulfide-isomerase A4 [OS=Homo sapiens]	0	58.404	27	10	91	9	645	72.9	5.07	220.31	10	0	1	0.793	0.829279	139.69	105.6	94.4	43.64	62.35	High	High	High	High	High	High	High	High	High	High	1
FALSE	High	Master Protein	Q16698	2,4-dienoyl-CoA reductase [(3E)-enoyl-CoA-producing], mitochondrial [OS=Homo sapiens]	0	58.355	40	7	165	7	335	36	9.28	528.4	7	0	0	1.264	0.524715	115.83	87.5	112.5	51.64	38.68	High	High	High	High	High	High	High	High	High	High	1
FALSE	High	Master Protein	P36776	Lon protease homolog, mitochondrial [OS=Homo sapiens]	0	58.01	16	10	73	10	959	106.4	6.39	197.48	10	0	0	0.687	0.551878	111.16	125.2	74.8	37.21	36.44	Peak Found	High	High	High	High	High	High	High	High	High	1
FALSE	High	Master Protein	O00429	Dynamin-1-like protein [OS=Homo sapiens]	0	57.9	26	12	50	12	736	81.8	6.81	120.54	12	0	0	1.022	0.898968	77.09	49.2	150.8	48.06	36.7	Peak Found	High	High	High	High	High	High	High	High	High	1	Acetyl [N-Term]
FALSE	High	Master Protein	Q8NE79	Blood vessel epicardial substance [OS=Homo sapiens]	0	57.758	36	10	93	10	360	41.4	7.9	213.57	10	0	0	1.535	0.179848	122.14	83.3	116.7	33.07	32.52	Peak Found	High	High	High	High	High	High	High	High	High	1
TRUE	High	Master Protein	Q8NBX0	Saccharopine dehydrogenase-like oxidoreductase [OS=Homo sapiens]	0	57.701	28	6	27	6	429	47.1	9.14	104.18	6	0	0	0.459	0.0339568	106.37	107.7	92.3	32.39	54.17	High	High	High	High	Peak Found	High	High	High	High	High	1
FALSE	High	Master Protein	P04179	Superoxide dismutase [Mn], mitochondrial [OS=Homo sapiens]	0	57.484	52	6	101	6	222	24.7	8.25	303.68	6	0	0	0.912	0.98734	80.98	98.7	101.3	37.2	28.97	High	High	High	High	High	High	High	High	High	High	1
FALSE	High	Master Protein	P30086	Phosphatidylethanolamine-binding protein 1 [OS=Homo sapiens]	0	57.271	67	7	168	7	187	21	7.53	483.28	7	0	0	1.119	0.762196	106.65	95.8	104.2	64.9	45.52	High	High	High	High	High	High	High	High	High	High	1
FALSE	High	Master Protein	O43776	Asparagine--tRNA ligase, cytoplasmic [OS=Homo sapiens]	0	57.129	31	10	114	10	548	62.9	6.25	291.48	10	0	0	1.181	0.671079	94.4	105.1	94.9	61.98	58.51	High	High	High	High	High	High	High	High	High	High	1
FALSE	High	Master Protein	Q96RQ3	Methylcrotonoyl-CoA carboxylase subunit alpha, mitochondrial [OS=Homo sapiens]	0	57.105	19	8	60	8	725	80.4	7.78	148.49	8	0	0	0.812	0.91459	114.04	71	129	77.75	49.78	Peak Found	High	High	High	High	High	High	High	High	High	1
FALSE	High	Master Protein	Q9UPN3	Microtubule-actin cross-linking factor 1, isoforms 1/2/3/4/5 [OS=Homo sapiens]	0	56.701	3	15	49	14	7388	837.8	5.39	101.99	15	0	1	0.87	0.975833	64.16	80	120	87.76	20.98	High	High	High	High	High	High	High	High	High	High	1
FALSE	High	Master Protein	Q08043	Alpha-actinin-3 [OS=Homo sapiens]	0	56.122	12	8	170	1	901	103.2	5.52	502	8	0	0	0.58	0.739844	60.31	122.7	77.3	32.83	59.53	Not Found	High	High	High	High	Not Found	Peak Found	High	Peak Found	High	1
FALSE	High	Master Protein	Q01484	Ankyrin-2 [OS=Homo sapiens]	0	55.863	5	12	56	10	3957	433.4	5.14	144.2	12	0	2	1.307	0.602133	96.49	58.4	141.6	76.22	31.59	High	High	High	High	High	High	High	High	High	High	1
FALSE	High	Master Protein	Q07021	Complement component 1 Q subcomponent-binding protein, mitochondrial [OS=Homo sapiens]	0	55.593	41	6	208	6	282	31.3	4.84	775.25	6	0	0	0.73	0.681047	111.41	105.3	94.7	85.85	48.81	High	High	High	High	High	High	High	High	High	High	1
FALSE	High	Master Protein	P34897	Serine hydroxymethyltransferase, mitochondrial [OS=Homo sapiens]	0	55.342	29	9	58	9	504	56	8.53	163.67	9	0	0	0.708	0.620739	97.97	129.2	70.8	21.96	44.61	High	High	High	High	High	High	High	High	High	High	1
FALSE	High	Master Protein	P12956	X-ray repair cross-complementing protein 6 [OS=Homo sapiens]	0	55.214	30	12	75	12	609	69.8	6.64	162.91	12	0	0	0.813	0.862069	127.46	93.5	106.5	31.01	40.43	Peak Found	High	High	High	High	High	High	High	High	High	1
FALSE	High	Master Protein	P07384	Calpain-1 catalytic subunit [OS=Homo sapiens]	0	54.823	21	9	66	9	714	81.8	5.67	183.95	9	0	0	0.67	0.503329	121.53	128.2	71.8	56.39	39.59	High	High	High	High	High	High	High	High	High	High	1
FALSE	High	Master Protein	P25786	Proteasome subunit alpha type-1 [OS=Homo sapiens]	0	54.812	48	8	67	8	263	29.5	6.61	227.27	8	0	0	0.616	0.342918	104	123.8	76.2	48.23	74.25	Not Found	High	High	High	High	High	High	High	High	High	1
FALSE	High	Master Protein	O75323	Protein NipSnap homolog 2 [OS=Homo sapiens]	0	54.683	34	6	65	6	286	33.7	9.36	232.72	6	0	0	1.774	0.0553092	132.22	52.2	147.8	94.97	93.01	High	High	High	High	High	High	High	High	High	High	1
FALSE	High	Master Protein	P52306	Rap1 GTPase-GDP dissociation stimulator 1 [OS=Homo sapiens]	0	54.551	25	10	29	10	607	66.3	5.31	114.14	10	0	0	0.995	0.912253	63.93	66.1	133.9	63.61	64.82	Peak Found	High	High	High	High	High	High	High	High	High	1	Acetyl [N-Term]
FALSE	High	Master Protein	Q16531	DNA damage-binding protein 1 [OS=Homo sapiens]	0	54.387	17	14	85	14	1140	126.9	5.26	209.56	14	0	0	0.887	0.958863	104.43	106.2	93.8	65.74	59.34	High	High	High	High	High	High	High	High	High	High	1
FALSE	High	Master Protein	P00367	Glutamate dehydrogenase 1, mitochondrial [OS=Homo sapiens]	0	54.356	29	9	148	4	558	61.4	7.8	404.43	9	0	6	0.795	0.831092	99.27	120.4	79.6	55.29	42.29	High	High	High	High	High	High	High	High	High	High	1
FALSE	High	Master Protein	P53621	Coatomer subunit alpha [OS=Homo sapiens]	0	54.21	12	9	38	9	1224	138.3	7.66	117.98	9	0	0	0.508	0.0885218	128.39	175.6	24.4	74.58	58.91	Peak Found	High	High	High	High	High	High	High	High	High	1
FALSE	High	Master Protein	P52597	Heterogeneous nuclear ribonucleoprotein F [OS=Homo sapiens]	0	54.187	35	7	90	6	415	45.6	5.58	256.76	7	0	0	0.664	0.486938	79.76	121.3	78.7	38	36.26	High	High	High	High	High	High	High	High	High	High	1
FALSE	High	Master Protein	O75915	PRA1 family protein 3 [OS=Homo sapiens]	0	54.185	21	3	110	3	188	21.6	9.77	395.97	3	0	0	1.045	0.871261	92.1	86.5	113.5	31.46	33.65	High	High	High	High	High	High	High	High	High	High	1	Acetyl [N-Term]
TRUE	High	Master Protein	O75923	Dysferlin [OS=Homo sapiens]	0	54.177	11	10	35	10	2080	237.1	5.64	105.61	10	0	0	0.395	0.00834317	103.73	101.6	98.4	52.93	48.82	High	High	High	High	High	Not Found	High	High	High	High	1
FALSE	High	Master Protein	Q14BN4	Sarcolemmal membrane-associated protein [OS=Homo sapiens]	0	54.127	13	13	57	13	828	95.1	5.47	146.01	13	0	0	0.515	0.254034	95.11	123.9	76.1	40.44	61.08	High	High	High	High	High	High	High	High	High	High	1
FALSE	High	Master Protein	O14531	Dihydropyrimidinase-related protein 4 [OS=Homo sapiens]	0	53.969	21	8	107	8	572	61.8	7.09	258.36	8	0	0	0.964	0.932413	88.65	76.6	123.4	76.72	28.98	High	High	High	High	High	High	High	High	High	High	1
FALSE	High	Master Protein	P45954	Short/branched chain specific acyl-CoA dehydrogenase, mitochondrial [OS=Homo sapiens]	0	53.856	26	7	45	7	432	47.5	6.99	134.97	7	0	0	1.619	0.175616	107.63	111.1	88.9	200.36	89.35	High	High	High	High	High	High	High	High	High	High	1
FALSE	High	Master Protein	P49189	4-trimethylaminobutyraldehyde dehydrogenase [OS=Homo sapiens]	0	53.778	23	7	53	7	494	53.8	5.87	178.66	7	0	0	0.665	0.488192	86.71	132.5	67.5	41.32	18.79	High	High	High	High	High	High	High	High	High	High	1
FALSE	High	Master Protein	P39023	60S ribosomal protein L3 [OS=Homo sapiens]	0	53.688	16	4	112	4	403	46.1	10.18	415.67	4	0	0	0.825	0.882314	91.98	110.3	89.7	57.34	18.63	High	High	High	High	High	High	High	High	High	High	1
FALSE	High	Master Protein	Q16836	Hydroxyacyl-coenzyme A dehydrogenase, mitochondrial [OS=Homo sapiens]	0	53.557	37	6	98	6	314	34.3	8.85	337.57	6	0	0	1.05	0.865139	103.27	122.3	77.7	37.72	35.8	High	High	High	High	High	High	High	High	High	High	1
FALSE	High	Master Protein	P40925	Malate dehydrogenase, cytoplasmic [OS=Homo sapiens]	0	53.555	35	11	109	11	334	36.4	7.36	212.17	11	0	0	1.162	0.697472	136.6	100	100	68.1	145.83	Peak Found	High	High	High	High	High	High	High	High	High	1
FALSE	High	Master Protein	Q16881	Thioredoxin reductase 1, cytoplasmic [OS=Homo sapiens]	0	53.549	23	9	47	9	649	70.9	7.39	166.55	9	0	0	0.786	0.817812	102.22	120.6	79.4	20.99	38.83	High	High	High	High	High	High	High	High	High	High	1
FALSE	High	Master Protein	P08574	Cytochrome c1, heme protein, mitochondrial [OS=Homo sapiens]	0	53.427	26	5	215	5	325	35.4	9	678.75	5	0	0	0.685	0.545911	89.35	111.9	88.1	13.24	31.84	High	High	High	High	High	High	High	High	High	High	1
FALSE	High	Master Protein	P09960	Leukotriene A-4 hydrolase [OS=Homo sapiens]	0	53.391	18	8	98	8	611	69.2	6.18	245.49	8	0	0	0.649	0.443926	89.38	183.4	16.6	80.84	58.95	High	High	High	High	High	High	High	High	High	High	1
FALSE	High	Master Protein	Q12906	Interleukin enhancer-binding factor 3 [OS=Homo sapiens]	0	53.204	16	8	114	8	894	95.3	8.76	321.42	8	0	0	0.648	0.443817	106.76	145	55	106.53	47.19	High	High	High	High	High	High	High	High	High	High	1
FALSE	High	Master Protein	O60313	Dynamin-like 120 kDa protein, mitochondrial [OS=Homo sapiens]	0	53.201	15	10	44	10	960	111.6	7.87	116.98	10	0	0	0.727	0.695423	100.44	91.6	108.4	48.88	45.45	Peak Found	High	High	High	High	Peak Found	High	High	High	High	1
FALSE	High	Master Protein	O00299	Chloride intracellular channel protein 1 [OS=Homo sapiens]	0	53.148	53	8	92	8	241	26.9	5.17	275.2	8	0	0	0.696	0.583112	96.36	97.6	102.4	42.2	60.51	High	High	High	High	High	High	High	High	High	High	1
FALSE	High	Master Protein	Q13200	26S proteasome non-ATPase regulatory subunit 2 [OS=Homo sapiens]	0	53.133	20	9	85	9	908	100.1	5.2	248.6	9	0	0	0.826	0.884911	93.35	102.2	97.8	33.39	28.16	High	High	High	High	High	High	High	High	High	High	1
FALSE	High	Master Protein	Q14194	Dihydropyrimidinase-related protein 1 [OS=Homo sapiens]	0	53.071	34	13	30	10	572	62.1	7.03	56.44	13	0	1	1.909	0.0477189	116.46	75.1	124.9	68.58	57.09	Not Found	High	High	High	Peak Found	Peak Found	High	High	High	High	1
FALSE	High	Master Protein	Q96QK1	Vacuolar protein sorting-associated protein 35 [OS=Homo sapiens]	0	52.898	20	11	68	11	796	91.6	5.49	137.72	11	0	0	1.213	0.611006	82.89	98.4	101.6	23.34	69.37	Not Found	High	High	High	High	High	High	High	High	High	1
FALSE	High	Master Protein	Q13838	Spliceosome RNA helicase DDX39B [OS=Homo sapiens]	0	52.872	29	9	69	5	428	49	5.67	147.57	9	0	3	0.935	0.966267	110.07	77.6	122.4	74.63	57.33	Peak Found	High	High	High	High	High	High	High	High	High	1
FALSE	High	Master Protein	P35749	Myosin-11 [OS=Homo sapiens]	0	52.742	9	11	121	5	1972	227.2	5.5	277.61	11	0	0	0.529	0.671358	117.86	131.3	68.7	67.25	61.53	Not Found	High	High	High	High	Peak Found	Peak Found	Peak Found	High	High	1
FALSE	High	Master Protein	P17844	Probable ATP-dependent RNA helicase DDX5 [OS=Homo sapiens]	0	52.724	30	14	41	9	614	69.1	8.92	86.17	14	0	6	0.739	0.704469	119.34	98.1	101.9	33.71	42.05	Peak Found	High	High	High	High	High	High	High	High	High	1
FALSE	High	Master Protein	P17540	Creatine kinase S-type, mitochondrial [OS=Homo sapiens]	0	52.641	38	9	83	9	419	47.5	8.19	233.15	9	0	0	0.963	0.959958	104.18	87.3	112.7	54.54	46.82	High	High	High	High	High	High	High	High	High	High	1
FALSE	High	Master Protein	Q02978	Mitochondrial 2-oxoglutarate/malate carrier protein [OS=Homo sapiens]	0	52.485	33	9	113	9	314	34	9.91	273.49	9	0	0	1.063	0.845412	77.08	107.9	92.1	29.81	31.87	High	High	High	High	High	High	High	High	High	High	1
FALSE	High	Master Protein	Q9Y2J2	Band 4.1-like protein 3 [OS=Homo sapiens]	0	52.392	18	14	67	14	1087	120.6	5.19	161.3	14	0	0	0.572	0.54257	141.7	131.1	68.9	62.76	130.96	Not Found	High	High	High	High	High	High	High	High	High	1
FALSE	High	Master Protein	P35232	Prohibitin 1 [OS=Homo sapiens]	0	52.29	51	8	91	8	272	29.8	5.76	296.35	8	0	0	0.93	0.995268	89.78	102.4	97.6	82.62	38.67	High	High	High	High	High	High	High	High	High	High	1
FALSE	High	Master Protein	P27824	Calnexin [OS=Homo sapiens]	0	52.06	23	9	63	8	592	67.5	4.6	138.83	9	0	1	1.705	0.0794237	95.26	76.3	123.7	61.18	39.8	Peak Found	High	High	High	High	High	High	High	High	High	1
FALSE	High	Master Protein	O15371	Eukaryotic translation initiation factor 3 subunit D [OS=Homo sapiens]	0	52.036	33	9	70	9	548	63.9	6.05	195.5	9	0	0	0.803	0.877196	96.14	109.2	90.8	69.16	34.69	High	High	High	High	High	High	High	High	High	High	1
FALSE	High	Master Protein	Q92841	Probable ATP-dependent RNA helicase DDX17 [OS=Homo sapiens]	0	51.781	19	12	50	7	729	80.2	8.27	98.02	12	0	0	0.956	0.96669	72.01	114.7	85.3	33.55	13.11	Not Found	High	High	High	High	High	High	High	High	High	1
FALSE	High	Master Protein	Q15691	Microtubule-associated protein RP/EB family member 1 [OS=Homo sapiens]	0	51.733	43	8	49	8	268	30	5.14	165.43	8	0	0	0.615	0.340592	79.85	128.3	71.7	33.82	46.61	High	High	High	High	High	High	High	High	High	High	1
FALSE	High	Master Protein	O43143	ATP-dependent RNA helicase DHX15 [OS=Homo sapiens]	0	51.616	21	9	45	9	795	90.9	7.46	111.47	9	0	0	0.544	0.263006	123.59	78.8	121.2	86.4	62.51	Not Found	High	High	High	High	High	High	High	High	High	1
FALSE	High	Master Protein	P51991	Heterogeneous nuclear ribonucleoprotein A3 [OS=Homo sapiens]	0	51.273	26	7	95	7	378	39.6	9.01	205.84	7	0	0	1.152	0.712756	99.77	106.3	93.7	61.18	40	High	High	High	High	High	High	High	High	High	High	1
FALSE	High	Master Protein	Q92973	Transportin-1 [OS=Homo sapiens]	0	51.226	21	11	69	8	898	102.3	4.98	150.71	11	0	3	0.494	0.291621	124.42	117.7	82.3	63.1	73.53	Not Found	High	High	High	High	High	High	High	Peak Found	High	1
FALSE	High	Master Protein	Q8NDY3	Inactive ADP-ribosyltransferase ARH2 [OS=Homo sapiens]	0	51.05	47	9	71	9	354	40.1	5.85	193.62	9	0	0	1.707	0.0787827	106.64	166.7	33.3	71.98	77.47	Peak Found	High	High	High	High	Peak Found	High	High	High	High	1
FALSE	High	Master Protein	Q7KZF4	Staphylococcal nuclease domain-containing protein 1 [OS=Homo sapiens]	0	50.869	17	11	96	11	910	101.9	7.17	212.11	11	0	0	0.765	0.856349	98.35	121.8	78.2	39.39	43.9	High	High	High	High	High	Not Found	High	High	High	High	1
FALSE	High	Master Protein	P24539	ATP synthase F(0) complex subunit B1, mitochondrial [OS=Homo sapiens]	0	50.74	20	6	329	6	256	28.9	9.36	745.09	6	0	0	0.669	0.502057	67.22	120	80	14.5	37.44	High	High	High	High	High	High	High	High	High	High	1
FALSE	High	Master Protein	P23528	Cofilin-1 [OS=Homo sapiens]	0	50.706	37	7	140	3	166	18.5	8.09	445.44	7	0	4	0.851	0.919844	116.38	102.8	97.2	75.47	45.23	High	High	High	High	High	High	High	High	High	High	1
FALSE	High	Master Protein	P02533	Keratin, type I cytoskeletal 14 [OS=Homo sapiens]	0	50.705	27	9	93	5	472	51.5	5.16	242.03	9	0	2	1.255	0.61217	86.51	93	107	47.28	47.66	High	High	High	High	High	High	High	High	High	Peak Found	1
FALSE	High	Master Protein	Q14152	Eukaryotic translation initiation factor 3 subunit A [OS=Homo sapiens]	0	50.497	10	11	92	11	1382	166.5	6.79	162.94	11	0	0	1.003	0.894987	104.39	95.2	104.8	69.35	14.46	High	High	High	High	High	High	High	High	High	High	1
TRUE	High	Master Protein	P29144	Tripeptidyl-peptidase 2 [OS=Homo sapiens]	0	50.259	13	10	91	10	1249	138.3	6.32	230.06	10	0	0	0.37	0.00281064	111.22	137.3	62.7	46.82	86.56	High	High	High	High	High	Peak Found	High	High	High	High	1
FALSE	High	Master Protein	Q5T4S7	E3 ubiquitin-protein ligase UBR4 [OS=Homo sapiens]	0	50.082	4	10	25	10	5183	573.5	6.04	76.95	10	0	0	0.77	0.930861	94.88	89.3	110.7	37.87	65.8	Peak Found	High	High	High	High	Not Found	High	High	High	High	1
FALSE	High	Master Protein	O95373	Importin-7 [OS=Homo sapiens]	0	49.981	13	8	42	8	1038	119.4	4.82	134.52	8	0	0	0.799	0.847333	67.9	116	84	73.35	62.62	Peak Found	High	High	High	High	High	High	High	High	High	1
FALSE	High	Master Protein	P11277	Spectrin beta chain, erythrocytic [OS=Homo sapiens]	0	49.954	9	11	55	11	2137	246.3	5.27	114.05	11	0	0	1.11	0.801946	94.16	93.8	106.2	40.21	22.84	Not Found	High	High	High	High	High	High	High	High	High	1
FALSE	High	Master Protein	P19021	Peptidyl-glycine alpha-amidating monooxygenase [OS=Homo sapiens]	0	49.885	17	8	45	8	973	108.3	6.42	121.15	8	0	0	1.094	0.772011	70.81	101	99	66.32	40.75	High	High	High	High	High	High	High	High	High	High	1
FALSE	High	Master Protein	P32969	60S ribosomal protein L9 [OS=Homo sapiens]	0	49.871	48	6	128	6	192	21.9	9.95	431.25	6	0	0	0.646	0.435177	106.42	116	84	12.66	62.68	High	High	High	High	High	High	High	High	High	High	1
FALSE	High	Master Protein	O00629	Importin subunit alpha-3 [OS=Homo sapiens]	0	49.851	20	6	44	4	521	57.9	4.96	122.76	6	0	2	0.828	0.91459	108.43	138.2	61.8	33.93	39.58	High	High	High	High	High	High	High	High	High	High	1
FALSE	High	Master Protein	A0A0B4J2D5	Putative glutamine amidotransferase-like class 1 domain-containing protein 3B, mitochondrial [OS=Homo sapiens]	0	49.829	37	4	82	4	268	28.1	8.27	254.85	4	0	0	0.651	0.451818	103.31	123.5	76.5	62.35	13.41	High	High	High	High	High	High	High	High	High	High	1
TRUE	High	Master Protein	P53618	Coatomer subunit beta [OS=Homo sapiens]	0	49.703	19	12	23	12	953	107.1	6.05	46.61	12	0	0	2.625	0.0576639	124.31	39.2	160.8	139.53	82.66	Not Found	Not Found	High	Peak Found	High	Peak Found	High	High	High	High	1
FALSE	High	Master Protein	P23396	40S ribosomal protein S3 [OS=Homo sapiens]	0	49.644	52	10	113	10	243	26.7	9.66	264.18	10	0	0	0.966	0.957271	127.88	93	107	78.89	56.53	High	High	High	High	High	High	High	High	High	High	1
TRUE	High	Master Protein	O60664	Perilipin-3 [OS=Homo sapiens]	0	49.633	29	7	50	7	434	47	5.44	120.97	7	0	0	2.005	0.0223927	105.55	91.4	108.6	47.04	28.27	High	High	High	High	High	High	High	High	High	High	1
FALSE	High	Master Protein	Q9UHD8	Septin-9 [OS=Homo sapiens]	0	49.36	26	8	110	8	586	65.4	8.97	263.77	8	0	0	0.61	0.3253	102.77	120.7	79.3	40.53	47.82	High	High	High	High	High	High	High	High	High	High	1
FALSE	High	Master Protein	Q14980	Nuclear mitotic apparatus protein 1 [OS=Homo sapiens]	0	49.35	9	11	48	11	2115	238.1	5.78	102.89	11	0	0	0.654	0.861978	104.26	86.5	113.5	81.33	175.39	High	High	High	High	High	High	High	High	High	High	1
FALSE	High	Master Protein	P63241	Eukaryotic translation initiation factor 5A-1 [OS=Homo sapiens]	0	49.329	51	4	83	4	154	16.8	5.24	252.6	4	0	0	0.828	0.88781	91.7	112.3	87.7	42.62	42.08	High	High	High	High	High	High	High	High	High	High	1
FALSE	High	Master Protein	P45974	Ubiquitin carboxyl-terminal hydrolase 5 [OS=Homo sapiens]	0	49.219	15	8	124	8	858	95.7	5.03	322.55	8	0	0	1.409	0.314774	99.59	90.1	109.9	52.03	34.47	Peak Found	High	High	High	High	High	High	High	High	High	1
FALSE	High	Master Protein	P05556	Integrin beta-1 [OS=Homo sapiens]	0	49.183	20	9	181	9	798	88.4	5.39	505.07	9	0	0	0.667	0.494506	98.18	119.6	80.4	43.56	18.54	High	High	High	High	High	High	High	High	High	High	1
FALSE	High	Master Protein	P49591	Serine--tRNA ligase, cytoplasmic [OS=Homo sapiens]	0	49.108	22	7	78	7	514	58.7	6.43	199.07	7	0	0	0.597	0.366475	108.6	101.6	98.4	33.27	49.57	Peak Found	High	High	High	High	High	High	High	High	High	1
FALSE	High	Master Protein	P23526	Adenosylhomocysteinase [OS=Homo sapiens]	0	49.085	23	7	84	7	432	47.7	6.34	203.79	7	0	0	0.958	0.966267	91.9	113.9	86.1	33.13	36.73	High	High	High	High	High	High	High	High	High	High	1
FALSE	High	Master Protein	P04083	Annexin A1 [OS=Homo sapiens]	0	48.813	38	9	75	9	346	38.7	7.02	203.07	9	0	0	1.148	0.718364	69.52	94.7	105.3	22.56	26.06	Peak Found	High	High	High	High	High	High	High	High	High	1
FALSE	High	Master Protein	Q9Y230	RuvB-like 2 [OS=Homo sapiens]	0	48.797	25	8	78	8	463	51.1	5.64	195.3	8	0	0	0.591	0.503445	72.92	127.1	72.9	28.12	61.95	High	High	High	High	High	High	High	High	High	High	1
FALSE	High	Master Protein	Q9UEW8	STE20/SPS1-related proline-alanine-rich protein kinase [OS=Homo sapiens]	0	48.776	17	6	45	5	545	59.4	6.29	121.78	6	0	1	1.439	0.277451	137.89	97.6	102.4	70.19	38.06	High	High	High	High	High	High	High	High	High	High	1
FALSE	High	Master Protein	P07942	Laminin subunit beta-1 [OS=Homo sapiens]	0	48.726	8	7	55	7	1786	197.9	4.94	132.02	7	0	0	0.553	0.16929	100.39	102.5	97.5	47.41	76.44	High	High	High	High	High	High	High	High	High	High	1
FALSE	High	Master Protein	P53582	Methionine aminopeptidase 1 [OS=Homo sapiens]	0	48.705	41	9	91	9	386	43.2	7.17	209.68	9	0	0	0.753	0.735509	71.45	106.8	93.2	30.71	47.9	High	High	High	High	High	High	High	High	High	High	1
FALSE	High	Master Protein	P14868	Aspartate--tRNA ligase, cytoplasmic [OS=Homo sapiens]	0	48.684	23	11	61	11	501	57.1	6.55	134.76	11	0	0	0.792	0.91237	135.78	115.8	84.2	82.9	69.3	Peak Found	High	High	High	High	High	High	High	High	High	1
FALSE	High	Master Protein	Q00796	Sorbitol dehydrogenase [OS=Homo sapiens]	0	48.677	32	6	66	6	357	38.3	7.97	173.73	6	0	0	1.092	0.827434	122.32	93.3	106.7	57.05	36.96	High	High	High	High	High	High	High	High	High	High	1
FALSE	High	Master Protein	P11717	Cation-independent mannose-6-phosphate receptor [OS=Homo sapiens]	0	48.628	9	10	40	10	2491	274.2	5.94	113.96	10	0	0	0.643	0.726517	106.97	132.4	67.6	61.28	60.8	Peak Found	High	High	High	High	High	High	High	High	High	1
TRUE	High	Master Protein	P21810	Biglycan [OS=Homo sapiens]	0	48.552	32	7	68	7	368	41.6	7.52	212.59	7	0	0	0.374	0.0100962	128.11	125.1	74.9	90.48	82.87	High	High	High	High	High	High	High	High	High	Peak Found	1
FALSE	High	Master Protein	P62826	GTP-binding nuclear protein Ran [OS=Homo sapiens]	0	48.55	37	7	82	7	216	24.4	7.49	181.51	7	0	0	0.855	0.924788	109.2	87.2	112.8	53.61	38.62	High	High	High	High	High	High	High	High	High	High	1
FALSE	High	Master Protein	O75947	ATP synthase subunit d, mitochondrial [OS=Homo sapiens]	0	48.515	47	6	83	6	161	18.5	5.3	249.97	6	0	0	0.755	0.740479	78.75	103.1	96.9	28.6	23.11	High	High	High	High	High	High	High	High	High	High	1
FALSE	High	Master Protein	P07237	Protein disulfide-isomerase [OS=Homo sapiens]	0	48.354	33	11	123	11	508	57.1	4.87	277.11	11	0	0	1.457	0.256876	116.43	113.6	86.4	81.08	51.71	High	High	High	High	High	High	High	High	High	High	1
FALSE	High	Master Protein	Q13683	Integrin alpha-7 [OS=Homo sapiens]	0	48.303	14	8	55	8	1181	128.9	5.73	145.22	8	0	0	0.864	0.932767	108.98	100.8	99.2	140.87	47.3	Peak Found	High	High	High	High	Peak Found	High	High	High	High	1
FALSE	High	Master Protein	P05413	Fatty acid-binding protein, heart [OS=Homo sapiens]	0	48.162	64	9	321	9	133	14.8	6.8	650.84	9	0	0	0.731	0.68319	128.63	118.2	81.8	78.27	140.43	High	High	High	High	High	High	High	High	High	High	1
FALSE	High	Master Protein	Q04917	14-3-3 protein eta [OS=Homo sapiens]	0	48.131	37	6	199	4	246	28.2	4.84	473.03	6	0	0	0.747	0.722924	143.59	131.4	68.6	110.02	135.37	High	High	High	High	High	High	High	High	High	High	1
FALSE	High	Master Protein	Q86TX2	Acyl-coenzyme A thioesterase 1 [OS=Homo sapiens]	0	48.071	32	8	109	8	421	46.2	7.34	309.27	8	0	0	0.625	0.37238	116	136.6	63.4	70.92	44.79	High	High	High	High	High	High	High	High	High	High	1
FALSE	High	Master Protein	P62333	26S proteasome regulatory subunit 10B [OS=Homo sapiens]	0	47.948	25	6	66	6	389	44.1	7.49	215.88	6	0	0	0.923	0.981297	79.12	120.5	79.5	52.16	56.59	Peak Found	High	High	High	High	High	High	High	High	High	1
FALSE	High	Master Protein	O43837	Isocitrate dehydrogenase [NAD] subunit beta, mitochondrial [OS=Homo sapiens]	0	47.945	31	10	96	10	385	42.2	8.46	236.83	10	0	0	1.353	0.357115	104.7	72	128	45.17	51.58	Peak Found	High	High	High	High	High	High	High	High	High	1
FALSE	High	Master Protein	O75489	NADH dehydrogenase [ubiquinone] iron-sulfur protein 3, mitochondrial [OS=Homo sapiens]	0	47.886	37	12	29	12	264	30.2	7.5	76.12	12	0	0	0.795	0.831092	103.53	83.6	116.4	72.84	70.09	Peak Found	High	High	Peak Found	High	High	High	High	High	High	1
FALSE	High	Master Protein	Q6YN16	Hydroxysteroid dehydrogenase-like protein 2 [OS=Homo sapiens]	0	47.827	36	8	65	8	418	45.4	7.99	173.12	8	0	0	1.192	0.650502	62.74	117	83	55.39	19.36	High	High	High	High	High	High	High	High	High	High	1
FALSE	High	Master Protein	Q9BYV6	Tripartite motif-containing protein 55 [OS=Homo sapiens]	0	47.813	30	9	90	9	548	60.4	4.77	310.41	9	0	0	1.564	0.197148	109.62	87.1	112.9	164.57	61.36	High	High	High	High	High	High	High	High	High	High	1
FALSE	High	Master Protein	P61247	40S ribosomal protein S3a [OS=Homo sapiens]	0	47.677	17	5	251	5	264	29.9	9.73	617.34	5	0	0	0.935	0.988884	83.5	98.1	101.9	69.7	28.45	High	High	High	High	High	High	High	High	High	High	1
TRUE	High	Master Protein	P25787	Proteasome subunit alpha type-2 [OS=Homo sapiens]	0	47.559	34	6	93	6	234	25.9	7.43	261.81	6	0	0	2.114	0.00852762	111.28	73.4	126.6	70.45	53.4	High	High	High	High	High	High	High	High	High	High	1
FALSE	High	Master Protein	O94973	AP-2 complex subunit alpha-2 [OS=Homo sapiens]	0	47.332	14	9	34	4	939	103.9	6.96	83.95	9	0	0	1.053	0.82957	58.74	70	130	28.29	49.39	High	High	High	High	High	High	High	High	High	High	1
FALSE	High	Master Protein	Q9Y512	Sorting and assembly machinery component 50 homolog [OS=Homo sapiens]	0	47.242	28	8	92	8	469	51.9	6.9	268.69	8	0	0	0.774	0.864904	110.02	109.8	90.2	21.26	31.69	High	High	High	High	High	High	High	High	High	High	1
FALSE	High	Master Protein	Q15327	Ankyrin repeat domain-containing protein 1 [OS=Homo sapiens]	0	47.232	38	8	148	8	319	36.2	7.5	263.65	8	0	0	0.768	0.774457	119.04	109	91	70.79	81.61	Peak Found	High	High	High	High	Peak Found	High	High	High	High	1
FALSE	High	Master Protein	Q8WX93	Palladin [OS=Homo sapiens]	0	47.176	10	7	37	7	1383	150.5	7.09	95.08	7	0	0	1.164	0.719269	126.92	123.2	76.8	45.75	99.53	Peak Found	High	High	High	High	High	High	High	High	High	1
FALSE	High	Master Protein	P62191	26S proteasome regulatory subunit 4 [OS=Homo sapiens]	0	47.097	20	5	63	5	440	49.2	6.21	199.34	5	0	0	1.043	0.874003	75.76	91	109	41.67	36.8	High	High	High	High	High	High	High	High	High	High	1
TRUE	High	Master Protein	P61586	Transforming protein RhoA [OS=Homo sapiens]	0	47.013	49	5	105	1	193	21.8	6.1	225.54	5	0	0	100	5.5167e-17			200			Not Found	Not Found	Not Found	Not Found	Not Found	Not Found	Not Found	High	Not Found	Not Found	1
FALSE	High	Master Protein	P06753	Tropomyosin alpha-3 chain [OS=Homo sapiens]	0	46.987	24	9	214	1	285	32.9	4.72	492.75	9	0	0	1.346	0.537814	204.55	85.3	114.7		114.51	Not Found	High	High	Not Found	High	Not Found	High	High	High	High	1
FALSE	High	Master Protein	P04632	Calpain small subunit 1 [OS=Homo sapiens]	0	46.951	31	5	64	5	268	28.3	5.2	218.07	5	0	0	1.119	0.762572	64.42	89.4	110.6	35.03	24.31	High	High	High	High	High	High	High	High	High	High	1	Acetyl [N-Term]
FALSE	High	Master Protein	Q00325	Phosphate carrier protein, mitochondrial [OS=Homo sapiens]	0	46.822	33	8	90	8	362	40.1	9.38	189.02	8	0	0	0.705	0.611006	118.01	118.6	81.4	69.86	65.09	Peak Found	High	High	High	High	High	High	High	High	High	1
FALSE	High	Master Protein	Q9Y4L1	Hypoxia up-regulated protein 1 [OS=Homo sapiens]	0	46.628	18	10	38	10	999	111.3	5.22	103.81	10	0	0	1.285	0.489676	81.51	94.5	105.5	55.02	19.06	High	High	High	High	High	High	High	High	High	High	1
FALSE	High	Master Protein	P54136	Arginine--tRNA ligase, cytoplasmic [OS=Homo sapiens]	0	46.621	23	10	60	10	660	75.3	6.68	145.45	10	0	0	1.251	0.563244	80.92	106.2	93.8	9.32	26.7	Not Found	High	High	High	High	High	High	High	High	High	1
FALSE	High	Master Protein	Q99873	Protein arginine N-methyltransferase 1 [OS=Homo sapiens]	0	46.567	29	8	106	8	371	42.4	5.35	229.02	8	0	0	0.625	0.369425	112.58	114.9	85.1	47.26	59.37	Peak Found	High	High	High	High	Peak Found	High	High	High	High	1
FALSE	High	Master Protein	P28482	Mitogen-activated protein kinase 1 [OS=Homo sapiens]	0	46.423	33	7	35	7	360	41.4	6.98	74.81	7	0	0	1.454	0.443817	120.12	64.3	135.7	73.01	52.62	Peak Found	High	Peak Found	High	High	High	High	High	High	High	1
FALSE	High	Master Protein	Q14103	Heterogeneous nuclear ribonucleoprotein D0 [OS=Homo sapiens]	0	46.394	18	7	136	5	355	38.4	7.81	291.99	7	0	2	0.933	0.990548	105.5	102.7	97.3	44.9	31.68	High	High	High	High	High	High	High	High	High	High	1
FALSE	High	Master Protein	Q9P2J5	Leucine--tRNA ligase, cytoplasmic [OS=Homo sapiens]	0	46.359	14	12	70	12	1176	134.4	7.3	152.88	12	0	0	1.501	0.193576	99.8	81.3	118.7	16.6	38.81	High	High	High	High	High	High	High	High	High	High	1
FALSE	High	Master Protein	Q96AC1	Fermitin family homolog 2 [OS=Homo sapiens]	0	46.124	17	8	52	8	680	77.8	6.7	128.59	8	0	0	0.961	0.936197	72.06	105.8	94.2	57.06	23.81	High	High	High	Peak Found	High	High	High	High	Peak Found	High	1
FALSE	High	Master Protein	Q99460	26S proteasome non-ATPase regulatory subunit 1 [OS=Homo sapiens]	0	46.048	17	12	27	12	953	105.8	5.39	67.6	12	0	0	0.917	0.959822	105.15	77.2	122.8	101.91	92.76	Not Found	High	High	High	High	High	High	High	High	High	1
FALSE	High	Master Protein	P27695	DNA-(apurinic or apyrimidinic site) endonuclease [OS=Homo sapiens]	0	45.849	28	6	44	6	318	35.5	8.12	147.37	6	0	0	0.625	0.370438	122.12	110.7	89.3	78.91	55.73	Not Found	High	High	High	High	High	High	High	High	High	1
FALSE	High	Master Protein	P43686	26S proteasome regulatory subunit 6B [OS=Homo sapiens]	0	45.564	24	6	97	6	418	47.3	5.21	276.76	6	0	0	0.879	0.951168	89.75	87.6	112.4	48.1	36.18	High	High	High	High	High	High	High	High	High	High	1
FALSE	High	Master Protein	Q96CN7	Isochorismatase domain-containing protein 1 [OS=Homo sapiens]	0	45.33	32	6	50	6	298	32.2	7.39	141.22	6	0	0	0.793	0.895103	100.47	66.6	133.4	115.4	39.55	Peak Found	High	High	High	High	High	High	High	High	High	1
FALSE	High	Master Protein	Q15366	Poly(rC)-binding protein 2 [OS=Homo sapiens]	0	45.305	22	6	121	4	365	38.6	6.79	213.97	6	0	0	1.314	0.53347	128.11	70.7	129.3	95.39	95.27	High	High	High	High	High	High	High	High	High	High	1
FALSE	High	Master Protein	P33176	Kinesin-1 heavy chain [OS=Homo sapiens]	0	45.278	13	9	52	9	963	109.6	6.51	107.05	9	0	0	0.763	0.924788	68.29	63.2	136.8	75.01	64.45	High	High	High	Peak Found	High	High	High	High	Peak Found	High	1
FALSE	High	Master Protein	P31946	14-3-3 protein beta/alpha [OS=Homo sapiens]	0	45.107	30	6	194	4	246	28.1	4.83	468.99	6	0	0	1.158	0.704469	72.57	88.7	111.3	46.51	47.48	High	High	High	High	High	High	High	High	High	High	1
TRUE	High	Master Protein	P30566	Adenylosuccinate lyase [OS=Homo sapiens]	0	45.078	28	6	37	6	484	54.9	7.11	133.55	6	0	0	0.443	0.0301221	73.97	121	79	62.38	18.25	Peak Found	High	High	High	High	High	High	High	High	High	1
FALSE	High	Master Protein	O95299	NADH dehydrogenase [ubiquinone] 1 alpha subcomplex subunit 10, mitochondrial [OS=Homo sapiens]	0	45.033	26	6	26	6	355	40.7	8.48	74.16	6	0	0	0.784	0.899404	109.59	158.2	41.8	82.8	39.31	Not Found	High	High	High	High	Not Found	High	High	High	High	1
FALSE	High	Master Protein	P11766	Alcohol dehydrogenase class-3 [OS=Homo sapiens]	0	45.014	21	5	123	5	374	39.7	7.49	390.77	5	0	0	0.66	0.474478	101.89	106.3	93.7	73.62	51.12	High	High	High	High	High	High	High	High	High	High	1
FALSE	High	Master Protein	O95202	Mitochondrial proton/calcium exchanger protein [OS=Homo sapiens]	0	44.873	15	7	50	7	739	83.3	6.7	126.63	7	0	0	0.847	0.954709	100.79	76.8	123.2	86.35	94.66	Peak Found	High	High	Peak Found	High	Peak Found	High	High	High	High	1
FALSE	High	Master Protein	P99999	Cytochrome c [OS=Homo sapiens]	0	44.393	43	6	100	6	105	11.7	9.57	139.41	6	0	0	0.895	0.96807	118.01	103.3	96.7	61.28	39.47	High	High	High	High	High	High	High	High	High	High	1
FALSE	High	Master Protein	P17858	ATP-dependent 6-phosphofructokinase, liver type [OS=Homo sapiens]	0	44.324	18	9	108	7	780	85	7.5	195.56	9	0	0	0.717	0.894296	60.33	141.7	58.3	29.46	91.4	High	High	High	High	High	Peak Found	High	High	High	High	1
FALSE	High	Master Protein	Q10567	AP-1 complex subunit beta-1 [OS=Homo sapiens]	0	44.298	14	10	51	6	949	104.5	5.06	125.14	10	0	0	0.647	0.818934	109.84	91.6	108.4	83.25	38.43	High	High	High	Peak Found	High	High	High	High	High	High	1
FALSE	High	Master Protein	Q96CM8	Medium-chain acyl-CoA ligase ACSF2, mitochondrial [OS=Homo sapiens]	0	44.195	19	8	63	8	615	68.1	7.55	178.91	8	0	0	0.802	0.861978	117.5	135.4	64.6	50.07	59.43	High	High	High	High	High	High	High	High	High	High	1
FALSE	High	Master Protein	Q9H223	EH domain-containing protein 4 [OS=Homo sapiens]	0	44.164	31	8	86	7	541	61.1	6.76	209.41	8	0	0	1.743	0.0821018	104.94	109.1	90.9	70.92	54.25	High	High	High	High	High	High	High	High	High	High	1
FALSE	High	Master Protein	Q13177	Serine/threonine-protein kinase PAK 2 [OS=Homo sapiens]	0	44.143	26	7	69	6	524	58	5.96	190.87	7	0	1	0.781	0.805823	97.02	117.8	82.2	64.98	49.74	High	High	High	High	High	High	High	High	High	High	1
FALSE	High	Master Protein	P61981	14-3-3 protein gamma [OS=Homo sapiens]	0	44.046	39	6	188	4	247	28.3	4.89	487.29	6	0	0	1.153	0.710904	65.66	87.2	112.8	39.15	34.47	High	High	High	High	High	High	High	High	High	High	1
TRUE	High	Master Protein	Q9Y281	Cofilin-2 [OS=Homo sapiens]	0	44.001	45	7	65	3	166	18.7	7.88	207.24	7	0	0	0.398	0.0259191	132.32	112.5	87.5	150.08	70.06	High	High	High	High	High	High	Peak Found	High	High	High	1
FALSE	High	Master Protein	P02786	Transferrin receptor protein 1 [OS=Homo sapiens]	0	43.793	14	8	84	8	760	84.8	6.61	168.7	8	0	0	1.515	0.31019	106.25	86.5	113.5	67.34	58.69	High	High	High	High	High	High	High	High	High	High	1
FALSE	High	Master Protein	Q13310	Polyadenylate-binding protein 4 [OS=Homo sapiens]	0	43.707	16	7	30	3	644	70.7	9.26	105.98	7	0	0	1.987	0.103021	101.33	2	198	192.49	72.6	Not Found	Peak Found	Peak Found	High	High	Peak Found	High	High	Peak Found	High	1
FALSE	High	Master Protein	O95433	Activator of 90 kDa heat shock protein ATPase homolog 1 [OS=Homo sapiens]	0	43.699	36	7	87	7	338	38.3	5.53	319.64	7	0	0	0.754	0.738216	82.49	116.2	83.8	34.07	25.37	High	High	High	High	High	High	High	High	High	High	1
FALSE	High	Master Protein	Q6PI48	Aspartate--tRNA ligase, mitochondrial [OS=Homo sapiens]	0	43.68	19	8	61	8	645	73.5	8.02	131.31	8	0	0	0.967	0.925469	113.81	122.3	77.7	40.23	57.28	High	High	High	High	High	High	High	High	High	High	1
FALSE	High	Master Protein	Q9UHQ9	NADH-cytochrome b5 reductase 1 [OS=Homo sapiens]	0	43.627	32	6	81	6	305	34.1	9.38	265.31	6	0	0	1.073	0.834191	77.09	110.6	89.4	35.53	73.31	High	High	High	High	High	High	High	High	High	High	1
FALSE	High	Master Protein	Q14566	DNA replication licensing factor MCM6 [OS=Homo sapiens]	0	43.458	14	6	56	6	821	92.8	5.41	166.6	6	0	0	1.266	0.705358	101.7	79.2	120.8	138.15	18.12	High	High	High	High	High	High	High	High	High	High	1	Acetyl [N-Term]
FALSE	High	Master Protein	P43490	Nicotinamide phosphoribosyltransferase [OS=Homo sapiens]	0	43.357	27	7	51	7	491	55.5	7.15	138.85	7	0	0	1.236	0.6258	115.63	116	84	78.64	74.79	Peak Found	High	High	High	High	High	High	High	High	High	1
FALSE	High	Master Protein	O75131	Copine-3 [OS=Homo sapiens]	0	43.287	25	8	41	7	537	60.1	5.85	117.8	8	0	1	0.548	0.15954	86	113.3	86.7	29.61	38.42	High	High	High	High	High	High	High	High	High	High	1
FALSE	High	Master Protein	P06756	Integrin alpha-V [OS=Homo sapiens]	0	43.244	12	9	69	9	1048	116	5.68	168.49	9	0	0	0.475	0.290445	103.18	116.9	83.1	56.38	42.19	High	High	High	High	High	High	High	High	High	High	1
FALSE	High	Master Protein	P42126	Enoyl-CoA delta isomerase 1, mitochondrial [OS=Homo sapiens]	0	43.209	30	5	59	5	302	32.8	8.54	202.5	5	0	0	0.843	0.912253	68.53	92.4	107.6	22.4	28.29	High	High	High	High	High	High	High	High	High	High	1
FALSE	High	Master Protein	P10155	RNA-binding protein RO60 [OS=Homo sapiens]	0	43.183	20	7	71	7	538	60.6	8.03	221.32	7	0	0	0.926	0.9973	72.35	89.2	110.8	78.18	14.63	Peak Found	High	High	High	High	High	High	High	High	High	1
FALSE	High	Master Protein	Q9Y2D5	A-kinase anchor protein 2 [OS=Homo sapiens]	0	42.919	10	8	66	8	859	94.6	5.11	161.36	8	0	0	0.708	0.75487	90.01	119.7	80.3	33.08	28.35	High	High	High	High	High	High	High	High	High	High	1
FALSE	High	Master Protein	P04899	Guanine nucleotide-binding protein G(i) subunit alpha-2 [OS=Homo sapiens]	0	42.743	35	9	40	5	355	40.4	5.54	91.34	9	0	4	1.011	0.89389	132.14	120.4	79.6	21.32	117.77	Peak Found	High	High	High	Peak Found	Peak Found	High	High	High	Not Found	1
FALSE	High	Master Protein	Q9H2G2	STE20-like serine/threonine-protein kinase [OS=Homo sapiens]	0	42.741	15	9	31	9	1235	142.6	5.15	56.45	9	0	0	0.88	0.980195	116.31	91.1	108.9	101.01	60.36	High	High	High	High	High	High	Peak Found	High	High	High	1
FALSE	High	Master Protein	Q15165	Serum paraoxonase/arylesterase 2 [OS=Homo sapiens]	0	42.646	38	6	34	6	354	39.4	5.6	102.6	6	0	0	1.025	0.865826	74.24	94.2	105.8	33.67	54.12	Not Found	High	High	High	High	High	High	High	High	High	1
FALSE	High	Master Protein	P08134	Rho-related GTP-binding protein RhoC [OS=Homo sapiens]	0	42.35	42	5	105	1	193	22	6.58	221.26	5	0	5	0.943	0.981047	94.57	106.6	93.4	44.95	27.02	Not Found	Peak Found	High	Not Found	Not Found	Peak Found	Peak Found	Peak Found	Not Found	Not Found	1
FALSE	High	Master Protein	Q96FW1	Ubiquitin thioesterase OTUB1 [OS=Homo sapiens]	0	42.278	36	8	88	8	271	31.3	4.94	160.92	8	0	0	0.862	0.932413	116.57	89.4	110.6	58.17	53.06	High	High	High	High	High	High	High	High	High	High	1
FALSE	High	Master Protein	P58107	Epiplakin [OS=Homo sapiens]	0	41.977	10	8	32	6	5088	555.3	5.62	66.7	8	0	0	0.781	0.926687	98.59	4.2	195.8	109.74	104.17	Not Found	High	High	Peak Found	High	Peak Found	Peak Found	High	Not Found	High	1
FALSE	High	Master Protein	Q9H9B4	Sideroflexin-1 [OS=Homo sapiens]	0	41.94	36	8	31	7	322	35.6	9.07	71.21	8	0	1	1.276	0.481799	102.34	99	101	64.72	21.59	Peak Found	High	High	High	High	Peak Found	Peak Found	High	High	Peak Found	1
FALSE	High	Master Protein	Q9P0V9	Septin-10 [OS=Homo sapiens]	0	41.919	26	6	60	5	454	52.6	6.8	168.41	6	0	1	1.026	0.894296	126.92	95.3	104.7	40.74	82.27	Peak Found	High	High	High	High	Not Found	High	High	High	High	1
FALSE	High	Master Protein	P27635	60S ribosomal protein L10 [OS=Homo sapiens]	0	41.881	25	4	49	4	214	24.6	10.08	119.22	4	0	0	0.946	0.977232	115.87	103.3	96.7	34.34	64.49	High	High	High	High	High	High	High	High	High	High	1
FALSE	High	Master Protein	Q96HE7	ERO1-like protein alpha [OS=Homo sapiens]	0	41.792	29	9	30	9	468	54.4	5.68	66.45	9	0	0	0.862	0.966267	71.98	100.2	99.8	25.99	41.67	Not Found	High	High	High	High	High	High	High	High	High	1
FALSE	High	Master Protein	P55060	Exportin-2 [OS=Homo sapiens]	0	41.666	15	8	27	8	971	110.3	5.77	62.07	8	0	0	0.724	0.671358	104.34	166.2	33.8	67.66	74.05	Peak Found	High	High	High	High	High	High	High	High	High	1
FALSE	High	Master Protein	P11310	Medium-chain specific acyl-CoA dehydrogenase, mitochondrial [OS=Homo sapiens]	0	41.645	21	7	211	7	421	46.6	8.37	687.13	7	0	0	0.892	0.966267	76.91	96.2	103.8	32.37	33.47	High	High	High	High	High	High	High	High	High	High	1
FALSE	High	Master Protein	Q9NVE7	4'-phosphopantetheine phosphatase [OS=Homo sapiens]	0	41.599	20	10	32	10	773	85.9	6.28	76.57	10	0	0	0.584	0.596545	131.01	95.4	104.6	28.35	79.45	High	High	High	High	High	Peak Found	High	High	High	High	1
FALSE	High	Master Protein	Q14192	Four and a half LIM domains protein 2 [OS=Homo sapiens]	0	41.449	24	4	140	4	279	32.2	7.55	352.18	4	0	0	0.639	0.416597	84.33	98.5	101.5	38.67	57.61	High	High	High	High	High	High	High	High	High	High	1
FALSE	High	Master Protein	Q7L2H7	Eukaryotic translation initiation factor 3 subunit M [OS=Homo sapiens]	0	41.389	38	7	84	7	374	42.5	5.63	214.35	7	0	0	0.743	0.845412	76.37	112.6	87.4	18.2	17.09	High	High	High	High	High	High	High	High	High	High	1
FALSE	High	Master Protein	Q9Y2Q3	Glutathione S-transferase kappa 1 [OS=Homo sapiens]	0	41.208	36	6	47	6	226	25.5	8.41	120.89	6	0	0	1.274	0.507596	87.19	104	96	61.18	16.78	Peak Found	High	High	High	High	High	High	High	High	High	1
FALSE	High	Master Protein	P47897	Glutamine--tRNA ligase [OS=Homo sapiens]	0	41.129	17	8	36	8	775	87.7	7.15	85.32	8	0	0	1.893	0.200562	74.72	74.8	125.2	57.76	27.9	Peak Found	High	High	High	High	High	High	High	High	High	1
FALSE	High	Master Protein	Q00688	Peptidyl-prolyl cis-trans isomerase FKBP3 [OS=Homo sapiens]	0	40.955	24	4	81	4	224	25.2	9.28	273.95	4	0	0	1.847	0.037347	117.77	83	117	91.57	47.98	Peak Found	High	High	High	High	High	High	High	High	High	1
FALSE	High	Master Protein	Q9UN36	Protein NDRG2 [OS=Homo sapiens]	0	40.781	41	8	43	8	371	40.8	5.21	116.44	8	0	0	0.913	0.988239	110.21	112	88	25.55	46.81	High	High	High	High	High	High	High	High	High	High	1
FALSE	High	Master Protein	P26196	Probable ATP-dependent RNA helicase DDX6 [OS=Homo sapiens]	0	40.648	20	7	36	7	483	54.4	8.66	85.94	7	0	0	0.885	0.987729	105.37	108.9	91.1	77.89	68.94	High	High	High	High	High	High	High	High	High	High	1
FALSE	High	Master Protein	P50461	Cysteine and glycine-rich protein 3 [OS=Homo sapiens]	0	40.641	49	6	164	6	194	21	8.54	433.39	6	0	0	1.032	0.888416	107.37	90.4	109.6	88.99	104.45	High	High	High	High	High	High	High	High	High	High	1
FALSE	High	Master Protein	O75964	ATP synthase subunit g, mitochondrial [OS=Homo sapiens]	0	40.547	48	4	60	4	103	11.4	9.64	215.05	4	0	0	1.352	0.537142	145.35	118.9	81.1	44.05	66.21	High	High	High	High	High	High	High	High	High	High	1
FALSE	High	Master Protein	Q99714	3-hydroxyacyl-CoA dehydrogenase type-2 [OS=Homo sapiens]	0	40.491	36	5	95	5	261	26.9	7.78	275.81	5	0	0	1.248	0.547141	116.91	91.8	108.2	55.45	65.28	High	High	High	High	High	High	High	High	High	High	1
FALSE	High	Master Protein	Q8IUG5	Unconventional myosin-XVIIIb [OS=Homo sapiens]	0	40.466	6	9	29	9	2567	285	6.86	75.14	9	0	0	0.969	0.92488	84.22	60.1	139.9	66.36	53.37	Peak Found	High	High	High	High	High	High	High	High	High	1
FALSE	High	Master Protein	P39656	Dolichyl-diphosphooligosaccharide--protein glycosyltransferase 48 kDa subunit [OS=Homo sapiens]	0	40.433	22	6	102	6	456	50.8	6.55	262.39	6	0	0	0.962	0.960172	91.06	118	82	81.85	15	Peak Found	High	High	High	High	High	High	High	High	High	1
FALSE	High	Master Protein	Q12931	Heat shock protein 75 kDa, mitochondrial [OS=Homo sapiens]	0	40.241	19	10	49	9	704	80.1	8.21	106.91	10	0	0	1.237	0.671358	119.09	93.7	106.3	54.94	51.76	Not Found	High	High	High	High	High	High	High	High	High	1
FALSE	High	Master Protein	P61163	Alpha-centractin [OS=Homo sapiens]	0	40.212	28	6	123	4	376	42.6	6.64	324.11	6	0	3	0.657	0.464961	80.81	107.6	92.4	39.54	25.11	High	High	High	High	High	High	High	High	High	High	1
FALSE	High	Master Protein	Q9H7Z7	Prostaglandin E synthase 2 [OS=Homo sapiens]	0	40.201	25	7	50	7	377	41.9	9.16	167.5	7	0	0	1.004	0.919844	93.03	96.8	103.2	75.43	60.68	High	High	High	High	High	High	High	High	High	High	1
FALSE	High	Master Protein	P15259	Phosphoglycerate mutase 2 [OS=Homo sapiens]	0	40.101	30	5	114	4	253	28.7	8.88	311.32	5	0	0	1.398	0.33065	108.43	83.8	116.2	64.3	41.98	Peak Found	High	High	High	High	High	High	High	High	High	1
FALSE	High	Master Protein	Q9UNS2	COP9 signalosome complex subunit 3 [OS=Homo sapiens]	0	40.075	22	5	28	5	423	47.8	6.65	95.64	5	0	0	1.258	0.53448	137.99	89.6	110.4	29.17	61.06	High	High	High	High	High	High	High	High	High	High	1
FALSE	High	Master Protein	O00571	ATP-dependent RNA helicase DDX3X [OS=Homo sapiens]	0	39.86	19	9	34	8	662	73.2	7.18	76.87	9	0	0	1.235	0.671358	72.92	94.8	105.2	31.68	52.79	Not Found	High	High	Peak Found	High	High	High	High	High	High	1
FALSE	High	Master Protein	Q9BT78	COP9 signalosome complex subunit 4 [OS=Homo sapiens]	0	39.811	23	6	36	6	406	46.2	5.83	108.31	6	0	0	0.677	0.52769	104.24	50.3	149.7	49.85	26.04	Peak Found	High	High	High	High	High	High	High	High	High	1
FALSE	High	Master Protein	P30837	Aldehyde dehydrogenase X, mitochondrial [OS=Homo sapiens]	0	39.788	26	8	43	8	517	57.2	6.99	99.89	8	0	0	0.797	0.834191	81.55	124.7	75.3	72.46	55.54	High	High	High	High	High	High	High	High	Peak Found	High	1
FALSE	High	Master Protein	P55822	SH3 domain-binding glutamic acid-rich protein [OS=Homo sapiens]	0	39.68	23	4	123	4	239	26.1	4.15	273.31	4	0	0	0.675	0.851268	123.24	119.7	80.3	72.12	108.51	Peak Found	High	High	High	High	High	High	High	High	High	1
FALSE	High	Master Protein	Q9UNF1	Melanoma-associated antigen D2 [OS=Homo sapiens]	0	39.676	15	5	34	5	606	64.9	9.32	114.63	5	0	0	0.7	0.594266	84.36	118.9	81.1	72.12	45.49	High	High	High	High	Peak Found	Peak Found	High	High	High	High	1
FALSE	High	Master Protein	P49821	NADH dehydrogenase [ubiquinone] flavoprotein 1, mitochondrial [OS=Homo sapiens]	0	39.674	19	6	49	6	464	50.8	8.21	113.56	6	0	0	1.232	0.673006	116.81	54	146	87.95	42.87	High	High	High	High	High	High	High	High	High	High	1
FALSE	High	Master Protein	Q09028	Histone-binding protein RBBP4 [OS=Homo sapiens]	0	39.63	34	6	29	4	425	47.6	4.89	93.45	6	0	2	1.154	0.671358	112.87	112.9	87.1	46.85	49.24	Not Found	High	High	High	High	High	High	High	High	High	1
FALSE	High	Master Protein	Q9NQW7	Xaa-Pro aminopeptidase 1 [OS=Homo sapiens]	0	39.612	21	8	43	8	623	69.9	5.67	109.65	8	0	0	1.159	0.726672	109.82	120.4	79.6	73.68	52.41	Peak Found	High	High	High	High	High	High	High	High	High	1
FALSE	High	Master Protein	P05198	Eukaryotic translation initiation factor 2 subunit 1 [OS=Homo sapiens]	0	39.577	21	6	67	6	315	36.1	5.08	179.56	6	0	0	0.506	0.198327	85.93	140.3	59.7	44.58	71.45	High	High	High	High	High	High	High	High	High	High	1
FALSE	High	Master Protein	Q92947	Glutaryl-CoA dehydrogenase, mitochondrial [OS=Homo sapiens]	0	39.569	29	6	19	6	438	48.1	8.06	53.68	6	0	0	1.429	0.584679	133.97	47.2	152.8	107.87	64.29	Not Found	High	High	High	High	Not Found	High	High	High	High	1
FALSE	High	Master Protein	P11047	Laminin subunit gamma-1 [OS=Homo sapiens]	0	39.564	10	8	24	8	1609	177.5	5.12	43.97	8	0	0	0.748	0.921608	120.7	128	72	40.66	58.47	High	High	High	High	Peak Found	High	High	High	High	High	1
FALSE	High	Master Protein	P62873	Guanine nucleotide-binding protein G(I)/G(S)/G(T) subunit beta-1 [OS=Homo sapiens]	0	39.557	31	5	65	4	340	37.4	6	203.06	5	0	1	1.154	0.709286	103.94	86.2	113.8	25.13	47.36	High	High	High	High	High	High	High	High	High	High	1
FALSE	High	Master Protein	P50213	Isocitrate dehydrogenase [NAD] subunit alpha, mitochondrial [OS=Homo sapiens]	0	39.509	27	8	109	8	366	39.6	6.92	240.29	8	0	0	0.883	0.955513	105.06	93.8	106.2	42.4	42.37	High	High	High	Peak Found	High	Peak Found	High	High	High	High	1
FALSE	High	Master Protein	Q93009	Ubiquitin carboxyl-terminal hydrolase 7 [OS=Homo sapiens]	0	39.481	14	8	36	8	1102	128.2	5.55	74.33	8	0	0	1.136	0.780427	96.6	74.1	125.9	68.8	46.12	Not Found	High	High	High	High	High	High	High	High	High	1
FALSE	High	Master Protein	Q16795	NADH dehydrogenase [ubiquinone] 1 alpha subcomplex subunit 9, mitochondrial [OS=Homo sapiens]	0	39.466	27	7	54	7	377	42.5	9.8	125.46	7	0	0	1.503	0.208493	81.77	80.6	119.4	45.32	20.77	High	High	High	High	High	High	High	High	High	High	1
FALSE	High	Master Protein	P07339	Cathepsin D [OS=Homo sapiens]	0	39.405	20	5	159	5	412	44.5	6.54	408.18	5	0	0	0.506	0.0855948	104.83	178.1	21.9	56.35	32.3	High	High	High	High	High	High	High	High	High	High	1
FALSE	High	Master Protein	P53634	Dipeptidyl peptidase 1 [OS=Homo sapiens]	0	39.304	21	5	149	5	463	51.8	6.99	356.53	5	0	0	1.07	0.831092	97.3	117.7	82.3	79.43	84.96	High	High	High	High	High	High	High	High	High	High	1
FALSE	High	Master Protein	O60763	General vesicular transport factor p115 [OS=Homo sapiens]	0	39.291	11	7	77	7	962	107.8	4.91	184.05	7	0	0	0.569	0.577544	115.5	119.9	80.1	71.4	59.25	Not Found	High	High	High	High	High	High	High	High	High	1
FALSE	High	Master Protein	Q99733	Nucleosome assembly protein 1-like 4 [OS=Homo sapiens]	0	39.253	30	6	55	6	375	42.8	4.69	166.4	6	0	0	1.37	0.369575	102.96	94.4	105.6	40.89	39.52	High	High	High	High	High	High	High	High	High	High	1
FALSE	High	Master Protein	P26599	Polypyrimidine tract-binding protein 1 [OS=Homo sapiens]	0	39.237	25	6	21	6	531	57.2	9.17	70.49	6	0	0	0.747	0.847489	115.64	107	93	95.2	81.34	High	High	High	High	High	High	High	High	High	High	1
FALSE	High	Master Protein	P07951	Tropomyosin beta chain [OS=Homo sapiens]	0	39.161	29	11	120	4	284	32.8	4.7	229.15	11	0	0	0.746	0.9473	110.26	101.5	98.5	33.89	131.36	Not Found	High	High	High	High	Not Found	High	High	High	High	1
FALSE	High	Master Protein	P56192	Methionine--tRNA ligase, cytoplasmic [OS=Homo sapiens]	0	39.123	15	7	37	7	900	101.1	6.16	105.24	7	0	0	0.596	0.362202	75.91	131.7	68.3	27.05	11.77	Peak Found	High	High	High	High	High	High	High	High	High	1
FALSE	High	Master Protein	P62987	Ubiquitin-60S ribosomal protein L40 [OS=Homo sapiens]	0	38.722	52	7	73	7	128	14.7	9.83	135.86	7	0	0	1.16	0.74681	117.82	145	55	70.34	138.33	Peak Found	High	High	High	High	High	High	High	High	High	1
FALSE	High	Master Protein	P47985	Cytochrome b-c1 complex subunit Rieske, mitochondrial [OS=Homo sapiens]	0	38.612	46	7	71	2	274	29.6	8.32	184.69	7	0	5	0.628	0.379957	82.3	116.5	83.5	49.11	46.49	Peak Found	High	High	High	High	High	High	High	High	High	1
FALSE	High	Master Protein	O60506	Heterogeneous nuclear ribonucleoprotein Q [OS=Homo sapiens]	0	38.585	23	9	43	6	623	69.6	8.59	106.43	9	0	0	0.782	0.958863	124.37	141	59	65.48	59.01	Peak Found	High	High	High	High	Peak Found	High	High	High	High	1
FALSE	High	Master Protein	P15170	Eukaryotic peptide chain release factor GTP-binding subunit ERF3A [OS=Homo sapiens]	0	38.56	21	7	69	3	499	55.7	5.62	150.46	7	0	4	0.532	0.127693	116.77	155.6	44.4	59.31	72.95	Not Found	High	High	High	High	Peak Found	High	High	High	High	1
FALSE	High	Master Protein	Q15149	Plectin [OS=Homo sapiens]	0	38.514	4	10	32	8	4684	531.5	5.96	72.89	10	0	2	1.11	0.825043	92.26	133.4	66.6	72.76	59.8	Peak Found	Peak Found	High	High	Peak Found	Not Found	High	High	High	High	1
FALSE	High	Master Protein	Q5VYK3	Proteasome adapter and scaffold protein ECM29 [OS=Homo sapiens]	0	38.364	8	8	35	8	1845	204.2	7.12	94.81	8	0	0	0.657	0.825043	59.63	134.5	65.5	47.7	16.31	High	High	High	High	High	High	High	High	High	High	1
TRUE	High	Master Protein	P14543	Nidogen-1 [OS=Homo sapiens]	0	38.271	15	8	34	8	1247	136.3	5.29	96.36	8	0	0	0.241	2.68421e-06	138.75	185	15	76.42	98.65	High	High	High	High	High	Peak Found	High	High	High	High	1
FALSE	High	Master Protein	P09972	Fructose-bisphosphate aldolase C [OS=Homo sapiens]	0	38.203	36	8	80	6	364	39.4	6.87	222.56	8	0	0	1.122	0.757939	63.01	106.3	93.7	59.12	46.11	Peak Found	High	High	High	High	High	High	High	High	High	1
FALSE	High	Master Protein	Q12955	Ankyrin-3 [OS=Homo sapiens]	0	37.916	3	8	18	7	4377	480.1	6.49	51.34	8	0	0	1.065	0.837589	84.06	86.9	113.1	24.94	50.16	Not Found	Peak Found	Peak Found	High	High	High	High	High	High	High	1
FALSE	High	Master Protein	P52565	Rho GDP-dissociation inhibitor 1 [OS=Homo sapiens]	0	37.858	11	4	157	4	204	23.2	5.11	431.11	4	0	0	0.676	0.523965	73.59	115.4	84.6	81.93	32.45	Peak Found	High	High	High	High	High	High	High	High	High	1
TRUE	High	Master Protein	P23327	Sarcoplasmic reticulum histidine-rich calcium-binding protein [OS=Homo sapiens]	0	37.781	18	4	27	4	699	80.2	4.72	47.66	4	0	0	0.281	0.102083	137.89	174.1	25.9	71.13	164.29	Not Found	High	High	Peak Found	Not Found	Not Found	High	High	High	High	1
FALSE	High	Master Protein	P05388	60S acidic ribosomal protein P0 [OS=Homo sapiens]	0	37.771	28	7	124	7	317	34.3	5.97	341.18	7	0	0	1.295	0.474478	71.1	66.5	133.5	52.94	36	Peak Found	High	High	High	High	Peak Found	High	High	High	High	1
FALSE	High	Master Protein	Q6ZP82	Coiled-coil domain-containing protein 141 [OS=Homo sapiens]	0	37.736	9	9	40	9	1450	166.2	5.58	87.07	9	0	0	0.921	0.975833	77.47	109.9	90.1	15.55	17.13	High	High	High	High	High	High	High	High	High	High	1
FALSE	High	Master Protein	P05141	ADP/ATP translocase 2 [OS=Homo sapiens]	0	37.71	28	8	117	4	298	32.8	9.69	253.37	8	0	0	1.239	0.539405	79.01	89.2	110.8	66.21	37.24	High	High	High	High	Peak Found	High	High	High	High	High	1
FALSE	High	Master Protein	P17612	cAMP-dependent protein kinase catalytic subunit alpha [OS=Homo sapiens]	0	37.696	26	4	44	4	351	40.6	8.79	174.08	4	0	0	0.704	0.609793	121.49	104.4	95.6	84.83	110.77	High	High	High	High	High	High	High	High	High	High	1
FALSE	High	Master Protein	Q8WUM4	Programmed cell death 6-interacting protein [OS=Homo sapiens]	0	37.675	18	10	23	10	868	96	6.52	60.22	10	0	0	0.497	0.397898	119.73	103.2	96.8	100.4	11.38	Peak Found	High	High	High	High	High	High	High	High	High	1
FALSE	High	Master Protein	Q14108	Lysosome membrane protein 2 [OS=Homo sapiens]	0	37.658	32	8	31	8	478	54.3	5.14	99.96	8	0	0	0.747	0.722924	90.64	117	83	44.89	39.59	Not Found	High	High	High	High	High	High	High	High	High	1
FALSE	High	Master Protein	Q9NY33	Dipeptidyl peptidase 3 [OS=Homo sapiens]	0	37.629	21	7	41	7	737	82.5	5.1	99.15	7	0	0	0.916	0.984978	91.06	114.8	85.2	59.47	47.74	Peak Found	High	High	High	High	High	High	High	High	High	1
FALSE	High	Master Protein	P61158	Actin-related protein 3 [OS=Homo sapiens]	0	37.616	35	9	84	9	418	47.3	5.88	173.65	9	0	0	0.712	0.631311	89.36	93	107	64.4	47.02	High	High	High	High	High	High	High	High	High	High	1
FALSE	High	Master Protein	P54296	Myomesin-2 [OS=Homo sapiens]	0	37.513	8	7	25	7	1465	164.8	6.19	61.43	7	0	0	0.551	0.704469	104.87	154.6	45.4	23.18	46.62	Not Found	High	High	Peak Found	High	High	High	High	High	High	1
FALSE	High	Master Protein	Q0ZGT2	Nexilin [OS=Homo sapiens]	0	37.493	12	6	82	6	675	80.6	5.33	244.85	6	0	0	1.256	0.535163	88.8	73.1	126.9	41.43	77.8	Not Found	High	High	High	High	High	High	High	High	High	1
FALSE	High	Master Protein	P12268	Inosine-5'-monophosphate dehydrogenase 2 [OS=Homo sapiens]	0	37.459	26	6	51	6	514	55.8	6.9	129	6	0	0	0.504	0.577544	119.05	97.7	102.3	90.72	62.44	High	High	High	High	High	High	High	High	High	High	1
FALSE	High	Master Protein	P11532	Dystrophin [OS=Homo sapiens]	0	37.381	5	11	23	11	3685	426.5	5.88	47.48	11	0	0	1.35	0.58606	58.85	74.5	125.5	17.75	56.08	High	High	High	High	High	High	High	High	High	High	1
FALSE	High	Master Protein	P50570	Dynamin-2 [OS=Homo sapiens]	0	37.314	14	8	36	8	870	98	7.44	97.74	8	0	0	0.97	0.938988	68.13	106.9	93.1	53.89	53.88	High	High	High	High	High	High	High	High	High	High	1
FALSE	High	Master Protein	Q9Y2D4	Exocyst complex component 6B [OS=Homo sapiens]	0	37.267	7	3	31	3	811	94.1	6.46	110.05	3	0	0	0.728	0.955443	70.55	114.6	85.4	78.72	77.43	Peak Found	High	High	High	High	High	High	High	High	High	1
FALSE	High	Master Protein	Q9HCC0	Methylcrotonoyl-CoA carboxylase beta chain, mitochondrial [OS=Homo sapiens]	0	37.24	21	7	36	7	563	61.3	7.68	93.58	7	0	0	1.129	0.818934	130.66	140.7	59.3	156.51	55.59	Peak Found	High	High	High	High	High	High	High	High	High	1
FALSE	High	Master Protein	O75663	TIP41-like protein [OS=Homo sapiens]	0	37.205	32	4	56	4	272	31.4	5.91	162.17	4	0	0	1.286	0.488121	44.13	84.2	115.8	40.96	30.56	Peak Found	High	High	High	High	High	High	High	High	High	1
FALSE	High	Master Protein	Q9Y3I0	RNA-splicing ligase RtcB homolog [OS=Homo sapiens]	0	37.184	20	6	45	6	505	55.2	7.23	117.7	6	0	0	0.625	0.372339	112.03	113.2	86.8	34.87	60.31	High	High	High	High	High	High	High	High	High	High	1
FALSE	High	Master Protein	Q9UHY1	Nuclear receptor-binding protein [OS=Homo sapiens]	0	37.183	13	4	40	4	535	59.8	5.08	120.25	4	0	0	0.854	0.923486	63.98	120.6	79.4	51.45	32.58	Peak Found	High	High	High	High	High	High	High	High	High	1
FALSE	High	Master Protein	P28066	Proteasome subunit alpha type-5 [OS=Homo sapiens]	0	37.097	41	5	63	5	241	26.4	4.79	190.78	5	0	0	1.644	0.10708	117.58	66.7	133.3	80.23	116.17	Peak Found	High	High	High	High	High	High	High	High	High	1
FALSE	High	Master Protein	Q13151	Heterogeneous nuclear ribonucleoprotein A0 [OS=Homo sapiens]	0	37.064	24	4	135	4	305	30.8	9.29	387.02	4	0	0	0.663	0.482097	94.29	94.6	105.4	60.74	41.61	High	High	High	High	High	High	High	High	High	High	1
FALSE	High	Master Protein	Q9NTK5	Obg-like ATPase 1 [OS=Homo sapiens]	0	36.92	32	7	59	7	396	44.7	7.81	150.04	7	0	0	0.683	0.540249	71.1	121.6	78.4	50.57	30.79	High	High	High	High	High	High	High	High	High	High	1
FALSE	High	Master Protein	Q14008	Cytoskeleton-associated protein 5 [OS=Homo sapiens]	0	36.842	6	8	25	8	2032	225.4	7.8	75.65	8	0	0	1.348	0.476835	86.42	99.7	100.3	58.47	55.68	High	High	Peak Found	High	High	High	High	High	High	High	1
FALSE	High	Master Protein	P50502	Hsc70-interacting protein [OS=Homo sapiens]	0	36.812	22	5	58	5	369	41.3	5.27	128.49	5	0	0	1.035	0.884129	70.43	106.2	93.8	25.06	27.23	High	High	High	High	High	High	High	High	High	High	1
FALSE	High	Master Protein	O75147	Obscurin-like protein 1 [OS=Homo sapiens]	0	36.747	7	8	29	8	1896	206.8	5.63	74.33	8	0	0	0.867	0.996579	135.79	109.2	90.8	104.48	75.32	High	Peak Found	High	High	High	High	High	High	High	High	1
FALSE	High	Master Protein	Q6NZI2	Caveolae-associated protein 1 [OS=Homo sapiens]	0	36.704	18	5	97	5	390	43.5	5.6	243.17	5	0	0	0.674	0.786671	137.4	117.1	82.9	53.88	167.05	High	High	High	High	High	High	High	High	High	High	1
FALSE	High	Master Protein	P35556	Fibrillin-2 [OS=Homo sapiens]	0	36.699	6	8	40	8	2912	314.6	4.86	78.7	8	0	0	0.619	0.855715	104.9	111.1	88.9	101.29	57.88	High	High	High	High	High	High	High	High	High	Peak Found	1
FALSE	High	Master Protein	P17655	Calpain-2 catalytic subunit [OS=Homo sapiens]	0	36.652	21	9	42	9	700	79.9	4.98	105.03	9	0	0	0.75	0.88183	106.53	75.3	124.7	62.16	78.09	High	High	High	High	High	High	High	High	High	High	1
FALSE	High	Master Protein	Q96I99	Succinate--CoA ligase [GDP-forming] subunit beta, mitochondrial [OS=Homo sapiens]	0	36.482	24	7	83	7	432	46.5	6.39	182.1	7	0	0	1.352	0.357949	99.74	78.8	121.2	58.39	40.73	Peak Found	High	High	High	High	High	High	High	High	High	1
FALSE	High	Master Protein	P13637	Sodium/potassium-transporting ATPase subunit alpha-3 [OS=Homo sapiens]	0	36.417	8	6	65	1	1013	111.7	5.38	181.66	6	0	0	0.333	0.192405	46.18	152.7	47.3	37.82	40.74	Peak Found	High	High	High	High	Not Found	High	Peak Found	Not Found	High	1
FALSE	High	Master Protein	P68036	Ubiquitin-conjugating enzyme E2 L3 [OS=Homo sapiens]	0	36.366	58	5	38	5	154	17.9	8.51	126.17	5	0	0	0.779	0.800621	81.42	90.1	109.9	51.96	55.08	High	High	High	High	High	High	High	High	High	High	1
FALSE	High	Master Protein	P49419	Alpha-aminoadipic semialdehyde dehydrogenase [OS=Homo sapiens]	0	36.169	25	8	74	8	539	58.5	7.99	192.94	8	0	0	0.713	0.846739	131.48	152.8	47.2	30.28	106.62	Not Found	High	High	High	High	High	High	High	High	High	1
FALSE	High	Master Protein	Q5JRX3	Presequence protease, mitochondrial [OS=Homo sapiens]	0	36.154	12	6	22	6	1037	117.3	6.92	69.32	6	0	0	0.985	0.924788	81.26	117.3	82.7	31.55	37.3	Not Found	High	High	High	High	High	High	Peak Found	High	High	1
FALSE	High	Master Protein	Q13424	Alpha-1-syntrophin [OS=Homo sapiens]	0	36.14	18	5	25	5	505	53.9	6.8	85.89	5	0	0	0.578	0.233567	137.36	182.5	17.5	66.69	24.92	Peak Found	High	High	High	High	High	High	High	High	High	1
FALSE	High	Master Protein	P68400	Casein kinase II subunit alpha [OS=Homo sapiens]	0	36.064	23	5	54	5	391	45.1	7.74	153.89	5	0	0	1.006	0.918606	138.62	85.1	114.9	51.67	38.53	High	High	High	High	High	High	High	High	High	High	1
FALSE	High	Master Protein	P00568	Adenylate kinase isoenzyme 1 [OS=Homo sapiens]	0	35.937	35	5	108	5	194	21.6	8.63	365.81	5	0	0	0.946	0.977592	93.67	101.5	98.5	30.94	55.52	High	High	High	High	High	High	High	High	High	High	1
FALSE	High	Master Protein	Q99623	Prohibitin-2 [OS=Homo sapiens]	0	35.902	29	7	70	7	299	33.3	9.83	171.17	7	0	0	1.198	0.637948	89.37	85.4	114.6	33	25.8	High	High	High	High	High	High	High	High	High	High	1
FALSE	High	Master Protein	Q9UEY8	Gamma-adducin [OS=Homo sapiens]	0	35.884	16	6	23	6	706	79.1	6.32	58.46	6	0	0	1.151	0.739529	118.9	25.7	174.3	76.93	129.52	High	High	High	High	Peak Found	Peak Found	High	High	High	High	1
TRUE	High	Master Protein	P13647	Keratin, type II cytoskeletal 5 [OS=Homo sapiens]	0	35.864	15	9	169	6	590	62.3	7.74	407.73	9	0	0	23.377	5.5167e-17	90.01	58.4	141.6	111.27		Not Found	High	High	High	High	Not Found	Not Found	High	Not Found	Not Found	1
FALSE	High	Master Protein	Q15181	Inorganic pyrophosphatase [OS=Homo sapiens]	0	35.855	47	9	33	9	289	32.6	5.86	61.77	9	0	0	0.99	0.919398	83.89	88.2	111.8	33.38	40.66	High	High	High	High	High	High	High	High	High	High	1
TRUE	High	Master Protein	P19338	Nucleolin [OS=Homo sapiens]	0	35.824	12	7	63	7	710	76.6	4.7	139.92	7	0	0	2.098	0.0598484	116.8	164.4	35.6	113.85	117.64	High	High	High	High	High	High	High	High	High	High	1
FALSE	High	Master Protein	P51665	26S proteasome non-ATPase regulatory subunit 7 [OS=Homo sapiens]	0	35.691	28	6	68	6	324	37	6.77	240.33	6	0	0	0.775	0.791576	52.63	94.1	105.9	31.57	32.73	High	High	High	High	High	High	High	High	High	High	1
FALSE	High	Master Protein	O43815	Striatin [OS=Homo sapiens]	0	35.643	17	8	52	8	780	86.1	5.27	122.29	8	0	0	0.754	0.918299	112.17	106.5	93.5	56.54	63.27	High	High	High	High	High	High	High	High	High	High	1
FALSE	High	Master Protein	Q96HC4	PDZ and LIM domain protein 5 [OS=Homo sapiens]	0	35.593	16	6	59	6	596	63.9	8.21	144.64	6	0	0	1.041	0.870312	91.77	82.5	117.5	31.78	50.06	Peak Found	High	High	High	High	High	High	High	High	High	1
FALSE	High	Master Protein	O15382	Branched-chain-amino-acid aminotransferase, mitochondrial [OS=Homo sapiens]	0	35.568	21	6	58	6	392	44.3	8.65	133.29	6	0	0	0.949	0.975833	80.32	97.7	102.3	51.46	31.6	High	High	High	High	High	High	High	High	High	High	1
FALSE	High	Master Protein	O00468	Agrin [OS=Homo sapiens]	0	35.515	9	8	16	8	2068	217.2	6.39	33.86	8	0	0	0.531	0.831092	107.2	101.9	98.1	57.98	71.27	High	Peak Found	Peak Found	High	High	Not Found	Peak Found	High	High	High	1
FALSE	High	Master Protein	P30044	Peroxiredoxin-5, mitochondrial [OS=Homo sapiens]	0	35.499	53	7	98	7	214	22.1	8.7	250.91	7	0	0	1.361	0.381424	104.67	114.4	85.6	64.42	54.74	High	High	High	High	High	High	High	High	High	High	1
FALSE	High	Master Protein	Q9H3G5	Probable serine carboxypeptidase CPVL [OS=Homo sapiens]	0	35.478	19	6	30	6	476	54.1	5.62	89.42	6	0	0	1.085	0.820084	83.32	92.8	107.2	68.37	18.81	High	High	High	High	High	High	High	High	High	High	1
FALSE	High	Master Protein	P60981	Destrin [OS=Homo sapiens]	0	35.451	35	6	77	6	165	18.5	7.85	187.21	6	0	0	1.025	0.894987	100.69	93.8	106.2	56.85	27.07	High	High	High	High	High	High	High	High	High	High	1
FALSE	High	Master Protein	Q9BY32	Inosine triphosphate pyrophosphatase [OS=Homo sapiens]	0	35.448	52	5	25	5	194	21.4	5.66	70.93	5	0	0	0.695	0.871261	97	150.6	49.4	74.54	60.55	High	High	High	High	Peak Found	High	High	High	High	Peak Found	1
FALSE	High	Master Protein	P28070	Proteasome subunit beta type-4 [OS=Homo sapiens]	0	35.403	23	3	29	3	264	29.2	5.97	95.84	3	0	0	1.014	0.912253	105.97	74.9	125.1	48.05	72.85	High	High	High	High	High	High	High	High	High	High	1
FALSE	High	Master Protein	P51553	Isocitrate dehydrogenase [NAD] subunit gamma, mitochondrial [OS=Homo sapiens]	0	35.389	28	6	48	6	393	42.8	8.5	100.62	6	0	0	1.076	0.7982	105.83	101.9	98.1	63.56	87.22	High	High	High	High	High	Peak Found	High	High	High	High	1
FALSE	High	Master Protein	O75431	Metaxin-2 [OS=Homo sapiens]	0	35.291	26	4	55	4	263	29.7	6.29	168.66	4	0	0	0.988	0.93608	87.28	108.7	91.3	80.69	95.21	High	High	High	High	High	High	High	High	High	High	1
FALSE	High	Master Protein	Q9UQ80	Proliferation-associated protein 2G4 [OS=Homo sapiens]	0	35.018	23	5	56	5	394	43.8	6.55	143.06	5	0	0	0.727	0.672835	84.6	104.2	95.8	50.22	60.7	Peak Found	High	High	High	High	High	High	High	High	High	1
FALSE	High	Master Protein	P22234	Bifunctional phosphoribosylaminoimidazole carboxylase/phosphoribosylaminoimidazole succinocarboxamide synthetase [OS=Homo sapiens]	0	34.877	24	8	62	8	425	47	7.23	138.66	8	0	0	1.57	0.152683	112.11	77.9	122.1	50.29	98.53	Not Found	High	High	High	High	High	High	High	High	High	1
FALSE	High	Master Protein	P82650	28S ribosomal protein S22, mitochondrial [OS=Homo sapiens]	0	34.857	26	6	17	6	360	41.3	7.9	53.73	6	0	0	0.817	0.902038	85.27	130	70	56.47	55.9	High	High	High	High	High	Peak Found	Peak Found	High	High	High	1
FALSE	High	Master Protein	P36578	60S ribosomal protein L4 [OS=Homo sapiens]	0	34.81	21	8	67	8	427	47.7	11.06	131.11	8	0	0	0.671	0.546614	82.22	93.9	106.1	44.54	35.45	Not Found	High	High	High	High	Not Found	High	High	High	High	1
FALSE	High	Master Protein	O95302	Peptidyl-prolyl cis-trans isomerase FKBP9 [OS=Homo sapiens]	0	34.751	20	5	19	5	570	63	5.08	61.75	5	0	0	0.836	0.943918	66.93	113.6	86.4	30.06	59.24	Not Found	High	High	High	High	Peak Found	High	High	High	High	1
FALSE	High	Master Protein	P46777	60S ribosomal protein L5 [OS=Homo sapiens]	0	34.747	32	5	81	5	297	34.3	9.72	232.48	5	0	0	1.013	0.912863	103.32	74.9	125.1	79.18	35.12	Peak Found	High	High	High	High	High	High	High	High	High	1
FALSE	High	Master Protein	Q9BY67	Cell adhesion molecule 1 [OS=Homo sapiens]	0	34.709	16	3	26	3	442	48.5	5.07	90.35	3	0	0	1.301	0.535056	116.55	84.2	115.8	54.27	29.35	High	High	High	High	High	High	High	High	High	High	1
FALSE	High	Master Protein	Q16643	Drebrin [OS=Homo sapiens]	0	34.676	22	6	63	6	649	71.4	4.45	164.53	6	0	0	0.78	0.913792	131.73	123.7	76.3	82.06	74.3	High	High	High	High	High	High	High	High	High	High	1
FALSE	High	Master Protein	O60662	Kelch-like protein 41 [OS=Homo sapiens]	0	34.553	21	9	37	9	606	68	5.29	105.2	9	0	0	0.578	0.718985	100.56	97.5	102.5	134.35	85.76	Peak Found	High	High	High	High	Peak Found	High	High	High	High	1
FALSE	High	Master Protein	Q9UJZ1	Stomatin-like protein 2, mitochondrial [OS=Homo sapiens]	0	34.513	24	5	33	5	356	38.5	7.39	96.26	5	0	0	1.297	0.53448	104.34	104.6	95.4	48.69	46.72	High	High	High	High	High	High	High	High	High	High	1
FALSE	High	Master Protein	P25398	40S ribosomal protein S12 [OS=Homo sapiens]	0	34.437	39	5	144	5	132	14.5	7.21	460.08	5	0	0	1.567	0.154842	103.58	91.1	108.9	42.08	87.68	Not Found	High	High	High	High	High	High	High	High	High	1
TRUE	High	Master Protein	Q9NPH2	Inositol-3-phosphate synthase 1 [OS=Homo sapiens]	0	34.321	12	3	88	3	558	61	5.76	294.88	3	0	0	0.489	0.0639519	128.76	135	65	84.31	48.73	Peak Found	High	High	High	High	High	High	High	High	High	1
FALSE	High	Master Protein	P13693	Translationally-controlled tumor protein [OS=Homo sapiens]	0	34.304	44	4	251	4	172	19.6	4.93	684.67	4	0	0	0.999	0.924788	116.78	95.5	104.5	44.54	42.04	High	High	High	High	High	High	High	High	High	High	1
FALSE	High	Master Protein	O00231	26S proteasome non-ATPase regulatory subunit 11 [OS=Homo sapiens]	0	34.293	27	7	50	7	422	47.4	6.48	140.04	7	0	0	0.753	0.738216	64.26	115.4	84.6	67.8	18.06	Peak Found	High	High	High	High	High	High	High	High	High	1
FALSE	High	Master Protein	Q8TBC4	NEDD8-activating enzyme E1 catalytic subunit [OS=Homo sapiens]	0	34.161	25	6	48	6	463	51.8	5.45	134.88	6	0	0	0.845	0.938433	87.88	102	98	67.27	48.48	Peak Found	High	High	High	High	Peak Found	High	High	High	High	1
FALSE	High	Master Protein	P35606	Coatomer subunit beta' [OS=Homo sapiens]	0	34.158	14	8	86	8	906	102.4	5.27	190.68	8	0	0	0.794	0.862069	86.68	119.7	80.3	51.64	19.98	High	High	High	High	High	High	High	High	High	High	1
FALSE	High	Master Protein	P54646	5'-AMP-activated protein kinase catalytic subunit alpha-2 [OS=Homo sapiens]	0	34.125	18	7	29	5	552	62.3	7.75	73.02	7	0	2	1.16	0.735509	120.4	162.4	37.6	83.39	79.62	Peak Found	High	Peak Found	High	High	High	High	High	High	High	1
FALSE	High	Master Protein	Q8N474	Secreted frizzled-related protein 1 [OS=Homo sapiens]	0	34.109	38	7	60	7	314	35.4	8.85	169.79	7	0	0	0.755	0.840092	117.21	150.5	49.5	103.47	65.58	Not Found	High	High	High	High	High	High	High	High	High	1
FALSE	High	Master Protein	P21266	Glutathione S-transferase Mu 3 [OS=Homo sapiens]	0	34.087	38	8	41	8	225	26.5	5.54	108.34	8	0	0	0.619	0.350707	135.63	79.8	120.2	56.21	41.36	Not Found	High	High	High	High	High	High	High	High	High	1
FALSE	High	Master Protein	Q9UBC2	Epidermal growth factor receptor substrate 15-like 1 [OS=Homo sapiens]	0	34.08	15	7	28	7	864	94.2	5.11	78.37	7	0	0	1.062	0.840092	74.01	117.2	82.8	61.56	72.75	Peak Found	High	High	High	High	High	High	High	High	High	1
FALSE	High	Master Protein	Q06323	Proteasome activator complex subunit 1 [OS=Homo sapiens]	0	33.943	25	5	18	5	249	28.7	6.02	48.61	5	0	0	1.318	0.560634	80.18	117.3	82.7	54.67	107.09	Peak Found	High	Peak Found	High	High	Peak Found	High	High	High	High	1
FALSE	High	Master Protein	P21912	Succinate dehydrogenase [ubiquinone] iron-sulfur subunit, mitochondrial [OS=Homo sapiens]	0	33.862	29	5	54	5	280	31.6	8.76	135.11	5	0	0	0.66	0.474478	123.45	98.8	101.2	72.38	58.68	High	High	High	High	High	High	High	High	High	High	1
FALSE	High	Master Protein	Q9UGJ0	5'-AMP-activated protein kinase subunit gamma-2 [OS=Homo sapiens]	0	33.84	19	7	38	6	569	63	9.35	71.69	7	0	1	1.124	0.799229	100.29	50.8	149.2	42.28	40.55	Not Found	High	High	High	High	High	High	High	High	High	1
FALSE	High	Master Protein	Q99497	Parkinson disease protein 7 [OS=Homo sapiens]	0	33.754	44	5	75	5	189	19.9	6.79	278.99	5	0	0	1.717	0.0746184	78.74	88.3	111.7	55.93	42.49	High	High	High	High	High	High	High	High	High	High	1
FALSE	High	Master Protein	O00159	Unconventional myosin-Ic [OS=Homo sapiens]	0	33.731	12	9	26	8	1063	121.6	9.41	56.64	9	0	0	0.575	0.478438	81.56	109.2	90.8	61.14	96.27	Peak Found	High	High	Peak Found	High	Peak Found	Peak Found	High	High	High	1
FALSE	High	Master Protein	P19429	Troponin I, cardiac muscle [OS=Homo sapiens]	0	33.688	16	3	39	3	210	24	9.86	117.98	3	0	0	0.518	0.102943	119.82	110.7	89.3	57.08	73.65	High	High	High	High	High	High	High	High	High	High	1
FALSE	High	Master Protein	P28289	Tropomodulin-1 [OS=Homo sapiens]	0	33.593	30	6	72	6	359	40.5	5.1	212.43	6	0	0	1.255	0.537058	69.36	79.2	120.8	37.99	39.29	High	High	High	High	High	High	High	High	High	High	1
FALSE	High	Master Protein	Q96CW1	AP-2 complex subunit mu [OS=Homo sapiens]	0	33.545	19	4	53	4	435	49.6	9.54	113.61	4	0	0	0.889	0.98571	110.7	146.4	53.6	41.85	38.86	High	High	High	High	High	High	High	High	High	High	1
FALSE	High	Master Protein	P62701	40S ribosomal protein S4, X isoform [OS=Homo sapiens]	0	33.52	30	6	103	6	263	29.6	10.15	295.86	6	0	0	1.408	0.316444	100.08	82.2	117.8	56.73	27.12	High	High	High	High	High	High	High	High	High	High	1
FALSE	High	Master Protein	Q15046	Lysine--tRNA ligase [OS=Homo sapiens]	0	33.411	13	5	17	5	597	68	6.35	58.28	5	0	0	1.342	0.560429	109.74	63.7	136.3	125.19	73.65	Not Found	High	High	High	High	High	High	High	Peak Found	High	1
FALSE	High	Master Protein	P35611	Alpha-adducin [OS=Homo sapiens]	0	33.354	19	7	28	7	737	80.9	5.83	66.06	7	0	0	1.04	0.858348	77.35	122.4	77.6	50.7	75.26	High	High	High	High	High	High	High	High	High	High	1
FALSE	High	Master Protein	P22392	Nucleoside diphosphate kinase B [OS=Homo sapiens]	0	33.351	53	6	53	2	152	17.3	8.41	114.29	6	0	5	1.008	0.918254	127.27	130.2	69.8	128.44	54.17	High	High	High	High	High	High	High	High	High	High	1
FALSE	High	Master Protein	P02144	Myoglobin [OS=Homo sapiens]	0	33.287	30	4	68	4	154	17.2	7.68	196.46	4	0	0	1.225	0.587507	97.41	97.9	102.1	38.05	20.03	High	High	High	High	High	High	High	High	High	High	1
FALSE	High	Master Protein	O43390	Heterogeneous nuclear ribonucleoprotein R [OS=Homo sapiens]	0	33.207	20	9	45	6	633	70.9	8.13	106.41	9	0	3	0.788	0.924788	114.02	105.5	94.5	77.97	72.72	Not Found	High	High	High	High	Not Found	High	High	High	High	1
FALSE	High	Master Protein	P47756	F-actin-capping protein subunit beta [OS=Homo sapiens]	0	33.198	36	6	43	6	277	31.3	5.59	103.46	6	0	0	1.14	0.695423	85.3	87.6	112.4	50.76	29.21	High	High	High	High	High	High	High	High	High	High	1
FALSE	High	Master Protein	O14979	Heterogeneous nuclear ribonucleoprotein D-like [OS=Homo sapiens]	0	33.065	19	6	65	4	420	46.4	9.57	101.21	6	0	0	0.606	0.312343	125.34	150.8	49.2	30.68	104.26	High	High	High	High	High	Not Found	High	High	Peak Found	High	1
TRUE	High	Master Protein	O15372	Eukaryotic translation initiation factor 3 subunit H [OS=Homo sapiens]	0	33.023	21	5	53	5	352	39.9	6.54	125.58	5	0	0	0.283	4.8965e-05	122.85	168.4	31.6	48.67	26.01	High	High	High	High	High	High	High	High	High	High	1
FALSE	High	Master Protein	Q9UDR5	Alpha-aminoadipic semialdehyde synthase, mitochondrial [OS=Homo sapiens]	0	33.012	11	5	32	5	926	102.1	6.64	113.09	5	0	0	0.718	0.696846	101.53	130.4	69.6	41.08	65.2	High	High	High	High	High	High	High	High	High	High	1
FALSE	High	Master Protein	Q06124	Tyrosine-protein phosphatase non-receptor type 11 [OS=Homo sapiens]	0	32.971	14	5	38	5	593	68	7.3	96.59	5	0	0	1.276	0.613225	82.95	114.9	85.1	34.9	124.84	High	High	High	High	High	High	High	High	High	High	1
FALSE	High	Master Protein	P00395	Cytochrome c oxidase subunit 1 [OS=Homo sapiens]	0	32.923	9	2	37	2	513	57	6.7	138.47	2	0	0	0.803	0.844692	77.7	98.7	101.3	62.93	45.32	High	High	High	High	High	High	High	High	High	High	1
TRUE	High	Master Protein	P08708	40S ribosomal protein S17 [OS=Homo sapiens]	0	32.861	42	4	47	4	135	15.5	9.85	168.53	4	0	0	0.365	0.00234445	96.49	147	53	38.69	52.92	High	High	High	High	High	High	High	High	High	High	1
FALSE	High	Master Protein	Q9UL46	Proteasome activator complex subunit 2 [OS=Homo sapiens]	0	32.857	37	6	35	6	239	27.4	5.73	105.56	6	0	0	1.108	0.78436	78.39	99	101	77.26	30.38	Peak Found	High	High	High	High	High	High	High	High	High	1
FALSE	High	Master Protein	P53384	Cytosolic Fe-S cluster assembly factor NUBP1 [OS=Homo sapiens]	0	32.838	33	4	26	4	320	34.5	5.33	90.18	4	0	0	1.326	0.622681	57.56	122.7	77.3	150.37	133.2	High	High	High	High	High	Not Found	High	High	High	High	1
TRUE	High	Master Protein	P78417	Glutathione S-transferase omega-1 [OS=Homo sapiens]	0	32.722	40	5	70	5	241	27.5	6.6	127.48	5	0	0	2.425	0.00102525	117.63	70.9	129.1	85.86	55.4	Peak Found	High	High	High	High	High	High	High	High	High	1
FALSE	High	Master Protein	P00441	Superoxide dismutase [Cu-Zn] [OS=Homo sapiens]	0	32.72	53	4	19	4	154	15.9	6.13	64.67	4	0	0	0.935	0.988884	98.84	93.5	106.5	96.66	63.27	Peak Found	Peak Found	High	High	High	High	High	High	High	High	1
FALSE	High	Master Protein	O60716	Catenin delta-1 [OS=Homo sapiens]	0	32.689	13	8	31	8	968	108.1	6.23	83.04	8	0	0	0.968	0.933626	94.84	108.8	91.2	55.85	34.32	Peak Found	High	High	High	High	High	High	High	High	High	1
FALSE	High	Master Protein	P53004	Biliverdin reductase A [OS=Homo sapiens]	0	32.68	26	5	24	5	296	33.4	6.44	79.68	5	0	0	0.648	0.70865	59.84	117.8	82.2	59.51	33.73	Not Found	High	High	High	High	High	High	High	High	High	1
TRUE	High	Master Protein	P24752	Acetyl-CoA acetyltransferase, mitochondrial [OS=Homo sapiens]	0	32.635	30	7	48	7	427	45.2	8.85	131.54	7	0	0	2.151	0.00817935	84.93	59.6	140.4	43.47	47.29	High	High	High	Peak Found	High	High	High	High	High	High	1
FALSE	High	Master Protein	P42574	Caspase-3 [OS=Homo sapiens]	0	32.584	35	7	73	7	277	31.6	6.54	133.51	7	0	0	1.279	0.453128	121.31	36.9	163.1	66.24	107.44	Peak Found	High	High	High	High	High	High	High	High	High	1
FALSE	High	Master Protein	Q9UNF0	Protein kinase C and casein kinase substrate in neurons protein 2 [OS=Homo sapiens]	0	32.475	18	5	58	5	486	55.7	5.2	147.21	5	0	0	0.946	0.950953	95.46	92.6	107.4	78.29	62.02	High	High	High	High	High	High	High	High	High	High	1
FALSE	High	Master Protein	Q9H0U4	Ras-related protein Rab-1B [OS=Homo sapiens]	0	32.448	42	6	132	2	201	22.2	5.73	400.24	6	0	0	0.608	0.311417	85.2	120.2	79.8	100.77	65.42	Peak Found	High	High	High	High	High	High	High	High	High	1
FALSE	High	Master Protein	P50995	Annexin A11 [OS=Homo sapiens]	0	32.358	20	7	46	7	505	54.4	7.65	114.21	7	0	0	0.59	0.407545	129.58	99.6	100.4	146.3	18.7	High	High	High	High	High	Not Found	High	High	High	High	1
FALSE	High	Master Protein	P84077	ADP-ribosylation factor 1 [OS=Homo sapiens]	0	32.352	45	4	68	1	181	20.7	6.8	197.13	4	0	0	1.532	0.464396	23.66	79	121		27.85	Not Found	High	High	High	Not Found	High	High	Peak Found	Peak Found	High	1
FALSE	High	Master Protein	P39687	Acidic leucine-rich nuclear phosphoprotein 32 family member A [OS=Homo sapiens]	0	32.325	31	5	87	4	249	28.6	4.09	257.31	5	0	1	0.803	0.844918	95.44	94.9	105.1	53.37	37.18	High	High	High	High	High	High	High	High	High	High	1
FALSE	High	Master Protein	Q9Y285	Phenylalanine--tRNA ligase alpha subunit [OS=Homo sapiens]	0	32.17	22	6	21	6	508	57.5	7.8	50.78	6	0	0	1.169	0.712756	67.82	49.5	150.5	44.52	40.38	Not Found	High	High	Peak Found	High	High	High	High	High	High	1
FALSE	High	Master Protein	P34949	Mannose-6-phosphate isomerase [OS=Homo sapiens]	0	32.136	25	7	69	7	423	46.6	5.95	166.75	7	0	0	0.763	0.849005	82.43	128.4	71.6	35.75	66.2	High	High	High	High	High	Peak Found	High	High	High	High	1
TRUE	High	Master Protein	O75608	Acyl-protein thioesterase 1 [OS=Homo sapiens]	0	32.08	37	3	22	3	230	24.7	6.77	81.19	3	0	0	0.382	0.004269	82.87	144.6	55.4	71.28	57.37	High	High	High	High	High	High	High	High	High	High	1
FALSE	High	Master Protein	P62942	Peptidyl-prolyl cis-trans isomerase FKBP1A [OS=Homo sapiens]	0	32.022	63	4	27	4	108	11.9	8.16	69.24	4	0	0	1.088	0.816486	124.44	60.4	139.6	74.76	52.69	High	High	High	High	High	High	High	High	High	High	1
FALSE	High	Master Protein	P35613	Basigin [OS=Homo sapiens]	0	31.969	18	4	67	4	385	42.2	5.66	149.38	4	0	0	0.637	0.840092	123.54	93.8	106.2	112.61	105.49	High	High	High	High	High	High	High	High	High	High	1
TRUE	High	Master Protein	Q9BVK6	Transmembrane emp24 domain-containing protein 9 [OS=Homo sapiens]	0	31.862	51	7	26	5	235	27.3	8.02	68.28	7	0	2	0.209	0.000445323	118.25	128.7	71.3	42.65	42.79	Not Found	High	High	High	High	High	High	High	High	High	1
FALSE	High	Master Protein	P62241	40S ribosomal protein S8 [OS=Homo sapiens]	0	31.745	34	6	52	6	208	24.2	10.32	127.28	6	0	0	1.14	0.767232	118.28	134.5	65.5	78.63	82.63	Peak Found	High	High	High	High	High	High	High	High	High	1
FALSE	High	Master Protein	P05091	Aldehyde dehydrogenase, mitochondrial [OS=Homo sapiens]	0	31.74	18	5	73	5	517	56.3	7.05	181.94	5	0	0	1.064	0.8405	79.03	100.9	99.1	149.27	53.71	High	High	High	High	High	High	High	High	High	High	1
FALSE	High	Master Protein	P49448	Glutamate dehydrogenase 2, mitochondrial [OS=Homo sapiens]	0	31.721	21	6	56	1	558	61.4	8.46	123.32	6	0	0								Not Found	Not Found	Not Found	High	Not Found	Not Found	Not Found	Not Found	Not Found	Not Found	1
FALSE	High	Master Protein	O94826	Mitochondrial import receptor subunit TOM70 [OS=Homo sapiens]	0	31.691	20	6	30	6	608	67.4	7.12	80.74	6	0	0	0.542	0.389229	122.6	116.5	83.5	55.15	81.61	High	High	High	High	High	High	High	High	High	High	1
FALSE	High	Master Protein	P07858	Cathepsin B [OS=Homo sapiens]	0	31.596	22	5	24	5	339	37.8	6.3	60.86	5	0	0	0.685	0.620739	131.62	119.3	80.7	51.01	93.23	Peak Found	High	Peak Found	High	High	Peak Found	High	High	High	High	1
FALSE	High	Master Protein	O43242	26S proteasome non-ATPase regulatory subunit 3 [OS=Homo sapiens]	0	31.494	19	7	42	7	534	60.9	8.44	77.02	7	0	0	0.503	0.427264	99.07	112.1	87.9	107.17	73.33	Peak Found	High	High	High	High	Peak Found	High	High	High	High	1
FALSE	High	Master Protein	P09417	Dihydropteridine reductase [OS=Homo sapiens]	0	31.439	43	6	27	6	244	25.8	7.37	76.84	6	0	0	0.701	0.918299	139.97	140.5	59.5	140.32	172.36	Not Found	High	High	High	High	High	High	High	High	High	1
FALSE	High	Master Protein	P62195	26S proteasome regulatory subunit 8 [OS=Homo sapiens]	0	31.362	17	4	45	4	406	45.6	7.55	124.18	4	0	0	1.234	0.53347	73.06	83.5	116.5	46.06	42.45	Peak Found	High	High	High	High	High	High	High	High	High	1
FALSE	High	Master Protein	Q9NVI7	ATPase family AAA domain-containing protein 3A [OS=Homo sapiens]	0	31.22	13	5	22	5	634	71.3	8.98	51.88	5	0	0	1.078	0.825043	136.98	92.9	107.1	75.63	55.68	High	High	High	High	High	High	Peak Found	High	High	High	1
FALSE	High	Master Protein	Q12888	TP53-binding protein 1 [OS=Homo sapiens]	0	31.198	7	6	15	6	1972	213.4	4.7	51.59	6	0	0	1.783	0.539298	128.66	172.1	27.9	69.29	131.06	High	High	High	High	Peak Found	High	High	High	High	High	1
FALSE	High	Master Protein	Q6NUK1	Calcium-binding mitochondrial carrier protein SCaMC-1 [OS=Homo sapiens]	0	31.102	18	5	39	5	477	53.3	6.33	104.04	5	0	0	0.995	0.91237	93.14	118.8	81.2	66.7	56.06	Not Found	High	High	High	High	Not Found	High	High	High	High	1
TRUE	High	Master Protein	Q16718	NADH dehydrogenase [ubiquinone] 1 alpha subcomplex subunit 5 [OS=Homo sapiens]	0	31.012	45	3	24	3	116	13.5	5.99	87.36	3	0	0	2.432	0.0836032	44.6	62.3	137.7	81.94	64.96	Not Found	High	High	High	High	High	High	High	High	High	1
FALSE	High	Master Protein	Q13740	CD166 antigen [OS=Homo sapiens]	0	30.981	16	5	18	5	583	65.1	6.25	52.01	5	0	0	0.683	0.851277	100.07	103.9	96.1	36.76	32.22	Not Found	High	High	High	High	Peak Found	High	High	High	High	1
FALSE	High	Master Protein	Q13867	Bleomycin hydrolase [OS=Homo sapiens]	0	30.969	16	4	49	4	455	52.5	6.27	152.51	4	0	0	0.64	0.417756	82.46	116	84	50.4	58.17	Peak Found	High	High	High	High	High	High	High	High	High	1
FALSE	High	Master Protein	Q15102	Platelet-activating factor acetylhydrolase IB subunit alpha1 [OS=Homo sapiens]	0	30.963	37	4	75	4	231	25.7	6.84	135.35	4	0	0	0.798	0.91459	61.35	116.5	83.5	41.22	42.49	High	High	High	High	High	High	High	High	High	High	1
FALSE	High	Master Protein	Q9P2R7	Succinate--CoA ligase [ADP-forming] subunit beta, mitochondrial [OS=Homo sapiens]	0	30.961	21	8	91	8	463	50.3	7.42	184.66	8	0	0	0.924	0.989228	79.43	109.2	90.8	29.47	40.07	Peak Found	High	High	High	High	Peak Found	High	High	High	High	1
FALSE	High	Master Protein	P09874	Poly [ADP-ribose] polymerase 1 [OS=Homo sapiens]	0	30.888	11	7	15	7	1014	113	8.88	44.25	7	0	0	0.94	0.950665	52.14	10.3	189.7	199.27	33.66	Peak Found	Peak Found	Peak Found	Peak Found	Peak Found	High	High	High	High	High	1
FALSE	High	Master Protein	P21281	V-type proton ATPase subunit B, brain isoform [OS=Homo sapiens]	0	30.841	22	6	19	6	511	56.5	5.81	50.95	6	0	0	0.928	0.96669	99.84	98.6	101.4	67.3	48.29	Peak Found	High	High	High	High	Peak Found	High	High	High	Peak Found	1
FALSE	High	Master Protein	P59998	Actin-related protein 2/3 complex subunit 4 [OS=Homo sapiens]	0	30.732	49	6	58	6	168	19.7	8.43	157.68	6	0	0	0.87	0.940024	74.24	101.4	98.6	59	16.65	High	High	High	High	High	High	High	High	High	High	1
FALSE	High	Master Protein	Q12874	Splicing factor 3A subunit 3 [OS=Homo sapiens]	0	30.713	16	6	83	6	501	58.8	5.38	223.79	6	0	0	0.631	0.612252	80.12	115.7	84.3	53.95	29.75	High	High	High	High	High	High	High	High	High	High	1
FALSE	High	Master Protein	P60891	Ribose-phosphate pyrophosphokinase 1 [OS=Homo sapiens]	0	30.695	22	5	40	5	318	34.8	6.98	111.79	5	0	0	1.369	0.593999	105.1	99.5	100.5	98.28	41.44	Not Found	High	High	High	High	High	High	High	High	High	1
FALSE	High	Master Protein	P09110	3-ketoacyl-CoA thiolase, peroxisomal [OS=Homo sapiens]	0	30.66	28	6	39	6	424	44.3	8.44	90.42	6	0	0	1.176	0.704469	110.98	80.3	119.7	89.38	93.64	Peak Found	High	High	High	Peak Found	Peak Found	High	High	High	Peak Found	1
TRUE	High	Master Protein	P35268	60S ribosomal protein L22 [OS=Homo sapiens]	0	30.657	40	4	10	4	128	14.8	9.19	41.33	4	0	0	5.033	7.28016e-10	107.81	26.4	173.6	136.96		Not Found	Not Found	Peak Found	Peak Found	High	Not Found	High	High	Not Found	High	1
FALSE	High	Master Protein	Q92896	Golgi apparatus protein 1 [OS=Homo sapiens]	0	30.592	10	6	33	6	1179	134.5	6.9	86.73	6	0	0	1.431	0.281274	128.55	53.4	146.6	86.99	100.52	Peak Found	High	High	High	High	High	High	Peak Found	High	High	1
FALSE	High	Master Protein	P51149	Ras-related protein Rab-7a [OS=Homo sapiens]	0	30.554	58	9	23	9	207	23.5	6.7	50.71	9	0	0	0.695	0.839692	137.3	108.5	91.5	58.91	128.19	High	High	High	High	High	High	High	High	Peak Found	High	1
FALSE	High	Master Protein	P31040	Succinate dehydrogenase [ubiquinone] flavoprotein subunit, mitochondrial [OS=Homo sapiens]	0	30.495	17	6	52	6	664	72.6	7.39	104.18	6	0	0	0.911	0.996793	77.84	100.6	99.4	75.26	36.35	High	High	High	Peak Found	High	High	High	High	High	High	1
FALSE	High	Master Protein	P50991	T-complex protein 1 subunit delta [OS=Homo sapiens]	0	30.407	19	6	51	6	539	57.9	7.83	140.31	6	0	0	1.03	0.891334	104.59	88.9	111.1	77.82	42.7	Peak Found	High	High	High	High	High	High	High	High	High	1
TRUE	High	Master Protein	P62318	Small nuclear ribonucleoprotein Sm D3 [OS=Homo sapiens]	0	30.398	40	3	151	3	126	13.9	10.32	195.31	3	0	0	0.433	0.0992957	107.3	116.6	83.4	68.98	67.49	High	High	High	High	High	High	High	High	High	High	1
FALSE	High	Master Protein	Q15019	Septin-2 [OS=Homo sapiens]	0	30.342	20	4	22	4	361	41.5	6.6	54.66	4	0	0	1.535	0.180096	80.71	92.1	107.9	69	36.25	Peak Found	High	High	High	High	High	High	High	High	High	1
FALSE	High	Master Protein	Q92599	Septin-8 [OS=Homo sapiens]	0	30.339	21	5	35	4	483	55.7	6.28	87.99	5	0	0	0.515	0.411261	103.17	121.2	78.8	84.64	45.56	High	High	High	High	Not Found	High	High	High	High	Peak Found	1
FALSE	High	Master Protein	Q9BZZ5	Apoptosis inhibitor 5 [OS=Homo sapiens]	0	30.333	10	3	21	3	524	59	7.34	71.44	3	0	0	0.809	0.924788	117.94	112.9	87.1	41.07	82.11	High	High	High	High	High	High	High	High	High	Peak Found	1
FALSE	High	Master Protein	P15531	Nucleoside diphosphate kinase A [OS=Homo sapiens]	0	30.223	59	6	33	2	152	17.1	6.19	72.97	6	0	0	0.789	0.820493	69.47	105.4	94.6	74.85	35.26	Not Found	High	High	High	High	Peak Found	High	High	High	High	1
FALSE	High	Master Protein	Q8IV08	5'-3' exonuclease PLD3 [OS=Homo sapiens]	0	30.179	24	6	23	6	490	54.7	6.47	58.59	6	0	0	1.558	0.149144	74.39	80.5	119.5	76.18	54.98	Peak Found	High	High	High	High	Peak Found	High	High	High	High	1
FALSE	High	Master Protein	Q14444	Caprin-1 [OS=Homo sapiens]	0	30.141	13	4	20	4	709	78.3	5.25	52.58	4	0	0	0.837	0.955513	71.01	104.4	95.6	46	47.49	Not Found	High	High	High	High	Peak Found	High	High	Peak Found	High	1
FALSE	High	Master Protein	P43243	Matrin-3 [OS=Homo sapiens]	0	30.125	14	8	18	8	847	94.6	6.25	40.24	8	0	0	1.153	0.757939	100.43	48.7	151.3	75.7	35.53	Peak Found	High	Peak Found	Peak Found	Peak Found	High	High	High	High	High	1
FALSE	High	Master Protein	Q9H2U2	Inorganic pyrophosphatase 2, mitochondrial [OS=Homo sapiens]	0	30.112	33	8	18	8	334	37.9	7.39	42.42	8	0	0	1.045	0.856981	79.79	82.7	117.3	40.8	32.3	Peak Found	High	High	High	Peak Found	Peak Found	High	High	High	High	1
FALSE	High	Master Protein	P23786	Carnitine O-palmitoyltransferase 2, mitochondrial [OS=Homo sapiens]	0	30.092	17	7	28	7	658	73.7	8.18	69.85	7	0	0	0.578	0.718985	115.26	69.9	130.1	112.33	62.71	Not Found	High	High	High	High	Peak Found	High	High	High	High	1
FALSE	High	Master Protein	Q13347	Eukaryotic translation initiation factor 3 subunit I [OS=Homo sapiens]	0	30.08	26	5	47	5	325	36.5	5.64	109.04	5	0	0	0.737	0.818069	80.63	135.2	64.8	46.35	29.18	Peak Found	High	High	High	High	High	High	High	High	High	1
FALSE	High	Master Protein	P61019	Ras-related protein Rab-2A [OS=Homo sapiens]	0	30.077	42	7	50	7	212	23.5	6.54	124.53	7	0	0	0.572	0.321051	121.06	103.3	96.7	47.36	50.7	Peak Found	High	High	High	High	High	High	High	High	High	1
FALSE	High	Master Protein	Q15417	Calponin-3 [OS=Homo sapiens]	0	29.961	30	5	18	5	329	36.4	6.05	51.19	5	0	0	1.051	0.832792	94.2	89.8	110.2	81.18	22.3	High	High	High	Peak Found	Peak Found	High	Peak Found	High	High	High	1
FALSE	High	Master Protein	Q53GG5	PDZ and LIM domain protein 3 [OS=Homo sapiens]	0	29.881	22	5	66	5	364	39.2	6.89	187.75	5	0	0	0.886	0.970136	94.39	110.9	89.1	70.87	47.8	High	High	High	Peak Found	High	Peak Found	High	High	High	High	1
FALSE	High	Master Protein	Q9NVJ2	ADP-ribosylation factor-like protein 8B [OS=Homo sapiens]	0	29.84	32	4	31	4	186	21.5	8.43	102.05	4	0	0	1.039	0.850517	48.31	86.8	113.2	49.95	37.05	Peak Found	High	High	High	High	High	High	High	High	High	1
FALSE	High	Master Protein	P55036	26S proteasome non-ATPase regulatory subunit 4 [OS=Homo sapiens]	0	29.764	27	5	16	5	377	40.7	4.79	44.86	5	0	0	1.21	0.780902	103.22	66.4	133.6	222.45	99.51	Peak Found	Peak Found	High	Peak Found	Peak Found	Not Found	High	High	High	High	1
FALSE	High	Master Protein	P53041	Serine/threonine-protein phosphatase 5 [OS=Homo sapiens]	0	29.738	16	6	23	6	499	56.8	6.28	60.95	6	0	0	1.395	0.433403	101.71	93.1	106.9	51.17	46.2	Not Found	High	High	High	High	Peak Found	High	High	High	High	1
FALSE	High	Master Protein	P50440	Glycine amidinotransferase, mitochondrial [OS=Homo sapiens]	0	29.639	33	6	22	6	423	48.4	8.05	51.52	6	0	0	1.473	0.400047	65.61	73.8	126.2	84.77	60.32	Not Found	High	High	High	High	High	Peak Found	High	High	High	1
FALSE	High	Master Protein	E9PAV3	Nascent polypeptide-associated complex subunit alpha, muscle-specific form [OS=Homo sapiens]	0	29.618	6	7	27	7	2078	205.3	9.58	56.68	7	0	0	0.765	0.97247	84.44	88.3	111.7	85.9	97.06	High	High	Peak Found	High	High	High	Peak Found	High	Peak Found	High	1
FALSE	High	Master Protein	Q92945	Far upstream element-binding protein 2 [OS=Homo sapiens]	0	29.539	21	8	21	8	711	73.1	7.3	51.06	8	0	0	0.634	0.831092	146.87	23.7	176.3	107.76	71.96	High	High	High	High	Not Found	Not Found	High	High	High	High	1
FALSE	High	Master Protein	Q02252	Methylmalonate-semialdehyde dehydrogenase [acylating], mitochondrial [OS=Homo sapiens]	0	29.52	24	7	17	7	535	57.8	8.5	37.32	7	0	0	1.622	0.400047	93.61	7.3	192.7	186.44	76.17	High	High	Peak Found	High	High	High	High	High	High	High	1
FALSE	High	Master Protein	Q9H993	Damage-control phosphatase ARMT1 [OS=Homo sapiens]	0	29.472	18	5	22	5	441	51.1	5.76	67.73	5	0	0	0.906	0.966342	64.13	102.4	97.6	22.15	44.63	Not Found	High	High	High	High	Peak Found	High	High	High	High	1
TRUE	High	Master Protein	P14550	Aldo-keto reductase family 1 member A1 [OS=Homo sapiens]	0	29.405	28	6	60	5	325	36.6	6.79	149.94	6	0	0	2.07	0.0108997	51.21	58.6	141.4	17.34	23.88	High	High	High	High	High	High	High	High	High	High	1
FALSE	High	Master Protein	P50993	Sodium/potassium-transporting ATPase subunit alpha-2 [OS=Homo sapiens]	0	29.403	9	6	49	3	1020	112.2	5.66	126.5	6	0	0	0.614	0.892772	53.27	193.8	6.2		47.82	Not Found	Not Found	High	Not Found	High	Not Found	Peak Found	Not Found	Not Found	Peak Found	1
FALSE	High	Master Protein	O14974	Protein phosphatase 1 regulatory subunit 12A [OS=Homo sapiens]	0	29.386	10	7	81	7	1030	115.2	5.4	186.3	7	0	0	0.543	0.53347	82.2	135	65	36.98	86.71	High	High	High	High	High	High	High	High	High	High	1
FALSE	High	Master Protein	P62913	60S ribosomal protein L11 [OS=Homo sapiens]	0	29.332	44	5	122	5	178	20.2	9.6	285.44	5	0	0	1.167	0.692634	90.65	100.9	99.1	60.32	44.9	High	High	High	High	High	High	High	High	High	High	1
FALSE	High	Master Protein	P43034	Platelet-activating factor acetylhydrolase IB subunit beta [OS=Homo sapiens]	0	29.286	31	8	32	8	410	46.6	7.37	61.45	8	0	0	0.869	0.989228	83.45	114.8	85.2	29.37	29.08	Peak Found	High	High	Peak Found	High	Not Found	High	High	Peak Found	High	1
FALSE	High	Master Protein	Q9UMS4	Pre-mRNA-processing factor 19 [OS=Homo sapiens]	0	29.263	18	5	35	5	504	55.1	6.61	96.85	5	0	0	1.008	0.889044	90.23	84.7	115.3	61.95	88.81	High	High	High	High	High	High	High	High	High	High	1
FALSE	High	Master Protein	P07996	Thrombospondin-1 [OS=Homo sapiens]	0	29.228	8	6	36	6	1170	129.3	4.94	56.34	6	0	0	0.655	0.866632	119.83	92.8	107.2	84.67	86.62	Peak Found	High	High	High	High	High	High	High	High	High	1
FALSE	High	Master Protein	P17980	26S proteasome regulatory subunit 6A [OS=Homo sapiens]	0	29.204	20	6	35	6	439	49.2	5.24	89.16	6	0	0	0.962	0.960722	87.28	95.3	104.7	37.4	63.63	Peak Found	High	High	High	High	High	High	High	High	High	1
FALSE	High	Master Protein	P68402	Platelet-activating factor acetylhydrolase IB subunit alpha2 [OS=Homo sapiens]	0	29.179	39	4	25	4	229	25.6	5.92	72.93	4	0	0	1.114	0.772218	69.97	113.6	86.4	61.1	43.47	Peak Found	High	High	Peak Found	High	Peak Found	High	High	High	High	1
FALSE	High	Master Protein	P43487	Ran-specific GTPase-activating protein [OS=Homo sapiens]	0	29.152	44	4	23	4	201	23.3	5.29	79.71	4	0	0	0.888	0.959215	108.49	125.9	74.1	55.11	75.86	Peak Found	High	High	High	High	High	High	High	High	High	1
FALSE	High	Master Protein	P35555	Fibrillin-1 [OS=Homo sapiens]	0	29.123	5	9	11	9	2871	312.1	4.93	18.3	9	0	0	0.42	0.58629	109.06	95.6	104.4	160.07	69.55	High	Peak Found	Peak Found	Not Found	Not Found	Not Found	Peak Found	High	High	Not Found	1
FALSE	High	Master Protein	Q12905	Interleukin enhancer-binding factor 2 [OS=Homo sapiens]	0	29.094	28	5	42	5	390	43	5.26	116.49	5	0	0	0.552	0.695592	87.09	136.8	63.2	31.28	70.99	High	High	High	High	High	Peak Found	High	High	High	High	1
FALSE	High	Master Protein	O15067	Phosphoribosylformylglycinamidine synthase [OS=Homo sapiens]	0	29.072	7	4	16	4	1338	144.6	5.76	51.06	4	0	0	0.803	0.981508	62.87	31.7	168.3	91.14	62.15	Not Found	High	High	High	High	Not Found	High	High	High	High	1
FALSE	High	Master Protein	P62820	Ras-related protein Rab-1A [OS=Homo sapiens]	0	28.958	41	6	107	2	205	22.7	6.21	349.15	6	0	4	0.71	0.624353	70.55	123	77	16.01	45.37	Peak Found	High	High	High	High	High	High	High	High	High	1
FALSE	High	Master Protein	P60228	Eukaryotic translation initiation factor 3 subunit E [OS=Homo sapiens]	0	28.949	16	5	24	5	445	52.2	6.04	65.69	5	0	0	0.783	0.912863	86.34	101.5	98.5	62.7	63.86	Not Found	High	High	High	High	High	High	High	High	High	1
FALSE	High	Master Protein	O75643	U5 small nuclear ribonucleoprotein 200 kDa helicase [OS=Homo sapiens]	0	28.907	5	7	17	7	2136	244.4	6.06	26.73	7	0	0	0.834	0.996579	75.64	133.1	66.9	55.55	146.71	High	High	High	High	High	Peak Found	Peak Found	Peak Found	High	High	1
FALSE	High	Master Protein	Q9NZI8	Insulin-like growth factor 2 mRNA-binding protein 1 [OS=Homo sapiens]	0	28.87	18	7	71	7	577	63.4	9.2	183.47	7	0	0	0.851	0.957271	100.87	96.3	103.7	46.09	76.11	High	High	High	High	High	High	High	High	High	High	1
FALSE	High	Master Protein	Q6P587	Acylpyruvase FAHD1, mitochondrial [OS=Homo sapiens]	0	28.856	32	4	61	4	224	24.8	7.39	174.01	4	0	0	0.891	0.964064	65.83	109.3	90.7	32.74	38.55	Not Found	High	High	High	High	High	High	High	High	High	1
FALSE	High	Master Protein	Q15274	Nicotinate-nucleotide pyrophosphorylase [carboxylating] [OS=Homo sapiens]	0	28.794	33	4	25	4	297	30.8	6.21	96.4	4	0	0	1.249	0.54552	69.09	51.9	148.1	112.59	50.3	High	High	High	High	High	High	High	High	High	High	1
FALSE	High	Master Protein	P09936	Ubiquitin carboxyl-terminal hydrolase isozyme L1 [OS=Homo sapiens]	0	28.763	17	2	20	2	223	24.8	5.48	80.4	2	0	0	1.083	0.823512	68.08	93.1	106.9	49.08	41.83	Not Found	High	High	High	High	High	High	High	High	High	1
FALSE	High	Master Protein	Q9UKK9	ADP-sugar pyrophosphatase [OS=Homo sapiens]	0	28.741	25	4	125	4	219	24.3	4.94	325.69	4	0	0	0.739	0.704469	92.56	111.3	88.7	58.25	48.88	Peak Found	High	High	High	High	High	High	High	High	High	1
FALSE	High	Master Protein	Q96EY7	Pentatricopeptide repeat domain-containing protein 3, mitochondrial [OS=Homo sapiens]	0	28.733	15	6	30	6	689	78.5	6.42	74.79	6	0	0	0.705	0.888775	105.15	62.1	137.9	79.12	33.55	Peak Found	High	High	High	High	Peak Found	High	High	High	High	1
FALSE	High	Master Protein	Q96DB5	Regulator of microtubule dynamics protein 1 [OS=Homo sapiens]	0	28.694	19	5	42	5	314	35.8	8.5	92.91	5	0	0	0.945	0.945294	75.61	100.8	99.2	88.37	46.52	High	High	High	High	High	High	High	High	High	High	1
FALSE	High	Master Protein	O60888	Protein CutA [OS=Homo sapiens]	0	28.687	41	6	66	6	179	19.1	5.5	179.48	6	0	0	0.66	0.474478	86.14	132.2	67.8	49.08	65.66	High	High	High	High	High	High	High	High	High	High	1
FALSE	High	Master Protein	Q8TAQ2	SWI/SNF complex subunit SMARCC2 [OS=Homo sapiens]	0	28.641	8	6	27	4	1214	132.8	5.69	67.3	6	0	2	0.455	0.450892	118.84	140.9	59.1	30.97	61.62	Not Found	High	High	High	High	High	High	High	Not Found	High	1
FALSE	High	Master Protein	Q92598	Heat shock protein 105 kDa [OS=Homo sapiens]	0	28.601	9	5	20	5	858	96.8	5.39	42.29	5	0	0	1.056	0.846842	84.37	106.2	93.8	44.49	46.5	High	High	High	High	Peak Found	High	High	High	High	High	1
FALSE	High	Master Protein	P52272	Heterogeneous nuclear ribonucleoprotein M [OS=Homo sapiens]	0	28.558	10	5	42	5	730	77.5	8.7	101.32	5	0	0	0.951	0.921608	130.45	77.2	122.8	65.75	111.74	Peak Found	High	High	High	Peak Found	High	High	High	High	High	1
FALSE	High	Master Protein	O60684	Importin subunit alpha-7 [OS=Homo sapiens]	0	28.543	15	5	25	5	536	60	4.98	64.38	5	0	0	2.115	0.15954	90.74	69.1	130.9	43.74	78.84	High	High	High	High	High	High	High	High	High	High	1
FALSE	High	Master Protein	Q9UIJ7	GTP:AMP phosphotransferase AK3, mitochondrial [OS=Homo sapiens]	0	28.522	46	7	32	7	227	25.6	9.16	92.64	7	0	0	0.532	0.12848	76.18	135.1	64.9	50.77	53.53	High	High	High	High	High	High	High	High	High	High	1
FALSE	High	Master Protein	Q07954	Prolow-density lipoprotein receptor-related protein 1 [OS=Homo sapiens]	0	28.477	3	7	17	7	4544	504.3	5.39	41.63	7	0	0	0.645	0.926687	98.23	120.3	79.7	117.02	55.41	Not Found	Peak Found	High	High	Not Found	High	High	High	High	High	1
FALSE	High	Master Protein	Q02952	A-kinase anchor protein 12 [OS=Homo sapiens]	0	28.433	10	8	28	8	1782	191.4	4.41	53.36	8	0	0	1.875	0.31661	109.5	128.3	71.7	76.03	103.85	Peak Found	High	High	High	High	High	High	High	High	High	1
FALSE	High	Master Protein	P20290	Transcription factor BTF3 [OS=Homo sapiens]	0	28.43	23	3	38	3	206	22.2	9.38	130.52	3	0	0	0.707	0.616154	109.74	49.9	150.1	98.23	43.15	Not Found	High	High	High	High	Peak Found	High	High	High	High	1
FALSE	High	Master Protein	Q14353	Guanidinoacetate N-methyltransferase [OS=Homo sapiens]	0	28.419	40	4	59	4	236	26.3	6.14	158.6	4	0	0	0.632	0.391422	83.54	102	98	43.88	33.77	High	High	High	High	High	High	High	High	High	High	1
FALSE	High	Master Protein	P11586	C-1-tetrahydrofolate synthase, cytoplasmic [OS=Homo sapiens]	0	28.403	13	7	53	7	935	101.5	7.3	121.32	7	0	0	0.655	0.462762	96.62	133.4	66.6	32.82	48.87	Not Found	High	High	High	High	High	High	High	High	High	1
FALSE	High	Master Protein	Q15459	Splicing factor 3A subunit 1 [OS=Homo sapiens]	0	28.401	9	4	50	4	793	88.8	5.22	139.2	4	0	0	0.518	0.463835	96.03	127.6	72.4	42.52	79.45	High	High	High	High	High	High	High	High	High	High	1
TRUE	High	Master Protein	O00232	26S proteasome non-ATPase regulatory subunit 12 [OS=Homo sapiens]	0	28.379	19	6	49	6	456	52.9	7.65	127.22	6	0	0	0.359	0.0840349	137.1	62.1	137.9	123.11	50.44	High	High	High	High	High	High	High	High	High	High	1
FALSE	High	Master Protein	Q99757	Thioredoxin, mitochondrial [OS=Homo sapiens]	0	28.324	37	3	79	3	166	18.4	8.29	273.91	3	0	0	0.603	0.30425	85.35	139.1	60.9	38.25	42.1	Peak Found	High	High	High	High	High	High	High	High	High	1
FALSE	High	Master Protein	P15927	Replication protein A 32 kDa subunit [OS=Homo sapiens]	0	28.255	51	6	17	6	270	29.2	6.15	30.8	6	0	0	0.821	0.959822	73.53	124.3	75.7	50.88	65.03	High	High	High	High	High	High	Peak Found	High	Not Found	High	1	Acetyl [N-Term]
FALSE	High	Master Protein	P61970	Nuclear transport factor 2 [OS=Homo sapiens]	0	28.247	63	4	55	4	127	14.5	5.38	159.6	4	0	0	0.783	0.809357	96.15	101.8	98.2	70.51	42.02	High	High	High	High	High	High	High	High	High	High	1
FALSE	High	Master Protein	Q14257	Reticulocalbin-2 [OS=Homo sapiens]	0	28.174	31	5	42	5	317	36.9	4.4	88.65	5	0	0	0.715	0.844692	109.98	104.6	95.4	81.96	62.09	High	High	High	High	High	Peak Found	High	High	High	High	1
TRUE	High	Master Protein	P55268	Laminin subunit beta-2 [OS=Homo sapiens]	0	28.169	6	6	12	6	1798	195.9	6.52	29.23	6	0	0	4.398	0.0709916	28.31	32.1	167.9		75.79	High	Not Found	High	High	Not Found	High	Peak Found	High	High	Peak Found	1
FALSE	High	Master Protein	Q96GK7	Fumarylacetoacetate hydrolase domain-containing protein 2A [OS=Homo sapiens]	0	28.066	22	4	17	4	314	34.6	8.24	44.57	4	0	0	1.185	0.665492	125.35	82.4	117.6	51.99	48.21	Not Found	High	High	High	High	High	High	High	High	High	1
FALSE	High	Master Protein	Q04760	Lactoylglutathione lyase [OS=Homo sapiens]	0	27.981	49	6	41	6	184	20.8	5.31	84.95	6	0	0	0.99	0.932767	125.45	97.5	102.5	48.64	49.9	Peak Found	High	High	High	Peak Found	Peak Found	High	High	High	High	1
FALSE	High	Master Protein	P05026	Sodium/potassium-transporting ATPase subunit beta-1 [OS=Homo sapiens]	0	27.934	21	4	32	4	303	35	8.53	80.37	4	0	0	1.353	0.39207	96	102.1	97.9	68.7	19.81	High	High	High	Peak Found	High	High	High	High	High	High	1
FALSE	High	Master Protein	Q9Y262	Eukaryotic translation initiation factor 3 subunit L [OS=Homo sapiens]	0	27.927	14	5	32	5	564	66.7	6.34	73.26	5	0	0	1.351	0.660153	126.52	141.2	58.8	67.39	130.29	Not Found	High	High	High	High	High	High	High	High	High	1
FALSE	High	Master Protein	P05787	Keratin, type II cytoskeletal 8 [OS=Homo sapiens]	0	27.845	16	6	258	4	483	53.7	5.59	712.58	6	0	0	0.575	0.648429	130.07	136.7	63.3	31.38	159.23	Peak Found	High	Peak Found	Peak Found	High	Peak Found	High	High	High	High	1
FALSE	High	Master Protein	P62495	Eukaryotic peptide chain release factor subunit 1 [OS=Homo sapiens]	0	27.735	21	6	42	6	437	49	5.71	103.7	6	0	0	0.737	0.892772	98.25	145.5	54.5	60.55	61.86	High	High	High	High	High	High	High	High	High	High	1
FALSE	High	Master Protein	Q92734	Protein TFG [OS=Homo sapiens]	0	27.73	24	4	21	4	400	43.4	5.1	57.65	4	0	0	1.58	0.426989	110.95	76.9	123.1	86.2	117.34	High	High	High	High	High	High	High	High	Peak Found	High	1
FALSE	High	Master Protein	Q8IVF2	Protein AHNAK2 [OS=Homo sapiens]	0	27.724	2	7	17	7	5795	616.2	5.36	39.52	7	0	0	2.276	0.553094	85.92	40.1	159.9	79.87	95.34	High	Peak Found	High	High	High	High	Not Found	High	Not Found	High	1
FALSE	High	Master Protein	P08670	Vimentin [OS=Homo sapiens]	0	27.708	17	5	31	5	466	53.6	5.12	81.66	5	0	0	1.074	0.871261	127.24	147.1	52.9	65.14	126.06	Peak Found	High	High	Peak Found	High	High	High	Peak Found	High	High	1
FALSE	High	Master Protein	P24043	Laminin subunit alpha-2 [OS=Homo sapiens]	0	27.596	3	6	54	6	3122	343.7	6.4	90.93	6	0	0	1.491	0.488192	94.03	85.2	114.8	53.14	26.5	Peak Found	High	High	High	High	High	High	High	High	High	1
FALSE	High	Master Protein	Q9NSD9	Phenylalanine--tRNA ligase beta subunit [OS=Homo sapiens]	0	27.568	17	7	48	7	589	66.1	6.84	112.88	7	0	0	0.822	0.915858	73.47	91.3	108.7	54.27	19.36	Peak Found	High	High	High	High	High	High	High	High	High	1
FALSE	High	Master Protein	P05455	Lupus La protein [OS=Homo sapiens]	0	27.564	19	6	58	6	408	46.8	7.12	105.52	6	0	0	1.033	0.887901	77.69	113.1	86.9	15.32	33.46	High	High	High	High	High	High	High	High	High	High	1
FALSE	High	Master Protein	Q9Y678	Coatomer subunit gamma-1 [OS=Homo sapiens]	0	27.545	10	6	20	6	874	97.7	5.47	32.07	6	0	0	0.764	0.987209	74.05	133.4	66.6	62.35	41.94	Peak Found	High	High	High	High	Peak Found	High	High	High	High	1
FALSE	High	Master Protein	Q13185	Chromobox protein homolog 3 [OS=Homo sapiens]	0	27.498	23	3	144	1	183	20.8	5.33	347.75	3	0	2	0.93	0.995409	60.66	105.7	94.3	27.38	35.2	Not Found	Not Found	Not Found	Not Found	Not Found	Not Found	Not Found	High	Not Found	Not Found	1
FALSE	High	Master Protein	Q9Y6G9	Cytoplasmic dynein 1 light intermediate chain 1 [OS=Homo sapiens]	0	27.451	15	6	31	5	523	56.5	6.42	55.34	6	0	1	0.685	0.932767	112.01	93.5	106.5	124.21	102.8	Peak Found	High	High	Peak Found	High	Not Found	High	High	High	High	1
FALSE	High	Master Protein	P11182	Lipoamide acyltransferase component of branched-chain alpha-keto acid dehydrogenase complex, mitochondrial [OS=Homo sapiens]	0	27.424	13	4	38	4	482	53.5	8.51	110.57	4	0	0	0.728	0.701006	86.3	112.9	87.1	18.6	44.25	High	High	High	High	High	Peak Found	High	High	High	High	1
FALSE	High	Master Protein	Q9BWD1	Acetyl-CoA acetyltransferase, cytosolic [OS=Homo sapiens]	0	27.368	31	5	47	5	397	41.3	6.92	103.58	5	0	0	0.815	0.892772	41.92	65.9	134.1	65.25	72.19	High	High	High	High	High	High	High	High	High	High	1
FALSE	High	Master Protein	Q8NCA5	Protein FAM98A [OS=Homo sapiens]	0	27.344	22	6	42	5	518	55.2	8.95	114.23	6	0	1	0.642	0.422955	72.13	87.4	112.6	93.66	93.76	Not Found	High	High	High	High	Not Found	High	High	High	High	1
FALSE	High	Master Protein	Q96I24	Far upstream element-binding protein 3 [OS=Homo sapiens]	0	27.339	19	6	78	5	572	61.6	8.38	117.37	6	0	1	1.318	0.524715	80.06	82.7	117.3	44.44	18.54	Peak Found	Peak Found	High	High	Peak Found	Not Found	High	High	High	Not Found	1
FALSE	High	Master Protein	P26440	Isovaleryl-CoA dehydrogenase, mitochondrial [OS=Homo sapiens]	0	27.31	19	4	52	4	426	46.6	8.05	182.94	4	0	0	0.769	0.861978	95.53	112.8	87.2	55.93	58.34	High	High	High	High	High	High	High	High	High	High	1
FALSE	High	Master Protein	Q12904	Aminoacyl tRNA synthase complex-interacting multifunctional protein 1 [OS=Homo sapiens]	0	27.299	38	6	28	6	312	34.3	8.43	57.19	6	0	0	1.165	0.749352	74.34	92	108	65.24	63.6	Not Found	High	High	High	Peak Found	Not Found	High	High	High	Peak Found	1
FALSE	High	Master Protein	Q15436	Protein transport protein Sec23A [OS=Homo sapiens]	0	27.228	12	6	15	6	765	86.1	7.08	35.27	6	0	0	0.606	0.786875	130.39	97.4	102.6	96.45	102.66	Peak Found	High	High	High	High	Not Found	Peak Found	High	Peak Found	High	1
FALSE	High	Master Protein	P83916	Chromobox protein homolog 1 [OS=Homo sapiens]	0	27.205	24	3	80	2	185	21.4	4.93	194.91	3	0	0	0.633	0.8405	104.88	123.8	76.2	51.56	38.25	Peak Found	High	High	High	High	Peak Found	High	High	High	High	1
FALSE	High	Master Protein	Q08623	Pseudouridine-5'-phosphatase [OS=Homo sapiens]	0	27.166	38	4	29	4	228	25.2	5.31	93.9	4	0	0	0.686	0.550542	97.08	109.2	90.8	40.83	57.62	Peak Found	High	High	High	High	Not Found	High	High	High	High	1
FALSE	High	Master Protein	Q6NVY1	3-hydroxyisobutyryl-CoA hydrolase, mitochondrial [OS=Homo sapiens]	0	27.15	18	6	32	6	386	43.5	8.19	78.33	6	0	0	1.429	0.245724	62.51	82.6	117.4	49.8	31.33	Peak Found	High	High	High	High	Peak Found	High	High	High	High	1
FALSE	High	Master Protein	Q9Y3B3	Transmembrane emp24 domain-containing protein 7 [OS=Homo sapiens]	0	27.083	37	5	41	5	224	25.2	6.89	104.57	5	0	0	0.533	0.416597	120.33	145	55	58.18	84.14	Not Found	High	High	High	High	Peak Found	High	High	High	High	1
FALSE	High	Master Protein	P16435	NADPH--cytochrome P450 reductase [OS=Homo sapiens]	0	27.017	12	5	93	5	677	76.6	5.58	194.55	5	0	0	0.537	0.583849	106.81	98.1	101.9	72.97	58.76	High	High	High	High	High	Peak Found	High	High	High	High	1
FALSE	High	Master Protein	P14314	Glucosidase 2 subunit beta [OS=Homo sapiens]	0	26.989	16	4	40	4	528	59.4	4.41	107.19	4	0	0	0.641	0.739913	132.74	91.8	108.2	103.8	66.16	High	High	Peak Found	High	Peak Found	High	High	High	High	High	1
FALSE	High	Master Protein	P0C7P4	Putative cytochrome b-c1 complex subunit Rieske-like protein 1 [OS=Homo sapiens]	0	26.97	44	6	16	1	283	30.8	8.87	63.34	6	0	0	1.733	0.596624	8.2	73.2	126.8	7.81		Not Found	Not Found	Not Found	Peak Found	Peak Found	Not Found	Not Found	Not Found	Not Found	High	1
FALSE	High	Master Protein	Q9UGI8	Testin [OS=Homo sapiens]	0	26.962	19	4	51	4	421	48	7.68	93.43	4	0	0	0.494	0.582443	126.51	116	84	50.46	70.47	High	High	Peak Found	High	High	High	High	High	High	High	1
FALSE	High	Master Protein	Q9UBQ7	Glyoxylate reductase/hydroxypyruvate reductase [OS=Homo sapiens]	0	26.95	21	4	89	4	328	35.6	7.39	225.62	4	0	0	1.059	0.851277	105.26	83.6	116.4	80.34	50.71	Peak Found	High	High	High	High	High	High	High	High	High	1
TRUE	High	Master Protein	P30043	Flavin reductase (NADPH) [OS=Homo sapiens]	0	26.941	31	3	35	3	206	22.1	7.65	95.15	3	0	0	0.374	0.00240826	125.29	157.6	42.4	105.27	79.48	Not Found	High	High	High	High	High	High	High	High	High	1
FALSE	High	Master Protein	P30405	Peptidyl-prolyl cis-trans isomerase F, mitochondrial [OS=Homo sapiens]	0	26.892	23	2	35	2	207	22	9.38	125	2	0	0	0.576	0.258782	113.79	115.4	84.6	79.66	68.35	High	High	High	High	Peak Found	High	High	High	High	Peak Found	1
FALSE	High	Master Protein	A0AVT1	Ubiquitin-like modifier-activating enzyme 6 [OS=Homo sapiens]	0	26.87	9	6	27	6	1052	117.9	6.14	59.27	6	0	0	0.65	0.816624	132.26	119.9	80.1	56.6	63.21	Not Found	High	High	High	High	High	High	High	High	High	1
FALSE	High	Master Protein	Q2M3C7	A-kinase anchor protein SPHKAP [OS=Homo sapiens]	0	26.851	5	5	24	5	1700	186.3	5.14	49.89	5	0	0	1.086	0.843018	95.32	108.4	91.6	27.78	68.88	Peak Found	High	High	High	High	Peak Found	High	High	High	High	1
FALSE	High	Master Protein	P07602	Prosaposin [OS=Homo sapiens]	0	26.768	16	6	25	6	524	58.1	5.17	56.54	6	0	0	0.531	0.655561	112.56	101.1	98.9	81.32	74.55	Peak Found	High	High	High	Peak Found	Peak Found	High	High	High	High	1
FALSE	High	Master Protein	Q16778	Histone H2B type 2-E [OS=Homo sapiens]	0	26.629	19	2	34	2	126	13.9	10.32	77.37	2	0	0	1.23	0.671358	105	100.6	99.4	39.05	65.96	High	High	High	High	High	High	High	High	High	High	1
FALSE	High	Master Protein	Q10713	Mitochondrial-processing peptidase subunit alpha [OS=Homo sapiens]	0	26.621	19	6	43	6	525	58.2	6.92	104.29	6	0	0	0.913	0.97082	90.92	92.4	107.6	67.38	54.91	High	High	High	High	High	High	High	High	High	High	1
FALSE	High	Master Protein	P18124	60S ribosomal protein L7 [OS=Homo sapiens]	0	26.569	16	4	29	4	248	29.2	10.65	73.93	4	0	0	0.782	0.806378	84.44	112.4	87.6	69.19	60.23	High	High	High	High	High	High	High	High	High	High	1
FALSE	High	Master Protein	O96008	Mitochondrial import receptor subunit TOM40 homolog [OS=Homo sapiens]	0	26.504	21	5	53	5	361	37.9	7.25	127.63	5	0	0	0.761	0.957401	104.16	102.6	97.4	74.54	64.77	High	High	High	High	High	Peak Found	High	High	High	High	1
FALSE	High	Master Protein	O75874	Isocitrate dehydrogenase [NADP] cytoplasmic [OS=Homo sapiens]	0	26.469	25	7	23	7	414	46.6	7.01	37.36	7	0	0	1.005	0.919411	99.09	106.1	93.9	39.25	30.04	High	High	High	High	High	Peak Found	High	High	High	High	1
FALSE	High	Master Protein	P10599	Thioredoxin [OS=Homo sapiens]	0	26.362	50	3	168	3	105	11.7	4.92	476.79	3	0	0	0.77	0.780785	107.57	107.6	92.4	56.96	60.71	High	High	High	High	High	High	High	High	High	High	1
FALSE	High	Master Protein	P26640	Valine--tRNA ligase [OS=Homo sapiens]	0	26.352	9	7	25	7	1264	140.4	7.59	39.53	7	0	0	1.207	0.792188	136.79	40.4	159.6	23.18	64.77	High	High	Peak Found	High	High	High	High	High	High	High	1
FALSE	High	Master Protein	P60510	Serine/threonine-protein phosphatase 4 catalytic subunit [OS=Homo sapiens]	0	26.311	21	5	66	3	307	35.1	5.06	189.53	5	0	0	0.842	0.991661	96.94	131.7	68.3	45.32	53.4	Peak Found	High	High	High	High	Peak Found	High	High	High	High	1
TRUE	High	Master Protein	P08754	Guanine nucleotide-binding protein G(i) subunit alpha-3 [OS=Homo sapiens]	0	26.305	24	6	26	2	354	40.5	5.69	59.18	6	0	0	2.967	0.031955	58.19	50.4	149.6	60.43	22.63	Not Found	Peak Found	High	High	Not Found	Not Found	Peak Found	High	Peak Found	Not Found	1
FALSE	High	Master Protein	Q14254	Flotillin-2 [OS=Homo sapiens]	0	26.295	21	6	33	6	428	47	5.25	85.94	6	0	0	1.445	0.453795	111.93	84.8	115.2	57.78	39.75	High	High	High	High	High	High	High	High	High	High	1
FALSE	High	Master Protein	P33121	Long-chain-fatty-acid--CoA ligase 1 [OS=Homo sapiens]	0	26.29	18	7	24	7	698	77.9	7.15	51.98	7	0	0	1.825	0.481649	123.65	31.6	168.4	96.63	71.77	Peak Found	High	High	High	High	High	High	High	High	High	1
FALSE	High	Master Protein	Q9Y2A7	Nck-associated protein 1 [OS=Homo sapiens]	0	26.272	7	5	11	5	1128	128.7	6.62	24.32	5	0	0	0.939	0.932767	141.96	119.9	80.1	95.45	94.08	Not Found	Peak Found	Peak Found	Peak Found	High	Not Found	High	High	High	High	1
FALSE	High	Master Protein	Q9UKU7	Isobutyryl-CoA dehydrogenase, mitochondrial [OS=Homo sapiens]	0	26.204	18	4	40	4	415	45	7.85	117.53	4	0	0	0.444	0.195422	121.38	116.2	83.8	62.54	81.6	Not Found	High	High	High	High	Peak Found	High	High	High	High	1
FALSE	High	Master Protein	A1L0T0	2-hydroxyacyl-CoA lyase 2 [OS=Homo sapiens]	0	26.162	15	5	38	5	632	67.8	8.15	110.72	5	0	0	1.022	0.882314	60.15	84.2	115.8	43.4	11.8	High	High	High	High	High	High	High	High	High	High	1
TRUE	High	Master Protein	Q66K74	Microtubule-associated protein 1S [OS=Homo sapiens]	0	26.121	10	4	8	4	1059	112.1	7.3	28.63	4	0	0	100	5.5167e-17			200		73.34	Not Found	Not Found	High	Not Found	High	High	High	High	High	High	1
FALSE	High	Master Protein	P21399	Cytoplasmic aconitate hydratase [OS=Homo sapiens]	0	26.082	13	6	20	6	889	98.3	6.68	49.48	6	0	0	1.63	0.0832035	59.06	71.4	128.6	16.68	20.54	Not Found	High	High	High	High	Not Found	High	Peak Found	High	High	1
FALSE	High	Master Protein	P49721	Proteasome subunit beta type-2 [OS=Homo sapiens]	0	26.066	32	4	25	4	201	22.8	7.02	95.68	4	0	0	0.981	0.943918	67.98	97.6	102.4	82.79	76.08	Not Found	High	High	High	High	High	High	High	High	High	1
FALSE	High	Master Protein	P31942	Heterogeneous nuclear ribonucleoprotein H3 [OS=Homo sapiens]	0	25.979	19	4	32	4	346	36.9	6.87	73.32	4	0	0	0.53	0.70736	113.73	120.6	79.4	71.91	59.56	Peak Found	High	High	High	High	Not Found	High	High	High	High	1
FALSE	High	Master Protein	Q15029	116 kDa U5 small nuclear ribonucleoprotein component [OS=Homo sapiens]	0	25.974	12	6	19	6	972	109.4	5	39.52	6	0	0	0.443	0.710904	110.22	114.5	85.5	79.29	82	Peak Found	High	High	High	High	High	High	High	High	High	1
FALSE	High	Master Protein	P18621	60S ribosomal protein L17 [OS=Homo sapiens]	0	25.971	24	3	93	3	184	21.4	10.17	227.47	3	0	0	0.748	0.726517	126.91	125.4	74.6	53.97	33.05	Not Found	High	High	High	High	High	High	High	High	High	1
FALSE	High	Master Protein	P31939	Bifunctional purine biosynthesis protein ATIC [OS=Homo sapiens]	0	25.968	21	7	24	7	592	64.6	6.71	74.95	7	0	0	0.79	0.823512	74.82	158.9	41.1	101.63	23.97	High	High	High	Peak Found	High	High	High	High	High	High	1
FALSE	High	Master Protein	Q01518	Adenylyl cyclase-associated protein 1 [OS=Homo sapiens]	0	25.966	13	4	18	4	475	51.9	8.06	53.3	4	0	0	1.398	0.484633	107.82	126	74	69.47	74.1	High	Peak Found	High	High	Peak Found	High	High	High	High	High	1
FALSE	High	Master Protein	Q9Y3F4	Serine-threonine kinase receptor-associated protein [OS=Homo sapiens]	0	25.946	23	5	36	5	350	38.4	5.12	75.98	5	0	0	0.896	0.975833	124.27	97.2	102.8	56.83	43.46	Not Found	High	High	High	High	High	High	High	High	High	1
FALSE	High	Master Protein	Q9UNM6	26S proteasome non-ATPase regulatory subunit 13 [OS=Homo sapiens]	0	25.879	19	5	15	5	376	42.9	5.81	40.23	5	0	0	1.109	0.816165	60.48	50.3	149.7	120.37	89.45	Not Found	High	Peak Found	High	High	High	High	High	High	High	1
FALSE	High	Master Protein	Q1KMD3	Heterogeneous nuclear ribonucleoprotein U-like protein 2 [OS=Homo sapiens]	0	25.865	13	5	41	5	747	85.1	4.91	111.94	5	0	0	0.93	0.983638	88.37	101.6	98.4	70.57	32.16	High	High	High	High	High	High	High	High	High	High	1
FALSE	High	Master Protein	Q9BX68	Adenosine 5'-monophosphoramidase HINT2 [OS=Homo sapiens]	0	25.833	33	3	19	3	163	17.2	9.16	62.28	3	0	0	0.683	0.611006	103.15	95.1	104.9	41.58	63.37	High	High	High	High	High	High	High	High	High	High	1
FALSE	High	Master Protein	P30040	Endoplasmic reticulum resident protein 29 [OS=Homo sapiens]	0	25.768	22	5	29	5	261	29	7.31	71.4	5	0	0	0.946	0.950665	79.58	94.2	105.8	59.07	66.54	Peak Found	High	Peak Found	High	High	Peak Found	High	High	High	High	1
TRUE	High	Master Protein	P08779	Keratin, type I cytoskeletal 16 [OS=Homo sapiens]	0	25.695	13	5	48	1	473	51.2	5.05	114.33	5	0	0	0.01	5.5167e-17		200				Not Found	Not Found	Not Found	Not Found	High	Not Found	Not Found	Not Found	Not Found	Not Found	1
FALSE	High	Master Protein	Q96P70	Importin-9 [OS=Homo sapiens]	0	25.674	10	5	18	5	1041	115.9	4.81	47.82	5	0	0	0.923	0.955513	77.31	83.5	116.5	74.41	45.85	Peak Found	High	High	High	High	High	High	High	High	High	1
FALSE	High	Master Protein	Q01469	Fatty acid-binding protein 5 [OS=Homo sapiens]	0	25.671	33	3	19	3	135	15.2	7.01	31.09	3	0	0	1.981	0.426989	112.9	99.3	100.7	62.24	108.12	High	High	Peak Found	Peak Found	Not Found	High	High	High	High	High	1
FALSE	High	Master Protein	Q13098	COP9 signalosome complex subunit 1 [OS=Homo sapiens]	0	25.655	16	5	20	5	491	55.5	6.74	62.13	5	0	0	0.66	0.665492	101.43	120.2	79.8	54.32	58.39	Peak Found	High	High	High	High	High	High	High	High	High	1
FALSE	High	Master Protein	P18085	ADP-ribosylation factor 4 [OS=Homo sapiens]	0	25.654	39	4	65	1	180	20.5	7.14	181.95	4	0	3	0.823	0.88118	49.17	108.5	91.5	24.42	47.49	Not Found	Not Found	Not Found	Not Found	High	Not Found	Not Found	Peak Found	High	High	1
FALSE	High	Master Protein	Q9NUQ9	CYFIP-related Rac1 interactor B [OS=Homo sapiens]	0	25.63	24	6	35	6	324	36.7	6.06	62.2	6	0	0	1.427	0.463958	97.47	65.3	134.7	63.23	31.76	Peak Found	Peak Found	High	Peak Found	High	High	High	High	High	High	1
FALSE	High	Master Protein	P27144	Adenylate kinase 4, mitochondrial [OS=Homo sapiens]	0	25.602	37	4	34	4	223	25.3	8.4	88.89	4	0	0	0.868	0.980195	128.73	97.6	102.4	71.22	96.59	Peak Found	High	High	High	High	High	High	High	High	High	1
FALSE	High	Master Protein	Q9NX63	MICOS complex subunit MIC19 [OS=Homo sapiens]	0	25.575	7	2	122	2	227	26.1	8.28	286.92	2	0	0	0.515	0.411261	94.72	117.1	82.9	60.95	48.28	High	High	High	High	High	High	High	High	High	High	1
TRUE	High	Master Protein	Q13555	Calcium/calmodulin-dependent protein kinase type II subunit gamma [OS=Homo sapiens]	0	25.519	14	4	17	1	558	62.6	7.83	44.08	4	0	0	0.082	0.0122735	219.45	184.9	15.1	117.18		High	Not Found	Not Found	Not Found	Peak Found	Not Found	Not Found	Peak Found	Not Found	Not Found	1
FALSE	High	Master Protein	Q9Y478	5'-AMP-activated protein kinase subunit beta-1 [OS=Homo sapiens]	0	25.476	23	5	32	5	270	30.4	6.4	81.48	5	0	0	0.941	0.936197	66.99	103.8	96.2	50.12	21.6	Peak Found	High	High	High	High	High	High	High	High	High	1
FALSE	High	Master Protein	Q14112	Nidogen-2 [OS=Homo sapiens]	0	25.467	10	6	14	6	1375	151.2	5.29	33.81	6	0	0	1.3	0.717535	59.15	94	106	48.92	58.86	Peak Found	High	High	Peak Found	High	High	High	High	High	High	1
TRUE	High	Master Protein	Q9NQR4	Omega-amidase NIT2 [OS=Homo sapiens]	0	25.45	34	6	23	6	276	30.6	7.21	36.47	6	0	0	2.419	0.116674	128.65	71.3	128.7	135.64	58.52	Peak Found	High	High	High	High	Peak Found	High	High	Peak Found	High	1
FALSE	High	Master Protein	P38117	Electron transfer flavoprotein subunit beta [OS=Homo sapiens]	0	25.386	32	6	43	6	255	27.8	8.1	92.71	6	0	0	1.636	0.386691	120.73	90.1	109.9	69.2	152.77	Not Found	High	High	High	Peak Found	Peak Found	High	High	High	High	1
FALSE	High	Master Protein	Q8NFW8	N-acylneuraminate cytidylyltransferase [OS=Homo sapiens]	0	25.343	19	4	49	4	434	48.3	7.93	136.94	4	0	0	0.712	0.752828	116.92	147.2	52.8	36.32	71.11	Not Found	High	High	High	High	Peak Found	High	High	High	High	1
FALSE	High	Master Protein	Q8N5M1	ATP synthase mitochondrial F1 complex assembly factor 2 [OS=Homo sapiens]	0	25.3	44	7	23	7	289	32.8	7.09	51.1	7	0	0	0.722	0.8789	137.67	125.9	74.1	94.26	106.24	High	High	High	Peak Found	Peak Found	High	High	High	High	High	1
FALSE	High	Master Protein	Q9NUJ1	Palmitoyl-protein thioesterase ABHD10, mitochondrial [OS=Homo sapiens]	0	25.209	17	5	32	5	306	33.9	8.57	72.32	5	0	0	0.991	0.918299	93.33	84	116	54.17	34.75	Peak Found	High	High	Peak Found	High	Peak Found	High	High	High	High	1
FALSE	High	Master Protein	Q9HC38	Glyoxalase domain-containing protein 4 [OS=Homo sapiens]	0	25.204	23	4	18	4	313	34.8	5.6	54.63	4	0	0	0.776	0.792188	91.16	126.9	73.1	51.67	72.75	Peak Found	High	High	High	High	High	High	High	High	High	1
FALSE	High	Master Protein	O75439	Mitochondrial-processing peptidase subunit beta [OS=Homo sapiens]	0	25.185	20	5	23	5	489	54.3	6.83	59.21	5	0	0	0.596	0.676194	141.87	122.3	77.7	67.89	81.92	High	High	High	High	High	High	Peak Found	Peak Found	High	High	1
FALSE	High	Master Protein	P23921	Ribonucleoside-diphosphate reductase large subunit [OS=Homo sapiens]	0	25.166	11	4	22	4	792	90	7.15	68.32	4	0	0	0.663	0.938649	108.72	129.2	70.8	66.14	87.48	Not Found	High	High	Peak Found	High	Peak Found	High	High	High	High	1
FALSE	High	Master Protein	Q02880	DNA topoisomerase 2-beta [OS=Homo sapiens]	0	25.157	5	5	35	5	1626	183.2	8	87.89	5	0	0	0.783	0.96807	109.93	106	94	76.35	80.77	High	High	High	High	High	High	High	High	High	High	1
FALSE	High	Master Protein	Q13642	Four and a half LIM domains protein 1 [OS=Homo sapiens]	0	25.048	16	4	71	4	323	36.2	8.97	153.04	4	0	0	1.142	0.726517	50.09	100.9	99.1	35.61	52.87	High	High	High	High	High	Not Found	High	High	High	High	1
TRUE	High	Master Protein	P49755	Transmembrane emp24 domain-containing protein 10 [OS=Homo sapiens]	0	25.037	22	3	74	3	219	25	7.44	234.07	3	0	0	0.369	0.00269523	89.96	109.6	90.4	98.14	80.88	High	High	High	High	High	High	High	High	High	High	1
FALSE	High	Master Protein	Q9BXW7	Haloacid dehalogenase-like hydrolase domain-containing 5 [OS=Homo sapiens]	0	24.965	26	5	8	5	423	46.3	8.13	27.73	5	0	0	1.553	0.452781	96.53	72	128	80.6	43.78	High	Peak Found	High	Peak Found	High	Peak Found	High	High	Peak Found	High	1
FALSE	High	Master Protein	O75396	Vesicle-trafficking protein SEC22b [OS=Homo sapiens]	0	24.954	25	4	35	4	215	24.7	8.51	99.54	4	0	0	0.902	0.976575	84.8	105.8	94.2	59.75	22.41	Peak Found	High	High	High	High	High	High	High	High	High	1
FALSE	High	Master Protein	Q14376	UDP-glucose 4-epimerase [OS=Homo sapiens]	0	24.953	28	4	36	4	348	38.3	6.73	109.94	4	0	0	0.666	0.69758	85.86	85.7	114.3	46.22	69.05	High	High	High	High	High	High	High	High	High	High	1
FALSE	High	Master Protein	Q92900	Regulator of nonsense transcripts 1 [OS=Homo sapiens]	0	24.853	8	6	21	6	1129	124.3	6.61	59.9	6	0	0	0.601	0.757939	50.63	120.3	79.7	56.99	37.9	High	High	Peak Found	Peak Found	High	Peak Found	Peak Found	High	High	High	1
FALSE	High	Master Protein	P39060	Collagen alpha-1(XVIII) chain [OS=Homo sapiens]	0	24.804	5	4	50	4	1754	178.1	6.01	172.99	4	0	0	1.107	0.763711	121.49	50.4	149.6	93.12	37.13	High	High	High	High	High	High	High	High	High	High	1
FALSE	High	Master Protein	Q15435	Protein phosphatase 1 regulatory subunit 7 [OS=Homo sapiens]	0	24.792	31	6	10	6	360	41.5	4.91	31.68	6	0	0	1.583	0.419344	117.89	84	116	111.66	65.93	Not Found	Peak Found	Peak Found	High	Not Found	Peak Found	High	High	High	High	1
FALSE	High	Master Protein	P48739	Phosphatidylinositol transfer protein beta isoform [OS=Homo sapiens]	0	24.782	24	4	14	3	271	31.5	6.87	33.44	4	0	1	1.551	0.447265	92.79	80.6	119.4	43.78	47.87	Not Found	Peak Found	High	High	High	High	Peak Found	High	High	High	1
TRUE	High	Master Protein	P02538	Keratin, type II cytoskeletal 6A [OS=Homo sapiens]	0	24.78	10	6	157	2	564	60	8	391.87	6	0	0	100	5.5167e-17			200			Not Found	Not Found	Not Found	Not Found	Not Found	Not Found	Not Found	High	Not Found	Not Found	1
FALSE	High	Master Protein	Q9NYK5	39S ribosomal protein L39, mitochondrial [OS=Homo sapiens]	0	24.779	22	4	25	4	338	38.7	7.65	67.12	4	0	0	0.739	0.861922	100.05	73.4	126.6	73.88	110.82	Not Found	High	High	Peak Found	High	Peak Found	High	High	High	High	1
FALSE	High	Master Protein	Q14019	Coactosin-like protein [OS=Homo sapiens]	0	24.774	35	3	22	3	142	15.9	5.67	56.95	3	0	0	1.473	0.454936	90.59	75.1	124.9	41.84	38.63	Not Found	High	High	High	High	High	High	High	High	High	1
FALSE	High	Master Protein	O94925	Glutaminase kidney isoform, mitochondrial [OS=Homo sapiens]	0	24.733	14	5	22	5	669	73.4	7.77	34.35	5	0	0	0.614	0.611006	82.57	106.2	93.8	83.53	24.77	Not Found	High	High	High	High	Not Found	High	High	High	High	1
FALSE	High	Master Protein	P63151	Serine/threonine-protein phosphatase 2A 55 kDa regulatory subunit B alpha isoform [OS=Homo sapiens]	0	24.695	25	6	21	6	447	51.7	6.2	43.65	6	0	0	1.32	0.645061	95.49	81.5	118.5	61.42	53.44	Peak Found	High	High	High	High	High	High	High	High	High	1
FALSE	High	Master Protein	P19404	NADH dehydrogenase [ubiquinone] flavoprotein 2, mitochondrial [OS=Homo sapiens]	0	24.671	27	5	18	5	249	27.4	8.06	41.52	5	0	0	0.927	0.966342	124.7	91.6	108.4	31.06	70.13	Not Found	High	Peak Found	Peak Found	High	High	High	High	Peak Found	High	1
FALSE	High	Master Protein	P05165	Propionyl-CoA carboxylase alpha chain, mitochondrial [OS=Homo sapiens]	0	24.657	16	6	23	6	728	80	7.52	50.92	6	0	0	0.568	0.585148	119.59	134.3	65.7	33.53	43.06	Peak Found	High	High	High	High	Not Found	High	High	High	Peak Found	1
TRUE	High	Master Protein	P35637	RNA-binding protein FUS [OS=Homo sapiens]	0	24.559	14	4	18	3	526	53.4	9.36	83.79	4	0	1	0.433	0.0154017	81.24	131.6	68.4	49.99	75.22	High	High	High	Not Found	High	High	High	High	High	High	1
FALSE	High	Master Protein	P41250	Glycine--tRNA ligase [OS=Homo sapiens]	0	24.486	15	6	38	6	739	83.1	7.03	89.39	6	0	0	0.817	0.925469	80.2	113.3	86.7	55.39	75.37	High	High	High	High	High	High	High	High	High	High	1
FALSE	High	Master Protein	Q5XKP0	MICOS complex subunit MIC13 [OS=Homo sapiens]	0	24.482	63	3	46	3	118	13.1	9.42	153.5	3	0	0	0.788	0.819235	115.95	183	17	90.87	135.89	High	High	High	High	High	High	High	High	High	High	1
FALSE	High	Master Protein	Q07866	Kinesin light chain 1 [OS=Homo sapiens]	0	24.479	19	6	17	4	573	65.3	6.2	43.95	6	0	1	1.176	0.698892	101.87	90.2	109.8	61.35	88.72	Peak Found	High	Peak Found	High	High	Peak Found	High	High	Peak Found	High	1
FALSE	High	Master Protein	P51452	Dual specificity protein phosphatase 3 [OS=Homo sapiens]	0	24.461	38	5	17	5	185	20.5	7.8	41.13	5	0	0	1.343	0.583345	112.62	94	106	36.74	76.43	Peak Found	High	High	High	Peak Found	Not Found	Peak Found	High	High	High	1
FALSE	High	Master Protein	Q9GZS3	WD repeat-containing protein 61 [OS=Homo sapiens]	0	24.433	30	4	12	4	305	33.6	5.47	39.9	4	0	0	1.453	0.429805	122.45	97.9	102.1	68.61	40.3	Peak Found	High	High	High	High	Not Found	High	High	High	High	1
FALSE	High	Master Protein	P51114	RNA-binding protein FXR1 [OS=Homo sapiens]	0	24.406	13	4	59	4	621	69.7	6.15	147.16	4	0	0	0.538	0.420797	97.26	120.6	79.4	25.22	71.79	Peak Found	High	High	High	High	High	High	High	High	High	1
FALSE	High	Master Protein	Q92747	Actin-related protein 2/3 complex subunit 1A [OS=Homo sapiens]	0	24.405	12	4	58	4	370	41.5	8.18	165.51	4	0	0	0.474	0.188795	81.81	117.1	82.9	83.11	60.7	Not Found	High	High	High	High	High	High	High	High	High	1
FALSE	High	Master Protein	P16219	Short-chain specific acyl-CoA dehydrogenase, mitochondrial [OS=Homo sapiens]	0	24.393	24	6	15	6	412	44.3	7.99	43.1	6	0	0	0.675	0.887901	121.64	106.4	93.6	69.04	40.99	Peak Found	High	High	Peak Found	High	High	High	High	Not Found	High	1
FALSE	High	Master Protein	P24666	Low molecular weight phosphotyrosine protein phosphatase [OS=Homo sapiens]	0	24.322	34	3	46	3	158	18	6.74	137.14	3	0	0	0.706	0.614114	99.09	120.8	79.2	40.6	46.42	Peak Found	High	High	High	High	High	High	High	High	High	1
FALSE	High	Master Protein	P04844	Dolichyl-diphosphooligosaccharide--protein glycosyltransferase subunit 2 [OS=Homo sapiens]	0	24.319	13	5	22	5	631	69.2	5.69	46.79	5	0	0	0.994	0.918299	66.26	81.8	118.2	96.14	25.48	Not Found	High	High	High	High	High	High	High	High	High	1
FALSE	High	Master Protein	Q13162	Peroxiredoxin-4 [OS=Homo sapiens]	0	24.316	32	6	51	5	271	30.5	6.29	83.92	6	0	0	1.971	0.149144	104.15	136.5	63.5	90.1	76.74	Not Found	High	High	High	High	High	High	High	High	High	1
FALSE	High	Master Protein	P16152	Carbonyl reductase [NADPH] 1 [OS=Homo sapiens]	0	24.274	35	6	38	6	277	30.4	8.32	67.69	6	0	0	0.525	0.560429	86.3	90.9	109.1	76.71	39.45	Peak Found	High	High	High	High	Not Found	High	High	High	High	1
FALSE	High	Master Protein	O60841	Eukaryotic translation initiation factor 5B [OS=Homo sapiens]	0	24.261	7	5	16	5	1220	138.7	5.49	56.87	5	0	0	0.953	0.932767	88.15	109.4	90.6	45.46	10.56	Peak Found	High	High	High	High	High	High	High	High	High	1
FALSE	High	Master Protein	P55196	Afadin [OS=Homo sapiens]	0	24.245	4	5	13	5	1824	206.7	6.47	43.3	5	0	0	1.132	0.785569	45.9	46.1	153.9	105.21	55.2	Not Found	High	High	Peak Found	High	High	High	High	High	High	1
FALSE	High	Master Protein	P36551	Oxygen-dependent coproporphyrinogen-III oxidase, mitochondrial [OS=Homo sapiens]	0	24.227	22	6	28	6	454	50.1	8.25	53.76	6	0	0	0.927	0.947474	136.64	142.5	57.5	178.18	110.8	High	High	High	Peak Found	High	Peak Found	High	High	High	High	1
FALSE	High	Master Protein	Q16134	Electron transfer flavoprotein-ubiquinone oxidoreductase, mitochondrial [OS=Homo sapiens]	0	24.16	19	6	18	6	617	68.5	7.55	54.53	6	0	0	0.512	0.140045	82.13	127	73	38.72	63.62	High	High	High	High	Peak Found	Peak Found	High	High	High	High	1
FALSE	High	Master Protein	Q01995	Transgelin [OS=Homo sapiens]	0	24.046	19	3	141	3	201	22.6	8.84	307.22	3	0	0	1.56	0.15954	103.5	93.3	106.7	30.48	94.91	Not Found	High	High	High	High	High	High	High	High	High	1
FALSE	High	Master Protein	P21333	Filamin-A [OS=Homo sapiens]	0	24.044	5	6	18	4	2647	280.6	6.06	53.4	6	0	0	0.3	0.291813	128.15	153.9	46.1	115.45	6.25	Not Found	High	High	High	High	Not Found	High	High	High	Not Found	1
FALSE	High	Master Protein	P04080	Cystatin-B [OS=Homo sapiens]	0	24.041	70	4	20	4	98	11.1	7.56	42.43	4	0	0	2.48	0.426989	29.5	61.4	138.6	1.04	159.94	Not Found	High	Not Found	High	Not Found	Not Found	High	High	High	Not Found	1	Acetyl [N-Term]
FALSE	High	Master Protein	P30050	60S ribosomal protein L12 [OS=Homo sapiens]	0	24.029	30	3	67	3	165	17.8	9.42	184.64	3	0	0	1.024	0.866632	101.77	90.4	109.6	45.75	82.49	Not Found	High	High	High	High	Peak Found	High	High	High	High	1
FALSE	High	Master Protein	Q9Y6M1	Insulin-like growth factor 2 mRNA-binding protein 2 [OS=Homo sapiens]	0	24.003	13	6	27	6	599	66.1	8.46	69.93	6	0	0	1.016	0.904134	102.83	84.6	115.4	31.34	79.24	Not Found	High	High	High	High	High	High	High	High	Peak Found	1
FALSE	High	Master Protein	P46783	40S ribosomal protein S10 [OS=Homo sapiens]	0	23.978	33	6	40	6	165	18.9	10.15	96.78	6	0	0	0.702	0.59991	98.02	103.5	96.5	20.47	51.61	High	High	High	High	High	High	High	High	High	High	1
FALSE	High	Master Protein	Q07157	Tight junction protein ZO-1 [OS=Homo sapiens]	0	23.975	6	7	20	7	1748	195.3	6.7	46.06	7	0	0	1.566	0.440595	65.1	81.8	118.2	50.79	26.86	Peak Found	High	High	High	High	High	High	High	High	High	1
FALSE	High	Master Protein	O43175	D-3-phosphoglycerate dehydrogenase [OS=Homo sapiens]	0	23.959	14	5	76	5	533	56.6	6.71	206.02	5	0	0	0.597	0.463794	72.4	107.8	92.2	51.86	33.61	High	High	High	High	High	High	High	High	High	High	1
FALSE	High	Master Protein	O60749	Sorting nexin-2 [OS=Homo sapiens]	0	23.927	12	4	30	4	519	58.4	5.12	109.36	4	0	0	0.747	0.946799	104.16	95.6	104.4	79.62	12.65	Not Found	High	High	Peak Found	High	Not Found	High	High	High	High	1
FALSE	High	Master Protein	Q9UBG0	C-type mannose receptor 2 [OS=Homo sapiens]	0	23.916	5	3	20	3	1479	166.6	5.83	48.18	3	0	0	1.381	0.507231	103.93	42.6	157.4	71.25	73.69	Not Found	High	High	High	High	Peak Found	High	High	High	High	1
FALSE	High	Master Protein	P61201	COP9 signalosome complex subunit 2 [OS=Homo sapiens]	0	23.893	13	4	16	4	443	51.6	5.53	47.87	4	0	0	0.738	0.849005	78.97	118.1	81.9	58.31	35.14	High	High	High	High	High	Peak Found	High	High	High	High	1
FALSE	High	Master Protein	Q9UHD1	Cysteine and histidine-rich domain-containing protein 1 [OS=Homo sapiens]	0	23.889	23	4	60	4	332	37.5	7.87	152.2	4	0	0	0.684	0.726303	70.05	111.8	88.2	38.8	31.02	High	High	High	High	High	Peak Found	High	High	High	High	1
FALSE	High	Master Protein	Q9UJS0	Electrogenic aspartate/glutamate antiporter SLC25A13, mitochondrial [OS=Homo sapiens]	0	23.885	15	8	39	3	675	74.1	8.62	68.41	8	0	0	0.616	0.875204	91.78	121.3	78.7	101.98	113.37	Not Found	High	Peak Found	High	Peak Found	Peak Found	High	High	High	High	1
FALSE	High	Master Protein	P25788	Proteasome subunit alpha type-3 [OS=Homo sapiens]	0	23.858	25	6	26	6	255	28.4	5.33	50.74	6	0	0	1.064	0.847595	113.14	100.5	99.5	91.83	82.77	Not Found	High	Peak Found	High	High	High	High	High	Not Found	High	1
FALSE	High	Master Protein	P33993	DNA replication licensing factor MCM7 [OS=Homo sapiens]	0	23.843	13	6	11	6	719	81.3	6.46	18.8	6	0	0	0.494	0.597946	58.2	129	71	85.91	78.46	Not Found	Peak Found	Peak Found	Peak Found	High	Peak Found	Peak Found	High	Peak Found	Peak Found	1
FALSE	High	Master Protein	Q15843	NEDD8 [OS=Homo sapiens]	0	23.835	35	3	25	3	81	9.1	8.43	60.96	3	0	0	0.656	0.463794	78.94	121	79	50.74	54.17	Not Found	High	High	High	High	High	High	High	High	High	1
FALSE	High	Master Protein	Q13409	Cytoplasmic dynein 1 intermediate chain 2 [OS=Homo sapiens]	0	23.825	12	5	33	4	638	71.4	5.2	81.02	5	0	1	1.031	0.888775	84.24	95.8	104.2	91.72	48.8	High	High	High	Peak Found	High	Peak Found	High	High	High	High	1
FALSE	High	Master Protein	Q02750	Dual specificity mitogen-activated protein kinase kinase 1 [OS=Homo sapiens]	0	23.793	18	3	28	3	393	43.4	6.62	81.72	3	0	0	0.879	0.973199	62.37	110.9	89.1	33.96	58.22	Peak Found	High	High	High	High	High	High	High	High	High	1
FALSE	High	Master Protein	O75251	NADH dehydrogenase [ubiquinone] iron-sulfur protein 7, mitochondrial [OS=Homo sapiens]	0	23.793	23	2	80	2	213	23.5	9.99	194.13	2	0	0	0.435	0.353663	43.47	142.2	57.8	44.98	20.45	Peak Found	High	High	High	High	Not Found	High	High	High	High	1
FALSE	High	Master Protein	P61160	Actin-related protein 2 [OS=Homo sapiens]	0	23.781	17	4	64	4	394	44.7	6.74	189.99	4	0	0	0.729	0.67721	63.49	107.6	92.4	30.22	27.57	High	High	High	Peak Found	High	High	High	High	High	High	1
FALSE	High	Master Protein	Q58FF7	Putative heat shock protein HSP 90-beta-3 [OS=Homo sapiens]	0	23.775	8	3	380	1	597	68.3	4.79	950.3	3	0	0								Not Found	Not Found	Not Found	Not Found	Not Found	Not Found	High	Not Found	Not Found	Not Found	1
FALSE	High	Master Protein	Q6P5Q4	Leiomodin-2 [OS=Homo sapiens]	0	23.743	14	4	42	4	547	61.6	5.78	105.8	4	0	0	1.389	0.567494	122.62	60	140	84.59	78.69	High	High	High	High	High	Not Found	High	High	High	Peak Found	1
FALSE	High	Master Protein	O95336	6-phosphogluconolactonase [OS=Homo sapiens]	0	23.674	29	4	12	4	258	27.5	6.05	27.65	4	0	0	0.568	0.867816	400.83	196.8	3.2	134.7	170.22	Not Found	Not Found	Not Found	High	High	Not Found	Peak Found	High	High	High	1
FALSE	High	Master Protein	O75533	Splicing factor 3B subunit 1 [OS=Homo sapiens]	0	23.671	5	4	32	4	1304	145.7	7.09	83.19	4	0	0	0.687	0.904582	91.63	141.3	58.7	65.28	70.38	High	High	High	High	High	High	High	High	High	High	1
TRUE	High	Master Protein	P55884	Eukaryotic translation initiation factor 3 subunit B [OS=Homo sapiens]	0	23.629	10	5	26	5	814	92.4	5	66.11	5	0	0	2.89	0.0256794	80.75	44.6	155.4	69.72	64.4	High	High	High	High	High	Peak Found	Peak Found	High	High	High	1
FALSE	High	Master Protein	P62906	60S ribosomal protein L10a [OS=Homo sapiens]	0	23.56	18	3	135	3	217	24.8	9.94	332.62	3	0	0	1.337	0.416597	104.59	81.6	118.4	100.72	29.47	Peak Found	High	High	High	High	High	High	High	High	High	1
TRUE	High	Master Protein	P63208	S-phase kinase-associated protein 1 [OS=Homo sapiens]	0	23.554	48	4	34	4	163	18.6	4.54	94.73	4	0	0	0.367	0.0345499	92.19	66.1	133.9	80.2	61.07	High	High	High	High	High	Not Found	High	High	High	High	1
FALSE	High	Master Protein	Q99729	Heterogeneous nuclear ribonucleoprotein A/B [OS=Homo sapiens]	0	23.546	20	6	65	5	332	36.2	8.21	98.61	6	0	0	0.781	0.806284	103.73	100.3	99.7	85.64	82.07	Peak Found	High	High	High	High	High	High	High	High	High	1
FALSE	High	Master Protein	O14579	Coatomer subunit epsilon [OS=Homo sapiens]	0	23.534	27	4	23	4	308	34.5	5.12	62.16	4	0	0	1.16	0.722221	64.29	101.6	98.4	10.84	17.87	Not Found	High	High	High	Peak Found	High	High	High	High	Peak Found	1
FALSE	High	Master Protein	P23258	Tubulin gamma-1 chain [OS=Homo sapiens]	0	23.492	26	6	18	6	451	51.1	6.14	43.62	6	0	0	0.295	0.26794	129.92	148.3	51.7	38.25	71.86	Peak Found	High	High	High	High	Peak Found	Not Found	High	High	High	1
FALSE	High	Master Protein	B5ME19	Eukaryotic translation initiation factor 3 subunit C-like protein [OS=Homo sapiens]	0	23.479	8	6	30	6	914	105.4	5.64	64.85	6	0	0	0.865	0.975284	105.33	114.3	85.7	42.06	90.84	Peak Found	High	High	Peak Found	High	High	High	High	High	High	1
FALSE	High	Master Protein	P23246	Splicing factor, proline- and glutamine-rich [OS=Homo sapiens]	0	23.468	10	4	59	4	707	76.1	9.44	118.18	4	0	0	0.703	0.82957	97.14	35.5	164.5	64.71	36.83	Peak Found	High	High	High	High	High	High	High	High	High	1
TRUE	High	Master Protein	P63220	40S ribosomal protein S21 [OS=Homo sapiens]	0	23.456	36	3	36	3	83	9.1	8.5	64.38	3	0	0	2.451	0.0822236	114.78	63.3	136.7	105.75	54.64	Peak Found	High	High	Peak Found	High	High	High	High	High	High	1	Acetyl [N-Term]
FALSE	High	Master Protein	Q9BTT0	Acidic leucine-rich nuclear phosphoprotein 32 family member E [OS=Homo sapiens]	0	23.455	25	4	33	4	268	30.7	3.85	94.22	4	0	0	1.519	0.268918	103.6	67.5	132.5	54.36	52.01	Peak Found	High	High	High	High	High	High	High	High	High	1
FALSE	High	Master Protein	Q14839	Chromodomain-helicase-DNA-binding protein 4 [OS=Homo sapiens]	0	23.425	5	5	14	5	1912	217.9	5.86	30.49	5	0	0	0.878	0.988599	41.65	162.9	37.1	58.16	34.22	Not Found	High	Peak Found	High	High	Peak Found	High	High	High	High	1
FALSE	High	Master Protein	O14787	Transportin-2 [OS=Homo sapiens]	0	23.302	10	5	36	2	897	101.3	5.01	81.04	5	0	0	0.531	0.825043	105.85	67.4	132.6	107.47	69.59	Peak Found	High	High	High	High	Peak Found	High	High	High	High	1
FALSE	High	Master Protein	O14907	Tax1-binding protein 3 [OS=Homo sapiens]	0	23.298	39	3	30	3	124	13.7	8.48	90.68	3	0	0	1.895	0.145036	92.37	57.5	142.5	55.01	39.09	Not Found	High	High	High	High	Peak Found	High	High	High	High	1
FALSE	High	Master Protein	P57772	Selenocysteine-specific elongation factor [OS=Homo sapiens]	0	23.285	18	6	14	6	596	65.3	8.35	42.47	6	0	0	1.093	0.857297	114.53	106	94	65.51	66.39	Not Found	High	High	High	High	Peak Found	High	High	Peak Found	High	1
FALSE	High	Master Protein	Q09161	Nuclear cap-binding protein subunit 1 [OS=Homo sapiens]	0	23.212	10	5	28	5	790	91.8	6.43	74.48	5	0	0	0.908	0.954709	122.12	112.7	87.3	82.24	82.84	Not Found	High	High	High	High	High	High	High	High	High	1
TRUE	High	Master Protein	P54577	Tyrosine--tRNA ligase, cytoplasmic [OS=Homo sapiens]	0	23.143	15	5	19	5	528	59.1	7.05	45.87	5	0	0	0.258	0.00830781	140.79	177.9	22.1	57.56	110.07	High	Peak Found	High	Peak Found	High	Peak Found	High	High	High	High	1
FALSE	High	Master Protein	P02545	Prelamin-A/C [OS=Homo sapiens]	0	22.999	14	7	36	7	664	74.1	7.02	56.19	7	0	0	2.245	0.333862	122.03	74	126	88.91	119.63	Peak Found	High	High	High	High	Not Found	High	High	High	High	1
FALSE	High	Master Protein	P82930	28S ribosomal protein S34, mitochondrial [OS=Homo sapiens]	0	22.957	38	6	22	6	218	25.6	9.98	36.49	6	0	0	0.511	0.602133	137.88	127.3	72.7	49.03	48.88	Not Found	High	High	High	High	Peak Found	High	High	High	High	1
TRUE	High	Master Protein	P52292	Importin subunit alpha-1 [OS=Homo sapiens]	0	22.951	11	3	18	3	529	57.8	5.4	70.53	3	0	0	0.342	0.058803	133.79	140.9	59.1	118.21	44.99	Not Found	High	High	High	High	High	High	High	High	High	1
FALSE	High	Master Protein	P23142	Fibulin-1 [OS=Homo sapiens]	0	22.931	15	5	8	5	703	77.2	5.22	19.05	5	0	0	0.303	0.329935	0	153.3	46.7	60.81	61.57	Peak Found	Not Found	Not Found	High	High	Not Found	High	Not Found	High	High	1
FALSE	High	Master Protein	P0DP23	Calmodulin-1 [OS=Homo sapiens]	0	22.915	29	3	44	3	149	16.8	4.22	78.6	3	0	0	1.11	0.738158	129.94	95.1	104.9	80.35	37.24	High	High	High	High	Peak Found	High	High	High	High	High	1
FALSE	High	Master Protein	O15327	Inositol polyphosphate 4-phosphatase type II [OS=Homo sapiens]	0	22.84	10	5	30	5	924	104.7	6.27	85.27	5	0	0	0.549	0.459731	103.13	158.8	41.2	20.05	93.41	Not Found	High	High	High	High	High	High	High	High	High	1
FALSE	High	Master Protein	P32322	Pyrroline-5-carboxylate reductase 1, mitochondrial [OS=Homo sapiens]	0	22.832	17	3	37	2	319	33.3	7.61	77.85	3	0	0	0.623	0.834191	102.99	91.3	108.7	77.51	92.52	Not Found	High	High	High	High	High	High	High	High	High	1
FALSE	High	Master Protein	P43155	Carnitine O-acetyltransferase [OS=Homo sapiens]	0	22.825	15	5	12	5	626	70.8	8.44	17.85	5	0	0	1.659	0.675942	126	45.3	154.7	66.39	128.61	Not Found	High	High	Peak Found	Peak Found	Not Found	Peak Found	High	High	High	1
TRUE	High	Master Protein	Q15121	Astrocytic phosphoprotein PEA-15 [OS=Homo sapiens]	0	22.819	35	3	36	3	130	15	5.02	97.72	3	0	0	0.421	0.15093	76.51	136	64	67.28	110.9	High	High	High	High	High	Peak Found	High	High	Peak Found	High	1
FALSE	High	Master Protein	Q9HDC9	Adipocyte plasma membrane-associated protein [OS=Homo sapiens]	0	22.636	20	4	18	4	416	46.5	6.16	56.38	4	0	0	0.644	0.810542	59.47	26.3	173.7	127.87	20.69	Not Found	High	High	High	High	Not Found	High	High	High	High	1
TRUE	High	Master Protein	P10253	Lysosomal alpha-glucosidase [OS=Homo sapiens]	0	22.592	8	3	34	3	952	105.3	6	95.28	3	0	0	0.117	2.25652e-07	110.41	154.4	45.6	17.42	67.33	Peak Found	High	High	High	High	High	High	High	High	High	1
FALSE	High	Master Protein	Q9P265	Disco-interacting protein 2 homolog B [OS=Homo sapiens]	0	22.49	4	3	39	3	1576	171.4	8.09	108.47	3	0	0	0.584	0.67721	114.72	163.5	36.5	78.62	78.56	High	High	High	High	High	High	High	High	High	High	1
FALSE	High	Master Protein	P51858	Hepatoma-derived growth factor [OS=Homo sapiens]	0	22.487	32	4	47	4	240	26.8	4.73	119.88	4	0	0	0.899	0.975284	87.74	116.6	83.4	53.47	44.39	High	High	High	High	High	High	High	High	High	High	1
FALSE	High	Master Protein	P58546	Myotrophin [OS=Homo sapiens]	0	22.485	40	3	22	3	118	12.9	5.52	77.27	3	0	0	0.895	0.97866	77.96	121.6	78.4	23.07	51.58	Not Found	High	High	High	High	Not Found	High	High	High	High	1
FALSE	High	Master Protein	O43237	Cytoplasmic dynein 1 light intermediate chain 2 [OS=Homo sapiens]	0	22.402	19	6	21	5	492	54.1	6.38	36.56	6	0	0	1.431	0.535204	180.41	26.7	173.3	31.16	47.63	Not Found	Peak Found	Not Found	Not Found	High	Not Found	Peak Found	High	High	High	1
FALSE	High	Master Protein	P02462	Collagen alpha-1(IV) chain [OS=Homo sapiens]	0	22.288	2	2	35	2	1669	160.5	8.28	94.05	2	0	0	0.767	0.786875	93.56	107.7	92.3	58.13	22.79	High	High	High	High	High	High	High	High	High	High	1
FALSE	High	Master Protein	O15144	Actin-related protein 2/3 complex subunit 2 [OS=Homo sapiens]	0	22.24	22	6	45	6	300	34.3	7.36	71.98	6	0	0	0.986	0.937916	117.56	94.4	105.6	67.73	62.33	Peak Found	High	High	High	High	High	High	High	High	High	1
FALSE	High	Master Protein	P20042	Eukaryotic translation initiation factor 2 subunit 2 [OS=Homo sapiens]	0	22.231	30	6	7	6	333	38.4	5.8	15.27	6	0	0	1.662	0.596941	115.03	143	57	32.25	105.66	High	Not Found	Not Found	High	Peak Found	Peak Found	Peak Found	High	High	High	1
FALSE	High	Master Protein	P30519	Heme oxygenase 2 [OS=Homo sapiens]	0	22.231	26	4	13	4	316	36	5.41	28.34	4	0	0	0.751	0.920671	118.2	99.2	100.8	96.19	71.6	Not Found	Peak Found	High	High	High	Peak Found	High	High	High	High	1
FALSE	High	Master Protein	Q9NVH1	DnaJ homolog subfamily C member 11 [OS=Homo sapiens]	0	22.211	15	4	14	4	559	63.2	8.4	37.67	4	0	0	1.596	0.476835	97.19	79.4	120.6	60.93	18.95	Not Found	High	High	High	Peak Found	High	High	High	High	High	1
TRUE	High	Master Protein	Q96AE4	Far upstream element-binding protein 1 [OS=Homo sapiens]	0	22.16	10	4	70	3	644	67.5	7.61	88.68	4	0	0	0.098	0.0240052	143.94	127.6	72.4	139.65	139.77	Not Found	Peak Found	Not Found	High	Peak Found	Peak Found	High	High	High	Not Found	1
FALSE	High	Master Protein	O94979	Protein transport protein Sec31A [OS=Homo sapiens]	0	22.156	6	4	24	4	1220	132.9	6.89	59.84	4	0	0	0.422	0.241721	108.36	151.5	48.5	69.73	76.45	High	High	High	High	High	High	High	High	High	High	1
FALSE	High	Master Protein	Q9ULA0	Aspartyl aminopeptidase [OS=Homo sapiens]	0	22.116	11	4	15	4	485	53.4	7.58	48.24	4	0	0	0.871	0.964457	73.19	87.6	112.4	43.75	84.96	Not Found	High	High	High	High	High	High	High	Not Found	High	1
FALSE	High	Master Protein	P35998	26S proteasome regulatory subunit 7 [OS=Homo sapiens]	0	21.977	18	5	30	5	433	48.6	5.95	80.77	5	0	0	1.234	0.671358	53.45	91.6	108.4	21.84	67.02	Not Found	High	High	High	High	Peak Found	High	High	High	High	1
FALSE	High	Master Protein	Q92905	COP9 signalosome complex subunit 5 [OS=Homo sapiens]	0	21.976	22	5	34	5	334	37.6	6.54	74.13	5	0	0	0.866	0.98571	105.02	148	52	73.66	29.61	High	High	High	High	High	High	Peak Found	High	High	High	1
FALSE	High	Master Protein	Q14157	Ubiquitin-associated protein 2-like [OS=Homo sapiens]	0	21.946	8	4	40	4	1087	114.5	7.11	91.35	4	0	0	1.965	0.168001	123.24	106.8	93.2	93.57	43.85	High	High	High	High	Peak Found	High	High	High	High	High	1
TRUE	High	Master Protein	Q9BUT1	3-hydroxybutyrate dehydrogenase type 2 [OS=Homo sapiens]	0	21.944	23	4	29	4	245	26.7	7.65	69.83	4	0	0	3.479	0.0171884	139.87	53.6	146.4	124.25	33.59	Not Found	High	High	High	High	High	High	High	High	High	1
FALSE	High	Master Protein	P42025	Beta-centractin [OS=Homo sapiens]	0	21.928	17	4	91	2	376	42.3	6.4	212.12	4	0	0	0.727	0.92484	51.54	117.7	82.3	46.62	72.45	High	High	High	High	High	High	High	High	High	High	1
TRUE	High	Master Protein	P60660	Myosin light polypeptide 6 [OS=Homo sapiens]	0	21.9	45	4	12	3	151	16.9	4.65	30.64	4	0	0	0.256	7.26285e-06	71.58	161.5	38.5	33.61	34.17	Not Found	High	High	High	Peak Found	High	Peak Found	High	Peak Found	Peak Found	1
FALSE	High	Master Protein	Q9Y2X3	Nucleolar protein 58 [OS=Homo sapiens]	0	21.9	15	5	28	5	529	59.5	8.92	76.97	5	0	0	0.654	0.911953	74.84	103.8	96.2	31.33	107.48	Not Found	High	High	High	High	Not Found	High	High	High	High	1
TRUE	High	Master Protein	Q9UKA9	Polypyrimidine tract-binding protein 2 [OS=Homo sapiens]	0	21.892	15	3	17	3	531	57.5	8.66	48.56	3	0	0	20.99	3.0526e-05	34.19	5.7	194.3		96.18	High	Not Found	Not Found	High	Peak Found	High	High	High	High	Not Found	1
FALSE	High	Master Protein	Q13526	Peptidyl-prolyl cis-trans isomerase NIMA-interacting 1 [OS=Homo sapiens]	0	21.851	36	4	52	4	163	18.2	8.82	146.94	4	0	0	0.995	0.918299	111.22	88.3	111.7	135.99	43.6	Peak Found	High	High	High	High	Peak Found	High	High	High	High	1
FALSE	High	Master Protein	P46109	Crk-like protein [OS=Homo sapiens]	0	21.843	16	3	16	3	303	33.8	6.74	52.14	3	0	0	0.823	0.938988	63.85	97.2	102.8	66.49	26.66	Not Found	High	High	High	High	High	High	High	High	High	1
FALSE	High	Master Protein	P09525	Annexin A4 [OS=Homo sapiens]	0	21.832	22	5	17	4	319	35.9	6.13	23.01	5	0	0	0.696	0.912253	112.21	157.8	42.2	47.26	99.48	Peak Found	High	High	Peak Found	High	Peak Found	High	High	Peak Found	High	1
FALSE	High	Master Protein	P49903	Selenide, water dikinase 1 [OS=Homo sapiens]	0	21.828	27	5	28	5	392	42.9	5.97	65.27	5	0	0	0.569	0.584679	106.75	160.7	39.3	54.39	22.36	Not Found	High	High	High	High	High	High	High	High	High	1
FALSE	High	Master Protein	P02787	Serotransferrin [OS=Homo sapiens]	0	21.788	12	4	14	4	698	77	7.12	39.66	4	0	0	0.672	0.912253	114.62	119.5	80.5	79.3	54.54	Peak Found	Peak Found	High	High	Not Found	Peak Found	High	High	Not Found	Peak Found	1
FALSE	High	Master Protein	Q9UHB9	Signal recognition particle subunit SRP68 [OS=Homo sapiens]	0	21.752	12	4	16	4	627	70.7	8.56	51.03	4	0	0	0.962	0.925469	49.31	86.7	113.3	58.96	33.12	Peak Found	Peak Found	High	High	High	High	High	High	High	High	1
FALSE	High	Master Protein	Q00341	Vigilin [OS=Homo sapiens]	0	21.702	10	6	29	6	1268	141.4	6.87	65.82	6	0	0	0.607	0.606875	86.41	119.7	80.3	42.81	71.71	High	High	High	High	High	High	High	High	High	High	1
FALSE	High	Master Protein	Q16576	Histone-binding protein RBBP7 [OS=Homo sapiens]	0	21.661	11	3	18	1	425	47.8	5.05	56.01	3	0	0	0.738	0.832792	56.09	121.6	78.4	30.66	74.55	High	High	High	Peak Found	High	Not Found	High	High	High	High	1
FALSE	High	Master Protein	Q9NVA2	Septin-11 [OS=Homo sapiens]	0	21.659	12	3	46	1	429	49.4	6.81	124.22	3	0	2	0.907	0.957401	58.08	108.9	91.1	38.45	58.51	High	High	High	High	High	High	High	High	High	High	1
FALSE	High	Master Protein	O60784	Target of Myb protein 1 [OS=Homo sapiens]	0	21.657	15	4	16	4	492	53.8	4.7	54.74	4	0	0	0.817	0.957826	36.24	105.9	94.1	54.91	43.61	Not Found	High	High	High	High	High	High	High	High	High	1	Acetyl [N-Term]
FALSE	High	Master Protein	O43169	Cytochrome b5 type B [OS=Homo sapiens]	0	21.581	41	3	16	3	150	16.7	4.97	51.14	3	0	0	1.389	0.341428	44.75	81.8	118.2	13.05	61.45	Not Found	High	High	High	High	High	High	High	High	High	1
FALSE	High	Master Protein	P22061	Protein-L-isoaspartate(D-aspartate) O-methyltransferase [OS=Homo sapiens]	0	21.579	37	4	18	4	227	24.6	7.21	43.97	4	0	0	1.094	0.832792	121.54	63.1	136.9	51.19	75.94	High	High	High	High	Peak Found	Peak Found	High	High	High	High	1
FALSE	High	Master Protein	Q8WWI1	LIM domain only protein 7 [OS=Homo sapiens]	0	21.57	5	4	14	4	1683	192.6	8.09	39.65	4	0	0	0.91	0.945094	120.85	123.7	76.3	179.76	130.54	High	Peak Found	High	Peak Found	High	High	High	High	High	High	1
TRUE	High	Master Protein	Q96AB3	Isochorismatase domain-containing protein 2 [OS=Homo sapiens]	0	21.569	17	2	178	2	205	22.3	7.77	423.39	2	0	0	0.31	0.000213751	130.17	171.3	28.7	51.55	58.58	High	High	High	High	High	High	High	High	High	High	1
FALSE	High	Master Protein	P49902	Cytosolic purine 5'-nucleotidase [OS=Homo sapiens]	0	21.565	15	5	15	5	561	64.9	6.14	41.21	5	0	0	1.139	0.795101	86.65	146	54	49.49	100.14	Not Found	High	High	High	High	High	High	High	High	High	1
FALSE	High	Master Protein	P15374	Ubiquitin carboxyl-terminal hydrolase isozyme L3 [OS=Homo sapiens]	0	21.552	35	3	10	3	230	26.2	4.92	40.93	3	0	0	0.41	0.546614	75.21	103.3	96.7	53.76	60.62	Not Found	High	High	High	High	Peak Found	High	High	High	High	1
FALSE	High	Master Protein	Q8TC12	Retinol dehydrogenase 11 [OS=Homo sapiens]	0	21.504	27	3	9	3	318	35.4	8.82	33.64	3	0	0	0.306	0.463313	0	155.6	44.4		9.63	Not Found	Not Found	High	High	High	Not Found	High	High	High	High	1
FALSE	High	Master Protein	Q12849	G-rich sequence factor 1 [OS=Homo sapiens]	0	21.458	16	4	22	4	480	53.1	6.19	45.08	4	0	0	0.316	0.333628	106.9	152.2	47.8	83.81	107.53	Peak Found	High	High	High	High	High	High	High	High	High	1
FALSE	High	Master Protein	P27708	CAD protein [OS=Homo sapiens]	0	21.446	3	4	5	4	2225	242.8	6.46	16.31	4	0	0	1.233	0.88118	44.47	110.5	89.5	139.89	49.91	Not Found	Peak Found	High	Peak Found	Not Found	High	Not Found	High	Not Found	High	1
FALSE	High	Master Protein	Q9BRJ2	39S ribosomal protein L45, mitochondrial [OS=Homo sapiens]	0	21.41	27	5	25	5	306	35.3	9.03	44.95	5	0	0	0.767	0.931936	130.18	148.2	51.8	46.5	109.68	Not Found	High	High	High	High	Peak Found	Peak Found	High	High	High	1
FALSE	High	Master Protein	P07203	Glutathione peroxidase 1 [OS=Homo sapiens]	0	21.393	30	4	23	4	203	22.1	6.55	73.91	4	0	0	1.006	0.898022	83.08	69.6	130.4	64.99	46.02	Peak Found	High	High	High	High	High	High	High	High	High	1
TRUE	High	Master Protein	P20674	Cytochrome c oxidase subunit 5A, mitochondrial [OS=Homo sapiens]	0	21.369	11	2	33	2	150	16.8	6.79	100.37	2	0	0	0.277	3.41841e-05	85.23	159.5	40.5	47.4	109.55	Not Found	High	High	High	High	Peak Found	High	Peak Found	High	High	1
FALSE	High	Master Protein	Q7Z460	CLIP-associating protein 1 [OS=Homo sapiens]	0	21.369	6	5	12	4	1538	169.3	9.03	36.37	5	0	1	1.531	0.451502	26.78	182.9	17.1	58.48	104.32	Not Found	High	High	High	High	Peak Found	High	High	Not Found	High	1
FALSE	High	Master Protein	P36405	ADP-ribosylation factor-like protein 3 [OS=Homo sapiens]	0	21.348	32	3	53	3	182	20.4	7.24	172.1	3	0	0	1.135	0.73603	72.41	109	91	63.67	35.15	High	High	High	High	High	High	High	High	High	High	1
TRUE	High	Master Protein	O43396	Thioredoxin-like protein 1 [OS=Homo sapiens]	0	21.336	27	5	43	5	289	32.2	4.96	117.39	5	0	0	0.327	0.00369753	133.24	112.9	87.1	129.23	71.96	High	High	High	High	High	High	High	High	High	High	1
TRUE	High	Master Protein	P40763	Signal transducer and activator of transcription 3 [OS=Homo sapiens]	0	21.331	9	4	9	4	770	88	6.3	24.43	4	0	0	2.654	0.110794	0	143.3	56.7	37.15		Not Found	Peak Found	High	Peak Found	Peak Found	High	High	High	Not Found	Not Found	1
FALSE	High	Master Protein	P13861	cAMP-dependent protein kinase type II-alpha regulatory subunit [OS=Homo sapiens]	0	21.299	12	3	55	3	404	45.5	5.07	103.68	3	0	0	1.142	0.75487	111.69	110.9	89.1	49.52	79.23	Peak Found	High	High	High	High	High	High	High	High	High	1
TRUE	High	Master Protein	P53990	IST1 homolog [OS=Homo sapiens]	0	21.228	13	4	7	4	364	39.7	5.35	23.7	4	0	0	0.234	0.0733435	66.89	157.4	42.6	47.18	7.37	Peak Found	Peak Found	Peak Found	Not Found	High	High	Not Found	High	Not Found	Not Found	1
FALSE	High	Master Protein	Q15738	Sterol-4-alpha-carboxylate 3-dehydrogenase, decarboxylating [OS=Homo sapiens]	0	21.195	15	3	34	3	373	41.9	8.06	81.48	3	0	0	0.603	0.511039	69.97	121.6	78.4	70.13	35.38	Peak Found	High	High	High	High	High	High	High	High	High	1
TRUE	High	Master Protein	Q8N163	Cell cycle and apoptosis regulator protein 2 [OS=Homo sapiens]	0	21.188	9	5	10	5	923	102.8	5.22	34.26	5	0	0	0.152	0.00276952	117.69	99.8	100.2	54.33	63.06	Not Found	High	Not Found	High	Peak Found	Not Found	High	High	High	Peak Found	1
FALSE	High	Master Protein	Q32MK0	Myosin light chain kinase 3 [OS=Homo sapiens]	0	21.188	6	3	64	3	819	88.3	6.11	132.85	3	0	0	0.668	0.861944	65.68	108.5	91.5	48.07	25.96	High	High	High	High	High	High	High	High	High	High	1
FALSE	High	Master Protein	O95169	NADH dehydrogenase [ubiquinone] 1 beta subcomplex subunit 8, mitochondrial [OS=Homo sapiens]	0	21.184	24	3	32	3	186	21.8	6.8	67.68	3	0	0	0.56	0.617493	113.61	144.4	55.6	38.12	56.63	High	High	High	High	High	High	High	High	High	High	1
FALSE	High	Master Protein	P31689	DnaJ homolog subfamily A member 1 [OS=Homo sapiens]	0	21.177	15	4	18	4	397	44.8	7.08	48.84	4	0	0	1.139	0.730062	103.45	113.2	86.8	69.63	28.1	Peak Found	High	High	High	Peak Found	High	High	High	High	High	1
FALSE	High	Master Protein	Q6XQN6	Nicotinate phosphoribosyltransferase [OS=Homo sapiens]	0	21.13	19	5	17	5	538	57.5	5.68	55.31	5	0	0	0.897	0.966267	60.37	107.2	92.8	25.19	46.65	High	High	High	High	High	High	Peak Found	High	High	High	1
FALSE	High	Master Protein	Q7Z3D6	D-glutamate cyclase, mitochondrial [OS=Homo sapiens]	0	21.117	12	4	28	4	616	66.4	6.79	80.7	4	0	0	1.475	0.452955	115.49	69.2	130.8	41.92	88.1	Peak Found	High	High	High	High	Peak Found	High	High	High	High	1
TRUE	High	Master Protein	P23284	Peptidyl-prolyl cis-trans isomerase B [OS=Homo sapiens]	0	21.066	19	4	40	4	216	23.7	9.41	47.89	4	0	0	2.568	0.0745367	105.11	66	134	69.5	118.19	Not Found	High	High	High	Peak Found	High	High	High	High	High	1
FALSE	High	Master Protein	P15880	40S ribosomal protein S2 [OS=Homo sapiens]	0	21	11	2	196	2	293	31.3	10.24	545.19	2	0	0	0.81	0.857817	65.38	124.5	75.5	50.41	52.18	High	High	High	High	High	High	High	High	High	High	1
FALSE	High	Master Protein	P49915	GMP synthase [glutamine-hydrolyzing] [OS=Homo sapiens]	0	21	11	5	27	5	693	76.7	6.87	51.21	5	0	0	0.571	0.587507	101.04	122.9	77.1	39.22	51.47	Not Found	High	High	High	High	High	High	High	High	High	1
FALSE	High	Master Protein	Q9Y305	Acyl-coenzyme A thioesterase 9, mitochondrial [OS=Homo sapiens]	0	20.852	12	4	8	4	439	49.9	8.6	17.96	4	0	0	0.404	0.583345	131.96	149.4	50.6	83.53	79.92	Peak Found	High	Peak Found	High	Peak Found	Peak Found	High	High	Peak Found	High	1
FALSE	High	Master Protein	Q5JPE7	Nodal modulator 2 [OS=Homo sapiens]	0	20.839	5	5	31	5	1267	139.4	5.76	49.29	5	0	0	1.659	0.471952	109.01	103.7	96.3	84.75	56.64	Not Found	High	High	High	High	Peak Found	High	Peak Found	High	High	1
FALSE	High	Master Protein	O75368	SH3 domain-binding glutamic acid-rich-like protein [OS=Homo sapiens]	0	20.826	59	6	26	6	114	12.8	5.25	57.99	6	0	0	1.412	0.303834	92.22	74.5	125.5	46.41	59.57	High	Peak Found	High	High	High	High	High	High	High	High	1
TRUE	High	Master Protein	P09429	High mobility group protein B1 [OS=Homo sapiens]	0	20.789	19	3	32	2	215	24.9	5.74	96.83	3	0	0	2.268	0.00830781	95.25	80.4	119.6	63.41	69.09	High	High	Peak Found	High	High	High	High	High	High	High	1
FALSE	High	Master Protein	P61077	Ubiquitin-conjugating enzyme E2 D3 [OS=Homo sapiens]	0	20.772	29	2	104	2	147	16.7	7.8	378.18	2	0	0	1.216	0.605772	62.39	84.8	115.2	29.09	47.75	High	High	High	High	High	High	High	High	High	High	1
FALSE	High	Master Protein	Q9UIA9	Exportin-7 [OS=Homo sapiens]	0	20.74	7	4	10	4	1087	123.8	6.32	28.44	4	0	0	1.847	0.323833	67.02	57.4	142.6	27.32	57.43	Not Found	Peak Found	High	Peak Found	High	Not Found	High	High	High	High	1
FALSE	High	Master Protein	Q9NPJ3	Acyl-coenzyme A thioesterase 13 [OS=Homo sapiens]	0	20.628	22	2	42	2	140	15	9.14	81.07	2	0	0	1.026	0.8789	117.13	99.6	100.4	76.81	64.11	High	High	High	Not Found	High	High	High	High	High	High	1
FALSE	High	Master Protein	Q03426	Mevalonate kinase [OS=Homo sapiens]	0	20.599	23	5	51	5	396	42.4	6.46	114.92	5	0	0	0.958	0.918606	97.25	100.4	99.6	33.94	81.78	Not Found	High	High	High	High	High	High	High	High	High	1
FALSE	High	Master Protein	Q15772	Striated muscle preferentially expressed protein kinase [OS=Homo sapiens]	0	20.597	3	6	10	6	3267	354.1	8.51	22.45	6	0	0	1.202	0.7982	82.35	84.4	115.6	88.74	92.24	Not Found	Peak Found	High	High	High	Peak Found	High	High	Not Found	Not Found	1
FALSE	High	Master Protein	Q9UJU6	Drebrin-like protein [OS=Homo sapiens]	0	20.59	13	3	16	3	430	48.2	5.05	40.28	3	0	0	0.442	0.450892	135.64	138.9	61.1	120.64	117.55	High	Peak Found	Peak Found	High	High	Peak Found	High	Peak Found	High	High	1
FALSE	High	Master Protein	P51970	NADH dehydrogenase [ubiquinone] 1 alpha subcomplex subunit 8 [OS=Homo sapiens]	0	20.566	25	4	20	4	172	20.1	7.65	49.77	4	0	0	0.999	0.918299	101.38	106.5	93.5	69.98	73.11	Not Found	High	High	High	High	High	High	High	High	High	1
FALSE	High	Master Protein	P14174	Macrophage migration inhibitory factor [OS=Homo sapiens]	0	20.544	30	3	179	3	115	12.5	7.88	480.46	3	0	0	0.734	0.694421	109.84	84.4	115.6	113.81	61.8	High	High	High	High	High	High	High	High	High	High	1
FALSE	High	Master Protein	P13807	Glycogen [starch] synthase, muscle [OS=Homo sapiens]	0	20.516	11	4	14	4	737	83.7	6.18	38.95	4	0	0	1.041	0.867778	120.78	45.3	154.7	168.5	48.37	Not Found	High	Peak Found	High	High	Not Found	High	High	High	High	1
FALSE	High	Master Protein	P53597	Succinate--CoA ligase [ADP/GDP-forming] subunit alpha, mitochondrial [OS=Homo sapiens]	0	20.514	7	1	52	1	346	36.2	8.79	190.28	1	0	0	1.419	0.420904	77.84	111.7	88.3	47.75	69.1	High	High	High	High	High	High	High	High	High	High	1
FALSE	High	Master Protein	P26232	Catenin alpha-2 [OS=Homo sapiens]	0	20.511	6	4	28	1	953	105.2	5.71	58.74	4	0	0	1.212	0.692634	77.35	122.8	77.2	56.01	74.24	Not Found	High	Peak Found	High	Not Found	High	High	High	High	Not Found	1
TRUE	High	Master Protein	Q9Y6E2	eIF5-mimic protein 1 [OS=Homo sapiens]	0	20.509	13	5	11	5	419	48.1	6.68	18.45	5	0	0	3.435	0.1103	147.15	123.1	76.9	140.54	117.08	High	Not Found	Not Found	Not Found	Peak Found	High	Not Found	High	Not Found	High	1
FALSE	High	Master Protein	Q9P0K7	Ankycorbin [OS=Homo sapiens]	0	20.497	10	5	49	5	980	110	6.21	140.15	5	0	0	0.603	0.792188	75.42	127.5	72.5	48.5	35.85	High	High	High	High	High	High	High	High	High	High	1
FALSE	High	Master Protein	Q13616	Cullin-1 [OS=Homo sapiens]	0	20.49	9	5	18	5	776	89.6	8	23.78	5	0	0	0.536	0.689815	125.58	112.1	87.9	111.77	122.9	Peak Found	High	High	High	High	Peak Found	High	High	Peak Found	High	1
FALSE	High	Master Protein	O94905	Erlin-2 [OS=Homo sapiens]	0	20.461	11	3	13	3	339	37.8	5.62	38.98	3	0	0	1.127	0.826266	91.57	109.4	90.6	74.99	79.13	Not Found	High	High	High	High	Peak Found	High	High	Peak Found	High	1
TRUE	High	Master Protein	Q13131	5'-AMP-activated protein kinase catalytic subunit alpha-1 [OS=Homo sapiens]	0	20.426	14	5	17	3	559	64	8.12	46.2	5	0	0	0.177	0.0448814	121.34	161.7	38.3	86.77	57.38	Not Found	High	Not Found	High	Peak Found	Not Found	High	High	Peak Found	High	1
FALSE	High	Master Protein	Q9NUU7	ATP-dependent RNA helicase DDX19A [OS=Homo sapiens]	0	20.401	21	5	21	5	478	53.9	6.58	54.41	5	0	0	0.8	0.918606	91.89	165.8	34.2	67.48	80.54	Not Found	High	High	High	High	Not Found	High	High	High	Peak Found	1
FALSE	High	Master Protein	Q9UHY7	Enolase-phosphatase E1 [OS=Homo sapiens]	0	20.393	27	4	31	4	261	28.9	4.78	74.66	4	0	0	0.495	0.650502	88.52	139.4	60.6	68.27	50.2	Not Found	High	High	High	High	High	High	Peak Found	High	High	1
FALSE	High	Master Protein	P62834	Ras-related protein Rap-1A [OS=Homo sapiens]	0	20.379	30	4	19	2	184	21	6.67	49.32	4	0	2	1.171	0.734805	73.26	86.5	113.5	41.64	20.92	Not Found	Not Found	Not Found	Not Found	Not Found	Not Found	Not Found	High	Not Found	Not Found	1
TRUE	High	Master Protein	O95140	Mitofusin-2 [OS=Homo sapiens]	0	20.368	11	5	11	5	757	86.3	6.98	30.84	5	0	0	22.625	3.37874e-07	7.96	7.6	192.4	133.56	120.48	Not Found	High	High	High	Not Found	High	High	High	High	Not Found	1
TRUE	High	Master Protein	P21953	2-oxoisovalerate dehydrogenase subunit beta, mitochondrial [OS=Homo sapiens]	0	20.347	13	3	11	3	392	43.1	6.29	35.49	3	0	0	2.944	0.000435985	88.84	65.1	134.9	42.26	18.51	High	High	High	High	Peak Found	High	Peak Found	High	High	High	1
TRUE	High	Master Protein	Q9UHX1	Poly(U)-binding-splicing factor PUF60 [OS=Homo sapiens]	0	20.327	11	4	17	4	559	59.8	5.29	43.31	4	0	0	0.257	0.0832378	101.42	128.1	71.9	79.31	40.17	Not Found	Not Found	Peak Found	High	High	Not Found	High	High	High	High	1
FALSE	High	Master Protein	P35244	Replication protein A 14 kDa subunit [OS=Homo sapiens]	0	20.314	43	3	17	3	121	13.6	5.08	58.68	3	0	0	1.139	0.793264	96.76	63.5	136.5	76.2	96.02	Not Found	High	High	High	High	High	High	High	High	High	1
FALSE	High	Master Protein	Q92922	SWI/SNF complex subunit SMARCC1 [OS=Homo sapiens]	0	20.309	6	4	26	2	1105	122.8	5.76	64.32	4	0	0	0.735	0.945094	85.72	126.6	73.4	68.77	36.6	Not Found	High	High	High	Peak Found	High	High	High	High	High	1
TRUE	High	Master Protein	P20073	Annexin A7 [OS=Homo sapiens]	0	20.273	14	5	34	5	488	52.7	5.68	69.56	5	0	0	3.169	0.00842802	107.97	64.3	135.7	49.93	21.89	Peak Found	High	High	High	High	High	High	High	High	High	1
FALSE	High	Master Protein	Q63HM9	PI-PLC X domain-containing protein 3 [OS=Homo sapiens]	0	20.248	24	4	11	4	321	36.3	6.29	34.63	4	0	0	0.384	0.22502	140.47	67.1	132.9	85.62	58.16	Peak Found	Peak Found	High	High	High	Not Found	High	High	High	High	1
FALSE	High	Master Protein	Q04837	Single-stranded DNA-binding protein, mitochondrial [OS=Homo sapiens]	0	20.198	23	3	25	3	148	17.2	9.6	75.22	3	0	0	1.08	0.825043	91.27	103.4	96.6	43.94	51.77	High	High	High	High	High	High	High	High	High	High	1
FALSE	High	Master Protein	Q9NYL2	Mitogen-activated protein kinase kinase kinase 20 [OS=Homo sapiens]	0	20.166	8	4	39	4	800	91.1	7.87	78.27	4	0	0	0.891	0.97082	77.27	104.4	95.6	34.14	31.39	Peak Found	High	High	High	High	High	High	High	High	High	1
FALSE	High	Master Protein	P49257	Protein ERGIC-53 [OS=Homo sapiens]	0	20.071	21	5	41	5	510	57.5	6.77	106.27	5	0	0	0.708	0.818934	105.04	117.8	82.2	41.9	42.89	Peak Found	High	High	High	High	Not Found	High	High	High	High	1
FALSE	High	Master Protein	P60953	Cell division control protein 42 homolog [OS=Homo sapiens]	0	20.049	26	4	52	4	191	21.2	6.55	149.74	4	0	0	1.24	0.561186	58.07	81.7	118.3	63.53	45.56	High	High	High	High	High	High	High	High	High	High	1
FALSE	High	Master Protein	O14980	Exportin-1 [OS=Homo sapiens]	0	20.015	5	3	32	3	1071	123.3	6.06	75.36	3	0	0	0.579	0.378082	127.04	57.4	142.6	102.67	54.41	Peak Found	High	High	High	High	High	High	High	High	High	1
FALSE	High	Master Protein	Q9UFN0	Protein NipSnap homolog 3A [OS=Homo sapiens]	0	19.987	23	4	46	4	247	28.4	9.16	100.3	4	0	0	0.527	0.153335	108.86	97.4	102.6	31.75	54.57	High	High	High	High	High	High	High	High	High	High	1
FALSE	High	Master Protein	O14773	Tripeptidyl-peptidase 1 [OS=Homo sapiens]	0	19.947	13	3	15	3	563	61.2	6.48	62.1	3	0	0	0.862	0.970218	80.46	99.4	100.6	38.04	59.31	High	High	High	High	High	High	High	High	High	High	1
FALSE	High	Master Protein	Q02790	Peptidyl-prolyl cis-trans isomerase FKBP4 [OS=Homo sapiens]	0	19.945	16	4	49	4	459	51.8	5.43	137.85	4	0	0	0.795	0.88118	84.91	80.7	119.3	40.53	66.6	Peak Found	High	High	High	High	High	High	High	High	High	1
FALSE	High	Master Protein	P55263	Adenosine kinase [OS=Homo sapiens]	0	19.941	22	4	15	4	362	40.5	6.7	27.51	4	0	0	1.066	0.912253	105.08	66.8	133.2	98.23	109.3	Not Found	High	High	Not Found	High	Not Found	High	High	Peak Found	High	1
TRUE	High	Master Protein	Q9Y5X3	Sorting nexin-5 [OS=Homo sapiens]	0	19.89	13	4	20	4	404	46.8	6.76	59.41	4	0	0	0.233	0.00403195	126.78	162.5	37.5	64.38	141.7	High	High	High	Peak Found	High	Not Found	High	High	High	High	1
FALSE	High	Master Protein	Q99439	Calponin-2 [OS=Homo sapiens]	0	19.835	20	3	18	3	309	33.7	7.33	58.17	3	0	0	1.524	0.494506	92.28	94	106	75.03	73.39	High	High	High	High	Peak Found	High	High	High	High	High	1
FALSE	High	Master Protein	O75521	Enoyl-CoA delta isomerase 2 [OS=Homo sapiens]	0	19.822	17	4	22	4	394	43.6	9	47.11	4	0	0	0.703	0.790123	100.81	122.5	77.5	35.1	67.82	Peak Found	High	High	Peak Found	High	Peak Found	High	High	High	High	1
FALSE	High	Master Protein	Q9NR28	Diablo IAP-binding mitochondrial protein [OS=Homo sapiens]	0	19.792	28	3	10	3	239	27.1	5.9	30.8	3	0	0	0.48	0.256876	73.13	129.7	70.3	55.27	55.49	High	High	High	Peak Found	High	Peak Found	High	High	High	High	1
FALSE	High	Master Protein	Q9HBU9	Popeye domain-containing protein 2 [OS=Homo sapiens]	0	19.76	14	4	31	4	364	40.4	5.36	76.3	4	0	0	1.553	0.20359	143.87	49.6	150.4	104.96	66.66	Peak Found	High	High	Peak Found	High	High	High	High	High	High	1
FALSE	High	Master Protein	P62424	60S ribosomal protein L7a [OS=Homo sapiens]	0	19.731	14	2	37	2	266	30	10.61	98.55	2	0	0	0.832	0.997485	127.77	93.1	106.9	107.83	91.97	High	High	High	High	High	Not Found	High	High	High	Peak Found	1
FALSE	High	Master Protein	P31153	S-adenosylmethionine synthase isoform type-2 [OS=Homo sapiens]	0	19.692	15	3	56	3	395	43.6	6.48	140.34	3	0	0	0.948	0.937916	92.26	96.8	103.2	41.29	153.41	Not Found	High	High	High	High	High	High	High	High	High	1
TRUE	High	Master Protein	Q8IYD1	Eukaryotic peptide chain release factor GTP-binding subunit ERF3B [OS=Homo sapiens]	0	19.681	11	5	39	1	628	68.8	5.43	80.62	5	0	0	100	5.5167e-17			200		109.33	Not Found	Not Found	Not Found	Not Found	Not Found	Not Found	Not Found	Peak Found	Not Found	High	1
FALSE	High	Master Protein	P05387	60S acidic ribosomal protein P2 [OS=Homo sapiens]	0	19.631	70	4	54	4	115	11.7	4.54	135.78	4	0	0	1.335	0.395761	124.3	122.3	77.7	59.39	110.51	High	High	High	High	High	Not Found	High	High	High	High	1
FALSE	High	Master Protein	Q9Y333	U6 snRNA-associated Sm-like protein LSm2 [OS=Homo sapiens]	0	19.628	48	3	24	3	95	10.8	6.52	51.91	3	0	0	1.223	0.600998	75.45	130.7	69.3	82.75	93.65	Not Found	High	High	High	High	High	High	High	High	High	1
FALSE	High	Master Protein	P42224	Signal transducer and activator of transcription 1-alpha/beta [OS=Homo sapiens]	0	19.624	10	5	16	5	750	87.3	6.05	44.22	5	0	0	0.446	0.407545	65.2	150.8	49.2	45.29	73.45	Peak Found	High	High	Peak Found	High	Peak Found	High	High	High	High	1
FALSE	High	Master Protein	P14735	Insulin-degrading enzyme [OS=Homo sapiens]	0	19.608	6	3	22	3	1019	117.9	6.61	58.39	3	0	0	0.423	0.278529	64.1	125.5	74.5	57.13	71.52	Not Found	High	High	Peak Found	High	High	High	High	High	High	1
TRUE	High	Master Protein	P07910	Heterogeneous nuclear ribonucleoproteins C1/C2 [OS=Homo sapiens]	0	19.607	9	2	15	2	306	33.7	5.08	28.45	2	0	0	2.929	0.0140876	80.48	43.7	156.3	45.41	63.53	Not Found	High	Peak Found	Peak Found	High	Not Found	High	High	High	Peak Found	1
FALSE	High	Master Protein	O75600	2-amino-3-ketobutyrate coenzyme A ligase, mitochondrial [OS=Homo sapiens]	0	19.591	13	3	32	3	419	45.3	8.05	71.32	3	0	0	0.422	0.334177	105.46	140.8	59.2	31.26	96.58	High	High	High	High	High	Peak Found	High	High	High	High	1
FALSE	High	Master Protein	O75223	Gamma-glutamylcyclotransferase [OS=Homo sapiens]	0	19.569	24	3	56	3	188	21	5.14	119.72	3	0	0	0.598	0.282449	76.89	106	94	51.88	56.59	Not Found	High	High	High	High	High	High	High	High	High	1
FALSE	High	Master Protein	O43583	Density-regulated protein [OS=Homo sapiens]	0	19.513	17	2	53	2	198	22.1	5.3	138.24	2	0	0	0.814	0.892772	86.06	95	105	36.88	48.26	High	High	Peak Found	High	High	High	High	High	High	High	1
FALSE	High	Master Protein	Q6VY07	Phosphofurin acidic cluster sorting protein 1 [OS=Homo sapiens]	0	19.505	8	4	11	4	963	104.8	7.74	31.53	4	0	0	0.365	0.285047	111.09	141.1	58.9	129.69	65.41	Not Found	Peak Found	High	Peak Found	High	Peak Found	High	High	High	High	1
FALSE	High	Master Protein	P19237	Troponin I, slow skeletal muscle [OS=Homo sapiens]	0	19.494	17	3	192	3	187	21.7	9.58	515.37	3	0	0	1.559	0.1602	126.65	111.3	88.7	91.34	140	High	High	High	High	High	High	High	High	High	High	1
FALSE	High	Master Protein	P33991	DNA replication licensing factor MCM4 [OS=Homo sapiens]	0	19.494	8	4	24	4	863	96.5	6.74	58.7	4	0	0	1.231	0.716047	122.17	40.2	159.8	123.66	71.91	Not Found	Peak Found	High	High	High	Not Found	High	High	Peak Found	High	1
FALSE	High	Master Protein	P63167	Dynein light chain 1, cytoplasmic [OS=Homo sapiens]	0	19.472	38	2	68	1	89	10.4	7.4	162.03	2	0	1	0.922	0.946799	116.02	97	103	128.44	105.3	High	High	High	High	High	High	High	High	High	High	1
FALSE	High	Master Protein	P55010	Eukaryotic translation initiation factor 5 [OS=Homo sapiens]	0	19.457	16	5	14	5	431	49.2	5.58	34.56	5	0	0	0.77	0.945294	95.9	103.6	96.4	12.72	65.62	Not Found	Peak Found	High	High	High	High	High	High	High	Peak Found	1
FALSE	High	Master Protein	P25789	Proteasome subunit alpha type-4 [OS=Homo sapiens]	0	19.445	25	4	50	4	261	29.5	7.72	115.08	4	0	0	1.098	0.826261	81.57	141.5	58.5	16.57	76.9	High	High	High	High	High	Not Found	High	High	High	High	1
FALSE	High	Master Protein	Q96PU8	Protein quaking [OS=Homo sapiens]	0	19.438	17	4	18	4	341	37.6	8.56	44.4	4	0	0	0.97	0.931936	86.56	86.9	113.1	48.65	23.78	Peak Found	High	High	High	High	High	High	High	High	High	1
FALSE	High	Master Protein	O95861	3'(2'),5'-bisphosphate nucleotidase 1 [OS=Homo sapiens]	0	19.428	24	5	14	5	308	33.4	5.69	26.61	5	0	0	2.797	0.15854	131.98	55.2	144.8	102	105.62	High	High	High	High	Not Found	Not Found	Not Found	High	Not Found	High	1
FALSE	High	Master Protein	P61326	Protein mago nashi homolog [OS=Homo sapiens]	0	19.42	25	3	23	3	146	17.2	6.11	49.36	3	0	0	0.965	0.92484	73.43	107.8	92.2	58.79	39.83	Peak Found	High	High	High	High	High	Peak Found	High	High	High	1
FALSE	High	Master Protein	Q12797	Aspartyl/asparaginyl beta-hydroxylase [OS=Homo sapiens]	0	19.375	13	4	28	4	758	85.8	5.01	54.56	4	0	0	0.893	0.989228	66.14	110.1	89.9	59.16	34.09	High	High	High	High	High	Peak Found	High	High	High	High	1
FALSE	High	Master Protein	Q8NCN5	Pyruvate dehydrogenase phosphatase regulatory subunit, mitochondrial [OS=Homo sapiens]	0	19.307	7	3	17	3	879	99.3	6.35	42.09	3	0	0	0.632	0.726517	86.52	126.2	73.8	36.95	99.68	Not Found	High	High	Peak Found	High	Peak Found	High	High	Peak Found	High	1
FALSE	High	Master Protein	Q02543	60S ribosomal protein L18a [OS=Homo sapiens]	0	19.279	17	3	62	3	176	20.7	10.71	81.47	3	0	0	1.573	0.196581	137.96	109.9	90.1	115.08	93.01	Peak Found	High	High	High	High	High	High	High	High	High	1
FALSE	High	Master Protein	P36542	ATP synthase subunit gamma, mitochondrial [OS=Homo sapiens]	0	19.249	21	4	10	4	298	33	9.22	21.13	4	0	0	1.045	0.925504	131.07	40.1	159.9	122.88	158.8	Not Found	Not Found	Peak Found	Peak Found	High	Not Found	High	High	Peak Found	Peak Found	1
FALSE	High	Master Protein	P14854	Cytochrome c oxidase subunit 6B1 [OS=Homo sapiens]	0	19.247	44	3	75	3	86	10.2	7.05	147.01	3	0	0	0.716	0.647405	79.37	106.8	93.2	21.02	56.6	High	High	High	High	High	High	High	High	High	High	1
FALSE	High	Master Protein	Q9HB07	MYG1 exonuclease [OS=Homo sapiens]	0	19.224	13	3	23	3	376	42.5	6.77	58.43	3	0	0	1.625	0.333648	83.14	64.4	135.6	69.29	61.68	Not Found	High	High	High	Peak Found	High	High	High	High	High	1
FALSE	High	Master Protein	P16278	Beta-galactosidase [OS=Homo sapiens]	0	19.207	10	4	10	4	677	76	6.57	27.19	4	0	0	0.472	0.262206	74.14	128.8	71.2	57.53	33.72	Not Found	High	High	Peak Found	High	Not Found	High	High	High	High	1
FALSE	High	Master Protein	Q9BSH4	Translational activator of cytochrome c oxidase 1 [OS=Homo sapiens]	0	19.195	29	4	15	4	297	32.5	8.13	35.46	4	0	0	0.891	0.996337	83.25	45.7	154.3	117.03	82.03	Not Found	High	Peak Found	High	High	Not Found	High	High	High	High	1
FALSE	High	Master Protein	Q93008	Probable ubiquitin carboxyl-terminal hydrolase FAF-X [OS=Homo sapiens]	0	19.138	5	6	18	6	2554	290.3	5.8	45.09	6	0	0	0.426	0.671358	63.35	105.1	94.9	36.98	97.95	Not Found	Not Found	High	High	High	Not Found	Peak Found	High	Peak Found	High	1
FALSE	High	Master Protein	Q96A65	Exocyst complex component 4 [OS=Homo sapiens]	0	19.103	7	4	18	4	974	110.4	6.49	39.34	4	0	0	0.53	0.726517	123.95	160.4	39.6	52.44	120.66	Peak Found	High	High	Peak Found	High	Peak Found	High	Peak Found	High	High	1
FALSE	High	Master Protein	O60884	DnaJ homolog subfamily A member 2 [OS=Homo sapiens]	0	19.077	22	4	24	4	412	45.7	6.48	65.84	4	0	0	1.5	0.380538	89.23	75.3	124.7	110.37	59.54	Not Found	High	High	Peak Found	High	High	High	High	High	High	1
FALSE	High	Master Protein	Q9P0L0	Vesicle-associated membrane protein-associated protein A [OS=Homo sapiens]	0	19.001	27	3	30	3	249	27.9	8.62	78.85	3	0	0	0.729	0.705358	92.34	110.8	89.2	46.82	68.34	High	High	High	High	High	High	High	High	High	High	1
FALSE	High	Master Protein	P36543	V-type proton ATPase subunit E 1 [OS=Homo sapiens]	0	18.999	22	3	11	3	226	26.1	8	38.32	3	0	0	0.697	0.955513	93.98	140.3	59.7	89.48	94.6	Peak Found	High	High	High	High	Not Found	High	High	High	High	1
TRUE	High	Master Protein	Q9BUL8	Programmed cell death protein 10 [OS=Homo sapiens]	0	18.994	22	3	20	3	212	24.7	8.19	56.61	3	0	0	7.971	1.21445e-05	119.75	26.5	173.5	112.84	103.23	Peak Found	Not Found	High	High	High	Not Found	Peak Found	High	High	High	1
FALSE	High	Master Protein	Q9ULV4	Coronin-1C [OS=Homo sapiens]	0	18.969	14	3	26	3	474	53.2	7.08	65.41	3	0	0	0.83	0.966267	94.15	127.5	72.5	59.54	75.47	Not Found	High	High	High	High	High	High	High	High	High	1
FALSE	High	Master Protein	P98155	Very low-density lipoprotein receptor [OS=Homo sapiens]	0	18.957	6	3	22	3	873	96	4.79	57.34	3	0	0	0.838	0.992943	106.84	114.4	85.6	42.6	157.15	High	High	High	High	High	High	High	High	High	High	1
FALSE	High	Master Protein	Q8NBN7	Retinol dehydrogenase 13 [OS=Homo sapiens]	0	18.923	27	4	16	4	331	35.9	8.1	50.73	4	0	0	0.77	0.979785	125.18	12.2	187.8	159.15	68.87	Not Found	High	Peak Found	High	High	High	High	High	High	High	1
TRUE	High	Master Protein	Q15075	Early endosome antigen 1 [OS=Homo sapiens]	0	18.922	5	4	5	4	1411	162.4	5.68	15.82	4	0	0	13.52	0.0811579	15.91	104	96	41.22	170.68	Not Found	Not Found	Not Found	Peak Found	Peak Found	Not Found	Peak Found	High	Peak Found	Not Found	1
FALSE	High	Master Protein	Q99719	Septin-5 [OS=Homo sapiens]	0	18.909	15	3	33	3	369	42.8	6.67	102.44	3	0	0	0.95	0.937916	65.99	139.5	60.5	70.32	92.37	Peak Found	High	High	High	High	High	High	High	High	High	1
TRUE	High	Master Protein	Q15907	Ras-related protein Rab-11B [OS=Homo sapiens]	0	18.907	22	3	21	3	218	24.5	5.94	43.73	3	0	0	0.301	0.0406109	114.7	138.8	61.2	5.78	56.56	Not Found	High	High	High	High	Peak Found	High	High	High	High	1
FALSE	High	Master Protein	Q9UBR2	Cathepsin Z [OS=Homo sapiens]	0	18.831	14	2	22	2	303	33.8	7.11	29.61	2	0	0	1.052	0.887972	105.46	52	148	76.72	37.21	High	High	High	High	Peak Found	Not Found	High	High	High	Not Found	1
FALSE	High	Master Protein	O95747	Serine/threonine-protein kinase OSR1 [OS=Homo sapiens]	0	18.808	13	5	18	4	527	58	6.43	43.74	5	0	0	1.068	0.88118	75.42	82.7	117.3	50.62	38.42	Not Found	High	High	High	High	High	High	High	High	High	1
FALSE	High	Master Protein	P54105	Methylosome subunit pICln [OS=Homo sapiens]	0	18.798	28	4	24	4	237	26.2	4.11	70.91	4	0	0	0.907	0.966267	98.31	91.2	108.8	10.23	26.19	High	High	High	High	High	High	High	High	High	Peak Found	1
FALSE	High	Master Protein	P49736	DNA replication licensing factor MCM2 [OS=Homo sapiens]	0	18.786	7	4	22	4	904	101.8	5.52	60.3	4	0	0	1.031	0.864904	115.31	101.4	98.6	32.1	60.54	Peak Found	High	High	High	High	Not Found	High	High	High	High	1
FALSE	High	Master Protein	O60502	Protein O-GlcNAcase [OS=Homo sapiens]	0	18.771	9	4	17	4	916	102.8	4.91	52.34	4	0	0	0.92	0.9473	73.71	118.4	81.6	60.38	105.86	Peak Found	High	High	Peak Found	High	High	High	High	High	High	1
FALSE	High	Master Protein	P54709	Sodium/potassium-transporting ATPase subunit beta-3 [OS=Homo sapiens]	0	18.769	20	4	20	4	279	31.5	8.35	62.24	4	0	0	0.987	0.91459	100.7	114.1	85.9	23.76	54.76	Not Found	Peak Found	High	High	High	High	High	High	High	High	1
TRUE	High	Master Protein	Q8TCJ2	Dolichyl-diphosphooligosaccharide--protein glycosyltransferase subunit STT3B [OS=Homo sapiens]	0	18.733	4	2	9	2	826	93.6	8.91	24.94	2	0	0	100	5.5167e-17			200		28.65	Not Found	Not Found	High	Not Found	Not Found	High	High	Peak Found	High	Peak Found	1
FALSE	High	Master Protein	Q9NP79	Vacuolar protein sorting-associated protein VTA1 homolog [OS=Homo sapiens]	0	18.732	22	3	20	3	307	33.9	6.29	68.42	3	0	0	0.6	0.577544	84.82	170.4	29.6	20.94	87.77	Peak Found	High	Peak Found	High	High	High	High	High	High	High	1
FALSE	High	Master Protein	Q01105	Protein SET [OS=Homo sapiens]	0	18.724	20	3	48	3	290	33.5	4.32	149.72	3	0	0	0.77	0.781067	94.41	92.1	107.9	54.33	51.65	High	High	High	High	High	High	High	High	High	High	1
FALSE	High	Master Protein	Q9NVT9	Armadillo repeat-containing protein 1 [OS=Homo sapiens]	0	18.697	30	3	8	3	282	31.3	5.74	24.63	3	0	0	0.306	0.260061	104.1	139.9	60.1	81.22	99.84	High	High	Peak Found	High	High	Not Found	High	High	Peak Found	Not Found	1
TRUE	High	Master Protein	Q9BSD7	Cancer-related nucleoside-triphosphatase [OS=Homo sapiens]	0	18.682	28	4	5	4	190	20.7	9.54	10.33	4	0	0	8.3	0.0058016	465.89	156.7	43.3	57.99	139.52	Not Found	Peak Found	Peak Found	Peak Found	High	Not Found	Peak Found	High	Not Found	Not Found	1
FALSE	High	Master Protein	O00148	ATP-dependent RNA helicase DDX39A [OS=Homo sapiens]	0	18.676	13	5	18	1	427	49.1	5.68	34.83	5	0	0								Not Found	Not Found	Not Found	Not Found	Not Found	High	Not Found	Not Found	Not Found	Not Found	1
FALSE	High	Master Protein	P07585	Decorin [OS=Homo sapiens]	0	18.651	14	3	10	3	359	39.7	8.54	27.46	3	0	0	0.528	0.637948	106.52	92.4	107.6	77.28	36.66	Peak Found	Not Found	High	High	High	Peak Found	Peak Found	High	High	Not Found	1
FALSE	High	Master Protein	P48444	Coatomer subunit delta [OS=Homo sapiens]	0	18.642	13	4	19	4	511	57.2	6.21	47.46	4	0	0	1.435	0.453128	83.27	93.8	106.2	53.51	86.59	Peak Found	High	High	High	High	Peak Found	High	High	High	High	1
FALSE	High	Master Protein	Q13724	Mannosyl-oligosaccharide glucosidase [OS=Homo sapiens]	0	18.625	6	3	28	3	837	91.9	8.9	76.64	3	0	0	0.645	0.806284	61.9	117.4	82.6	41.1	25.2	Not Found	High	High	High	High	Peak Found	High	High	High	High	1
FALSE	High	Master Protein	Q8N3L3	Beta-taxilin [OS=Homo sapiens]	0	18.62	7	3	53	3	684	76.5	4.93	137.55	3	0	0	0.715	0.645061	130.54	169.3	30.7	23.92	88.61	High	High	High	High	High	High	High	High	High	High	1
FALSE	High	Master Protein	P15586	N-acetylglucosamine-6-sulfatase [OS=Homo sapiens]	0	18.612	12	5	11	5	552	62	8.31	33.63	5	0	0	0.852	0.982667	45.87	109.1	90.9	18.13	34.99	Not Found	High	Peak Found	High	High	High	Peak Found	High	Peak Found	High	1
FALSE	High	Master Protein	Q6P2E9	Enhancer of mRNA-decapping protein 4 [OS=Homo sapiens]	0	18.604	5	4	20	4	1401	151.6	5.86	16.55	4	0	0	1.006	0.916323	90.5	130.9	69.1	41.98	98.66	Not Found	High	High	Peak Found	Peak Found	High	High	High	Peak Found	High	1
FALSE	High	Master Protein	Q709C8	Intermembrane lipid transfer protein VPS13C [OS=Homo sapiens]	0	18.603	2	4	12	4	3753	422.1	6.83	22.52	4	0	0	1.142	0.830006	78.38	39.4	160.6	64.2	65.67	Not Found	Not Found	High	Peak Found	High	High	Peak Found	High	High	High	1
FALSE	High	Master Protein	P20618	Proteasome subunit beta type-1 [OS=Homo sapiens]	0	18.583	22	3	76	3	241	26.5	8.13	222.15	3	0	0	0.514	0.111358	111.09	118	82	48.1	68.69	High	High	High	High	High	Peak Found	High	High	High	High	1
TRUE	High	Master Protein	P22102	Trifunctional purine biosynthetic protein adenosine-3 [OS=Homo sapiens]	0	18.555	10	5	13	5	1010	107.7	6.7	36.52	5	0	0	0.189	0.00894309	111.66	148.8	51.2	81.11	54.25	Not Found	High	High	High	Peak Found	Peak Found	Peak Found	High	Not Found	High	1
FALSE	High	Master Protein	P61221	ATP-binding cassette sub-family E member 1 [OS=Homo sapiens]	0	18.541	10	5	36	5	599	67.3	8.34	70.44	5	0	0	0.871	0.993077	133.8	106.5	93.5	40.49	81.14	Not Found	High	High	High	High	Peak Found	High	High	High	High	1
FALSE	High	Master Protein	Q8TAT6	Nuclear protein localization protein 4 homolog [OS=Homo sapiens]	0	18.507	13	5	19	5	608	68.1	6.38	35.35	5	0	0	1	0.905543	130.04	127.5	72.5	50.04	43.52	Peak Found	High	High	High	High	High	High	High	High	High	1
FALSE	High	Master Protein	Q9NY47	Voltage-dependent calcium channel subunit alpha-2/delta-2 [OS=Homo sapiens]	0	18.452	6	5	13	5	1150	129.7	5.8	20.82	5	0	0	0.682	0.956781	77.82	98	102	120.59	60.97	Peak Found	High	High	High	Peak Found	Not Found	High	High	High	Not Found	1
FALSE	High	Master Protein	Q8WVM8	Sec1 family domain-containing protein 1 [OS=Homo sapiens]	0	18.41	7	2	9	2	642	72.3	6.27	32.85	2	0	0	0.681	0.949057	44.59	125	75	21.79	41.18	Not Found	Peak Found	High	High	High	High	High	High	High	Peak Found	1
FALSE	High	Master Protein	O00505	Importin subunit alpha-4 [OS=Homo sapiens]	0	18.4	16	5	23	3	521	57.8	4.94	56.94	5	0	0	0.804	0.983638	65.29	99.3	100.7	52.22	39.89	High	High	High	Peak Found	High	Not Found	High	High	High	High	1
FALSE	High	Master Protein	O75190	DnaJ homolog subfamily B member 6 [OS=Homo sapiens]	0	18.397	17	3	19	3	326	36.1	9.16	56.54	3	0	0	1.924	0.243277	92.56	68.5	131.5	24.28	72.78	Not Found	High	High	High	High	High	High	High	High	High	1
FALSE	High	Master Protein	P05166	Propionyl-CoA carboxylase beta chain, mitochondrial [OS=Homo sapiens]	0	18.332	8	3	15	3	539	58.2	7.64	40.17	3	0	0	1.01	0.888854	76.57	96.9	103.1	33.83	61.62	Not Found	High	High	Peak Found	High	High	High	High	High	High	1
FALSE	High	Master Protein	P62244	40S ribosomal protein S15a [OS=Homo sapiens]	0	18.317	33	3	17	3	130	14.8	10.13	40	3	0	0	0.896	0.990548	99.82	116.6	83.4	76.35	38.2	Not Found	High	Peak Found	Peak Found	High	Not Found	High	High	Peak Found	High	1
FALSE	High	Master Protein	Q9Y224	RNA transcription, translation and transport factor protein [OS=Homo sapiens]	0	18.276	24	4	22	4	244	28.1	6.65	61.09	4	0	0	1.352	0.668558	76.65	91.6	108.4	52.38	34.21	Not Found	High	High	High	High	High	High	High	High	High	1
FALSE	High	Master Protein	P17812	CTP synthase 1 [OS=Homo sapiens]	0	18.271	12	4	9	4	591	66.6	6.46	19.11	4	0	0	1.869	0.419656	46.34	30.2	169.8	103.58	39.32	Not Found	High	Peak Found	Not Found	High	High	Peak Found	High	High	High	1
FALSE	High	Master Protein	P12955	Xaa-Pro dipeptidase [OS=Homo sapiens]	0	18.268	11	3	19	3	493	54.5	6	48.07	3	0	0	0.463	0.440686	63.18	124.4	75.6	33.47	19.56	Peak Found	High	High	High	High	Not Found	High	High	High	High	1
FALSE	High	Master Protein	Q9NQ88	Fructose-2,6-bisphosphatase TIGAR [OS=Homo sapiens]	0	18.242	17	3	10	3	270	30	7.69	27.39	3	0	0	0.77	0.964064	106.32	80.6	119.4	67.49	53.49	Not Found	High	Peak Found	High	Not Found	High	Peak Found	High	High	High	1
FALSE	High	Master Protein	Q86V81	THO complex subunit 4 [OS=Homo sapiens]	0	18.218	25	3	31	3	257	26.9	11.15	86.52	3	0	0	0.945	0.92484	94.97	99.3	100.7	100.01	93.48	Not Found	High	High	High	Peak Found	High	High	Not Found	High	High	1
FALSE	High	Master Protein	O00192	Splicing regulator ARVCF [OS=Homo sapiens]	0	18.203	7	4	18	4	962	104.6	6.81	44.54	4	0	0	0.789	0.97785	81.57	106.7	93.3	45.83	36.06	Not Found	High	High	High	High	High	High	High	High	High	1
FALSE	High	Master Protein	Q9H845	Complex I assembly factor ACAD9, mitochondrial [OS=Homo sapiens]	0	18.198	10	3	29	3	621	68.7	7.96	83.88	3	0	0	0.74	0.948699	79.48	120.8	79.2	109.19	91.31	Not Found	High	High	High	High	High	High	High	High	Not Found	1
FALSE	High	Master Protein	P00966	Argininosuccinate synthase [OS=Homo sapiens]	0	18.192	11	3	21	3	412	46.5	8.02	66.11	3	0	0	0.83	0.995831	91.22	98.3	101.7	75.47	56.95	High	High	High	Peak Found	High	Peak Found	High	High	High	High	1
FALSE	High	Master Protein	O75155	Cullin-associated NEDD8-dissociated protein 2 [OS=Homo sapiens]	0	18.174	5	4	10	4	1236	135.2	5.68	24.93	4	0	0	0.823	0.989952	55.49	120.6	79.4	46.37	43.01	Not Found	High	High	Not Found	High	High	Not Found	High	High	High	1
TRUE	High	Master Protein	P06730	Eukaryotic translation initiation factor 4E [OS=Homo sapiens]	0	18.14	19	3	18	3	217	25.1	6.15	56.49	3	0	0	0.387	0.0962349	115.3	142.7	57.3	43.04	95.71	Not Found	High	High	High	High	High	High	High	High	High	1
FALSE	High	Master Protein	P33992	DNA replication licensing factor MCM5 [OS=Homo sapiens]	0	18.094	13	6	25	6	734	82.2	8.37	35.33	6	0	0	1.19	0.792188	102.35	46.5	153.5	73.11	108.65	Not Found	High	High	Peak Found	High	High	High	High	High	High	1
FALSE	High	Master Protein	P54920	Alpha-soluble NSF attachment protein [OS=Homo sapiens]	0	18.082	25	4	13	4	295	33.2	5.36	29.39	4	0	0	0.469	0.249615	132.1	145.6	54.4	58.77	125.77	High	High	High	High	Peak Found	Peak Found	High	High	Peak Found	Not Found	1
FALSE	High	Master Protein	P54289	Voltage-dependent calcium channel subunit alpha-2/delta-1 [OS=Homo sapiens]	0	18.08	7	4	19	4	1103	124.5	5.27	48.54	4	0	0	1.321	0.65618	92.76	61.9	138.1	71.42	49.14	Not Found	High	High	Peak Found	High	Not Found	High	High	Peak Found	High	1
FALSE	High	Master Protein	P62841	40S ribosomal protein S15 [OS=Homo sapiens]	0	18.069	19	1	20	1	145	17	10.39	69.88	1	0	0	0.869	0.938988	85.73	107	93	74.4	37.81	Peak Found	High	High	High	High	High	High	High	High	High	1
TRUE	High	Master Protein	Q9HB71	Calcyclin-binding protein [OS=Homo sapiens]	0	18.058	26	4	41	4	228	26.2	8.25	108.52	4	0	0	2.655	0.000848257	104.08	82.8	117.2	61.01	74.13	High	High	High	Peak Found	High	High	High	High	High	High	1
FALSE	High	Master Protein	P05783	Keratin, type I cytoskeletal 18 [OS=Homo sapiens]	0	17.988	13	4	21	3	430	48	5.45	43.9	4	0	0	1.101	0.862069	95.42	87	113	96.53	68.03	High	High	High	Peak Found	Not Found	Peak Found	High	High	High	Not Found	1
FALSE	High	Master Protein	Q92890	Ubiquitin recognition factor in ER-associated degradation protein 1 [OS=Homo sapiens]	0	17.97	20	4	27	4	307	34.5	6.7	96.64	4	0	0	0.498	0.58989	81.67	136.8	63.2	44.21	59.43	High	High	High	High	High	High	High	High	High	High	1
FALSE	High	Master Protein	Q9BQ69	ADP-ribose glycohydrolase MACROD1 [OS=Homo sapiens]	0	17.968	14	3	46	3	325	35.5	9.51	99.25	3	0	0	0.801	0.925469	101.31	103	97	61.21	80.29	Peak Found	High	High	High	High	High	High	High	High	High	1
FALSE	High	Master Protein	Q9UQM7	Calcium/calmodulin-dependent protein kinase type II subunit alpha [OS=Homo sapiens]	0	17.967	17	4	16	2	478	54.1	7.08	35.9	4	0	0	0.922	0.946799	74.13	138.9	61.1	8.32	81.94	Not Found	Not Found	High	Not Found	Peak Found	Not Found	High	Peak Found	High	Not Found	1
FALSE	High	Master Protein	Q9Y4Z0	U6 snRNA-associated Sm-like protein LSm4 [OS=Homo sapiens]	0	17.952	24	3	16	3	139	15.3	9.99	49.17	3	0	0	1.011	0.912863	72.58	82.4	117.6	47.26	51.82	Not Found	High	High	High	High	High	High	High	High	High	1
FALSE	High	Master Protein	P10644	cAMP-dependent protein kinase type I-alpha regulatory subunit [OS=Homo sapiens]	0	17.925	17	5	20	5	381	43	5.35	37	5	0	0	0.745	0.762196	134.24	22.4	177.6	112.06	26.5	High	High	High	High	High	High	Peak Found	High	High	Peak Found	1
FALSE	High	Master Protein	P22307	Sterol carrier protein 2 [OS=Homo sapiens]	0	17.924	9	3	13	3	547	59	6.89	42.05	3	0	0	0.654	0.671358	100.12	113.4	86.6	48.73	73.57	Peak Found	High	High	Peak Found	High	High	High	High	High	High	1
FALSE	High	Master Protein	Q96K76	Ubiquitin carboxyl-terminal hydrolase 47 [OS=Homo sapiens]	0	17.915	5	4	8	4	1375	157.2	5.08	19.11	4	0	0	1.638	0.560429	85.46	45.3	154.7	140.77	34.5	Not Found	Peak Found	High	High	High	Not Found	Not Found	High	High	High	1
TRUE	High	Master Protein	Q04828	Aldo-keto reductase family 1 member C1 [OS=Homo sapiens]	0	17.901	21	3	9	3	323	36.8	7.88	25.38	3	0	0	0.374	0.0104845	137.08	166.9	33.1	28.04	49.8	Peak Found	High	High	High	High	Not Found	High	High	Peak Found	High	1
TRUE	High	Master Protein	Q7L7L0	Histone H2A type 3 [OS=Homo sapiens]	0	17.873	48	3	22	1	130	14.1	11.05	60.29	3	0	0	4.268	8.6066e-07	127.61	18.3	181.7	145.31	61	High	High	High	High	High	High	High	High	High	Peak Found	1
FALSE	High	Master Protein	Q92688	Acidic leucine-rich nuclear phosphoprotein 32 family member B [OS=Homo sapiens]	0	17.863	18	4	13	3	251	28.8	4.06	40.49	4	0	0	1.273	0.5671	111.02	75.2	124.8	70.87	94.68	Not Found	High	High	Peak Found	High	High	High	High	Peak Found	High	1
FALSE	High	Master Protein	Q9BXJ9	N-alpha-acetyltransferase 15, NatA auxiliary subunit [OS=Homo sapiens]	0	17.809	6	4	78	4	866	101.2	7.42	132.13	4	0	0	0.901	0.946684	96.64	133.1	66.9	43.71	86.12	Peak Found	High	High	High	High	High	High	High	High	High	1
FALSE	High	Master Protein	P09543	2',3'-cyclic-nucleotide 3'-phosphodiesterase [OS=Homo sapiens]	0	17.803	13	3	6	3	421	47.5	9.07	19.74	3	0	0	0.469	0.74681	146.27	102.7	97.3	86.97	81.19	High	Not Found	Peak Found	Peak Found	Peak Found	Not Found	High	High	High	High	1
FALSE	High	Master Protein	Q86U42	Polyadenylate-binding protein 2 [OS=Homo sapiens]	0	17.737	23	4	25	4	306	32.7	5.06	66.92	4	0	0	1.036	0.855092	87.93	130.3	69.7	24.28	63.27	High	High	Peak Found	High	High	High	High	High	High	High	1
FALSE	High	Master Protein	Q8N335	Glycerol-3-phosphate dehydrogenase 1-like protein [OS=Homo sapiens]	0	17.689	18	3	7	3	351	38.4	7.02	21.03	3	0	0	0.619	0.819265	36.9	128.9	71.1	117.79	115.19	Not Found	Peak Found	High	Peak Found	High	Not Found	Peak Found	High	High	High	1
FALSE	High	Master Protein	Q9NR45	Sialic acid synthase [OS=Homo sapiens]	0	17.652	19	3	18	3	359	40.3	6.74	47.24	3	0	0	0.753	0.910947	124.63	167.2	32.8	35.73	120.77	Peak Found	Peak Found	Peak Found	High	High	Peak Found	High	High	High	High	1
FALSE	High	Master Protein	Q9Y6M9	NADH dehydrogenase [ubiquinone] 1 beta subcomplex subunit 9 [OS=Homo sapiens]	0	17.643	28	4	15	4	179	21.8	8.38	16.74	4	0	0	0.791	0.98392	96.14	95.6	104.4	55.14	77.39	Not Found	High	Peak Found	High	Not Found	High	High	High	High	Not Found	1
FALSE	High	Master Protein	Q08945	FACT complex subunit SSRP1 [OS=Homo sapiens]	0	17.621	12	5	15	5	709	81	6.87	28.85	5	0	0	0.866	0.977232	132.55	127	73	66.34	48.23	Peak Found	High	High	Peak Found	High	High	High	High	High	High	1
FALSE	High	Master Protein	P06737	Glycogen phosphorylase, liver form [OS=Homo sapiens]	0	17.577	8	5	19	3	847	97.1	7.17	30.75	5	0	0	0.939	0.937916	79.59	60.3	139.7	24.67	47.9	Not Found	High	High	High	High	Peak Found	High	High	High	High	1
FALSE	High	Master Protein	Q9UKP3	Integrin beta-1-binding protein 2 [OS=Homo sapiens]	0	17.54	24	4	20	4	347	38.4	5.16	36.12	4	0	0	0.865	0.979785	127.8	34.3	165.7	145.16	60.59	Peak Found	High	High	Peak Found	High	Peak Found	High	High	High	High	1
FALSE	High	Master Protein	Q07020	60S ribosomal protein L18 [OS=Homo sapiens]	0	17.537	16	3	29	3	188	21.6	11.72	69.34	3	0	0	0.758	0.916323	110.7	113.2	86.8	55.4	79.42	Not Found	High	High	High	High	Not Found	High	High	High	High	1
FALSE	High	Master Protein	P35754	Glutaredoxin-1 [OS=Homo sapiens]	0	17.509	47	2	53	2	106	11.8	8.09	172.29	2	0	0	0.721	0.702352	96.24	113.7	86.3	45.26	60.48	High	High	High	High	High	High	Peak Found	High	High	High	1
FALSE	High	Master Protein	P35052	Glypican-1 [OS=Homo sapiens]	0	17.483	12	3	11	3	558	61.6	7.3	36.93	3	0	0	0.862	0.983638	44.05	80.5	119.5	12.11	46.87	Not Found	High	High	High	Not Found	High	High	High	High	High	1
FALSE	High	Master Protein	Q12959	Disks large homolog 1 [OS=Homo sapiens]	0	17.458	10	4	17	4	904	100.4	5.76	35.17	4	0	0	1.636	0.525704	97.55	157.2	42.8	94.34	114.63	High	High	High	High	High	High	High	High	High	Peak Found	1
TRUE	High	Master Protein	Q15119	[Pyruvate dehydrogenase (acetyl-transferring)] kinase isozyme 2, mitochondrial [OS=Homo sapiens]	0	17.451	13	3	10	3	407	46.1	6.61	25.98	3	0	0	0.18	0.123723	89.16	168.7	31.3	86.13	75.05	High	Peak Found	Not Found	High	Not Found	High	Peak Found	High	High	Not Found	1
FALSE	High	Master Protein	P46379	Large proline-rich protein BAG6 [OS=Homo sapiens]	0	17.449	5	3	5	3	1132	119.3	5.6	17.74	3	0	0	0.996	0.918299	95.39	75.1	124.9	50.24	69.93	Not Found	Peak Found	Peak Found	Peak Found	High	Peak Found	High	High	Peak Found	High	1
FALSE	High	Master Protein	P51648	Aldehyde dehydrogenase family 3 member A2 [OS=Homo sapiens]	0	17.429	8	2	14	2	485	54.8	7.88	53.32	2	0	0	0.88	0.988884	80.79	106.6	93.4	39.51	42.34	High	High	High	High	High	Not Found	High	High	High	High	1
FALSE	High	Master Protein	Q9Y639	Neuroplastin [OS=Homo sapiens]	0	17.387	10	3	21	3	398	44.4	7.99	30.7	3	0	0	0.632	0.857297	146.48	40.6	159.4	120.53	82.95	High	High	High	Peak Found	High	High	High	High	Peak Found	High	1
FALSE	High	Master Protein	Q99459	Cell division cycle 5-like protein [OS=Homo sapiens]	0	17.377	7	3	21	3	802	92.2	8.18	60.5	3	0	0	1.083	0.86664	138.6	69.9	130.1	150.34	87.78	Peak Found	High	High	High	High	High	High	High	High	High	1
FALSE	High	Master Protein	P30049	ATP synthase subunit delta, mitochondrial [OS=Homo sapiens]	0	17.339	36	2	131	2	168	17.5	5.49	326.69	2	0	0	0.643	0.426487	122.37	91.7	108.3	68.43	71.76	High	High	High	High	High	High	High	High	High	High	1
FALSE	High	Master Protein	P12081	Histidine--tRNA ligase, cytoplasmic [OS=Homo sapiens]	0	17.308	10	5	31	5	509	57.4	5.88	53.16	5	0	0	1.226	0.757939	87.34	111.4	88.6	45.72	93.17	Not Found	High	High	Peak Found	High	High	High	High	High	High	1
TRUE	High	Master Protein	P05976	Myosin light chain 1/3, skeletal muscle isoform [OS=Homo sapiens]	0	17.238	29	5	25	3	194	21.1	5.03	38.38	5	0	0	3.374	0.0195476	134.89	100.4	99.6	152.28	112.42	Peak Found	High	Peak Found	High	High	Not Found	High	High	High	High	1
TRUE	High	Master Protein	Q9H6N6	Putative uncharacterized protein MYH16 [OS=Homo sapiens]	0	17.213	3	2	297	1	1097	128.2	5.49	764.98	2	0	0	0.01	5.5167e-17		200		128.67		High	Not Found	Not Found	High	Peak Found	Not Found	Not Found	Not Found	Not Found	Not Found	1
TRUE	High	Master Protein	P11233	Ras-related protein Ral-A [OS=Homo sapiens]	0	17.208	16	3	10	3	206	23.6	7.11	22.84	3	0	0	4.662	0.00208747	26.47	8.1	191.9	150.07	6.08	Peak Found	High	Not Found	Peak Found	High	Not Found	High	High	Not Found	High	1
FALSE	High	Master Protein	P42166	Lamina-associated polypeptide 2, isoform alpha [OS=Homo sapiens]	0	17.206	8	3	53	3	694	75.4	7.66	170.16	3	0	0	1.007	0.894019	76.11	87.7	112.3	77.26	36.95	Peak Found	High	High	High	High	High	High	High	High	High	1
FALSE	High	Master Protein	Q9BUJ2	Heterogeneous nuclear ribonucleoprotein U-like protein 1 [OS=Homo sapiens]	0	17.205	7	4	12	4	856	95.7	6.92	24.56	4	0	0	1.155	0.726517	57.57	91.5	108.5	72.73	25.38	Not Found	High	Peak Found	Peak Found	Peak Found	High	High	High	Peak Found	High	1
FALSE	High	Master Protein	P23368	NAD-dependent malic enzyme, mitochondrial [OS=Homo sapiens]	0	17.198	13	4	15	4	584	65.4	7.61	35.95	4	0	0	0.874	0.992943	88.43	111	89	24.46	53.78	High	High	High	High	High	High	High	High	High	High	1
TRUE	High	Master Protein	Q6P1X6	UPF0598 protein C8orf82 [OS=Homo sapiens]	0	17.165	9	2	46	2	216	23.9	9.14	94.58	2	0	0	0.101	1.2228e-15	141.72	193.9	6.1	57.22	200.38	Peak Found	High	High	High	High	High	High	Peak Found	High	High	1
TRUE	High	Master Protein	Q08257	Quinone oxidoreductase [OS=Homo sapiens]	0	17.165	16	2	23	2	329	35.2	8.44	87.06	2	0	0	0.254	0.00017067	142.64	106	94	65.1	75.2	Not Found	High	High	High	High	High	High	Not Found	High	High	1
FALSE	High	Master Protein	P78347	General transcription factor II-I [OS=Homo sapiens]	0	17.149	8	5	11	5	998	112.3	6.39	14.95	5	0	0	2.788	0.264323	108.47	51.5	148.5	65.97	105.34	Not Found	High	High	High	Peak Found	High	Peak Found	High	Peak Found	Not Found	1
FALSE	High	Master Protein	Q15717	ELAV-like protein 1 [OS=Homo sapiens]	0	17.146	11	2	10	2	326	36.1	9.17	26.4	2	0	0	0.748	0.955513	72.38	147.3	52.7	82.32	79.67	High	High	High	High	Peak Found	High	Peak Found	High	Peak Found	Not Found	1
FALSE	High	Master Protein	Q9BRA2	Thioredoxin domain-containing protein 17 [OS=Homo sapiens]	0	17.116	35	3	108	3	123	13.9	5.52	315.62	3	0	0	0.972	0.929425	122.03	109.6	90.4	34.36	67.63	Not Found	High	High	High	High	High	High	High	High	High	1
FALSE	High	Master Protein	P07919	Cytochrome b-c1 complex subunit 6, mitochondrial [OS=Homo sapiens]	0	17.111	20	1	21	1	91	10.7	4.44	43.86	1	0	0	0.463	0.188188	44.23	132.7	67.3	47.27	22.29	Not Found	High	High	High	High	High	Peak Found	High	High	High	1
FALSE	High	Master Protein	Q14789	Golgin subfamily B member 1 [OS=Homo sapiens]	0	17.096	3	6	9	6	3259	375.8	5	19.42	6	0	0	0.315	0.411261	96.5	165.2	34.8	59.37	91.83	Peak Found	High	High	High	High	High	Peak Found	High	Not Found	High	1
FALSE	High	Master Protein	Q53FA7	Quinone oxidoreductase PIG3 [OS=Homo sapiens]	0	17.077	17	3	18	3	332	35.5	7.17	59.67	3	0	0	0.843	0.996803	59.51	100.9	99.1	72.16	80.33	Not Found	High	High	High	High	High	High	High	High	High	1	Acetyl [N-Term]
TRUE	High	Master Protein	Q5JWF2	Guanine nucleotide-binding protein G(s) subunit alpha isoforms XLas [OS=Homo sapiens]	0	17.052	7	5	17	4	1037	111	5.03	32.63	5	0	0	0.211	0.0413387	117.91	131.9	68.1	84.18	75.24	Peak Found	Not Found	Peak Found	Not Found	High	Peak Found	High	High	High	High	1
FALSE	High	Master Protein	Q9P291	Armadillo repeat-containing X-linked protein 1 [OS=Homo sapiens]	0	17.007	12	3	7	3	453	49.2	9.22	27.73	3	0	0	1.214	0.938649	138.93	65.5	134.5	9.07	125.42	Not Found	Peak Found	High	High	Not Found	High	High	High	Peak Found	Not Found	1
FALSE	High	Master Protein	Q7Z434	Mitochondrial antiviral-signaling protein [OS=Homo sapiens]	0	16.99	18	4	16	4	540	56.5	5.52	35.6	4	0	0	0.751	0.924788	23.16	175.5	24.5	32.92	36.4	Peak Found	High	High	Peak Found	High	Peak Found	High	High	High	High	1
FALSE	High	Master Protein	Q9P2B2	Prostaglandin F2 receptor negative regulator [OS=Homo sapiens]	0	16.971	8	4	10	4	879	98.5	6.61	15.17	4	0	0	1.153	0.840092	61.23	95.4	104.6	29.56	91.09	Not Found	Peak Found	Not Found	High	Peak Found	High	High	High	High	High	1
TRUE	High	Master Protein	Q15428	Splicing factor 3A subunit 2 [OS=Homo sapiens]	0	16.942	6	2	6	2	464	49.2	9.64	15.87	2	0	0	16.853	5.91543e-09	78.32	10.1	189.9	66.06		Not Found	High	Not Found	High	Not Found	Not Found	Not Found	High	Not Found	Not Found	1
FALSE	High	Master Protein	Q9NRX4	14 kDa phosphohistidine phosphatase [OS=Homo sapiens]	0	16.928	36	3	34	3	125	13.8	6.07	48.41	3	0	0	0.64	0.82957	110.56	126.2	73.8	98.57	92.37	Not Found	High	High	High	Peak Found	Not Found	High	High	High	High	1
FALSE	High	Master Protein	Q9NZA1	Chloride intracellular channel protein 5 [OS=Homo sapiens]	0	16.898	10	3	25	2	410	46.5	4.82	49.37	3	0	0	1.809	0.493896	47.21	34.5	165.5	113.83	60.72	Not Found	Not Found	Not Found	Peak Found	Peak Found	Not Found	Peak Found	High	High	Peak Found	1
FALSE	High	Master Protein	Q8N0X4	Citramalyl-CoA lyase, mitochondrial [OS=Homo sapiens]	0	16.89	11	3	12	3	340	37.3	8.73	24.68	3	0	0	1.008	0.910947	81.28	131.1	68.9	99.12	61.14	High	High	High	High	High	Not Found	Peak Found	High	High	High	1
FALSE	High	Master Protein	O00217	NADH dehydrogenase [ubiquinone] iron-sulfur protein 8, mitochondrial [OS=Homo sapiens]	0	16.88	20	3	27	3	210	23.7	6.34	79.35	3	0	0	0.638	0.411302	85.18	117.2	82.8	71.25	22.12	Peak Found	High	High	High	High	High	High	High	High	High	1
FALSE	High	Master Protein	P13646	Keratin, type I cytoskeletal 13 [OS=Homo sapiens]	0	16.859	12	4	27	1	458	49.6	4.96	41.15	4	0	0	0.425	0.411782	0	140.3	59.7			Not Found	Peak Found	Not Found	Not Found	Not Found	Not Found	Not Found	Not Found	High	Not Found	1
FALSE	High	Master Protein	Q15369	Elongin-C [OS=Homo sapiens]	0	16.808	25	2	46	2	112	12.5	4.78	92.88	2	0	0	0.876	0.970218	113.41	134.1	65.9	54.02	103.05	High	High	High	High	High	High	High	High	High	High	1
TRUE	High	Master Protein	P29992	Guanine nucleotide-binding protein subunit alpha-11 [OS=Homo sapiens]	0	16.807	16	4	5	4	359	42.1	5.69	10.66	4	0	0	17.376	6.64213e-05	87.02	9.4	190.6	86.56	82.53	Peak Found	Peak Found	Not Found	Peak Found	Not Found	Not Found	Peak Found	High	Peak Found	Peak Found	1
FALSE	High	Master Protein	P35520	Cystathionine beta-synthase [OS=Homo sapiens]	0	16.804	9	2	7	2	551	60.5	6.65	26.73	2	0	0	0.715	0.984618	125.44	150.7	49.3	110.63	50.93	Not Found	Peak Found	High	High	Not Found	Not Found	Not Found	Peak Found	High	Peak Found	1
FALSE	High	Master Protein	Q96RU2	Ubiquitin carboxyl-terminal hydrolase 28 [OS=Homo sapiens]	0	16.789	7	4	15	4	1077	122.4	5.2	31.73	4	0	0	1.123	0.755196	48.24	96.4	103.6	64.49	11.01	Peak Found	Peak Found	High	Peak Found	High	High	High	Not Found	Peak Found	High	1
FALSE	High	Master Protein	Q9UBE0	SUMO-activating enzyme subunit 1 [OS=Homo sapiens]	0	16.76	19	3	21	3	346	38.4	5.3	39.34	3	0	0	0.445	0.619258	95.5	148.7	51.3	83.34	65.91	Peak Found	High	Peak Found	High	High	Peak Found	High	High	High	High	1
FALSE	High	Master Protein	P02751	Fibronectin [OS=Homo sapiens]	0	16.759	3	3	10	3	2477	272.2	5.5	30.99	3	0	0	1.024	0.872653	98.61	98.8	101.2	119.48	98.8	High	High	Not Found	High	Not Found	Not Found	High	High	High	Not Found	1
FALSE	High	Master Protein	Q13561	Dynactin subunit 2 [OS=Homo sapiens]	0	16.75	17	4	18	4	401	44.2	5.21	30.18	4	0	0	1.906	0.241721	109.68	102.9	97.1	129.88	156.95	Not Found	High	High	High	Not Found	High	High	High	High	Peak Found	1
FALSE	High	Master Protein	P48637	Glutathione synthetase [OS=Homo sapiens]	0	16.715	16	5	9	5	474	52.4	5.92	13.66	5	0	0	0.471	0.198327	102.65	140.1	59.9	62.25	88.06	Not Found	Peak Found	Peak Found	Not Found	High	Not Found	Peak Found	High	High	Peak Found	1
FALSE	High	Master Protein	P04062	Lysosomal acid glucosylceramidase [OS=Homo sapiens]	0	16.697	7	2	10	2	536	59.7	7.61	43.35	2	0	0	0.906	0.950575	45.38	108.2	91.8	35.34	32.54	Not Found	High	High	High	High	Not Found	High	High	High	High	1
FALSE	High	Master Protein	Q9NS69	Mitochondrial import receptor subunit TOM22 homolog [OS=Homo sapiens]	0	16.694	29	2	52	2	142	15.5	4.34	193.95	2	0	0	0.69	0.882314	113.56	114.4	85.6	80.06	104.26	Not Found	High	High	High	High	High	High	High	High	High	1
FALSE	High	Master Protein	P45973	Chromobox protein homolog 5 [OS=Homo sapiens]	0	16.602	13	2	113	1	191	22.2	5.86	257.12	2	0	0	1.354	0.536269	116.48	84.9	115.1	60.95	80.14	Not Found	Peak Found	Peak Found	High	Not Found	Not Found	High	Peak Found	Peak Found	Not Found	1
FALSE	High	Master Protein	O95816	BAG family molecular chaperone regulator 2 [OS=Homo sapiens]	0	16.6	23	3	34	3	211	23.8	6.7	81.24	3	0	0	0.825	0.944462	110.25	112.6	87.4	63.17	119.84	Not Found	High	High	Peak Found	High	High	High	High	High	High	1
FALSE	High	Master Protein	Q96GD0	Chronophin [OS=Homo sapiens]	0	16.572	16	3	60	3	296	31.7	6.55	130.82	3	0	0	0.845	0.980195	82.25	105.2	94.8	57.45	54.46	Peak Found	High	High	High	High	High	High	High	High	High	1
TRUE	High	Master Protein	Q13045	Protein flightless-1 homolog [OS=Homo sapiens]	0	16.564	4	4	10	4	1269	144.7	6.05	28.48	4	0	0	0.16	0.0117545	11.76	155	45	5.12	66.56	Not Found	High	High	High	High	Peak Found	High	High	Not Found	High	1
FALSE	High	Master Protein	P30740	Leukocyte elastase inhibitor [OS=Homo sapiens]	0	16.51	8	2	15	1	379	42.7	6.28	26.28	2	0	0	0.632	0.925504	50.23	122.6	77.4		74.98	Not Found	Not Found	Not Found	Not Found	High	High	Peak Found	High	Not Found	High	1
TRUE	High	Master Protein	O43148	mRNA cap guanine-N7 methyltransferase [OS=Homo sapiens]	0	16.507	17	4	13	4	476	54.8	6.61	19.02	4	0	0	3.322	0.0909321	107.75	76.7	123.3	87.25	62.21	Peak Found	High	High	High	Peak Found	Not Found	Peak Found	High	High	Not Found	1
FALSE	High	Master Protein	Q96HY7	2-oxoadipate dehydrogenase complex component E1 [OS=Homo sapiens]	0	16.496	6	3	28	3	919	103	6.93	75.65	3	0	0	0.774	0.960928	91.19	116.4	83.6	67.48	61.43	Not Found	High	High	High	High	High	High	Peak Found	High	High	1
FALSE	High	Master Protein	Q07507	Dermatopontin [OS=Homo sapiens]	0	16.482	18	2	31	2	201	24	4.82	69.56	2	0	0	1.441	0.344423	126.59	55.3	144.7	90.02	68.61	High	High	High	Peak Found	High	Not Found	Peak Found	High	High	High	1
FALSE	High	Master Protein	Q86X83	COMM domain-containing protein 2 [OS=Homo sapiens]	0	16.452	25	3	12	3	199	22.7	6.73	26.17	3	0	0	1.095	0.825043	58.39	114.8	85.2	50.46	57.56	Not Found	High	High	Peak Found	High	Peak Found	Not Found	High	Not Found	High	1
FALSE	High	Master Protein	Q92544	Transmembrane 9 superfamily member 4 [OS=Homo sapiens]	0	16.448	9	3	18	3	642	74.5	6.54	60.55	3	0	0	0.785	0.954709	48.09	114.6	85.4	28.11	43.3	Not Found	High	High	Peak Found	High	Peak Found	High	High	High	High	1
FALSE	High	Master Protein	O95394	Phosphoacetylglucosamine mutase [OS=Homo sapiens]	0	16.418	14	3	10	3	542	59.8	6.25	16.2	3	0	0	0.627	0.92484	54.28	122.8	77.2	45.96	51.81	Not Found	Peak Found	High	Peak Found	High	Peak Found	Peak Found	High	High	High	1
FALSE	High	Master Protein	Q9Y3C8	Ubiquitin-fold modifier-conjugating enzyme 1 [OS=Homo sapiens]	0	16.391	20	2	15	2	167	19.4	7.4	42.38	2	0	0	1.819	0.540508	96.41	74.5	125.5	153.63	56.04	Peak Found	Peak Found	High	High	High	High	High	High	High	High	1
FALSE	High	Master Protein	Q9Y2V2	Calcium-regulated heat-stable protein 1 [OS=Homo sapiens]	0	16.312	35	2	68	2	147	15.9	8.21	208.49	2	0	0	1.058	0.853543	80.55	108	92	62.54	59.8	High	High	High	High	High	High	High	High	High	High	1
FALSE	High	Master Protein	P28161	Glutathione S-transferase Mu 2 [OS=Homo sapiens]	0	16.312	29	4	30	3	218	25.7	6.37	50.76	4	0	1	1.522	0.469171	107.7	93	107	38.58	49.61	Not Found	High	High	High	High	Peak Found	High	High	High	High	1
TRUE	High	Master Protein	Q13153	Serine/threonine-protein kinase PAK 1 [OS=Homo sapiens]	0	16.298	12	3	17	2	545	60.6	5.76	36.99	3	0	0	0.01	5.5167e-17		200		121.16		High	Peak Found	High	Peak Found	High	High	Not Found	High	Not Found	Not Found	1
FALSE	High	Master Protein	O96019	Actin-like protein 6A [OS=Homo sapiens]	0	16.267	7	2	6	2	429	47.4	5.6	18.06	2	0	0	1.33	0.671358	104.55	125.9	74.1	68.4	24.31	Not Found	High	Peak Found	Peak Found	High	Peak Found	Peak Found	High	Peak Found	High	1
FALSE	High	Master Protein	Q03001	Dystonin [OS=Homo sapiens]	0	16.255	1	5	9	4	7570	860.1	5.25	14.96	5	0	0	0.789	0.996579	83.96	42.3	157.7	105.55	99.11	Not Found	Peak Found	Not Found	Not Found	High	Not Found	Not Found	High	Not Found	High	1
FALSE	High	Master Protein	P19784	Casein kinase II subunit alpha' [OS=Homo sapiens]	0	16.193	15	3	20	3	350	41.2	8.56	42.54	3	0	0	0.755	0.954709	88.13	114	86	48.86	94.67	Not Found	High	High	High	High	Peak Found	High	High	High	High	1
FALSE	High	Master Protein	P17050	Alpha-N-acetylgalactosaminidase [OS=Homo sapiens]	0	16.184	15	4	10	4	411	46.5	5.19	24.2	4	0	0	1.475	0.616154	145.28	84.5	115.5	98.55	143.99	High	Peak Found	High	High	Peak Found	High	High	Peak Found	High	Not Found	1
FALSE	High	Master Protein	Q9P0J7	E3 ubiquitin-protein ligase KCMF1 [OS=Homo sapiens]	0	16.15	11	2	14	2	381	41.9	5.66	47.72	2	0	0	0.777	0.994228	93.9	116.4	83.6	72.44	46.41	High	High	High	High	High	High	Peak Found	High	High	Peak Found	1
FALSE	High	Master Protein	Q9H4A4	Aminopeptidase B [OS=Homo sapiens]	0	16.128	10	3	11	3	650	72.5	5.74	35.81	3	0	0	0.774	0.932413	109.16	115.1	84.9	86.19	57.11	Not Found	High	High	High	Peak Found	Not Found	High	High	High	High	1
FALSE	High	Master Protein	Q15813	Tubulin-specific chaperone E [OS=Homo sapiens]	0	16.113	8	2	11	2	527	59.3	6.76	41.93	2	0	0	0.826	0.996793	64.31	135	65	33.27	75.08	Not Found	High	High	High	High	High	High	High	High	High	1
FALSE	High	Master Protein	O75832	26S proteasome non-ATPase regulatory subunit 10 [OS=Homo sapiens]	0	16.103	26	3	20	3	226	24.4	6.1	43.6	3	0	0	0.813	0.98526	115.13	101.3	98.7	167.4	70.06	High	High	High	High	Peak Found	High	High	High	High	High	1	Acetyl [N-Term]
FALSE	High	Master Protein	Q16082	Heat shock protein beta-2 [OS=Homo sapiens]	0	16.076	25	3	45	3	182	20.2	5.17	138.35	3	0	0	0.894	0.995831	99.41	83.9	116.1	83.91	64.51	High	High	Peak Found	High	High	High	High	High	Peak Found	High	1
FALSE	High	Master Protein	Q9Y3D6	Mitochondrial fission 1 protein [OS=Homo sapiens]	0	16.055	29	3	34	3	152	16.9	8.79	110.62	3	0	0	0.496	0.407545	117.65	114.4	85.6	100.48	76.99	High	High	High	High	High	High	High	High	High	High	1	Acetyl [N-Term]
TRUE	High	Master Protein	Q7L576	Cytoplasmic FMR1-interacting protein 1 [OS=Homo sapiens]	0	16.05	4	4	8	3	1253	145.1	6.9	16.14	4	0	2	0.132	0.0656119	32.75	139.4	60.6	60.7	129.29	Not Found	Peak Found	Not Found	Not Found	High	High	Not Found	Peak Found	Peak Found	Not Found	1
FALSE	High	Master Protein	Q13404	Ubiquitin-conjugating enzyme E2 variant 1 [OS=Homo sapiens]	0	16.029	21	2	33	2	147	16.5	7.93	70.4	2	0	0	0.705	0.871261	87.93	126.3	73.7	44.26	29.25	High	High	High	High	High	High	High	High	High	High	1
FALSE	High	Master Protein	P03915	NADH-ubiquinone oxidoreductase chain 5 [OS=Homo sapiens]	0	16.012	3	1	13	1	603	67	9.03	39.33	1	0	0	0.582	0.638822	62.21	97.8	102.2	81.76	82.19	Not Found	Peak Found	High	High	High	Peak Found	High	High	High	High	1
FALSE	High	Master Protein	P31937	3-hydroxyisobutyrate dehydrogenase, mitochondrial [OS=Homo sapiens]	0	16.006	12	3	56	3	336	35.3	8.13	147.42	3	0	0	1.266	0.577544	60.55	89.7	110.3	69.38	41.82	Peak Found	High	High	High	High	High	High	High	High	High	1
FALSE	High	Master Protein	Q99471	Prefoldin subunit 5 [OS=Homo sapiens]	0	15.999	22	2	20	2	154	17.3	6.33	60.52	2	0	0	0.38	0.264948	127.83	164.1	35.9	58.62	135.33	High	High	High	Peak Found	High	Peak Found	High	High	Not Found	High	1
TRUE	High	Master Protein	Q99816	Tumor susceptibility gene 101 protein [OS=Homo sapiens]	0	15.98	20	5	5	5	390	43.9	6.46	10.84	5	0	0	0.134	0.0152316	19.88	166.2	33.8	55.94	73.68	Not Found	Peak Found	High	Peak Found	Not Found	Not Found	Not Found	High	Not Found	High	1
FALSE	High	Master Protein	P13674	Prolyl 4-hydroxylase subunit alpha-1 [OS=Homo sapiens]	0	15.967	11	4	8	4	534	61	6.01	17.29	4	0	0	0.649	0.795911	120.99	36.1	163.9	93.01	20.97	Not Found	High	High	High	Peak Found	Not Found	Peak Found	High	Peak Found	High	1
FALSE	High	Master Protein	O75165	DnaJ homolog subfamily C member 13 [OS=Homo sapiens]	0	15.964	3	5	13	5	2243	254.3	6.74	18.9	5	0	0	0.337	0.388917	88.88	97.5	102.5	100.05	66.18	Not Found	High	High	High	High	High	High	High	Not Found	High	1
TRUE	High	Master Protein	P22830	Ferrochelatase, mitochondrial [OS=Homo sapiens]	0	15.962	13	3	6	3	423	47.8	8.73	17.63	3	0	0	3.488	0.0863355	101.07	28.9	171.1	100.7	19.99	Not Found	Peak Found	Peak Found	High	Peak Found	High	Peak Found	High	High	High	1
TRUE	High	Master Protein	P12111	Collagen alpha-3(VI) chain [OS=Homo sapiens]	0	15.935	2	4	7	4	3177	343.5	6.68	16.83	4	0	0	26.306	2.97555e-12	52.3	2.4	197.6	41.83		Not Found	High	Peak Found	Peak Found	Not Found	Not Found	Not Found	High	Not Found	Not Found	1
TRUE	High	Master Protein	P63279	SUMO-conjugating enzyme UBC9 [OS=Homo sapiens]	0	15.924	35	4	10	4	158	18	8.66	26.02	4	0	0	0.227	0.0208533	101.23	164.7	35.3	145.67	111.32	High	Peak Found	Not Found	High	High	Peak Found	High	High	Not Found	High	1
FALSE	High	Master Protein	O60739	Eukaryotic translation initiation factor 1b [OS=Homo sapiens]	0	15.919	47	3	19	3	113	12.8	7.37	54.99	3	0	0	0.621	0.825043	119.44	125.8	74.2	65.69	45.82	Peak Found	High	High	High	Not Found	Peak Found	High	High	High	Peak Found	1
FALSE	High	Master Protein	Q5JTZ9	Alanine--tRNA ligase, mitochondrial [OS=Homo sapiens]	0	15.908	6	4	26	4	985	107.3	6.27	66.93	4	0	0	0.703	0.917537	92.58	97.9	102.1	80.2	63.55	Peak Found	High	High	High	High	Peak Found	High	High	High	High	1
FALSE	High	Master Protein	Q96C23	Galactose mutarotase [OS=Homo sapiens]	0	15.883	18	3	18	3	342	37.7	6.65	22.92	3	0	0	0.47	0.337316	78.02	128.9	71.1	54.92	92.64	High	High	High	High	High	High	Peak Found	High	High	High	1
FALSE	High	Master Protein	P02768	Albumin [OS=Homo sapiens]	0	15.863	5	4	24	4	609	69.3	6.28	56.96	4	0	0	0.363	0.559987	127.55	169	31	81.68	205.1	High	High	High	High	High	Peak Found	High	High	Peak Found	Peak Found	1
FALSE	High	Master Protein	Q52LJ0	Protein FAM98B [OS=Homo sapiens]	0	15.861	15	4	43	3	433	45.5	8.69	113.94	4	0	0	0.344	0.197148	88.97	102.4	97.6	119.89	19.72	Not Found	Peak Found	Not Found	Peak Found	High	Not Found	High	High	High	High	1
FALSE	High	Master Protein	Q9Y6Y8	SEC23-interacting protein [OS=Homo sapiens]	0	15.845	8	4	12	4	1000	111	5.54	29.03	4	0	0	0.484	0.713587	48.61	136.9	63.1	53.33	82.91	Peak Found	High	High	Peak Found	High	Peak Found	Peak Found	High	High	High	1
TRUE	High	Master Protein	Q15005	Signal peptidase complex subunit 2 [OS=Homo sapiens]	0	15.845	17	2	24	2	226	25	8.47	66.32	2	0	0	0.216	0.049809	121.61	164.5	35.5	67.03	132.21	Not Found	High	High	High	High	Peak Found	High	Peak Found	High	High	1
FALSE	High	Master Protein	Q3ZCQ8	Mitochondrial import inner membrane translocase subunit TIM50 [OS=Homo sapiens]	0	15.842	12	3	11	3	353	39.6	8.37	28.33	3	0	0	1.308	0.458613	74	50.8	149.2	57.3	50.88	Not Found	High	High	Peak Found	High	High	Peak Found	High	High	High	1
FALSE	High	Master Protein	Q14011	Cold-inducible RNA-binding protein [OS=Homo sapiens]	0	15.726	19	2	41	2	172	18.6	9.51	105.98	2	0	0	1.005	0.918606	45.9	89.2	110.8	25.7	30.27	High	High	High	High	High	High	High	High	High	High	1
FALSE	High	Master Protein	P62879	Guanine nucleotide-binding protein G(I)/G(S)/G(T) subunit beta-2 [OS=Homo sapiens]	0	15.686	14	3	13	2	340	37.3	6	34.38	3	0	0	0.885	0.981508	83.89	86.5	113.5	55.61	64.49	Not Found	High	High	Peak Found	High	Peak Found	High	High	High	High	1
TRUE	High	Master Protein	O43615	Mitochondrial import inner membrane translocase subunit TIM44 [OS=Homo sapiens]	0	15.668	13	4	6	4	452	51.3	8.32	13.5	4	0	0	11.867	1.45205e-05	0	4.9	195.1			Not Found	Not Found	Peak Found	Not Found	Not Found	Not Found	Not Found	High	High	Not Found	1
FALSE	High	Master Protein	Q9NR31	GTP-binding protein SAR1a [OS=Homo sapiens]	0	15.663	24	3	12	2	198	22.4	6.68	37.49	3	0	1	1.689	0.249906	89.47	52.1	147.9	58.82	43.76	Not Found	High	High	Peak Found	High	High	High	High	High	High	1
FALSE	High	Master Protein	Q14524	Sodium channel protein type 5 subunit alpha [OS=Homo sapiens]	0	15.662	2	2	10	2	2016	226.8	5.49	24.04	2	0	0	0.455	0.762196	126.77	164.4	35.6	146.26	81.96	High	High	High	High	Peak Found	Peak Found	Not Found	High	Peak Found	Peak Found	1
FALSE	High	Master Protein	Q02338	D-beta-hydroxybutyrate dehydrogenase, mitochondrial [OS=Homo sapiens]	0	15.659	16	4	23	4	343	38.1	8.95	40.52	4	0	0	0.75	0.955513	97.67	117.9	82.1	52.7	66.18	High	High	High	Peak Found	Peak Found	High	High	High	Peak Found	Not Found	1
FALSE	High	Master Protein	O75534	Cold shock domain-containing protein E1 [OS=Homo sapiens]	0	15.654	8	3	9	3	798	88.8	6.25	28.82	3	0	0	0.723	0.816486	66.93	106.6	93.4	40.11	43.54	Peak Found	Peak Found	High	High	High	Not Found	Peak Found	High	High	High	1
FALSE	High	Master Protein	O15173	Membrane-associated progesterone receptor component 2 [OS=Homo sapiens]	0	15.634	16	2	24	2	223	23.8	4.88	81.18	2	0	0	0.542	0.752555	101.85	103.8	96.2	74.08	113.16	Peak Found	High	High	High	High	Peak Found	High	High	High	High	1
TRUE	High	Master Protein	P48163	NADP-dependent malic enzyme [OS=Homo sapiens]	0	15.619	12	3	10	3	572	64.1	6.13	29.46	3	0	0	2.787	0.00776285	107.66	54.5	145.5	90.38	98.12	Not Found	High	High	High	Peak Found	Peak Found	Peak Found	High	High	Not Found	1
FALSE	High	Master Protein	Q9Y6C9	Mitochondrial carrier homolog 2 [OS=Homo sapiens]	0	15.607	7	2	11	2	303	33.3	7.97	41.1	2	0	0	1.302	0.465481	61.1	77.6	122.4	23.6	40.23	Peak Found	High	High	Peak Found	High	High	High	High	High	High	1
TRUE	High	Master Protein	Q15056	Eukaryotic translation initiation factor 4H [OS=Homo sapiens]	0	15.597	21	2	8	2	248	27.4	7.23	17.8	2	0	0	100	5.5167e-17			200		28.57	Not Found	Not Found	Not Found	Not Found	High	Not Found	High	High	Peak Found	Not Found	1
FALSE	High	Master Protein	Q96A26	Protein FAM162A [OS=Homo sapiens]	0	15.569	13	3	11	3	154	17.3	9.77	35.42	3	0	0	0.485	0.537142	116.84	153	47	95.54	76.42	Not Found	Peak Found	Not Found	High	Peak Found	High	High	High	Peak Found	High	1
TRUE	High	Master Protein	P39748	Flap endonuclease 1 [OS=Homo sapiens]	0	15.547	14	3	8	3	380	42.6	8.62	24.56	3	0	0	3.806	0.000200871	5.75	140	60	60.82	77.72	Not Found	Peak Found	Peak Found	High	High	Not Found	High	High	Not Found	High	1
FALSE	High	Master Protein	O60256	Phosphoribosyl pyrophosphate synthase-associated protein 2 [OS=Homo sapiens]	0	15.546	17	4	5	4	369	40.9	7.44	13.54	4	0	0	0.641	0.894987	72.1	111.2	88.8	35.89	73.73	Peak Found	Peak Found	High	Not Found	Peak Found	Peak Found	Peak Found	High	Not Found	Peak Found	1
FALSE	High	Master Protein	Q14126	Desmoglein-2 [OS=Homo sapiens]	0	15.541	7	4	25	4	1118	122.2	5.24	47.44	4	0	0	0.58	0.88118	98.38	128.9	71.1	73.13	59.03	High	High	High	High	High	High	High	High	High	High	1
FALSE	High	Master Protein	Q15477	Helicase SKI2W [OS=Homo sapiens]	0	15.513	4	3	6	3	1246	137.7	6.06	16.36	3	0	0				78.9	121.1	38.79		Not Found	Peak Found	High	High	Not Found	Not Found	High	High	Not Found	Not Found	1
FALSE	High	Master Protein	Q9BTW9	Tubulin-specific chaperone D [OS=Homo sapiens]	0	15.484	6	4	5	4	1192	132.5	6.19	10.68	4	0	0	1.273	0.703992	38.63	109.1	90.9	35.66	56.54	Not Found	Peak Found	High	Not Found	High	Not Found	Not Found	High	Peak Found	Not Found	1
FALSE	High	Master Protein	O14818	Proteasome subunit alpha type-7 [OS=Homo sapiens]	0	15.469	20	3	16	3	248	27.9	8.46	56.06	3	0	0	0.914	0.977232	69.48	88.8	111.2	89.51	32.9	Peak Found	High	High	High	High	High	High	High	High	High	1
FALSE	High	Master Protein	O14602	Eukaryotic translation initiation factor 1A, Y-chromosomal [OS=Homo sapiens]	0	15.452	38	3	13	3	144	16.4	5.24	32.45	3	0	0	0.97	0.921608	104.91	97.1	102.9	82.72	34.31	High	High	High	High	High	High	Peak Found	High	High	High	1
FALSE	High	Master Protein	Q9H3K6	BolA-like protein 2 [OS=Homo sapiens]	0	15.439	41	2	10	2	86	10.1	6.52	26	2	0	0	2.117	0.211965	122.52	66.9	133.1	105.05	17.23	Not Found	High	High	High	Peak Found	High	Peak Found	High	High	High	1
TRUE	High	Master Protein	Q86TP1	Exopolyphosphatase PRUNE1 [OS=Homo sapiens]	0	15.424	20	4	9	4	453	50.2	5.5	14.4	4	0	0	3.632	0.0685316	120.8	158.3	41.7	59.26	138.3	Not Found	High	High	High	Peak Found	Not Found	Peak Found	High	High	Peak Found	1
FALSE	High	Master Protein	P49720	Proteasome subunit beta type-3 [OS=Homo sapiens]	0	15.399	19	3	21	3	205	22.9	6.55	67.89	3	0	0	1.315	0.426989	78.88	74.6	125.4	37.89	83.06	High	High	Peak Found	High	High	High	Peak Found	High	High	High	1
TRUE	High	Master Protein	P26583	High mobility group protein B2 [OS=Homo sapiens]	0	15.389	20	3	10	2	209	24	7.81	21.58	3	0	0	2.676	0.153774	17.66	52.3	147.7		67.57	Not Found	Not Found	Not Found	Not Found	High	High	High	High	Not Found	High	1
FALSE	High	Master Protein	Q8N766	ER membrane protein complex subunit 1 [OS=Homo sapiens]	0	15.361	10	5	14	5	993	111.7	7.66	22.75	5	0	0	2.141	0.329935	117.81	57.5	142.5	115.59	69.27	Peak Found	High	Peak Found	Peak Found	High	High	High	High	Not Found	High	1
FALSE	High	Master Protein	P21964	Catechol O-methyltransferase [OS=Homo sapiens]	0	15.361	18	3	30	3	271	30	5.47	50.34	3	0	0	0.405	0.417756	107.46	109.6	90.4	56.08	70.1	High	High	High	High	High	Not Found	High	High	High	High	1
FALSE	High	Master Protein	Q9UMX0	Ubiquilin-1 [OS=Homo sapiens]	0	15.333	9	3	13	2	589	62.5	5.11	21.83	3	0	1	0.378	0.172199	48.93	150.7	49.3	21.27	53.79	Peak Found	High	High	High	High	Peak Found	High	High	Not Found	High	1
FALSE	High	Master Protein	Q9BW92	Threonine--tRNA ligase, mitochondrial [OS=Homo sapiens]	0	15.319	7	3	13	3	718	81	7.3	36.52	3	0	0	1.105	0.815997	115.58	88.6	111.4	91.4	17.15	High	High	High	Peak Found	Peak Found	Not Found	High	High	High	High	1
FALSE	High	Master Protein	O43432	Eukaryotic translation initiation factor 4 gamma 3 [OS=Homo sapiens]	0	15.275	3	3	8	3	1585	176.5	5.38	20.22	3	0	0	0.347	0.548566	74.64	147.1	52.9	80.39	95.21	High	High	High	High	Peak Found	Peak Found	High	High	Not Found	Peak Found	1
FALSE	High	Master Protein	Q01085	Nucleolysin TIAR [OS=Homo sapiens]	0	15.26	16	3	11	3	375	41.6	7.74	36.84	3	0	0	0.747	0.950665	88.04	133.5	66.5	37.37	74.93	Not Found	High	Peak Found	High	Peak Found	High	High	High	Peak Found	High	1
FALSE	High	Master Protein	P49406	39S ribosomal protein L19, mitochondrial [OS=Homo sapiens]	0	15.137	19	4	17	4	292	33.5	9.5	45.96	4	0	0	0.515	0.586795	104.99	132.8	67.2	40.05	51.47	High	High	High	High	High	Peak Found	High	High	High	High	1
FALSE	High	Master Protein	P42566	Epidermal growth factor receptor substrate 15 [OS=Homo sapiens]	0	15.108	6	3	24	3	896	98.6	4.64	57.72	3	0	0	0.652	0.844692	47.35	120.6	79.4	33.3	11.18	Not Found	High	High	High	High	High	High	Peak Found	High	High	1
FALSE	High	Master Protein	Q9UN86	Ras GTPase-activating protein-binding protein 2 [OS=Homo sapiens]	0	15.106	11	4	8	4	482	54.1	5.55	7.37	4	0	0	0.562	0.76556	84.77	34.8	165.2	144.1	45.04	Not Found	Peak Found	Peak Found	High	High	Peak Found	Peak Found	High	Peak Found	High	1
TRUE	High	Master Protein	Q9BWM7	Sideroflexin-3 [OS=Homo sapiens]	0	15.093	13	3	9	2	321	35.5	9.1	35.96	3	0	0	100	5.5167e-17			200			Not Found	Not Found	Not Found	Not Found	Not Found	Not Found	Not Found	High	Not Found	Not Found	1
FALSE	High	Master Protein	Q8NBI6	Xyloside xylosyltransferase 1 [OS=Homo sapiens]	0	15.083	13	3	5	3	393	43.8	8.13	11.57	3	0	0	0.354	0.437048	111.89	112.6	87.4	65.61	76.23	Not Found	High	High	Peak Found	High	Peak Found	Peak Found	Not Found	Peak Found	High	1
TRUE	High	Master Protein	P08195	4F2 cell-surface antigen heavy chain [OS=Homo sapiens]	0	15.075	6	2	4	2	630	68	5.01	15.26	2	0	0	100	5.5167e-17			200		31.39	Not Found	Not Found	High	Not Found	Not Found	High	Peak Found	High	High	Not Found	1
FALSE	High	Master Protein	P57105	Synaptojanin-2-binding protein [OS=Homo sapiens]	0	15.066	28	2	44	2	145	15.9	6.3	164.34	2	0	0	0.809	0.975284	113.77	133.8	66.2	52.95	81.05	High	High	High	High	High	High	High	High	High	High	1
FALSE	High	Master Protein	Q96EP5	DAZ-associated protein 1 [OS=Homo sapiens]	0	15.048	15	3	8	3	407	43.4	8.56	22.83	3	0	0	1.466	0.521683	81.23	88.4	111.6	115.99	90.69	Not Found	Peak Found	High	Peak Found	High	High	High	High	High	Peak Found	1
TRUE	High	Master Protein	Q7L5N1	COP9 signalosome complex subunit 6 [OS=Homo sapiens]	0	15.044	15	3	15	3	327	36.1	5.73	39.27	3	0	0	6.127	9.94158e-12	71.71	25.7	174.3	71.81	30.24	Peak Found	High	High	High	High	Peak Found	Peak Found	High	High	High	1
TRUE	High	Master Protein	Q9BXP5	Serrate RNA effector molecule homolog [OS=Homo sapiens]	0	15.042	6	4	7	4	876	100.6	5.96	9.98	4	0	0	0.178	0.117489	2.64	142.9	57.1		87.54	Not Found	Not Found	Not Found	Not Found	High	Not Found	Peak Found	High	Not Found	High	1
FALSE	High	Master Protein	Q8TD19	Serine/threonine-protein kinase Nek9 [OS=Homo sapiens]	0	15.029	7	4	15	4	979	107.1	5.74	30.7	4	0	0	0.262	0.288649	98.39	122.5	77.5	80.99	88.55	High	High	High	Peak Found	High	Not Found	High	High	Peak Found	High	1
TRUE	High	Master Protein	Q96S97	Myeloid-associated differentiation marker [OS=Homo sapiens]	0	14.991	18	3	11	3	322	35.3	8.15	18.5	3	0	0	3.76	0.149088	132.45	48.8	151.2	67.03	130.08	Peak Found	High	High	Peak Found	High	Not Found	High	High	Not Found	High	1
FALSE	High	Master Protein	Q7Z4S6	Kinesin-like protein KIF21A [OS=Homo sapiens]	0	14.957	4	4	6	4	1674	187.1	6.42	11.85	4	0	0	0.767	0.932413	106.95	189.2	10.8	86.71	53.57	High	Peak Found	Peak Found	High	Peak Found	High	Not Found	High	High	High	1
FALSE	High	Master Protein	P31949	Protein S100-A11 [OS=Homo sapiens]	0	14.952	46	2	13	2	105	11.7	7.12	41.31	2	0	0	0.92	0.961659	43.92	81.4	118.6	42.6	48.84	Not Found	High	High	High	High	Peak Found	High	High	High	High	1
TRUE	High	Master Protein	Q96AG4	Leucine-rich repeat-containing protein 59 [OS=Homo sapiens]	0	14.833	15	3	32	3	307	34.9	9.57	71.22	3	0	0	2.822	0.0334515	91.81	91.3	108.7	78.88	73.16	Not Found	High	High	High	Not Found	High	High	High	High	Not Found	1
FALSE	High	Master Protein	O95571	Persulfide dioxygenase ETHE1, mitochondrial [OS=Homo sapiens]	0	14.738	18	2	21	2	254	27.9	6.83	44.13	2	0	0	0.813	0.966631	83.92	110.4	89.6	14.47	35.14	High	High	High	High	High	High	High	High	High	High	1
FALSE	High	Master Protein	P62081	40S ribosomal protein S7 [OS=Homo sapiens]	0	14.717	27	2	12	2	194	22.1	10.1	42.96	2	0	0	0.657	0.46775	78.69	68.6	131.4	79.28	29.86	Peak Found	High	High	High	High	High	High	High	High	High	1
FALSE	High	Master Protein	P61513	60S ribosomal protein L37a [OS=Homo sapiens]	0	14.684	20	1	64	1	92	10.3	10.43	158.44	1	0	0	1.045	0.871261	70.25	100.8	99.2	40.12	59.01	High	High	High	High	High	High	High	High	High	High	1
FALSE	High	Master Protein	Q9H0R4	Haloacid dehalogenase-like hydrolase domain-containing protein 2 [OS=Homo sapiens]	0	14.657	22	3	11	3	259	28.5	6.24	26.65	3	0	0	1.209	0.678231	103.03	66.1	133.9	73.26	25.73	Peak Found	High	High	High	Peak Found	High	High	High	High	High	1
FALSE	High	Master Protein	O00483	Cytochrome c oxidase subunit NDUFA4 [OS=Homo sapiens]	0	14.642	68	3	12	3	81	9.4	9.38	32.57	3	0	0	0.451	0.714188	108.68	136.8	63.2	98.75	90.77	Not Found	Peak Found	Peak Found	Peak Found	High	High	High	High	High	High	1
FALSE	High	Master Protein	O00330	Pyruvate dehydrogenase protein X component, mitochondrial [OS=Homo sapiens]	0	14.613	12	4	10	4	501	54.1	8.66	27.13	4	0	0	1.066	0.862465	119.43	95.2	104.8	165.34	67.43	Not Found	Peak Found	High	Peak Found	High	High	High	High	High	Not Found	1
FALSE	High	Master Protein	Q9BYD3	39S ribosomal protein L4, mitochondrial [OS=Homo sapiens]	0	14.612	12	2	11	2	311	34.9	9.72	26.9	2	0	0	1.273	0.691242	94.31	93.2	106.8	96.55	95.55	Not Found	High	High	Peak Found	High	Not Found	Peak Found	Peak Found	High	High	1
FALSE	High	Master Protein	Q96KR1	Zinc finger RNA-binding protein [OS=Homo sapiens]	0	14.498	6	4	7	4	1074	116.9	9.04	14.87	4	0	0	0.268	0.345805	133.59	167.8	32.2	56.89	115.44	Not Found	High	Peak Found	Not Found	High	Not Found	Peak Found	High	Not Found	High	1
FALSE	High	Master Protein	P60900	Proteasome subunit alpha type-6 [OS=Homo sapiens]	0	14.495	24	4	17	4	246	27.4	6.76	33.15	4	0	0	0.592	0.891334	139.98	175.7	24.3	100.14	172.28	Peak Found	High	High	High	Peak Found	High	Peak Found	High	High	Peak Found	1
FALSE	High	Master Protein	P49841	Glycogen synthase kinase-3 beta [OS=Homo sapiens]	0	14.495	10	2	11	2	420	46.7	8.78	40.12	2	0	0	0.896	0.975833	48.86	116.5	83.5	50.61	38.54	Not Found	Peak Found	High	High	High	High	High	High	Peak Found	High	1
FALSE	High	Master Protein	Q5H9R7	Serine/threonine-protein phosphatase 6 regulatory subunit 3 [OS=Homo sapiens]	0	14.471	5	2	15	2	873	97.6	4.6	53.21	2	0	0	0.72	0.95177	91.56	116.3	83.7	38.22	83.46	Not Found	High	High	High	High	High	Peak Found	High	High	High	1
FALSE	High	Master Protein	Q15126	Phosphomevalonate kinase [OS=Homo sapiens]	0	14.469	21	4	17	4	192	22	5.73	27.8	4	0	0	0.676	0.887901	85.06	96.4	103.6	49	85.65	Not Found	Peak Found	High	Peak Found	High	High	High	High	Peak Found	High	1
FALSE	High	Master Protein	Q99447	Ethanolamine-phosphate cytidylyltransferase [OS=Homo sapiens]	0	14.467	11	3	46	3	389	43.8	6.92	91.95	3	0	0	0.744	0.954709	88.69	109.9	90.1	18.09	28.67	High	High	High	High	High	High	High	High	High	High	1
FALSE	High	Master Protein	O00560	Syntenin-1 [OS=Homo sapiens]	0	14.46	14	2	17	2	298	32.4	7.53	36.25	2	0	0	0.922	0.94575	77.87	117.6	82.4	59.06	53.28	Peak Found	High	High	High	High	High	High	High	High	High	1
TRUE	High	Master Protein	P61224	Ras-related protein Rap-1b [OS=Homo sapiens]	0	14.455	22	3	16	1	184	20.8	5.78	38.93	3	0	0	100	5.5167e-17			200			Not Found	Not Found	Not Found	Not Found	Not Found	Not Found	Not Found	High	Not Found	Not Found	1
FALSE	High	Master Protein	O75822	Eukaryotic translation initiation factor 3 subunit J [OS=Homo sapiens]	0	14.438	24	3	31	3	258	29	4.83	83.84	3	0	0	0.874	0.972772	49.15	134.2	65.8	44.94	48.27	Peak Found	High	High	High	High	Not Found	High	High	High	High	1
FALSE	High	Master Protein	Q06210	Glutamine--fructose-6-phosphate aminotransferase [isomerizing] 1 [OS=Homo sapiens]	0	14.426	9	4	23	4	699	78.8	7.11	34.8	4	0	0	0.246	0.234792	69.02	161.1	38.9	41.34	84.61	High	High	High	High	High	High	High	High	Peak Found	High	1
FALSE	High	Master Protein	Q9P0J0	NADH dehydrogenase [ubiquinone] 1 alpha subcomplex subunit 13 [OS=Homo sapiens]	0	14.359	35	4	21	4	144	16.7	8.43	28.15	4	0	0	1.08	0.806378	71.34	89.3	110.7	37.3	28.76	Not Found	High	High	High	High	High	High	High	High	High	1
TRUE	High	Master Protein	P57721	Poly(rC)-binding protein 3 [OS=Homo sapiens]	0	14.338	9	2	36	1	371	39.4	8.07	69.12	2	0	0	100	5.5167e-17			200			Not Found	Not Found	Not Found	Not Found	Not Found	Not Found	Not Found	High	Not Found	Not Found	1
FALSE	High	Master Protein	Q9NQH7	Xaa-Pro aminopeptidase 3 [OS=Homo sapiens]	0	14.338	12	3	9	2	507	57	6.83	22.78	3	0	0	1.435	0.757939	72.8	86.9	113.1	71.85	58.95	Not Found	High	High	Not Found	High	Peak Found	High	High	High	Not Found	1
FALSE	High	Master Protein	Q9UIQ6	Leucyl-cystinyl aminopeptidase [OS=Homo sapiens]	0	14.309	4	2	11	2	1025	117.3	5.73	41.56	2	0	0	0.816	0.97082	35.32	108.4	91.6	30.62	17.07	Not Found	High	High	High	High	High	High	High	High	High	1
TRUE	High	Master Protein	O75153	Clustered mitochondria protein homolog [OS=Homo sapiens]	0	14.297	5	3	4	3	1309	146.6	6.13	12.26	3	0	0	0.01	5.5167e-17		200		55.76		Not Found	Peak Found	High	Peak Found	High	Not Found	Not Found	High	Not Found	Not Found	1
FALSE	High	Master Protein	O00462	Beta-mannosidase [OS=Homo sapiens]	0	14.277	8	4	7	4	879	100.8	5.52	12.69	4	0	0	0.623	0.918299	46.93	107.4	92.6	24.1	95.29	Not Found	High	High	Not Found	Peak Found	Not Found	Peak Found	High	Not Found	High	1
FALSE	High	Master Protein	O15460	Prolyl 4-hydroxylase subunit alpha-2 [OS=Homo sapiens]	0	14.265	12	3	7	3	535	60.9	5.71	23.1	3	0	0	0.611	0.726517	110.56	117.8	82.2	83.03	59.23	Not Found	Peak Found	High	High	Peak Found	Peak Found	High	High	Peak Found	High	1
FALSE	High	Master Protein	O00487	26S proteasome non-ATPase regulatory subunit 14 [OS=Homo sapiens]	0	14.249	21	4	11	4	310	34.6	6.52	13.14	4	0	0	1.6	0.644059	121.06	66	134	106.37	79.53	Not Found	High	High	High	Peak Found	High	Peak Found	High	High	High	1
TRUE	High	Master Protein	Q969Z0	FAST kinase domain-containing protein 4 [OS=Homo sapiens]	0	14.227	6	2	8	2	631	70.7	7.42	23.2	2	0	0	0.461	0.104106	133.27	160.6	39.4	53.21	58.12	Not Found	High	High	Peak Found	Peak Found	Peak Found	Peak Found	High	Peak Found	High	1
FALSE	High	Master Protein	Q9UPU5	Ubiquitin carboxyl-terminal hydrolase 24 [OS=Homo sapiens]	0	14.223	3	4	20	4	2620	294.2	6.14	56.25	4	0	0	0.609	0.913768	91.34	111	89	35.3	49.03	Peak Found	High	High	High	High	High	High	High	High	High	1
TRUE	High	Master Protein	Q7Z7H5	Transmembrane emp24 domain-containing protein 4 [OS=Homo sapiens]	0	14.21	19	3	6	1	227	25.9	8.28	14.95	3	0	0	100	5.5167e-17			200			Not Found	Not Found	Not Found	Not Found	Not Found	Not Found	Not Found	High	Not Found	Not Found	1
FALSE	High	Master Protein	Q9Y3D3	28S ribosomal protein S16, mitochondrial [OS=Homo sapiens]	0	14.191	28	2	18	2	137	15.3	9.5	50.18	2	0	0	0.627	0.704469	94.37	145.1	54.9	34.24	40.88	Peak Found	High	High	High	High	Peak Found	High	High	High	High	1
FALSE	High	Master Protein	Q86W92	Liprin-beta-1 [OS=Homo sapiens]	0	14.133	5	3	5	3	1011	114	5.55	11.91	3	0	0	0.692	0.966267	101.09	81.4	118.6	35.51	61.2	Peak Found	Peak Found	High	High	High	Not Found	Peak Found	High	Peak Found	High	1
FALSE	High	Master Protein	Q9UL25	Ras-related protein Rab-21 [OS=Homo sapiens]	0	14.128	20	3	15	3	225	24.3	7.94	29.74	3	0	0	0.915	0.950575	67.96	101.1	98.9	71.68	40.37	High	High	High	High	Peak Found	High	High	High	High	High	1
FALSE	High	Master Protein	Q5T653	39S ribosomal protein L2, mitochondrial [OS=Homo sapiens]	0	14.122	15	2	6	2	305	33.3	11.3	23.83	2	0	0	1.228	0.722924	8.85	131.9	68.1	103.78		Not Found	High	High	High	Not Found	Not Found	High	Not Found	High	Not Found	1
FALSE	High	Master Protein	O00471	Exocyst complex component 5 [OS=Homo sapiens]	0	14.074	6	2	12	2	708	81.8	6.71	27.03	2	0	0	1.466	0.738216	53.61	62.4	137.6	84.6	41.54	Not Found	High	High	High	High	High	Not Found	High	Not Found	High	1
FALSE	High	Master Protein	Q9H3K2	Growth hormone-inducible transmembrane protein [OS=Homo sapiens]	0	14.061	6	1	13	1	345	37.2	9.94	31.22	1	0	0	1.003	0.894987	100.89	21	179	109.32	192.54	High	High	High	High	High	Peak Found	High	High	High	High	1
FALSE	High	Master Protein	Q14318	Peptidyl-prolyl cis-trans isomerase FKBP8 [OS=Homo sapiens]	0	14.057	8	2	46	2	412	44.5	4.84	126.69	2	0	0	1.043	0.865826	115.93	84.2	115.8	55.51	64.65	High	High	High	High	High	High	High	High	High	High	1
FALSE	High	Master Protein	Q9UNH7	Sorting nexin-6 [OS=Homo sapiens]	0	14.002	16	4	10	4	406	46.6	6.16	27.7	4	0	0	0.868	0.980195	59.12	56.6	143.4	68.94	44.99	Not Found	Peak Found	High	Peak Found	High	High	High	Peak Found	Peak Found	High	1
FALSE	High	Master Protein	P48729	Casein kinase I isoform alpha [OS=Homo sapiens]	0	14.001	14	3	19	3	337	38.9	9.57	27.43	3	0	0	0.373	0.472945	76.01	62.9	137.1	126.65	123.91	Peak Found	High	High	Peak Found	High	Peak Found	High	High	High	High	1
FALSE	High	Master Protein	Q9H0N5	Pterin-4-alpha-carbinolamine dehydratase 2 [OS=Homo sapiens]	0	13.978	24	2	31	2	130	14.4	9.11	69.73	2	0	0	0.477	0.452571	80.19	137.8	62.2	61.75	35.25	Not Found	High	High	Peak Found	High	High	High	High	High	High	1
FALSE	High	Master Protein	Q01974	Tyrosine-protein kinase transmembrane receptor ROR2 [OS=Homo sapiens]	0	13.97	8	4	5	4	943	104.7	6.55	9.39	4	0	0	0.435	0.724516	96.18	168.8	31.2	39.1	83.57	Not Found	Peak Found	High	High	Not Found	High	Not Found	High	Not Found	Peak Found	1
FALSE	High	Master Protein	Q9H9P8	L-2-hydroxyglutarate dehydrogenase, mitochondrial [OS=Homo sapiens]	0	13.929	5	1	8	1	463	50.3	8.15	27.75	1	0	0	0.575	0.831092	84.9	127.6	72.4	79.64	85.96	High	Not Found	High	Peak Found	High	High	High	Peak Found	High	Not Found	1
FALSE	High	Master Protein	P61081	NEDD8-conjugating enzyme Ubc12 [OS=Homo sapiens]	0	13.887	21	3	11	3	183	20.9	7.69	42.63	3	0	0	0.646	0.651108	107.51	104.4	95.6	61.77	65.89	Not Found	High	High	High	High	High	High	High	Peak Found	High	1
TRUE	High	Master Protein	O00170	AH receptor-interacting protein [OS=Homo sapiens]	0	13.886	11	2	18	2	330	37.6	6.42	36.66	2	0	0	0.484	0.0615098	68.83	141.3	58.7	72.68	41.09	High	High	High	High	High	High	High	High	High	High	1
FALSE	High	Master Protein	Q5VWP3	Muscular LMNA-interacting protein [OS=Homo sapiens]	0	13.855	11	3	18	3	458	50.4	6.38	33.79	3	0	0	0.849	0.98526	83.36	87.8	112.2	62.89	67.92	Peak Found	High	Peak Found	High	High	Peak Found	High	High	High	Peak Found	1
TRUE	High	Master Protein	O60343	TBC1 domain family member 4 [OS=Homo sapiens]	0	13.848	4	3	4	3	1298	146.5	7.01	13.71	3	0	0	0.091	2.25665e-05	89.64	182.1	17.9	40.95	83.53	Not Found	Not Found	High	High	Peak Found	Not Found	Peak Found	High	Peak Found	High	1
FALSE	High	Master Protein	Q7Z2K6	Endoplasmic reticulum metallopeptidase 1 [OS=Homo sapiens]	0	13.846	6	3	5	3	904	100.2	7.52	11.36	3	0	0	2.649	0.339146	140.45	49.1	150.9	71.4	72.73	Not Found	High	High	Peak Found	Peak Found	Peak Found	High	High	Peak Found	Not Found	1
FALSE	High	Master Protein	O95376	E3 ubiquitin-protein ligase ARIH2 [OS=Homo sapiens]	0	13.795	11	3	19	3	493	57.8	5.63	41.75	3	0	0	0.699	0.957271	124.32	127.7	72.3	83.05	79.23	Peak Found	High	High	High	High	Peak Found	High	High	High	High	1
FALSE	High	Master Protein	Q06787	Fragile X messenger ribonucleoprotein 1 [OS=Homo sapiens]	0	13.784	8	3	11	3	632	71.1	7.42	28.25	3	0	0	0.936	0.9378	109.01	100.1	99.9	63.88	17.39	Peak Found	High	Peak Found	Peak Found	High	Not Found	Peak Found	High	High	High	1
FALSE	High	Master Protein	Q9H0V9	VIP36-like protein [OS=Homo sapiens]	0	13.728	13	3	33	3	348	39.7	8.38	76.9	3	0	0	0.746	0.887541	104.4	94.8	105.2	67.94	47.25	Peak Found	High	High	High	High	Not Found	High	High	High	High	1
FALSE	High	Master Protein	Q9UJ70	N-acetyl-D-glucosamine kinase [OS=Homo sapiens]	0	13.721	11	3	30	3	344	37.4	6.24	75.3	3	0	0	0.802	0.932767	88.55	122.6	77.4	45.18	39.89	Peak Found	High	High	High	High	Not Found	High	High	High	High	1
FALSE	High	Master Protein	Q9NXJ5	Pyroglutamyl-peptidase 1 [OS=Homo sapiens]	0	13.659	19	2	8	2	209	23.1	5.9	26.94	2	0	0	0.443	0.619116	89.46	130.8	69.2	96	76.92	Not Found	Not Found	High	Not Found	High	High	Peak Found	High	High	High	1
FALSE	High	Master Protein	P49589	Cysteine--tRNA ligase, cytoplasmic [OS=Homo sapiens]	0	13.656	5	2	3	2	748	85.4	6.76	10.94	2	0	0	0.489	0.704469	107.81	115.7	84.3	84.01	77.77	High	Peak Found	High	Peak Found	Peak Found	Peak Found	Not Found	Not Found	Peak Found	Peak Found	1
FALSE	High	Master Protein	Q99536	Synaptic vesicle membrane protein VAT-1 homolog [OS=Homo sapiens]	0	13.579	11	3	5	3	393	41.9	6.29	10.42	3	0	0	1.238	0.892381	298.56	44.5	155.5	114.38	138.86	Not Found	Peak Found	Not Found	High	Not Found	Not Found	Not Found	High	Not Found	Peak Found	1
FALSE	High	Master Protein	O94760	N(G),N(G)-dimethylarginine dimethylaminohydrolase 1 [OS=Homo sapiens]	0	13.575	22	4	6	3	285	31.1	5.81	10.41	4	0	1	1.721	0.480668	124.06	85.7	114.3	103.97	67.53	Not Found	Peak Found	Peak Found	Peak Found	Peak Found	Not Found	Peak Found	High	High	High	1
FALSE	High	Master Protein	Q13618	Cullin-3 [OS=Homo sapiens]	0	13.57	5	3	15	3	768	88.9	8.48	32.01	3	0	0	0.718	0.955513	100.19	129.6	70.4	40.28	163.8	Not Found	High	High	Peak Found	High	Peak Found	High	High	High	High	1
TRUE	High	Master Protein	Q9UK22	F-box only protein 2 [OS=Homo sapiens]	0	13.562	19	2	2	2	296	33.3	4.37	7.71	2	0	0	16.059	0.00205245	9.12	11.7	188.3	8.69		Not Found	Peak Found	Not Found	Peak Found	Not Found	Not Found	Not Found	High	Not Found	High	1
TRUE	High	Master Protein	Q16775	Hydroxyacylglutathione hydrolase, mitochondrial [OS=Homo sapiens]	0	13.555	14	3	9	3	308	33.8	8.12	26.15	3	0	0	0.316	0.0535232	76.35	125.1	74.9	79	55.35	Not Found	High	High	Peak Found	High	Not Found	High	High	Not Found	Peak Found	1
FALSE	High	Master Protein	P46781	40S ribosomal protein S9 [OS=Homo sapiens]	0	13.545	23	5	13	5	194	22.6	10.65	19.66	5	0	0	2.498	0.211121	140.96	55.9	144.1	93.08	110.73	Peak Found	High	Peak Found	High	Not Found	Peak Found	High	High	High	High	1
FALSE	High	Master Protein	Q15042	Rab3 GTPase-activating protein catalytic subunit [OS=Homo sapiens]	0	13.497	3	2	9	2	981	110.5	5.55	28.62	2	0	0	0.637	0.921271	67.69	126.4	73.6	60.09	72.02	Not Found	Peak Found	High	High	High	Not Found	High	High	Peak Found	High	1
TRUE	High	Master Protein	P69905	Hemoglobin subunit alpha [OS=Homo sapiens]	0	13.473	26	3	11	3	142	15.2	8.68	23.21	3	0	0	5.507	0.00188936	555.22	58.8	141.2	75.66	127.82	Not Found	High	High	High	Peak Found	Not Found	Peak Found	High	Not Found	Not Found	1
FALSE	High	Master Protein	P23381	Tryptophan--tRNA ligase, cytoplasmic [OS=Homo sapiens]	0	13.467	16	3	14	3	471	53.1	6.23	32.73	3	0	0	1.767	0.31661	52.09	76.4	123.6	41.02	63.25	Not Found	High	Peak Found	High	Peak Found	Not Found	High	Peak Found	High	High	1
FALSE	High	Master Protein	P50914	60S ribosomal protein L14 [OS=Homo sapiens]	0	13.453	10	2	66	2	215	23.4	10.93	110.63	2	0	0	0.811	0.966267	126.14	121.9	78.1	90.26	122.48	Peak Found	High	High	High	High	Peak Found	High	High	High	High	1
FALSE	High	Master Protein	Q9Y6W5	Actin-binding protein WASF2 [OS=Homo sapiens]	0	13.449	8	3	8	3	498	54.3	5.53	20.25	3	0	0	1.234	0.760054	48.82	69.6	130.4	92.89	40.32	Not Found	Peak Found	High	High	Not Found	High	Peak Found	High	High	Peak Found	1
FALSE	High	Master Protein	P15104	Glutamine synthetase [OS=Homo sapiens]	0	13.445	16	3	10	3	373	42	6.89	20.08	3	0	0	0.877	0.973454	84.47	128.8	71.2	89.2	79.21	Not Found	High	High	Not Found	High	Not Found	High	High	High	High	1
FALSE	High	Master Protein	P62263	40S ribosomal protein S14 [OS=Homo sapiens]	0	13.435	14	1	14	1	151	16.3	10.05	36.37	1	0	0	1.531	0.524715	105.12	67.7	132.3	67.63	113.47	Not Found	High	Peak Found	High	Not Found	Not Found	High	High	Not Found	Not Found	1
FALSE	High	Master Protein	Q13492	Phosphatidylinositol-binding clathrin assembly protein [OS=Homo sapiens]	0	13.433	8	2	3	2	652	70.7	7.9	10.69	2	0	0	0.368	0.550524	112.2	146.1	53.9	67.17	110.28	Not Found	Peak Found	High	Peak Found	Peak Found	Not Found	Peak Found	Peak Found	Peak Found	Not Found	1
FALSE	High	Master Protein	Q9BXX0	EMILIN-2 [OS=Homo sapiens]	0	13.414	6	3	26	3	1053	115.6	6.46	48.74	3	0	0	1.029	0.887901	80.04	91	109	41.74	24.01	Not Found	High	High	Peak Found	High	High	High	High	High	High	1
FALSE	High	Master Protein	Q05048	Cleavage stimulation factor subunit 1 [OS=Homo sapiens]	0	13.396	9	2	7	2	431	48.3	6.58	16.95	2	0	0	0.464	0.551792	55.34	129.3	70.7	53.48	7.15	Not Found	High	Peak Found	Peak Found	Peak Found	Not Found	Peak Found	High	Not Found	High	1
TRUE	High	Master Protein	O75179	Ankyrin repeat domain-containing protein 17 [OS=Homo sapiens]	0	13.383	2	3	3	3	2603	274.1	6.52	5.16	3	0	0	0.053	0.00199044	93.11	92.7	107.3	85.35		Peak Found	High	High	Peak Found	Not Found	Not Found	Not Found	High	Not Found	Not Found	1
FALSE	High	Master Protein	P25205	DNA replication licensing factor MCM3 [OS=Homo sapiens]	0	13.37	8	5	14	5	808	90.9	5.77	19.07	5	0	0	0.859	0.957273	92.11	167.6	32.4	140.96	120.21	Not Found	Peak Found	High	High	High	Peak Found	Peak Found	High	High	High	1
FALSE	High	Master Protein	P20700	Lamin-B1 [OS=Homo sapiens]	0	13.368	10	4	8	4	586	66.4	5.16	14.27	4	0	0	1.419	0.726517	133.8	75.6	124.4	182.29	145.96	Peak Found	Peak Found	Peak Found	Peak Found	Peak Found	Not Found	High	High	Peak Found	High	1
TRUE	High	Master Protein	P51688	N-sulphoglucosamine sulphohydrolase [OS=Homo sapiens]	0	13.367	10	2	9	2	502	56.7	6.95	26.6	2	0	0	4.169	0.114886	0	38.7	161.3			Not Found	Not Found	High	Not Found	High	High	High	High	High	High	1
FALSE	High	Master Protein	Q8NCW5	NAD(P)H-hydrate epimerase [OS=Homo sapiens]	0	13.358	14	3	15	3	288	31.7	7.66	38.3	3	0	0	2.274	0.47373	142.72	181.9	18.1	92.02	138.43	High	High	Peak Found	High	Peak Found	Not Found	High	High	Peak Found	Not Found	1
FALSE	High	Master Protein	Q96CX2	BTB/POZ domain-containing protein KCTD12 [OS=Homo sapiens]	0	13.354	19	3	9	3	325	35.7	5.64	14.91	3	0	0	0.793	0.957273	40.62	113	87	52.48	99.99	Peak Found	Not Found	High	High	Not Found	Not Found	Peak Found	High	High	High	1
TRUE	High	Master Protein	P23434	Glycine cleavage system H protein, mitochondrial [OS=Homo sapiens]	0	13.347	12	1	3	1	173	18.9	4.88	9.48	1	0	0	100	5.5167e-17			200		108.62	Not Found	Not Found	Not Found	Not Found	Not Found	High	Peak Found	High	High	Not Found	1
FALSE	High	Master Protein	P49959	Double-strand break repair protein MRE11 [OS=Homo sapiens]	0	13.324	7	3	12	3	708	80.5	5.9	30.77	3	0	0	0.583	0.818934	105.29	103.5	96.5	84.47	56.94	Not Found	Peak Found	High	High	High	High	High	High	High	Peak Found	1
TRUE	High	Master Protein	Q9BSH5	Haloacid dehalogenase-like hydrolase domain-containing protein 3 [OS=Homo sapiens]	0	13.317	22	3	12	3	251	28	6.71	38.1	3	0	0	7.23	0.000311124	145.46	18	182	134.28	129.17	Not Found	Peak Found	Not Found	High	Peak Found	Not Found	High	High	High	High	1
FALSE	High	Master Protein	P62829	60S ribosomal protein L23 [OS=Homo sapiens]	0	13.282	44	4	6	4	140	14.9	10.51	15.4	4	0	0	1.5	0.487396	133.62	85.9	114.1	78.55	79.13	Not Found	Peak Found	Peak Found	Peak Found	Peak Found	Peak Found	High	High	Peak Found	Peak Found	1
FALSE	High	Master Protein	Q13564	NEDD8-activating enzyme E1 regulatory subunit [OS=Homo sapiens]	0	13.271	8	3	7	3	534	60.2	5.4	14.39	3	0	0	0.503	0.74681	91.3	81.6	118.4	113.95	46.04	Peak Found	Peak Found	Peak Found	Peak Found	High	Not Found	High	High	High	High	1
FALSE	High	Master Protein	Q92783	Signal transducing adapter molecule 1 [OS=Homo sapiens]	0	13.254	8	2	16	2	540	59.1	4.82	43.82	2	0	0	0.582	0.82957	54.38	129.6	70.4	22.29	54.19	High	High	High	Peak Found	High	High	High	High	Not Found	High	1
FALSE	High	Master Protein	Q9NTG7	NAD-dependent protein deacetylase sirtuin-3, mitochondrial [OS=Homo sapiens]	0	13.249	12	2	28	2	399	43.5	8.7	63.07	2	0	0	0.596	0.813616	114.32	158.6	41.4	74.36	129.71	High	High	High	High	High	High	High	High	High	High	1
FALSE	High	Master Protein	Q96FJ2	Dynein light chain 2, cytoplasmic [OS=Homo sapiens]	0	13.243	38	2	22	1	89	10.3	7.37	50.73	2	0	0	2.098	0.367942	126.34	84.1	115.9	157.26	67.1	High	High	High	High	Peak Found	High	High	High	High	Not Found	1
FALSE	High	Master Protein	O00425	Insulin-like growth factor 2 mRNA-binding protein 3 [OS=Homo sapiens]	0	13.23	7	3	12	3	579	63.7	8.87	26.47	3	0	0	0.324	0.492541	131.8	63.6	136.4	9.49	78.52	Not Found	Peak Found	High	Not Found	Not Found	Not Found	High	High	High	Peak Found	1
FALSE	High	Master Protein	P62760	Visinin-like protein 1 [OS=Homo sapiens]	0	13.191	20	3	18	3	191	22.1	5.15	47.27	3	0	0	0.742	0.924788	103.77	86.5	113.5	75.24	87.49	High	High	High	High	Peak Found	Peak Found	High	High	High	Peak Found	1
FALSE	High	Master Protein	Q9UI10	Translation initiation factor eIF-2B subunit delta [OS=Homo sapiens]	0	13.179	12	3	6	3	523	57.5	9.38	16.05	3	0	0	0.749	0.995521	19.27	51.4	148.6		53.23	Not Found	High	High	Not Found	Not Found	Not Found	High	High	High	Peak Found	1
FALSE	High	Master Protein	P53992	Protein transport protein Sec24C [OS=Homo sapiens]	0	13.179	6	3	6	3	1094	118.2	7.06	14.45	3	0	0	0.63	0.919844	123.18	94.9	105.1	69.72	79.94	Peak Found	Peak Found	Peak Found	Peak Found	High	Peak Found	Peak Found	High	Not Found	High	1
TRUE	High	Master Protein	P46459	Vesicle-fusing ATPase [OS=Homo sapiens]	0	13.128	8	4	9	4	744	82.5	6.95	13.41	4	0	0	5.108	0.0495416	121.36	25.8	174.2	106.64	84.95	Peak Found	High	Not Found	Peak Found	High	High	Not Found	High	Peak Found	High	1
TRUE	High	Master Protein	P09455	Retinol-binding protein 1 [OS=Homo sapiens]	0	13.127	21	2	12	2	135	15.8	5.11	35.35	2	0	0	0.435	0.0252238	66.84	144.5	55.5	52.35	32.15	Not Found	Peak Found	High	High	High	High	Peak Found	High	High	High	1
FALSE	High	Master Protein	P34059	N-acetylgalactosamine-6-sulfatase [OS=Homo sapiens]	0	13.112	8	2	4	2	522	58	6.74	13.35	2	0	0	0.598	0.792188	87.54	125.7	74.3	75.95	48.49	Peak Found	Peak Found	Peak Found	High	Not Found	Peak Found	Peak Found	Peak Found	High	High	1
FALSE	High	Master Protein	Q9Y2Z0	Protein SGT1 homolog [OS=Homo sapiens]	0	13.105	11	2	15	2	365	41	5.16	40.17	2	0	0	0.407	0.198327	108.69	160.2	39.8	57.47	42.73	Not Found	High	High	High	High	Not Found	High	High	High	High	1
FALSE	High	Master Protein	P61020	Ras-related protein Rab-5B [OS=Homo sapiens]	0	13.102	15	2	10	2	215	23.7	8.13	29.24	2	0	0	0.714	0.921271	100.53	109.1	90.9	59.29	83.55	High	High	Peak Found	High	Peak Found	High	Peak Found	High	High	Peak Found	1
FALSE	High	Master Protein	Q16539	Mitogen-activated protein kinase 14 [OS=Homo sapiens]	0	13.098	12	2	12	2	360	41.3	5.78	36.03	2	0	0	1.635	0.386003	132.67	53.1	146.9	104.78	88.53	High	High	High	High	High	High	Peak Found	High	High	Peak Found	1
FALSE	High	Master Protein	Q8TB37	Iron-sulfur protein NUBPL [OS=Homo sapiens]	0	13.056	12	2	9	2	319	34.1	9.04	26.03	2	0	0	1.054	0.846663	75.34	89.3	110.7	61.61	22.37	Peak Found	Peak Found	High	Not Found	High	High	High	High	Peak Found	High	1
FALSE	High	Master Protein	Q9BZE1	39S ribosomal protein L37, mitochondrial [OS=Homo sapiens]	0	13.024	9	2	10	2	423	48.1	8.59	27.15	2	0	0	1.022	0.884129	108.24	125.1	74.9	98.29	78.37	Not Found	High	High	High	Not Found	Not Found	Peak Found	High	High	High	1
FALSE	High	Master Protein	P10301	Ras-related protein R-Ras [OS=Homo sapiens]	0	13.023	22	3	12	3	218	23.5	6.93	34.88	3	0	0	0.896	0.955513	37.31	95.5	104.5	38.63	12.38	Not Found	High	High	High	High	Not Found	High	High	High	High	1
FALSE	High	Master Protein	P61086	Ubiquitin-conjugating enzyme E2 K [OS=Homo sapiens]	0	13.011	23	2	28	2	200	22.4	5.44	97.04	2	0	0	0.873	0.988599	112.1	136.5	63.5	65.65	94.63	High	High	High	High	High	High	High	High	High	High	1
FALSE	High	Master Protein	Q02878	60S ribosomal protein L6 [OS=Homo sapiens]	0	12.999	13	3	16	3	288	32.7	10.58	29.61	3	0	0	1.908	0.213515	66.81	60.5	139.5	70.67	92.79	Not Found	High	Peak Found	Peak Found	Peak Found	High	High	High	High	Peak Found	1
TRUE	High	Master Protein	Q86UE4	Protein LYRIC [OS=Homo sapiens]	0	12.994	9	2	12	2	582	63.8	9.32	35.33	2	0	0	2.42	0.110127	107.18	46.1	153.9	75.45	76.02	Not Found	High	High	High	Peak Found	High	Peak Found	High	High	Not Found	1
FALSE	High	Master Protein	Q9UBT2	SUMO-activating enzyme subunit 2 [OS=Homo sapiens]	0	12.988	13	3	6	3	640	71.2	5.29	18.13	3	0	0	1.374	0.698114	120.15	113.2	86.8	50.91	91.3	Not Found	High	Not Found	High	Not Found	Peak Found	Not Found	Peak Found	High	High	1
FALSE	High	Master Protein	P28838	Cytosol aminopeptidase [OS=Homo sapiens]	0	12.972	7	3	27	3	519	56.1	7.93	60.03	3	0	0	1.017	0.910947	86.18	90.1	109.9	21.96	62.84	Not Found	High	High	High	High	High	High	High	High	High	1
FALSE	High	Master Protein	Q6PGP7	Tetratricopeptide repeat protein 37 [OS=Homo sapiens]	0	12.969	2	3	8	3	1564	175.4	7.53	21.21	3	0	0	1.312	0.813512	26.86	80.5	119.5	25.21	17.39	Not Found	Peak Found	Not Found	High	Not Found	Not Found	Not Found	High	Not Found	High	1
FALSE	High	Master Protein	P02649	Apolipoprotein E [OS=Homo sapiens]	0	12.936	9	2	4	2	317	36.1	5.73	6.78	2	0	0	0.66	0.945362	119.96	61.3	138.7	72.17	82.77	High	Peak Found	Not Found	Not Found	Peak Found	High	Not Found	High	Not Found	High	1
TRUE	High	Master Protein	Q15404	Ras suppressor protein 1 [OS=Homo sapiens]	0	12.921	23	3	3	3	277	31.5	8.65	7.69	3	0	0	71.769	5.5167e-17	0	167.4	32.6			Not Found	Not Found	Not Found	Not Found	High	Not Found	Not Found	High	Not Found	Not Found	1
FALSE	High	Master Protein	O00754	Lysosomal alpha-mannosidase [OS=Homo sapiens]	0	12.906	3	2	8	2	1011	113.7	7.28	23.23	2	0	0	0.769	0.999121	55.63	102.5	97.5	37.47	48.16	Peak Found	High	Peak Found	High	High	Peak Found	Peak Found	High	Peak Found	High	1
FALSE	High	Master Protein	O75844	CAAX prenyl protease 1 homolog [OS=Homo sapiens]	0	12.901	13	3	6	3	475	54.8	7.49	14.48	3	0	0	1.337	0.76647	106.67	55.5	144.5	164.9	53.68	High	Peak Found	High	Peak Found	High	Peak Found	High	Peak Found	High	Peak Found	1
FALSE	High	Master Protein	Q9BU61	NADH dehydrogenase [ubiquinone] 1 alpha subcomplex assembly factor 3 [OS=Homo sapiens]	0	12.887	19	2	28	2	184	20.3	8.22	102.51	2	0	0	0.679	0.825043	99.08	126.6	73.4	58.14	86.2	Not Found	High	High	High	High	High	High	High	High	High	1
FALSE	High	Master Protein	P10619	Lysosomal protective protein [OS=Homo sapiens]	0	12.88	7	2	10	2	480	54.4	6.61	19.81	2	0	0	0.459	0.713899	52.47	137.1	62.9		65.15	Not Found	Not Found	Not Found	Not Found	High	Not Found	Peak Found	High	High	High	1
FALSE	High	Master Protein	O95159	Zinc finger protein-like 1 [OS=Homo sapiens]	0	12.879	11	2	14	2	310	34.1	8.07	27.93	2	0	0	1.458	0.540508	59.88	69.6	130.4	60.14	39.47	Not Found	High	High	High	High	Not Found	High	High	High	High	1
FALSE	High	Master Protein	P60033	CD81 antigen [OS=Homo sapiens]	0	12.878	18	2	14	2	236	25.8	5.29	43.01	2	0	0	0.742	0.710771	103.04	122.8	77.2	87.98	43.36	Not Found	Peak Found	High	High	High	High	High	High	High	High	1
FALSE	High	Master Protein	O75955	Flotillin-1 [OS=Homo sapiens]	0	12.869	9	3	10	3	427	47.3	7.49	22.49	3	0	0	1.593	0.754724	91.91	102.5	97.5	56.34	144.27	Peak Found	Peak Found	High	High	Peak Found	High	High	High	High	Peak Found	1
FALSE	High	Master Protein	P08729	Keratin, type II cytoskeletal 7 [OS=Homo sapiens]	0	12.832	6	3	234	1	469	51.4	5.48	668.77	3	0	0	0.505	0.665492	0	132.9	67.1			Not Found	Not Found	High	Not Found	Not Found	Not Found	Peak Found	Not Found	Not Found	Not Found	1
FALSE	High	Master Protein	O75122	CLIP-associating protein 2 [OS=Homo sapiens]	0	12.83	4	3	6	2	1294	141	8.4	17.9	3	0	0	0.495	0.793066	51.04	126.3	73.7		65.64	Not Found	Not Found	Not Found	Not Found	High	Not Found	Not Found	High	Not Found	High	1
TRUE	High	Master Protein	O60925	Prefoldin subunit 1 [OS=Homo sapiens]	0	12.818	29	2	2	2	122	14.2	6.81	6.09	2	0	0	100	5.5167e-17			200		76.67	Not Found	Not Found	Not Found	Not Found	Not Found	High	Peak Found	High	Not Found	Not Found	1
FALSE	High	Master Protein	P78344	Eukaryotic translation initiation factor 4 gamma 2 [OS=Homo sapiens]	0	12.795	5	4	11	4	907	102.3	7.14	19.09	4	0	0	2.309	0.306865	145.23	48.3	151.7	88.78	113.01	Not Found	Peak Found	Not Found	High	High	Not Found	Peak Found	High	Not Found	High	1
FALSE	High	Master Protein	P49459	Ubiquitin-conjugating enzyme E2 A [OS=Homo sapiens]	0	12.774	24	2	39	1	152	17.3	5.15	90.46	2	0	1	1.308	0.58629	72.53	118.3	81.7	81.51	112.59	Not Found	High	High	High	High	High	High	High	High	High	1
FALSE	High	Master Protein	O75351	Vacuolar protein sorting-associated protein 4B [OS=Homo sapiens]	0	12.768	8	2	6	2	444	49.3	7.23	18.31	2	0	0	1.382	0.706393	22.13	91.6	108.4	5.09	28.16	Not Found	Not Found	Not Found	Peak Found	High	Not Found	High	High	Not Found	High	1
FALSE	High	Master Protein	P62917	60S ribosomal protein L8 [OS=Homo sapiens]	0	12.752	8	2	21	2	257	28	11.03	56.21	2	0	0	0.968	0.932767	120.91	106.9	93.1	42.9	85.33	Not Found	High	High	High	High	Not Found	High	Peak Found	High	High	1
FALSE	High	Master Protein	Q96C36	Pyrroline-5-carboxylate reductase 2 [OS=Homo sapiens]	0	12.741	17	3	11	2	320	33.6	7.77	22.75	3	0	1	1.012	0.891334	119.27	43.6	156.4	67.24	11.44	Peak Found	Peak Found	High	Not Found	Peak Found	Peak Found	High	Peak Found	Peak Found	High	1
FALSE	High	Master Protein	Q8WZA0	Protein LZIC [OS=Homo sapiens]	0	12.736	23	4	27	4	190	21.5	4.94	61.87	4	0	0	1.067	0.840092	106.19	93.2	106.8	68.02	70.74	Peak Found	High	High	High	High	Peak Found	High	High	High	High	1
FALSE	High	Master Protein	Q6IBS0	Twinfilin-2 [OS=Homo sapiens]	0	12.724	15	3	8	3	349	39.5	6.84	23.43	3	0	0	0.373	0.55494	107.92	106.8	93.2	61.73	94.95	Not Found	Peak Found	Peak Found	High	High	Not Found	Peak Found	High	Peak Found	High	1
FALSE	High	Master Protein	Q99541	Perilipin-2 [OS=Homo sapiens]	0	12.651	14	3	6	3	437	48	6.8	13.41	3	0	0	1.404	0.695423	127.54	94.2	105.8	107.32	100.5	High	Peak Found	Peak Found	High	Not Found	Not Found	High	High	Not Found	High	1
FALSE	High	Master Protein	P04626	Receptor tyrosine-protein kinase erbB-2 [OS=Homo sapiens]	0	12.649	5	3	8	3	1255	137.8	5.91	24.22	3	0	0	0.506	0.792188	132.64	157.3	42.7	111.28	163.7	Not Found	Peak Found	High	High	High	Peak Found	High	High	Peak Found	High	1
FALSE	High	Master Protein	P55145	Mesencephalic astrocyte-derived neurotrophic factor [OS=Homo sapiens]	0	12.622	23	4	14	4	182	20.7	8.69	35.64	4	0	0	0.746	0.943089	137.05	130.9	69.1	96.56	91.2	Not Found	High	High	High	Peak Found	Peak Found	Not Found	High	Peak Found	High	1
TRUE	High	Master Protein	Q9Y4Y9	U6 snRNA-associated Sm-like protein LSm5 [OS=Homo sapiens]	0	12.581	58	2	6	2	91	9.9	4.54	22.97	2	0	0	100	5.5167e-17			200			High	Not Found	Not Found	Not Found	High	Not Found	High	Not Found	High	High	1
FALSE	High	Master Protein	P53396	ATP-citrate synthase [OS=Homo sapiens]	0	12.563	5	3	11	3	1101	120.8	7.33	28.65	3	0	0	0.539	0.694421	41.75	127.8	72.2	25.25	59.1	Not Found	High	High	Peak Found	High	Not Found	High	High	High	High	1
TRUE	High	Master Protein	Q9BTV4	Transmembrane protein 43 [OS=Homo sapiens]	0	12.556	12	2	6	2	400	44.8	8.13	16.97	2	0	0	0.446	0.119577	101.29	151.1	48.9	31.72	66.27	Not Found	Peak Found	Peak Found	High	Peak Found	Peak Found	High	High	High	Peak Found	1
FALSE	High	Master Protein	Q9GZT3	SRA stem-loop-interacting RNA-binding protein, mitochondrial [OS=Homo sapiens]	0	12.517	26	2	46	2	109	12.3	10.24	121.89	2	0	0	0.78	0.937916	88.76	93	107	39.07	58.56	Not Found	High	High	High	High	Not Found	High	High	High	High	1
TRUE	High	Master Protein	Q9UNZ2	NSFL1 cofactor p47 [OS=Homo sapiens]	0	12.484	15	3	7	3	370	40.5	5.1	16.75	3	0	0	2.903	0.142611	84.66	63.4	136.6	65.77	120.7	Peak Found	High	Peak Found	Peak Found	Peak Found	High	Not Found	High	Not Found	Peak Found	1
FALSE	High	Master Protein	O43741	5'-AMP-activated protein kinase subunit beta-2 [OS=Homo sapiens]	0	12.447	11	2	21	2	272	30.3	6.46	40.7	2	0	0	0.933	0.966267	64.03	97.5	102.5	24.73	36.56	High	High	High	High	High	High	High	High	High	High	1
FALSE	High	Master Protein	Q8NFZ8	Cell adhesion molecule 4 [OS=Homo sapiens]	0	12.434	14	3	8	3	388	42.8	6.3	14.24	3	0	0	1.151	0.914547	142.47	92.4	107.6	125.09	124.22	High	High	Not Found	Peak Found	Peak Found	High	Not Found	High	Peak Found	Peak Found	1
FALSE	High	Master Protein	P37840	Alpha-synuclein [OS=Homo sapiens]	0	12.424	26	2	18	2	140	14.5	4.7	57.37	2	0	0	0.654	0.871261	121.31	95.5	104.5	84.4	91.57	Not Found	High	High	High	High	High	High	High	High	Not Found	1
FALSE	High	Master Protein	P11498	Pyruvate carboxylase, mitochondrial [OS=Homo sapiens]	0	12.41	3	2	5	2	1178	129.6	6.84	12.33	2	0	0	0.736	0.966342	71.63	165.4	34.6	80.11	63.95	Not Found	Peak Found	High	Not Found	High	Not Found	High	High	Not Found	High	1
FALSE	High	Master Protein	Q9NZL9	Methionine adenosyltransferase 2 subunit beta [OS=Homo sapiens]	0	12.385	11	2	18	2	334	37.5	7.36	54.99	2	0	0	2.595	0.243667	132.94	86.9	113.1	96.51	116.74	Not Found	High	High	Peak Found	Peak Found	Not Found	High	High	High	Not Found	1
FALSE	High	Master Protein	O00339	Matrilin-2 [OS=Homo sapiens]	0	12.357	4	2	20	2	956	106.8	6.27	56.82	2	0	0	0.436	0.482714	89.79	141.4	58.6	19.35	34.97	Not Found	High	High	High	High	Not Found	High	Peak Found	Peak Found	High	1
FALSE	High	Master Protein	P63146	Ubiquitin-conjugating enzyme E2 B [OS=Homo sapiens]	0	12.356	24	2	31	1	152	17.3	5.01	70.66	2	0	0	0.866	0.975833	75.03	113.3	86.7	55.68	50.51	Not Found	High	High	High	High	Not Found	High	High	High	High	1
FALSE	High	Master Protein	Q96RS6	NudC domain-containing protein 1 [OS=Homo sapiens]	0	12.337	5	2	10	2	583	66.7	5.11	31.49	2	0	0	0.59	0.784274	64.87	125.8	74.2	37.79	50.66	Not Found	High	High	High	High	Not Found	High	High	High	High	1
TRUE	High	Master Protein	O60645	Exocyst complex component 3 [OS=Homo sapiens]	0	12.336	8	4	6	4	745	85.5	6.29	16.73	4	0	0	0.01	5.5167e-17	185.34	186.1	13.9	110.44	138.74	Not Found	Not Found	High	Not Found	High	Not Found	Not Found	High	Peak Found	Not Found	1
FALSE	High	Master Protein	P42345	Serine/threonine-protein kinase mTOR [OS=Homo sapiens]	0	12.298	1	2	7	2	2549	288.7	7.17	15.61	2	0	0	0.467	0.757939	18.01	174.3	25.7		97.18	Not Found	Not Found	Not Found	Not Found	High	Not Found	High	Peak Found	High	High	1
FALSE	High	Master Protein	Q9Y3A3	MOB-like protein phocein [OS=Homo sapiens]	0	12.294	24	3	14	3	225	26	5.78	30.09	3	0	0	0.825	0.97785	97.98	120	80	48.05	65.58	Peak Found	High	High	High	Peak Found	Peak Found	High	High	High	High	1
TRUE	High	Master Protein	P27694	Replication protein A 70 kDa DNA-binding subunit [OS=Homo sapiens]	0	12.289	9	2	3	2	616	68.1	7.21	11.3	2	0	0	13.287	3.15804e-08	0	14	186			Not Found	Not Found	High	Not Found	High	Not Found	Not Found	Not Found	Not Found	High	1
FALSE	High	Master Protein	Q8WYQ3	Coiled-coil-helix-coiled-coil-helix domain-containing protein 10, mitochondrial [OS=Homo sapiens]	0	12.263	16	1	55	1	142	14.1	7.84	205.42	1	0	0	0.751	0.835614	90.13	107	93	86	55.5	High	High	High	High	High	High	High	High	High	High	1
TRUE	High	Master Protein	Q8NBS9	Thioredoxin domain-containing protein 5 [OS=Homo sapiens]	0	12.255	14	3	6	3	432	47.6	5.97	9.2	3	0	0	100	5.5167e-17			200		57.3	Not Found	Not Found	High	Not Found	Not Found	High	High	High	High	High	1
FALSE	High	Master Protein	O00291	Huntingtin-interacting protein 1 [OS=Homo sapiens]	0	12.249	5	2	7	2	1037	116.1	5.3	18.14	2	0	0	0.501	0.818934	120.04	135.4	64.6	37.5	109.73	Not Found	High	High	Peak Found	High	Not Found	Not Found	Not Found	Peak Found	High	1
FALSE	High	Master Protein	Q04637	Eukaryotic translation initiation factor 4 gamma 1 [OS=Homo sapiens]	0	12.247	5	4	8	4	1599	175.4	5.33	16.08	4	0	0	1.142	0.835614	70.24	98.7	101.3	57.05	51.54	Peak Found	Peak Found	High	High	Not Found	Not Found	High	High	Peak Found	High	1
FALSE	High	Master Protein	P13716	Delta-aminolevulinic acid dehydratase [OS=Homo sapiens]	0	12.236	19	3	9	3	330	36.3	6.79	17.95	3	0	0	1.458	0.535163	82.52	65.3	134.7	63.38	32.79	Not Found	Peak Found	High	High	Peak Found	High	High	High	High	High	1	Acetyl [N-Term]
FALSE	High	Master Protein	Q9NVD7	Alpha-parvin [OS=Homo sapiens]	0	12.228	10	3	5	3	372	42.2	5.95	9.17	3	0	0	1.231	0.784274	71.28	78	122	62.93	48.35	Not Found	Peak Found	Peak Found	Peak Found	High	Peak Found	Peak Found	High	Not Found	High	1
FALSE	High	Master Protein	P14324	Farnesyl pyrophosphate synthase [OS=Homo sapiens]	0	12.22	9	3	64	3	419	48.2	6.15	113.71	3	0	0	0.595	0.792188	64.72	134.5	65.5	40.64	68.23	Not Found	High	High	High	High	Peak Found	High	High	High	High	1
FALSE	High	Master Protein	Q96AY3	Peptidyl-prolyl cis-trans isomerase FKBP10 [OS=Homo sapiens]	0	12.196	4	1	9	1	582	64.2	5.62	35.85	1	0	0	0.654	0.458397	67.61	125.3	74.7	29.29	57	Not Found	High	High	High	High	Peak Found	High	High	High	High	1
FALSE	High	Master Protein	O60493	Sorting nexin-3 [OS=Homo sapiens]	0	12.177	25	3	23	2	162	18.8	8.66	51.58	3	0	1	0.946	0.924788	124.82	95.7	104.3	94.52	92.74	Peak Found	High	High	High	High	High	Peak Found	High	High	High	1
FALSE	High	Master Protein	Q32P28	Prolyl 3-hydroxylase 1 [OS=Homo sapiens]	0	12.159	5	2	7	2	736	83.3	5.14	8.31	2	0	0	0.292	0.426989	37.34	168.1	31.9	77.69	98.87	Not Found	High	High	High	Not Found	Not Found	Peak Found	High	Peak Found	Peak Found	1
FALSE	High	Master Protein	Q15008	26S proteasome non-ATPase regulatory subunit 6 [OS=Homo sapiens]	0	12.141	12	3	7	3	389	45.5	5.62	18.12	3	0	0	0.948	0.920671	26.43	125	75	50.73	114.36	Not Found	High	High	High	Not Found	Peak Found	Peak Found	High	High	High	1
FALSE	High	Master Protein	P12110	Collagen alpha-2(VI) chain [OS=Homo sapiens]	0	12.118	5	2	12	2	1019	108.5	6.21	35.63	2	0	0	0.509	0.146136	118.53	143.6	56.4	119.4	69.24	High	Not Found	High	High	High	Peak Found	High	High	High	High	1
TRUE	High	Master Protein	Q13155	Aminoacyl tRNA synthase complex-interacting multifunctional protein 2 [OS=Homo sapiens]	0	12.105	14	2	20	2	320	35.3	8.22	46.5	2	0	0	0.333	0.0290658	99.98	160	40	60.88	79.97	Peak Found	High	High	High	Peak Found	High	High	High	High	High	1
FALSE	High	Master Protein	Q32MZ4	Leucine-rich repeat flightless-interacting protein 1 [OS=Homo sapiens]	0	12.101	5	2	19	2	808	89.2	4.65	57.28	2	0	0	1.31	0.73043	85.84	64.9	135.1	54.03	55.02	Peak Found	High	High	High	High	Peak Found	High	High	High	High	1
FALSE	High	Master Protein	P61011	Signal recognition particle 54 kDa protein [OS=Homo sapiens]	0	12.091	7	2	10	2	504	55.7	8.75	26.21	2	0	0	1.387	0.567032	64.44	67.4	132.6	32.19	105.02	Not Found	High	High	High	High	Peak Found	High	High	High	High	1
FALSE	High	Master Protein	Q9Y2B0	Protein canopy homolog 2 [OS=Homo sapiens]	0	12.076	17	2	39	2	182	20.6	4.92	94.59	2	0	0	0.601	0.518775	51.62	131.9	68.1	43.81	49.2	Not Found	High	High	Peak Found	High	Peak Found	High	High	High	High	1
FALSE	High	Master Protein	Q7L775	EPM2A-interacting protein 1 [OS=Homo sapiens]	0	12.062	10	3	9	3	607	70.3	6.11	30.17	3	0	0	1.68	0.51478	65.95	69.9	130.1	29.8	66.68	Not Found	High	High	Peak Found	High	Peak Found	Peak Found	High	High	High	1
FALSE	High	Master Protein	O95260	Arginyl-tRNA--protein transferase 1 [OS=Homo sapiens]	0	12.036	12	3	4	3	518	59.1	7.93	11.34	3	0	0	0.429	0.616154	113.99	48.5	151.5	127	82.77	High	Not Found	Peak Found	Peak Found	Peak Found	Not Found	Not Found	High	High	Peak Found	1
FALSE	High	Master Protein	Q9NP92	39S ribosomal protein S30, mitochondrial [OS=Homo sapiens]	0	12.027	12	3	20	3	439	50.3	7.97	26.09	3	0	0	0.382	0.331397	124.86	148.9	51.1	72.89	110.98	Peak Found	High	High	High	High	High	High	High	High	High	1
FALSE	High	Master Protein	P46937	Transcriptional coactivator YAP1 [OS=Homo sapiens]	0	12.004	14	3	11	3	504	54.4	5.17	28.15	3	0	0	0.775	0.992943	133.53	104.9	95.1	125.23	85.98	High	High	Peak Found	High	Peak Found	High	High	High	High	High	1
FALSE	High	Master Protein	P35080	Profilin-2 [OS=Homo sapiens]	0	11.96	30	3	16	3	140	15	6.99	38.13	3	0	0	3.031	0.15854	140.71	37	163	109.64	78.95	Peak Found	High	High	High	High	High	High	High	High	High	1
FALSE	High	Master Protein	P52888	Thimet oligopeptidase [OS=Homo sapiens]	0	11.955	13	4	6	4	689	78.8	6.05	13.41	4	0	0	0.635	0.862465	90.89	154.5	45.5	48.64	96.14	Not Found	Peak Found	High	Peak Found	High	Not Found	High	High	High	Not Found	1
FALSE	High	Master Protein	P26368	Splicing factor U2AF 65 kDa subunit [OS=Homo sapiens]	0	11.953	9	3	16	3	475	53.5	9.09	16.89	3	0	0	0.34	0.524061	93.68	105.1	94.9	71.25	101	Peak Found	High	Peak Found	Peak Found	High	High	Peak Found	High	Peak Found	High	1
FALSE	High	Master Protein	P49354	Protein farnesyltransferase/geranylgeranyltransferase type-1 subunit alpha [OS=Homo sapiens]	0	11.947	8	3	11	3	379	44.4	5.08	29.88	3	0	0	1.442	0.541484	91.07	93	107	38.74	77.98	Not Found	High	Peak Found	Not Found	High	Peak Found	High	High	Peak Found	High	1
FALSE	High	Master Protein	O95749	Geranylgeranyl pyrophosphate synthase [OS=Homo sapiens]	0	11.941	11	2	28	2	300	34.8	6.14	49.71	2	0	0	0.774	0.966267	84.27	98.7	101.3	15.14	63.85	Not Found	High	High	High	High	Not Found	High	Peak Found	High	High	1
FALSE	High	Master Protein	Q9P0J1	[Pyruvate dehydrogenase [acetyl-transferring]]-phosphatase 1, mitochondrial [OS=Homo sapiens]	0	11.94	11	3	10	3	537	61	6.67	22.55	3	0	0	0.333	0.37336	43.49	142.7	57.3	35.63	33.56	Peak Found	Peak Found	High	Peak Found	High	High	High	High	Not Found	High	1
FALSE	High	Master Protein	Q9UM22	Mammalian ependymin-related protein 1 [OS=Homo sapiens]	0	11.921	14	4	19	4	224	25.4	6.6	32.15	4	0	0	0.549	0.303389	79.87	128.3	71.7	35.51	54.57	High	High	High	High	High	Peak Found	High	High	Peak Found	High	1
TRUE	High	Master Protein	Q15286	Ras-related protein Rab-35 [OS=Homo sapiens]	0	11.92	14	2	10	1	201	23	8.29	29.17	2	0	0	3.599	0.00894309	51.68	43.5	156.5	28.44	57.59	Not Found	High	Peak Found	High	High	High	High	High	Not Found	High	1
FALSE	High	Master Protein	P46926	Glucosamine-6-phosphate isomerase 1 [OS=Homo sapiens]	0	11.911	26	4	36	4	289	32.6	6.92	81.64	4	0	0	0.516	0.539405	106.33	97.3	102.7	17.23	63.57	Not Found	High	High	High	High	Not Found	Peak Found	High	High	High	1
FALSE	High	Master Protein	P82933	28S ribosomal protein S9, mitochondrial [OS=Homo sapiens]	0	11.904	12	3	11	3	396	45.8	9.51	20.3	3	0	0	0.378	0.290309	117.67	147.3	52.7	124.71	182.37	Peak Found	High	High	Peak Found	High	High	High	High	Peak Found	High	1
FALSE	High	Master Protein	Q07955	Serine/arginine-rich splicing factor 1 [OS=Homo sapiens]	0	11.869	22	3	29	3	248	27.7	10.36	60.94	3	0	0	0.576	0.410495	128.72	67.4	132.6	144.95	81.32	Not Found	High	High	High	High	High	High	High	Peak Found	High	1
FALSE	High	Master Protein	Q9NRX2	39S ribosomal protein L17, mitochondrial [OS=Homo sapiens]	0	11.857	9	2	7	2	175	20	10.11	22.49	2	0	0	0.608	0.866632	50.76	129.2	70.8	49.94	51.49	Not Found	High	Peak Found	Peak Found	High	High	High	High	Peak Found	Peak Found	1
FALSE	High	Master Protein	O15400	Syntaxin-7 [OS=Homo sapiens]	0	11.846	10	1	23	1	261	29.8	5.55	72.66	1	0	0	0.433	0.665807	103.28	150.3	49.7	68.01	60.36	Not Found	High	High	High	Peak Found	High	High	High	High	High	1
FALSE	High	Master Protein	P34913	Bifunctional epoxide hydrolase 2 [OS=Homo sapiens]	0	11.839	8	3	10	3	555	62.6	6.28	19.29	3	0	0	0.462	0.513141	108.45	113.5	86.5	54.31	91.93	Not Found	High	Not Found	Peak Found	High	High	High	High	Peak Found	Not Found	1
FALSE	High	Master Protein	O14964	Hepatocyte growth factor-regulated tyrosine kinase substrate [OS=Homo sapiens]	0	11.831	4	2	4	2	777	86.1	6.16	13.29	2	0	0	1.449	0.537142	123.72	124.5	75.5	75.26	90.18	Not Found	Peak Found	High	Not Found	High	Peak Found	High	Peak Found	Not Found	Peak Found	1
TRUE	High	Master Protein	Q6PD62	RNA polymerase-associated protein CTR9 homolog [OS=Homo sapiens]	0	11.827	2	1	1	1	1173	133.4	6.77	6.32	1	0	0	0.01	5.5167e-17		200				Not Found	Not Found	High	Not Found	Not Found	Not Found	Not Found	Not Found	Not Found	Not Found	1
FALSE	High	Master Protein	Q15631	Translin [OS=Homo sapiens]	0	11.815	25	3	20	3	228	26.2	6.44	41.7	3	0	0	1.089	0.805823	77.11	113.4	86.6	55.39	31.92	Not Found	High	High	High	High	High	High	High	High	High	1
FALSE	High	Master Protein	O00442	RNA 3'-terminal phosphate cyclase [OS=Homo sapiens]	0	11.815	12	2	18	2	366	39.3	7.85	36.97	2	0	0	0.458	0.416597	65.08	67.7	132.3	43.56	181.99	Not Found	High	High	High	High	High	High	High	High	High	1
FALSE	High	Master Protein	Q14165	Malectin [OS=Homo sapiens]	0	11.815	12	3	20	3	292	32.2	5.41	46.48	3	0	0	1.044	0.861978	123.49	122.9	77.1	71.32	101.23	Not Found	High	High	High	High	High	High	High	High	High	1
FALSE	High	Master Protein	P63027	Vesicle-associated membrane protein 2 [OS=Homo sapiens]	0	11.812	34	2	15	1	116	12.7	8.13	49.13	2	0	1	1.176	0.816064	127.75	89.3	110.7	123.91	129.07	Not Found	Not Found	High	Not Found	Not Found	Not Found	Not Found	High	Not Found	Not Found	1
FALSE	High	Master Protein	P55042	GTP-binding protein RAD [OS=Homo sapiens]	0	11.808	13	2	12	2	308	33.2	8.88	41.76	2	0	0	0.52	0.45892	64.97	130.6	69.4	40.27	64.19	Not Found	High	High	Peak Found	High	High	High	High	High	High	1
FALSE	High	Master Protein	Q9H832	Ubiquitin-conjugating enzyme E2 Z [OS=Homo sapiens]	0	11.747	10	2	12	2	354	38.2	5.62	41.46	2	0	0	2.265	0.30872	124.65	42.5	157.5	71.53	16.52	Not Found	High	High	High	High	Not Found	High	High	High	High	1
FALSE	High	Master Protein	Q9H987	Synaptopodin 2-like protein [OS=Homo sapiens]	0	11.746	5	2	7	2	977	102.4	9.74	23.48	2	0	0	0.812	0.992943	56.04	110.4	89.6	106.19	90.51	High	Peak Found	Peak Found	High	Peak Found	High	Peak Found	High	High	Not Found	1
FALSE	High	Master Protein	Q9Y4K0	Lysyl oxidase homolog 2 [OS=Homo sapiens]	0	11.723	7	3	13	3	774	86.7	6.38	12.03	3	0	0	0.422	0.701651	130.47	47.1	152.9	193.99	202.58	High	Peak Found	High	High	High	Peak Found	High	High	High	Peak Found	1
TRUE	High	Master Protein	O00743	Serine/threonine-protein phosphatase 6 catalytic subunit [OS=Homo sapiens]	0	11.72	13	2	4	2	305	35.1	5.69	14.43	2	0	0	100	5.5167e-17			200		58.87	Not Found	High	Not Found	Not Found	Not Found	Not Found	High	High	High	Peak Found	1
FALSE	High	Master Protein	P62314	Small nuclear ribonucleoprotein Sm D1 [OS=Homo sapiens]	0	11.718	37	3	7	3	119	13.3	11.56	20.82	3	0	0	1.981	0.345805	78.91	134.1	65.9	91.22	123.53	Not Found	Peak Found	High	Peak Found	High	Not Found	High	High	Peak Found	High	1
FALSE	High	Master Protein	Q9Y6A4	Cilia- and flagella-associated protein 20 [OS=Homo sapiens]	0	11.691	13	2	10	2	193	22.8	9.76	22.63	2	0	0	1.476	0.391108	131.19	26.6	173.4	132.16	90	Peak Found	High	High	High	High	High	High	High	High	High	1
FALSE	High	Master Protein	Q8NE86	Calcium uniporter protein, mitochondrial [OS=Homo sapiens]	0	11.684	9	2	4	2	351	39.8	8.65	9.77	2	0	0	0.622	0.924788	83.06	121.4	78.6	8.14	55.86	Not Found	Peak Found	High	Peak Found	Peak Found	Not Found	Peak Found	High	Peak Found	High	1
FALSE	High	Master Protein	Q6ZVF9	G protein-regulated inducer of neurite outgrowth 3 [OS=Homo sapiens]	0	11.618	8	3	6	3	776	82.4	7.56	11.62	3	0	0	0.794	0.988239	89.77	81.2	118.8	71.44	77.3	Not Found	Peak Found	High	Peak Found	Not Found	High	Peak Found	High	Peak Found	Not Found	1
FALSE	High	Master Protein	O14949	Cytochrome b-c1 complex subunit 8 [OS=Homo sapiens]	0	11.602	41	2	22	2	82	9.9	10.08	51.41	2	0	0	2.039	0.405391	90.85	86.2	113.8	58.65	83.15	Not Found	High	High	High	High	High	High	High	High	High	1
FALSE	High	Master Protein	O95292	Vesicle-associated membrane protein-associated protein B/C [OS=Homo sapiens]	0	11.557	16	2	5	2	243	27.2	7.3	8.44	2	0	0	0.189	0.176749	116.28	54.1	145.9	143.08	117.95	High	High	Peak Found	High	Peak Found	High	Peak Found	High	Not Found	Not Found	1
TRUE	High	Master Protein	Q7L311	Armadillo repeat-containing X-linked protein 2 [OS=Homo sapiens]	0	11.552	5	2	3	2	632	65.6	8.53	10.32	2	0	0	0.01	5.5167e-17		200		17.31		Not Found	High	High	Not Found	Peak Found	Not Found	Not Found	Not Found	Not Found	Not Found	1
FALSE	High	Master Protein	P53701	Holocytochrome c-type synthase [OS=Homo sapiens]	0	11.551	25	3	11	3	268	30.6	6.68	25.6	3	0	0	0.774	0.980195	76.2	118.7	81.3	73.51	30.1	Peak Found	High	High	High	Peak Found	High	High	High	High	Peak Found	1
FALSE	High	Master Protein	Q9UJW0	Dynactin subunit 4 [OS=Homo sapiens]	0	11.538	9	3	4	3	460	52.3	7.34	9.38	3	0	0	1.151	0.806378	46.07	93	107		41.97	Not Found	Not Found	Not Found	High	Not Found	Not Found	Peak Found	High	High	Not Found	1
FALSE	High	Master Protein	O43681	ATPase GET3 [OS=Homo sapiens]	0	11.529	10	2	8	2	348	38.8	4.91	20.81	2	0	0	0.604	0.726517	89.85	52.8	147.2	133.14	55.09	High	Peak Found	High	Peak Found	High	Not Found	Peak Found	Peak Found	Peak Found	High	1
FALSE	High	Master Protein	P51812	Ribosomal protein S6 kinase alpha-3 [OS=Homo sapiens]	0	11.518	5	2	7	2	740	83.7	6.89	23.76	2	0	0	0.882	0.944462	69.32	35.2	164.8	62.08	39.06	Not Found	High	Peak Found	High	High	High	High	High	Peak Found	High	1
FALSE	High	Master Protein	P17568	NADH dehydrogenase [ubiquinone] 1 beta subcomplex subunit 7 [OS=Homo sapiens]	0	11.512	12	2	56	2	137	16.4	8.92	138.19	2	0	0	0.956	0.932413	62.44	125.3	74.7	49.41	54.79	Peak Found	High	High	Peak Found	High	High	High	High	High	High	1
FALSE	High	Master Protein	P09012	U1 small nuclear ribonucleoprotein A [OS=Homo sapiens]	0	11.498	8	2	17	2	282	31.3	9.83	41.85	2	0	0	0.72	0.925469	106.78	136	64	52	59.8	Not Found	High	High	High	High	Not Found	High	Peak Found	High	High	1
TRUE	High	Master Protein	P16104	Histone H2AX [OS=Homo sapiens]	0	11.488	46	3	10	1	143	15.1	10.74	24.3	3	0	2	0.107	0.000109582	1.66	170.9	29.1	45.31	124.35	Not Found	Peak Found	Not Found	High	Not Found	Not Found	High	High	Not Found	Not Found	1
FALSE	High	Master Protein	Q13418	Integrin-linked protein kinase [OS=Homo sapiens]	0	11.481	8	2	14	2	452	51.4	8.07	28.73	2	0	0	1.18	0.75344	108.12	119.5	80.5	73.23	165.66	Peak Found	High	High	Peak Found	High	High	High	High	High	High	1
TRUE	High	Master Protein	P06865	Beta-hexosaminidase subunit alpha [OS=Homo sapiens]	0	11.472	6	2	3	2	529	60.7	5.16	7.44	2	0	0	100	5.5167e-17			200			Not Found	Not Found	Not Found	Not Found	Not Found	Not Found	Not Found	High	Not Found	High	1
FALSE	High	Master Protein	O75475	PC4 and SFRS1-interacting protein [OS=Homo sapiens]	0	11.459	7	2	9	2	530	60.1	9.13	31.02	2	0	0	1.228	0.535221	58.74	82.6	117.4	69.9	33.62	Not Found	High	High	High	High	Peak Found	High	High	High	High	1
FALSE	High	Master Protein	O15235	28S ribosomal protein S12, mitochondrial [OS=Homo sapiens]	0	11.445	18	1	8	1	138	15.2	10.29	20.22	1	0	0	0.568	0.794205	66.26	128.9	71.1	23.7	73.71	Not Found	High	High	High	Not Found	Peak Found	High	High	High	Not Found	1
FALSE	High	Master Protein	O60832	H/ACA ribonucleoprotein complex subunit DKC1 [OS=Homo sapiens]	0	11.436	10	3	6	3	514	57.6	9.42	9.7	3	0	0	0.701	0.957271	118.32	127.3	72.7	113.62	83.85	Not Found	High	High	Peak Found	High	High	Peak Found	Peak Found	Not Found	High	1
FALSE	High	Master Protein	O76003	Glutaredoxin-3 [OS=Homo sapiens]	0	11.406	8	1	4	1	335	37.4	5.39	18.99	1	0	0								Not Found	Not Found	Not Found	Not Found	High	High	High	High	Not Found	Not Found	1
FALSE	High	Master Protein	Q13405	39S ribosomal protein L49, mitochondrial [OS=Homo sapiens]	0	11.369	16	2	21	2	166	19.2	9.45	43.47	2	0	0	0.294	0.426989	129.73	154.6	45.4	51.7	164.87	Peak Found	High	High	Peak Found	Not Found	Peak Found	High	High	Peak Found	Not Found	1
TRUE	High	Master Protein	P61421	V-type proton ATPase subunit d 1 [OS=Homo sapiens]	0	11.355	11	2	3	2	351	40.3	5	10.1	2	0	0	100	5.5167e-17			200		125.69	Not Found	Not Found	Not Found	Not Found	Not Found	Not Found	High	High	Peak Found	High	1
FALSE	High	Master Protein	Q53H12	Acylglycerol kinase, mitochondrial [OS=Homo sapiens]	0	11.331	9	2	11	2	422	47.1	8.09	12.6	2	0	0	0.869	0.995521	60.06	48.2	151.8	101.4	67.16	Not Found	High	Peak Found	High	High	Not Found	High	High	High	High	1
FALSE	High	Master Protein	Q03135	Caveolin-1 [OS=Homo sapiens]	0	11.329	20	2	14	2	178	20.5	6.02	41.34	2	0	0	1.058	0.853543	63.04	97.2	102.8	34.09	50.84	High	High	Peak Found	High	High	High	High	High	Peak Found	High	1
TRUE	High	Master Protein	Q92538	Golgi-specific brefeldin A-resistance guanine nucleotide exchange factor 1 [OS=Homo sapiens]	0	11.293	2	3	6	3	1859	206.3	5.73	16.48	3	0	0	100	5.5167e-17			200		53.75	Not Found	Not Found	High	High	High	Not Found	Peak Found	High	Not Found	High	1
FALSE	High	Master Protein	Q9NX40	OCIA domain-containing protein 1 [OS=Homo sapiens]	0	11.288	13	2	35	2	245	27.6	7.49	105.06	2	0	0	0.444	0.469171	68.33	132.2	67.8	59.13	26.05	Peak Found	High	High	High	High	Not Found	Peak Found	High	High	High	1
FALSE	High	Master Protein	Q15836	Vesicle-associated membrane protein 3 [OS=Homo sapiens]	0	11.274	40	2	14	1	100	11.3	8.79	46.27	2	0	0	2.696	0.58606	62.11	54.1	145.9		54.64	Not Found	Not Found	Peak Found	Not Found	Not Found	Not Found	Peak Found	Not Found	High	Not Found	1
FALSE	High	Master Protein	O95822	Malonyl-CoA decarboxylase, mitochondrial [OS=Homo sapiens]	0	11.253	10	4	5	4	493	55	8.95	10.02	4	0	0	0.538	0.832792	144.7	141.7	58.3	125.71	116.58	Not Found	High	High	Peak Found	Peak Found	Not Found	Peak Found	High	Peak Found	Peak Found	1
FALSE	High	Master Protein	Q8IXS6	Paralemmin-2 [OS=Homo sapiens]	0	11.25	8	2	22	2	379	42.2	5.1	68.8	2	0	0	0.493	0.619116	95.34	139.5	60.5	43.15	95.5	High	High	High	High	High	Not Found	High	High	High	Peak Found	1
TRUE	High	Master Protein	Q9C0B1	Alpha-ketoglutarate-dependent dioxygenase FTO [OS=Homo sapiens]	0	11.228	10	3	9	3	505	58.2	5.22	20.61	3	0	0	7.158	0.00254488	101.92	10.2	189.8	154.84	43.46	Not Found	Peak Found	High	Peak Found	High	High	High	High	High	High	1
FALSE	High	Master Protein	Q53GQ0	Very-long-chain 3-oxoacyl-CoA reductase [OS=Homo sapiens]	0	11.22	8	2	16	2	312	34.3	9.32	29.31	2	0	0	1.737	0.152269	95.46	69.2	130.8	126.14	53.03	Not Found	Peak Found	High	High	High	High	High	High	High	High	1
FALSE	High	Master Protein	Q9NZB2	Constitutive coactivator of PPAR-gamma-like protein 1 [OS=Homo sapiens]	0	11.181	4	3	5	3	1118	121.8	8.88	12.76	3	0	0	0.323	0.488	92.34	155.9	44.1	32.84	78.39	Not Found	Peak Found	High	High	High	Not Found	Peak Found	High	High	Not Found	1
FALSE	High	Master Protein	O00567	Nucleolar protein 56 [OS=Homo sapiens]	0	11.14	5	2	11	2	594	66	9.19	16.25	2	0	0	0.901	0.937916	85.12	86.9	113.1	55.06	31.51	Peak Found	High	High	High	High	Not Found	High	High	High	High	1
FALSE	High	Master Protein	Q9Y399	28S ribosomal protein S2, mitochondrial [OS=Homo sapiens]	0	11.123	7	1	5	1	296	33.2	9.26	21.68	1	0	0	1.238	0.780902	74.53	86.7	113.3	84.57	33.37	Not Found	High	Not Found	Peak Found	High	High	Peak Found	High	Peak Found	High	1
FALSE	High	Master Protein	Q9UMY4	Sorting nexin-12 [OS=Homo sapiens]	0	11.073	25	3	10	2	162	18.9	8.44	19.11	3	0	0	1.577	0.426989	75.03	73.1	126.9	61.3	50.83	Not Found	High	High	Peak Found	Peak Found	Peak Found	High	Peak Found	High	High	1
TRUE	High	Master Protein	Q58FF6	Putative heat shock protein HSP 90-beta 4 [OS=Homo sapiens]	0	11.067	7	2	17	1	505	58.2	4.73	52.21	2	0	0	0.168	0.038176	141.19	171.2	28.8	26.92	157.52	Not Found	Peak Found	High	Not Found	Not Found	Not Found	Peak Found	High	Peak Found	Not Found	1
FALSE	High	Master Protein	P83111	Serine beta-lactamase-like protein LACTB, mitochondrial [OS=Homo sapiens]	0	11.057	7	2	10	2	547	60.7	8.53	32.11	2	0	0	0.38	0.38669	101.61	117.8	82.2	100.64	75.03	Not Found	High	Peak Found	High	Peak Found	Peak Found	High	High	High	High	1
TRUE	High	Master Protein	O75380	NADH dehydrogenase [ubiquinone] iron-sulfur protein 6, mitochondrial [OS=Homo sapiens]	0	11.051	18	1	14	1	124	13.7	8.28	55.64	1	0	0	0.239	2.37297e-06	55.85	149.2	50.8	54.67	42.22	High	High	High	High	Peak Found	High	High	High	High	High	1
TRUE	High	Master Protein	O60237	Protein phosphatase 1 regulatory subunit 12B [OS=Homo sapiens]	0	11.044	6	3	4	3	982	110.3	5.67	12.51	3	0	0	100	5.5167e-17			200		48.48	Not Found	Not Found	Not Found	Not Found	Not Found	High	High	High	Peak Found	Peak Found	1
FALSE	High	Master Protein	O43399	Tumor protein D54 [OS=Homo sapiens]	0	11	15	2	31	2	206	22.2	5.36	105.68	2	0	0	0.566	0.218918	94.06	119.8	80.2	84.23	50.19	Peak Found	High	Peak Found	High	High	Peak Found	High	High	High	High	1
FALSE	High	Master Protein	O14639	Actin-binding LIM protein 1 [OS=Homo sapiens]	0	10.969	5	2	6	2	778	87.6	8.59	12.38	2	0	0	0.827	0.980195	134.29	59.3	140.7	137.03	96.23	Not Found	Peak Found	Peak Found	High	High	Peak Found	Peak Found	High	Peak Found	High	1
TRUE	High	Master Protein	Q9H074	Polyadenylate-binding protein-interacting protein 1 [OS=Homo sapiens]	0	10.96	11	3	3	3	479	53.5	4.81	5.1	3	0	0	0.178	0.134064	478.98	164.5	35.5	0.92	137.12	High	Peak Found	Not Found	Peak Found	Not Found	Not Found	Not Found	High	Peak Found	Not Found	1
FALSE	High	Master Protein	Q99643	Succinate dehydrogenase cytochrome b560 subunit, mitochondrial [OS=Homo sapiens]	0	10.955	17	2	11	2	169	18.6	9.69	38.47	2	0	0	0.905	0.955513	90.62	82.2	117.8	91.71	61.78	Not Found	High	High	High	High	Peak Found	High	High	High	High	1
TRUE	High	Master Protein	Q9BPX5	Actin-related protein 2/3 complex subunit 5-like protein [OS=Homo sapiens]	0	10.953	16	2	4	2	153	16.9	6.6	9.54	2	0	0	39.418	4.88265e-15	5.81	2	198	33.18		Not Found	Peak Found	Peak Found	Peak Found	Not Found	Not Found	Not Found	High	Not Found	Not Found	1
FALSE	High	Master Protein	O95139	NADH dehydrogenase [ubiquinone] 1 beta subcomplex subunit 6 [OS=Homo sapiens]	0	10.951	30	2	5	2	128	15.5	9.63	15.3	2	0	0	0.5	0.561401	70.53	128.1	71.9	39.24	77.5	Not Found	High	Peak Found	High	High	Not Found	Peak Found	Peak Found	High	High	1
FALSE	High	Master Protein	Q15063	Periostin [OS=Homo sapiens]	0	10.948	7	3	12	3	836	93.3	7.53	32.88	3	0	0	0.533	0.361012	68.53	109.9	90.1	25.49	38.74	Not Found	High	Not Found	High	High	High	High	High	High	High	1
TRUE	High	Master Protein	Q14C86	GTPase-activating protein and VPS9 domain-containing protein 1 [OS=Homo sapiens]	0	10.947	3	3	6	3	1478	164.9	5.22	12.26	3	0	0	100	5.5167e-17			200		23.35	Not Found	High	Not Found	High	Not Found	Peak Found	Not Found	High	High	Not Found	1
FALSE	High	Master Protein	Q9UKG1	DCC-interacting protein 13-alpha [OS=Homo sapiens]	0	10.941	5	2	5	2	709	79.6	5.41	13.87	2	0	0	0.301	0.235281	224.55	163.1	36.9	127.96	40.5	Not Found	High	Not Found	Not Found	High	Peak Found	High	High	Not Found	High	1
FALSE	High	Master Protein	Q71UI9	Histone H2A.V [OS=Homo sapiens]	0	10.935	13	2	14	2	128	13.5	10.58	41.14	2	0	0	0.761	0.918299	41.11	108.9	91.1	31.02	29.59	Not Found	High	High	High	High	High	High	High	High	High	1
TRUE	High	Master Protein	P16949	Stathmin [OS=Homo sapiens]	0	10.926	23	3	26	3	149	17.3	5.97	66.58	3	0	0	2.477	0.0789408	81.63	66.6	133.4	70.03	71.94	Not Found	High	High	Peak Found	High	Not Found	High	High	High	High	1
FALSE	High	Master Protein	Q9UBB4	Ataxin-10 [OS=Homo sapiens]	0	10.922	13	3	8	3	475	53.5	5.25	25.44	3	0	0	0.255	0.322366	115.45	162.2	37.8	77.54	150.6	Peak Found	High	High	High	Peak Found	Peak Found	High	High	Peak Found	High	1
TRUE	High	Master Protein	Q9NX46	ADP-ribosylhydrolase ARH3 [OS=Homo sapiens]	0	10.92	10	2	8	2	363	38.9	5.07	19.09	2	0	0	3.823	0.143562	92.92	112.3	87.7	44.7	83.6	Not Found	High	High	Peak Found	High	High	Peak Found	High	High	Not Found	1
FALSE	High	Master Protein	Q9H1H9	Kinesin-like protein KIF13A [OS=Homo sapiens]	0	10.918	3	3	5	3	1805	202.2	5.6	13	3	0	0	0.504	0.730596	126.26	156.5	43.5	189.47	112.33	Not Found	Peak Found	High	Peak Found	Peak Found	Not Found	Peak Found	High	High	High	1
FALSE	High	Master Protein	Q9Y5B9	FACT complex subunit SPT16 [OS=Homo sapiens]	0	10.903	5	3	24	3	1047	119.8	5.66	42.06	3	0	0	1.16	0.802666	128.3	30.6	169.4	143.29	73.42	Not Found	Peak Found	Peak Found	High	High	High	High	High	High	High	1
FALSE	High	Master Protein	Q9Y371	Endophilin-B1 [OS=Homo sapiens]	0	10.899	14	3	18	3	365	40.8	6.04	38.96	3	0	0	1.074	0.871261	49.5	116.2	83.8	41.06	73.34	Not Found	High	High	High	High	Not Found	High	High	Peak Found	High	1
FALSE	High	Master Protein	P55735	Protein SEC13 homolog [OS=Homo sapiens]	0	10.885	20	3	4	3	322	35.5	5.48	13.38	3	0	0	0.814	0.977232	79.71	72.5	127.5		42.29	Not Found	Not Found	Peak Found	High	Not Found	Not Found	Peak Found	High	High	Not Found	1
FALSE	High	Master Protein	Q9BRG1	Vacuolar protein-sorting-associated protein 25 [OS=Homo sapiens]	0	10.866	9	2	6	2	176	20.7	6.34	19.2	2	0	0	0.89	0.957273	72.36	105.8	94.2	32.14	77.36	Not Found	High	High	Peak Found	High	High	High	Peak Found	Peak Found	High	1
FALSE	High	Master Protein	Q9UKV3	Apoptotic chromatin condensation inducer in the nucleus [OS=Homo sapiens]	0	10.859	4	3	4	3	1341	151.8	6.43	6.89	3	0	0	1.258	0.80479	135.46	34	166	62.58	82.2	Not Found	High	Peak Found	Peak Found	Peak Found	Not Found	Peak Found	High	High	Peak Found	1
FALSE	High	Master Protein	Q9NX08	COMM domain-containing protein 8 [OS=Homo sapiens]	0	10.846	16	2	4	2	183	21.1	5.43	6.06	2	0	0	0.747	0.982667	84.28	116.3	83.7	51.33	67.56	Peak Found	Peak Found	High	Peak Found	High	Not Found	Peak Found	High	Peak Found	High	1
FALSE	High	Master Protein	P12109	Collagen alpha-1(VI) chain [OS=Homo sapiens]	0	10.809	3	2	5	2	1028	108.5	5.43	11.98	2	0	0	0.84	0.991661	71.68	106.5	93.5	12.37	108.3	Not Found	High	High	Not Found	Peak Found	Peak Found	High	High	Peak Found	Peak Found	1
FALSE	High	Master Protein	P50452	Serpin B8 [OS=Homo sapiens]	0	10.791	6	2	17	1	374	42.7	5.57	37	2	0	1	1.086	0.840353	93.08	86.9	113.1	52.55	85.1	Not Found	Peak Found	High	High	High	High	High	High	High	High	1
FALSE	High	Master Protein	Q8NFV4	Protein ABHD11 [OS=Homo sapiens]	0	10.782	12	3	3	3	315	34.7	9.48	7.29	3	0	0	0.588	0.829279	15.58	27.7	172.3	16.79		Not Found	Peak Found	Not Found	Peak Found	Peak Found	Not Found	Not Found	High	Not Found	Not Found	1
TRUE	High	Master Protein	Q9BS26	Endoplasmic reticulum resident protein 44 [OS=Homo sapiens]	0	10.781	13	3	9	3	406	46.9	5.26	22.34	3	0	0	2.121	0.108029	92.01	66.4	133.6	32.22	69.7	Not Found	Peak Found	Peak Found	High	High	High	High	High	Peak Found	High	1
FALSE	High	Master Protein	P54886	Delta-1-pyrroline-5-carboxylate synthase [OS=Homo sapiens]	0	10.759	4	3	8	3	795	87.2	7.12	11.38	3	0	0	2.655	0.595573	51.43	47.5	152.5		89.12	Not Found	Not Found	Peak Found	Not Found	High	Not Found	High	High	High	High	1
FALSE	High	Master Protein	Q9H0W9	Ester hydrolase C11orf54 [OS=Homo sapiens]	0	10.741	12	2	9	2	315	35.1	6.7	26.23	2	0	0	1.536	0.597946	74.26	68.6	131.4	35.47	66.73	High	High	High	Peak Found	Peak Found	High	Peak Found	High	High	Not Found	1
FALSE	High	Master Protein	Q6ZVM7	TOM1-like protein 2 [OS=Homo sapiens]	0	10.74	8	2	7	2	507	55.5	4.79	16.93	2	0	0	0.63	0.738705	79.4	175.3	24.7	50.33	121.22	Peak Found	High	High	Peak Found	High	High	High	Peak Found	Peak Found	High	1
FALSE	High	Master Protein	Q9BZF9	Uveal autoantigen with coiled-coil domains and ankyrin repeats [OS=Homo sapiens]	0	10.725	3	3	5	3	1416	162.4	7.03	7.69	3	0	0	1.995	0.76719	105.45	64.8	135.2	85.29	100.52	Not Found	Peak Found	High	Peak Found	Peak Found	Not Found	Peak Found	High	Peak Found	High	1
FALSE	High	Master Protein	P30085	UMP-CMP kinase [OS=Homo sapiens]	0	10.717	17	2	3	2	196	22.2	5.57	7.3	2	0	0	1.48	0.815997	116.17	80.6	119.4		87.22	Not Found	Not Found	High	High	Not Found	Not Found	Peak Found	Not Found	High	Not Found	1
FALSE	High	Master Protein	P21291	Cysteine and glycine-rich protein 1 [OS=Homo sapiens]	0	10.704	18	2	49	2	193	20.6	8.57	94.25	2	0	0	0.408	0.540508	128.57	141.2	58.8	66.6	157.86	Not Found	High	High	High	High	Peak Found	High	High	High	High	1
FALSE	High	Master Protein	P28072	Proteasome subunit beta type-6 [OS=Homo sapiens]	0	10.694	21	2	9	2	239	25.3	4.92	31.51	2	0	0	0.755	0.874003	69.38	108	92	81.62	16.08	High	Peak Found	High	Peak Found	High	High	High	High	High	High	1
FALSE	High	Master Protein	Q9UBQ5	Eukaryotic translation initiation factor 3 subunit K [OS=Homo sapiens]	0	10.682	6	1	22	1	218	25	4.93	47.86	1	0	0	1.104	0.845412	95.68	102	98	54.81	91.59	Not Found	High	High	High	Peak Found	Not Found	High	High	High	Peak Found	1
FALSE	High	Master Protein	Q99829	Copine-1 [OS=Homo sapiens]	0	10.678	5	2	6	2	537	59	5.83	24.23	2	0	0	0.823	0.912253	72.77	128.2	71.8	59.04	39.58	Not Found	High	High	Not Found	High	High	High	Peak Found	Not Found	High	1
FALSE	High	Master Protein	Q9Y3E1	Hepatoma-derived growth factor-related protein 3 [OS=Homo sapiens]	0	10.678	16	2	15	2	203	22.6	7.99	45.17	2	0	0	0.957	0.966267	83.32	104.8	95.2	66.93	44.87	Peak Found	High	High	High	High	Peak Found	High	High	High	High	1
FALSE	High	Master Protein	Q9UHV9	Prefoldin subunit 2 [OS=Homo sapiens]	0	10.639	12	1	27	1	154	16.6	6.58	80.72	1	0	0	0.629	0.703433	104.44	116.8	83.2	34.01	70.53	High	High	High	High	High	High	High	High	Peak Found	High	1
FALSE	High	Master Protein	P22059	Oxysterol-binding protein 1 [OS=Homo sapiens]	0	10.63	4	2	10	2	807	89.4	7.3	22	2	0	0	0.642	0.925504	67.12	114.8	85.2	26.62	36.02	Not Found	High	High	Peak Found	High	Not Found	High	High	High	High	1
TRUE	High	Master Protein	P62266	40S ribosomal protein S23 [OS=Homo sapiens]	0	10.623	20	1	1	1	143	15.8	10.49	5.45	1	0	0	0.01	5.5167e-17		200		70.39		Not Found	Not Found	Peak Found	Not Found	High	Not Found	Not Found	Not Found	Not Found	Not Found	1
FALSE	High	Master Protein	Q08380	Galectin-3-binding protein [OS=Homo sapiens]	0	10.608	5	2	13	2	585	65.3	5.27	39.64	2	0	0	0.945	0.957271	29.47	101.1	98.9	14.36	25.52	Not Found	High	High	High	High	High	High	High	High	High	1
FALSE	High	Master Protein	O95777	U6 snRNA-associated Sm-like protein LSm8 [OS=Homo sapiens]	0	10.59	42	2	6	2	96	10.4	4.48	13.53	2	0	0	0.51	0.534841	86.9	156.1	43.9	50.22	73.56	Not Found	High	High	Peak Found	High	Not Found	High	Peak Found	Not Found	Peak Found	1
TRUE	High	Master Protein	Q8ND24	RING finger protein 214 [OS=Homo sapiens]	0	10.588	6	2	4	2	703	77.6	6.95	10.97	2	0	0	100	5.5167e-17			200		82.79	Not Found	Not Found	Not Found	Not Found	Not Found	Not Found	High	High	High	Peak Found	1
FALSE	High	Master Protein	Q9H446	RWD domain-containing protein 1 [OS=Homo sapiens]	0	10.581	14	2	3	2	243	27.9	4.2	8.99	2	0	0				187.4	12.6	45.8		Not Found	High	Not Found	Not Found	High	Not Found	Not Found	High	Not Found	Not Found	1
FALSE	High	Master Protein	Q96L92	Sorting nexin-27 [OS=Homo sapiens]	0	10.58	7	2	9	2	541	61.2	6.49	25.55	2	0	0	1.457	0.624353	118.33	90.1	109.9	42.08	35.65	High	Peak Found	High	High	High	Peak Found	Peak Found	High	High	High	1
TRUE	High	Master Protein	Q6ZMI0	Protein phosphatase 1 regulatory subunit 21 [OS=Homo sapiens]	0	10.579	7	3	4	3	780	88.3	6.84	8.9	3	0	0	0.118	0.041363	60.18	175	25	74.65	52	Not Found	Peak Found	Peak Found	Not Found	High	Peak Found	Peak Found	High	Peak Found	Not Found	1
FALSE	High	Master Protein	Q9ULC4	Malignant T-cell-amplified sequence 1 [OS=Homo sapiens]	0	10.578	28	3	7	3	181	20.5	8.82	21.55	3	0	0	0.995	0.91459	70.42	37.9	162.1	174.23	109	Not Found	High	Peak Found	Peak Found	High	Not Found	Peak Found	High	High	Peak Found	1
FALSE	High	Master Protein	P28074	Proteasome subunit beta type-5 [OS=Homo sapiens]	0	10.572	14	2	23	2	263	28.5	6.92	34.2	2	0	0	0.426	0.420904	105.65	145.5	54.5	58.28	70.72	Peak Found	High	High	High	High	Peak Found	High	High	High	High	1
TRUE	High	Master Protein	Q14155	Rho guanine nucleotide exchange factor 7 [OS=Homo sapiens]	0	10.562	5	3	5	3	803	90	7.09	10.49	3	0	0	7.854	0.0326236	105.77	60.3	139.7	79.02	122.77	Not Found	High	Peak Found	Peak Found	Not Found	High	Not Found	High	Not Found	Peak Found	1
FALSE	High	Master Protein	O75054	Immunoglobulin superfamily member 3 [OS=Homo sapiens]	0	10.558	4	2	6	2	1194	135.1	6.07	5.68	2	0	0	1.877	0.380012	100.61	47.1	152.9	88.43	61.05	Not Found	Not Found	Peak Found	Peak Found	High	Peak Found	High	High	Peak Found	High	1
FALSE	High	Master Protein	Q12996	Cleavage stimulation factor subunit 3 [OS=Homo sapiens]	0	10.549	6	3	4	3	717	82.9	8.12	4.88	3	0	0	1.248	0.954709	4.51	89	111	4.3		Not Found	Peak Found	Not Found	High	Not Found	Not Found	Not Found	High	Not Found	High	1
FALSE	High	Master Protein	P18084	Integrin beta-5 [OS=Homo sapiens]	0	10.531	4	2	13	2	799	88	6.06	27.96	2	0	0	0.439	0.726517	85.94	138.6	61.4	38.83	56.52	Not Found	Peak Found	High	High	High	Not Found	High	High	High	High	1
TRUE	High	Master Protein	Q9NRN7	L-aminoadipate-semialdehyde dehydrogenase-phosphopantetheinyl transferase [OS=Homo sapiens]	0	10.527	15	4	4	4	309	35.8	6.8	6.76	4	0	0	28.155	2.08896e-05	0	3	197		33.05	Not Found	Not Found	Not Found	Not Found	Peak Found	Not Found	Peak Found	High	Peak Found	High	1
TRUE	High	Master Protein	P40616	ADP-ribosylation factor-like protein 1 [OS=Homo sapiens]	0	10.523	31	4	12	4	181	20.4	5.72	25.8	4	0	0	0.018	8.51481e-14	140.54	146.4	53.6	76.56	82	Not Found	High	Peak Found	Peak Found	High	Not Found	High	High	High	High	1
TRUE	High	Master Protein	O15355	Protein phosphatase 1G [OS=Homo sapiens]	0	10.507	10	2	3	2	546	59.2	4.36	7.15	2	0	0	100	5.5167e-17			200			Not Found	Not Found	Not Found	Not Found	High	Not Found	Not Found	High	Not Found	Not Found	1
TRUE	High	Master Protein	P30626	Sorcin [OS=Homo sapiens]	0	10.499	19	3	9	3	198	21.7	5.59	20.62	3	0	0	0.254	0.00499823	112.12	159.7	40.3	14.03	98.25	Not Found	Peak Found	High	Peak Found	High	Peak Found	Peak Found	High	High	High	1
FALSE	High	Master Protein	P02458	Collagen alpha-1(II) chain [OS=Homo sapiens]	0	10.496	4	3	18	3	1487	141.7	6.92	33.17	3	0	0	0.331	0.299613	72.22	141.8	58.2	71.78	55.33	High	High	High	High	Peak Found	High	High	High	High	Peak Found	1
FALSE	High	Master Protein	O14562	Ubiquitin domain-containing protein UBFD1 [OS=Homo sapiens]	0	10.473	6	1	28	1	309	33.4	5.77	79.22	1	0	0	0.993	0.904134	92.22	99.2	100.8	52.89	73.4	High	High	Peak Found	High	High	Not Found	High	High	High	High	1
FALSE	High	Master Protein	Q8IXI2	Mitochondrial Rho GTPase 1 [OS=Homo sapiens]	0	10.471	7	3	11	3	618	70.7	6.27	17.46	3	0	0	0.928	0.943617	55.89	102.7	97.3	40.84	50.25	Not Found	Peak Found	High	High	High	High	High	High	High	Peak Found	1
FALSE	High	Master Protein	Q9Y2Z9	Ubiquinone biosynthesis monooxygenase COQ6, mitochondrial [OS=Homo sapiens]	0	10.468	8	2	3	2	468	50.8	7.3	6.49	2	0	0	0.689	0.884297	94.95	131.5	68.5	62.57	87.94	Not Found	Peak Found	High	Peak Found	High	Not Found	Peak Found	Peak Found	Not Found	High	1
FALSE	High	Master Protein	Q969T9	WW domain-binding protein 2 [OS=Homo sapiens]	0	10.462	19	2	16	2	261	28.1	5.91	39.72	2	0	0	0.575	0.871261	119.74	104.2	95.8	87.69	67.42	Not Found	High	High	High	High	Peak Found	High	Peak Found	High	High	1
FALSE	High	Master Protein	Q8N684	Cleavage and polyadenylation specificity factor subunit 7 [OS=Homo sapiens]	0	10.437	11	3	4	3	471	52	8	9.14	3	0	0	1.074	0.806284	49.71	101.8	98.2	68.6	1.81	Not Found	High	Peak Found	Peak Found	Peak Found	Not Found	High	High	Not Found	Peak Found	1
FALSE	High	Master Protein	O15254	Peroxisomal acyl-coenzyme A oxidase 3 [OS=Homo sapiens]	0	10.436	6	3	7	3	700	77.6	7.25	9.02	3	0	0	1.127	0.866632	66.21	95.8	104.2	32.63	157.12	Not Found	High	Peak Found	Not Found	High	High	Peak Found	High	Peak Found	High	1
FALSE	High	Master Protein	O95155	Ubiquitin conjugation factor E4 B [OS=Homo sapiens]	0	10.431	3	2	7	2	1302	146.1	6.55	23.34	2	0	0	0.923	0.921271	57.68	103.3	96.7	31.54	53.04	Peak Found	High	Peak Found	High	High	Peak Found	High	High	Peak Found	High	1
FALSE	High	Master Protein	Q9Y2T2	AP-3 complex subunit mu-1 [OS=Homo sapiens]	0	10.429	15	3	9	3	418	46.9	6.93	23.33	3	0	0	1.751	0.459422	105.94	51.3	148.7	40.52	69.81	High	High	High	Peak Found	High	Not Found	Peak Found	Peak Found	High	High	1
FALSE	High	Master Protein	Q07666	KH domain-containing, RNA-binding, signal transduction-associated protein 1 [OS=Homo sapiens]	0	10.419	8	3	12	3	443	48.2	8.66	32.7	3	0	0	0.891	0.975833	135.16	73.7	126.3	74.77	64.78	Peak Found	High	High	High	High	High	High	High	Peak Found	High	1
FALSE	High	Master Protein	O15212	Prefoldin subunit 6 [OS=Homo sapiens]	0	10.415	20	2	15	2	129	14.6	8.88	40.48	2	0	0	1.666	0.335788	124.63	75	125	93.45	84.16	High	High	High	High	High	Peak Found	Peak Found	High	High	Peak Found	1
FALSE	High	Master Protein	Q9Y2Q9	28S ribosomal protein S28, mitochondrial [OS=Homo sapiens]	0	10.411	13	2	18	2	187	20.8	9.1	47.48	2	0	0	0.59	0.568175	114	119	81	116.85	58.01	Peak Found	Peak Found	High	Peak Found	High	Not Found	Peak Found	High	Peak Found	High	1
FALSE	High	Master Protein	Q7Z2Z2	Elongation factor-like GTPase 1 [OS=Homo sapiens]	0	10.41	4	2	10	2	1120	125.4	5.91	30.14	2	0	0	0.393	0.524715	52.54	140.5	59.5	44.31	76.5	Not Found	High	High	High	High	High	High	High	High	Peak Found	1
TRUE	High	Master Protein	P04066	Tissue alpha-L-fucosidase [OS=Homo sapiens]	0	10.406	8	2	3	2	466	53.7	6.84	8.02	2	0	0	0.128	0.0259199	77.51	156.9	43.1	58.23	60.55	Not Found	Peak Found	Peak Found	Peak Found	High	Not Found	High	Peak Found	Peak Found	Peak Found	1
FALSE	High	Master Protein	Q9UH65	Switch-associated protein 70 [OS=Homo sapiens]	0	10.379	6	2	7	2	585	69	5.87	21.8	2	0	0	0.787	0.957271	54.73	67.6	132.4	82.09	66.85	Not Found	High	High	Peak Found	High	Peak Found	Not Found	High	Not Found	High	1
FALSE	High	Master Protein	Q4KMQ2	Anoctamin-6 [OS=Homo sapiens]	0	10.371	4	2	4	2	910	106.1	7.77	8.58	2	0	0	2.007	0.633591	67.69	100.1	99.9	85.44	87.48	Not Found	High	Not Found	High	Not Found	Not Found	Peak Found	Peak Found	Peak Found	High	1
FALSE	High	Master Protein	Q13630	GDP-L-fucose synthase [OS=Homo sapiens]	0	10.369	7	1	19	1	321	35.9	6.6	27.39	1	0	0	1.047	0.919844	109.6	85.4	114.6	138.79	98.76	Peak Found	High	High	High	High	High	High	Peak Found	High	High	1
FALSE	High	Master Protein	O00273	DNA fragmentation factor subunit alpha [OS=Homo sapiens]	0	10.365	13	3	11	3	331	36.5	4.79	22.2	3	0	0	1.401	0.560429	94.88	65.7	134.3	98.98	43.1	Not Found	Not Found	High	Peak Found	High	Peak Found	High	High	High	High	1
FALSE	High	Master Protein	Q86Y39	NADH dehydrogenase [ubiquinone] 1 alpha subcomplex subunit 11 [OS=Homo sapiens]	0	10.347	30	2	17	2	141	14.8	8.72	56.95	2	0	0	0.614	0.695592	85.42	131.5	68.5	49.49	62.25	High	High	High	High	High	High	Peak Found	High	High	High	1
FALSE	High	Master Protein	O14874	[3-methyl-2-oxobutanoate dehydrogenase [lipoamide]] kinase, mitochondrial [OS=Homo sapiens]	0	10.341	22	4	6	4	412	46.3	8.82	5.35	4	0	0	0.881	0.966267	77.72	163.1	36.9	78.32	26.51	Not Found	Peak Found	Not Found	Not Found	High	Not Found	Not Found	High	High	High	1
FALSE	High	Master Protein	Q15388	Mitochondrial import receptor subunit TOM20 homolog [OS=Homo sapiens]	0	10.331	14	1	6	1	145	16.3	8.6	24.82	1	0	0	1.383	0.454894	53.47	85.7	114.3	64.35	24.56	Not Found	High	High	Peak Found	Peak Found	High	High	Peak Found	High	High	1
FALSE	High	Master Protein	P62888	60S ribosomal protein L30 [OS=Homo sapiens]	0	10.322	34	3	4	3	115	12.8	9.63	7.1	3	0	0	1.135	0.892772	59.79	80.9	119.1	55.52	156.31	Peak Found	High	High	Peak Found	Peak Found	Not Found	Peak Found	High	Peak Found	Peak Found	1
FALSE	High	Master Protein	O43719	HIV Tat-specific factor 1 [OS=Homo sapiens]	0	10.314	10	3	6	3	755	85.8	4.4	19.87	3	0	0	0.735	0.975833	99.99	118.3	81.7	84.35	61.07	Not Found	Peak Found	High	Not Found	High	Not Found	High	High	Peak Found	High	1
FALSE	High	Master Protein	Q16204	Coiled-coil domain-containing protein 6 [OS=Homo sapiens]	0	10.305	8	2	14	2	474	53.3	7.34	24.3	2	0	0	1.22	0.754143	116.96	57.8	142.2	57.4	81.86	Peak Found	High	High	Peak Found	High	Not Found	High	High	High	Peak Found	1
TRUE	High	Master Protein	Q9NP90	Ras-related protein Rab-9B [OS=Homo sapiens]	0	10.302	18	2	6	2	201	22.7	4.87	12.14	2	0	0	4.378	0.0641432	87.99	15.7	184.3		63.74	Not Found	Not Found	Not Found	Not Found	Peak Found	High	High	High	High	High	1
FALSE	High	Master Protein	Q12765	Secernin-1 [OS=Homo sapiens]	0	10.28	8	2	14	2	414	46.4	4.75	33.45	2	0	0	1.007	0.892772	70.25	97.8	102.2	43.86	98.39	Not Found	High	High	High	High	Not Found	High	High	High	High	1
FALSE	High	Master Protein	Q9H773	dCTP pyrophosphatase 1 [OS=Homo sapiens]	0	10.271	12	1	5	1	170	18.7	5.03	24.72	1	0	0	0.726	0.93608	101.76	115.9	84.1	83.99		Not Found	High	High	Peak Found	High	Not Found	Not Found	High	Not Found	High	1
FALSE	High	Master Protein	P11166	Solute carrier family 2, facilitated glucose transporter member 1 [OS=Homo sapiens]	0	10.268	4	3	5	3	492	54	8.72	11.43	3	0	0	0.591	0.740264	98.96	115.6	84.4	100.81	38.26	Not Found	Peak Found	Not Found	High	Not Found	Not Found	High	High	Peak Found	Peak Found	1
FALSE	High	Master Protein	P48059	LIM and senescent cell antigen-like-containing domain protein 1 [OS=Homo sapiens]	0	10.267	18	3	10	3	325	37.2	8.05	12.88	3	0	0	0.821	0.997448	100.21	93.3	106.7	42.38	61.14	Not Found	Peak Found	High	Peak Found	High	Not Found	High	High	High	High	1
FALSE	High	Master Protein	P19623	Spermidine synthase [OS=Homo sapiens]	0	10.247	11	2	14	2	302	33.8	5.49	37.92	2	0	0	0.7	0.921271	75.82	115.1	84.9	29.11	92.95	Peak Found	Peak Found	High	High	High	Peak Found	High	High	High	High	1
FALSE	High	Master Protein	P13073	Cytochrome c oxidase subunit 4 isoform 1, mitochondrial [OS=Homo sapiens]	0	10.236	25	4	10	4	169	19.6	9.51	19.27	4	0	0	0.786	0.992943	133.08	12.6	187.4	136.48	118.29	Peak Found	High	Peak Found	Peak Found	Peak Found	Not Found	High	High	Peak Found	Not Found	1
TRUE	High	Master Protein	P10114	Ras-related protein Rap-2a [OS=Homo sapiens]	0	10.203	14	1	6	1	183	20.6	4.82	23.56	1	0	0	0.01	5.5167e-17		200		19.96		Not Found	High	High	High	Not Found	Not Found	High	High	Not Found	High	1
FALSE	High	Master Protein	P15289	Arylsulfatase A [OS=Homo sapiens]	0	10.176	8	2	8	2	507	53.6	6.07	13.44	2	0	0	2.075	0.534841	85.44	65	135	76.53	32.07	Not Found	Peak Found	High	High	Peak Found	Not Found	High	Not Found	Not Found	High	1
TRUE	High	Master Protein	O15145	Actin-related protein 2/3 complex subunit 3 [OS=Homo sapiens]	0	10.176	17	3	13	3	178	20.5	8.59	17.5	3	0	0	7.834	1.61427e-05	88.7	12.9	187.1	54.5	63.4	Not Found	Peak Found	Not Found	High	Peak Found	Peak Found	High	High	Peak Found	High	1
FALSE	High	Master Protein	O00244	Copper transport protein ATOX1 [OS=Homo sapiens]	0	10.175	51	2	36	2	68	7.4	7.24	59.56	2	0	0	0.269	0.352215	90.81	167.2	32.8	72.33	28.43	Peak Found	High	High	High	High	High	High	High	High	High	1
TRUE	High	Master Protein	Q8NBF2	NHL repeat-containing protein 2 [OS=Homo sapiens]	0	10.173	6	3	14	3	726	79.4	5.55	28.66	3	0	0	0.169	4.89275e-06	100.55	168	32	16.12	45.57	Not Found	Peak Found	Peak Found	Peak Found	High	Not Found	High	High	High	High	1
FALSE	High	Master Protein	Q96PE7	Methylmalonyl-CoA epimerase, mitochondrial [OS=Homo sapiens]	0	10.17	20	2	6	2	176	18.7	9.09	24.31	2	0	0	1.193	0.794823	87.02	99.2	100.8	88.37	37.04	Not Found	High	High	Peak Found	Peak Found	Peak Found	High	High	High	High	1
FALSE	High	Master Protein	Q9BSJ2	Gamma-tubulin complex component 2 [OS=Homo sapiens]	0	10.167	3	2	9	2	902	102.5	6.84	23.26	2	0	0	0.694	0.956514	50.23	142.1	57.9	45.96	54.51	Not Found	Peak Found	High	High	High	Peak Found	High	High	High	High	1
FALSE	High	Master Protein	P61758	Prefoldin subunit 3 [OS=Homo sapiens]	0	10.152	10	1	10	1	197	22.6	7.11	39.39	1	0	0	0.744	0.785569	44.62	112.9	87.1	41.86	23.64	High	Peak Found	High	High	High	High	High	High	High	High	1
TRUE	High	Master Protein	P08240	Signal recognition particle receptor subunit alpha [OS=Homo sapiens]	0	10.146	5	2	9	2	638	69.8	8.95	26.98	2	0	0	0.211	0.0177323	80.2	167.2	32.8	34.46	64.83	High	High	High	High	Peak Found	High	High	High	Peak Found	Not Found	1
FALSE	High	Master Protein	Q96CS3	FAS-associated factor 2 [OS=Homo sapiens]	0	10.137	4	1	34	1	445	52.6	5.62	67.06	1	0	0	0.552	0.726672	79.51	113.4	86.6	56.99	63.72	Peak Found	High	High	High	High	High	High	High	High	High	1
FALSE	High	Master Protein	Q8IXJ6	NAD-dependent protein deacetylase sirtuin-2 [OS=Homo sapiens]	0	10.136	16	3	8	3	389	43.2	5.36	7.85	3	0	0	0.484	0.620151	125.39	161.8	38.2	76.32	84.56	High	High	High	High	Peak Found	Peak Found	Peak Found	High	Peak Found	High	1
FALSE	High	Master Protein	Q9BYD6	39S ribosomal protein L1, mitochondrial [OS=Homo sapiens]	0	10.117	19	3	5	3	325	36.9	8.78	12.43	3	0	0				127	73	14.34		Not Found	High	High	Not Found	High	Not Found	Not Found	High	Not Found	Not Found	1
FALSE	High	Master Protein	O14744	Protein arginine N-methyltransferase 5 [OS=Homo sapiens]	0	10.106	8	2	36	2	637	72.6	6.29	120.42	2	0	0	0.532	0.494506	93.32	144.3	55.7	52.18	73.12	Peak Found	High	High	High	High	Not Found	High	High	Peak Found	High	1
FALSE	High	Master Protein	P17252	Protein kinase C alpha type [OS=Homo sapiens]	0	10.085	5	2	19	2	672	76.7	7.05	45.37	2	0	0	1.648	0.547535	123.3	112.1	87.9	42.37	108.57	Not Found	High	High	High	High	Not Found	High	Peak Found	High	High	1
FALSE	High	Master Protein	Q9H488	GDP-fucose protein O-fucosyltransferase 1 [OS=Homo sapiens]	0	10.078	7	3	12	3	388	43.9	8.53	32.15	3	0	0	1.153	0.80585	107.12	109.8	90.2	88.65	47.31	Not Found	High	High	Peak Found	Peak Found	High	Peak Found	High	High	High	1
FALSE	High	Master Protein	P04921	Glycophorin-C [OS=Homo sapiens]	0	10.073	21	2	12	2	128	13.8	4.84	27.24	2	0	0	0.707	0.967044	111.54	82.7	117.3	100.96	80.09	High	High	High	High	Peak Found	Not Found	Peak Found	High	High	Peak Found	1
TRUE	High	Master Protein	Q93052	Lipoma-preferred partner [OS=Homo sapiens]	0	10.063	13	3	12	3	612	65.7	7.37	26.94	3	0	0	5.065	0.043686	83.44	13.1	186.9		85.87	Not Found	Not Found	Not Found	High	Not Found	High	High	High	High	Not Found	1
FALSE	High	Master Protein	Q9NPC6	Myozenin-2 [OS=Homo sapiens]	0	10.034	5	1	14	1	264	29.9	8.25	23.14	1	0	0	1.048	0.866632	108.09	88.1	111.9	41.25	87.65	Peak Found	High	Peak Found	High	High	Peak Found	High	High	High	High	1
FALSE	High	Master Protein	Q9Y570	Protein phosphatase methylesterase 1 [OS=Homo sapiens]	0	10.033	13	4	9	4	386	42.3	5.97	10.04	4	0	0	0.971	0.932695	75.41	127	73	36.12	43.57	Not Found	Not Found	High	High	High	Not Found	Peak Found	High	High	High	1
FALSE	High	Master Protein	O95168	NADH dehydrogenase [ubiquinone] 1 beta subcomplex subunit 4 [OS=Homo sapiens]	0	10.026	22	2	10	2	129	15.2	9.85	15.64	2	0	0	0.889	0.995521	129.91	111.2	88.8	94.46	169.64	High	High	Peak Found	Peak Found	Peak Found	High	High	High	High	Peak Found	1
FALSE	High	Master Protein	P13473	Lysosome-associated membrane glycoprotein 2 [OS=Homo sapiens]	0	10.024	9	3	38	3	410	44.9	5.63	41.47	3	0	0	1.129	0.773171	113.29	69.9	130.1	55.93	59.57	High	High	High	High	High	High	High	High	Peak Found	High	1
TRUE	High	Master Protein	O75116	Rho-associated protein kinase 2 [OS=Homo sapiens]	0	10.021	3	3	5	3	1388	160.8	6.02	9.56	3	0	0	9.677	0.052079	36.08	15.3	184.7		76.93	Not Found	Peak Found	Not Found	Not Found	Not Found	High	Peak Found	High	Not Found	Not Found	1
FALSE	High	Master Protein	Q9UBV2	Protein sel-1 homolog 1 [OS=Homo sapiens]	0	10.021	5	2	3	2	794	88.7	5.39	8.98	2	0	0	2.271	0.471269	80.87	56.9	143.1	93.57	42.5	Not Found	Peak Found	Not Found	Peak Found	Peak Found	Not Found	Peak Found	High	High	Peak Found	1
FALSE	High	Master Protein	O14545	TRAF-type zinc finger domain-containing protein 1 [OS=Homo sapiens]	0	10.02	6	3	9	3	582	64.8	5.29	8.36	3	0	0	0.45	0.474478	119.09	155.3	44.7	62.38	93.8	High	High	High	Peak Found	High	High	Peak Found	Peak Found	Peak Found	High	1
TRUE	High	Master Protein	Q9BYT8	Neurolysin, mitochondrial [OS=Homo sapiens]	0	9.99	8	3	4	3	704	80.6	6.64	4.48	3	0	0	100	5.5167e-17			200		28.4	Not Found	Not Found	Not Found	Not Found	High	Not Found	High	High	Not Found	High	1
FALSE	High	Master Protein	O15239	NADH dehydrogenase [ubiquinone] 1 alpha subcomplex subunit 1 [OS=Homo sapiens]	0	9.977	20	2	12	2	70	8.1	8.84	33.3	2	0	0	0.545	0.735473	114.12	125.1	74.9	43.43	116.64	Not Found	Peak Found	High	Peak Found	High	Peak Found	High	Peak Found	High	High	1
FALSE	High	Master Protein	Q8TCS8	Polyribonucleotide nucleotidyltransferase 1, mitochondrial [OS=Homo sapiens]	0	9.976	7	3	12	3	783	85.9	7.77	24.76	3	0	0	2.434	0.19971	107.71	107.1	92.9	46.95	136.33	Not Found	High	High	Peak Found	Peak Found	High	High	High	High	Not Found	1
FALSE	High	Master Protein	O95865	N(G),N(G)-dimethylarginine dimethylaminohydrolase 2 [OS=Homo sapiens]	0	9.954	18	3	13	2	285	29.6	6.01	34.24	3	0	0	1.013	0.882314	118.68	49	151	102.92	45.75	Not Found	High	Peak Found	High	High	Not Found	Peak Found	High	Peak Found	High	1
FALSE	High	Master Protein	P02792	Ferritin light chain [OS=Homo sapiens]	0	9.942	11	1	3	1	175	20	5.78	8.57	1	0	0	1.741	0.292285	34.57	73	127	27.82		Not Found	Peak Found	High	High	Not Found	Peak Found	Not Found	Not Found	Not Found	Not Found	1
TRUE	High	Master Protein	P40424	Pre-B-cell leukemia transcription factor 1 [OS=Homo sapiens]	0	9.941	7	2	4	2	430	46.6	7.03	11.22	2	0	0	100	5.5167e-17			200		84.96	Not Found	Not Found	Not Found	Not Found	Not Found	Peak Found	High	Peak Found	High	High	1
FALSE	High	Master Protein	Q08379	Golgin subfamily A member 2 [OS=Homo sapiens]	0	9.934	4	2	11	2	1002	113	5.02	27.72	2	0	0	0.634	0.913768	117.45	107.7	92.3	113.17	37.68	High	High	High	High	High	Not Found	High	High	High	High	1
TRUE	High	Master Protein	P61313	60S ribosomal protein L15 [OS=Homo sapiens]	0	9.924	13	2	15	2	204	24.1	11.62	36.43	2	0	0	2.076	0.0515678	88.49	65.4	134.6	80.53	31.1	High	High	High	High	High	High	High	High	High	High	1
TRUE	High	Master Protein	Q6QEF8	Coronin-6 [OS=Homo sapiens]	0	9.924	7	2	6	2	472	52.7	5.96	11.02	2	0	0	0.252	8.65532e-06	26.62	160.5	39.5	2.89	75.11	Not Found	High	High	Not Found	Peak Found	Peak Found	High	High	Not Found	High	1
TRUE	High	Master Protein	P61106	Ras-related protein Rab-14 [OS=Homo sapiens]	0	9.923	26	3	4	2	215	23.9	6.21	6.06	3	0	0	15.79	0.000556991	124.46	21.6	178.4	84.7	87.67	Not Found	Peak Found	Peak Found	Peak Found	Not Found	Not Found	Peak Found	High	Peak Found	Peak Found	1
FALSE	High	Master Protein	Q9BVC6	Transmembrane protein 109 [OS=Homo sapiens]	0	9.901	17	2	8	2	243	26.2	10.48	4.11	2	0	0	0.649	0.915592	88.8	117.5	82.5	129.82	147.74	Peak Found	High	High	Peak Found	High	High	High	High	Peak Found	High	1
FALSE	High	Master Protein	P55769	NHP2-like protein 1 [OS=Homo sapiens]	0	9.898	22	1	5	1	128	14.2	8.46	10.93	1	0	0	1.078	0.866632	70.42	88.1	111.9	80.52	32.16	Not Found	High	Peak Found	Peak Found	High	Peak Found	High	High	High	Peak Found	1
FALSE	High	Master Protein	O60610	Protein diaphanous homolog 1 [OS=Homo sapiens]	0	9.887	3	2	12	2	1272	141.3	5.41	26.08	2	0	0	0.903	0.975833	81.49	87.6	112.4	65.96	45.69	High	High	High	High	High	High	High	High	High	Peak Found	1
TRUE	High	Master Protein	Q07812	Apoptosis regulator BAX [OS=Homo sapiens]	0	9.881	7	2	3	2	192	21.2	5.22	8.12	2	0	0	100	5.5167e-17			200		139.9	Not Found	Not Found	Not Found	Not Found	Not Found	Not Found	Not Found	High	Not Found	Peak Found	1
FALSE	High	Master Protein	O00203	AP-3 complex subunit beta-1 [OS=Homo sapiens]	0	9.875	2	2	15	2	1094	121.2	6.04	34.81	2	0	0	0.638	0.932413	55.25	113.7	86.3	36.44	59.56	Not Found	High	High	High	High	High	High	High	High	High	1
FALSE	High	Master Protein	O00267	Transcription elongation factor SPT5 [OS=Homo sapiens]	0	9.872	5	3	9	3	1087	120.9	5.06	18.2	3	0	0	2.349	0.246085	103.5	57	143	68.92	72.42	High	Peak Found	High	Peak Found	High	Peak Found	High	High	Peak Found	High	1
FALSE	High	Master Protein	Q9BZL4	Protein phosphatase 1 regulatory subunit 12C [OS=Homo sapiens]	0	9.858	5	2	8	2	782	84.8	5.57	33.88	2	0	0	0.453	0.462762	34.95	137.6	62.4		32.45	Not Found	Not Found	High	High	High	Not Found	High	High	High	Not Found	1
FALSE	High	Master Protein	P51570	Galactokinase [OS=Homo sapiens]	0	9.851	18	4	4	4	392	42.2	6.46	11.03	4	0	0	1.064	0.851268	88.75	136.9	63.1	64.71	50.27	Not Found	Peak Found	High	Peak Found	Peak Found	Not Found	Peak Found	High	Not Found	Not Found	1
TRUE	High	Master Protein	P62269	40S ribosomal protein S18 [OS=Homo sapiens]	0	9.842	15	3	25	3	152	17.7	10.99	27.83	3	0	0	3.815	0.104764	137.11	43.3	156.7	87.49	164.82	Not Found	High	High	High	High	High	High	High	High	High	1
FALSE	High	Master Protein	Q12972	Nuclear inhibitor of protein phosphatase 1 [OS=Homo sapiens]	0	9.802	10	2	6	2	351	38.5	7.37	9.71	2	0	0	0.515	0.655975	52.58	122.4	77.6		19.59	Not Found	High	Not Found	High	High	Not Found	Not Found	High	Not Found	Peak Found	1
TRUE	High	Master Protein	Q9NS86	LanC-like protein 2 [OS=Homo sapiens]	0	9.754	12	3	10	3	450	50.8	7.43	24.12	3	0	0	10.369	0.00408144	0	105.7	94.3	119.38	56.17	Not Found	Peak Found	Peak Found	High	Not Found	High	High	High	High	High	1
TRUE	High	Master Protein	Q16543	Hsp90 co-chaperone Cdc37 [OS=Homo sapiens]	0	9.749	6	2	4	2	378	44.4	5.25	13.87	2	0	0	0.078	5.5167e-17	76.57	186.2	13.8	14.06	94.18	Not Found	High	Peak Found	High	Peak Found	Not Found	Peak Found	Peak Found	High	Not Found	1
TRUE	High	Master Protein	P05121	Plasminogen activator inhibitor 1 [OS=Homo sapiens]	0	9.743	9	2	2	2	402	45	7.2	2.83	2	0	0	0.01	5.5167e-17		200		90.96		Not Found	Not Found	Peak Found	Not Found	High	Not Found	Not Found	Not Found	Not Found	Not Found	1
FALSE	High	Master Protein	Q9H1Z4	WD repeat-containing protein 13 [OS=Homo sapiens]	0	9.74	11	2	5	2	485	53.7	9.14	12.53	2	0	0	0.34	0.37238	69	186.9	13.1	105.34	62.28	Not Found	Not Found	High	Not Found	High	Not Found	Peak Found	Peak Found	High	Peak Found	1
FALSE	High	Master Protein	P50897	Palmitoyl-protein thioesterase 1 [OS=Homo sapiens]	0	9.732	12	2	7	2	306	34.2	6.52	22.86	2	0	0	0.623	0.826086	89.3	115	85	63.25	5.13	High	High	High	High	Peak Found	Not Found	Not Found	High	High	Peak Found	1
TRUE	High	Master Protein	P82675	28S ribosomal protein S5, mitochondrial [OS=Homo sapiens]	0	9.725	10	2	5	2	430	48	9.92	17.46	2	0	0	7.717	0.0696975	0	22.9	177.1			Not Found	Not Found	Not Found	High	Peak Found	Not Found	High	Not Found	High	High	1
FALSE	High	Master Protein	Q9Y2S7	Polymerase delta-interacting protein 2 [OS=Homo sapiens]	0	9.704	11	2	6	2	368	42	8.63	13.95	2	0	0	0.377	0.302322	115.62	124.6	75.4	18.77	54.28	Not Found	High	High	Peak Found	High	Peak Found	Peak Found	Peak Found	Peak Found	High	1
FALSE	High	Master Protein	P67870	Casein kinase II subunit beta [OS=Homo sapiens]	0	9.7	14	2	25	2	215	24.9	5.55	71.86	2	0	0	0.437	0.182412	121.75	162.6	37.4	64.88	78.97	Peak Found	High	High	High	High	Peak Found	High	High	High	High	1
TRUE	High	Master Protein	O43854	EGF-like repeat and discoidin I-like domain-containing protein 3 [OS=Homo sapiens]	0	9.695	10	2	4	2	480	53.7	7.28	14.49	2	0	0	0.121	0.000220452	45.26	169.4	30.6	41.29		Not Found	High	Not Found	High	Not Found	Not Found	Not Found	High	Not Found	Not Found	1
FALSE	High	Master Protein	Q9BRX8	Peroxiredoxin-like 2A [OS=Homo sapiens]	0	9.681	10	2	13	2	229	25.7	8.84	30.08	2	0	0	1.201	0.718364	69.39	106.2	93.8	81.89	65.4	Not Found	High	Peak Found	High	High	Not Found	High	High	High	High	1
FALSE	High	Master Protein	O43598	2'-deoxynucleoside 5'-phosphate N-hydrolase 1 [OS=Homo sapiens]	0	9.675	18	2	24	2	174	19.1	5.05	44.5	2	0	0	0.617	0.818934	100.79	126.2	73.8	64.02	36.08	Peak Found	High	High	High	High	Peak Found	Peak Found	High	High	High	1
FALSE	High	Master Protein	P30876	DNA-directed RNA polymerase II subunit RPB2 [OS=Homo sapiens]	0	9.672	4	3	5	3	1174	133.8	6.87	11.78	3	0	0	1.785	0.503445	136.83	78.2	121.8	21.73	77.58	Not Found	Peak Found	High	High	Not Found	Peak Found	Not Found	High	Peak Found	High	1
FALSE	High	Master Protein	O75935	Dynactin subunit 3 [OS=Homo sapiens]	0	9.636	11	1	29	1	186	21.1	5.47	78.04	1	0	0	1.305	0.748253	71.48	86.8	113.2	83.53	108.47	Not Found	High	Peak Found	High	High	Not Found	High	High	High	High	1
FALSE	High	Master Protein	P35659	Protein DEK [OS=Homo sapiens]	0	9.627	7	2	16	2	375	42.6	8.56	29.73	2	0	0	1.382	0.67721	133.19	84	116	68.42	121.99	Not Found	High	High	High	High	Not Found	High	High	Peak Found	Not Found	1
FALSE	High	Master Protein	Q15031	Leucine--tRNA ligase, mitochondrial [OS=Homo sapiens]	0	9.593	4	2	6	2	903	101.9	8.22	15.47	2	0	0	1.176	0.804769	45.42	134.1	65.9	104.27	44.8	Peak Found	High	High	Peak Found	High	Not Found	High	Not Found	Peak Found	High	1
TRUE	High	Master Protein	P42285	Exosome RNA helicase MTR4 [OS=Homo sapiens]	0	9.593	2	1	3	1	1042	117.7	6.52	7.57	1	0	0	0.01	5.5167e-17		200		132.65		High	Not Found	Not Found	Peak Found	Not Found	Not Found	Not Found	High	Not Found	Not Found	1
TRUE	High	Master Protein	P37837	Transaldolase [OS=Homo sapiens]	0	9.592	10	3	6	3	337	37.5	6.81	14.25	3	0	0	46.2	5.5167e-17	89.78	2	198	45.57	42.78	Not Found	Peak Found	Not Found	Not Found	Peak Found	High	High	High	High	Peak Found	1
FALSE	High	Master Protein	Q7Z417	FMR1-interacting protein NUFIP2 [OS=Homo sapiens]	0	9.585	6	2	2	2	695	76.1	8.7	7.59	2	0	0				95.2	104.8	116.39		Not Found	Not Found	Not Found	High	Peak Found	Not Found	Not Found	High	Not Found	Not Found	1
TRUE	High	Master Protein	Q15020	Squamous cell carcinoma antigen recognized by T-cells 3 [OS=Homo sapiens]	0	9.559	6	4	4	4	963	109.9	5.57	8.85	4	0	0	22.064	2.43618e-05	0	36.8	163.2	87.73		Not Found	Peak Found	Not Found	Peak Found	High	Not Found	Not Found	High	Not Found	Not Found	1
TRUE	High	Master Protein	Q6DKK2	Tetratricopeptide repeat protein 19, mitochondrial [OS=Homo sapiens]	0	9.554	12	3	4	3	380	42.4	5.77	6.31	3	0	0	100	5.5167e-17			200			Not Found	Not Found	Not Found	Not Found	Not Found	High	High	High	Not Found	Not Found	1
FALSE	High	Master Protein	P50336	Protoporphyrinogen oxidase [OS=Homo sapiens]	0	9.551	10	2	8	2	477	50.7	8.16	22.2	2	0	0	0.587	0.790123	76.49	144.2	55.8	65.93	19.26	Not Found	High	High	Peak Found	High	High	High	Peak Found	High	High	1
FALSE	High	Master Protein	P15848	Arylsulfatase B [OS=Homo sapiens]	0	9.532	5	2	13	2	533	59.6	8.21	35.94	2	0	0	0.596	0.838137	105.52	88.4	111.6	90.35	61.72	High	High	Peak Found	High	Peak Found	Not Found	High	High	High	Not Found	1
TRUE	High	Master Protein	Q9H6K4	Optic atrophy 3 protein [OS=Homo sapiens]	0	9.529	28	2	5	2	179	20	8.91	7.06	2	0	0	100	5.5167e-17			200			Not Found	Not Found	High	Not Found	Not Found	High	High	High	Not Found	Not Found	1
FALSE	High	Master Protein	Q9BXK5	Bcl-2-like protein 13 [OS=Homo sapiens]	0	9.515	8	2	2	2	485	52.7	4.44	7.53	2	0	0	2.242	0.804724	478.73	84.6	115.4	160.49	139.37	Not Found	Peak Found	Peak Found	High	Not Found	Not Found	Not Found	High	Not Found	Peak Found	1
FALSE	High	Master Protein	P48556	26S proteasome non-ATPase regulatory subunit 8 [OS=Homo sapiens]	0	9.515	10	3	6	3	350	39.6	9.7	9.32	3	0	0	0.902	0.98526	144.07	24.3	175.7	156.95	114.8	Not Found	Not Found	Peak Found	Peak Found	High	Peak Found	Peak Found	High	Peak Found	High	1
FALSE	High	Master Protein	Q96K17	Transcription factor BTF3 homolog 4 [OS=Homo sapiens]	0	9.51	16	1	33	1	158	17.3	6.35	110.11	1	0	0	0.674	0.852347	94.16	129.1	70.9	98.5	86.5	Not Found	High	High	High	Not Found	Not Found	High	High	High	Not Found	1
FALSE	High	Master Protein	O75208	Ubiquinone biosynthesis protein COQ9, mitochondrial [OS=Homo sapiens]	0	9.502	11	2	18	2	318	35.5	5.94	41.14	2	0	0	0.455	0.173401	90.24	100.4	99.6	39.48	28.05	Peak Found	High	High	High	High	Not Found	Peak Found	High	High	High	1
TRUE	High	Master Protein	Q9NRP2	COX assembly mitochondrial protein 2 homolog [OS=Homo sapiens]	0	9.485	28	1	4	1	79	9.5	7.87	9.29	1	0	0	0.168	0.00556114	57.39	167	33	36.57	120.25	Not Found	High	High	Peak Found	Peak Found	Peak Found	Peak Found	Not Found	High	Peak Found	1
FALSE	High	Master Protein	Q86U06	Probable RNA-binding protein 23 [OS=Homo sapiens]	0	9.483	6	2	12	2	439	48.7	9.85	27.67	2	0	0	0.366	0.314774	96.93	147	53	29.04	106.42	Not Found	High	High	Peak Found	High	High	Peak Found	High	High	Peak Found	1
FALSE	High	Master Protein	Q02809	Procollagen-lysine,2-oxoglutarate 5-dioxygenase 1 [OS=Homo sapiens]	0	9.449	7	3	10	3	727	83.5	6.95	14.1	3	0	0	0.862	0.952794	138.16	95.1	104.9	125.8	46.11	Not Found	Peak Found	Peak Found	High	Peak Found	Not Found	High	High	Not Found	High	1
FALSE	High	Master Protein	P08648	Integrin alpha-5 [OS=Homo sapiens]	0	9.449	5	3	9	3	1049	114.5	5.77	20.35	3	0	0	1.475	0.636438	103	80.8	119.2	86.28	48.57	Peak Found	Peak Found	High	High	High	Not Found	Peak Found	High	High	High	1
FALSE	High	Master Protein	Q9H3P7	Golgi resident protein GCP60 [OS=Homo sapiens]	0	9.445	7	1	7	1	528	60.6	5.06	22.1	1	0	0	0.841	0.982667	59.52	108.7	91.3	74.95	32.7	High	High	High	High	Not Found	Not Found	High	Not Found	High	High	1
FALSE	High	Master Protein	P53367	Arfaptin-1 [OS=Homo sapiens]	0	9.444	14	3	12	3	373	41.7	6.7	13.28	3	0	0	2.072	0.622681	54.15	85.1	114.9	61.12	91.85	High	High	High	Peak Found	Peak Found	High	Peak Found	High	Not Found	Not Found	1
FALSE	High	Master Protein	Q9H078	Caseinolytic peptidase B protein homolog [OS=Homo sapiens]	0	9.439	5	2	5	2	707	78.7	9.01	18.06	2	0	0	1.104	0.825043	10.59	96.5	103.5	102.73	78.17	Not Found	High	High	Peak Found	High	Not Found	High	High	Not Found	Peak Found	1
TRUE	High	Master Protein	Q9UBS4	DnaJ homolog subfamily B member 11 [OS=Homo sapiens]	0	9.439	9	3	5	3	358	40.5	6.18	5.4	3	0	0	12.408	0.000120889	130.79	22.3	177.7	88.24	74.51	Not Found	Not Found	Not Found	High	Peak Found	Not Found	High	High	Peak Found	High	1
FALSE	High	Master Protein	O96000	NADH dehydrogenase [ubiquinone] 1 beta subcomplex subunit 10 [OS=Homo sapiens]	0	9.436	26	3	24	3	172	20.8	8.48	14.8	3	0	0	1.348	0.60861	107.32	93.4	106.6	77.51	49.35	Not Found	High	High	High	Peak Found	High	Peak Found	High	High	High	1
FALSE	High	Master Protein	P03891	NADH-ubiquinone oxidoreductase chain 2 [OS=Homo sapiens]	0	9.436	20	3	16	3	347	38.9	9.83	34.36	3	0	0	2.661	0.277606	179.92	54.6	145.4	91.7	132.17	Not Found	Not Found	High	Peak Found	High	Not Found	High	High	Not Found	High	1
FALSE	High	Master Protein	Q96FV2	Secernin-2 [OS=Homo sapiens]	0	9.407	11	2	24	2	425	46.6	5.67	57.79	2	0	0	1.327	0.609793	70.6	83.8	116.2	48.36	43.65	Not Found	High	High	High	High	Not Found	High	High	High	High	1
FALSE	High	Master Protein	P23588	Eukaryotic translation initiation factor 4B [OS=Homo sapiens]	0	9.379	3	1	7	1	611	69.1	5.73	23.74	1	0	0	0.937	0.931642	112.63	103.3	96.7	82.42	57	High	High	Peak Found	High	Peak Found	High	High	High	High	Peak Found	1
FALSE	High	Master Protein	Q9Y6B6	GTP-binding protein SAR1b [OS=Homo sapiens]	0	9.379	14	2	12	1	198	22.4	6.11	43.71	2	0	0	0.635	0.785139	57.26	120.3	79.7	48.46	28.43	Not Found	High	High	High	High	High	High	High	High	High	1
TRUE	High	Master Protein	P22087	rRNA 2'-O-methyltransferase fibrillarin [OS=Homo sapiens]	0	9.377	9	2	4	2	321	33.8	10.18	7.76	2	0	0	5.413	0.0183552	193.54	8.6	191.4	112.27		Not Found	Peak Found	Not Found	High	Not Found	Not Found	Not Found	High	Not Found	Not Found	1
FALSE	High	Master Protein	O75688	Protein phosphatase 1B [OS=Homo sapiens]	0	9.361	7	2	10	1	479	52.6	5.05	26	2	0	0	0.811	0.996579	57.08	110.1	89.9	49.64	34.35	Not Found	Peak Found	High	Peak Found	High	High	Peak Found	High	High	High	1
TRUE	High	Master Protein	O95359	Transforming acidic coiled-coil-containing protein 2 [OS=Homo sapiens]	0	9.35	1	2	4	2	2948	309.2	4.79	14.5	2	0	0	0.01	5.5167e-17		200		121.22		Not Found	High	Peak Found	Not Found	High	Not Found	Not Found	High	Not Found	High	1
FALSE	High	Master Protein	Q9Y276	Mitochondrial chaperone BCS1 [OS=Homo sapiens]	0	9.342	9	2	5	2	419	47.5	8.5	14.49	2	0	0	0.71	0.752828	50.25	113.9	86.1	56.9	30.6	Not Found	High	Peak Found	Peak Found	High	Not Found	Peak Found	High	Peak Found	High	1
FALSE	High	Master Protein	Q9NQE9	Adenosine 5'-monophosphoramidase HINT3 [OS=Homo sapiens]	0	9.342	18	2	14	2	182	20.3	6.6	34.66	2	0	0	0.961	0.926687	125.18	84.7	115.3	61.24	87.29	Peak Found	High	Peak Found	High	Not Found	High	High	High	High	Not Found	1
TRUE	High	Master Protein	Q2TAA2	Isoamyl acetate-hydrolyzing esterase 1 homolog [OS=Homo sapiens]	0	9.332	17	2	2	2	248	27.6	5.3	6.38	2	0	0	100	5.5167e-17			200		36.04	Not Found	Not Found	Not Found	Not Found	Not Found	Not Found	Not Found	High	Not Found	Peak Found	1
TRUE	High	Master Protein	Q9UGV2	Protein NDRG3 [OS=Homo sapiens]	0	9.331	10	2	5	2	375	41.4	5.31	4.8	2	0	0	0.033	2.23567e-08	76.35	147.5	52.5	97.51		Peak Found	High	High	Peak Found	High	Not Found	Not Found	High	Not Found	Not Found	1
FALSE	High	Master Protein	Q15185	Prostaglandin E synthase 3 [OS=Homo sapiens]	0	9.327	19	2	10	2	160	18.7	4.54	16.79	2	0	0	0.424	0.420943	116.2	135.7	64.3	140.37	104.5	Not Found	High	High	High	High	Peak Found	Peak Found	Peak Found	Peak Found	High	1
FALSE	High	Master Protein	Q99436	Proteasome subunit beta type-7 [OS=Homo sapiens]	0	9.316	14	2	12	2	277	29.9	7.68	44.03	2	0	0	1.152	0.712756	36.96	92.2	107.8	20.37	26.35	High	High	High	High	Peak Found	High	High	High	High	High	1
FALSE	High	Master Protein	Q6ZT12	E3 ubiquitin-protein ligase UBR3 [OS=Homo sapiens]	0	9.311	2	3	10	3	1888	212.3	6.1	13.96	3	0	0	0.827	0.97247	57.45	115.6	84.4	49.23	51.58	Not Found	High	Peak Found	High	High	High	High	High	High	Peak Found	1
FALSE	High	Master Protein	Q15257	Serine/threonine-protein phosphatase 2A activator [OS=Homo sapiens]	0	9.31	9	2	9	2	358	40.6	5.94	26.34	2	0	0	0.374	0.210776	111.2	139.8	60.2	76.74	50.89	Peak Found	High	Peak Found	High	High	Peak Found	High	High	Peak Found	High	1
TRUE	High	Master Protein	Q96TC7	Regulator of microtubule dynamics protein 3 [OS=Homo sapiens]	0	9.293	7	2	3	2	470	52.1	5.1	9.18	2	0	0	41.516	3.04377e-05	0	5	195		115.9	Not Found	Peak Found	Not Found	Not Found	Not Found	Peak Found	Not Found	High	Not Found	High	1
FALSE	High	Master Protein	O15498	Synaptobrevin homolog YKT6 [OS=Homo sapiens]	0	9.258	12	2	12	2	198	22.4	6.92	28.42	2	0	0	0.612	0.918299	76.82	118.4	81.6	84.81	50.75	Not Found	High	Peak Found	High	Not Found	High	Peak Found	High	High	High	1
TRUE	High	Master Protein	Q15233	Non-POU domain-containing octamer-binding protein [OS=Homo sapiens]	0	9.254	7	2	21	2	471	54.2	8.95	61.69	2	0	0	0.332	0.0282353	77.64	148.1	51.9	53.99	44.31	High	High	High	Peak Found	High	High	High	High	High	High	1
FALSE	High	Master Protein	Q15942	Zyxin [OS=Homo sapiens]	0	9.228	8	2	5	2	572	61.2	6.67	12.95	2	0	0	1.283	0.73663	66.95	78	122	76.88	15.68	Not Found	Peak Found	High	Peak Found	High	Peak Found	Not Found	High	Not Found	Peak Found	1
FALSE	High	Master Protein	Q00765	Receptor expression-enhancing protein 5 [OS=Homo sapiens]	0	9.221	11	1	4	1	189	21.5	8.1	12.71	1	0	0	0.365	0.454975	122.24	146.5	53.5	49.16	108.08	Not Found	High	Not Found	High	Not Found	Not Found	Peak Found	Not Found	High	Not Found	1
FALSE	High	Master Protein	O96013	Serine/threonine-protein kinase PAK 4 [OS=Homo sapiens]	0	9.221	5	2	7	2	591	64	9.73	22.4	2	0	0	0.414	0.530933	114.76	141.4	58.6	60.29	107.85	Peak Found	Peak Found	High	High	High	Peak Found	High	High	Peak Found	High	1
FALSE	High	Master Protein	P78324	Tyrosine-protein phosphatase non-receptor type substrate 1 [OS=Homo sapiens]	0	9.221	10	3	6	3	504	54.9	6.98	11.82	3	0	0	0.945	0.958863	76.59	101.8	98.2	65.07	126.34	Not Found	Peak Found	High	Peak Found	Peak Found	Not Found	Peak Found	High	Not Found	Not Found	1
FALSE	High	Master Protein	P06132	Uroporphyrinogen decarboxylase [OS=Homo sapiens]	0	9.216	6	1	6	1	367	40.8	6.14	28.21	1	0	0	0.691	0.892772	93.49	98.2	101.8	65.37	76.87	Not Found	High	High	High	Peak Found	Not Found	High	High	Peak Found	High	1
FALSE	High	Master Protein	Q9UBB6	Neurochondrin [OS=Homo sapiens]	0	9.174	6	3	3	3	729	78.8	5.48	6.89	3	0	0				163.4	36.6			Not Found	Not Found	Not Found	Not Found	High	Not Found	High	High	Not Found	Not Found	1
FALSE	High	Master Protein	Q9UQ13	Leucine-rich repeat protein SHOC-2 [OS=Homo sapiens]	0	9.172	4	1	8	1	582	64.8	8.46	28.25	1	0	0	0.951	0.937922	82.44	102.5	97.5	69.22	1.31	Not Found	High	Not Found	High	High	Not Found	High	High	High	High	1
TRUE	High	Master Protein	Q9UK45	U6 snRNA-associated Sm-like protein LSm7 [OS=Homo sapiens]	0	9.166	24	1	8	1	103	11.6	5.27	31.26	1	0	0	0.158	2.58931e-07	0	172.7	27.3			Peak Found	High	High	High	High	Not Found	High	High	High	High	1
FALSE	High	Master Protein	Q99567	Nuclear pore complex protein Nup88 [OS=Homo sapiens]	0	9.164	4	1	3	1	741	83.5	5.69	10.69	1	0	0	0.387	0.503329	44.64	144.2	55.8		40.78	Not Found	High	Not Found	Not Found	High	Not Found	Not Found	Peak Found	Not Found	High	1
FALSE	High	Master Protein	P56556	NADH dehydrogenase [ubiquinone] 1 alpha subcomplex subunit 6 [OS=Homo sapiens]	0	9.163	19	2	39	2	128	15.1	9.98	103.16	2	0	0	0.903	0.988239	92.39	105.3	94.7	55.36	77.01	High	High	Peak Found	High	High	Peak Found	High	High	High	High	1
TRUE	High	Master Protein	P62310	U6 snRNA-associated Sm-like protein LSm3 [OS=Homo sapiens]	0	9.159	45	2	5	2	102	11.8	4.7	12.7	2	0	0	100	5.5167e-17			200			Not Found	Not Found	High	High	Not Found	Not Found	High	High	High	Not Found	1
FALSE	High	Master Protein	Q9BY77	Polymerase delta-interacting protein 3 [OS=Homo sapiens]	0	9.151	9	2	4	2	421	46.1	9.99	8.69	2	0	0	0.838	0.98734	114.02	94.8	105.2	89.57	78.08	Not Found	High	Not Found	Peak Found	High	Peak Found	Not Found	High	Peak Found	Peak Found	1
TRUE	High	Master Protein	Q9HCU5	Prolactin regulatory element-binding protein [OS=Homo sapiens]	0	9.148	9	2	8	2	417	45.4	7.88	18.88	2	0	0	0.387	0.0383292	102.17	170.4	29.6	66.92	116.2	Not Found	High	High	Not Found	Peak Found	Not Found	High	High	High	High	1
FALSE	High	Master Protein	Q86X55	Histone-arginine methyltransferase CARM1 [OS=Homo sapiens]	0	9.107	6	2	7	2	608	65.8	6.73	18.57	2	0	0	0.572	0.750605	80.03	179.2	20.8	137.75	54.42	Not Found	High	High	Peak Found	High	Not Found	High	Not Found	Peak Found	High	1
FALSE	High	Master Protein	Q9UPN7	Serine/threonine-protein phosphatase 6 regulatory subunit 1 [OS=Homo sapiens]	0	9.079	7	3	7	3	881	96.7	4.55	17.73	3	0	0	0.403	0.510074	85.46	181.9	18.1	113.09	93.16	Peak Found	Peak Found	Peak Found	Peak Found	High	Not Found	Not Found	High	High	High	1
FALSE	High	Master Protein	Q04323	UBX domain-containing protein 1 [OS=Homo sapiens]	0	9.066	9	1	5	1	297	33.3	5.25	16.38	1	0	0	0.865	0.980195	65.15	108.3	91.7	38.08	114.77	Not Found	Peak Found	High	High	Peak Found	Not Found	High	Peak Found	Peak Found	High	1
FALSE	High	Master Protein	Q9UPY8	Microtubule-associated protein RP/EB family member 3 [OS=Homo sapiens]	0	9.061	14	2	3	2	281	32	5.54	10.12	2	0	0	1.792	0.216189	26.9	78.6	121.4	56.53		Not Found	Peak Found	Peak Found	High	High	Peak Found	Not Found	Not Found	Not Found	Not Found	1
FALSE	High	Master Protein	Q9Y4J8	Dystrobrevin alpha [OS=Homo sapiens]	0	9.051	6	2	9	2	743	83.8	6.89	17.86	2	0	0	1.003	0.918299	106.21	93.4	106.6	39.93	85.82	Not Found	Peak Found	High	High	High	Not Found	High	High	High	High	1
TRUE	High	Master Protein	P17900	Ganglioside GM2 activator [OS=Homo sapiens]	0	9.041	15	2	2	2	193	20.8	5.31	5.54	2	0	0	34.741	3.81377e-08	26.17	1.5	198.5	24.58		Not Found	Peak Found	Not Found	Not Found	Peak Found	Not Found	Not Found	High	Not Found	Not Found	1
FALSE	High	Master Protein	P61088	Ubiquitin-conjugating enzyme E2 N [OS=Homo sapiens]	0	9.003	13	1	54	1	152	17.1	6.57	158.34	1	0	0	0.773	0.926386	104.51	124.3	75.7	113.36	103.74	High	High	High	High	High	High	High	High	High	High	1
TRUE	High	Master Protein	Q8IYB8	ATP-dependent RNA helicase SUPV3L1, mitochondrial [OS=Homo sapiens]	0	8.97	6	2	6	2	786	87.9	7.99	5.79	2	0	0	100	5.5167e-17			200		59.03	Not Found	Not Found	High	High	Not Found	High	Not Found	High	Not Found	High	1
TRUE	High	Master Protein	Q96F07	Cytoplasmic FMR1-interacting protein 2 [OS=Homo sapiens]	0	8.967	2	2	5	1	1278	148.3	7.31	9.21	2	0	0	0.12	0.00744378	27.28	178.6	21.4	26.12		Peak Found	Peak Found	Not Found	High	Not Found	Not Found	Not Found	Peak Found	Not Found	Not Found	1
FALSE	High	Master Protein	P30711	Glutathione S-transferase theta-1 [OS=Homo sapiens]	0	8.957	9	2	4	2	240	27.3	7.49	13.14	2	0	0	0.813	0.981508	69.4	115.4	84.6	51.78	64.18	Peak Found	High	Peak Found	Peak Found	High	Not Found	Peak Found	Peak Found	Peak Found	High	1
TRUE	High	Master Protein	Q6KB66	Keratin, type II cytoskeletal 80 [OS=Homo sapiens]	0	8.956	4	2	233	1	452	50.5	5.67	668.7	2	0	0	23.254	0.00173541	0	8.2	191.8			Not Found	Not Found	Not Found	Peak Found	Not Found	Not Found	Not Found	High	Not Found	Not Found	1
FALSE	High	Master Protein	O95563	Mitochondrial pyruvate carrier 2 [OS=Homo sapiens]	0	8.951	13	1	7	1	127	14.3	10.43	19.53	1	0	0				45.1	154.9	88.97	130.77	Not Found	Peak Found	Not Found	High	Not Found	Not Found	Not Found	Peak Found	Not Found	High	1
FALSE	High	Master Protein	Q92542	Nicastrin [OS=Homo sapiens]	0	8.936	3	1	5	1	709	78.4	5.99	16.94	1	0	0	1.116	0.823512	58.86	87.9	112.1	24.81	77.25	Not Found	High	Peak Found	Not Found	High	Not Found	High	High	Peak Found	High	1
TRUE	High	Master Protein	Q16595	Frataxin, mitochondrial [OS=Homo sapiens]	0	8.909	10	1	1	1	210	23.1	8.69	4.31	1	0	0	0.01	5.5167e-17		200		34.02		Not Found	Peak Found	High	Not Found	Peak Found	Not Found	Not Found	Not Found	Not Found	Not Found	1
FALSE	High	Master Protein	P49585	Choline-phosphate cytidylyltransferase A [OS=Homo sapiens]	0	8.906	11	2	5	2	367	41.7	7.25	14.19	2	0	0	0.554	0.815997	82.21	36	164	44.32	106.76	Not Found	Peak Found	Peak Found	Peak Found	High	Not Found	High	High	Peak Found	Peak Found	1
FALSE	High	Master Protein	O95819	Mitogen-activated protein kinase kinase kinase kinase 4 [OS=Homo sapiens]	0	8.904	2	3	7	3	1239	142	7.46	15.33	3	0	0	1.433	0.792188	66.47	68.5	131.5	56.52	39.29	Not Found	Peak Found	Not Found	Peak Found	High	Not Found	High	High	High	High	1
FALSE	High	Master Protein	Q9BTZ2	Dehydrogenase/reductase SDR family member 4 [OS=Homo sapiens]	0	8.89	16	2	5	2	278	29.5	8.56	17.81	2	0	0	1.104	0.835614	0	182	18	8.44		Not Found	High	High	Peak Found	High	Not Found	Not Found	Not Found	Not Found	High	1
TRUE	High	Master Protein	Q14247	Src substrate cortactin [OS=Homo sapiens]	0	8.885	13	3	6	3	550	61.5	5.4	10.28	3	0	0	5.34	0.0114751	24.01	24.3	175.7	29.14		Not Found	High	High	Peak Found	Peak Found	High	Not Found	High	Not Found	Not Found	1
FALSE	High	Master Protein	Q15526	Surfeit locus protein 1 [OS=Homo sapiens]	0	8.868	9	1	14	1	300	33.3	9.6	47.56	1	0	0	0.562	0.879619	127.24	123.6	76.4	42.86	113.68	High	High	High	High	Not Found	Not Found	High	Peak Found	High	High	1
FALSE	High	Master Protein	P40429	60S ribosomal protein L13a [OS=Homo sapiens]	0	8.865	9	2	25	2	203	23.6	10.93	35.91	2	0	0	0.875	0.945547	133.85	117.3	82.7	61	159.36	Not Found	High	High	Peak Found	High	Not Found	High	High	High	High	1
FALSE	High	Master Protein	P41091	Eukaryotic translation initiation factor 2 subunit 3 [OS=Homo sapiens]	0	8.843	9	3	3	3	472	51.1	8.4	5.4	3	0	0	0.761	0.996579	0	106.1	93.9		21.04	Not Found	Not Found	Not Found	Not Found	High	Not Found	Not Found	High	Not Found	Peak Found	1
FALSE	High	Master Protein	Q6ZXV5	Protein O-mannosyl-transferase TMTC3 [OS=Homo sapiens]	0	8.839	2	1	4	1	915	103.9	8.87	14.19	1	0	0	0.825	0.996803	37.26	103.9	96.1	17.3	32.98	Not Found	Peak Found	High	Not Found	Peak Found	Peak Found	High	High	High	Peak Found	1
FALSE	High	Master Protein	Q9H0U6	39S ribosomal protein L18, mitochondrial [OS=Homo sapiens]	0	8.825	13	1	6	1	180	20.6	9.54	17.7	1	0	0	0.506	0.660153	116.98	158.8	41.2	57.69	90.42	Not Found	High	High	Not Found	High	Not Found	High	Peak Found	Peak Found	High	1
FALSE	High	Master Protein	O95834	Echinoderm microtubule-associated protein-like 2 [OS=Homo sapiens]	0	8.774	7	2	2	2	649	70.6	6.32	7.48	2	0	0	0.629	0.850517	110.83	122.8	77.2	70.96	115.8	Not Found	Not Found	Peak Found	Peak Found	High	Not Found	Peak Found	Peak Found	High	Peak Found	1
FALSE	High	Master Protein	Q96BJ3	Axin interactor, dorsalization-associated protein [OS=Homo sapiens]	0	8.764	7	1	9	1	306	35	6.55	31.8	1	0	0	0.742	0.983465	58.12	113.3	86.7	78.83	37.68	Not Found	High	High	High	High	High	High	High	High	High	1
FALSE	High	Master Protein	O00399	Dynactin subunit 6 [OS=Homo sapiens]	0	8.758	17	2	7	2	190	20.7	6.32	18.96	2	0	0	0.365	0.539405	83.89	163.3	36.7	30.35	94.35	Not Found	High	High	High	Not Found	Not Found	High	High	Peak Found	Not Found	1
FALSE	High	Master Protein	Q9P035	Very-long-chain (3R)-3-hydroxyacyl-CoA dehydratase 3 [OS=Homo sapiens]	0	8.751	6	1	4	1	362	43.1	8.94	16.36	1	0	0	1.39	0.487507	101.08	72.3	127.7	100.42	36.4	Peak Found	High	Peak Found	High	Not Found	Peak Found	Peak Found	Not Found	High	High	1
TRUE	High	Master Protein	Q14696	LRP chaperone MESD [OS=Homo sapiens]	0	8.749	9	1	10	1	234	26.1	7.78	32.17	1	0	0	0.407	0.102077	82.84	143.6	56.4	49.29	79.12	Not Found	High	High	High	High	Not Found	High	High	Peak Found	High	1
FALSE	High	Master Protein	Q9UHL4	Dipeptidyl peptidase 2 [OS=Homo sapiens]	0	8.746	9	2	4	2	492	54.3	6.32	12.18	2	0	0	0.59	0.8789	164.79	139.8	60.2	96.24	147.12	High	Peak Found	Peak Found	High	Peak Found	Not Found	High	Peak Found	Peak Found	Not Found	1
[truncated: 1,273 more rows]

## Sheet: HumanEHTVennList
Human LA	Std Pacing	Human LA|Std Pacing
K7ES11	P13533	Q16401
A0A0B4J259	Q16658	P14550
F8VV32	Q3ZCM7	P16157
Q01970	P62136	Q9NZ45
I3L0W5	P60842	P01024
F8WEB6	P54578	Q86YQ8
A2IDB1	Q8NBX0	P07099
Q02218	O75923	P98095
[truncated: 1,543 more rows]

## Sheet: Venn GoTerms BP
Category	Term	RT	Count	%	P-Value	Benjamini
[truncated: 17 more rows]
