# Supplementary material for: Atrial Fibrillation Induces Sarcomere Remodeling, Enhanced Sarcomere Contractility, and Loss of Atrial Identity
Source: Research Square preprint supplement (doi:10.21203/rs.3.rs-6422874/v1), 2025-04-23
Supplement: Supplementary file 2 [file 04f967436a961c436204cdfd.xlsx]

## Sheet: AF vs NSR
Checked	Protein FDR Confidence: Combined	Master	Accession	Description	Exp. q-value: Combined	Sum PEP Score	Coverage [%]	# Peptides	# PSMs	# Unique Peptides	# AAs	MW [kDa]	calc. pI	Score Sequest HT: Sequest HT	# Peptides (by Search Engine): Sequest HT	Biological Process	Cellular Component	Molecular Function	Pfam IDs	Entrez Gene ID	Ensembl Gene ID	Gene Symbol	Gene ID	WikiPathways	Reactome Pathways	# Protein Pathway Groups	# Razor Peptides	Abundance Ratio: (AF) / (SR)	Abundance Ratio P-Value: (AF) / (SR)	Abundance Ratio Adj. P-Value: (AF) / (SR)	Abundance Ratio Variability [%]: (AF) / (SR)	Abundances (Grouped): AF	Abundances (Grouped): SR	Abundances (Grouped) CV [%]: AF	Abundances (Grouped) CV [%]: SR	Found in Sample: [S4] F4: Sample, AF	Found in Sample: [S5] F5: Sample, AF	Found in Sample: [S6] F6: Sample, AF	Found in Sample: [S1] F1: Control, SR	Found in Sample: [S2] F2: Control, SR	Found in Sample: [S3] F3: Control, SR	# Protein Groups	Modifications
FALSE	High	Master Protein	P02768	Albumin [OS=Homo sapiens]	0	991.08	84	72	13262	72	609	69.3	6.28	37359	72	stress response;other biological processes	non-structural extracellular;ER/Golgi;other cell component	nucleic acid binding activity;other molecular function	Pf00273	213	ENSG00000163631	ALB	E7ESS9; hsa:213; O95574; P02768; P04277; Q13140; Q645G4; Q68DN5; Q6UXK4; Q86YG0; Q8IUK7; Q9P157; Q9P1I7; Q9UHS3; Q9UJZ0	Selenium micronutrient network; Vitamin B12 metabolism; Folate metabolism; Complement system; VEGFA-VEGFR2 signaling	Scavenging of heme from plasma; Platelet degranulation ; Regulation of Insulin-like Growth Factor (IGF) transport and uptake by Insulin-like Growth Factor Binding Proteins (IGFBPs); Post-translational protein phosphorylation; Cytoprotection by HMOX1; Aspirin ADME; Ciprofloxacin ADME; Recycling of bile acids and salts; Prednisone ADME; Heme degradation; HDL remodeling; Heme biosynthesis	17	0	0.911	0.901631	0.994751	75.39	85.4	114.6	22.98	45.33	High	High	High	High	High	High	1
FALSE	High	Master Protein	P13533	Myosin-6 [OS=Homo sapiens]	0	2709.55	70	204	8856	74	1939	223.6	5.73	27877.2	204	cell organization and biogenesis;other metabolic processes;stress response;developmental processes;other biological processes	cytosol;cytoskeleton;other cell component	cytoskeletal activity;other molecular function	Pf00063, Pf01576, Pf02736	4624	ENSG00000197616	MYH6	A2RTX1; D9YZU2; P13533; Q13943; Q14906; Q14907	Cardiac progenitor differentiation; Striated muscle contraction pathway; Acute viral myocarditis; IL-18 signaling pathway	Striated Muscle Contraction	5	172	0.625	0.231421	0.719829	84.85	65.1	134.9	60.94	40.92	High	High	High	High	High	High	1
TRUE	High	Master Protein	P12883	Myosin-7 [OS=Homo sapiens]	0	2629.47	68	198	8280	64	1935	223	5.8	26188.3	198	cell organization and biogenesis;other metabolic processes;stress response;developmental processes;other biological processes	cytoskeleton;other cell component	cytoskeletal activity;other molecular function	Pf00063, Pf01576, Pf02736	4625	ENSG00000092054	MYH7	A2TDB6; B6D424; hsa:4625; P12883; Q14836; Q14837; Q14904; Q16579; Q2M1Y6; Q92679; Q9H1D5; Q9UDA2; Q9UMM8	IL-18 signaling pathway		1	8	2.069	0.0026895	0.0422052	113.49	115.5	84.5	89.85	74.87	High	High	High	High	High	High	1
FALSE	High	Master Protein	Q8WZ42	Titin [OS=Homo sapiens]	0	5691.4	45	1119	6195	1119	34350	3813.7	6.35	16458.3	1119	cell cycle OR cell proliferation;cell organization and biogenesis;other metabolic processes;developmental processes;signal transduction;other biological processes	non-structural extracellular;cytosol;cytoskeleton;nucleus	cytoskeletal activity;kinase activity;other molecular function	Pf00041, Pf00069, Pf02818, Pf07679, Pf09042, Pf18362	7273	ENSG00000155657	TTN	A6NKB1; E7EQE6; E7ET18; hsa:7273; K7ENY1; Q10465; Q10466; Q15598; Q2XUS3; Q32Q60; Q4U1Z6; Q4ZG20; Q6NSG0; Q6PDB1; Q6PJP0; Q7KYM2; Q7KYN4; Q7KYN5; Q7LDM3; Q7Z2X3; Q8TCG8; Q8WZ42; Q8WZ51; Q8WZ52; Q8WZ53; Q8WZB3; Q92761; Q92762; Q9UD97; Q9UP84; Q9Y6L9	Striated muscle contraction pathway; Cardiomyocyte signaling pathways converging on titin	Platelet degranulation ; Striated Muscle Contraction	4	0	0.944	0.80529	0.974118	75.09	92.3	107.7	41.11	54.4	High	High	High	High	High	High	1
FALSE	High	Master Protein	P12829	Myosin light chain 4 [OS=Homo sapiens]	0	364.236	91	23	4823	21	197	21.6	5.03	14704	23	other biological processes	cytosol;cytoskeleton	cytoskeletal activity;other molecular function		4635	ENSG00000198336	MYL4	D3DXJ7; P11783; P12829	Myometrial relaxation and contraction pathways; Striated muscle contraction pathway	Striated Muscle Contraction	3	2	0.848	0.896513	0.994135	61.68	107.6	92.4	31.17	34.17	High	High	High	High	High	High	1
FALSE	High	Master Protein	Q09666	Neuroblast differentiation-associated protein AHNAK [OS=Homo sapiens]	0	2215.48	77	311	3717	311	5890	628.7	6.15	10231.8	311	other biological processes	non-structural extracellular;plasma membrane;other membranes;cytosol;cytoskeleton;nucleus;other cell component	other molecular function		79026	ENSG00000124942	AHNAK	A1A586; hsa:79026; Q09666			0	0	0.88	0.998114	0.999898	59.82	89.6	110.4	29.93	31.92	High	High	High	High	High	High	1
FALSE	High	Master Protein	P68871	Hemoglobin subunit beta [OS=Homo sapiens]	0	208.08	97	18	2550	11	147	16	7.28	6630.58	18	other metabolic processes;stress response;transport;other biological processes	non-structural extracellular;cytosol;other cell component	other molecular function	Pf00042	3043	ENSG00000244734	HBB	A4GX73; B2ZUE0; hsa:3043; P02023; P68871; Q13852; Q14481; Q14510; Q45KT0; Q549N7; Q6FI08; Q6R7N2; Q8IZI1; Q9BX96; Q9UCD6; Q9UCP8; Q9UCP9	Selenium micronutrient network; Vitamin B12 metabolism; Folate metabolism	Neutrophil degranulation; Scavenging of heme from plasma; Late endosomal microautophagy; Heme signaling; Cytoprotection by HMOX1; Factors involved in megakaryocyte development and platelet production; Chaperone Mediated Autophagy; Erythrocytes take up carbon dioxide and release oxygen; Erythrocytes take up oxygen and release carbon dioxide	12	7	1.348	0.134204	0.599812	134.27	110.6	89.4	136.48	85.87	High	High	High	High	High	High	1
FALSE	High	Master Protein	P62736	Actin, aortic smooth muscle [OS=Homo sapiens]	0	441.075	87	27	2482	3	377	42	5.39	7379.51	27	developmental processes;other biological processes	extracellular matrix;cytosol;cytoskeleton;other cell component	other molecular function	Pf00022	59	ENSG00000107796	ACTA2	B2R8A4; hsa:59; P03996; P04108; P62736; Q6FI19	Myometrial relaxation and contraction pathways; Striated muscle contraction pathway; Mechanoregulation and pathology of YAP/TAZ via Hippo and non-Hippo mechanisms; 22q11.2 copy number variation syndrome; IL-18 signaling pathway; Regucalcin in proximal tubule epithelial kidney cells; Angiotensin II receptor type 1 pathway; Pleural mesothelioma; CCL18 signaling pathway; Urotensin-II-mediated signal…	Smooth Muscle Contraction; NOTCH4 Intracellular Domain Regulates Transcription	17	35	0.636	0.255432	0.75525	58.9	87.3	112.7	19.92	28.75	High	High	High	High	High	High	1
FALSE	High	Master Protein	P68133	Actin, alpha skeletal muscle [OS=Homo sapiens]	0	401.637	81	26	2305	2	377	42	5.39	6719.66	26	cell organization and biogenesis;other biological processes	cytosol;cytoskeleton;other cell component	cytoskeletal activity;other molecular function	Pf00022	58	ENSG00000143632	ACTA1	hsa:58; P02568; P68133; P99020; Q5T8M9	Myometrial relaxation and contraction pathways; Fas ligand pathway and stress induction of heat shock proteins; Physico-chemical features and toxicity-associated pathways; Striated muscle contraction pathway; Mechanoregulation and pathology of YAP/TAZ via Hippo and non-Hippo mechanisms; IL-18 signaling pathway; Pleural mesothelioma	Striated Muscle Contraction	8	1	0.808	0.766679	0.971624	72.43	95.4	104.6	22.45	19.04	High	High	High	High	High	High	1
FALSE	High	Master Protein	P02511	Alpha-crystallin B chain [OS=Homo sapiens]	0	302.379	96	23	2149	23	175	20.1	7.33	6815.24	23	cell organization and biogenesis;protein metabolism;other metabolic processes;stress response;developmental processes;signal transduction;other biological processes	plasma membrane;other membranes;cytosol;cytoskeleton;mitochondrion;nucleus;other cytoplasmic organelle;other cell component	cytoskeletal activity;other molecular function	Pf00011, Pf00525	1410	ENSG00000109846	CRYAB	B0YIX0; hsa:1410; O43416; P02511; Q9UC37; Q9UC38; Q9UC39; Q9UC40; Q9UC41		HSF1-dependent transactivation	1	0	1.093	0.446617	0.89663	85.85	101.5	98.5	39.57	58.5	High	High	High	High	High	High	1	Acetyl [N-Term]
FALSE	High	Master Protein	P02787	Serotransferrin [OS=Homo sapiens]	0	634.234	76	55	1852	55	698	77	7.12	5316.89	55											0	0	1.142	0.35983	0.841189	82.54	113.2	86.8	69.75	41.58	High	High	High	High	High	High	1
TRUE	High	Master Protein	P10916	Myosin regulatory light chain 2, ventricular/cardiac muscle isoform [OS=Homo sapiens]	0	260.976	93	19	1840	19	166	18.8	5	5222.56	19	cell organization and biogenesis;developmental processes;other biological processes	cytosol;cytoskeleton;other cell component	cytoskeletal activity;other molecular function	Pf13499	4633	ENSG00000111245	MYL2	hsa:4633; P10916; Q16123	Cardiac progenitor differentiation; Myometrial relaxation and contraction pathways; Focal adhesion; Striated muscle contraction pathway; VEGFA-VEGFR2 signaling; MFAP5 effect on permeability and motility of endothelial cells via cytoskeleton rearrangement	Striated Muscle Contraction	7	0	2.067	0.00270754	0.042315	92.33	131.8	68.2	32.31	88.88	High	High	High	High	High	High	1
FALSE	High	Master Protein	P17661	Desmin [OS=Homo sapiens]	0	414.826	80	48	1695	45	470	53.5	5.27	5373.89	48	cell organization and biogenesis;other biological processes	plasma membrane;other membranes;cytosol;cytoskeleton;nucleus;other cell component	cytoskeletal activity;other molecular function	Pf00038, Pf04732	1674	ENSG00000175084	DES	hsa:1674; P17661; Q15787; Q549R7; Q549R8; Q549R9; Q8IZR1; Q8IZR6; Q8NES2; Q8NEU6; Q8TAC4; Q8TCX2; Q8TD99; Q9UHN5; Q9UJ80	Arrhythmogenic right ventricular cardiomyopathy; Striated muscle contraction pathway; IL-18 signaling pathway; Synthesis of ceramides and 1-deoxyceramides; Markers of kidney cell lineage	Striated Muscle Contraction	6	3	1.435	0.0857243	0.462307	66.08	128.6	71.4	43.72	21.52	High	High	High	High	High	High	1
FALSE	High	Master Protein	P01009	Alpha-1-antitrypsin [OS=Homo sapiens]	0	380.587	64	31	1651	31	418	46.7	5.59	4801.56	31	stress response	non-structural extracellular;other membranes;ER/Golgi;other cell component	enzyme regulator activity;other molecular function	Pf00079	5265	ENSG00000197249	SERPINA1	A6PX14; B2RDQ8; P01009; Q0PVP5; Q13672; Q53XB8; Q5U0M1; Q7M4R2; Q86U18; Q86U19; Q96BF9; Q96ES1; Q9P1P0; Q9UCE6; Q9UCM3	Nuclear receptors meta-pathway; NRF2 pathway; Lung fibrosis; Lung fibrosis; Dengue-2 interactions with complement and coagulation cascades; Complement and coagulation cascades	Neutrophil degranulation; Platelet degranulation ; Regulation of Insulin-like Growth Factor (IGF) transport and uptake by Insulin-like Growth Factor Binding Proteins (IGFBPs); Post-translational protein phosphorylation; COPII-mediated vesicle transport; Cargo concentration in the ER	12	0	0.679	0.362686	0.842162	83.38	76.8	123.2	55.42	64.42	High	High	High	High	High	High	1
FALSE	High	Master Protein	P09493	Tropomyosin alpha-1 chain [OS=Homo sapiens]	0	315.749	81	38	1576	17	284	32.7	4.74	3782.73	38	cell organization and biogenesis;stress response;developmental processes;other biological processes	plasma membrane;other membranes;cytosol;cytoskeleton;other cell component	cytoskeletal activity;other molecular function	Pf00261	7168	ENSG00000140416	TPM1	B7Z5T7; D9YZV2; D9YZV3; D9YZV8; hsa:7168; P09493; P09494; P10469; Q6DV89; Q6DV90; Q7Z6L8; Q86W64; Q96IK2; Q9UCI1; Q9UCI2; Q9UCY9; Q9Y427	Vitamin D receptor pathway; Striated muscle contraction pathway; Cell lineage map for neuronal differentiation	Smooth Muscle Contraction; Striated Muscle Contraction	5	24	1.026	0.588172	0.929111	85.15	104.9	95.1	64.26	72.53	High	High	High	High	High	High	1
TRUE	High	Master Protein	P11055	Myosin-3 [OS=Homo sapiens]	0	429.478	16	45	1445	1	1940	223.8	5.81	4214.15	45	cell organization and biogenesis;other metabolic processes;developmental processes;other biological processes	cytosol;cytoskeleton;other cell component	cytoskeletal activity;other molecular function	Pf00063, Pf01576, Pf02736	4621	ENSG00000109063	MYH3	hsa:4621; P11055; Q15492	Striated muscle contraction pathway	Striated Muscle Contraction	2	0	3.011	0.00408659	0.0590474	25.33	150.1	49.9	23.82		Not Found	Peak Found	High	Not Found	Peak Found	Not Found	1
FALSE	High	Master Protein	P05413	Fatty acid-binding protein, heart [OS=Homo sapiens]	0	138.178	83	18	1421	18	133	14.8	6.8	3214.76	18	transport;other biological processes	non-structural extracellular;cytosol;nucleus	cytoskeletal activity;other molecular function	Pf00061	2170	ENSG00000121769	FABP3	B2RAB6; hsa:2170; P05413; Q5VV93; Q99957	PPAR signaling pathway; Fatty acid transporters; Fatty acids and lipoproteins transport in hepatocytes	Triglyceride catabolism	4	0	1.252	0.215443	0.700895	82.68	136.7	63.3	45.53	50.07	High	High	High	High	High	High	1
FALSE	High	Master Protein	Q9Y623	Myosin-4 [OS=Homo sapiens]	0	395.965	16	43	1384	4	1939	222.9	5.85	3980.03	43	other metabolic processes;other biological processes	cytoskeleton;other cell component	cytoskeletal activity;nucleic acid binding activity;other molecular function	Pf00063, Pf01576, Pf02736	4622	ENSG00000264424	MYH4	Q9Y623			0	1	0.621	0.222707	0.708259	99.82	11.2	188.8	135.02	94.78	Peak Found	High	Peak Found	High	High	High	1
FALSE	High	Master Protein	P04406	Glyceraldehyde-3-phosphate dehydrogenase [OS=Homo sapiens]	0	376.62	87	24	1358	24	335	36	8.46	4113.51	24	cell organization and biogenesis;protein metabolism;other metabolic processes;stress response;other biological processes	plasma membrane;other membranes;cytosol;cytoskeleton;nucleus;other cell component	enzyme regulator activity;cytoskeletal activity;other molecular function	Pf00044, Pf02800	2597	ENSG00000111640	GAPDH	E7EUT4; hsa:2597; P00354; P04406; Q53X65	Cori cycle; Alzheimer's disease and miRNA effects; HIF1A and PPARG regulation of glycolysis; VEGFA-VEGFR2 signaling; Clear cell renal cell carcinoma pathways; Metabolic reprogramming in colon cancer; Aerobic glycolysis; 7q11.23 copy number variation syndrome; Glycolysis in senescence; Alzheimer's disease; Sildenafil treatment; Glycolysis and gluconeogenesis; Metabolic Epileptic Disorders; Sudden …	Glycolysis; Gluconeogenesis	16	0	0.821	0.8105	0.974118	82.64	102.2	97.8	51.63	75.45	High	High	High	High	High	High	1
FALSE	High	Master Protein	P12111	Collagen alpha-3(VI) chain [OS=Homo sapiens]	0	776.714	45	121	1331	121	3177	343.5	6.68	3764.84	121	cell adhesion;other biological processes	extracellular matrix;plasma membrane;other membranes;ER/Golgi;other cell component	enzyme regulator activity;extracellular structural activity	Pf00014, Pf00092, Pf01391	1293	ENSG00000163359	COL6A3	A8MT30; B4E3U5; B7ZMJ7; E9PFQ6; E9PGQ9; hsa:1293; P12111; Q16501; Q53QF4; Q53QF6	miRNA targets in ECM and membrane receptors; PI3K-Akt signaling pathway; 2q37 copy number variation syndrome	Collagen degradation; Signaling by PDGF; Assembly of collagen fibrils and other multimeric structures; Integrin cell surface interactions; ECM proteoglycans; NCAM1 interactions; Collagen chain trimerization	11	0	1.907	0.00660182	0.0876071	103.45	150.2	49.8	84.44	72.17	High	High	High	High	High	High	1
FALSE	High	Master Protein	P69905	Hemoglobin subunit alpha [OS=Homo sapiens]	0	257.357	94	13	1288	13	142	15.2	8.68	3657.26	13	other metabolic processes;stress response;transport;other biological processes	non-structural extracellular;cytosol;other cell component	other molecular function	Pf00042	3039; 3040	ENSG00000188536; ENSG00000206172	HBA1; HBA2	hsa:3039; hsa:3040; P01922; P69905; Q1HDT5; Q3MIF5; Q53F97; Q96KF1; Q9NYR7; Q9UCM0	Selenium micronutrient network; Vitamin B12 metabolism; Folate metabolism; Effects of nitric oxide	Scavenging of heme from plasma; Heme signaling; Cytoprotection by HMOX1; Erythrocytes take up carbon dioxide and release oxygen; Erythrocytes take up oxygen and release carbon dioxide	9	0	1.332	0.14537	0.622619	138.73	88.1	111.9	143.73	88.7	High	High	High	High	High	High	1
FALSE	High	Master Protein	P06576	ATP synthase subunit beta, mitochondrial [OS=Homo sapiens]	0	421.204	67	28	1263	28	529	56.5	5.4	3671.91	28	other metabolic processes;transport;developmental processes;other biological processes	plasma membrane;other membranes;mitochondrion;other cell component	signal transduction activity or receptor binding;transporter activity;other molecular function	Pf00006, Pf02874	506	ENSG00000110955	ATP5F1B	A8K4X0; hsa:506; P06576; Q14283	Electron transport chain: OXPHOS system in mitochondria; 7q11.23 copy number variation syndrome; Oxidative phosphorylation	Transcriptional activation of mitochondrial biogenesis; Mitochondrial protein import; Mitochondrial protein degradation; Cristae formation; Formation of ATP by chemiosmotic coupling	8	0	0.595	0.170109	0.66509	67.56	84.1	115.9	43.58	18.95	High	High	High	High	High	High	1
FALSE	High	Master Protein	P60709	Actin, cytoplasmic 1 [OS=Homo sapiens]	0	271.257	73	23	1148	7	375	41.7	5.48	2879.96	23	cell organization and biogenesis;developmental processes;other biological processes	plasma membrane;other membranes;cytosol;cytoskeleton;nucleus;other cell component	cytoskeletal activity;other molecular function	Pf00022	60	ENSG00000075624	ACTB	hsa:60; P02570; P60709; P70514; P99021; Q11211; Q64316; Q75MN2; Q96B34; Q96HG5	Arrhythmogenic right ventricular cardiomyopathy; Pathogenic Escherichia coli infection; Common pathways underlying drug addiction; Myometrial relaxation and contraction pathways; Focal adhesion; Fas ligand pathway and stress induction of heat shock proteins; Ebola virus infection in host; Acute viral myocarditis; Thermogenesis; Mechanoregulation and pathology of YAP/TAZ via Hippo and non-Hippo me…	UCH proteinases; Clathrin-mediated endocytosis; DNA Damage Recognition in GG-NER; Translocation of SLC2A4 (GLUT4) to the plasma membrane; RHOF GTPase cycle; Regulation of actin dynamics for phagocytic cup formation; FCGR3A-mediated phagocytosis; Recycling pathway of L1; Sensory processing of sound by inner hair cells of the cochlea; Sensory processing of sound by outer hair cells of the cochlea; …	47	4	0.711	0.455662	0.898224	71.78	82	118	30.64	43.9	High	High	High	High	High	High	1
FALSE	High	Master Protein	P08590	Myosin light chain 3 [OS=Homo sapiens]	0	183.044	78	16	1131	14	195	21.9	5.1	3027.39	16	developmental processes;other biological processes	cytosol;cytoskeleton	cytoskeletal activity;other molecular function		4634	ENSG00000160808	MYL3	B2R534; hsa:4634; P08590; Q9NRS8	Striated muscle contraction pathway; Regulation of actin cytoskeleton	Striated Muscle Contraction	3	2	1.661	0.0256374	0.221564	86.45	119.7	80.3	68.18	72.27	High	High	High	High	High	High	1
TRUE	High	Master Protein	P13535	Myosin-8 [OS=Homo sapiens]	0	372.365	15	42	1120	1	1937	222.6	5.74	3112.62	42	other metabolic processes;other biological processes	cytosol;cytoskeleton;other cell component	cytoskeletal activity;other molecular function	Pf00063, Pf01576, Pf02736	4626	ENSG00000133020	MYH8	hsa:4626; P13535; Q14910	Striated muscle contraction pathway	Striated Muscle Contraction	2	0	2.281	0.0329623	0.263492	110.29	139	61	53.78	105.08	Not Found	High	High	Peak Found	Not Found	Peak Found	1
FALSE	High	Master Protein	P02042	Hemoglobin subunit delta [OS=Homo sapiens]	0	172.056	93	15	1108	8	147	16	8.05	3100.06	15	other metabolic processes;transport;other biological processes	cytosol;other cell component	other molecular function	Pf00042	3045	ENSG00000223609	HBD	hsa:3045; P02042; Q3Y5H3; Q8WXT7	VEGFA-VEGFR2 signaling	Factors involved in megakaryocyte development and platelet production	2	0	1.458	0.0761932	0.437397	139.11	108.8	91.2	162.31	89.84	High	High	High	High	High	High	1
FALSE	High	Master Protein	P51888	Prolargin [OS=Homo sapiens]	0	236.463	55	24	1101	24	382	43.8	9.38	2925.39	24	other metabolic processes;stress response;developmental processes	non-structural extracellular;extracellular matrix;ER/Golgi;other cytoplasmic organelle	extracellular structural activity;other molecular function	Pf13855	5549	ENSG00000188783	PRELP	hsa:5549; P51888; Q6FG38		Keratan sulfate biosynthesis; Keratan sulfate degradation; Defective CHST6 causes MCDC1; Defective ST3GAL3 causes MCT12 and EIEE15; Defective B4GALT1 causes B4GALT1-CDG (CDG-2d)	5	0	0.778	0.665595	0.94707	66.97	100.1	99.9	23.15	35.65	High	High	High	High	High	High	1
FALSE	High	Master Protein	P08670	Vimentin [OS=Homo sapiens]	0	418.186	84	47	1062	41	466	53.6	5.12	3062.24	47	cell organization and biogenesis;stress response;developmental processes;signal transduction;other biological processes	plasma membrane;other membranes;cytosol;cytoskeleton;nucleus;other cytoplasmic organelle;other cell component	cytoskeletal activity;nucleic acid binding activity;other molecular function	Pf00038, Pf04732	7431	ENSG00000026025	VIM	B0YJC2; D3DRU4; hsa:7431; P08670; Q15867; Q15868; Q15869; Q548L2; Q6LER9; Q8N850; Q96ML2; Q9NTM3	Allograft rejection; Spinal cord injury; Primary focal segmental glomerulosclerosis (FSGS); Mammary gland development pathway - Puberty (Stage 2 of 4); Apoptosis-related network due to altered Notch3 in ovarian cancer; Striated muscle contraction pathway; TGF-beta signaling in thyroid cells for epithelial-mesenchymal transition; Ciliary landscape; Burn wound healing; CCL18 signaling pathway; TROP…	Aggrephagy; Interleukin-4 and Interleukin-13 signaling; Chaperone Mediated Autophagy; Late endosomal microautophagy; Striated Muscle Contraction; RHOBTB1 GTPase cycle; Caspase-mediated cleavage of cytoskeletal proteins	21	5	1.101	0.430152	0.888186	79.36	107.8	92.2	57	52.44	High	High	High	High	High	High	1
FALSE	High	Master Protein	P45379	Troponin T, cardiac muscle [OS=Homo sapiens]	0	212.95	45	23	979	23	298	35.9	4.97	2377.31	23	cell organization and biogenesis;developmental processes;other biological processes	cytosol;cytoskeleton	cytoskeletal activity;other molecular function	Pf00992	7139	ENSG00000118194	TNNT2	A2TDB9; A8K3K6; hsa:7139; O60214; P45379; Q99596; Q99597; Q9BUF6; Q9UM96	Cardiac progenitor differentiation; Striated muscle contraction pathway	Striated Muscle Contraction	3	0	0.596	0.172671	0.66835	66.64	83.6	116.4	39.25	37.65	High	High	High	High	High	High	1
FALSE	High	Master Protein	P21333	Filamin-A [OS=Homo sapiens]	0	813.314	61	123	967	111	2647	280.6	6.06	2772.32	123	cell cycle OR cell proliferation;cell organization and biogenesis;protein metabolism;RNA metabolism OR transcription;other metabolic processes;stress response;transport;developmental processes;signal transduction;other biological processes	non-structural extracellular;plasma membrane;other membranes;cytosol;cytoskeleton;ER/Golgi;nucleus;other cell component	signal transduction activity or receptor binding;cytoskeletal activity;other molecular function	Pf00307, Pf00630	2316	ENSG00000196924	FLNA	E9KL45; hsa:2316; P21333; Q5HY53; Q5HY55; Q8NF52	Androgen receptor signaling pathway; Prolactin signaling pathway; Focal adhesion; Hypothesized pathways in pathogenesis of cardiovascular disease; MAPK signaling pathway; IL-4 signaling pathway; Ebola virus infection in host; Joubert syndrome; NPHP1 deletion syndrome	OAS antiviral response; Platelet degranulation ; RHO GTPases activate PAKs; GP1b-IX-V activation signalling; Cell-extracellular matrix interactions	14	12	0.977	0.71299	0.960029	81.95	98.4	101.6	72.06	5.92	High	High	High	High	High	High	1
FALSE	High	Master Protein	P04792	Heat shock protein beta-1 [OS=Homo sapiens]	0	244.705	90	20	966	20	205	22.8	6.4	2827.26	20	protein metabolism;other metabolic processes;stress response;transport;signal transduction;other biological processes	plasma membrane;cytosol;cytoskeleton;nucleus;other cell component	enzyme regulator activity;other molecular function	Pf00011	3315	ENSG00000106211	HSPB1	B2R4N8; hsa:3315; P04792; Q6FI47; Q96C20; Q96EI7; Q9UC31; Q9UC34; Q9UC35; Q9UC36	Apoptosis-related network due to altered Notch3 in ovarian cancer; Fas ligand pathway and stress induction of heat shock proteins; MAPK signaling pathway; ATM signaling in development and disease ; VEGFA-VEGFR2 signaling; p38 MAPK signaling pathway; Extracellular vesicles in the crosstalk of cardiac cells; Ferroptosis; IL-18 signaling pathway; Intracellular trafficking proteins involved in CMT ne…	AUF1 (hnRNP D0) binds and destabilizes mRNA; MAPK6/MAPK4 signaling; Extra-nuclear estrogen signaling; VEGFA-VEGFR2 Pathway	18	0	0.647	0.28029	0.781135	64.35	83.3	116.7	45.71	34.28	High	High	High	High	High	High	1
FALSE	High	Master Protein	O75112	LIM domain-binding protein 3 [OS=Homo sapiens]	0	393.803	57	30	933	30	727	77.1	8.13	2876.19	30	cell organization and biogenesis;developmental processes;other biological processes	cytoskeleton;other cell component	cytoskeletal activity;other molecular function	Pf00412, Pf00595, Pf15936	11155	ENSG00000122367	LDB3	A2TDB7; A6NIV4; B4E3K3; hsa:11155; O75112; Q5K6N9; Q5K6P0; Q5K6P1; Q96FH2; Q9Y4Z3; Q9Y4Z4; Q9Y4Z5	10q22q23 copy number variation		1	0	1.012	0.62144	0.937983	61.94	104.8	95.2	42.92	35.68	High	High	High	High	High	High	1
FALSE	High	Master Protein	P10809	60 kDa heat shock protein, mitochondrial [OS=Homo sapiens]	0	444.408	77	43	903	43	573	61	5.87	2865.22	43	cell cycle OR cell proliferation;cell organization and biogenesis;protein metabolism;DNA metabolism;other metabolic processes;stress response;transport;developmental processes;signal transduction;other biological processes	non-structural extracellular;plasma membrane;other membranes;cytosol;cytoskeleton;mitochondrion;other cytoplasmic organelle;other cell component	nucleic acid binding activity;other molecular function	Pf00118	3329	ENSG00000144381	HSPD1	B2R5M6; B7Z712; hsa:3329; P10809; Q38L19; Q9UCR6	Apoptosis-related network due to altered Notch3 in ovarian cancer; 8p23.1 copy number variation syndrome; Sudden infant death syndrome (SIDS) susceptibility pathways	Mitochondrial protein degradation; Mitochondrial protein import; TFAP2A acts as a transcriptional repressor during retinoic acid induced cell differentiation	6	0	0.937	0.824218	0.977823	71.63	127.7	72.3	34.65	53.93	High	High	High	High	High	High	1
TRUE	High	Master Protein	P06753	Tropomyosin alpha-3 chain [OS=Homo sapiens]	0	213.093	72	29	883	13	285	32.9	4.72	2034.66	29	cell organization and biogenesis;other biological processes	cytosol;cytoskeleton	cytoskeletal activity	Pf00261	7170	ENSG00000143549	TPM3	D3DV71; hsa:7170; P06753; P12324; Q2QD06; Q5VU58; Q5VU63; Q5VU66; Q5VU71; Q5VU72; Q8TCG3; Q969Q2; Q9NQH8	Mammary gland development pathway - Pregnancy and lactation (Stage 3 of 4); Striated muscle contraction pathway; VEGFA-VEGFR2 signaling	RHOV GTPase cycle; Signaling by ALK fusions and activated point mutants; Smooth Muscle Contraction; Striated Muscle Contraction	7	1	2.474	0.000284198	0.00614799	94.05	136.9	63.1	74.29	41.56	High	High	High	High	High	High	1
FALSE	High	Master Protein	Q14896	Myosin-binding protein C, cardiac-type [OS=Homo sapiens]	0	573.841	66	73	874	73	1274	140.7	6.65	2656.92	73	cell adhesion;developmental processes;other biological processes	cytosol;cytoskeleton	cytoskeletal activity;other molecular function	Pf00041, Pf07679, Pf18362	4607	ENSG00000134571	MYBPC3	A5PL00; hsa:4607; Q14896; Q16410; Q6R2F7; Q9UE27; Q9UM53	Striated muscle contraction pathway	Striated Muscle Contraction	2	0	0.753	0.587107	0.929111	90.52	81.2	118.8	63.51	29.2	High	High	High	High	High	High	1
FALSE	High	Master Protein	Q01449	Myosin regulatory light chain 2, atrial isoform [OS=Homo sapiens]	0	170.821	89	14	848	14	175	19.4	4.88	2318.51	14	developmental processes;other biological processes	cytosol;cytoskeleton;other cell component	other molecular function		58498	ENSG00000106631	MYL7	B2R4L3; hsa:58498; Q01449	Focal adhesion	Smooth Muscle Contraction	2	0	0.832	0.846945	0.983607	78.18	104.1	95.9	49.83	26.8	High	High	High	High	High	High	1
FALSE	High	Master Protein	P02144	Myoglobin [OS=Homo sapiens]	0	180.977	68	14	847	14	154	17.2	7.68	2349.37	14	stress response;transport;developmental processes;signal transduction;other biological processes	cytosol	other molecular function	Pf00042	4151	ENSG00000198125	MB	hsa:4151; P02144; Q52H51; Q5THY7	Effects of nitric oxide	Intracellular oxygen transport	2	0	0.808	0.765768	0.970903	72.56	102	98	37.57	38.24	High	High	High	High	High	High	1
FALSE	High	Master Protein	P38646	Stress-70 protein, mitochondrial [OS=Homo sapiens]	0	388.551	61	41	847	41	679	73.6	6.16	2466.41	41	cell organization and biogenesis;protein metabolism;other metabolic processes;transport;other biological processes	other membranes;mitochondrion;nucleus;other cell component	other molecular function	Pf00012	3313	ENSG00000113013	HSPA9	B2RCM1; hsa:3313; P30036; P31932; P38646; Q1HB43; Q53H23; Q6GU03; Q9BWB7; Q9UC56	Parkin-ubiquitin proteasomal system pathway; Iron-sulfur cluster biogenesis	Gene and protein expression by JAK-STAT signaling after Interleukin-12 stimulation; Mitochondrial protein degradation; Mitochondrial protein import; Regulation of HSF1-mediated heat shock response; Cristae formation	7	0	1.037	0.562858	0.925611	68.99	127.2	72.8	38.3	54.43	High	High	High	High	High	High	1
FALSE	High	Master Protein	P25705	ATP synthase subunit alpha, mitochondrial [OS=Homo sapiens]	0	301.635	68	37	845	37	553	59.7	9.13	2489.34	37	other metabolic processes;transport;other biological processes	plasma membrane;other membranes;mitochondrion;other cell component	signal transduction activity or receptor binding;transporter activity;other molecular function	Pf00006, Pf00306, Pf02874	498	ENSG00000152234	ATP5F1A	A8K092; B4DY56; hsa:498; K7ENP3; P25705; Q53XX6; Q8IXV2; Q96FB4; Q96HW2; Q96IR6; Q9BTV8	Electron transport chain: OXPHOS system in mitochondria; 7q11.23 copy number variation syndrome; Oxidative phosphorylation	Mitochondrial protein import; Mitochondrial protein degradation; Cristae formation; Formation of ATP by chemiosmotic coupling	7	0	0.617	0.213743	0.700895	68.81	88	112	46.21	40.03	High	High	High	High	High	High	1
FALSE	High	Master Protein	P17540	Creatine kinase S-type, mitochondrial [OS=Homo sapiens]	0	306.23	63	27	830	26	419	47.5	8.19	2519.83	27	other metabolic processes;other biological processes	other membranes;mitochondrion	kinase activity;other molecular function	Pf00217, Pf02807	1160	ENSG00000131730	CKMT2	hsa:1160; P17540; Q6ICS8; Q8N1E1		Creatine metabolism	1	1	1.184	0.296567	0.790777	55.61	107.4	92.6	33.27	29.58	High	High	High	High	High	High	1
FALSE	High	Master Protein	P20774	Mimecan [OS=Homo sapiens]	0	174.827	50	19	818	19	298	33.9	5.63	2302.21	19	developmental processes;signal transduction;other biological processes	extracellular matrix;ER/Golgi;other cytoplasmic organelle	signal transduction activity or receptor binding	Pf13855	4969	ENSG00000106809; ENSG00000291350	OGN	hsa:4969; P20774; Q6FIB0; Q9UF90; Q9UNK5		Keratan sulfate degradation; Keratan sulfate biosynthesis; Defective CHST6 causes MCDC1; Defective ST3GAL3 causes MCT12 and EIEE15; Defective B4GALT1 causes B4GALT1-CDG (CDG-2d)	5	0	0.653	0.294725	0.788937	58.73	80.4	119.6	13.88	34.22	High	High	High	High	High	High	1
FALSE	High	Master Protein	P21796	Voltage-dependent anion-selective channel protein 1 [OS=Homo sapiens]	0	195.62	78	19	811	18	283	30.8	8.54	2481.89	19	cell-cell signaling;other metabolic processes;stress response;transport;other biological processes	plasma membrane;other membranes;mitochondrion;other cell component	transporter activity;other molecular function	Pf01459	7416	ENSG00000213585	VDAC1	B3KVK4; D3DQ93; P21796; Q5FVE7; Q9UIQ5; Q9UPL0	Alzheimer's disease and miRNA effects; Alzheimer's disease; Arsenic metabolism and reactive oxygen species generation; Cholesterol metabolism; Fatty acids and lipoproteins transport in hepatocytes	PINK1-PRKN Mediated Mitophagy; Ub-specific processing proteases; Pyruvate metabolism; Mitochondrial protein import; Mitochondrial calcium ion transport	10	1	1.63	0.0303783	0.247027	81.59	142	58	32.95	72.08	High	High	High	High	High	High	1
FALSE	High	Master Protein	P60174	Triosephosphate isomerase [OS=Homo sapiens]	0	242.084	80	17	806	17	249	26.7	6.9	2518.18	17	other metabolic processes	cytosol	other molecular function	Pf00121	7167	ENSG00000111669	TPI1	B7Z5D8; D3DUS9; hsa:7167; P00938; P60174; Q6FHP9; Q6IS07; Q8WWD0; Q96AG5	Fatty acid beta-oxidation; Cori cycle; HIF1A and PPARG regulation of glycolysis; Clear cell renal cell carcinoma pathways; Aerobic glycolysis; Disorders of fructose metabolism; Glycolysis and gluconeogenesis; Metabolic Epileptic Disorders	Glycolysis; Gluconeogenesis	10	0	0.814	0.786908	0.97229	70	107.2	92.8	18.78	55.32	High	High	High	High	High	High	1
FALSE	High	Master Protein	Q702N8	Xin actin-binding repeat-containing protein 1 [OS=Homo sapiens]	0	654.256	65	92	794	91	1843	198.4	6.15	2240.16	92	cell organization and biogenesis;other biological processes	other cell component	cytoskeletal activity	Pf08043	165904	ENSG00000168334	XIRP1	A0JP25; A4QPE2; hsa:165904; Q68DF2; Q6ZTR3; Q702N8; Q702N9; Q8IVN7; Q8N1N3; Q8N904; Q8TCG7			0	1	1.023	0.597176	0.931852	103.9	104.9	95.1	50.31	102.93	High	High	High	High	High	High	1
FALSE	High	Master Protein	P06732	Creatine kinase M-type [OS=Homo sapiens]	0	262.385	77	27	791	26	381	43.1	7.25	2260.42	27	other metabolic processes	non-structural extracellular;cytosol	kinase activity;other molecular function	Pf00217, Pf02807	1158	ENSG00000104879	CKM	hsa:1158; P06732; Q96QL9		Creatine metabolism	1	1	0.741	0.548512	0.921858	52.55	80.1	119.9	28.31	18.97	High	High	High	High	High	High	1
FALSE	High	Master Protein	Q14315	Filamin-C [OS=Homo sapiens]	0	673.315	53	110	785	97	2725	290.8	5.97	2199.36	110	cell organization and biogenesis	plasma membrane;other membranes;cytosol;cytoskeleton;other cell component	cytoskeletal activity;other molecular function	Pf00307, Pf00630	2318	ENSG00000128591	FLNC	B2ZZ88; hsa:2318; O95303; Q07985; Q14315; Q9NS12; Q9NYE5; Q9UMR8; Q9Y503	Focal adhesion; MAPK signaling pathway; Ebola virus infection in host; NPHP1 deletion syndrome; 13q12.12 copy number variation	Cell-extracellular matrix interactions	6	4	1.031	0.576237	0.929111	80.21	116.8	83.2	13.45	70.09	High	High	High	High	High	High	1	Acetyl [N-Term]
FALSE	High	Master Protein	Q99798	Aconitate hydratase, mitochondrial [OS=Homo sapiens]	0	449.668	68	42	776	42	780	85.4	7.61	2450.56	42	other metabolic processes;stress response;developmental processes	cytosol;mitochondrion	other molecular function	Pf00330, Pf00694	50	ENSG00000100412	ACO2	hsa:50; O75809; Q5JZ41; Q6FHX0; Q8TAQ6; Q99798	Amino acid metabolism; Metabolic reprogramming in colon cancer; Fluoroacetic acid toxicity; TCA cycle (aka Krebs or citric acid cycle)	Mitochondrial protein degradation; Citric acid cycle (TCA cycle); Mitochondrial protein import	7	0	0.92	0.873536	0.988397	67.51	90.6	109.4	42.98	45.28	High	High	High	High	High	High	1
FALSE	High	Master Protein	P07951	Tropomyosin beta chain [OS=Homo sapiens]	0	216.407	66	29	756	11	284	32.8	4.7	1912.18	29	cell organization and biogenesis;other biological processes	cytosol;cytoskeleton	cytoskeletal activity;other molecular function	Pf00261	7169	ENSG00000198467	TPM2	A6NM85; hsa:7169; P06468; P07951; Q13894; Q53FM4; Q5TCU4; Q5TCU7; Q9UH67	Striated muscle contraction pathway; 5q35 copy number variation	Striated Muscle Contraction; Smooth Muscle Contraction	4	8	1.295	0.174426	0.670651	95.29	119.5	80.5	32.96	96.08	High	High	High	High	High	High	1
FALSE	High	Master Protein	P06733	Alpha-enolase [OS=Homo sapiens]	0	265.976	72	28	743	24	434	47.1	7.39	2259.72	28	other metabolic processes;other biological processes	plasma membrane;other membranes;cytosol;cytoskeleton;nucleus;other cell component	nucleic acid binding activity;other molecular function	Pf00113, Pf03952	2023	ENSG00000074800	ENO1	B2RD59; hsa:2023; P06733; P22712; Q16704; Q4TUS4; Q53FT9; Q53HR3; Q658M5; Q6GMP2; Q71V37; Q7Z3V6; Q8WU71; Q96GV1; Q9BT62; Q9UCH6; Q9UM55	Clear cell renal cell carcinoma pathways; Metabolic reprogramming in colon cancer; Aerobic glycolysis; IL-18 signaling pathway; Glycolysis and gluconeogenesis; Metabolic Epileptic Disorders	Glycolysis; Gluconeogenesis; Manipulation of host energy metabolism	9	4	0.84	0.870732	0.988397	66.99	95.9	104.1	31.81	48.21	High	High	High	High	High	High	1
FALSE	High	Master Protein	P51884	Lumican [OS=Homo sapiens]	0	125.146	41	13	723	13	338	38.4	6.61	1764.76	13	cell organization and biogenesis;other biological processes	extracellular matrix;ER/Golgi;other cytoplasmic organelle	extracellular structural activity;other molecular function	Pf01462, Pf13516, Pf13855	4060	ENSG00000139329	LUM	B2R6R5; hsa:4060; P51884; Q96QM7		Integrin cell surface interactions; ECM proteoglycans; Keratan sulfate biosynthesis; Keratan sulfate degradation; Defective CHST6 causes MCDC1; Defective ST3GAL3 causes MCT12 and EIEE15; Defective B4GALT1 causes B4GALT1-CDG (CDG-2d)	7	0	0.978	0.708885	0.960029	68.07	82.6	117.4	52.75	42.91	High	High	High	High	High	High	1
FALSE	High	Master Protein	O75947	ATP synthase subunit d, mitochondrial [OS=Homo sapiens]	0	143.362	75	14	715	14	161	18.5	5.3	2180.64	14	other metabolic processes;transport	other membranes;mitochondrion	transporter activity	Pf05873	10476	ENSG00000167863	ATP5PD	B2R5L6; hsa:10476; O75947; Q9H3J4	Electron transport chain: OXPHOS system in mitochondria; Oxidative phosphorylation	Mitochondrial protein degradation; Cristae formation; Formation of ATP by chemiosmotic coupling	5	0	0.795	0.723017	0.960029	83.25	98.3	101.7	45.61	47.29	High	High	High	High	High	High	1
FALSE	High	Master Protein	P02790	Hemopexin [OS=Homo sapiens]	0	258.557	69	28	707	28	462	51.6	7.02	2143.88	28	protein metabolism;other metabolic processes;stress response;transport;signal transduction;other biological processes	non-structural extracellular;other cell component	transporter activity;other molecular function	Pf00045	3263	ENSG00000110169	HPX	B2R957; hsa:3263; P02790		Scavenging of heme from plasma	1	0	0.79	0.707668	0.960029	43.76	100	100	10.66	26.26	High	High	High	High	High	High	1
FALSE	High	Master Protein	P35749	Myosin-11 [OS=Homo sapiens]	0	653.06	50	102	702	82	1972	227.2	5.5	1981.18	102	cell organization and biogenesis;developmental processes;other biological processes	cytosol;cytoskeleton;other cell component	cytoskeletal activity;other molecular function	Pf00063, Pf01576, Pf02736	4629	ENSG00000133392; ENSG00000276480	MYH11	D2JYH7; hsa:4629; O00396; O94944; P35749; P78422; Q3MIV8; Q3MNF0; Q3MNF1	VEGFA-VEGFR2 signaling	RHO GTPases activate CIT; EPHA-mediated growth cone collapse; Sema4D induced cell migration and growth-cone collapse; Smooth Muscle Contraction; RHO GTPases activate PKNs; RHO GTPases Activate ROCKs; RHO GTPases activate PAKs	8	15	0.66	0.312784	0.805845	88.39	94.3	105.7	52.27	64.08	High	High	High	High	High	High	1
FALSE	High	Master Protein	P02647	Apolipoprotein A-I [OS=Homo sapiens]	0	194.652	68	25	692	25	267	30.8	5.76	1848.64	25	cell cycle OR cell proliferation;cell organization and biogenesis;protein metabolism;other metabolic processes;transport;developmental processes;signal transduction;other biological processes	non-structural extracellular;plasma membrane;other membranes;cytosol;ER/Golgi;other cytoplasmic organelle;other cell component	signal transduction activity or receptor binding;transporter activity;enzyme regulator activity;other molecular function	Pf01442	335	ENSG00000118137	APOA1	A8K866; hsa:335; P02647; Q6LDN9; Q6Q785; Q9UCS8; Q9UCT8	Selenium micronutrient network; Vitamin B12 metabolism; Folate metabolism; Complement system; PPAR-alpha pathway; Nuclear receptors meta-pathway; PPAR signaling pathway; Statin inhibition of cholesterol production; Familial hyperlipidemia type 1; Familial hyperlipidemia type 2; Familial hyperlipidemia type 3; Familial hyperlipidemia type 4; Familial hyperlipidemia type 5; Cholesterol metabolism; …	Platelet degranulation ; Scavenging of heme from plasma; PPARA activates gene expression; Amyloid fiber formation; Scavenging by Class B Receptors; Heme signaling; Regulation of Insulin-like Growth Factor (IGF) transport and uptake by Insulin-like Growth Factor Binding Proteins (IGFBPs); Post-translational protein phosphorylation; Retinoid metabolism and transport; HDL clearance; Defective ABCA1 …	32	0	1.271	0.196153	0.683411	100.5	96.7	103.3	54.5	77.83	High	High	High	High	High	High	1
FALSE	High	Master Protein	P11142	Heat shock cognate 71 kDa protein [OS=Homo sapiens]	0	271.207	50	28	684	21	646	70.9	5.52	2025.32	28	cell organization and biogenesis;protein metabolism;RNA metabolism OR transcription;other metabolic processes;stress response;transport;other biological processes	non-structural extracellular;plasma membrane;other membranes;cytosol;nucleus;other cytoplasmic organelle;other cell component	signal transduction activity or receptor binding;other molecular function	Pf00012	3312	ENSG00000109971	HSPA8	hsa:3312; P11142; Q9H3R6	Parkin-ubiquitin proteasomal system pathway; MAPK signaling pathway; Exercise-induced circadian regulation; Measles virus infection; Opioid receptor pathways; Extrafollicular and follicular B cell activation by SARS-CoV-2; 1p36 copy number variation syndrome; HDAC6 interactions in the central nervous system	AUF1 (hnRNP D0) binds and destabilizes mRNA; Neutrophil degranulation; Golgi Associated Vesicle Biogenesis; Late endosomal microautophagy; Chaperone Mediated Autophagy; HSP90 chaperone cycle for steroid hormone receptors (SHR) in the presence of ligand; PKR-mediated signaling; Regulation of HSF1-mediated heat shock response; Lysosome Vesicle Biogenesis; Clathrin-mediated endocytosis; mRNA Splicin…	27	4	1.047	0.540325	0.919105	74.06	118.7	81.3	28.18	50.49	High	High	High	High	High	High	1
FALSE	High	Master Protein	P40926	Malate dehydrogenase, mitochondrial [OS=Homo sapiens]	0	187.829	62	17	682	17	338	35.5	8.68	1942.53	17	other metabolic processes	other membranes;mitochondrion;other cell component	other molecular function	Pf00056, Pf02866	4191	ENSG00000146701	MDH2	A8K414; B2RE78; B4DE44; E9PDB2; O43682; P40926	Amino acid metabolism; Metabolic reprogramming in colon cancer; NAD metabolism in oncogene-induced senescence and mitochondrial dysfunction-associated senescence; Glycolysis and gluconeogenesis; Metabolic Epileptic Disorders; 7q11.23 distal copy number variation; TCA cycle (aka Krebs or citric acid cycle)	Mitochondrial protein degradation; Gluconeogenesis; Citric acid cycle (TCA cycle)	10	0	1.524	0.0537217	0.357618	91.02	133.7	66.3	39.4	92.6	High	High	High	High	High	High	1
FALSE	High	Master Protein	P08603	Complement factor H [OS=Homo sapiens]	0	436.382	63	62	679	54	1231	139	6.61	1806.5	62	protein metabolism;stress response;other biological processes	non-structural extracellular;other cell component	other molecular function	Pf00084	3075	ENSG00000000971	CFH	A5PL14; hsa:3075; P08603; P78435; Q14570; Q2TAZ5; Q38G77; Q5TFM3; Q8N708; Q9NU86	Complement system; Dengue-2 interactions with complement and coagulation cascades; Complement system in neuronal development and plasticity; Network map of SARS-CoV-2 signaling pathway; Complement and coagulation cascades	Regulation of Complement cascade	6	9	0.911	0.901914	0.994751	53.92	94.3	105.7	13.46	37.66	High	High	High	High	High	High	1
FALSE	High	Master Protein	P00738	Haptoglobin [OS=Homo sapiens]	0	272.732	57	25	678	12	406	45.2	6.58	1962.86	25	stress response;other biological processes	non-structural extracellular;other cell component	other molecular function	Pf00089	3240	ENSG00000257017	HP	B0AZL5; hsa:3240; P00737; P00738; Q0VAC4; Q0VAC5; Q2PP15; Q3B7J0; Q6LBY9; Q9UC67	Network map of SARS-CoV-2 signaling pathway	Neutrophil degranulation; Scavenging of heme from plasma	3	14	0.532	0.0781475	0.443299	65.37	60.5	139.5	34.85	51.42	High	High	High	High	High	High	1
FALSE	High	Master Protein	P04075	Fructose-bisphosphate aldolase A [OS=Homo sapiens]	0	288.543	83	24	659	20	364	39.4	8.09	2092.77	24	cell organization and biogenesis;other metabolic processes;other biological processes	non-structural extracellular;cytosol;cytoskeleton;other cell component	cytoskeletal activity;other molecular function	Pf00274	226	ENSG00000149925	ALDOA	B4DXI7; hsa:226; P04075; Q6FH76; Q6FI10; Q96B15; Q9BWD9; Q9UCN2	VEGFA-VEGFR2 signaling; Clear cell renal cell carcinoma pathways; Aerobic glycolysis; 16p11.2 proximal deletion syndrome; Glycolysis and gluconeogenesis; Metabolic Epileptic Disorders; Sudden infant death syndrome (SIDS) susceptibility pathways	Neutrophil degranulation; Glycolysis; Gluconeogenesis; Platelet degranulation	11	4	0.866	0.956285	0.996892	84.64	99.4	100.6	20.47	95.48	High	High	High	High	High	High	1
FALSE	High	Master Protein	P62937	Peptidyl-prolyl cis-trans isomerase A [OS=Homo sapiens]	0	128.071	60	12	645	12	165	18	7.81	1822.92	12	cell adhesion;cell organization and biogenesis;protein metabolism;other metabolic processes;stress response;developmental processes;other biological processes	non-structural extracellular;nucleus;other cell component	signal transduction activity or receptor binding;other molecular function	Pf00160	5478	ENSG00000196262	PPIA	A8K220; hsa:5478; P05092; P62937; Q3KQW3; Q567Q0; Q6IBU5; Q96IX3; Q9BRU4; Q9BTY9; Q9UC61	Prolactin signaling pathway	Platelet degranulation ; Neutrophil degranulation; Gene and protein expression by JAK-STAT signaling after Interleukin-12 stimulation; Budding and maturation of HIV virion; Basigin interactions; SARS-CoV-1 activates/modulates innate immune responses; Integration of provirus; APOBEC3G mediated resistance to HIV-1 infection; Calcineurin activates NFAT; Binding and entry of HIV virion; Assembly Of T…	16	0	0.855	0.919507	0.994751	63.92	90.5	109.5	45.13	55.38	High	High	High	High	High	High	1
FALSE	High	Master Protein	P11177	Pyruvate dehydrogenase E1 component subunit beta, mitochondrial [OS=Homo sapiens]	0	239.09	73	18	640	18	359	39.2	6.65	1887.14	18	other metabolic processes	mitochondrion;nucleus;other cell component	other molecular function	Pf02779, Pf02780	5162	ENSG00000168291	PDHB	B2R7L0; B4DDD7; hsa:5162; P11177; Q6FH45; Q9BQ27; Q9UFK3	Hereditary leiomyomatosis and renal cell carcinoma pathway; Metabolic reprogramming in colon cancer; Orexin receptor pathway	Glyoxylate metabolism and glycine degradation; Regulation of pyruvate dehydrogenase (PDH) complex; Signaling by Retinoic Acid; Mitochondrial protein degradation	8	0	1.126	0.386739	0.861945	79.2	111.9	88.1	42.94	42.29	High	High	High	High	High	High	1
FALSE	High	Master Protein	P98160	Basement membrane-specific heparan sulfate proteoglycan core protein [OS=Homo sapiens]	0	659.153	39	106	619	106	4391	468.5	6.51	1623.94	106	other metabolic processes;stress response;transport;developmental processes;signal transduction;other biological processes	extracellular matrix;plasma membrane;other membranes;ER/Golgi;other cytoplasmic organelle	signal transduction activity or receptor binding;extracellular structural activity;other molecular function	Pf00008, Pf00052, Pf00053, Pf00054, Pf00057, Pf02210, Pf07679, Pf13895, Pf13927	3339	ENSG00000142798	HSPG2	hsa:3339; P98160; Q16287; Q5SZI3; Q9H3V5	Hepatitis B infection; Comprehensive IL-17A signaling	Integrin cell surface interactions; ECM proteoglycans; Non-integrin membrane-ECM interactions; Retinoid metabolism and transport; RSV-host interactions; Amyloid fiber formation; Degradation of the extracellular matrix; Respiratory syncytial virus (RSV) attachment and entry; A tetrasaccharide linker sequence is required for GAG synthesis; HS-GAG biosynthesis; HS-GAG degradation; Defective B4GALT7 …	20	0	1.061	0.509949	0.905576	62.1	110.7	89.3	38.74	31.24	High	High	High	High	High	High	1
FALSE	High	Master Protein	P0DMV9	Heat shock 70 kDa protein 1B [OS=Homo sapiens]	0	271.198	58	30	609	28	641	70	5.66	1938.64	30	protein metabolism;RNA metabolism OR transcription;other metabolic processes;stress response;other biological processes	non-structural extracellular;cytosol;cytoskeleton;mitochondrion;ER/Golgi;nucleus;other cell component	signal transduction activity or receptor binding;other molecular function	Pf00012	3303; 3304	ENSG00000204388; ENSG00000212866; ENSG00000224501; ENSG00000231555; ENSG00000232804	HSPA1B	B4E3B6; hsa:3303; hsa:3304; P08107; P0DMV9; P19790; Q5JQI4; Q5SP17; Q9UQL9; Q9UQM0	Apoptosis modulation and signaling; Parkin-ubiquitin proteasomal system pathway; MAPK signaling pathway; Apoptosis modulation by HSP70; VEGFA-VEGFR2 signaling; Measles virus infection	Regulation of HSF1-mediated heat shock response; Neutrophil degranulation; HSP90 chaperone cycle for steroid hormone receptors (SHR) in the presence of ligand; PKR-mediated signaling; Attenuation phase	12	1	0.92	0.876169	0.989685	53.96	102.3	97.7	10.93	41.78	High	High	High	High	High	High	1
TRUE	High	Master Protein	P01024	Complement C3 [OS=Homo sapiens]	0	515.212	64	81	608	81	1663	187	6.4	1687.09	81	cell organization and biogenesis;other metabolic processes;stress response;developmental processes;signal transduction;other biological processes	non-structural extracellular;plasma membrane;other membranes;ER/Golgi;other cytoplasmic organelle;other cell component	signal transduction activity or receptor binding;enzyme regulator activity	Pf00207, Pf01759, Pf01821, Pf01835, Pf07677, Pf07678, Pf07703, Pf17789, Pf17790, Pf17791, Pf21308, Pf21406	718	ENSG00000125730	C3	A7E236; hsa:718; P01024	Allograft rejection; Complement system; Dengue-2 interactions with complement and coagulation cascades; TYROBP causal network in microglia; Cells and molecules involved in local acute inflammatory response ; 16p11.2 distal deletion syndrome; Complement system in neuronal development and plasticity; Acquired partial lipodystrophy / Barraquer-Simons syndrome; Complement-mediated inflammation of pul…	Immunoregulatory interactions between a Lymphoid and a non-Lymphoid cell; Regulation of Complement cascade; G alpha (i) signalling events; Neutrophil degranulation; Peptide ligand-binding receptors; Regulation of Insulin-like Growth Factor (IGF) transport and uptake by Insulin-like Growth Factor Binding Proteins (IGFBPs); Post-translational protein phosphorylation; Purinergic signaling in leishma…	22	0	0.432	0.0126245	0.140521	99.96	62	138	23.15	67.24	High	High	High	High	High	High	1
FALSE	High	Master Protein	P04179	Superoxide dismutase [Mn], mitochondrial [OS=Homo sapiens]	0	146.115	80	12	599	12	222	24.7	8.25	1691.26	12	cell organization and biogenesis;other metabolic processes;stress response;developmental processes;signal transduction;other biological processes	mitochondrion	nucleic acid binding activity;other molecular function	Pf00081, Pf02777	6648	ENSG00000291237	SOD2	B2R7R1; B3KUK2; B4DL20; B4E3K9; E1P5A9; P04179; P78434; Q16792; Q5TCM1; Q96EE6; Q9P2Z3	Selenium micronutrient network; Vitamin B12 metabolism; Folate metabolism; VEGFA-VEGFR2 signaling; Oxidative stress response	FOXO-mediated transcription of oxidative stress, metabolic and neuronal genes; Gene and protein expression by JAK-STAT signaling after Interleukin-12 stimulation; Detoxification of Reactive Oxygen Species; Transcriptional activation of mitochondrial biogenesis; Deregulated CDK5 triggers multiple neurodegenerative pathways in Alzheimer's disease models	10	0	1.037	0.562757	0.925611	98.12	123.7	76.3	46.55	77.19	High	High	High	High	High	High	1
FALSE	High	Master Protein	P30086	Phosphatidylethanolamine-binding protein 1 [OS=Homo sapiens]	0	170.286	82	14	597	14	187	21	7.53	1829.56	14	other biological processes	cytosol	enzyme regulator activity;other molecular function	Pf01161	5037	ENSG00000089220	PEBP1	B2R4S1; hsa:5037; P30086	Pancreatic adenocarcinoma pathway; EGF/EGFR signaling pathway	Signaling by BRAF and RAF1 fusions; Signaling by moderate kinase activity BRAF mutants; Paradoxical activation of RAF signaling by kinase inactive BRAF; Signaling downstream of RAS mutants; MAP2K and MAPK activation; Negative regulation of MAPK pathway; Signaling by high-kinase activity BRAF mutants	9	0	0.704	0.434271	0.888519	57.74	98.1	101.9	29.22	41.07	High	High	High	High	High	High	1
FALSE	High	Master Protein	P35609	Alpha-actinin-2 [OS=Homo sapiens]	0	421.662	71	60	586	41	894	103.8	5.45	1542.38	60	cell adhesion;cell organization and biogenesis;developmental processes;signal transduction;other biological processes	non-structural extracellular;plasma membrane;other membranes;cytosol;cytoskeleton;other cell component	signal transduction activity or receptor binding;cytoskeletal activity;other molecular function	Pf00307, Pf00435, Pf08726	88	ENSG00000077522	ACTN2	B1ANE4; B2RCS5; hsa:88; P35609; Q86TF4; Q86TI8	Arrhythmogenic right ventricular cardiomyopathy; Striated muscle contraction pathway; NO/cGMP/PKG mediated neuroprotection; 10q22q23 copy number variation	Platelet degranulation ; RAF/MAP kinase cascade; Ras activation upon Ca2+ influx through NMDA receptor; Unblocking of NMDA receptors, glutamate binding and activation; Negative regulation of NMDA receptor-mediated neuronal transmission; Long-term potentiation; Assembly and cell surface presentation of NMDA receptors; Nephrin family interactions; Striated Muscle Contraction	13	20	0.705	0.436828	0.889722	81.9	103	97	60.78	38.86	High	High	High	High	High	High	1
FALSE	High	Master Protein	P18206	Vinculin [OS=Homo sapiens]	0	371.76	59	63	575	63	1134	123.7	5.66	1593.32	63	cell adhesion;cell organization and biogenesis;developmental processes;other biological processes	non-structural extracellular;plasma membrane;other membranes;cytosol;cytoskeleton;other cell component	cytoskeletal activity;other molecular function	Pf01044	7414	ENSG00000035403	VCL	hsa:7414; P18206; Q16450; Q5SWX2; Q7Z3B8; Q8IXU7	Integrin-mediated cell adhesion; Primary focal segmental glomerulosclerosis (FSGS); Focal adhesion; VEGFA-VEGFR2 signaling; MFAP5 effect on permeability and motility of endothelial cells via cytoskeleton rearrangement; Melanoma; Regulation of actin cytoskeleton	Neutrophil degranulation; Platelet degranulation ; Signaling by BRAF and RAF1 fusions; Signaling by ALK fusions and activated point mutants; Smooth Muscle Contraction; Signaling by moderate kinase activity BRAF mutants; Paradoxical activation of RAF signaling by kinase inactive BRAF; Signaling downstream of RAS mutants; Signaling by RAF1 mutants; MAP2K and MAPK activation; Signaling by high-kinas…	18	0	1.188	0.292042	0.786378	48.35	113.5	86.5	25.38	6.83	High	High	High	High	High	High	1
FALSE	High	Master Protein	P63316	Troponin C, slow skeletal and cardiac muscles [OS=Homo sapiens]	0	150.459	87	14	574	14	161	18.4	4.18	1639.66	14	developmental processes;other biological processes	cytosol;cytoskeleton	cytoskeletal activity;other molecular function	Pf13499, Pf13833	7134	ENSG00000114854	TNNC1	hsa:7134; O14800; P02590; P04463; P63316	MFAP5-mediated ovarian cancer cell motility and invasiveness; Striated muscle contraction pathway	Striated Muscle Contraction	3	0	0.74	0.544812	0.920196	64.2	81.4	118.6	34.94	36.05	High	High	High	High	High	High	1	Acetyl [N-Term]
FALSE	High	Master Protein	P00568	Adenylate kinase isoenzyme 1 [OS=Homo sapiens]	0	190.1	74	17	572	17	194	21.6	8.63	1806.72	17	other metabolic processes	cytosol;cytoskeleton;other cell component	kinase activity;other molecular function	Pf00406	203	ENSG00000106992	AK1	hsa:203; P00568; Q9BVK9; Q9UQC7		Interconversion of nucleotide di- and triphosphates	1	0	0.726	0.501498	0.90517	70.21	86	114	3.92	49.78	High	High	High	High	High	High	1
FALSE	High	Master Protein	P11021	Endoplasmic reticulum chaperone BiP [OS=Homo sapiens]	0	272.663	53	34	566	32	654	72.3	5.16	1731.32	34	protein metabolism;other metabolic processes;stress response;transport;developmental processes;signal transduction;other biological processes	plasma membrane;other membranes;cytosol;mitochondrion;ER/Golgi;nucleus;other cell component	translation activity;other molecular function	Pf00012	3309	ENSG00000044574	HSPA5	B0QZ61; hsa:3309; P11021; Q2EF78; Q9NPF1; Q9UK02	Parkin-ubiquitin proteasomal system pathway; Apoptosis-related network due to altered Notch3 in ovarian cancer; Photodynamic therapy-induced unfolded protein response; Prion disease pathway; Unfolded protein response; Orexin receptor pathway	Regulation of HSF1-mediated heat shock response; Platelet degranulation ; Antigen Presentation: Folding, assembly and peptide loading of class I MHC; ATF6B (ATF6-beta) activates chaperones; IRE1alpha activates chaperones; PERK regulates gene expression; ATF6 (ATF6-alpha) activates chaperone genes	14	2	0.932	0.838245	0.980797	66.94	90.9	109.1	29.02	27.62	High	High	High	High	High	High	1
FALSE	High	Master Protein	Q13813	Spectrin alpha chain, non-erythrocytic 1 [OS=Homo sapiens]	0	573.661	58	115	565	115	2472	284.4	5.35	1490.13	115	cell organization and biogenesis	non-structural extracellular;plasma membrane;other membranes;cytosol;cytoskeleton;other cell component	cytoskeletal activity;other molecular function	Pf00018, Pf00435, Pf08726, Pf13499	6709	ENSG00000197694	SPTAN1	hsa:6709; Q13186; Q13813; Q15324; Q16606; Q59EF1; Q5VXV5; Q5VXV6; Q7Z6M5; Q9P0V0	Fas ligand pathway and stress induction of heat shock proteins	Neutrophil degranulation; COPI-mediated anterograde transport; Sensory processing of sound by inner hair cells of the cochlea; Sensory processing of sound by outer hair cells of the cochlea; Interaction between L1 and Ankyrins; RHOV GTPase cycle; RHOU GTPase cycle; Nephrin family interactions; RAF/MAP kinase cascade; NCAM signaling for neurite out-growth; Caspase-mediated cleavage of cytoskeletal…	12	0	0.772	0.647646	0.942187	56.25	85.9	114.1	29.03	25.76	High	High	High	High	High	High	1
FALSE	High	Master Protein	Q06830	Peroxiredoxin-1 [OS=Homo sapiens]	0	212.949	83	18	564	16	199	22.1	8.13	1603.29	18	cell cycle OR cell proliferation;other metabolic processes;stress response;developmental processes;other biological processes	cytosol;nucleus;other cell component	other molecular function	Pf00578, Pf10417	5052	ENSG00000117450	PRDX1	B5BU26; D3DPZ8; hsa:5052; P35703; Q06830; Q2V576; Q5T154; Q5T155	Androgen receptor signaling pathway; Selenium micronutrient network; Nuclear receptors meta-pathway; NRF2 pathway; HDAC6 interactions in the central nervous system	Detoxification of Reactive Oxygen Species; TP53 Regulates Metabolic Genes; NFE2L2 regulating anti-oxidant/detoxification enzymes; Deregulated CDK5 triggers multiple neurodegenerative pathways in Alzheimer's disease models	9	2	0.946	0.79815	0.972357	89.2	100.2	99.8	10.61	108.29	High	High	High	High	High	High	1
FALSE	High	Master Protein	P32119	Peroxiredoxin-2 [OS=Homo sapiens]	0	151.735	83	18	553	17	198	21.9	5.97	1545.39	18	cell cycle OR cell proliferation;other metabolic processes;stress response;developmental processes;signal transduction;other biological processes	cytosol;other cell component	other molecular function	Pf00578, Pf10417	7001	ENSG00000167815	PRDX2	A8K0C0; hsa:7001; P31945; P32118; P32119; P35701; Q6FHG4; Q92763; Q9UC23	Selenium micronutrient network; VEGFA-VEGFR2 signaling; HDAC6 interactions in the central nervous system	TP53 Regulates Metabolic Genes; Detoxification of Reactive Oxygen Species; Deregulated CDK5 triggers multiple neurodegenerative pathways in Alzheimer's disease models	6	0	1.472	0.0706566	0.417506	84.03	115.3	84.7	30.73	74.83	High	High	High	High	High	High	1
FALSE	High	Master Protein	P14618	Pyruvate kinase PKM [OS=Homo sapiens]	0	299.149	64	31	537	31	531	57.9	7.84	1558.28	31	cell organization and biogenesis;other metabolic processes;other biological processes	non-structural extracellular;cytosol;ER/Golgi;nucleus;other cell component	nucleic acid binding activity;kinase activity;other molecular function	Pf00224, Pf02887	5315	ENSG00000067225	PKM	A6NFK3; B2R5N8; B3KRY0; B4DFX8; B4DUU6; hsa:5315; P14618; P14786; Q53GK4; Q96E76; Q9BWB5; Q9UCV6; Q9UPF2	Photodynamic therapy-induced HIF-1 survival signaling; Amino acid metabolism; Clear cell renal cell carcinoma pathways; Metabolic reprogramming in colon cancer; Aerobic glycolysis; Glycolysis in senescence; Glucose metabolism in triple-negative breast cancer cells; Glycolysis and gluconeogenesis; Metabolic Epileptic Disorders	Neutrophil degranulation	10	0	0.604	0.18775	0.674239	53.2	72.4	127.6	34.04	12.34	High	High	High	High	High	High	1
FALSE	High	Master Protein	P09382	Galectin-1 [OS=Homo sapiens]	0	69.74	50	8	532	8	135	14.7	5.5	1222.52	8	cell adhesion;other biological processes	cytosol;ER/Golgi;other cell component	other molecular function	Pf00337	3956	ENSG00000100097	LGALS1	B2R5E8; hsa:3956; P09382; Q9UDK5	Immune infiltration in pancreatic cancer	Regulation of Insulin-like Growth Factor (IGF) transport and uptake by Insulin-like Growth Factor Binding Proteins (IGFBPs); Post-translational protein phosphorylation	3	0	0.941	0.811772	0.974118	75.89	103.3	96.7	2.14	45.63	High	High	High	High	High	High	1
FALSE	High	Master Protein	Q9NPC6	Myozenin-2 [OS=Homo sapiens]	0	201.124	80	19	523	19	264	29.9	8.25	1400.59	19	cell organization and biogenesis;other biological processes	cytoskeleton	cytoskeletal activity;other molecular function	Pf05556	51778	ENSG00000172399	MYOZ2	hsa:51778; O43415; Q9HB92; Q9NPC6			0	0	0.754	0.59005	0.929111	56.63	101.9	98.1	38.58	36.42	High	High	High	High	High	High	1	Acetyl [N-Term]
FALSE	High	Master Protein	P01857	Immunoglobulin heavy constant gamma 1 [OS=Homo sapiens]	0	201.156	64	16	520	7	330	36.1	8.19	1476.59	16				Pf07654							0	11	1.656	0.0263741	0.223917	82.05	109	91	41.5	67.69	High	High	High	High	High	High	1
FALSE	High	Master Protein	P35579	Myosin-9 [OS=Homo sapiens]	0	484.529	49	87	516	68	1960	226.4	5.6	1447.7	87	cell cycle OR cell proliferation;cell organization and biogenesis;protein metabolism;stress response;transport;developmental processes;signal transduction;other biological processes	plasma membrane;other membranes;cytosol;cytoskeleton;nucleus;other cell component	signal transduction activity or receptor binding;cytoskeletal activity;other molecular function	Pf00063, Pf01576, Pf02736	4627	ENSG00000100345	MYH9	A8K6E4; hsa:4627; O60805; P35579; Q60FE2; Q86T83	Primary focal segmental glomerulosclerosis (FSGS); VEGFA-VEGFR2 signaling; Nephrotic syndrome; HDAC6 interactions in the central nervous system	Regulation of actin dynamics for phagocytic cup formation; FCGR3A-mediated phagocytosis; Translocation of SLC2A4 (GLUT4) to the plasma membrane; RHO GTPases activate PAKs; Sensory processing of sound by inner hair cells of the cochlea; Sensory processing of sound by outer hair cells of the cochlea; Signaling by ALK fusions and activated point mutants; RHO GTPases activate CIT; EPHA-mediated growt…	17	7	0.96	0.759178	0.969611	70.56	95.2	104.8	35.32	31.6	High	High	High	High	High	High	1
FALSE	High	Master Protein	P00558	Phosphoglycerate kinase 1 [OS=Homo sapiens]	0	242.516	65	22	512	22	417	44.6	8.1	1451.81	22	protein metabolism;other metabolic processes;stress response;other biological processes	non-structural extracellular;other membranes;cytosol	kinase activity;other molecular function	Pf00162	5230	ENSG00000102144	PGK1	A8K4W6; B7Z7A9; hsa:5230; P00558; Q5J7W1; Q6IBT6; Q8NI87	Cori cycle; Photodynamic therapy-induced HIF-1 survival signaling; VEGFA-VEGFR2 signaling; Clear cell renal cell carcinoma pathways; Metabolic reprogramming in colon cancer; Aerobic glycolysis; Glycolysis in senescence; Warburg effect modulated by deubiquitinating enzymes and their substrates; Glycolysis and gluconeogenesis; Metabolic Epileptic Disorders	Glycolysis; Gluconeogenesis; Manipulation of host energy metabolism	13	0	1.196	0.280814	0.781135	91.81	120.6	79.4	38.94	78.73	High	High	High	High	High	High	1
FALSE	High	Master Protein	P13929	Beta-enolase [OS=Homo sapiens]	0	211.686	66	21	505	16	434	47	7.71	1627.04	21	other metabolic processes	plasma membrane;other membranes;cytosol	other molecular function	Pf00113, Pf03952	2027	ENSG00000108515	ENO3	B4DUI6; B4DUM6; D3DTL2; E7ENK8; hsa:2027; P13929; Q96AE2	Clear cell renal cell carcinoma pathways; Glycolysis and gluconeogenesis; Metabolic Epileptic Disorders	Glycolysis; Gluconeogenesis	5	1	0.516	0.061046	0.379906	63.51	77.4	122.6	33.05	11.6	High	High	High	High	High	High	1
FALSE	High	Master Protein	Q15149	Plectin [OS=Homo sapiens]	0	523.416	33	134	502	134	4684	531.5	5.96	1188.33	134	cell cycle OR cell proliferation;cell organization and biogenesis;other metabolic processes;stress response;developmental processes;other biological processes	plasma membrane;other membranes;cytosol;cytoskeleton;mitochondrion;other cell component	cytoskeletal activity;other molecular function	Pf00307, Pf00681, Pf03501, Pf17902, Pf18373, Pf21019, Pf21020, Pf21097	5339	ENSG00000178209	PLEC	hsa:5339; Q15148; Q15149; Q16640; Q6S376; Q6S377; Q6S378; Q6S379; Q6S380; Q6S381; Q6S382; Q6S383	Envelope proteins and their potential roles in EDMD physiopathology	Assembly of collagen fibrils and other multimeric structures; Caspase-mediated cleavage of cytoskeletal proteins; Type I hemidesmosome assembly	4	0	1.037	0.563005	0.925611	55.21	95.3	104.7	16.73	35.11	High	High	High	High	High	High	1
FALSE	High	Master Protein	P54296	Myomesin-2 [OS=Homo sapiens]	0	424.658	66	74	496	74	1465	164.8	6.19	1304.03	74	cell organization and biogenesis;developmental processes;other biological processes	cytoskeleton;other cell component	other molecular function	Pf00041, Pf07679	9172	ENSG00000036448; ENSG00000274137	MYOM2	hsa:9172; P54296; Q7Z3Y2			0	0	0.565	0.120416	0.569227	58.47	69.2	130.8	33.53	20.12	High	High	High	High	High	High	1
TRUE	High	Master Protein	P02774	Vitamin D-binding protein [OS=Homo sapiens]	0	302.244	73	30	493	30	474	52.9	5.45	1403.67	30	other metabolic processes;transport	non-structural extracellular;cytosol;other cytoplasmic organelle;other cell component	transporter activity;cytoskeletal activity;other molecular function	Pf00273, Pf09164	2638	ENSG00000145321	GC	B4DPP2; D6RAK8; hsa:2638; P02774; Q16309; Q16310; Q53F31; Q6GTG1	Vitamin D metabolism	Vitamin D (calciferol) metabolism	2	0	0.42	0.00951328	0.117127	94.4	47.4	152.6	19.38	66.62	High	High	High	High	High	High	1
TRUE	High	Master Protein	P12109	Collagen alpha-1(VI) chain [OS=Homo sapiens]	0	294.942	46	38	488	38	1028	108.5	5.43	1374.73	38	cell adhesion;developmental processes;other biological processes	non-structural extracellular;plasma membrane;other membranes;ER/Golgi;other cell component	extracellular structural activity;other molecular function	Pf00092, Pf01391	1291	ENSG00000142156	COL6A1	hsa:1291; O00117; O00118; P12109; Q14040; Q14041; Q16258; Q7Z645; Q9BSA8	miRNA targets in ECM and membrane receptors; PI3K-Akt signaling pathway	Collagen degradation; Signaling by PDGF; Assembly of collagen fibrils and other multimeric structures; Integrin cell surface interactions; ECM proteoglycans; NCAM1 interactions; Collagen chain trimerization	10	0	2.501	0.000244661	0.00539111	108.17	153.4	46.6	90.51	73.23	High	High	High	High	High	High	1
FALSE	High	Master Protein	P07954	Fumarate hydratase, mitochondrial [OS=Homo sapiens]	0	226.724	64	22	486	22	510	54.6	8.76	1472.87	22	DNA metabolism;other metabolic processes;stress response;other biological processes	cytosol;mitochondrion;nucleus;other cell component	other molecular function	Pf00206, Pf10415	2271	ENSG00000091483	FH	B1ANK7; hsa:2271; P07954	TCA cycle and deficiency of pyruvate dehydrogenase complex (PDHc); Amino acid metabolism; Krebs cycle disorders; Type 2 papillary renal cell carcinoma; Metabolic reprogramming in colon cancer; TCA cycle in senescence; TCA cycle (aka Krebs or citric acid cycle)	Citric acid cycle (TCA cycle); Mitochondrial protein degradation	9	0	1.149	0.348798	0.835129	76.36	115.2	84.8	49.33	61.39	High	High	High	High	High	High	1
FALSE	High	Master Protein	P10606	Cytochrome c oxidase subunit 5B, mitochondrial [OS=Homo sapiens]	0	99.299	67	11	482	11	129	13.7	8.81	1263.47	11	other metabolic processes;transport;other biological processes	other membranes;mitochondrion	transporter activity;other molecular function	Pf01215	1329	ENSG00000135940; ENSG00000291596	COX5B	hsa:1329; P10606; Q53YB7; Q96J18; Q99610	Electron transport chain: OXPHOS system in mitochondria; Nonalcoholic fatty liver disease; Mitochondrial complex IV assembly; 5q35 copy number variation	Respiratory electron transport; TP53 Regulates Metabolic Genes; Cytoprotection by HMOX1; Mitochondrial protein degradation	8	0	0.705	0.437896	0.889722	79.18	97.3	102.7	48.05	39.61	High	High	High	High	High	High	1
FALSE	High	Master Protein	Q01995	Transgelin [OS=Homo sapiens]	0	171.053	86	22	471	22	201	22.6	8.84	1203.21	22	other biological processes	other cell component	cytoskeletal activity	Pf00307, Pf00402	6876	ENSG00000149591	TAGLN	hsa:6876; O15542; Q01995	Burn wound healing		1	0	0.635	0.253076	0.752687	79.59	93	107	63.85	28	High	High	High	High	High	High	1
FALSE	High	Master Protein	P30044	Peroxiredoxin-5, mitochondrial [OS=Homo sapiens]	0	130.194	71	14	469	14	214	22.1	8.7	1367.35	14	other metabolic processes;stress response;other biological processes	cytosol;mitochondrion;nucleus;other cytoplasmic organelle;other cell component	signal transduction activity or receptor binding;enzyme regulator activity;nucleic acid binding activity;other molecular function	Pf08534	25824	ENSG00000126432	PRDX5	A6NC19; A6NG06; B7ZLJ4; B7ZVW3; hsa:25824; P30044; Q14CK0; Q6IAF2; Q9UBU5; Q9UJU4; Q9UKX4	Selenium micronutrient network		1	0	0.8	0.73937	0.963173	75.48	119.1	80.9	40.52	64.48	High	High	High	High	High	High	1
TRUE	High	Master Protein	P00450	Ceruloplasmin [OS=Homo sapiens]	0	382.902	53	43	463	43	1065	122.1	5.72	1252.78	43	transport		other molecular function	Pf00394, Pf07731, Pf07732	1356		CP	A5PL27; hsa:1356			0	0	0.448	0.0179699	0.178742	101.47	63.4	136.6	57.17	72.22	High	High	High	High	High	High	1
FALSE	High	Master Protein	P67936	Tropomyosin alpha-4 chain [OS=Homo sapiens]	0	116.116	68	22	458	10	248	28.5	4.69	963.6	22	cell organization and biogenesis;other biological processes	cytosol;cytoskeleton	cytoskeletal activity;other molecular function	Pf00261	7171	ENSG00000167460	TPM4	hsa:7171; P07226; P67936; Q15659; Q5U0D9; Q9BU85; Q9H8Q3; Q9UCS1; Q9UCS2; Q9UCS3; Q9UCS4	Striated muscle contraction pathway	Signaling by ALK fusions and activated point mutants; RHOV GTPase cycle; Smooth Muscle Contraction; Striated Muscle Contraction	5	0	1.045	0.544688	0.920196	77.47	103.8	96.2	68.49	71.16	High	High	High	High	High	High	1
FALSE	High	Master Protein	P24752	Acetyl-CoA acetyltransferase, mitochondrial [OS=Homo sapiens]	0	229.751	70	23	456	23	427	45.2	8.85	1305.34	23	other metabolic processes;stress response;developmental processes;other biological processes	mitochondrion;ER/Golgi	other molecular function	Pf00108, Pf02803	38	ENSG00000075239	ACAT1	B2R6H1; G3XAB4; hsa:38; P24752; Q96FG8	Fatty acid beta-oxidation; Tryptophan metabolism; SARS-CoV-2 and COVID-19 pathway	Mitochondrial protein degradation; Branched-chain amino acid catabolism; Utilization of Ketone Bodies; Synthesis of Ketone Bodies	7	0	1.127	0.385125	0.861945	87.13	131	69	54.84	81.95	High	High	High	High	High	High	1
FALSE	High	Master Protein	O76041	Nebulette [OS=Homo sapiens]	0	368.548	60	59	452	59	1014	116.4	7.99	1204.99	59	cell organization and biogenesis;developmental processes	cytoskeleton	cytoskeletal activity;other molecular function	Pf00880, Pf14604	10529	ENSG00000078114	NEBL	B0YJ45; B9EIM9; E9PRX7; hsa:10529; O76041; Q2TBD0; Q5VZT2; Q70I54; Q9UIC4			0	0	0.768	0.632483	0.939954	80.35	108.4	91.6	11.05	73.35	High	High	High	High	High	High	1
FALSE	High	Master Protein	P48681	Nestin [OS=Homo sapiens]	0	372.31	52	65	449	65	1621	177.3	4.36	1258.51	65	cell cycle OR cell proliferation;cell organization and biogenesis;developmental processes;other biological processes	cytoskeleton;other cell component	signal transduction activity or receptor binding;other molecular function	Pf00038	10763	ENSG00000132688	NES	hsa:10763; O00552; P48681; Q3LIF5; Q5SYZ6	Cell lineage map for neuronal differentiation		1	0	0.892	0.959184	0.997481	83.65	94.3	105.7	62.58	29.59	High	High	High	High	High	High	1	Acetyl [N-Term]
FALSE	High	Master Protein	P13804	Electron transfer flavoprotein subunit alpha, mitochondrial [OS=Homo sapiens]	0	176.44	71	16	445	16	333	35.1	8.38	1296.15	16	other metabolic processes	mitochondrion;other cell component	other molecular function	Pf00766, Pf01012	2108	ENSG00000140374	ETFA	B4DT43; hsa:2108; P13804; Q53XN3		Respiratory electron transport	1	0	1.198	0.277758	0.779056	94.55	139.4	60.6	48.62	68.4	High	High	High	High	High	High	1
FALSE	High	Master Protein	P11310	Medium-chain specific acyl-CoA dehydrogenase, mitochondrial [OS=Homo sapiens]	0	161.638	61	23	445	23	421	46.6	8.37	1323.88	23	other metabolic processes;stress response;developmental processes;other biological processes	other membranes;mitochondrion;other cell component	other molecular function	Pf00441, Pf02770, Pf02771	34	ENSG00000117054	ACADM	hsa:34; P11310; Q5T4U4; Q9NYF1	Fatty acid beta-oxidation; PPAR-alpha pathway; Nuclear receptors meta-pathway; Mitochondrial long chain fatty acid beta-oxidation; Amino acid metabolism; PPAR signaling pathway; Mitochondrial fatty acid oxidation disorders; Female steroid hormones in cardiomyocyte energy metabolism; Sudden infant death syndrome (SIDS) susceptibility pathways	PPARA activates gene expression; mitochondrial fatty acid beta-oxidation of unsaturated fatty acids; Beta oxidation of decanoyl-CoA to octanoyl-CoA-CoA; Beta oxidation of octanoyl-CoA to hexanoyl-CoA	13	0	1.471	0.0712597	0.419775	67.35	129.5	70.5	44.71	49.83	High	High	High	High	High	High	1
FALSE	High	Master Protein	P02545	Prelamin-A/C [OS=Homo sapiens]	0	313.39	70	50	441	49	664	74.1	7.02	1207.43	50	cell cycle OR cell proliferation;cell organization and biogenesis;other metabolic processes;stress response;transport;developmental processes;other biological processes	cytosol;cytoskeleton;nucleus;other cell component	cytoskeletal activity;other molecular function	Pf00038, Pf00932	4000	ENSG00000160789	LMNA	B4DI32; D3DVB0; D6RAQ3; E7EUI9; hsa:4000; P02545; P02546; Q5I6Y4; Q5I6Y6; Q5TCJ2; Q5TCJ3; Q6UYC3; Q969I8; Q96JA2	Arrhythmogenic right ventricular cardiomyopathy; Adipogenesis; Fas ligand pathway and stress induction of heat shock proteins; Lamin A processing pathway; Nephrotic syndrome; Influence of laminopathies on Wnt signaling; Overlap between signal transduction pathways contributing to LMNA laminopathies; Familial partial lipodystrophy; Progeria-associated lipodystrophy; Acquired partial lipodystrophy …	Signaling by BRAF and RAF1 fusions; XBP1(S) activates chaperone genes	14	1	1.816	0.0109582	0.129105	86.37	131.4	68.6	41.34	80.94	High	High	High	High	High	High	1	Acetyl [N-Term]
FALSE	High	Master Protein	P19429	Troponin I, cardiac muscle [OS=Homo sapiens]	0	95.883	42	11	435	11	210	24	9.86	1042.56	11	developmental processes;signal transduction;other biological processes	cytosol;cytoskeleton	cytoskeletal activity;other molecular function	Pf00992, Pf11636	7137	ENSG00000129991	TNNI3	hsa:7137; P19429	Cardiac progenitor differentiation; Striated muscle contraction pathway	Ion homeostasis; Striated Muscle Contraction	4	0	1.042	0.552603	0.923641	65.56	103.6	96.4	39.56	19.59	High	High	High	High	High	High	1
FALSE	High	Master Protein	P02763	Alpha-1-acid glycoprotein 1 [OS=Homo sapiens]	0	79.737	45	9	431	6	201	23.5	5.11	853.03	9	stress response;other biological processes	non-structural extracellular;other cell component		Pf00061	5004	ENSG00000229314	ORM1	B7ZKQ5; hsa:5004; P02763; Q5T539; Q5U067; Q8TC16	Vitamin D receptor pathway	Neutrophil degranulation; Platelet degranulation	3	0	0.73	0.512645	0.906359	99.24	81.2	118.8	84.14	59.76	High	High	High	High	High	High	1
TRUE	High	Master Protein	P21810	Biglycan [OS=Homo sapiens]	0	156.667	52	17	429	16	368	41.6	7.52	1290.63	17	developmental processes	non-structural extracellular;extracellular matrix;plasma membrane;other membranes;ER/Golgi;other cytoplasmic organelle;other cell component	extracellular structural activity;other molecular function	Pf01462, Pf13855	633	ENSG00000182492	BGN	D3DWU3; hsa:633; P13247; P21810		ECM proteoglycans; A tetrasaccharide linker sequence is required for GAG synthesis; Defective B4GALT7 causes EDS, progeroid type; Defective B3GAT3 causes JDSSDHD; Defective B3GALT6 causes EDSP2 and SEMDJL1; Chondroitin sulfate biosynthesis; Dermatan sulfate biosynthesis; CS/DS degradation; Defective CHST3 causes SEDCJD; Defective CHST14 causes EDS, musculocontractural type; Defective CHSY1 causes…	11	1	0.477	0.0315094	0.255073	88.16	64.8	135.2	49.82	64.15	High	High	High	High	High	High	1
FALSE	High	Master Protein	P07737	Profilin-1 [OS=Homo sapiens]	0	105.379	67	9	428	9	140	15	8.27	967.09	9	cell organization and biogenesis;developmental processes;other biological processes	cytosol;cytoskeleton;nucleus;other cell component	cytoskeletal activity;other molecular function	Pf00235	5216	ENSG00000108518	PFN1	hsa:5216; P07737; Q53Y44	Physico-chemical features and toxicity-associated pathways; VEGFA-VEGFR2 signaling; Burn wound healing; Regulation of actin cytoskeleton; G13 signaling pathway	Platelet degranulation ; RHO GTPases Activate Formins; PCP/CE pathway; Signaling by ROBO receptors	9	0	0.935	0.829528	0.978558	58.18	100.5	99.5	39.12	45.34	High	High	High	High	High	High	1
FALSE	High	Master Protein	Q99497	Parkinson disease protein 7 [OS=Homo sapiens]	0	183.453	78	15	428	15	189	19.9	6.79	1356.87	15	cell-cell signaling;cell organization and biogenesis;protein metabolism;DNA metabolism;other metabolic processes;stress response;transport;signal transduction;other biological processes	plasma membrane;other membranes;cytosol;mitochondrion;ER/Golgi;nucleus;other cell component	signal transduction activity or receptor binding;enzyme regulator activity;nucleic acid binding activity;other molecular function	Pf01965	11315	ENSG00000116288	PARK7	B2R4Z1; hsa:11315; O14805; Q6DR95; Q7LFU2; Q99497	Androgen receptor signaling pathway; Synaptic vesicle pathway; Parkinson's disease pathway; HDAC6 interactions in the central nervous system	Late endosomal microautophagy; Aggrephagy; SUMOylation of transcription cofactors; Chaperone Mediated Autophagy	8	0	0.768	0.634491	0.939954	76.3	107.7	92.3	48.71	47.02	High	High	High	High	High	High	1
FALSE	High	Master Protein	P07195	L-lactate dehydrogenase B chain [OS=Homo sapiens]	0	162.443	55	18	425	17	334	36.6	6.05	1275.67	18	other metabolic processes	other membranes;cytosol;mitochondrion;other cell component	other molecular function	Pf00056, Pf02866	3945	ENSG00000111716	LDHB	hsa:3945; P07195	Clear cell renal cell carcinoma pathways; CCL18 signaling pathway; Glycolysis and gluconeogenesis; Metabolic Epileptic Disorders	Pyruvate metabolism	5	1	0.548	0.096294	0.499606	54.53	75.6	124.4	28.54	7.05	High	High	High	High	High	High	1
FALSE	High	Master Protein	P05091	Aldehyde dehydrogenase, mitochondrial [OS=Homo sapiens]	0	222.193	52	28	423	24	517	56.3	7.05	1167.28	28	other metabolic processes;other biological processes	mitochondrion	other molecular function	Pf00171	217	ENSG00000111275	ALDH2	B4DW54; E7EUE5; hsa:217; P05091; Q03639; Q6IB13; Q6IV71	Fatty acid omega-oxidation; Ethanol effects on histone modifications; Tryptophan metabolism; Fluoroacetic acid toxicity	Mitochondrial protein degradation; Smooth Muscle Contraction; Ethanol oxidation; Metabolism of serotonin	8	4	0.941	0.812513	0.974118	52.2	107.4	92.6	22.13	24.25	High	High	High	High	High	High	1
FALSE	High	Master Protein	P30101	Protein disulfide-isomerase A3 [OS=Homo sapiens]	0	263.653	61	32	423	32	505	56.7	6.35	1247.1	32	cell adhesion;cell organization and biogenesis;protein metabolism;other metabolic processes;stress response;signal transduction;other biological processes	non-structural extracellular;other membranes;ER/Golgi;other cytoplasmic organelle;other cell component	other molecular function	Pf00085, Pf13848	2923	ENSG00000167004	PDIA3	hsa:2923; P30101; Q13453; Q14255; Q8IYF8; Q9UMU7	Prion disease pathway	ER-Phagosome pathway; Antigen Presentation: Folding, assembly and peptide loading of class I MHC; Calnexin/calreticulin cycle	4	0	0.947	0.795973	0.972357	75.41	114.8	85.2	30.28	68.78	High	High	High	High	High	High	1
FALSE	High	Master Protein	O94875	Sorbin and SH3 domain-containing protein 2 [OS=Homo sapiens]	0	219.794	31	27	423	26	1100	124	8.31	1183.08	27	cell organization and biogenesis;developmental processes;signal transduction	plasma membrane;other membranes;cytoskeleton;nucleus;other cell component	cytoskeletal activity;other molecular function	Pf00018, Pf02208, Pf14604	8470	ENSG00000154556	SORBS2	A6NEK9; B3KPQ7; B7Z1G5; B7Z3X6; C9JKV9; D3DP62; D3DP63; E9PAS5; E9PAW4; G3XAI0; H7BXR4; hsa:8470; J3KNZ5; O60592; O60593; O94875; Q96EX0	Extracellular vesicles in the crosstalk of cardiac cells		1	0	1.637	0.0291899	0.239846	69.65	133.7	66.3	41.11	51.8	High	High	High	High	High	High	1
FALSE	High	Master Protein	Q9Y490	Talin-1 [OS=Homo sapiens]	0	440.134	48	85	422	77	2541	269.6	6.07	1172.71	85	cell adhesion;cell organization and biogenesis;signal transduction;other biological processes	non-structural extracellular;plasma membrane;other membranes;cytosol;cytoskeleton;other cell component	signal transduction activity or receptor binding;cytoskeletal activity;other molecular function	Pf00373, Pf01608, Pf08913, Pf09141, Pf16511, Pf21692	7094	ENSG00000137076	TLN1	A0A1S5UZ07; A6NMY0; hsa:7094; Q86YD0; Q9NZQ2; Q9UHH8; Q9UPX3; Q9Y490	Integrin-mediated cell adhesion; Primary focal segmental glomerulosclerosis (FSGS); Focal adhesion; TROP2 regulatory signaling	Platelet degranulation ; p130Cas linkage to MAPK signaling for integrins; Signaling by BRAF and RAF1 fusions; XBP1(S) activates chaperone genes; SEMA3A-Plexin repulsion signaling by inhibiting Integrin adhesion; Smooth Muscle Contraction; Signaling by moderate kinase activity BRAF mutants; Paradoxical activation of RAF signaling by kinase inactive BRAF; Signaling downstream of RAS mutants; Signal…	18	8	1.175	0.309637	0.802164	60.8	109	91	8.08	39.75	High	High	High	High	High	High	1
TRUE	High	Master Protein	P02749	Beta-2-glycoprotein 1 [OS=Homo sapiens]	0	187.774	65	17	421	17	345	38.3	7.97	1334.82	17	protein metabolism;other metabolic processes;stress response;transport;other biological processes	non-structural extracellular;other cell component	enzyme regulator activity;other molecular function	Pf00084, Pf09014	350	ENSG00000091583	APOH	B2R9M3; hsa:350; P02749; Q9UCN7	Cholesterol metabolism	Platelet degranulation	2	0	0.442	0.0157161	0.161332	84.16	52.1	147.9	18.94	54.18	High	High	High	High	High	High	1
FALSE	High	Master Protein	P14543	Nidogen-1 [OS=Homo sapiens]	0	251.825	43	38	418	38	1247	136.3	5.29	1186.06	38	cell adhesion;cell-cell signaling;cell organization and biogenesis;developmental processes;signal transduction;other biological processes	non-structural extracellular;extracellular matrix;other cell component	extracellular structural activity;other molecular function	Pf00058, Pf00086, Pf06119, Pf07474, Pf07645, Pf12662, Pf12947, Pf14670	4811	ENSG00000116962	NID1	hsa:4811; P14543; Q14942; Q59FL2; Q5TAF2; Q5TAF3; Q86XD7		Degradation of the extracellular matrix; Laminin interactions	2	0	0.81	0.773431	0.97229	69.68	100.7	99.3	43.55	42.75	High	High	High	High	High	High	1
TRUE	High	Master Protein	P12277	Creatine kinase B-type [OS=Homo sapiens]	0	241.51	67	19	413	18	381	42.6	5.59	1334.94	19	other metabolic processes	non-structural extracellular;plasma membrane;other membranes;cytosol;mitochondrion	kinase activity;other molecular function	Pf00217, Pf02807	1152	ENSG00000166165	CKB	A8K236; B2R5R4; hsa:1152; P12277; Q2LE07; Q6FG40; Q9UC66		RND3 GTPase cycle; Creatine metabolism	2	0	0.443	0.0160165	0.163976	51.56	74.8	125.2	31.64	17.33	High	High	High	High	High	High	1
FALSE	High	Master Protein	Q6S8J3	POTE ankyrin domain family member E [OS=Homo sapiens]	0	97.48	10	10	412	1	1075	121.3	6.2	1047.27	10	cell organization and biogenesis;developmental processes;other biological processes	other membranes;cytoskeleton;other cell component	cytoskeletal activity;other molecular function	Pf00022, Pf12796, Pf14915	445582	ENSG00000188219	POTEE	hsa:445582; Q6S8J3; Q6S8J4; Q6S8J5; Q6S8J8	2q21.1 copy number variation syndrome	RHOF GTPase cycle	2	0	1.147	0.479643	0.900712	79.29	134.5	65.5	11.55	62.75	High	Peak Found	High	High	Peak Found	Peak Found	1
FALSE	High	Master Protein	P31930	Cytochrome b-c1 complex subunit 1, mitochondrial [OS=Homo sapiens]	0	231.214	63	25	408	25	480	52.6	6.37	1291.67	25	other metabolic processes;transport;other biological processes	other membranes;mitochondrion	transporter activity;other molecular function	Pf00675, Pf05193	7384	ENSG00000010256	UQCRC1	B2R7R8; hsa:7384; P31930; Q96DD2	Electron transport chain: OXPHOS system in mitochondria; Nonalcoholic fatty liver disease; Mitochondrial complex III assembly	Respiratory electron transport	4	0	0.835	0.854037	0.985251	78.28	109.2	90.8	59.35	55.58	High	High	High	High	High	High	1
FALSE	High	Master Protein	Q14112	Nidogen-2 [OS=Homo sapiens]	0	322.122	43	45	408	45	1375	151.2	5.29	1158.56	45	cell adhesion;cell organization and biogenesis	non-structural extracellular;extracellular matrix;plasma membrane;other membranes	extracellular structural activity;other molecular function	Pf00058, Pf00086, Pf06119, Pf07474, Pf12662, Pf12947	22795	ENSG00000087303	NID2	A8K6I7; B4DU19; hsa:22795; O43710; Q14112		Laminin interactions	1	0	1.141	0.360827	0.841189	66.8	103.5	96.5	37.14	17.24	High	High	High	High	High	High	1
FALSE	High	Master Protein	P09622	Dihydrolipoyl dehydrogenase, mitochondrial [OS=Homo sapiens]	0	180.118	43	19	404	19	509	54.1	7.85	1180.25	19	protein metabolism;other metabolic processes;developmental processes;other biological processes	cytoskeleton;mitochondrion;nucleus;other cytoplasmic organelle;other cell component	other molecular function	Pf02852, Pf07992	1738	ENSG00000091140	DLD	B2R5X0; B4DHG0; B4DT69; hsa:1738; P09622; Q14131; Q14167; Q59EV8; Q8WTS4	Fatty acid beta-oxidation; TCA cycle and deficiency of pyruvate dehydrogenase complex (PDHc); Amino acid metabolism; Tryptophan metabolism; 7q11.23 copy number variation syndrome; Neuroinflammation and glutamatergic signaling; Glycolysis and gluconeogenesis; 10q11.21q11.23 copy number variation syndrome; Metabolic Epileptic Disorders; TCA cycle (aka Krebs or citric acid cycle)	Lysine catabolism; Regulation of pyruvate dehydrogenase (PDH) complex; Signaling by Retinoic Acid; Citric acid cycle (TCA cycle); Branched-chain amino acid catabolism; Mitochondrial protein degradation; Glycine degradation	19	0	0.998	0.656686	0.943863	74	96	104	65.7	33.84	High	High	High	High	High	High	1
TRUE	High	Master Protein	P02751	Fibronectin [OS=Homo sapiens]	0	419.733	39	59	403	59	2477	272.2	5.5	1199.06	59	cell adhesion;cell organization and biogenesis;protein metabolism;other metabolic processes;stress response;developmental processes;signal transduction;other biological processes	non-structural extracellular;extracellular matrix;plasma membrane;other membranes;ER/Golgi;other cell component	signal transduction activity or receptor binding;enzyme regulator activity;other molecular function	Pf00039, Pf00040, Pf00041	2335	ENSG00000115414	FN1	B7ZLF0; E9PE77; E9PG29; hsa:2335; O95609; O95610; P02751; Q14312; Q14325; Q14326; Q17RV7; Q53S27; Q564H7; Q585T2; Q59EH1; Q60FE4; Q68DP8; Q68DP9; Q68DT4; Q6LDP6; Q6MZS0; Q6MZU5; Q6N025; Q6N0A6; Q7Z391; Q86T27; Q8IVI8; Q96KP7; Q96KP8; Q96KP9; Q9H1B8; Q9HAP3; Q9UMK2	Mammary gland development pathway - Puberty (Stage 2 of 4); miRNA targets in ECM and membrane receptors; Focal adhesion; Overview of nanoparticle effects; RAC1/PAK1/p38/MMP2 pathway; TGF-beta signaling pathway; Interactions between LOXL4 and oxidative stress pathway; Physico-chemical features and toxicity-associated pathways; TGF-beta signaling in thyroid cells for epithelial-mesenchymal transiti…	Platelet degranulation ; Cell surface interactions at the vascular wall; Degradation of the extracellular matrix; Integrin cell surface interactions; ECM proteoglycans; GPER1 signaling; Signaling by BRAF and RAF1 fusions; Regulation of Insulin-like Growth Factor (IGF) transport and uptake by Insulin-like Growth Factor Binding Proteins (IGFBPs); Post-translational protein phosphorylation; ALK muta…	51	0	0.497	0.0450126	0.321799	83	56.2	143.8	43.07	61.32	High	High	High	High	High	High	1
FALSE	High	Master Protein	P20674	Cytochrome c oxidase subunit 5A, mitochondrial [OS=Homo sapiens]	0	88.862	48	8	401	8	150	16.8	6.79	1122.54	8	other metabolic processes;transport	other membranes;mitochondrion	transporter activity;other molecular function	Pf02284	9377	ENSG00000178741	COX5A	hsa:9377; P20674; P30045; Q8TB65	Electron transport chain: OXPHOS system in mitochondria; Nonalcoholic fatty liver disease; Mitochondrial complex IV assembly; 5q35 copy number variation; Arachidonate epoxygenase / epoxide hydrolase	Respiratory electron transport; Mitochondrial protein degradation; TP53 Regulates Metabolic Genes; Cytoprotection by HMOX1	9	0	0.617	0.212905	0.700895	74.76	82.1	117.9	50.05	45.27	High	High	High	High	High	High	1
TRUE	High	Master Protein	P01859	Immunoglobulin heavy constant gamma 2 [OS=Homo sapiens]	0	144.183	55	12	399	4	326	35.9	7.59	1116.1	12											0	0	2.142	0.00178883	0.0297801	85.27	156.8	43.2	38.03	89.38	High	High	High	High	High	High	1
TRUE	High	Master Protein	P40939	Trifunctional enzyme subunit alpha, mitochondrial [OS=Homo sapiens]	0	280.391	60	38	397	38	763	82.9	9.04	1070.68	38	other metabolic processes;other biological processes	other membranes;mitochondrion	other molecular function	Pf00378, Pf00725, Pf02737	3030	ENSG00000084754	HADHA	B2R7L4; B4DYP2; hsa:3030; P40939; Q16679; Q53T69; Q53TA2; Q96GT7; Q9UQC5	Fatty acid beta-oxidation; Mitochondrial long chain fatty acid beta-oxidation; Valproic acid pathway; Mitochondrial fatty acid oxidation disorders; Sudden infant death syndrome (SIDS) susceptibility pathways	Acyl chain remodeling of CL; mitochondrial fatty acid beta-oxidation of unsaturated fatty acids; Beta oxidation of decanoyl-CoA to octanoyl-CoA-CoA; Beta oxidation of octanoyl-CoA to hexanoyl-CoA; Beta oxidation of hexanoyl-CoA to butanoyl-CoA; Beta oxidation of myristoyl-CoA to lauroyl-CoA; Beta oxidation of lauroyl-CoA to decanoyl-CoA-CoA; Beta oxidation of palmitoyl-CoA to myristoyl-CoA	13	0	0.484	0.0361921	0.278832	103.21	109.4	90.6	71.13	85.79	High	High	High	High	High	High	1
FALSE	High	Master Protein	P07339	Cathepsin D [OS=Homo sapiens]	0	166.395	41	14	394	14	412	44.5	6.54	1151.79	14	cell organization and biogenesis;protein metabolism;other metabolic processes;other biological processes	other membranes;other cytoplasmic organelle;other cell component	other molecular function	Pf00026, Pf07966	1509	ENSG00000117984	CTSD	hsa:1509; P07339; Q6IB57	Prolactin signaling pathway; 8p23.1 copy number variation syndrome	MHC class II antigen presentation; Collagen degradation; Neutrophil degranulation; Estrogen-dependent gene expression; Insulin receptor recycling; Metabolism of Angiotensinogen to Angiotensins	8	0	1.339	0.140181	0.61343	83.32	128.6	71.4	36.92	54.68	High	High	High	High	High	High	1
FALSE	High	Master Protein	P24043	Laminin subunit alpha-2 [OS=Homo sapiens]	0	409.208	35	76	385	76	3122	343.7	6.4	963.41	76	cell adhesion;cell organization and biogenesis;developmental processes;other biological processes	non-structural extracellular;extracellular matrix;plasma membrane;other membranes;other cell component	signal transduction activity or receptor binding;other molecular function	Pf00052, Pf00053, Pf00054, Pf00055, Pf02210, Pf06008, Pf06009	3908	ENSG00000196569	LAMA2	P24043; Q14736; Q5VUM2; Q93022	Arrhythmogenic right ventricular cardiomyopathy; Alpha 6 beta 4 signaling pathway; Focal adhesion; Focal adhesion: PI3K-Akt-mTOR-signaling pathway; PI3K-Akt signaling pathway; Acute viral myocarditis; Small cell lung cancer; Pleural mesothelioma; Orexin receptor pathway	ECM proteoglycans; Non-integrin membrane-ECM interactions; Laminin interactions; MET activates PTK2 signaling; EGR2 and SOX10-mediated initiation of Schwann cell myelination	14	0	0.747	0.567104	0.928581	67.18	92.2	107.8	48.68	39.4	High	High	High	High	High	High	1
FALSE	High	Master Protein	Q9BX66	Sorbin and SH3 domain-containing protein 1 [OS=Homo sapiens]	0	311.203	48	56	384	55	1292	142.4	6.84	1005.86	56	cell adhesion;cell organization and biogenesis;signal transduction;other biological processes	plasma membrane;other membranes;cytosol;cytoskeleton;nucleus;other cell component	signal transduction activity or receptor binding;cytoskeletal activity;other molecular function	Pf00018, Pf02208, Pf07653, Pf14604	10580	ENSG00000095637	SORBS1	A0AED4; A6NEK3; A6NID8; A6NJS4; A7MD40; D3DR42; hsa:10580; O43857; Q5T923; Q5T924; Q5T927; Q5T928; Q5T929; Q5T930; Q5T931; Q5T932; Q7LBE5; Q8IVK0; Q8IVQ4; Q96KF3; Q96KF4; Q9BX64; Q9BX65; Q9BX66; Q9P2Q0; Q9UFT2; Q9UHN7; Q9Y338	Integrin-mediated cell adhesion; PPAR signaling pathway; Insulin signaling	Smooth Muscle Contraction	4	1	0.987	0.685977	0.952994	69.43	118.4	81.6	17.34	54.3	High	High	High	High	High	High	1
FALSE	High	Master Protein	P42765	3-ketoacyl-CoA thiolase, mitochondrial [OS=Homo sapiens]	0	230.203	78	24	384	24	397	41.9	8.09	1203.22	24	cell organization and biogenesis;other metabolic processes;stress response;transport	mitochondrion	other molecular function	Pf00108, Pf02803	10449	ENSG00000167315	ACAA2	hsa:10449; P42765; Q9BUT6	Fatty acid biosynthesis	Mitochondrial Fatty Acid Beta-Oxidation	2	0	1.726	0.0180213	0.178766	67.78	143.1	56.9	35.04	34.04	High	High	High	High	High	High	1
FALSE	High	Master Protein	P00505	Aspartate aminotransferase, mitochondrial [OS=Homo sapiens]	0	225.003	68	28	381	28	430	47.5	9.01	1051.95	28	other metabolic processes;transport;other biological processes	plasma membrane;other membranes;mitochondrion	other molecular function	Pf00155	2806	ENSG00000125166	GOT2	B4DJA6; E7ERW2; hsa:2806; P00505; Q53FL3; Q9BWA3	Alanine and aspartate metabolism; Amino acid metabolism; Metabolic reprogramming in colon cancer; NAD metabolism in oncogene-induced senescence and mitochondrial dysfunction-associated senescence; Glycolysis and gluconeogenesis; Metabolic Epileptic Disorders	Glyoxylate metabolism and glycine degradation; Gluconeogenesis; Aspartate and asparagine metabolism; Glutamate and glutamine metabolism; Degradation of cysteine and homocysteine	11	0	0.706	0.439908	0.892164	74.43	100	100	54.1	54.3	High	High	High	High	High	High	1
FALSE	High	Master Protein	Q13011	Delta(3,5)-Delta(2,4)-dienoyl-CoA isomerase, mitochondrial [OS=Homo sapiens]	0	151.045	66	17	375	17	328	35.8	8	1032.68	17	other metabolic processes	cytosol;mitochondrion;other cytoplasmic organelle	other molecular function	Pf00378	1891	ENSG00000104823; ENSG00000282853	ECH1	A8K745; hsa:1891; Q13011; Q8WVX0; Q96EZ9	Fatty acid biosynthesis; IL-18 signaling pathway	Mitochondrial protein degradation; Peroxisomal protein import	4	0	1.146	0.353223	0.836472	70.69	114.6	85.4	53.14	13.52	High	High	High	High	High	High	1
FALSE	High	Master Protein	P01023	Alpha-2-macroglobulin [OS=Homo sapiens]	0	377.744	54	59	374	52	1474	163.2	6.46	1006.55	59	stress response;developmental processes;other biological processes	non-structural extracellular;other cell component	signal transduction activity or receptor binding;enzyme regulator activity;other molecular function	Pf00207, Pf01835, Pf07677, Pf07678, Pf07703, Pf17789, Pf17791	2	ENSG00000175899	A2M	hsa:2; P01023; Q13677; Q59F47; Q5QTS0; Q68DN2; Q6PIY3; Q6PN97	Complement system; Dengue-2 interactions with complement and coagulation cascades; Complement and coagulation cascades	Degradation of the extracellular matrix; Platelet degranulation ; HDL assembly; Intrinsic Pathway of Fibrin Clot Formation	7	7	0.894	0.953447	0.996892	102.01	95.4	104.6	31.04	103.27	High	High	High	High	High	High	1
FALSE	High	Master Protein	Q96Q06	Perilipin-4 [OS=Homo sapiens]	0	357.812	63	54	366	54	1357	134.3	8.73	968.44	54											0	0	1.388	0.109593	0.538681	70.06	113	87	8.97	61.26	High	High	High	High	High	High	1
FALSE	High	Master Protein	P04217	Alpha-1B-glycoprotein [OS=Homo sapiens]	0	174.299	58	18	364	18	495	54.2	5.86	1086.66	18		non-structural extracellular;plasma membrane;other membranes;other cell component		Pf13895	1	ENSG00000121410	A1BG	A8K052; hsa:1; P04217; Q68CK0; Q8IYJ6; Q96P39	Network map of SARS-CoV-2 signaling pathway	Neutrophil degranulation; Platelet degranulation	3	0	0.954	0.775653	0.97229	65	91	109	27.77	38.98	High	High	High	High	High	High	1
FALSE	High	Master Protein	P30041	Peroxiredoxin-6 [OS=Homo sapiens]	0	156.112	68	23	364	23	224	25	6.38	950.44	23	other metabolic processes;stress response;other biological processes	non-structural extracellular;cytosol;mitochondrion;nucleus;other cytoplasmic organelle;other cell component	other molecular function	Pf00578, Pf10417	9588	ENSG00000117592	PRDX6	A8JZY7; hsa:9588; P30041; P32077; Q5TAH4; Q5ZEZ8	Nuclear receptors meta-pathway; NRF2 pathway; VEGFA-VEGFR2 signaling	Neutrophil degranulation; Detoxification of Reactive Oxygen Species	5	0	0.763	0.61822	0.937983	61.32	95.7	104.3	12.08	46.36	High	High	High	High	High	High	1
FALSE	High	Master Protein	P14927	Cytochrome b-c1 complex subunit 7 [OS=Homo sapiens]	0	78.787	57	10	362	10	111	13.5	8.78	1024.59	10	other metabolic processes	other membranes;mitochondrion		Pf02271	7381	ENSG00000156467	UQCRB	E5RJU0; hsa:7381; P14927; Q6FGD1	Electron transport chain: OXPHOS system in mitochondria; Nonalcoholic fatty liver disease; Mitochondrial complex III assembly	Respiratory electron transport	4	0	0.938	0.821029	0.976866	72.75	98.8	101.2	40.58	31.86	High	High	High	High	High	High	1
FALSE	High	Master Protein	P17174	Aspartate aminotransferase, cytoplasmic [OS=Homo sapiens]	0	185.35	74	23	362	23	413	46.2	7.01	1062.24	23	other metabolic processes;signal transduction;other biological processes	cytosol;other cell component	other molecular function	Pf00155	2805	ENSG00000120053	GOT1	B2R6R7; B7Z7E9; hsa:2805; P17174; Q5VW80	Alanine and aspartate metabolism; Trans-sulfuration pathway; Amino acid metabolism; NAD metabolism in oncogene-induced senescence and mitochondrial dysfunction-associated senescence; TCA cycle in senescence; Neuroinflammation and glutamatergic signaling; Glycolysis and gluconeogenesis; Metabolic Epileptic Disorders	Gluconeogenesis; Aspartate and asparagine metabolism; Methionine salvage pathway	11	0	0.688	0.389196	0.864402	53.31	97	103	15.94	8.9	High	High	High	High	High	High	1
FALSE	High	Master Protein	P16615	Sarcoplasmic/endoplasmic reticulum calcium ATPase 2 [OS=Homo sapiens]	0	273.417	46	44	361	44	1042	114.7	5.34	978.78	44	cell adhesion;cell organization and biogenesis;other metabolic processes;stress response;transport;signal transduction;other biological processes	plasma membrane;other membranes;cytosol;ER/Golgi;other cell component	transporter activity;nucleic acid binding activity;other molecular function	Pf00122, Pf00689, Pf00690, Pf00702, Pf13246	488	ENSG00000174437	ATP2A2	A6NDN7; B4DF05; hsa:488; P16614; P16615; Q86VJ2	Alzheimer's disease and miRNA effects; Arrhythmogenic right ventricular cardiomyopathy; Endothelin pathways; Myometrial relaxation and contraction pathways; Alzheimer's disease; Calcium regulation in cardiac cells	Ion homeostasis; Ion transport by P-type ATPases; Pre-NOTCH Processing in Golgi; Reduction of cytosolic Ca++ levels	10	0	0.502	0.049427	0.341496	84.47	77	123	57.66	65.8	High	High	High	High	High	High	1
FALSE	High	Master Protein	P68371	Tubulin beta-4B chain [OS=Homo sapiens]	0	234.589	73	26	359	1	445	49.8	4.89	1142.04	26	cell cycle OR cell proliferation;cell organization and biogenesis;stress response	non-structural extracellular;cytosol;cytoskeleton;other cytoplasmic organelle;other cell component	signal transduction activity or receptor binding;cytoskeletal activity;nucleic acid binding activity;other molecular function	Pf00091, Pf03953	10383	ENSG00000188229	TUBB4B	A2BFA2; hsa:10383; P05217; P68371	Alzheimer's disease and miRNA effects; Pathogenic Escherichia coli infection; Parkin-ubiquitin proteasomal system pathway; Alzheimer's disease	Neutrophil degranulation; Separation of Sister Chromatids; MHC class II antigen presentation; Resolution of Sister Chromatid Cohesion; HSP90 chaperone cycle for steroid hormone receptors (SHR) in the presence of ligand; RHO GTPases Activate Formins; COPI-mediated anterograde transport; COPI-independent Golgi-to-ER retrograde traffic; HCMV Early Events; Aggrephagy; EML4 and NUDC in mitotic spindle…	42	30	0.878	0.993758	0.999898	71.01	87.4	112.6	53.96	18.58	High	High	High	High	High	High	1
FALSE	High	Master Protein	P01861	Immunoglobulin heavy constant gamma 4 [OS=Homo sapiens]	0	134.33	61	13	358	7	327	35.9	7.36	937.68	13											0	2	1.333	0.144907	0.622027	90.58	106.9	93.1	39.09	62.12	High	High	High	High	High	High	1
FALSE	High	Master Protein	P09972	Fructose-bisphosphate aldolase C [OS=Homo sapiens]	0	195.322	68	23	357	19	364	39.4	6.87	1091.58	23	other metabolic processes;other biological processes	non-structural extracellular;cytosol;cytoskeleton;other cell component	cytoskeletal activity;other molecular function	Pf00274	230	ENSG00000109107	ALDOC	B2R5R3; hsa:230; P09972; Q3SYL3; Q6FH94; Q6P0L5	Clear cell renal cell carcinoma pathways; Glycolysis and gluconeogenesis; Metabolic Epileptic Disorders	Glycolysis; Gluconeogenesis; Neutrophil degranulation	6	0	0.886	0.980107	0.999898	89.44	115.8	84.2	37.24	94.78	High	High	High	High	High	High	1
FALSE	High	Master Protein	P20810	Calpastatin [OS=Homo sapiens]	0	320.796	62	37	357	37	708	76.5	5.07	1158.18	37	cell organization and biogenesis;other biological processes	other membranes;cytosol;ER/Golgi;other cell component	enzyme regulator activity	Pf00748	831	ENSG00000153113	CAST	B7Z468; G5E946; G5E9D3; hsa:831; O95360; P20810; Q05DE8; Q7Z4K0; Q96D08; Q9H1Z5		Degradation of the extracellular matrix; Deregulated CDK5 triggers multiple neurodegenerative pathways in Alzheimer's disease models	2	0	0.666	0.328952	0.822029	62.96	77.3	122.7	40.55	27.07	High	High	High	High	High	High	1
TRUE	High	Master Protein	P35555	Fibrillin-1 [OS=Homo sapiens]	0	519.663	38	79	354	76	2871	312.1	4.93	835.68	79	cell adhesion;developmental processes;signal transduction;other biological processes	non-structural extracellular;extracellular matrix;ER/Golgi	signal transduction activity or receptor binding;extracellular structural activity;other molecular function	Pf00683, Pf07645, Pf12661, Pf12662, Pf12947, Pf14670, Pf18193, Pf21364	2200	ENSG00000166147	FBN1	B2RUU0; D2JYH6; hsa:2200; P35555; Q15972; Q75N87	Hypothesized pathways in pathogenesis of cardiovascular disease; TGF-beta receptor signaling in skeletal dysplasias; 7q11.23 copy number variation syndrome; Progeria-associated lipodystrophy	Integrin cell surface interactions; Degradation of the extracellular matrix; Regulation of Insulin-like Growth Factor (IGF) transport and uptake by Insulin-like Growth Factor Binding Proteins (IGFBPs); Post-translational protein phosphorylation; Molecules associated with elastic fibres; TGF-beta receptor signaling activates SMADs	11	3	0.491	0.0408683	0.301512	117.88	73.7	126.3	93.56	136.72	High	High	High	High	High	High	1
FALSE	High	Master Protein	O15061	Synemin [OS=Homo sapiens]	0	305.878	48	59	350	59	1565	172.8	5.15	933.94	59	cell organization and biogenesis;other biological processes	plasma membrane;other membranes;cytoskeleton;other cell component	cytoskeletal activity;other molecular function	Pf00038	23336	ENSG00000182253	SYNM	A7E2Y2; hsa:23336; O15061; Q2TBJ4; Q5NJJ9; Q8TE61; Q8TE62			0	0	0.731	0.517428	0.90826	67.27	106.3	93.7	15.76	56.32	High	High	High	High	High	High	1
TRUE	High	Master Protein	P02766	Transthyretin [OS=Homo sapiens]	0	155.391	69	11	350	11	147	15.9	5.76	1200.56	11	other metabolic processes;signal transduction	non-structural extracellular;other cytoplasmic organelle	signal transduction activity or receptor binding;other molecular function	Pf00576	7276	ENSG00000118271	TTR	hsa:7276; P02766; Q549C7; Q6IB96; Q9UBZ6; Q9UCM9		Neutrophil degranulation; Amyloid fiber formation; Retinoid metabolism and transport; Non-integrin membrane-ECM interactions; The canonical retinoid cycle in rods (twilight vision); Retinoid cycle disease events	6	0	2.074	0.00260667	0.0410739	91.47	123.8	76.2	74.69	74.1	High	High	High	High	High	High	1
FALSE	High	Master Protein	P15259	Phosphoglycerate mutase 2 [OS=Homo sapiens]	0	183.508	75	17	348	13	253	28.7	8.88	980.89	17	other metabolic processes;signal transduction;other biological processes	cytosol	other molecular function	Pf00300	5224	ENSG00000164708	PGAM2	hsa:5224; P15259	Aerobic glycolysis; Glycolysis and gluconeogenesis; Metabolic Epileptic Disorders	Glycolysis; Gluconeogenesis	5	5	0.719	0.479027	0.900712	71.49	96.3	103.7	45.31	51.59	High	High	High	High	High	High	1
FALSE	High	Master Protein	P31948	Stress-induced-phosphoprotein 1 [OS=Homo sapiens]	0	199.387	51	30	342	30	543	62.6	6.8	889.33	30	other biological processes	cytosol;ER/Golgi;nucleus;other cell component	other molecular function	Pf00515, Pf13181, Pf17830	10963	ENSG00000168439	STIP1	B4DM70; F5H0T1; G3XAD8; hsa:10963; P31948; Q3ZCU9; Q5TZU9	VEGFA-VEGFR2 signaling	HSP90 chaperone cycle for steroid hormone receptors (SHR) in the presence of ligand; RND1 GTPase cycle	3	0	0.775	0.655557	0.943724	61.85	104.7	95.3	24.92	57.36	High	High	High	High	High	High	1	Acetyl [N-Term]
FALSE	High	Master Protein	P55809	Succinyl-CoA:3-ketoacid coenzyme A transferase 1, mitochondrial [OS=Homo sapiens]	0	187.247	58	23	341	23	520	56.1	7.46	1054.67	23	other metabolic processes	mitochondrion	other molecular function	Pf01144	5019	ENSG00000083720	OXCT1	B2R5V2; B7Z528; hsa:5019; P55809		Mitochondrial protein degradation; Utilization of Ketone Bodies	2	0	1.023	0.595704	0.931761	75.28	86.8	113.2	69.7	35.88	High	High	High	High	High	High	1
FALSE	High	Master Protein	Q8N3K9	Cardiomyopathy-associated protein 5 [OS=Homo sapiens]	0	352.005	26	72	339	72	4069	448.9	4.78	889.4	72		plasma membrane;other membranes;cytosol;cytoskeleton;ER/Golgi;nucleus;other cell component		Pf00041, Pf00622	202333	ENSG00000164309	CMYA5	A0PJB7; hsa:202333; Q05CT4; Q2NKX1; Q2T9G9; Q69YQ8; Q69YQ9; Q6P517; Q6P5U3; Q7Z4I1; Q86T34; Q86T49; Q8N3K9; Q8N3S4; Q8N3S7; Q8NAG8; Q9UK88			0	0	0.936	0.826316	0.9781	62.41	106.3	93.7	43.93	46.86	High	High	High	High	High	High	1
FALSE	High	Master Protein	Q562R1	Beta-actin-like protein 2 [OS=Homo sapiens]	0	65.111	22	6	339	1	376	42	5.59	799.02	6	cell organization and biogenesis;developmental processes;other biological processes	other membranes;cytoskeleton;other cell component	cytoskeletal activity;other molecular function	Pf00022	345651	ENSG00000169067	ACTBL2	B2RPJ1; hsa:345651; Q562R1; Q562R2; Q562S9; Q562X8			0	0	0.704	0.559474	0.925519	101.37	68.8	131.2	102.87	54.98	Peak Found	Peak Found	High	High	Peak Found	Peak Found	1
FALSE	High	Master Protein	P07437	Tubulin beta chain [OS=Homo sapiens]	0	231.893	73	26	338	5	444	49.6	4.89	1079.17	26	cell cycle OR cell proliferation;cell organization and biogenesis;stress response;transport;other biological processes	non-structural extracellular;other membranes;cytosol;cytoskeleton;nucleus;other cytoplasmic organelle;other cell component	signal transduction activity or receptor binding;cytoskeletal activity;other molecular function	Pf00091, Pf03953	203068	ENSG00000183311; ENSG00000196230; ENSG00000224156; ENSG00000227739; ENSG00000229684; ENSG00000232421; ENSG00000232575; ENSG00000235067	TUBB	hsa:203068; P05218; P07437; Q8WUC1; Q9CY33	Alzheimer's disease and miRNA effects; Pathogenic Escherichia coli infection; Parkin-ubiquitin proteasomal system pathway; Opioid receptor pathways; Alzheimer's disease; HDAC6 interactions in the central nervous system	Neutrophil degranulation; Recruitment of NuMA to mitotic centrosomes; Regulation of PLK1 Activity at G2/M Transition; Loss of Nlp from mitotic centrosomes; Recruitment of mitotic centrosome proteins and complexes; Anchoring of the basal body to the plasma membrane; AURKA Activation by TPX2; Potential therapeutics for SARS	15	2	0.719	0.538678	0.918359	80.56	85.7	114.3	62.61	31.51	High	High	High	High	High	High	1
FALSE	High	Master Protein	P27816	Microtubule-associated protein 4 [OS=Homo sapiens]	0	229.499	49	36	335	36	1152	120.9	5.43	829.02	36	cell cycle OR cell proliferation;cell organization and biogenesis;developmental processes;other biological processes	plasma membrane;other membranes;cytosol;cytoskeleton;other cell component	cytoskeletal activity;other molecular function	Pf00418	4134	ENSG00000047849	MAP4	P27816; Q13082; Q59FT2; Q68D74; Q6ZUW9; Q86V26; Q96A76; Q96NS9	Splicing factor NOVA regulated synaptic proteins; 2q37 copy number variation syndrome		2	0	0.698	0.41585	0.878747	77.15	88.5	111.5	42.52	45.65	High	High	High	High	High	High	1
FALSE	High	Master Protein	O00151	PDZ and LIM domain protein 1 [OS=Homo sapiens]	0	207.137	77	19	334	19	329	36	7.02	1054.67	19	cell organization and biogenesis;stress response;developmental processes;other biological processes	cytoskeleton;other cell component	cytoskeletal activity;other molecular function	Pf00412, Pf00595, Pf15936	9124	ENSG00000107438	PDLIM1	B2RBS6; hsa:9124; O00151; Q5VZH5; Q9BPZ9			0	0	1.032	0.57378	0.929111	63.13	99	101	41.55	65.16	High	High	High	High	High	High	1
FALSE	High	Master Protein	P23528	Cofilin-1 [OS=Homo sapiens]	0	144.969	71	19	331	14	166	18.5	8.09	917.13	19	cell cycle OR cell proliferation;cell organization and biogenesis;signal transduction;other biological processes	plasma membrane;other membranes;cytosol;cytoskeleton;nucleus;other cell component	cytoskeletal activity	Pf00241	1072	ENSG00000172757	CFL1	B3KUQ1; hsa:1072; P23528; Q53Y87; Q9UCA2	Brain-derived neurotrophic factor (BDNF) signaling pathway; VEGFA-VEGFR2 signaling; EGF/EGFR signaling pathway; Envelope proteins and their potential roles in EDMD physiopathology; 7q11.23 copy number variation syndrome; Neuroinflammation and glutamatergic signaling; CCL18 signaling pathway; Regulation of actin cytoskeleton; G13 signaling pathway	Platelet degranulation ; Regulation of actin dynamics for phagocytic cup formation; Gene and protein expression by JAK-STAT signaling after Interleukin-12 stimulation; EPHB-mediated forward signaling; Sema3A PAK dependent Axon repulsion; RHO GTPases Activate ROCKs	15	6	0.751	0.580266	0.929111	63.96	107.9	92.1	18.94	43.94	High	High	High	High	High	High	1
FALSE	High	Master Protein	P22626	Heterogeneous nuclear ribonucleoproteins A2/B1 [OS=Homo sapiens]	0	192.001	70	27	330	24	353	37.4	8.95	774.12	27	cell organization and biogenesis;RNA metabolism OR transcription;other metabolic processes;transport;other biological processes	non-structural extracellular;nucleus;other cell component	nucleic acid binding activity;other molecular function	Pf00076, Pf11627	3181	ENSG00000122566	HNRNPA2B1	A0A024RA27; A0A024RA61; A8K064; hsa:3181; P22626; P22627; Q9UC98; Q9UDJ2	mRNA processing	Gene and protein expression by JAK-STAT signaling after Interleukin-12 stimulation; mRNA Splicing - Major Pathway; Processing of Capped Intron-Containing Pre-mRNA	4	3	1.09	0.45209	0.898224	78.54	128.7	71.3	29.91	68.3	High	High	High	High	High	High	1
FALSE	High	Master Protein	P30084	Enoyl-CoA hydratase, mitochondrial [OS=Homo sapiens]	0	160.702	72	17	329	17	290	31.4	8.07	1048.87	17	other metabolic processes	mitochondrion	other molecular function	Pf00378	1892	ENSG00000127884	ECHS1	hsa:1892; O00739; P30084; Q5VWY1; Q96H54	Fatty acid beta-oxidation; Fatty acid biosynthesis; Ciliary landscape; Tryptophan metabolism	Branched-chain amino acid catabolism; Beta oxidation of decanoyl-CoA to octanoyl-CoA-CoA; Beta oxidation of octanoyl-CoA to hexanoyl-CoA; Beta oxidation of hexanoyl-CoA to butanoyl-CoA; Beta oxidation of butanoyl-CoA to acetyl-CoA; Beta oxidation of lauroyl-CoA to decanoyl-CoA-CoA	10	0	1.011	0.624073	0.937983	94.07	123.9	76.1	46.66	57.84	High	High	High	High	High	High	1
FALSE	High	Master Protein	P35580	Myosin-10 [OS=Homo sapiens]	0	354.581	43	72	329	54	1976	228.9	5.54	900.82	72	cell adhesion;cell cycle OR cell proliferation;cell organization and biogenesis;other biological processes	plasma membrane;other membranes;cytosol;cytoskeleton;other cell component	cytoskeletal activity;nucleic acid binding activity;other molecular function	Pf00063, Pf00612, Pf01576, Pf02736	4628	ENSG00000133026	MYH10	B2RWP9; D3DTS1; F8VTL3; hsa:4628; P35580; Q12989; Q149N3; Q149N4; Q16087; Q4LE45; Q6PK16; Q9BWG0	Regulation of actin cytoskeleton	EPHA-mediated growth cone collapse; RHO GTPases activate PAKs; RHO GTPases activate CIT; Sema4D induced cell migration and growth-cone collapse; RHO GTPases activate PKNs; RHO GTPases Activate ROCKs	7	1	0.512	0.0576033	0.366993	86.38	105.7	94.3	50.17	26.67	High	High	High	High	High	High	1
FALSE	High	Master Protein	P19652	Alpha-1-acid glycoprotein 2 [OS=Homo sapiens]	0	71.915	47	10	328	7	201	23.6	5.11	647.8	10	stress response;other biological processes	non-structural extracellular;other cytoplasmic organelle;other cell component		Pf00061	5005	ENSG00000228278	ORM2	B2R5L2; hsa:5005; P19652; Q16571; Q5T538; Q6IB74	Vitamin D receptor pathway	Neutrophil degranulation; Platelet degranulation	3	3	0.771	0.644696	0.941335	77.81	79.7	120.3	66.8	66.92	High	High	High	High	High	High	1
FALSE	High	Master Protein	P37802	Transgelin-2 [OS=Homo sapiens]	0	137.161	84	16	328	16	199	22.4	8.25	963.77	16	cell organization and biogenesis;other biological processes	non-structural extracellular;cytosol;cytoskeleton	cytoskeletal activity	Pf00307, Pf00402	8407	ENSG00000158710	TAGLN2	E9KL39; hsa:8407; P37802; Q5JRQ6; Q5JRQ7; Q6FGI1; Q9BUH5; Q9H4P0		Platelet degranulation	1	0	0.754	0.588997	0.929111	46.62	92.7	107.3	23.31	26.97	High	High	High	High	High	High	1
FALSE	High	Master Protein	P0DP23	Calmodulin-1 [OS=Homo sapiens]	0	78.69	79	11	325	11	149	16.8	4.22	790.04	11	cell cycle OR cell proliferation;cell organization and biogenesis;other metabolic processes;stress response;signal transduction;other biological processes	non-structural extracellular;plasma membrane;other membranes;cytosol;cytoskeleton;nucleus;other cell component	enzyme regulator activity;cytoskeletal activity;other molecular function	Pf13499	801; 805; 808	ENSG00000198668	CALM1	hsa:801; hsa:805; hsa:808; P02593; P0DP23; P62158; P70667; P99014; Q13942; Q53S29; Q61379; Q61380; Q96HK3	Physiological and pathological hypertrophy of the heart; MicroRNAs in cardiomyocyte hypertrophy; Alzheimer's disease and miRNA effects; Endothelin pathways; T cell receptor and co-stimulatory signaling; Common pathways underlying drug addiction; Cardiac hypertrophic response; Myometrial relaxation and contraction pathways; Melatonin metabolism and effects; G protein signaling pathways; T-cell ant…	Platelet degranulation ; Signaling by BRAF and RAF1 fusions; Signaling by moderate kinase activity BRAF mutants; Paradoxical activation of RAF signaling by kinase inactive BRAF; Signaling downstream of RAS mutants; Signaling by RAF1 mutants; FCERI mediated Ca+2 mobilization; FCGR3A-mediated IL10 synthesis; Antigen activates B Cell Receptor (BCR) leading to generation of second messengers; Stimuli…	80	0	0.9	0.936891	0.995934	71.67	88.2	111.8	45.78	12.04	High	High	High	High	High	High	1
TRUE	High	Master Protein	P07900	Heat shock protein HSP 90-alpha [OS=Homo sapiens]	0	248.261	55	37	324	23	732	84.6	5.02	907.45	37	cell organization and biogenesis;protein metabolism;DNA metabolism;other metabolic processes;stress response;transport;developmental processes;other biological processes	non-structural extracellular;extracellular matrix;plasma membrane;other membranes;cytosol;cytoskeleton;mitochondrion;nucleus;other cytoplasmic organelle;other cell component	signal transduction activity or receptor binding;enzyme regulator activity;cytoskeletal activity;nucleic acid binding activity;other molecular function	Pf00183, Pf13589	3320	ENSG00000080824	HSP90AA1	A8K500; B3KPJ9; hsa:3320; P07900; Q2PP14; Q5CAQ6; Q5CAQ7; Q9BVQ5	Nucleotide-binding oligomerization domain (NOD) pathway; TNF-alpha signaling pathway; Corticotropin-releasing hormone signaling pathway; Aryl hydrocarbon receptor pathway; Ebstein-Barr virus LMP1 signaling; Aryl hydrocarbon receptor pathway; Constitutive androstane receptor pathway; Pregnane X receptor pathway; Glucocorticoid receptor pathway; Nuclear receptors meta-pathway; NRF2 pathway; Photody…	Neutrophil degranulation; Regulation of actin dynamics for phagocytic cup formation; Potential therapeutics for SARS; The role of GTSE1 in G2/M progression after G2 checkpoint; HSP90 chaperone cycle for steroid hormone receptors (SHR) in the presence of ligand; Recruitment of NuMA to mitotic centrosomes; Aggrephagy; SARS-CoV-2 activates/modulates innate and adaptive immune responses; Regulation o…	71	14	0.384	0.00360316	0.0536828	79.04	52.8	147.2	67.91	42.85	High	High	High	High	High	High	1
FALSE	High	Master Protein	P52179	Myomesin-1 [OS=Homo sapiens]	0	347.865	53	66	322	66	1685	187.5	6.93	809.01	66	developmental processes;signal transduction;other biological processes	cytoskeleton	other molecular function	Pf00041, Pf07679	8736	ENSG00000101605	MYOM1	hsa:8736; P52179; Q14BD6; Q6H969; Q6ZUU0	Striated muscle contraction pathway		1	0	0.727	0.505062	0.90517	63.59	78.9	121.1	47.14	35.88	High	High	High	High	High	High	1
FALSE	High	Master Protein	P19404	NADH dehydrogenase [ubiquinone] flavoprotein 2, mitochondrial [OS=Homo sapiens]	0	126.316	53	13	320	13	249	27.4	8.06	934.49	13	other metabolic processes;transport;developmental processes	other membranes;mitochondrion	transporter activity;other molecular function	Pf01257	4729	ENSG00000178127	NDUFV2	hsa:4729; P19404; Q9BV41	Electron transport chain: OXPHOS system in mitochondria; Nonalcoholic fatty liver disease; Oxidative phosphorylation	Complex I biogenesis	5	0	0.804	0.754087	0.968139	74.32	101.7	98.3	46	52.72	High	High	High	High	High	High	1
TRUE	High	Master Protein	P15090	Fatty acid-binding protein, adipocyte [OS=Homo sapiens]	0	76.249	66	8	320	8	132	14.7	7.14	940.57	8	transport;other biological processes	cytosol;nucleus;other cell component	signal transduction activity or receptor binding;transporter activity;other molecular function	Pf00061	2167	ENSG00000170323	FABP4	hsa:2167; P15090; Q6IBA1	PPAR signaling pathway; FABP4 in ovarian cancer; Fatty acid transporters; Pleural mesothelioma; Familial partial lipodystrophy	Transcriptional regulation of white adipocyte differentiation; Triglyceride catabolism	7	0	2.108	0.00215774	0.0348607	85.28	121.3	78.7	62.53	52.38	High	High	High	High	High	High	1
TRUE	High	Master Protein	P12110	Collagen alpha-2(VI) chain [OS=Homo sapiens]	0	237.88	31	30	319	30	1019	108.5	6.21	939.76	30	cell adhesion;other biological processes	non-structural extracellular;plasma membrane;other membranes;ER/Golgi;other cell component	other molecular function	Pf00092, Pf01391	1292	ENSG00000142173	COL6A2	hsa:1292; P12110; Q13909; Q13910; Q13911; Q14048; Q14049; Q16259; Q16597; Q6P0Q1; Q9UML3; Q9Y4S8	miRNA targets in ECM and membrane receptors; Focal adhesion; Focal adhesion: PI3K-Akt-mTOR-signaling pathway; PI3K-Akt signaling pathway	ECM proteoglycans; Collagen degradation; Signaling by PDGF; Assembly of collagen fibrils and other multimeric structures; Integrin cell surface interactions; NCAM1 interactions; Collagen chain trimerization	12	0	2.862	3.47089e-05	0.00086863	112.67	151.7	48.3	85.1	76.06	High	High	High	High	High	High	1
FALSE	High	Master Protein	Q9H6N6	Putative uncharacterized protein MYH16 [OS=Homo sapiens]	0	37.193	4	5	317	2	1097	128.2	5.49	943.61	5		cytoskeleton		Pf01576			MYH16	Q9H6N6			0	0	1.581	0.0752466	0.435884	105.47	136.7	63.3	63.67	71.74	High	Peak Found	High	High	Not Found	High	1
FALSE	High	Master Protein	P12814	Alpha-actinin-1 [OS=Homo sapiens]	0	223.966	58	43	314	21	892	103	5.41	770.95	43	cell adhesion;cell organization and biogenesis;other biological processes	non-structural extracellular;plasma membrane;other membranes;cytosol;cytoskeleton;other cell component	signal transduction activity or receptor binding;cytoskeletal activity;nucleic acid binding activity;other molecular function	Pf00307, Pf00435, Pf08726	87	ENSG00000072110	ACTN1	B3V8S3; B4DHH3; B7TY16; hsa:87; P12814; Q1HE25; Q9BTN1	Arrhythmogenic right ventricular cardiomyopathy; Focal adhesion; Ebola virus infection in host; MFAP5 effect on permeability and motility of endothelial cells via cytoskeleton rearrangement; Regulation of actin cytoskeleton	Platelet degranulation ; Syndecan interactions; RHOD GTPase cycle; RHOF GTPase cycle; Nephrin family interactions; RHOBTB2 GTPase cycle; Regulation of cytoskeletal remodeling and cell spreading by IPP complex components	12	8	0.545	0.0932144	0.488929	71.27	69.7	130.3	41.41	47.44	High	High	High	High	High	High	1
FALSE	High	Master Protein	Q71U36	Tubulin alpha-1A chain [OS=Homo sapiens]	0	197.924	73	26	311	1	451	50.1	5.06	860.05	26	cell cycle OR cell proliferation;cell organization and biogenesis;other metabolic processes;transport;developmental processes;signal transduction;other biological processes	plasma membrane;other membranes;cytosol;cytoskeleton;other cytoplasmic organelle;other cell component	cytoskeletal activity;other molecular function	Pf00091, Pf03953	7846	ENSG00000167552	TUBA1A	A8K0B8; G3V1U9; hsa:7846; P04687; P05209; Q71U36	Alzheimer's disease and miRNA effects; Pathogenic Escherichia coli infection; Parkin-ubiquitin proteasomal system pathway; Alzheimer's disease; PAFAH1B1 copy number variation	Separation of Sister Chromatids; Resolution of Sister Chromatid Cohesion; RHO GTPases Activate Formins; EML4 and NUDC in mitotic spindle formation; Recycling pathway of L1; MHC class II antigen presentation; The role of GTSE1 in G2/M progression after G2 checkpoint; Formation of tubulin folding intermediates by CCT/TriC; Prefoldin mediated transfer of substrate to CCT/TriC; HCMV Early Events; Int…	42	26	0.9	0.935173	0.995934	75.72	98	102	46.76	28.33	Peak Found	Peak Found	Peak Found	Peak Found	High	Peak Found	1
FALSE	High	Master Protein	P11532	Dystrophin [OS=Homo sapiens]	0	295.781	25	74	308	74	3685	426.5	5.88	746.12	74	cell-cell signaling;cell organization and biogenesis;other metabolic processes;developmental processes;signal transduction;other biological processes	plasma membrane;other membranes;cytosol;cytoskeleton;nucleus;other cell component	cytoskeletal activity;other molecular function	Pf00307, Pf00397, Pf00435, Pf00569, Pf09068, Pf09069	1756	ENSG00000198947	DMD	A1L0U9; E7EQR9; E7EQS5; E7ESB2; E9PDN1; E9PDN5; F5GZY3; F8VX32; hsa:1756; P11532; Q02295; Q14169; Q14170; Q5JYU0; Q6NSJ9; Q7KZ48; Q8N754; Q9UCW3; Q9UCW4	Arrhythmogenic right ventricular cardiomyopathy; Ectoderm differentiation; Striated muscle contraction pathway; Acute viral myocarditis; Affected pathways in Duchenne muscular dystrophy; 13q12.12 copy number variation	Non-integrin membrane-ECM interactions; Striated Muscle Contraction	8	0	0.972	0.727075	0.960029	64.64	103.2	96.8	59.61	44.12	High	High	High	High	High	High	1
FALSE	High	Master Protein	P09104	Gamma-enolase [OS=Homo sapiens]	0	159.516	74	20	308	16	434	47.2	5.03	985.3	20	other metabolic processes	plasma membrane;other membranes;cytosol;other cell component	other molecular function	Pf00113, Pf03952	2026	ENSG00000111674	ENO2	B7Z2X9; hsa:2026; P09104; Q96J33	Clear cell renal cell carcinoma pathways; Glycolysis and gluconeogenesis; Metabolic Epileptic Disorders	Glycolysis; Gluconeogenesis	5	0	0.591	0.162468	0.653586	80.49	60.3	139.7	44.43	42.54	High	High	High	High	High	High	1
FALSE	High	Master Protein	P02671	Fibrinogen alpha chain [OS=Homo sapiens]	0	207.502	36	25	307	25	866	94.9	6.01	784.78	25	cell adhesion;cell organization and biogenesis;protein metabolism;other metabolic processes;stress response;other biological processes	non-structural extracellular;plasma membrane;other membranes;ER/Golgi;other cell component	signal transduction activity or receptor binding;other molecular function	Pf00147, Pf08702, Pf12160	2243	ENSG00000171560	FGA	A8K3E4; D3DP14; D3DP15; hsa:2243; P02671; Q4QQH7; Q9BX62; Q9UCH2	Selenium micronutrient network; Folate metabolism; Blood clotting cascade; Complement system; VEGFA-VEGFR2 signaling; Fibrin complement receptor 3 signaling pathway; COVID-19, thrombosis and anticoagulation; Network map of SARS-CoV-2 signaling pathway	ER-Phagosome pathway; Regulation of Insulin-like Growth Factor (IGF) transport and uptake by Insulin-like Growth Factor Binding Proteins (IGFBPs); Post-translational protein phosphorylation; Amyloid fiber formation; Integrin cell surface interactions; Platelet degranulation ; Signaling by BRAF and RAF1 fusions; MyD88:MAL(TIRAP) cascade initiated on plasma membrane; MyD88 deficiency (TLR2/4); IRAK…	29	0	0.875	0.985153	0.999898	75.22	110.1	89.9	35.97	57.08	High	High	High	High	High	High	1
FALSE	High	Master Protein	P04350	Tubulin beta-4A chain [OS=Homo sapiens]	0	189.587	66	22	306	2	444	49.6	4.88	938.91	22	cell cycle OR cell proliferation;cell organization and biogenesis;other biological processes	cytosol;cytoskeleton;other cell component	cytoskeletal activity;other molecular function	Pf00091, Pf03953	10382	ENSG00000104833	TUBB4A	B3KQP4; hsa:10382; P04350; Q969E5	Alzheimer's disease and miRNA effects; Pathogenic Escherichia coli infection; Parkin-ubiquitin proteasomal system pathway; Alzheimer's disease	Intraflagellar transport; Recycling pathway of L1; COPI-dependent Golgi-to-ER retrograde traffic; Separation of Sister Chromatids; The role of GTSE1 in G2/M progression after G2 checkpoint; Translocation of SLC2A4 (GLUT4) to the plasma membrane; Microtubule-dependent trafficking of connexons from Golgi to the plasma membrane; Gap junction assembly; MHC class II antigen presentation; Resolution of…	41	1	1.165	0.387081	0.862207	45.42	101.6	98.4	31.91	39.93	High	Peak Found	High	High	Peak Found	High	1
FALSE	High	Master Protein	Q01082	Spectrin beta chain, non-erythrocytic 1 [OS=Homo sapiens]	0	341.618	43	75	305	72	2364	274.4	5.57	786.3	75	cell cycle OR cell proliferation;cell organization and biogenesis;transport;developmental processes;other biological processes	plasma membrane;other membranes;cytosol;cytoskeleton;nucleus;other cell component	cytoskeletal activity;other molecular function	Pf00169, Pf00307, Pf00435	6711	ENSG00000115306	SPTBN1	B2RP63; hsa:6711; O60837; Q01082; Q16057; Q53R99; Q59ER3; Q8IX99	TGF-beta signaling pathway; Sudden infant death syndrome (SIDS) susceptibility pathways	RAF/MAP kinase cascade; NCAM signaling for neurite out-growth; Signaling by FLT3 fusion proteins; COPI-mediated anterograde transport; Sensory processing of sound by inner hair cells of the cochlea; Sensory processing of sound by outer hair cells of the cochlea; RHOV GTPase cycle; RHOU GTPase cycle; Nephrin family interactions; Interaction between L1 and Ankyrins	12	3	0.983	0.695636	0.955377	61.04	87.6	112.4	30.85	7.52	High	High	High	High	High	High	1
FALSE	High	Master Protein	P14854	Cytochrome c oxidase subunit 6B1 [OS=Homo sapiens]	0	81.296	76	8	305	8	86	10.2	7.05	826.92	8	other metabolic processes;transport	other membranes;mitochondrion	transporter activity	Pf02297	1340	ENSG00000126267	COX6B1	B2R5C9; hsa:1340; P14854; Q6IBL4	Electron transport chain: OXPHOS system in mitochondria; Nonalcoholic fatty liver disease; Mitochondrial complex IV assembly; 5q35 copy number variation	Respiratory electron transport; TP53 Regulates Metabolic Genes; Cytoprotection by HMOX1	7	0	0.649	0.287124	0.784184	46.34	79.1	120.9	39.9	43.71	High	High	High	High	High	High	1
FALSE	High	Master Protein	Q13885	Tubulin beta-2A chain [OS=Homo sapiens]	0	216.811	70	25	303	1	445	49.9	4.89	970.28	25	cell cycle OR cell proliferation;cell organization and biogenesis;developmental processes	cytoskeleton;other cell component	cytoskeletal activity;other molecular function	Pf00091, Pf03953	7280	ENSG00000137267	TUBB2A	hsa:7280; Q13885; Q6FGZ8; Q8IWR2	Alzheimer's disease and miRNA effects; Pathogenic Escherichia coli infection; Parkin-ubiquitin proteasomal system pathway; Alzheimer's disease	The role of GTSE1 in G2/M progression after G2 checkpoint; HSP90 chaperone cycle for steroid hormone receptors (SHR) in the presence of ligand; Recruitment of NuMA to mitotic centrosomes; Aggrephagy; MHC class II antigen presentation; Separation of Sister Chromatids; Resolution of Sister Chromatid Cohesion; RHO GTPases Activate Formins; HCMV Early Events; EML4 and NUDC in mitotic spindle formatio…	35	4	1.065	0.498434	0.903802	63.78	90.8	109.2	28.24	22.95	High	High	High	High	Peak Found	High	1
FALSE	High	Master Protein	P38117	Electron transfer flavoprotein subunit beta [OS=Homo sapiens]	0	120.231	58	16	302	16	255	27.8	8.1	820.07	16	other metabolic processes	mitochondrion;other cell component	other molecular function	Pf01012	2109	ENSG00000105379	ETFB	A8K766; B3KNY2; hsa:2109; P38117; Q6IBH7; Q71RF6; Q9Y3S7		Respiratory electron transport; Protein methylation	2	0	1.337	0.141625	0.614553	83.84	126.6	73.4	50.07	71.3	High	High	High	High	High	High	1
FALSE	High	Master Protein	Q9BVA1	Tubulin beta-2B chain [OS=Homo sapiens]	0	215.65	70	25	300	1	445	49.9	4.89	962.88	25	cell cycle OR cell proliferation;cell organization and biogenesis;developmental processes;other biological processes	cytoskeleton;other cell component	cytoskeletal activity;other molecular function	Pf00091, Pf03953	347733	ENSG00000137285	TUBB2B	A8K068; hsa:347733; Q9BVA1	Alzheimer's disease and miRNA effects; Pathogenic Escherichia coli infection; Parkin-ubiquitin proteasomal system pathway; Alzheimer's disease	MHC class II antigen presentation; Translocation of SLC2A4 (GLUT4) to the plasma membrane; Recruitment of NuMA to mitotic centrosomes; Separation of Sister Chromatids; The role of GTSE1 in G2/M progression after G2 checkpoint; Resolution of Sister Chromatid Cohesion; RHO GTPases Activate Formins; EML4 and NUDC in mitotic spindle formation; Assembly and cell surface presentation of NMDA receptors;…	35	0	0.494	0.110974	0.542466	49.47	72.5	127.5	47.69	39	High	Peak Found	Peak Found	High	Peak Found	Peak Found	1
FALSE	High	Master Protein	P01860	Immunoglobulin heavy constant gamma 3 [OS=Homo sapiens]	0	80.846	40	12	299	4	377	41.3	7.9	757.77	12											0	1	1.547	0.0599648	0.37764	100.09	126	74	41.42	57.28	High	High	High	High	High	High	1
FALSE	High	Master Protein	P68366	Tubulin alpha-4A chain [OS=Homo sapiens]	0	187.684	69	25	298	7	448	49.9	5.06	828.55	25	cell cycle OR cell proliferation;cell organization and biogenesis	non-structural extracellular;cytosol;cytoskeleton;other cell component	cytoskeletal activity;other molecular function	Pf00091, Pf03953	7277	ENSG00000127824	TUBA4A	A8MUB1; B3KNQ6; hsa:7277; P05215; P68366	Alzheimer's disease and miRNA effects; Pathogenic Escherichia coli infection; Parkin-ubiquitin proteasomal system pathway; Alzheimer's disease; HDAC6 interactions in the central nervous system	PKR-mediated signaling; Separation of Sister Chromatids; The role of GTSE1 in G2/M progression after G2 checkpoint; Platelet degranulation ; Recycling pathway of L1; MHC class II antigen presentation; HSP90 chaperone cycle for steroid hormone receptors (SHR) in the presence of ligand; Intraflagellar transport; COPI-dependent Golgi-to-ER retrograde traffic; Translocation of SLC2A4 (GLUT4) to the p…	43	1	1.152	0.373837	0.852615	69.54	120.6	79.4	43.92	37.43	High	High	High	High	High	High	1
FALSE	High	Master Protein	P30049	ATP synthase subunit delta, mitochondrial [OS=Homo sapiens]	0	38.428	41	4	294	4	168	17.5	5.49	696.39	4	cell organization and biogenesis;other metabolic processes;transport;other biological processes	other membranes;mitochondrion	transporter activity	Pf02823, Pf21335	513	ENSG00000099624	ATP5F1D	D6W5Y3; hsa:513; P30049; Q6FG90	Electron transport chain: OXPHOS system in mitochondria; 7q11.23 copy number variation syndrome; Oxidative phosphorylation	Cristae formation; Formation of ATP by chemiosmotic coupling	5	0	0.94	0.815032	0.974933	54.81	107.9	92.1	46.81	33.36	High	High	High	High	High	High	1
FALSE	High	Master Protein	P02679	Fibrinogen gamma chain [OS=Homo sapiens]	0	192.241	75	24	293	24	453	51.5	5.62	862.7	24	cell adhesion;cell organization and biogenesis;protein metabolism;other metabolic processes;stress response;transport;other biological processes	non-structural extracellular;plasma membrane;other membranes;ER/Golgi;other cell component	signal transduction activity or receptor binding;other molecular function	Pf00147, Pf08702	2266	ENSG00000171557	FGG	A8K057; hsa:2266; P02679; P04469; P04470; Q53Y18; Q96A14; Q96KJ3; Q9UC62; Q9UC63; Q9UCF3	Selenium micronutrient network; Folate metabolism; Blood clotting cascade; Complement system; VEGFA-VEGFR2 signaling; Fibrin complement receptor 3 signaling pathway; COVID-19, thrombosis and anticoagulation; Network map of SARS-CoV-2 signaling pathway	Platelet degranulation ; Regulation of Insulin-like Growth Factor (IGF) transport and uptake by Insulin-like Growth Factor Binding Proteins (IGFBPs); Post-translational protein phosphorylation; ER-Phagosome pathway; Integrin cell surface interactions; Signaling by BRAF and RAF1 fusions; MyD88:MAL(TIRAP) cascade initiated on plasma membrane; MyD88 deficiency (TLR2/4); IRAK4 deficiency (TLR2/4); Re…	28	0	0.947	0.796577	0.972357	75.07	111.3	88.7	52.36	76.53	High	High	High	High	High	High	1
FALSE	High	Master Protein	P08559	Pyruvate dehydrogenase E1 component subunit alpha, somatic form, mitochondrial [OS=Homo sapiens]	0	161.374	57	29	291	25	390	43.3	8.06	735.51	29	other metabolic processes	mitochondrion;nucleus;other cell component	other molecular function	Pf00676	5160	ENSG00000131828	PDHA1	A5YVE9; B2R5P7; B7Z3T7; B7Z3X5; hsa:5160; P08559; Q53H41; Q5JPT8; Q9NP12; Q9UBJ8; Q9UBU0; Q9UNG4; Q9UNG5	TCA cycle and deficiency of pyruvate dehydrogenase complex (PDHc); Amino acid metabolism; Lipid metabolism pathway; PI3K/AKT/mTOR - vitamin D3 signaling; Hereditary leiomyomatosis and renal cell carcinoma pathway; Metabolic reprogramming in colon cancer; Thiamine metabolic pathways; TCA cycle in senescence; Neuroinflammation and glutamatergic signaling; Acetylcholine synthesis; Glycolysis and glu…	Glyoxylate metabolism and glycine degradation; Regulation of pyruvate dehydrogenase (PDH) complex; Signaling by Retinoic Acid; Mitochondrial protein degradation	17	5	0.898	0.94331	0.996797	82.91	93.8	106.2	69.74	18.98	High	High	High	High	High	High	1
FALSE	High	Master Protein	P21980	Protein-glutamine gamma-glutamyltransferase 2 [OS=Homo sapiens]	0	193.045	55	27	291	27	687	77.3	5.22	832.35	27	cell-cell signaling;cell organization and biogenesis;protein metabolism;other metabolic processes;transport;developmental processes;signal transduction;other biological processes	extracellular matrix;plasma membrane;other membranes;cytosol;mitochondrion;ER/Golgi;nucleus;other cell component	other molecular function	Pf00868, Pf00927, Pf01841	7052	ENSG00000198959	TGM2	E1P5V9; hsa:7052; P21980; Q16436; Q6B838; Q9BTN7; Q9H035; Q9UH35	IL-18 signaling pathway		1	0	0.738	0.537269	0.918359	72.25	96.9	103.1	52.76	34.77	High	High	High	High	High	High	1
FALSE	High	Master Protein	P50461	Cysteine and glycine-rich protein 3 [OS=Homo sapiens]	0	127.209	64	13	290	12	194	21	8.54	865.97	13	cell organization and biogenesis;stress response;developmental processes;signal transduction;other biological processes	cytosol;cytoskeleton;nucleus;other cell component	cytoskeletal activity;other molecular function	Pf00412	8048	ENSG00000129170	CSRP3	hsa:8048; P50461; Q9P131; S4S7M7	Cardiomyocyte signaling pathways converging on titin		1	1	0.953	0.777614	0.97229	50.52	102.9	97.1	7.16	21.82	High	High	High	High	High	High	1
FALSE	High	Master Protein	P02675	Fibrinogen beta chain [OS=Homo sapiens]	0	213.067	68	26	290	26	491	55.9	8.27	881.08	26	cell adhesion;cell organization and biogenesis;protein metabolism;other metabolic processes;stress response;other biological processes	non-structural extracellular;plasma membrane;other membranes;ER/Golgi;other cell component	signal transduction activity or receptor binding;other molecular function	Pf00147, Pf08702	2244	ENSG00000171564	FGB	A0JLR9; B2R7G3; hsa:2244; P02675; Q32Q65; Q3KPF2	Selenium micronutrient network; Folate metabolism; Blood clotting cascade; Complement system; VEGFA-VEGFR2 signaling; Dengue-2 interactions with complement and coagulation cascades; Fibrin complement receptor 3 signaling pathway; COVID-19, thrombosis and anticoagulation; Network map of SARS-CoV-2 signaling pathway; Complement and coagulation cascades	Common Pathway of Fibrin Clot Formation; ER-Phagosome pathway; Integrin cell surface interactions; Platelet degranulation ; Signaling by BRAF and RAF1 fusions; MyD88:MAL(TIRAP) cascade initiated on plasma membrane; MyD88 deficiency (TLR2/4); IRAK4 deficiency (TLR2/4); Regulation of TLR by endogenous ligand; Signaling by moderate kinase activity BRAF mutants; Paradoxical activation of RAF signalin…	28	0	1.028	0.583447	0.929111	86.59	121.2	78.8	44.94	76.77	High	High	High	High	High	High	1
FALSE	High	Master Protein	E9PAV3	Nascent polypeptide-associated complex subunit alpha, muscle-specific form [OS=Homo sapiens]	0	257.822	34	45	287	44	2078	205.3	9.58	796.73	45	other biological processes	translational apparatus;nucleus;other cell component	nucleic acid binding activity;other molecular function	Pf01849, Pf19026		ENSG00000196531	NACA	E9PAV3			0	1	0.807	0.763666	0.970903	70.02	90.8	109.2	23.78	54.9	High	High	High	High	High	High	1
FALSE	High	Master Protein	P99999	Cytochrome c [OS=Homo sapiens]	0	84.722	56	8	285	8	105	11.7	9.57	632.52	8	other metabolic processes;signal transduction;other biological processes	other membranes;cytosol;mitochondrion;nucleus	other molecular function	Pf00034	54205	ENSG00000172115	CYCS	A4D166; B2R4I1; hsa:54205; P00001; P99999; Q6NUR2; Q6NX69; Q96BV4	miRNA regulation of DNA damage response; Apoptosis modulation and signaling; Alzheimer's disease and miRNA effects; AGE/RAGE pathway; Parkinson's disease pathway; Nanomaterial induced apoptosis; Apoptosis; Fas ligand pathway and stress induction of heat shock proteins; Apoptosis modulation by HSP70; VEGFA-VEGFR2 signaling; Oxidative damage response; NO/cGMP/PKG mediated neuroprotection; Chromosom…	Respiratory electron transport; Detoxification of Reactive Oxygen Species; Transcriptional activation of mitochondrial biogenesis; TP53 Regulates Metabolic Genes; Cytoprotection by HMOX1; Activation of caspases through apoptosome-mediated cleavage; SMAC (DIABLO) binds to IAPs ; SMAC(DIABLO)-mediated dissociation of IAP:caspase complexes ; Regulation of the apoptosome activity; Release of apoptoti…	36	0	0.792	0.712935	0.960029	75.37	105.3	94.7	58.37	48.11	High	High	High	High	High	High	1
FALSE	High	Master Protein	Q9BQE3	Tubulin alpha-1C chain [OS=Homo sapiens]	0	169.213	65	24	285	1	449	49.9	5.1	749.58	24	cell cycle OR cell proliferation;cell organization and biogenesis;transport;other biological processes	cytoskeleton;nucleus;other cell component	cytoskeletal activity;other molecular function	Pf00091, Pf03953	84790	ENSG00000167553	TUBA1C	hsa:84790; Q9BQE3	Alzheimer's disease and miRNA effects; Pathogenic Escherichia coli infection; Parkin-ubiquitin proteasomal system pathway; VEGFA-VEGFR2 signaling; Alzheimer's disease; HDAC6 interactions in the central nervous system	Separation of Sister Chromatids; MHC class II antigen presentation; Resolution of Sister Chromatid Cohesion; HSP90 chaperone cycle for steroid hormone receptors (SHR) in the presence of ligand; RHO GTPases Activate Formins; COPI-mediated anterograde transport; COPI-independent Golgi-to-ER retrograde traffic; HCMV Early Events; Aggrephagy; EML4 and NUDC in mitotic spindle formation; Recruitment of…	37	0	1.959	0.0453019	0.322418	17.87	132.4	67.6		16.93	Not Found	Not Found	High	Not Found	High	High	1
FALSE	High	Master Protein	O95817	BAG family molecular chaperone regulator 3 [OS=Homo sapiens]	0	209.066	72	26	282	26	575	61.6	6.95	752.42	26	cell organization and biogenesis;protein metabolism;other metabolic processes;stress response;transport;signal transduction;other biological processes	other membranes;cytosol;cytoskeleton;nucleus;other cell component	other molecular function	Pf00397, Pf02179	9531	ENSG00000151929	BAG3	A8K5L8; hsa:9531; O95817; Q3B763; Q9NT20; Q9P120	Cell interactions of the pancreatic cancer microenvironment	Regulation of HSF1-mediated heat shock response	2	0	0.733	0.523357	0.91215	60.6	105.4	94.6	23.25	62.97	High	High	High	High	High	High	1
FALSE	High	Master Protein	Q9UBY9	Heat shock protein beta-7 [OS=Homo sapiens]	0	149.156	86	11	279	11	170	18.6	6.52	785.18	11	stress response;developmental processes;other biological processes	cytoskeleton;nucleus;other cell component	cytoskeletal activity	Pf00011	27129	ENSG00000173641	HSPB7	B3KQ37; C9K0Y0; hsa:27129; Q9NU17; Q9UBY9	Differentiation of white and brown adipocyte		1	0	0.78	0.673676	0.951634	83.95	85	115	66.42	67.21	High	High	High	High	High	High	1
FALSE	High	Master Protein	P06396	Gelsolin [OS=Homo sapiens]	0	210.301	50	28	277	28	782	85.6	6.28	854.58	28	cell organization and biogenesis;protein metabolism;other metabolic processes;stress response;transport;developmental processes;other biological processes	non-structural extracellular;plasma membrane;other membranes;cytosol;cytoskeleton;other cell component	cytoskeletal activity;other molecular function	Pf00626	2934	ENSG00000148180	GSN	A2A418; A8MUD1; A8MYN7; B7Z373; B7Z5V1; F5H1A8; hsa:2934; P06396; Q5T0I2; Q8WVV7	Ebola virus infection in host; Regulation of actin cytoskeleton	Neutrophil degranulation; Amyloid fiber formation; Sensory processing of sound by outer hair cells of the cochlea; Caspase-mediated cleavage of cytoskeletal proteins	6	0	0.905	0.920106	0.994751	61.62	102.6	97.4	21.32	35.29	High	High	High	High	High	High	1
FALSE	High	Master Protein	P60660	Myosin light polypeptide 6 [OS=Homo sapiens]	0	91.495	74	9	276	6	151	16.9	4.65	681.92	9	other biological processes	cytosol;cytoskeleton;other cell component	cytoskeletal activity;other molecular function		4637	ENSG00000092841	MYL6	hsa:4637; P16475; P24572; P24573; P60660; Q12790; Q561V9; Q6IAZ0; Q6IPY5	Ciliary landscape	RHO GTPases activate CIT; EPHA-mediated growth cone collapse; Sema4D induced cell migration and growth-cone collapse; Smooth Muscle Contraction; RHO GTPases activate PKNs; RHO GTPases Activate ROCKs; RHO GTPases activate PAKs	8	3	0.773	0.64876	0.94247	99.4	73	127	52.89	50.87	High	High	High	High	High	High	1
FALSE	High	Master Protein	Q96I99	Succinate--CoA ligase [GDP-forming] subunit beta, mitochondrial [OS=Homo sapiens]	0	129.986	56	20	275	20	432	46.5	6.39	749.65	20	other metabolic processes	plasma membrane;other membranes;mitochondrion;other cell component	other molecular function	Pf00549, Pf08442	8801	ENSG00000172340	SUCLG2	C9JVT2; hsa:8801; O95195; Q6NUH7; Q86VX8; Q8WUQ1; Q96I99	TCA cycle and deficiency of pyruvate dehydrogenase complex (PDHc); Metabolic reprogramming in colon cancer; TCA cycle (aka Krebs or citric acid cycle)	Mitochondrial protein degradation; Citric acid cycle (TCA cycle)	5	0	0.948	0.792257	0.97229	59.39	107.3	92.7	56.58	3.32	High	High	High	High	High	High	1
FALSE	High	Master Protein	P54652	Heat shock-related 70 kDa protein 2 [OS=Homo sapiens]	0	133.665	40	23	275	16	639	70	5.74	791.06	23	cell cycle OR cell proliferation;cell organization and biogenesis;protein metabolism;other metabolic processes;stress response;other biological processes	plasma membrane;other membranes;cytosol;cytoskeleton;nucleus;other cell component	cytoskeletal activity;other molecular function	Pf00012	3306	ENSG00000126803	HSPA2	hsa:3306; P54652; Q15508; Q53XM3; Q9UE78	Parkin-ubiquitin proteasomal system pathway; MAPK signaling pathway; Measles virus infection; 7q11.23 copy number variation syndrome; Urotensin-II-mediated signaling pathway	Regulation of HSF1-mediated heat shock response; HSP90 chaperone cycle for steroid hormone receptors (SHR) in the presence of ligand; Meiotic synapsis; PKR-mediated signaling; Attenuation phase	10	0	1.345	0.142963	0.617144	90.72	136.5	63.5	59.54	57.75	High	High	High	High	High	High	1
TRUE	High	Master Protein	P08238	Heat shock protein HSP 90-beta [OS=Homo sapiens]	0	197.243	50	31	273	16	724	83.2	5.03	731.79	31	cell organization and biogenesis;protein metabolism;DNA metabolism;other metabolic processes;stress response;other biological processes	non-structural extracellular;plasma membrane;other membranes;cytosol;nucleus;other cell component	enzyme regulator activity;cytoskeletal activity;nucleic acid binding activity;other molecular function	Pf00183, Pf13589	3326	ENSG00000096384	HSP90AB1	B2R5P0; hsa:3326; P08238; Q5T9W7; Q9NQW0; Q9NTK6	Nuclear receptors meta-pathway; NRF2 pathway; Focal adhesion: PI3K-Akt-mTOR-signaling pathway; PI3K-Akt signaling pathway	Regulation of actin dynamics for phagocytic cup formation; Potential therapeutics for SARS; Neutrophil degranulation; The role of GTSE1 in G2/M progression after G2 checkpoint; HSP90 chaperone cycle for steroid hormone receptors (SHR) in the presence of ligand; SARS-CoV-2 activates/modulates innate and adaptive immune responses; Aryl hydrocarbon receptor signalling; Estrogen-dependent gene expres…	25	0	0.415	0.00840352	0.105846	68.92	51.2	148.8	69.17	35.38	High	High	High	High	High	High	1
FALSE	High	Master Protein	Q86UP2	Kinectin [OS=Homo sapiens]	0	238.754	44	54	270	54	1357	156.2	5.64	695.46	54	transport;other biological processes	plasma membrane;other membranes;ER/Golgi	cytoskeletal activity	Pf05104	3895	ENSG00000126777	KTN1	B4DZ88; hsa:3895; Q13999; Q14707; Q15387; Q17RZ5; Q5GGW3; Q86UP2; Q86W57	Glucocorticoid receptor pathway; Nuclear receptors meta-pathway	CDC42 GTPase cycle; RAC1 GTPase cycle; Regulation of Insulin-like Growth Factor (IGF) transport and uptake by Insulin-like Growth Factor Binding Proteins (IGFBPs); Post-translational protein phosphorylation; RND2 GTPase cycle; RHOA GTPase cycle; RHOG GTPase cycle; RND3 GTPase cycle; RHO GTPases activate KTN1	11	0	0.914	0.89319	0.993615	67.25	78.1	121.9	35.59	60.28	High	High	High	High	High	High	1
FALSE	High	Master Protein	P08294	Extracellular superoxide dismutase [Cu-Zn] [OS=Homo sapiens]	0	172.47	61	14	264	14	240	25.8	6.61	781.22	14	other metabolic processes;stress response;other biological processes	extracellular matrix;ER/Golgi	other molecular function	Pf00080	6649	ENSG00000109610	SOD3	P08294; Q5U781; Q6FHA2	Selenium micronutrient network; Vitamin B12 metabolism; Folate metabolism; Trans-sulfuration, one-carbon metabolism and related pathways; Nuclear receptors meta-pathway; NRF2 pathway; Copper homeostasis; One-carbon metabolism and related pathways; Oxidative stress response; Male infertility	Detoxification of Reactive Oxygen Species; NFE2L2 regulating anti-oxidant/detoxification enzymes	12	0	0.791	0.710914	0.960029	96.26	81.8	118.2	91.48	64.1	High	High	High	High	High	High	1
FALSE	High	Master Protein	Q9HBL0	Tensin-1 [OS=Homo sapiens]	0	274.243	53	51	264	49	1735	185.6	7.75	714.64	51											0	2	1.115	0.404419	0.874983	70.06	120.2	79.8	19.47	51.49	High	High	High	High	High	High	1
FALSE	High	Master Protein	P31040	Succinate dehydrogenase [ubiquinone] flavoprotein subunit, mitochondrial [OS=Homo sapiens]	0	188.26	56	27	264	27	664	72.6	7.39	686.66	27	other metabolic processes;developmental processes	other membranes;mitochondrion;nucleus	other molecular function	Pf00890, Pf02910	6389	ENSG00000073578	SDHA	A8K5J6; B4DJ60; E9PBJ5; hsa:6389; P31040; Q16395; Q59GW8; Q8IW48; Q9UMY5	Electron transport chain: OXPHOS system in mitochondria; TCA cycle and deficiency of pyruvate dehydrogenase complex (PDHc); Amino acid metabolism; Nonalcoholic fatty liver disease; Mitochondrial complex II assembly; Arsenic metabolism and reactive oxygen species generation; TCA cycle (aka Krebs or citric acid cycle)	Respiratory electron transport; Citric acid cycle (TCA cycle)	9	0	0.657	0.306254	0.798352	62.07	83	117	38.59	20.78	High	High	High	High	High	High	1
FALSE	High	Master Protein	P61604	10 kDa heat shock protein, mitochondrial [OS=Homo sapiens]	0	44.711	69	9	263	9	102	10.9	8.92	351.08	9	protein metabolism;other metabolic processes;stress response;other biological processes	mitochondrion	other molecular function	Pf00166	3336	ENSG00000115541	HSPE1	hsa:3336; O95421; P61604; Q04984; Q53X54; Q9UDH0		RHOG GTPase cycle	1	0	0.712	0.456893	0.898224	73.24	89.4	110.6	48.39	46.66	High	High	High	High	High	High	1
FALSE	High	Master Protein	Q15075	Early endosome antigen 1 [OS=Homo sapiens]	0	259.141	46	51	261	51	1411	162.4	5.68	716.17	51	cell-cell signaling;cell organization and biogenesis;transport;signal transduction;other biological processes	other membranes;cytosol;other cytoplasmic organelle;other cell component	other molecular function	Pf01363	8411	ENSG00000102189	EEA1	hsa:8411; Q14221; Q15075	VEGFA-VEGFR2 signaling	Toll Like Receptor 9 (TLR9) Cascade	2	0	1.148	0.350047	0.835618	48.2	114.1	85.9	24.28	32.64	High	High	High	High	High	High	1
TRUE	High	Master Protein	P00734	Prothrombin [OS=Homo sapiens]	0	211.891	59	32	260	32	622	70	5.9	724.37	32	protein metabolism;stress response;signal transduction;other biological processes	non-structural extracellular;extracellular matrix;plasma membrane;other membranes;ER/Golgi	signal transduction activity or receptor binding;other molecular function	Pf00051, Pf00089, Pf00594, Pf09396	2147	ENSG00000180210	F2	B2R7F7; B4E1A7; hsa:2147; P00734; Q4QZ40; Q53H04; Q53H06; Q69EZ7; Q7Z7P3; Q9UCA1	Selenium micronutrient network; Vitamin B12 metabolism; Folate metabolism; Blood clotting cascade; IL1 and megakaryocytes in obesity; Dengue-2 interactions with complement and coagulation cascades; Regulation of actin cytoskeleton; Vitamin K metabolism and activation of dependent proteins; Complement and coagulation cascades	Cell surface interactions at the vascular wall; Regulation of Complement cascade; G alpha (q) signalling events; Peptide ligand-binding receptors; Thrombin signalling through proteinase activated receptors (PARs); Regulation of Insulin-like Growth Factor (IGF) transport and uptake by Insulin-like Growth Factor Binding Proteins (IGFBPs); Intrinsic Pathway of Fibrin Clot Formation; Common Pathway o…	23	0	0.437	0.0141964	0.150577	92.92	42.5	157.5	41.76	64.93	High	High	High	High	High	High	1
FALSE	High	Master Protein	O95359	Transforming acidic coiled-coil-containing protein 2 [OS=Homo sapiens]	0	331.524	39	63	258	61	2948	309.2	4.79	710.1	63	cell cycle OR cell proliferation;cell organization and biogenesis;developmental processes	plasma membrane;other membranes;cytosol;cytoskeleton;nucleus;other cell component	other molecular function	Pf05010	10579	ENSG00000138162	TACC2	hsa:10579; O95359; Q4VXL0; Q4VXL3; Q4VXL6; Q4VXL7; Q5U5T7; Q86WG6; Q86WG7; Q8TCK9; Q9BVQ1; Q9NZ41; Q9NZR5			0	2	0.758	0.60099	0.93383	62.48	89.4	110.6	50.62	29	High	High	High	High	High	High	1
TRUE	High	Master Protein	P01011	Alpha-1-antichymotrypsin [OS=Homo sapiens]	0	193.349	51	21	258	21	423	47.6	5.52	767.04	21	stress response;other biological processes	non-structural extracellular;nucleus;other cytoplasmic organelle;other cell component	enzyme regulator activity;nucleic acid binding activity	Pf00079	12	ENSG00000196136	SERPINA3	B3KVQ7; hsa:12; P01011; Q13703; Q2TU87; Q2TU88; Q59GP9; Q6LBY8; Q6LDT7; Q6NSC9; Q8N177; Q96DW8; Q9UC47; Q9UNU9	Selenium micronutrient network; Vitamin B12 metabolism; Folate metabolism	Neutrophil degranulation; Platelet degranulation	5	0	0.488	0.0384354	0.290532	92.59	79	121	69.4	89.04	High	High	High	High	High	High	1
TRUE	High	Master Protein	P08133	Annexin A6 [OS=Homo sapiens]	0	176.47	60	37	258	37	673	75.8	5.6	643.68	37	cell organization and biogenesis;stress response;transport;developmental processes;signal transduction;other biological processes	plasma membrane;other membranes;mitochondrion;other cytoplasmic organelle;other cell component	transporter activity;cytoskeletal activity;other molecular function	Pf00191	309	ENSG00000197043	ANXA6	B7Z8A7; D3DQH4; E9PGK1; hsa:309; P08133; Q6ZT79	Calcium regulation in cardiac cells; Prostaglandin synthesis and regulation	Smooth Muscle Contraction	3	0	0.457	0.0216769	0.205958	65.85	71.5	128.5	10.91	46.64	High	High	High	High	High	High	1
FALSE	High	Master Protein	P46821	Microtubule-associated protein 1B [OS=Homo sapiens]	0	289.811	33	50	257	48	2468	270.5	4.81	728.13	50	cell organization and biogenesis;stress response;transport;developmental processes;other biological processes	plasma membrane;other membranes;cytosol;cytoskeleton;other cell component	cytoskeletal activity;other molecular function	Pf00414	4131	ENSG00000131711	MAP1B	A2BDK5; hsa:4131; P46821	Microtubule cytoskeleton regulation; Fragile X syndrome; Neurogenesis regulation in the olfactory epithelium; HDAC6 interactions in the central nervous system	RSV-host interactions	5	2	0.786	0.693323	0.954938	60.19	86.7	113.3	42.73	14.64	High	High	High	High	High	High	1
FALSE	High	Master Protein	Q01469	Fatty acid-binding protein 5 [OS=Homo sapiens]	0	131.701	61	12	255	12	135	15.2	7.01	727.73	12	other metabolic processes;transport;other biological processes	non-structural extracellular;plasma membrane;other membranes;cytosol;nucleus;other cytoplasmic organelle;other cell component	transporter activity;other molecular function	Pf00061	2171	ENSG00000164687	FABP5	B2R4K0; hsa:2171; Q01469	PPAR signaling pathway; Fatty acid transporters	Neutrophil degranulation; Triglyceride catabolism; Signaling by Retinoic Acid	5	0	0.897	0.945484	0.996797	83.88	106.8	93.2	43.8	66.42	High	High	High	High	High	High	1
FALSE	High	Master Protein	P0DPH7	Tubulin alpha-3C chain [OS=Homo sapiens]	0	168.931	63	22	253	0	450	49.9	5.1	714.33	22	cell cycle OR cell proliferation;cell organization and biogenesis;other biological processes	cytoskeleton;other cell component	cytoskeletal activity;other molecular function	Pf00091, Pf03953	7278	ENSG00000198033	TUBA3C	A6NJQ0; hsa:7278; P0DPH7; Q13748; Q5W099; Q6PEY3; Q96F18	Alzheimer's disease and miRNA effects; Pathogenic Escherichia coli infection; Parkin-ubiquitin proteasomal system pathway; Alzheimer's disease; HDAC6 interactions in the central nervous system	Translocation of SLC2A4 (GLUT4) to the plasma membrane; Intraflagellar transport; Recycling pathway of L1; COPI-dependent Golgi-to-ER retrograde traffic; Separation of Sister Chromatids; The role of GTSE1 in G2/M progression after G2 checkpoint; Microtubule-dependent trafficking of connexons from Golgi to the plasma membrane; Gap junction assembly; MHC class II antigen presentation; Resolution of…	36	2	1.055	0.629629	0.939954	78.47	81.8	118.2	19.4	45.47	Not Found	Not Found	Not Found	Not Found	Not Found	Not Found	1
FALSE	High	Master Protein	P30043	Flavin reductase (NADPH) [OS=Homo sapiens]	0	138.704	73	12	253	12	206	22.1	7.65	807.93	12	other metabolic processes	plasma membrane;other membranes;cytosol;nucleus;other cell component	other molecular function	Pf13460	645	ENSG00000090013	BLVRB	A6NKD8; B2R5C6; hsa:645; P30043; P32078; P53005; Q32LZ2	Nuclear receptors meta-pathway; NRF2 pathway; IL-10 anti-inflammatory signaling pathway	Cytoprotection by HMOX1; Heme degradation	5	0	1.702	0.0205664	0.197365	102.19	117.5	82.5	101.5	85.85	High	High	High	High	High	High	1
FALSE	High	Master Protein	P48735	Isocitrate dehydrogenase [NADP], mitochondrial [OS=Homo sapiens]	0	144.004	54	25	252	24	452	50.9	8.69	667.51	25	other metabolic processes	cytosol;mitochondrion;other cytoplasmic organelle	other molecular function	Pf00180	3418	ENSG00000182054	IDH2	B2R6L6; B4DFL2; hsa:3418; P48735; Q96GT3	VEGFA-VEGFR2 signaling; Metabolic reprogramming in colon cancer; Cerebral organic acidurias, including diseases; TCA cycle (aka Krebs or citric acid cycle)	Mitochondrial protein degradation; Transcriptional activation of mitochondrial biogenesis; Citric acid cycle (TCA cycle)	7	1	0.569	0.126681	0.587243	61.15	76.5	123.5	46.49	45.01	High	High	High	High	High	High	1
FALSE	High	Master Protein	P30048	Thioredoxin-dependent peroxide reductase, mitochondrial [OS=Homo sapiens]	0	90.781	52	10	251	10	256	27.7	7.78	747.42	10	cell organization and biogenesis;protein metabolism;other metabolic processes;stress response;other biological processes	plasma membrane;other membranes;cytosol;mitochondrion;nucleus;other cytoplasmic organelle;other cell component	enzyme regulator activity;other molecular function	Pf00578, Pf10417	10935	ENSG00000165672	PRDX3	B2R7Z0; D3DRC9; E9PH29; hsa:10935; P30048; P35690; Q0D2H1; Q13776; Q5T5V2; Q96HK4	Selenium micronutrient network	Detoxification of Reactive Oxygen Species	2	0	1.233	0.235619	0.726398	83.75	113	87	33.56	73.06	High	High	High	High	High	High	1
FALSE	High	Master Protein	P18669	Phosphoglycerate mutase 1 [OS=Homo sapiens]	0	165.872	77	17	250	13	254	28.8	7.18	680.86	17	other metabolic processes;other biological processes	non-structural extracellular;cytosol;other cell component	other molecular function	Pf00300	5223	ENSG00000171314	PGAM1	hsa:5223; P18669; Q9BWC0	Cori cycle; Metabolic reprogramming in colon cancer; Warburg effect modulated by deubiquitinating enzymes and their substrates; Glycolysis and gluconeogenesis; Metabolic Epileptic Disorders	Neutrophil degranulation; Glycolysis; Gluconeogenesis	8	0	0.75	0.576207	0.929111	72.24	103.1	96.9	20.12	42.14	High	High	High	High	High	High	1
FALSE	High	Master Protein	Q9Y281	Cofilin-2 [OS=Homo sapiens]	0	104.258	76	16	250	11	166	18.7	7.88	679.03	16	cell organization and biogenesis;other biological processes	cytoskeleton;nucleus;other cell component	cytoskeletal activity	Pf00241	1073	ENSG00000165410	CFL2	G3V5P4; hsa:1073; Q9Y281	Leptin signaling pathway; Microtubule cytoskeleton regulation; Regulation of actin cytoskeleton; G13 signaling pathway		4	0	1.043	0.549822	0.921858	78.42	119	81	38.68	73.8	High	High	High	High	High	High	1
FALSE	High	Master Protein	Q96HC4	PDZ and LIM domain protein 5 [OS=Homo sapiens]	0	138.868	38	17	250	17	596	63.9	8.21	633.57	17	cell organization and biogenesis;developmental processes;other biological processes	other membranes;cytosol;cytoskeleton;other cell component	cytoskeletal activity;other molecular function	Pf00412, Pf00595	10611	ENSG00000163110	PDLIM5	A8K6F9; D6RB78; E9PBF5; hsa:10611; O60705; Q56VN4; Q5UW38; Q8WVK0; Q96HC4	Extracellular vesicles in the crosstalk of cardiac cells	Neurexins and neuroligins	2	0	1.061	0.511087	0.905576	65.69	103.6	96.4	16.28	37.39	High	High	High	High	High	High	1
FALSE	High	Master Protein	O75369	Filamin-B [OS=Homo sapiens]	0	237.03	28	56	250	43	2602	278	5.73	625.17	56	cell organization and biogenesis;stress response;signal transduction;other biological processes	plasma membrane;other membranes;cytosol;cytoskeleton;other cell component	cytoskeletal activity;other molecular function	Pf00307, Pf00630	2317	ENSG00000136068	FLNB	B2ZZ83; B2ZZ84; B2ZZ85; C9JKE6; C9JMC4; hsa:2317; O75369; Q13706; Q59EC2; Q60FE7; Q6MZJ1; Q8WXS9; Q8WXT0; Q8WXT1; Q8WXT2; Q8WXT3; Q9NRB5; Q9NT26; Q9UEV9	Focal adhesion; MAPK signaling pathway; VEGFA-VEGFR2 signaling; Ebola virus infection in host; NPHP1 deletion syndrome	ISG15 antiviral mechanism	6	0	1.157	0.351643	0.836447	55.04	103.3	96.7	23.59	29.87	High	High	High	High	High	High	1
FALSE	High	Master Protein	O43707	Alpha-actinin-4 [OS=Homo sapiens]	0	217.836	51	36	250	17	911	104.8	5.44	626.61	36	cell organization and biogenesis;transport;signal transduction;other biological processes	non-structural extracellular;plasma membrane;other membranes;cytoskeleton;nucleus;other cell component	signal transduction activity or receptor binding;cytoskeletal activity;nucleic acid binding activity;other molecular function	Pf00307, Pf00435, Pf08726	81	ENSG00000130402; ENSG00000282844	ACTN4	A4K467; D6PXK4; hsa:81; O43707; O76048	Arrhythmogenic right ventricular cardiomyopathy; Primary focal segmental glomerulosclerosis (FSGS); Focal adhesion; Striated muscle contraction pathway; Ebola virus infection in host; Nephrotic syndrome; Alstrom syndrome	Platelet degranulation ; Nephrin family interactions	9	1	0.538	0.132834	0.599812	82.51	51	149	55.68	46.02	High	High	High	High	High	High	1
FALSE	High	Master Protein	Q9H987	Synaptopodin 2-like protein [OS=Homo sapiens]	0	197.544	43	24	247	24	977	102.4	9.74	769.94	24	cell organization and biogenesis;developmental processes;other biological processes	cytoskeleton;nucleus	cytoskeletal activity	Pf00595	79933	ENSG00000166317	SYNPO2L	A5PKV9; hsa:79933; Q68A20; Q9H987			0	0	1.251	0.215998	0.700895	87.52	117.7	82.3	44.04	70.77	High	High	High	High	High	High	1
FALSE	High	Master Protein	P02452	Collagen alpha-1(I) chain [OS=Homo sapiens]	0	139.152	24	24	245	24	1464	138.8	5.8	643.43	24	cell organization and biogenesis;other metabolic processes;stress response;transport;developmental processes;signal transduction;other biological processes	non-structural extracellular;extracellular matrix;ER/Golgi;other cell component	other molecular function	Pf00093, Pf01391, Pf01410	1277	ENSG00000108821	COL1A1	hsa:1277; O76045; P02452; P78441; Q13896; Q13902; Q13903; Q14037; Q14992; Q15176; Q15201; Q16050; Q59F64; Q7KZ30; Q7KZ34; Q8IVI5; Q8N473; Q9UML6; Q9UMM7	Focal adhesion; Osteoblast signaling; Focal adhesion: PI3K-Akt-mTOR-signaling pathway; miR-509-3p alteration of YAP1/ECM axis; PI3K-Akt signaling pathway; Inflammatory response pathway; Netrin-UNC5B signaling pathway; IL-18 signaling pathway; Type I collagen synthesis in the context of osteogenesis imperfecta; Angiotensin II receptor type 1 pathway; Burn wound healing; CCL18 signaling pathway; NR…	Cell surface interactions at the vascular wall; Platelet Aggregation (Plug Formation); Immunoregulatory interactions between a Lymphoid and a non-Lymphoid cell; Collagen degradation; Integrin cell surface interactions; ECM proteoglycans; Collagen chain trimerization; GPVI-mediated activation cascade; Syndecan interactions; MET activates PTK2 signaling; RUNX2 regulates osteoblast differentiation; …	41	0	0.834	0.853346	0.985251	53.71	90.4	109.6	36.27	6.33	High	High	High	High	High	High	1
FALSE	High	Master Protein	O60237	Protein phosphatase 1 regulatory subunit 12B [OS=Homo sapiens]	0	218.321	44	38	245	36	982	110.3	5.67	676.43	38	signal transduction;other biological processes	cytosol;cytoskeleton;nucleus;other cell component	enzyme regulator activity;other molecular function	Pf00023, Pf15898	4660	ENSG00000077157	PPP1R12B	A0A0A0MS24; A8MYF5; B7ZMN6; hsa:4660; O60237; Q2TAI8; Q5T506; Q5VUK2; Q8N179; Q9HCB7; Q9HCB8	Focal adhesion	RHO GTPases activate CIT; RHO GTPases activate PKNs; RHO GTPases Activate ROCKs; RHO GTPases activate PAKs	5	2	0.763	0.618659	0.937983	62.11	87.1	112.9	17.37	27.82	High	High	High	High	High	High	1
FALSE	High	Master Protein	P07355	Annexin A2 [OS=Homo sapiens]	0	148.134	63	21	242	21	339	38.6	7.75	657.78	21	cell organization and biogenesis;RNA metabolism OR transcription;other metabolic processes;transport;developmental processes;other biological processes	non-structural extracellular;extracellular matrix;plasma membrane;other membranes;cytosol;nucleus;other cytoplasmic organelle;other cell component	transporter activity;enzyme regulator activity;cytoskeletal activity;other molecular function	Pf00191	302	ENSG00000182718	ANXA2	hsa:302; P07355; Q567R4; Q6N0B3; Q8TBV2; Q96DD5; Q9UDH8	Gastrin signaling pathway; CCL18 signaling pathway; Prostaglandin synthesis and regulation	Gene and protein expression by JAK-STAT signaling after Interleukin-12 stimulation; Neutrophil degranulation; Smooth Muscle Contraction; Dissolution of Fibrin Clot	7	0	0.821	0.809233	0.974118	50.45	90.5	109.5	23.72	37.96	High	High	High	High	High	High	1
FALSE	High	Master Protein	Q05682	Caldesmon [OS=Homo sapiens]	0	205.966	39	33	242	33	793	93.2	5.66	646.28	33	cell organization and biogenesis;developmental processes;other biological processes	plasma membrane;other membranes;cytosol;cytoskeleton	cytoskeletal activity;other molecular function	Pf02029	800	ENSG00000122786	CALD1	A8K0X1; hsa:800; Q05682; Q13978; Q13979; Q14741; Q14742; Q9UD91	Myometrial relaxation and contraction pathways	Smooth Muscle Contraction	2	0	0.781	0.67538	0.951816	67.02	87.4	112.6	68.08	3.02	High	High	High	High	High	High	1	Acetyl [N-Term]
TRUE	High	Master Protein	P06727	Apolipoprotein A-IV [OS=Homo sapiens]	0	169.239	60	27	239	27	396	45.3	5.38	626.18	27	cell adhesion;cell organization and biogenesis;protein metabolism;other metabolic processes;stress response;transport;developmental processes;other biological processes	non-structural extracellular;cytosol;ER/Golgi;other cytoplasmic organelle;other cell component	transporter activity;enzyme regulator activity;other molecular function	Pf01442	337	ENSG00000110244	APOA4	A8MSL6; hsa:337; P06727; Q14CW8; Q6Q787	Statin inhibition of cholesterol production; Familial hyperlipidemia type 1; Familial hyperlipidemia type 2; Familial hyperlipidemia type 3; Familial hyperlipidemia type 4; Familial hyperlipidemia type 5; Cholesterol metabolism; Enterocyte cholesterol metabolism	Amyloid fiber formation; Retinoid metabolism and transport; Chylomicron assembly; Chylomicron remodeling; Assembly of active LPL and LIPC lipase complexes	13	0	2.455	0.000314835	0.00673466	135.23	180.3	19.7	89.31	128.17	High	High	High	High	High	High	1
FALSE	High	Master Protein	P55084	Trifunctional enzyme subunit beta, mitochondrial [OS=Homo sapiens]	0	149.68	58	22	238	22	474	51.3	9.41	653.29	22	other metabolic processes;other biological processes	other membranes;mitochondrion;ER/Golgi	nucleic acid binding activity;other molecular function	Pf00108, Pf02803	3032	ENSG00000138029	HADHB	B2RB16; B4E2W0; hsa:3032; O14969; P55084; Q53TA6; Q96C77; Q9H3F5; Q9T2V8	Fatty acid beta-oxidation; Valproic acid pathway; Female steroid hormones in cardiomyocyte energy metabolism; Sudden infant death syndrome (SIDS) susceptibility pathways	Acyl chain remodeling of CL; mitochondrial fatty acid beta-oxidation of unsaturated fatty acids; Beta oxidation of decanoyl-CoA to octanoyl-CoA-CoA; Beta oxidation of octanoyl-CoA to hexanoyl-CoA; Beta oxidation of hexanoyl-CoA to butanoyl-CoA; Beta oxidation of myristoyl-CoA to lauroyl-CoA; Beta oxidation of lauroyl-CoA to decanoyl-CoA-CoA; Beta oxidation of palmitoyl-CoA to myristoyl-CoA	12	0	0.837	0.860518	0.987391	72.23	106.6	93.4	51.08	54.12	High	High	High	High	High	High	1
FALSE	High	Master Protein	Q93052	Lipoma-preferred partner [OS=Homo sapiens]	0	210.85	61	24	238	24	612	65.7	7.37	680.61	24	cell adhesion	plasma membrane;other membranes;cytosol;cytoskeleton;nucleus;other cell component	other molecular function	Pf00412	4026	ENSG00000145012	LPP	A1L4L6; D3DNV6; hsa:4026; Q8NFX5; Q93052	MFAP5 effect on permeability and motility of endothelial cells via cytoskeleton rearrangement		1	0	1.084	0.463858	0.898926	53.23	106.9	93.1	19.81	34.76	High	High	High	High	High	High	1
FALSE	High	Master Protein	P18859	ATP synthase-coupling factor 6, mitochondrial [OS=Homo sapiens]	0	113.761	49	9	237	9	108	12.6	9.52	881.52	9	other metabolic processes;transport	other membranes;mitochondrion	transporter activity	Pf05511	522	ENSG00000154723	ATP5PF	hsa:522; J3KQ83; P18859	Electron transport chain: OXPHOS system in mitochondria; Oxidative phosphorylation	Mitochondrial protein degradation; Cristae formation; Formation of ATP by chemiosmotic coupling	5	0	0.694	0.406299	0.874983	97.46	72.3	127.7	64.75	62.64	High	High	High	High	High	High	1
FALSE	High	Master Protein	Q16718	NADH dehydrogenase [ubiquinone] 1 alpha subcomplex subunit 5 [OS=Homo sapiens]	0	117.594	75	12	236	12	116	13.5	5.99	854.61	12	cell organization and biogenesis;other metabolic processes;transport	other membranes;mitochondrion	transporter activity	Pf04716	4698	ENSG00000128609	NDUFA5	B2RD98; hsa:4698; Q16718; Q5H9R2; Q6IRX7	Electron transport chain: OXPHOS system in mitochondria; Ciliary landscape; Nonalcoholic fatty liver disease; Oxidative phosphorylation	RHOG GTPase cycle; Complex I biogenesis	7	0	0.882	0.99151	0.999898	74.94	112.2	87.8	35.81	51.61	High	High	High	High	High	High	1
FALSE	High	Master Protein	P36957	Dihydrolipoyllysine-residue succinyltransferase component of 2-oxoglutarate dehydrogenase complex, mitochondrial [OS=Homo sapiens]	0	131.219	43	16	236	16	453	48.7	8.95	650.59	16	protein metabolism;other metabolic processes	cytosol;mitochondrion;nucleus;other cell component	other molecular function	Pf00198, Pf00364	1743	ENSG00000119689	DLST	B7Z5W8; E7ESY5; hsa:1743; P36957; Q7LDY7; Q9BQ32	TCA cycle and deficiency of pyruvate dehydrogenase complex (PDHc); Amino acid metabolism; Metabolic reprogramming in colon cancer; 7q11.23 copy number variation syndrome; 1p36 copy number variation syndrome; 10q11.21q11.23 copy number variation syndrome; TCA cycle (aka Krebs or citric acid cycle)	Citric acid cycle (TCA cycle); Glyoxylate metabolism and glycine degradation; Lysine catabolism	10	0	1.245	0.222537	0.708259	73.53	123.9	76.1	50.51	48.62	High	High	High	High	High	High	1
FALSE	High	Master Protein	Q9UIJ7	GTP:AMP phosphotransferase AK3, mitochondrial [OS=Homo sapiens]	0	134.721	73	18	235	18	227	25.6	9.16	588.45	18	other metabolic processes;stress response	mitochondrion;other cell component	kinase activity;other molecular function	Pf00406, Pf05191	50808	ENSG00000147853	AK3	B4DP58; D3DRI1; E7ET30; hsa:50808; Q5VYW6; Q9H576; Q9HC01; Q9NPB4; Q9UIJ7		Factors involved in megakaryocyte development and platelet production	1	0	1.708	0.0199112	0.193502	88.53	142.2	57.8	35.98	94	High	High	High	High	High	High	1
FALSE	High	Master Protein	P55072	Transitional endoplasmic reticulum ATPase [OS=Homo sapiens]	0	213.674	64	39	234	39	806	89.3	5.26	622.13	39	cell cycle OR cell proliferation;cell organization and biogenesis;protein metabolism;DNA metabolism;other metabolic processes;stress response;transport;signal transduction;other biological processes	non-structural extracellular;other membranes;cytosol;ER/Golgi;nucleus;other cytoplasmic organelle;other cell component	signal transduction activity or receptor binding;enzyme regulator activity;other molecular function	Pf00004, Pf02359, Pf02933, Pf17862	7415	ENSG00000165280	VCP	B2R5T8; P55072; Q0V924; Q2TAI5; Q969G7; Q9UCD5; V9HW80	Alstrom syndrome; Clock-controlled autophagy in bone metabolism; HDAC6 interactions in the central nervous system	Neutrophil degranulation; ABC-family proteins mediated transport; Hedgehog ligand biogenesis; Hh mutants are degraded by ERAD; Defective CFTR causes cystic fibrosis; Neddylation; KEAP1-NFE2L2 pathway; RHOH GTPase cycle; E3 ubiquitin ligases ubiquitinate target proteins; Aggrephagy; Attachment and Entry; Attachment and Entry; Ovarian tumor domain proteases; Josephin domain DUBs; Protein methylatio…	21	0	0.79	0.706862	0.960029	59.93	91.6	108.4	45.09	15.49	High	High	High	High	High	High	1
FALSE	High	Master Protein	P00739	Haptoglobin-related protein [OS=Homo sapiens]	0	121.782	48	17	233	4	348	39	7.09	584.83	17		non-structural extracellular	other molecular function	Pf00089	3250	ENSG00000261701	HPR	hsa:3250; P00739; Q7LE20; Q92658; Q92659; Q9ULB0		Scavenging of heme from plasma	1	0	0.587	0.290321	0.785057	114.85	129	71	56.73	131.31	High	High	High	High	High	High	1
FALSE	High	Master Protein	Q16555	Dihydropyrimidinase-related protein 2 [OS=Homo sapiens]	0	198.751	67	28	228	25	572	62.3	6.38	608.07	28	cell organization and biogenesis;other metabolic processes;transport;developmental processes;signal transduction;other biological processes	plasma membrane;other membranes;cytosol;cytoskeleton	other molecular function	Pf01979	1808	ENSG00000092964	DPYSL2	A8K5H2; B4DR31; D3DSS7; hsa:1808; O00424; Q16555	Microtubule cytoskeleton regulation; Brain-derived neurotrophic factor (BDNF) signaling pathway	Recycling pathway of L1; CRMPs in Sema3A signaling	4	3	0.897	0.945915	0.996797	53.94	104.7	95.3	27.67	22.49	High	High	High	High	High	High	1
FALSE	High	Master Protein	Q53GG5	PDZ and LIM domain protein 3 [OS=Homo sapiens]	0	153.556	63	15	228	15	364	39.2	6.89	755.39	15	cell organization and biogenesis;developmental processes;other biological processes	cytosol;cytoskeleton;other cell component	cytoskeletal activity;other molecular function	Pf00412, Pf00595, Pf15936	27295	ENSG00000154553	PDLIM3	B2R866; hsa:27295; O43590; O60439; O60440; Q53GG5; Q8N6Y6; Q9BVP4			0	0	0.935	0.829867	0.978558	76.59	107.2	92.8	19.82	42.83	High	High	High	High	High	High	1
FALSE	High	Master Protein	Q16836	Hydroxyacyl-coenzyme A dehydrogenase, mitochondrial [OS=Homo sapiens]	0	119.873	67	13	226	13	314	34.3	8.85	703.4	13	other metabolic processes;other biological processes	mitochondrion;nucleus;other cell component	other molecular function	Pf00725, Pf02737	3033	ENSG00000138796	HADH	hsa:3033; J3KQ17; O00324; O00397; O00753; Q16836; Q4W5B4	Fatty acid beta-oxidation; Fatty acid biosynthesis; Mitochondrial long chain fatty acid beta-oxidation; Amino acid metabolism; IL-18 signaling pathway; Mitochondrial fatty acid oxidation disorders	Mitochondrial protein degradation; Beta oxidation of decanoyl-CoA to octanoyl-CoA-CoA; Beta oxidation of octanoyl-CoA to hexanoyl-CoA; Beta oxidation of hexanoyl-CoA to butanoyl-CoA; Beta oxidation of butanoyl-CoA to acetyl-CoA; Beta oxidation of lauroyl-CoA to decanoyl-CoA-CoA	12	0	0.783	0.682367	0.952994	80.96	85.6	114.4	61.92	23.3	High	High	High	High	High	High	1
FALSE	High	Master Protein	Q6NZI2	Caveolae-associated protein 1 [OS=Homo sapiens]	0	126.976	36	13	226	13	390	43.5	5.6	701	13	RNA metabolism OR transcription;other metabolic processes;transport;other biological processes	plasma membrane;other membranes;cytosol;mitochondrion;ER/Golgi;nucleus;other cell component	nucleic acid binding activity;other molecular function	Pf15237	284119	ENSG00000177469	CAVIN1	B2RAW7; hsa:284119; O00535; Q6GMY1; Q6NZI2; Q96H74; Q9BT85; Q9HAP4	Congenital generalized lipodystrophy	RHOC GTPase cycle; RHOA GTPase cycle; RHOB GTPase cycle; RNA Polymerase I Transcription Termination	5	0	1.346	0.135489	0.599812	43.54	113	87	29.77	20.31	High	High	High	High	High	High	1
FALSE	High	Master Protein	Q02218	2-oxoglutarate dehydrogenase complex component E1 [OS=Homo sapiens]	0	221.704	52	38	224	38	1023	115.9	6.86	597.22	38	protein metabolism;other metabolic processes;developmental processes	other membranes;mitochondrion;nucleus;other cell component	other molecular function	Pf00676, Pf02779, Pf16078, Pf16870	4967	ENSG00000105953	OGDH	B4E2U9; D3DVL0; E9PBM1; hsa:4967; Q02218; Q96DD3; Q9UDX0	TCA cycle and deficiency of pyruvate dehydrogenase complex (PDHc); Amino acid metabolism; Thiamine metabolic pathways; 7q11.23 copy number variation syndrome; TCA cycle (aka Krebs or citric acid cycle)	Lysine catabolism; Glyoxylate metabolism and glycine degradation; Citric acid cycle (TCA cycle); Mitochondrial protein degradation	9	0	0.512	0.0572637	0.366866	89.32	57.6	142.4	67.07	58.17	High	High	High	High	High	High	1
FALSE	High	Master Protein	Q8N3V7	Synaptopodin [OS=Homo sapiens]	0	196.193	46	26	220	26	929	99.4	8.72	638.2	26	cell organization and biogenesis;other biological processes	plasma membrane;other membranes;cytosol;cytoskeleton;nucleus;other cell component	cytoskeletal activity		11346	ENSG00000171992	SYNPO	A5PKZ8; D3DQG8; hsa:11346; O15271; Q8N3V7; Q9UPX1	Primary focal segmental glomerulosclerosis (FSGS); Nephrotic syndrome		2	0	1.035	0.569099	0.928581	64.53	107.9	92.1	20.48	35.52	High	High	High	High	High	High	1
FALSE	High	Master Protein	P07108	Acyl-CoA-binding protein [OS=Homo sapiens]	0	62.848	66	6	219	6	87	10	6.57	646.26	6	other metabolic processes;other biological processes	ER/Golgi;other cell component	signal transduction activity or receptor binding;other molecular function	Pf00887	1622	ENSG00000155368	DBI	B8ZWD2; B8ZWD6; B8ZWD7; hsa:1622; P07108; P08869; Q4VWZ6; Q53SQ7; Q6IB48; Q9UCI8	Sterol regulatory element-binding proteins (SREBP) signaling; PPAR-alpha pathway; Nuclear receptors meta-pathway; PPAR signaling pathway; Fatty acid transporters	Mitochondrial Fatty Acid Beta-Oxidation	6	0	0.755	0.592544	0.929987	89.54	98.7	101.3	76.85	34.54	High	High	High	High	High	High	1
FALSE	High	Master Protein	P01834	Immunoglobulin kappa constant [OS=Homo sapiens]	0	69.711	80	6	218	2	107	11.8	6.52	684.22	6	signal transduction;other biological processes	non-structural extracellular;plasma membrane;other membranes;other cell component	other molecular function	Pf07654			IGKC	A0A075B6H6; A0A087X130; P01834		Initial triggering of complement; Classical antibody-mediated complement activation; Immunoregulatory interactions between a Lymphoid and a non-Lymphoid cell; Cell surface interactions at the vascular wall; FCGR activation; Regulation of actin dynamics for phagocytic cup formation; Role of phospholipids in phagocytosis; Scavenging of heme from plasma; Role of LAT2/NTAL/LAB on calcium mobilization…	19	0	1.063	0.518138	0.90826	76.31	100.9	99.1	62.95	78.62	High	High	High	High	High	High	1
FALSE	High	Master Protein	P23142	Fibulin-1 [OS=Homo sapiens]	0	205.198	53	25	218	25	703	77.2	5.22	569.25	25	cell organization and biogenesis;protein metabolism;other metabolic processes;stress response;developmental processes;other biological processes	non-structural extracellular;extracellular matrix	signal transduction activity or receptor binding;enzyme regulator activity;extracellular structural activity;other molecular function	Pf01821, Pf07645, Pf12662	2192	ENSG00000077942	FBLN1	B0QY42; B1AHL4; hsa:2192; P23142; P23143; P23144; P37888; Q5TIC4; Q8TBH8; Q9HBQ5; Q9UC21; Q9UGR4; Q9UH41		Molecules associated with elastic fibres	1	0	0.527	0.0721768	0.422974	98.3	68.5	131.5	7.56	92.86	High	High	High	High	High	High	1
FALSE	High	Master Protein	Q16698	2,4-dienoyl-CoA reductase [(3E)-enoyl-CoA-producing], mitochondrial [OS=Homo sapiens]	0	105.058	50	15	217	15	335	36	9.28	619.54	15	other metabolic processes;other biological processes	cytosol;mitochondrion;nucleus;other cell component	other molecular function	Pf13561	1666	ENSG00000104325	DECR1	B7Z6B8; hsa:1666; Q16698; Q2M304; Q93085	Fatty acid beta-oxidation; Fatty acid biosynthesis; VEGFA-VEGFR2 signaling; Omega-6-fatty acids in senescence	mitochondrial fatty acid beta-oxidation of unsaturated fatty acids	5	0	0.818	0.800459	0.973515	51.51	98.4	101.6	54.14	23.45	High	High	High	High	High	High	1
FALSE	High	Master Protein	P13639	Elongation factor 2 [OS=Homo sapiens]	0	174.168	45	31	217	31	858	95.3	6.83	568.92	31	protein metabolism;other metabolic processes;other biological processes	non-structural extracellular;plasma membrane;other membranes;cytosol;other cell component	translation activity;nucleic acid binding activity;other molecular function	Pf00009, Pf00679, Pf03144, Pf03764, Pf14492	1938	ENSG00000167658	EEF2	A0A384N6H1; B2RMP5; D6W618; hsa:1938; P13639; Q58J86	Translation factors; AMP-activated protein kinase signaling; Brain-derived neurotrophic factor (BDNF) signaling pathway; IL-18 signaling pathway	Neutrophil degranulation; Protein methylation; Uptake and function of diphtheria toxin; Peptide chain elongation; Synthesis of diphthamide-EEF2	9	0	0.728	0.506422	0.905271	51.91	92.2	107.8	31.24	16.87	High	High	High	High	High	High	1
FALSE	High	Master Protein	O14558	Heat shock protein beta-6 [OS=Homo sapiens]	0	93.723	94	9	215	9	160	17.1	6.4	629.05	9	protein metabolism;other metabolic processes;stress response;other biological processes	non-structural extracellular;cytosol;mitochondrion;nucleus;other cell component	other molecular function	Pf00011, Pf00525	126393	ENSG00000004776	HSPB6	hsa:126393; O14551; O14558; Q6NVI3; Q96MG9			0	0	0.878	0.996196	0.999898	58.63	89.1	110.9	25.66	24.25	High	High	High	High	High	High	1	Acetyl [N-Term]
FALSE	High	Master Protein	P30405	Peptidyl-prolyl cis-trans isomerase F, mitochondrial [OS=Homo sapiens]	0	101.003	59	9	213	7	207	22	9.38	717.41	9	cell organization and biogenesis;protein metabolism;other metabolic processes;stress response;transport;other biological processes	other membranes;mitochondrion;other cell component	other molecular function	Pf00160	10105	ENSG00000108179	PPIF	hsa:10105; P30405; Q2YDB7; Q5W131	Alzheimer's disease and miRNA effects; Alzheimer's disease		2	2	0.834	0.852908	0.985154	78.91	121.2	78.8	48.23	54.87	High	High	High	High	High	High	1
FALSE	High	Master Protein	P0C0L5	Complement C4-B [OS=Homo sapiens]	0	230.302	36	44	211	3	1744	192.6	7.27	542.31	44	stress response;other biological processes	non-structural extracellular;plasma membrane;other membranes;other cell component	enzyme regulator activity;other molecular function	Pf00207, Pf01759, Pf01821, Pf01835, Pf07677, Pf07678, Pf07703, Pf17789, Pf17791, Pf21145	100293534; 721	ENSG00000224389; ENSG00000228267; ENSG00000228454; ENSG00000233312; ENSG00000236625	C4B; C4B_2	A2BHY4; hsa:100293534; hsa:721; P01028; P0C0L5; P78445; Q13160; Q13906; Q14033; Q14835; Q6U2E9; Q6U2G1; Q6U2I5; Q6U2L1; Q6U2L7; Q6U2L9; Q6U2M5; Q6VCV8; Q96SA7; Q9NPK5; Q9UIP5	Allograft rejection; Dengue-2 interactions with complement and coagulation cascades; Oxidative damage response; Complement system in neuronal development and plasticity; Complement activation; Complement and coagulation cascades; Sudden infant death syndrome (SIDS) susceptibility pathways	Initial triggering of complement; Regulation of Complement cascade; Activation of C3 and C5	10	0	0.65	0.382735	0.861339	93.4	78.1	121.9	28.86	7.34	High	High	High	High	High	High	1
TRUE	High	Master Protein	Q05639	Elongation factor 1-alpha 2 [OS=Homo sapiens]	0	127.134	57	15	211	9	463	50.4	9.03	673.85	15	protein metabolism;other metabolic processes;other biological processes	other membranes;other cytoplasmic organelle;other cell component	nucleic acid binding activity;other molecular function	Pf00009, Pf03143, Pf03144	1917	ENSG00000101210	EEF1A2	B5BUF3; E1P5J1; hsa:1917; P54266; Q05639; Q0VGC7	Translation factors	Eukaryotic Translation Elongation	2	0	0.449	0.0272976	0.229216	77.35	66.7	133.3	43.04	13.16	High	High	High	High	High	High	1
FALSE	High	Master Protein	P49748	Very long-chain specific acyl-CoA dehydrogenase, mitochondrial [OS=Homo sapiens]	0	194.444	57	33	209	33	655	70.3	8.75	521.7	33	other metabolic processes;stress response;other biological processes	other membranes;mitochondrion;nucleus	other molecular function	Pf00441, Pf02770, Pf02771, Pf21343	37	ENSG00000072778	ACADVL	B4DEB6; F5H2A9; hsa:37; O76056; P49748; Q8WUL0	Fatty acid beta-oxidation; Mitochondrial long chain fatty acid beta-oxidation	XBP1(S) activates chaperone genes; Beta oxidation of palmitoyl-CoA to myristoyl-CoA	4	0	0.627	0.233867	0.723325	75.72	88.9	111.1	59.79	49.76	High	High	High	High	High	High	1
FALSE	High	Master Protein	P56385	ATP synthase subunit e, mitochondrial [OS=Homo sapiens]	0	43.268	67	6	209	6	69	7.9	9.35	414.05	6	other metabolic processes;transport	other membranes;mitochondrion	transporter activity	Pf05680	521	ENSG00000169020	ATP5ME	hsa:521; P56385; Q0D2L9	Electron transport chain: OXPHOS system in mitochondria; Oxidative phosphorylation	Cristae formation; Formation of ATP by chemiosmotic coupling	4	0	1.311	0.161415	0.6525	77.59	133.4	66.6	36.89	76.43	High	High	High	High	High	High	1
FALSE	High	Master Protein	P51911	Calponin-1 [OS=Homo sapiens]	0	131.332	74	17	207	17	297	33.2	9.07	603.79	17	cell organization and biogenesis;other biological processes	cytoskeleton	cytoskeletal activity;other molecular function	Pf00307, Pf00402	1264	ENSG00000130176	CNN1	B2R868; B4DUX6; hsa:1264; O00638; P51911; Q15416; Q8IY93; Q99438	Endothelin pathways; Myometrial relaxation and contraction pathways		2	0	0.543	0.0905815	0.479719	104.36	67.1	132.9	102.08	21.27	High	High	High	High	High	High	1
FALSE	High	Master Protein	Q5VST9	Obscurin [OS=Homo sapiens]	0	252.843	14	68	206	68	7968	867.9	5.99	464.92	68	cell organization and biogenesis;other metabolic processes;other biological processes	plasma membrane;other membranes;cytosol;cytoskeleton;nucleus	enzyme regulator activity;cytoskeletal activity;kinase activity;other molecular function	Pf00041, Pf00069, Pf00169, Pf00612, Pf00621, Pf07679	84033	ENSG00000154358	OBSCN	hsa:84033; Q2A664; Q5T7G8; Q5T7G9; Q5VST9; Q5VSU2; Q86YC7; Q8NHN0; Q8NHN1; Q8NHN2; Q8NHN3; Q8NHN4; Q8NHN5; Q8NHN6; Q8NHN7; Q8NHN8; Q8NHN9; Q96AA2; Q9HCD3; Q9HCL6		RHOA GTPase cycle; NRAGE signals death through JNK; G alpha (12/13) signalling events; RHOQ GTPase cycle	4	0	0.934	0.822261	0.976866	63.05	98.6	101.4	25.7	44.78	High	High	High	High	High	High	1	Acetyl [N-Term]
FALSE	High	Master Protein	P51970	NADH dehydrogenase [ubiquinone] 1 alpha subcomplex subunit 8 [OS=Homo sapiens]	0	110.212	63	9	206	9	172	20.1	7.65	551.41	9	cell organization and biogenesis;other metabolic processes;transport	other membranes;mitochondrion	transporter activity;other molecular function	Pf06747	4702	ENSG00000119421	NDUFA8	B1AM93; hsa:4702; P51970; Q9Y6N0	Electron transport chain: OXPHOS system in mitochondria; Nonalcoholic fatty liver disease; Oxidative phosphorylation	Complex I biogenesis	5	0	1.277	0.190599	0.676371	87.92	123.8	76.2	43.11	83.02	High	High	High	High	High	High	1
TRUE	High	Master Protein	P06744	Glucose-6-phosphate isomerase [OS=Homo sapiens]	0	147.634	47	20	206	20	558	63.1	8.32	545.66	20	other metabolic processes;stress response;developmental processes;signal transduction;other biological processes	non-structural extracellular;plasma membrane;other membranes;cytosol;other cell component	signal transduction activity or receptor binding;other molecular function	Pf00342	2821	ENSG00000105220	GPI	B4DG39; hsa:2821; P06744; Q9BRD3; Q9BSK5; Q9UHE6	Cori cycle; Clear cell renal cell carcinoma pathways; Metabolic reprogramming in colon cancer; Aerobic glycolysis; N-glycan biosynthesis; Disorders of fructose metabolism; Glycolysis and gluconeogenesis; Metabolic Epileptic Disorders; UDP-derived sugars synthesis in fibroblasts	Neutrophil degranulation; Glycolysis; Gluconeogenesis; TP53 Regulates Metabolic Genes	13	0	0.457	0.0214753	0.20455	76	76.5	123.5	45.15	44.16	High	High	High	High	High	High	1
FALSE	High	Master Protein	P0C0L4	Complement C4-A [OS=Homo sapiens]	0	222.157	36	44	205	3	1744	192.7	7.08	520.12	44	stress response;other biological processes	non-structural extracellular;plasma membrane;other membranes;ER/Golgi;other cell component	enzyme regulator activity;other molecular function	Pf00207, Pf01759, Pf01821, Pf01835, Pf07677, Pf07678, Pf07703, Pf17789, Pf17791, Pf21145	720; 721	ENSG00000206340; ENSG00000227746; ENSG00000244731	C4A	A6H8M8; A6NHJ5; A7E2V2; B0QZR6; B0V2C8; B2RUT6; B7ZVZ6; hsa:720; hsa:721; P01028; P0C0L4; P78445; Q13160; Q13906; Q14033; Q14835; Q4LE82; Q5JNX2; Q5JQM8; Q6P4R1; Q6U2E5; Q6U2E8; Q6U2F0; Q6U2F3; Q6U2F4; Q6U2F6; Q6U2F8; Q6U2G0; Q96EG2; Q96SA8; Q9NPK5; Q9UIP5	Allograft rejection; Complement system; Dengue-2 interactions with complement and coagulation cascades; Complement system in neuronal development and plasticity; Complement activation; Complement and coagulation cascades; Sudden infant death syndrome (SIDS) susceptibility pathways	Regulation of Insulin-like Growth Factor (IGF) transport and uptake by Insulin-like Growth Factor Binding Proteins (IGFBPs); Post-translational protein phosphorylation; Regulation of Complement cascade; Initial triggering of complement; Activation of C3 and C5	12	40	0.671	0.341999	0.831437	79	91.2	108.8	7.59	30.85	Peak Found	High	High	High	High	High	1
FALSE	High	Master Protein	P00751	Complement factor B [OS=Homo sapiens]	0	167.147	46	30	203	30	764	85.5	7.06	547.2	30	protein metabolism;stress response;other biological processes	non-structural extracellular;plasma membrane;other membranes	other molecular function	Pf00084, Pf00089, Pf00092	629	ENSG00000239754; ENSG00000241253; ENSG00000241534; ENSG00000242335; ENSG00000243570; ENSG00000243649	CFB	B0QZQ6; hsa:629; O15006; P00751; Q29944; Q53F89; Q5JP67; Q5ST50; Q96HX6; Q9BTF5; Q9BX92	Complement system; Dengue-2 interactions with complement and coagulation cascades; Complement system in neuronal development and plasticity; Acquired partial lipodystrophy / Barraquer-Simons syndrome; Network map of SARS-CoV-2 signaling pathway; Comprehensive IL-17A signaling; Complement activation; Complement and coagulation cascades	Regulation of Complement cascade; Alternative complement activation; Activation of C3 and C5	11	0	0.827	0.827884	0.978558	56.45	103.8	96.2	27.37	40.82	High	High	High	High	High	High	1
FALSE	High	Master Protein	P25311	Zinc-alpha-2-glycoprotein [OS=Homo sapiens]	0	149.537	53	18	203	18	298	34.2	6.05	575.48	18	cell adhesion;transport;other biological processes	non-structural extracellular;plasma membrane;other membranes	transporter activity;other molecular function	Pf00129, Pf07654	563	ENSG00000160862	AZGP1	D6W5T8; hsa:563; O60386; P25311; Q5XKQ4; Q8N4N0		Miscellaneous transport and binding events	1	0	0.96	0.75899	0.969611	79.8	67	133	63.45	43.44	High	High	High	High	High	High	1
FALSE	High	Master Protein	P02750	Leucine-rich alpha-2-glycoprotein [OS=Homo sapiens]	0	91.391	50	13	201	13	347	38.2	6.95	555.92	13	cell adhesion;stress response;other biological processes	non-structural extracellular;other membranes;other cell component	signal transduction activity or receptor binding	Pf13855	116844	ENSG00000171236	LRG1	hsa:116844; P02750; Q8N4F5; Q96QZ4	Network map of SARS-CoV-2 signaling pathway	Neutrophil degranulation	2	0	0.722	0.48774	0.903802	73.27	91.9	108.1	57.29	47.54	High	High	High	High	High	High	1
FALSE	High	Master Protein	P11216	Glycogen phosphorylase, brain form [OS=Homo sapiens]	0	180.833	48	37	201	31	843	96.6	6.86	504.51	37	other metabolic processes	non-structural extracellular;other cytoplasmic organelle;other cell component	other molecular function	Pf00343	5834	ENSG00000100994	PYGB	hsa:5834; P11216; Q96AK1; Q9NPX8	IL-18 signaling pathway; Glycogen synthesis and degradation	Neutrophil degranulation; Glycogen breakdown (glycogenolysis)	4	6	0.594	0.168055	0.662126	87.42	79.2	120.8	68.07	48.72	High	High	High	High	High	High	1
FALSE	High	Master Protein	O95425	Supervillin [OS=Homo sapiens]	0	215.021	25	39	200	39	2214	247.6	6.98	528.25	39	cell organization and biogenesis;other biological processes	plasma membrane;other membranes;cytosol;cytoskeleton;nucleus;other cell component	cytoskeletal activity;other molecular function	Pf00626, Pf02209	6840	ENSG00000197321	SVIL	D3DRW9; hsa:6840; M1J557; O60611; O60612; O95425; Q5VZK5; Q5VZK6; Q9H1R7			0	0	0.859	0.932756	0.995934	73.05	113.1	86.9	36.66	45.86	High	High	High	High	High	High	1
FALSE	High	Master Protein	P01042	Kininogen-1 [OS=Homo sapiens]	0	124.236	33	20	199	20	644	71.9	6.81	531.54	20	stress response;signal transduction;other biological processes	plasma membrane;other membranes;ER/Golgi;other cell component	signal transduction activity or receptor binding;enzyme regulator activity;other molecular function	Pf00031	3827	ENSG00000113889	KNG1	A8K474; B2RCR2; C9JEX1; hsa:3827; P01042; P01043; Q53EQ0; Q6PAU9; Q7M4P1	Vitamin D receptor pathway; Dengue-2 interactions with complement and coagulation cascades; Cells and molecules involved in local acute inflammatory response ; RAS and bradykinin pathways in COVID-19; ACE inhibitor pathway; Complement and coagulation cascades	G alpha (q) signalling events; Peptide ligand-binding receptors; Intrinsic Pathway of Fibrin Clot Formation; G alpha (i) signalling events; Platelet degranulation ; Regulation of Insulin-like Growth Factor (IGF) transport and uptake by Insulin-like Growth Factor Binding Proteins (IGFBPs); Post-translational protein phosphorylation	13	0	0.771	0.644504	0.941335	74.89	86.1	113.9	16.79	46.92	High	High	High	High	High	High	1
FALSE	High	Master Protein	P28331	NADH-ubiquinone oxidoreductase 75 kDa subunit, mitochondrial [OS=Homo sapiens]	0	152.257	54	28	199	28	727	79.4	6.23	527.46	28	cell organization and biogenesis;other metabolic processes;transport;other biological processes	other membranes;mitochondrion	transporter activity;other molecular function	Pf00384, Pf09326, Pf10588, Pf13510	4719	ENSG00000023228; ENSG00000283447	NDUFS1	B4DIN9; B4DJA0; B4DPG1; B4DUC1; E7ENF3; hsa:4719; P28331; Q53TR8; Q8N1C4; Q8TCC9	Electron transport chain: OXPHOS system in mitochondria; Nonalcoholic fatty liver disease; Oxidative phosphorylation	Complex I biogenesis; Mitochondrial protein degradation	6	0	0.698	0.416177	0.878953	65.17	93.2	106.8	46.34	24.11	High	High	High	High	High	High	1
TRUE	High	Master Protein	P12235	ADP/ATP translocase 1 [OS=Homo sapiens]	0	102.296	64	17	199	10	298	33	9.76	493.68	17	cell organization and biogenesis;other metabolic processes;transport;other biological processes	plasma membrane;other membranes;mitochondrion	transporter activity	Pf00153	291	ENSG00000151729	SLC25A4	D3DP59; hsa:291; P12235	Electron transport chain: OXPHOS system in mitochondria; Alzheimer's disease and miRNA effects; Synaptic vesicle pathway; Alzheimer's disease; Sudden infant death syndrome (SIDS) susceptibility pathways	Transport of nucleosides and free purine and pyrimidine bases across the plasma membrane; Mitochondrial protein import; Vpr-mediated induction of apoptosis by mitochondrial outer membrane permeabilization	8	7	0.481	0.0340312	0.268671	89.78	79.1	120.9	59.38	51.05	High	High	High	High	High	High	1
FALSE	High	Master Protein	Q15181	Inorganic pyrophosphatase [OS=Homo sapiens]	0	110.058	71	18	198	17	289	32.6	5.86	503.41	18	other metabolic processes	cytosol;other cell component	other molecular function	Pf00719	5464	ENSG00000180817	PPA1	hsa:5464; Q15181; Q2M348; Q5SQT7; Q6P7P4; Q9UQJ5; Q9Y5B1		Cytosolic tRNA aminoacylation; Pyrophosphate hydrolysis	2	1	0.871	0.973354	0.999898	61.6	105.1	94.9	43.44	50.81	High	High	High	High	High	High	1
FALSE	High	Master Protein	A0A0B4J2D5	Putative glutamine amidotransferase-like class 1 domain-containing protein 3B, mitochondrial [OS=Homo sapiens]	0	104.658	61	12	198	12	268	28.1	8.27	534.89	12		mitochondrion			8209		GATD3B	A0A0B4J2D5; A6NFJ6; A6NJY7; hsa:8209; O00650; O00660; O15011; O15012; P30042; P55346; P78474; Q92505; Q92507	Gastric cancer network 1		1	0	1.159	0.333244	0.823751	57.76	126.7	73.3	34.33	49.4	High	High	High	High	High	High	1
FALSE	High	Master Protein	P07585	Decorin [OS=Homo sapiens]	0	99.888	47	14	197	13	359	39.7	8.54	608.41	14	other biological processes	ER/Golgi;other cytoplasmic organelle	extracellular structural activity;other molecular function	Pf01462, Pf13855	1634	ENSG00000011465	DCN	hsa:1634; P07585; Q9P0Z0; Q9P0Z1; Q9Y5N8; Q9Y5N9	Complement system; BMP2-WNT4-FOXO1 pathway in primary endometrial stromal cell differentiation; Markers of kidney cell lineage	ECM proteoglycans; Degradation of the extracellular matrix; A tetrasaccharide linker sequence is required for GAG synthesis; Defective B4GALT7 causes EDS, progeroid type; Defective B3GAT3 causes JDSSDHD; Defective B3GALT6 causes EDSP2 and SEMDJL1; Chondroitin sulfate biosynthesis; Dermatan sulfate biosynthesis; CS/DS degradation; Defective CHST3 causes SEDCJD; Defective CHST14 causes EDS, musculo…	15	0	0.522	0.0668509	0.405019	58.28	65.1	134.9	24.81	33.67	High	High	High	High	High	High	1
FALSE	High	Master Protein	P07858	Cathepsin B [OS=Homo sapiens]	0	127.601	42	13	196	13	339	37.8	6.3	543.74	13	protein metabolism;other metabolic processes;other biological processes	non-structural extracellular;plasma membrane;other membranes;other cytoplasmic organelle;other cell component	other molecular function	Pf00112, Pf08127	1508	ENSG00000164733; ENSG00000285132	CTSB	B3KQR5; B3KRR5; hsa:1508; P07858; Q503A6; Q96D87	Ebola virus infection in host; 8p23.1 copy number variation syndrome	Neutrophil degranulation; MHC class II antigen presentation; Collagen degradation; Assembly of collagen fibrils and other multimeric structures; Trafficking and processing of endosomal TLR	7	0	1.211	0.262131	0.761533	90.04	108.3	91.7	60.06	68.06	High	High	High	High	High	High	1
FALSE	High	Master Protein	P48047	ATP synthase subunit O, mitochondrial [OS=Homo sapiens]	0	99.807	65	12	195	12	213	23.3	9.96	626.09	12	other metabolic processes;transport	plasma membrane;other membranes;mitochondrion	transporter activity	Pf00213	539	ENSG00000241837	ATP5PO	B2R4E2; hsa:539; P48047; Q5U042; Q6IBI2	Electron transport chain: OXPHOS system in mitochondria; 7q11.23 copy number variation syndrome; Oxidative phosphorylation	Mitochondrial protein degradation; Cristae formation; Formation of ATP by chemiosmotic coupling	6	0	1.067	0.498503	0.903802	88.2	110.9	89.1	37.2	80.31	High	High	High	High	High	High	1
FALSE	High	Master Protein	P10515	Dihydrolipoyllysine-residue acetyltransferase component of pyruvate dehydrogenase complex, mitochondrial [OS=Homo sapiens]	0	118.272	32	16	194	16	647	69	7.84	531.96	16	other metabolic processes	mitochondrion;other cell component	other molecular function	Pf00198, Pf00364, Pf02817	1737	ENSG00000150768	DLAT	hsa:1737; P10515; Q16783; Q53EP3	TCA cycle and deficiency of pyruvate dehydrogenase complex (PDHc); Neuroinflammation and glutamatergic signaling; Glycolysis and gluconeogenesis; Metabolic Epileptic Disorders	Glyoxylate metabolism and glycine degradation; Regulation of pyruvate dehydrogenase (PDH) complex; Signaling by Retinoic Acid	8	0	0.657	0.306607	0.798352	76.39	79.8	120.2	65.76	24.31	High	High	High	High	High	High	1
FALSE	High	Master Protein	P68104	Elongation factor 1-alpha 1 [OS=Homo sapiens]	0	117.25	58	16	194	10	462	50.1	9.01	593.66	16	protein metabolism;other metabolic processes;other biological processes	non-structural extracellular;plasma membrane;other membranes;cytosol;cytoskeleton;translational apparatus;nucleus;other cytoplasmic organelle;other cell component	nucleic acid binding activity;other molecular function	Pf00009, Pf03143, Pf03144	1915	ENSG00000156508	EEF1A1	hsa:1915; P04719; P04720; P68104; Q6IQ15	Translation factors; Fragile X syndrome; 2q37 copy number variation syndrome	Neutrophil degranulation; Chaperone Mediated Autophagy; Protein methylation; Peptide chain elongation; HSF1 activation; SARS-CoV-1 modulates host translation machinery	10	6	0.654	0.297327	0.791031	77.38	107.5	92.5	10.88	43.01	High	High	High	High	High	High	1
TRUE	High	Master Protein	P01876	Immunoglobulin heavy constant alpha 1 [OS=Homo sapiens]	0	126.313	56	12	194	9	353	37.6	6.51	574.2	12											0	0	2.029	0.00334889	0.0510872	117.53	149.3	50.7	81.95	109.87	High	High	High	High	High	High	1
FALSE	High	Master Protein	P21912	Succinate dehydrogenase [ubiquinone] iron-sulfur subunit, mitochondrial [OS=Homo sapiens]	0	109.355	58	15	193	15	280	31.6	8.76	495.61	15	other metabolic processes	plasma membrane;other membranes;mitochondrion;nucleus	other molecular function	Pf13085, Pf13534	6390	ENSG00000117118	SDHB	B2R545; hsa:6390; P21912; Q0QEY7; Q9NQ12	Electron transport chain: OXPHOS system in mitochondria; Metabolic reprogramming in colon cancer; Nonalcoholic fatty liver disease; Mitochondrial complex II assembly; TCA cycle (aka Krebs or citric acid cycle)	Respiratory electron transport; Citric acid cycle (TCA cycle)	7	0	1.034	0.569905	0.928581	75.31	109.8	90.2	27.16	56.3	High	High	High	High	High	High	1
FALSE	High	Master Protein	Q02952	A-kinase anchor protein 12 [OS=Homo sapiens]	0	278.313	43	50	193	50	1782	191.4	4.41	567.09	50	signal transduction;other biological processes	plasma membrane;other membranes;cytosol;cytoskeleton;other cell component	other molecular function	Pf03832, Pf10522	9590	ENSG00000131016	AKAP12	hsa:9590; O00310; O00498; Q02952; Q4LE68; Q5SZ80; Q5TGN1; Q68D82; Q99970	G protein signaling pathways	RHOD GTPase cycle; RHOF GTPase cycle	3	0	0.744	0.5678	0.928581	69.94	83.3	116.7	20.25	38.77	High	High	High	High	High	High	1
FALSE	High	Master Protein	P22105	Tenascin-X [OS=Homo sapiens]	0	213.852	23	53	192	53	4244	458.1	5.17	435.73	53	cell adhesion;cell organization and biogenesis;other metabolic processes;developmental processes;other biological processes	extracellular matrix;other cell component	signal transduction activity or receptor binding;extracellular structural activity;other molecular function	Pf00041, Pf00147, Pf07974, Pf18720	7148	ENSG00000168477; ENSG00000229353; ENSG00000236236	TNXB	hsa:7148; P22105; P78530; P78531; Q08424; Q08AM0; Q08AM1; Q59GU7; Q5SQD3; Q5ST74; Q7L8Q4; Q8N4R1; Q9NPK9; Q9UC10; Q9UC11; Q9UC12; Q9UC13; Q9UMG7	miRNA targets in ECM and membrane receptors; Focal adhesion; VEGFA-VEGFR2 signaling; Focal adhesion: PI3K-Akt-mTOR-signaling pathway; PI3K-Akt signaling pathway	ECM proteoglycans	6	0	0.879	0.998114	0.999898	56.17	80.6	119.4	39.67	26.04	High	High	High	High	High	High	1
FALSE	High	Master Protein	P40925	Malate dehydrogenase, cytoplasmic [OS=Homo sapiens]	0	93.332	46	13	192	13	334	36.4	7.36	535.63	13	other metabolic processes	cytosol;cytoskeleton;other cell component	other molecular function	Pf00056, Pf02866	4190	ENSG00000014641	MDH1	B2R5V5; B4DUN2; B7Z3I7; F5H098; hsa:4190; P40925; Q6I9V0	Sterol regulatory element-binding proteins (SREBP) signaling; TCA cycle and deficiency of pyruvate dehydrogenase complex (PDHc); Amino acid metabolism; Clear cell renal cell carcinoma pathways; NAD metabolism in oncogene-induced senescence and mitochondrial dysfunction-associated senescence; TCA cycle in senescence; Glycolysis and gluconeogenesis; Metabolic Epileptic Disorders; HDAC6 interactions…	Gluconeogenesis	10	0	0.638	0.259489	0.75962	59.44	86.1	113.9	45.5	34.36	High	High	High	High	High	High	1
FALSE	High	Master Protein	P0DOX7	Immunoglobulin kappa light chain [OS=Homo sapiens]	0	72.372	54	7	192	2	214	23.4	7.17	593.54	7	other biological processes	non-structural extracellular;plasma membrane;other membranes;other cell component		Pf07654, Pf07686							0	5	1.607	0.0345112	0.270232	92.97	122.4	77.6	26.96	73.8	High	High	High	High	High	High	1
TRUE	High	Master Protein	P15121	Aldo-keto reductase family 1 member B1 [OS=Homo sapiens]	0	121.962	63	14	191	13	316	35.8	6.98	568.6	14	other metabolic processes;stress response;developmental processes;other biological processes	non-structural extracellular;cytosol;nucleus	other molecular function	Pf00248	231	ENSG00000085662	AKR1B1	B2R8N3; hsa:231; P15121; Q5U031; Q6FGA4; Q6ICP2; Q9BS21; Q9UCI9	Eicosanoid metabolism via cyclooxygenases (COX); Disorders of galactose metabolism ; Omega-6-fatty acids in senescence; Polyol pathway; Metapathway biotransformation Phase I and II	Pregnenolone biosynthesis; Fructose biosynthesis	7	2	0.32	0.000388038	0.00816372	62.34	54.5	145.5	33.79	38.51	High	High	High	High	High	High	1
FALSE	High	Master Protein	Q9NY65	Tubulin alpha-8 chain [OS=Homo sapiens]	0	132.124	50	19	190	3	449	50.1	5.06	553.38	19	cell cycle OR cell proliferation;cell organization and biogenesis;other biological processes	cytoskeleton;other cell component	cytoskeletal activity;other molecular function	Pf00091, Pf03953	51807	ENSG00000183785	TUBA8	B2RCX2; B3KPW9; B4DWG3; hsa:51807; Q2M3N4; Q9NY65	Alzheimer's disease and miRNA effects; Pathogenic Escherichia coli infection; Parkin-ubiquitin proteasomal system pathway; Alzheimer's disease	MHC class II antigen presentation; PKR-mediated signaling; Separation of Sister Chromatids; The role of GTSE1 in G2/M progression after G2 checkpoint; Translocation of SLC2A4 (GLUT4) to the plasma membrane; Activation of AMPK downstream of NMDARs; Resolution of Sister Chromatid Cohesion; RHO GTPases Activate Formins; HCMV Early Events; EML4 and NUDC in mitotic spindle formation; Recycling pathway…	32	0	0.967	0.73686	0.962947	76.37	62.1	137.9	94.67	62.49	High	High	High	High	High	High	1
FALSE	High	Master Protein	O60664	Perilipin-3 [OS=Homo sapiens]	0	153.111	75	22	190	22	434	47	5.44	556.02	22	cell organization and biogenesis;stress response;transport;other biological processes	other membranes;cytosol;ER/Golgi;other cytoplasmic organelle;other cell component		Pf03036	10226	ENSG00000105355	PLIN3	A8K4Y9; hsa:10226; K7EQF4; O60664; Q53G77; Q9BS03; Q9UBD7; Q9UP92		Late endosomal microautophagy; Triglyceride catabolism; Retrograde transport at the Trans-Golgi-Network; RHOBTB3 ATPase cycle; Lipophagy; Chaperone Mediated Autophagy	6	0	1.041	0.553561	0.923641	51.16	107.8	92.2	34.37	27.2	High	High	High	High	High	High	1
FALSE	High	Master Protein	P35232	Prohibitin 1 [OS=Homo sapiens]	0	117.714	81	18	190	18	272	29.8	5.76	515.55	18	cell organization and biogenesis;DNA metabolism;other metabolic processes;stress response;signal transduction;other biological processes	plasma membrane;other membranes;mitochondrion;nucleus;other cytoplasmic organelle;other cell component	signal transduction activity or receptor binding;other molecular function	Pf01145	5245	ENSG00000167085	PHB1	B4DY47; hsa:5245; P35232; Q4VBQ0		RAF activation; Signaling by moderate kinase activity BRAF mutants; Paradoxical activation of RAF signaling by kinase inactive BRAF; Signaling downstream of RAS mutants; Processing of SMDT1	5	0	1.215	0.2563	0.755482	72.37	130.4	69.6	42.47	52.87	High	High	High	High	High	High	1
FALSE	High	Master Protein	P47985	Cytochrome b-c1 complex subunit Rieske, mitochondrial [OS=Homo sapiens]	0	108.876	69	15	189	15	274	29.6	8.32	574.89	15	cell organization and biogenesis;other metabolic processes;transport	other membranes;mitochondrion	transporter activity;other molecular function	Pf00355, Pf02921, Pf09165	7386	ENSG00000169021	UQCRFS1	A8K519; hsa:7386; P47985; Q6NVX5; Q9UPH2	Electron transport chain: OXPHOS system in mitochondria; Nonalcoholic fatty liver disease; Mitochondrial complex III assembly; Iron metabolism disorders; Arsenic metabolism and reactive oxygen species generation	Respiratory electron transport	6	0	0.856	0.922755	0.994751	88.07	95.7	104.3	42.7	43.02	High	High	High	High	High	High	1	Acetyl [N-Term]
FALSE	High	Master Protein	Q16082	Heat shock protein beta-2 [OS=Homo sapiens]	0	83.53	76	8	189	8	182	20.2	5.17	592.3	8	protein metabolism;other metabolic processes;stress response;other biological processes	cytosol;nucleus;other cell component	enzyme regulator activity;other molecular function	Pf00011, Pf00525	3316	ENSG00000170276	HSPB2	hsa:3316; Q16082; Q6I9U7	IL-1 signaling pathway		1	0	0.61	0.198828	0.685667	71.58	98	102	51.63	36.95	High	High	High	High	High	High	1
FALSE	High	Master Protein	Q0ZGT2	Nexilin [OS=Homo sapiens]	0	160.897	47	28	188	28	675	80.6	5.33	511.11	28	cell adhesion;cell organization and biogenesis;developmental processes;other biological processes	plasma membrane;other membranes;cytoskeleton;other cell component	cytoskeletal activity;other molecular function	Pf07679	91624	ENSG00000162614	NEXN	A0PJ84; B4DPZ7; hsa:91624; Q0D2H2; Q0ZGT2; Q14CC2; Q14CC3; Q16081; Q7Z2X0; Q96DL0; Q9Y2V1	VEGFA-VEGFR2 signaling		1	0	0.875	0.985372	0.999898	80.26	91	109	63.47	45.94	High	High	High	High	High	High	1
FALSE	High	Master Protein	P49773	Adenosine 5'-monophosphoramidase HINT1 [OS=Homo sapiens]	0	182.504	79	10	188	10	126	13.8	6.95	686.38	10	protein metabolism;other metabolic processes;signal transduction;other biological processes	plasma membrane;other membranes;cytosol;cytoskeleton;nucleus;other cell component	other molecular function	Pf01230	3094	ENSG00000169567	HINT1	hsa:3094; P49773; Q9H5W8			0	0	0.738	0.539167	0.918359	73.32	94.4	105.6	23.15	52.58	High	High	High	High	High	High	1
FALSE	High	Master Protein	Q8WX93	Palladin [OS=Homo sapiens]	0	160.094	34	30	187	29	1383	150.5	7.09	516.74	30	cell adhesion;cell organization and biogenesis;developmental processes;other biological processes	plasma membrane;other membranes;cytosol;cytoskeleton;mitochondrion;nucleus;other cell component	cytoskeletal activity;other molecular function	Pf07679	23022	ENSG00000129116	PALLD	B3KTG2; B5MD56; B7ZMM5; hsa:23022; Q7L3E0; Q7Z3W0; Q86WE8; Q8N1M2; Q8WX93; Q9UGA0; Q9UQF5; Q9Y2J6; Q9Y3E9			0	1	1.075	0.480674	0.900779	71.14	142.1	57.9	48.32	45.03	High	High	High	High	High	High	1
FALSE	High	Master Protein	Q14624	Inter-alpha-trypsin inhibitor heavy chain H4 [OS=Homo sapiens]	0	169.214	38	27	186	27	930	103.3	6.98	500.35	27	other metabolic processes;stress response;other biological processes	non-structural extracellular;plasma membrane;other membranes;other cell component	enzyme regulator activity	Pf00092, Pf06668, Pf08487	3700	ENSG00000055955	ITIH4	B7Z545; E9PGN5; hsa:3700; Q14624; Q15135; Q9P190; Q9UQ54	Network map of SARS-CoV-2 signaling pathway; HDAC6 interactions in the central nervous system	Platelet degranulation	3	0	0.766	0.627759	0.939257	64.16	87.4	112.6	22.1	55.04	High	High	High	High	High	High	1
FALSE	High	Master Protein	P63104	14-3-3 protein zeta/delta [OS=Homo sapiens]	0	114.68	63	19	185	15	245	27.7	4.79	469.69	19	cell organization and biogenesis;protein metabolism;other metabolic processes;stress response;signal transduction;other biological processes	cytosol;nucleus;other cell component	other molecular function	Pf00244	7534	ENSG00000164924	YWHAZ	A8K1N0; B7Z465; hsa:7534; P29213; P29312; P63104; Q32P43; Q5XJ08; Q6GPI2; Q6IN74; Q6NUR9; Q6P3U9; Q86V33	Cell cycle; Prolactin signaling pathway; Pathogenic Escherichia coli infection; Myometrial relaxation and contraction pathways; Hepatitis B infection; GDNF signaling; Calcium regulation in cardiac cells; Sudden infant death syndrome (SIDS) susceptibility pathways	Translocation of SLC2A4 (GLUT4) to the plasma membrane; Regulation of localization of FOXO transcription factors; Deactivation of the beta-catenin transactivating complex; TP53 Regulates Metabolic Genes; SARS-CoV-2 targets host intracellular signalling and regulatory pathways; Activation of BAD and translocation to mitochondria ; Negative regulation of NOTCH4 signaling; Interleukin-3, Interleukin…	23	5	0.629	0.239792	0.733647	67.34	82.1	117.9	38.9	22.44	High	High	High	High	High	High	1	Acetyl [N-Term]
FALSE	High	Master Protein	P07237	Protein disulfide-isomerase [OS=Homo sapiens]	0	110.931	52	24	184	24	508	57.1	4.87	432.17	24	protein metabolism;other metabolic processes;stress response;transport;signal transduction;other biological processes	non-structural extracellular;plasma membrane;other membranes;cytosol;cytoskeleton;ER/Golgi;other cell component	signal transduction activity or receptor binding;cytoskeletal activity;other molecular function	Pf00085, Pf13848	5034	ENSG00000185624	P4HB	B2RDQ2; hsa:5034; P07237; P30037; P32079; Q15205; Q6LDE5	VEGFA-VEGFR2 signaling; Type I collagen synthesis in the context of osteogenesis imperfecta	Hedgehog ligand biogenesis; Collagen biosynthesis and modifying enzymes; Detoxification of Reactive Oxygen Species; Regulation of Insulin-like Growth Factor (IGF) transport and uptake by Insulin-like Growth Factor Binding Proteins (IGFBPs); Post-translational protein phosphorylation; Insulin processing; Interleukin-12 signaling; Interleukin-23 signaling; Chylomicron assembly; VLDL assembly; LDL r…	13	0	0.713	0.462395	0.898926	64.79	75.8	124.2	62.64	10.38	High	High	High	High	High	High	1
FALSE	High	Master Protein	P54819	Adenylate kinase 2, mitochondrial [OS=Homo sapiens]	0	131.431	65	17	184	17	239	26.5	7.81	538.98	17	other metabolic processes	cytoskeleton;mitochondrion;other cell component	kinase activity;other molecular function	Pf00406, Pf05191	204	ENSG00000004455	AK2	A8K6L1; B4DHH7; B4DL64; hsa:204; P54819; Q16856; Q5EB54; Q5TIF7; Q8TCY2; Q8TCY3		Interconversion of nucleotide di- and triphosphates	1	0	1.108	0.418044	0.879505	69.1	121.3	78.7	33.59	62.13	High	High	High	High	High	High	1
FALSE	High	Master Protein	Q9NQC3	Reticulon-4 [OS=Homo sapiens]	0	173.087	47	33	183	33	1192	129.9	4.5	516.08	33	cell adhesion;cell organization and biogenesis;stress response;developmental processes;other biological processes	plasma membrane;other membranes;ER/Golgi;nucleus;other cell component	other molecular function	Pf02453	57142	ENSG00000115310	RTN4	O94962; Q7L7Q5; Q7L7Q6; Q7L7Q8; Q8IUA4; Q96B16; Q9BXG5; Q9H212; Q9H3I3; Q9NQC3; Q9UQ42; Q9Y293; Q9Y2Y7; Q9Y5U6	Alzheimer's disease and miRNA effects; Spinal cord injury; 22q11.2 copy number variation syndrome; Alzheimer's disease; Neurogenesis regulation in the olfactory epithelium; 13q12.12 copy number variation	Axonal growth inhibition (RHOA activation)	7	0	0.626	0.232485	0.721382	69.47	75.4	124.6	52.98	4.27	High	High	High	High	High	High	1	Acetyl [N-Term]
FALSE	High	Master Protein	Q86TX2	Acyl-coenzyme A thioesterase 1 [OS=Homo sapiens]	0	116.415	58	20	182	20	421	46.2	7.34	477.23	20	other metabolic processes	cytosol	other molecular function	Pf04775, Pf08840	641371	ENSG00000184227	ACOT1	A1L173; hsa:641371; Q3I5F9; Q86TX2		Mitochondrial Fatty Acid Beta-Oxidation	1	0	0.81	0.77339	0.97229	61.73	94.3	105.7	67.42	25.15	High	High	High	High	High	High	1
FALSE	High	Master Protein	P11047	Laminin subunit gamma-1 [OS=Homo sapiens]	0	189.805	31	38	182	38	1609	177.5	5.12	407.59	38	cell adhesion;cell organization and biogenesis;other biological processes	non-structural extracellular;extracellular matrix;ER/Golgi;other cell component	extracellular structural activity	Pf00052, Pf00053, Pf00055	3915	ENSG00000135862	LAMC1	hsa:3915; P11047; Q5VYE7	Alpha 6 beta 4 signaling pathway; Complement system; Endoderm differentiation; miRNA targets in ECM and membrane receptors; Focal adhesion; Focal adhesion: PI3K-Akt-mTOR-signaling pathway; PI3K-Akt signaling pathway; Inflammatory response pathway; Small cell lung cancer; Pleural mesothelioma; Primary ovarian insufficiency	Degradation of the extracellular matrix; Regulation of Insulin-like Growth Factor (IGF) transport and uptake by Insulin-like Growth Factor Binding Proteins (IGFBPs); Post-translational protein phosphorylation; ECM proteoglycans; Non-integrin membrane-ECM interactions; Laminin interactions; L1CAM interactions; MET activates PTK2 signaling; EGR2 and SOX10-mediated initiation of Schwann cell myelina…	20	0	0.713	0.505598	0.90517	71.34	70.4	129.6	73.68	14.23	High	High	High	High	High	High	1
FALSE	High	Master Protein	P22695	Cytochrome b-c1 complex subunit 2, mitochondrial [OS=Homo sapiens]	0	127.273	51	16	182	16	453	48.4	8.63	514.47	16	protein metabolism;other metabolic processes	other membranes;mitochondrion;nucleus	other molecular function	Pf00675, Pf05193	7385	ENSG00000140740	UQCRC2	B3KSN4; hsa:7385; P22695; Q9BQ05	Electron transport chain: OXPHOS system in mitochondria; Nonalcoholic fatty liver disease; Mitochondrial complex III assembly	Mitochondrial protein degradation; Respiratory electron transport	5	0	0.694	0.405692	0.874983	61.18	84	116	40.35	19.39	High	High	High	High	High	High	1
FALSE	High	Master Protein	P13489	Ribonuclease inhibitor [OS=Homo sapiens]	0	132.423	65	20	182	20	461	49.9	4.82	543.72	20	RNA metabolism OR transcription;other metabolic processes;other biological processes	non-structural extracellular;plasma membrane;other membranes;cytosol;nucleus;other cell component	enzyme regulator activity	Pf13516, Pf18779	6050	ENSG00000023191; ENSG00000276230	RNH1	hsa:6050; P13489; Q8IZK8; Q96FD7; Q9BQ80; Q9UDK6			0	0	0.516	0.0616397	0.38129	66.27	68.5	131.5	46	35.47	High	High	High	High	High	High	1
FALSE	High	Master Protein	Q7Z7G0	Target of Nesh-SH3 [OS=Homo sapiens]	0	117.692	25	21	181	21	1068	117.8	9.42	476.6	21	cell organization and biogenesis;other biological processes			Pf00041, Pf21731	25890	ENSG00000154175	ABI3BP	B3KSL4; hsa:25890; Q6ZW20; Q6ZW22; Q7Z7G0; Q9C082; Q9UFI6			0	0	0.516	0.0610442	0.379906	57.97	74.9	125.1	26.92	37.47	High	High	High	High	High	High	1
FALSE	High	Master Protein	P31937	3-hydroxyisobutyrate dehydrogenase, mitochondrial [OS=Homo sapiens]	0	104.436	42	10	180	10	336	35.3	8.13	563.71	10	other metabolic processes	mitochondrion	other molecular function	Pf03446, Pf14833	11112	ENSG00000106049	HIBADH	hsa:11112; P31937; Q546Z2; Q9UDN3	Amino acid metabolism	Branched-chain amino acid catabolism	2	0	0.823	0.816138	0.975645	66.39	114	86	34.26	37.24	High	High	High	High	High	High	1
FALSE	High	Master Protein	P04264	Keratin, type II cytoskeletal 1 [OS=Homo sapiens]	0	219.463	57	41	180	37	644	66	8.12	494.23	41	cell organization and biogenesis;protein metabolism;other metabolic processes;stress response;other biological processes	non-structural extracellular;plasma membrane;other membranes;cytosol;cytoskeleton;other cell component	bone, tooth or skin structural activity;other molecular function	Pf00038, Pf16208, Pf16210	3848	ENSG00000167768	KRT1	B2RA01; hsa:3848; P04264; P85925; P86104; Q14720; Q6GSJ0; Q9H298	Corticotropin-releasing hormone signaling pathway	Formation of the cornified envelope; Neutrophil degranulation	4	4	0.77	0.642205	0.941335	95.02	139.5	60.5	56.36	97.54	High	High	High	High	High	High	1
FALSE	High	Master Protein	Q99714	3-hydroxyacyl-CoA dehydrogenase type-2 [OS=Homo sapiens]	0	126.411	77	14	179	14	261	26.9	7.78	527.61	14	cell organization and biogenesis;RNA metabolism OR transcription;other metabolic processes	plasma membrane;other membranes;mitochondrion;other cell component	nucleic acid binding activity;other molecular function	Pf00106	3028	ENSG00000072506	HSD17B10	hsa:3028; Q5H927; Q6IBS9; Q8TCV9; Q96HD5; Q99714	Alzheimer's disease and miRNA effects; Valproic acid pathway; Alzheimer's disease	Mitochondrial protein degradation; Branched-chain amino acid catabolism; tRNA processing in the mitochondrion; tRNA modification in the mitochondrion; rRNA processing in the mitochondrion	8	0	1.418	0.0936189	0.489709	56.69	124.8	75.2	41.59	50.05	High	High	High	High	High	High	1
FALSE	High	Master Protein	P30837	Aldehyde dehydrogenase X, mitochondrial [OS=Homo sapiens]	0	135.457	57	24	177	21	517	57.2	6.99	491.89	24	other metabolic processes	cytosol;mitochondrion;nucleus	other molecular function	Pf00171	219	ENSG00000137124	ALDH1B1	B2R8F0; hsa:219; P30837; Q8WX76; Q9BV45		Mitochondrial protein degradation; Ethanol oxidation	2	1	0.819	0.801018	0.973515	69.5	90.2	109.8	41.25	57.08	High	High	High	High	High	High	1
FALSE	High	Master Protein	P23327	Sarcoplasmic reticulum histidine-rich calcium-binding protein [OS=Homo sapiens]	0	271.116	52	22	177	22	699	80.2	4.72	525.32	22	signal transduction;other biological processes	other membranes;cytosol;cytoskeleton;ER/Golgi	other molecular function	Pf10529	3270	ENSG00000130528	HRC	hsa:3270; P23327; Q504Y6		Regulation of Insulin-like Growth Factor (IGF) transport and uptake by Insulin-like Growth Factor Binding Proteins (IGFBPs); Post-translational protein phosphorylation	2	0	0.682	0.372468	0.852469	75.32	84.9	115.1	42.16	7.75	High	High	High	High	High	High	1
FALSE	High	Master Protein	P61978	Heterogeneous nuclear ribonucleoprotein K [OS=Homo sapiens]	0	120.459	48	20	175	20	463	50.9	5.54	448.14	20	RNA metabolism OR transcription;other metabolic processes;signal transduction;other biological processes	cytoskeleton;nucleus;other cell component	nucleic acid binding activity;other molecular function	Pf00013, Pf08067	3190	ENSG00000165119	HNRNPK	hsa:3190; P61978; Q07244; Q15671; Q59F98; Q5T6W4; Q60577; Q6IBN1; Q922Y7; Q96J62	mRNA processing; lncRNA in canonical Wnt signaling and colorectal cancer	mRNA Splicing - Major Pathway; HCMV Late Events; SUMOylation of RNA binding proteins; Processing of Capped Intron-Containing Pre-mRNA	6	0	1.02	0.603072	0.93383	58.87	97.8	102.2	39.73	41.18	High	High	High	High	High	High	1	Acetyl [N-Term]
FALSE	High	Master Protein	Q9H223	EH domain-containing protein 4 [OS=Homo sapiens]	0	127.747	47	22	174	18	541	61.1	6.76	486.1	22	cell organization and biogenesis;transport;other biological processes	plasma membrane;other membranes;ER/Golgi;nucleus;other cytoplasmic organelle;other cell component	nucleic acid binding activity;other molecular function	Pf00350, Pf12763, Pf16880, Pf18150	30844	ENSG00000103966	EHD4	hsa:30844; Q9H223; Q9HAR1; Q9NZN2			0	4	0.794	0.721021	0.960029	63.12	114.6	85.4	52.01	40.7	High	High	High	High	High	High	1	Acetyl [N-Term]
FALSE	High	Master Protein	Q04760	Lactoylglutathione lyase [OS=Homo sapiens]	0	81.667	66	11	173	11	184	20.8	5.31	462.69	11	other metabolic processes;other biological processes	plasma membrane;other membranes;cytosol;nucleus;other cell component	other molecular function	Pf00903	2739	ENSG00000124767	GLO1	B2R6P7; B4DDV0; hsa:2739; P78375; Q04760; Q59EL0; Q5TZW3; Q96FC0; Q96J41		Pyruvate metabolism	1	0	0.956	0.770652	0.972098	53.18	98.5	101.5	35.62	35.08	High	High	High	High	High	High	1
FALSE	High	Master Protein	O96000	NADH dehydrogenase [ubiquinone] 1 beta subcomplex subunit 10 [OS=Homo sapiens]	0	92.89	63	14	172	14	172	20.8	8.48	424.29	14	cell organization and biogenesis;other metabolic processes;transport	other membranes;mitochondrion	transporter activity	Pf10249	4716	ENSG00000140990; ENSG00000291930	NDUFB10	hsa:4716; O96000; Q96II6	Electron transport chain: OXPHOS system in mitochondria; Nonalcoholic fatty liver disease; Modulators of TCR signaling and T cell activation; Oxidative phosphorylation	Complex I biogenesis	6	0	1.213	0.25911	0.759091	92.75	120.9	79.1	25.47	90.85	High	High	High	High	High	High	1
FALSE	High	Master Protein	Q9GZM7	Tubulointerstitial nephritis antigen-like [OS=Homo sapiens]	0	166.028	60	16	172	16	467	52.4	6.99	524.49	16	transport	non-structural extracellular;other cell component	extracellular structural activity;other molecular function	Pf00112	64129	ENSG00000142910	TINAGL1	A8K9Q5; B4DPK6; D3DPN8; hsa:64129; Q8TEJ9; Q8WZ23; Q96GZ4; Q96JW3; Q9GZM7			0	0	1.32	0.154192	0.641726	94.96	127.3	72.7	81.37	50.67	High	High	High	High	High	High	1
FALSE	High	Master Protein	Q07955	Serine/arginine-rich splicing factor 1 [OS=Homo sapiens]	0	75.628	46	15	170	15	248	27.7	10.36	398.23	15	cell organization and biogenesis;RNA metabolism OR transcription;other metabolic processes;transport;developmental processes;other biological processes	nucleus;other cell component	nucleic acid binding activity;other molecular function	Pf00076	6426	ENSG00000136450	SRSF1	B2R6Z7; D3DTZ3; hsa:6426; Q07955; Q13809	mRNA processing	Transport of Mature mRNA derived from an Intron-Containing Transcript; mRNA 3'-end processing; RNA Polymerase II Transcription Termination; mRNA Splicing - Major Pathway; mRNA Splicing - Minor Pathway	7	0	0.873	0.977743	0.999898	72	92.3	107.7	54.28	42.86	High	High	High	High	High	High	1
FALSE	High	Master Protein	P28289	Tropomodulin-1 [OS=Homo sapiens]	0	126.21	63	19	170	18	359	40.5	5.1	493.24	19	cell organization and biogenesis;developmental processes;other biological processes	other membranes;cytosol;cytoskeleton	cytoskeletal activity	Pf03250	7111	ENSG00000136842	TMOD1	B2RB77; hsa:7111; P28289; Q5T7W3; Q9BUF1	Striated muscle contraction pathway; VEGFA-VEGFR2 signaling	Striated Muscle Contraction	3	1	1.269	0.197983	0.685297	71.44	111.4	88.6	57.96	30.39	High	High	High	High	High	High	1
FALSE	High	Master Protein	Q13423	NAD(P) transhydrogenase, mitochondrial [OS=Homo sapiens]	0	149.922	29	29	170	29	1086	113.8	8.09	477.04	29	other metabolic processes;transport;other biological processes	other membranes;mitochondrion	transporter activity;other molecular function	Pf01262, Pf02233, Pf05222, Pf12769	23530	ENSG00000112992	NNT	hsa:23530; Q13423; Q16796; Q2TB60; Q8N3V4		Citric acid cycle (TCA cycle)	1	0	0.531	0.0761424	0.437397	67.33	84.9	115.1	51.29	36.11	High	High	High	High	High	High	1
FALSE	High	Master Protein	Q16891	MICOS complex subunit MIC60 [OS=Homo sapiens]	0	150.574	43	26	169	26	758	83.6	6.48	453.75	26	cell organization and biogenesis;other biological processes	other membranes;mitochondrion		Pf09731	10989	ENSG00000132305	IMMT	B1H0U5; B2R5N6; hsa:10989; Q14539; Q15092; Q16891; Q68D41; Q69HW5; Q6IBL0; Q7Z3X1; Q8TAJ5; Q9P0V2		Cristae formation	1	0	1.011	0.624224	0.937983	56.92	113.7	86.3	46.85	21.96	High	High	High	High	High	High	1
FALSE	High	Master Protein	P50995	Annexin A11 [OS=Homo sapiens]	0	104.769	40	18	168	18	505	54.4	7.65	396.06	18	cell cycle OR cell proliferation;transport;other biological processes	cytosol;cytoskeleton;nucleus;other cytoplasmic organelle;other cell component	other molecular function	Pf00191	311	ENSG00000122359	ANXA11	B4DVE7; hsa:311; P50995			0	0	1.016	0.613897	0.937126	51.49	105.1	94.9	29.23	25.06	High	High	High	High	High	High	1
FALSE	High	Master Protein	P26038	Moesin [OS=Homo sapiens]	0	137.167	48	28	168	20	577	67.8	6.4	442.15	28	cell adhesion;cell cycle OR cell proliferation;cell organization and biogenesis;other biological processes	plasma membrane;other membranes;cytosol;cytoskeleton;other cell component	signal transduction activity or receptor binding;cytoskeletal activity;nucleic acid binding activity;other molecular function	Pf00373, Pf00769, Pf09379, Pf09380, Pf20492	4478	ENSG00000147065	MSN	hsa:4478; P26038	Glial cell differentiation; AGE/RAGE pathway; Measles virus infection; 16p11.2 proximal deletion syndrome; Regulation of actin cytoskeleton	Gene and protein expression by JAK-STAT signaling after Interleukin-12 stimulation; Recycling pathway of L1; Sensory processing of sound by inner hair cells of the cochlea; Sensory processing of sound by outer hair cells of the cochlea; Signaling by ALK fusions and activated point mutants	10	8	0.63	0.242582	0.735591	51.69	76.6	123.4	32.06	3.27	High	High	High	High	High	High	1
FALSE	High	Master Protein	P62258	14-3-3 protein epsilon [OS=Homo sapiens]	0	101.467	68	19	168	16	255	29.2	4.74	438.64	19	stress response;developmental processes;signal transduction;other biological processes	other membranes;cytosol;mitochondrion;nucleus;other cell component	other molecular function	Pf00244	7531	ENSG00000108953; ENSG00000274474	YWHAE	B3KY71; D3DTH5; hsa:7531; P29360; P42655; P62258; Q4VJB6; Q53XZ5; Q63631; Q7M4R4	Cell cycle; Myometrial relaxation and contraction pathways; VEGFA-VEGFR2 signaling; Calcium regulation in cardiac cells; 17p13.3 (YWHAE) copy number variation; Sudden infant death syndrome (SIDS) susceptibility pathways	TP53 Regulates Metabolic Genes; Translocation of SLC2A4 (GLUT4) to the plasma membrane; Chk1/Chk2(Cds1) mediated inactivation of Cyclin B:Cdk1 complex; RHO GTPases activate PKNs; SARS-CoV-1 targets host intracellular signalling and regulatory pathways; SARS-CoV-2 targets host intracellular signalling and regulatory pathways; Activation of BAD and translocation to mitochondria ; Deregulated CDK5 t…	26	0	0.511	0.0568498	0.366866	64.67	74.1	125.9	43.22	30.33	High	High	High	High	High	High	1	Acetyl [N-Term]
FALSE	High	Master Protein	Q9UMS6	Synaptopodin-2 [OS=Homo sapiens]	0	143.899	35	26	167	26	1093	117.4	8.57	424.38	26	other biological processes	cytosol;cytoskeleton;nucleus;other cell component	cytoskeletal activity;other molecular function	Pf00595	171024	ENSG00000172403	SYNPO2	B2RWP6; B2Y8J9; C6H0M7; hsa:171024; Q9UK89; Q9UMS6; S5XAM4			0	0	1.025	0.591132	0.929836	49.86	107.2	92.8	5.66	38.08	High	High	High	High	High	High	1
FALSE	High	Master Protein	Q9NZN4	EH domain-containing protein 2 [OS=Homo sapiens]	0	126.915	53	21	167	19	543	61.1	6.46	451.29	21	cell organization and biogenesis;transport;other biological processes	plasma membrane;other membranes;cytosol;cytoskeleton;nucleus;other cytoplasmic organelle;other cell component	nucleic acid binding activity;other molecular function	Pf00350, Pf12763, Pf16880, Pf18150	30846	ENSG00000024422	EHD2	B2RDH9; B4DNU6; hsa:30846; Q96CB6; Q9NZN4	Insulin signaling	Factors involved in megakaryocyte development and platelet production	2	1	1.051	0.531484	0.917517	84	122	78	17.56	27.85	High	High	High	High	High	High	1	Acetyl [N-Term]
FALSE	High	Master Protein	O95831	Apoptosis-inducing factor 1, mitochondrial [OS=Homo sapiens]	0	148.66	44	20	166	20	613	66.9	8.95	465.29	20	cell organization and biogenesis;stress response;transport;developmental processes;signal transduction;other biological processes	other membranes;cytosol;mitochondrion;nucleus;other cell component	nucleic acid binding activity;other molecular function	Pf00070, Pf14721	9131	ENSG00000156709	AIFM1	A4QPB4; B1ALN1; B2RB08; D3DTE9; E9PRR0; O95831; Q1L6K4; Q1L6K6; Q2QKE4; Q5JUZ7; Q6I9X6; Q9Y3I3; Q9Y3I4	Apoptosis modulation and signaling; Nanomaterial induced apoptosis; Apoptosis modulation by HSP70		3	0	0.727	0.503787	0.90517	52.36	88.8	111.2	45.16	11.59	High	High	High	High	High	High	1
FALSE	High	Master Protein	Q6YN16	Hydroxysteroid dehydrogenase-like protein 2 [OS=Homo sapiens]	0	119.102	61	20	166	20	418	45.4	7.99	467.11	20		mitochondrion;other cytoplasmic organelle	other molecular function	Pf00106, Pf02036	84263	ENSG00000119471	HSDL2	A8K1L4; A8K8X1; A8MSV3; hsa:84263; Q658M8; Q6YN16; Q9BT58			0	0	1.077	0.476471	0.900712	65.91	109.6	90.4	55.3	30.39	High	High	High	High	High	High	1
FALSE	High	Master Protein	Q13228	Methanethiol oxidase [OS=Homo sapiens]	0	139.075	67	26	166	26	472	52.4	6.37	445.54	26	transport	other membranes;cytosol;nucleus	other molecular function	Pf05694	8991	ENSG00000143416	SELENBP1	A6NML9; A6PVW9; B2RDR3; B4DKP6; B4E1F3; hsa:8991; Q13228; Q49AQ8; Q96GX7	Selenium metabolism and selenoproteins; IL1 and megakaryocytes in obesity		2	0	0.624	0.227459	0.713171	64.73	65.3	134.7	38.57	38.97	High	High	High	High	High	High	1
FALSE	High	Master Protein	P10909	Clusterin [OS=Homo sapiens]	0	127.762	34	15	166	15	449	52.5	6.27	435.44	15	cell cycle OR cell proliferation;cell organization and biogenesis;protein metabolism;other metabolic processes;stress response;transport;developmental processes;signal transduction;other biological processes	non-structural extracellular;other membranes;cytosol;mitochondrion;ER/Golgi;nucleus;other cell component	signal transduction activity or receptor binding;cytoskeletal activity;other molecular function	Pf01093	1191	ENSG00000120885	CLU	B2R9Q1; B3KSE6; hsa:1191; P10909; P11380; P11381; Q2TU75; Q5HYC1; Q7Z5B9	Dengue-2 interactions with complement and coagulation cascades; Male infertility; Complement system in neuronal development and plasticity; Complement and coagulation cascades	Platelet degranulation ; Regulation of Complement cascade; Antimicrobial peptides; Terminal pathway of complement	8	0	1.326	0.149594	0.631731	86.35	90.3	109.7	71.03	52.23	High	High	High	High	High	High	1
FALSE	High	Master Protein	Q13642	Four and a half LIM domains protein 1 [OS=Homo sapiens]	0	89.494	41	12	165	12	323	36.2	8.97	402.19	12	other biological processes	plasma membrane;other membranes;cytosol;nucleus;other cell component	other molecular function	Pf00412	2273	ENSG00000022267	FHL1	B7Z5T4; B7Z793; hsa:2273; O95212; Q13230; Q13642; Q13645; Q5JXI7; Q5M7Y6; Q6IB30; Q9NZ40; Q9UKZ8; Q9Y630	Notch signaling pathway		1	0	1.088	0.45478	0.898224	34.9	104.2	95.8	19.86	14.4	High	High	High	High	High	High	1
FALSE	High	Master Protein	P61981	14-3-3 protein gamma [OS=Homo sapiens]	0	106.58	69	16	165	10	247	28.3	4.89	398.47	16	stress response;signal transduction;other biological processes	cytosol;other cell component	signal transduction activity or receptor binding;enzyme regulator activity;other molecular function	Pf00244	7532	ENSG00000170027	YWHAG	hsa:7532; O70457; P35214; P61981; Q6FH52; Q9UDP2; Q9UN99	Cell cycle; Prolactin signaling pathway; Myometrial relaxation and contraction pathways; Disruption of postsynaptic signaling by CNV; Calcium regulation in cardiac cells; 7q11.23 distal copy number variation; Sudden infant death syndrome (SIDS) susceptibility pathways	TP53 Regulates Metabolic Genes; Translocation of SLC2A4 (GLUT4) to the plasma membrane; Recruitment of NuMA to mitotic centrosomes; Regulation of PLK1 Activity at G2/M Transition; Loss of Nlp from mitotic centrosomes; Recruitment of mitotic centrosome proteins and complexes; Anchoring of the basal body to the plasma membrane; AURKA Activation by TPX2; Regulation of localization of FOXO transcript…	22	3	0.563	0.116968	0.560539	73.32	80.9	119.1	56.4	19.99	High	High	High	High	High	High	1
FALSE	High	Master Protein	P30038	Delta-1-pyrroline-5-carboxylate dehydrogenase, mitochondrial [OS=Homo sapiens]	0	122.039	51	21	164	21	563	61.7	8.07	467.51	21	other metabolic processes	cytosol;mitochondrion	other molecular function	Pf00171	8659	ENSG00000159423	ALDH4A1	A8K1Q7; B4DGE4; D2D4A3; hsa:8659; P30038; Q16882; Q53HU4; Q5JNV6; Q8IZ38; Q96IF0; Q9UDI6	22q11.2 copy number variation syndrome; p53 transcriptional gene network	Glyoxylate metabolism and glycine degradation; Proline catabolism	4	0	0.847	0.895665	0.994135	57.84	95.5	104.5	34.13	52.96	High	High	High	High	High	High	1
FALSE	High	Master Protein	O43852	Calumenin [OS=Homo sapiens]	0	117.109	70	20	164	20	315	37.1	4.64	402.12	20		non-structural extracellular;other membranes;cytosol;ER/Golgi;other cell component	other molecular function	Pf13202	813	ENSG00000128595	CALU	B3KPG9; D6QS48; D6QS49; D6QS50; D6QS51; D6QS52; D6QS53; D6QS54; D6QS55; D6QS56; D6QS57; D6QS58; D6QS59; F5H1Q9; F5H879; hsa:813; O43852; O60456; Q6FHB9; Q96RL3; Q9NR43	NOTCH1 regulation of endothelial cell calcification; VEGFA-VEGFR2 signaling	Platelet degranulation ; Regulation of Insulin-like Growth Factor (IGF) transport and uptake by Insulin-like Growth Factor Binding Proteins (IGFBPs); Post-translational protein phosphorylation	5	0	0.831	0.842128	0.982358	66.57	97.3	102.7	20.43	15.04	High	High	High	High	High	High	1
FALSE	High	Master Protein	P0DJI8	Serum amyloid A-1 protein [OS=Homo sapiens]	0	64.987	62	8	164	5	122	13.5	6.79	453.13	8											0	3	1.609	0.0339726	0.268671	106.02	111.9	88.1	90.16	80.44	High	High	High	High	High	High	1
FALSE	High	Master Protein	Q07157	Tight junction protein ZO-1 [OS=Homo sapiens]	0	208.325	41	39	162	39	1748	195.3	6.7	441.97	39	cell adhesion;cell organization and biogenesis;other biological processes	plasma membrane;other membranes;cytosol;cytoskeleton;other cell component	other molecular function	Pf00595, Pf00625, Pf00791, Pf07653	7082	ENSG00000104067; ENSG00000277401	TJP1	B4E3K1; hsa:7082; Q07157; Q2NKP3; Q4ZGJ6	Epithelial to mesenchymal transition in colorectal cancer; MFAP5 effect on permeability and motility of endothelial cells via cytoskeleton rearrangement; Gastrin signaling pathway; Disruption of postsynaptic signaling by CNV; 1q21.1 copy number variation syndrome; 15q11q13 copy number variation	RUNX1 regulates expression of components of tight junctions; Signaling by Hippo; Regulation of gap junction activity; SARS-CoV-2 targets PDZ proteins in cell-cell junction; Apoptotic cleavage of cell adhesion proteins	11	0	0.93	0.844384	0.982551	72.61	121.2	78.8	67.91	66.28	High	High	High	High	High	High	1
FALSE	High	Master Protein	P22061	Protein-L-isoaspartate(D-aspartate) O-methyltransferase [OS=Homo sapiens]	0	96.641	82	14	162	14	227	24.6	7.21	492.98	14	protein metabolism;other metabolic processes	cytosol;other cell component	other molecular function	Pf01135	5110	ENSG00000120265	PCMT1	A8K109; hsa:5110; J3KP72; P22061; Q14661; Q16556; Q5VYC1; Q5VYC2; Q93061; Q96II9; Q99625; Q9BQV7; Q9BQV8; Q9NP03	Primary ovarian insufficiency	Protein repair	2	0	1.103	0.426804	0.882891	76.32	108.5	91.5	32.59	55.13	High	High	High	High	High	High	1
FALSE	High	Master Protein	O43181	NADH dehydrogenase [ubiquinone] iron-sulfur protein 4, mitochondrial [OS=Homo sapiens]	0	76.597	48	9	160	9	175	20.1	10.3	466.16	9	cell organization and biogenesis;other metabolic processes;transport;developmental processes;other biological processes	other membranes;mitochondrion	transporter activity	Pf04800	4724	ENSG00000164258	NDUFS4	hsa:4724; O43181; Q9BS69	Electron transport chain: OXPHOS system in mitochondria; Nonalcoholic fatty liver disease; Oxidative phosphorylation	Complex I biogenesis	5	0	0.822	0.811084	0.974118	79.03	117.3	82.7	16.4	73.11	High	High	High	High	High	High	1
FALSE	High	Master Protein	O75390	Citrate synthase, mitochondrial [OS=Homo sapiens]	0	91.215	47	15	160	15	466	51.7	8.32	409.12	15	other metabolic processes	mitochondrion	other molecular function	Pf00285	1431	ENSG00000062485	CS	hsa:1431; O75390; Q71UT9; Q7KZH0; Q96FZ8; Q9BWN8	TCA cycle and deficiency of pyruvate dehydrogenase complex (PDHc); Amino acid metabolism; Fluoroacetic acid toxicity; TCA cycle (aka Krebs or citric acid cycle)	Citric acid cycle (TCA cycle); Mitochondrial protein import; Mitochondrial protein degradation	7	0	0.54	0.0870607	0.466906	75.03	86.8	113.2	17.32	49.75	High	High	High	High	High	High	1
FALSE	High	Master Protein	P55268	Laminin subunit beta-2 [OS=Homo sapiens]	0	185.474	30	36	159	36	1798	195.9	6.52	399.79	36	cell adhesion;cell organization and biogenesis;stress response;developmental processes;other biological processes	non-structural extracellular;extracellular matrix;ER/Golgi;other cell component	signal transduction activity or receptor binding;extracellular structural activity;other molecular function	Pf00053, Pf00055, Pf21199	3913	ENSG00000172037	LAMB2	hsa:3913; P55268; Q16321	Alpha 6 beta 4 signaling pathway; Primary focal segmental glomerulosclerosis (FSGS); miRNA targets in ECM and membrane receptors; Focal adhesion; Focal adhesion: PI3K-Akt-mTOR-signaling pathway; PI3K-Akt signaling pathway; Inflammatory response pathway; Small cell lung cancer; Nephrotic syndrome; Genes controlling nephrogenesis; Pleural mesothelioma	Regulation of Insulin-like Growth Factor (IGF) transport and uptake by Insulin-like Growth Factor Binding Proteins (IGFBPs); Post-translational protein phosphorylation; ECM proteoglycans; Non-integrin membrane-ECM interactions; Laminin interactions; MET activates PTK2 signaling	17	0	0.897	0.937416	0.995934	69.33	95.6	104.4	72.77	27.87	High	High	High	High	High	High	1
FALSE	High	Master Protein	O14639	Actin-binding LIM protein 1 [OS=Homo sapiens]	0	140.741	48	28	158	28	778	87.6	8.59	406.99	28	cell organization and biogenesis;other biological processes	cytoskeleton;other cell component	cytoskeletal activity;other molecular function	Pf00412, Pf02209, Pf16182	3983	ENSG00000099204	ABLIM1	A6NI16; A6NJ06; A8MXA9; B3KVH2; hsa:3983; O14639; Q15039; Q5JVV1; Q5JVV2; Q5T6N2; Q5T6N3; Q5T6N5; Q68CQ9; Q9BUP1	Male infertility	DCC mediated attractive signaling	2	0	1.076	0.479388	0.900712	61.19	101.6	98.4	13.4	31.27	High	High	High	High	High	High	1
TRUE	High	Master Protein	P08758	Annexin A5 [OS=Homo sapiens]	0	83.034	58	15	157	14	320	35.9	5.05	341.38	15	stress response;signal transduction;other biological processes	non-structural extracellular;plasma membrane;other membranes;cytosol;other cell component	enzyme regulator activity;other molecular function	Pf00191	308	ENSG00000164111	ANXA5	D3DNW7; hsa:308; P08758; Q6FHB3; Q6FI16; Q8WV69; Q9UDH9	Apoptosis-related network due to altered Notch3 in ovarian cancer; Interactions between LOXL4 and oxidative stress pathway; Prostaglandin synthesis and regulation	Platelet degranulation	4	1	0.45	0.018569	0.182309	77.91	74.5	125.5	9.84	38.79	High	High	High	High	High	High	1
FALSE	High	Master Protein	P50213	Isocitrate dehydrogenase [NAD] subunit alpha, mitochondrial [OS=Homo sapiens]	0	79.784	42	15	156	15	366	39.6	6.92	406.29	15	other metabolic processes	mitochondrion	other molecular function	Pf00180	3419	ENSG00000166411	IDH3A	D3DW83; hsa:3419; P50213; Q9H3X0	TCA cycle and deficiency of pyruvate dehydrogenase complex (PDHc); Metabolic reprogramming in colon cancer; TCA cycle (aka Krebs or citric acid cycle)	Mitochondrial protein degradation; Citric acid cycle (TCA cycle)	5	0	0.835	0.855613	0.985602	59.44	93.5	106.5	40.74	20.92	High	High	High	High	High	High	1
FALSE	High	Master Protein	P12694	2-oxoisovalerate dehydrogenase subunit alpha, mitochondrial [OS=Homo sapiens]	0	123.674	53	18	156	18	445	50.4	8.27	414.94	18	other metabolic processes	mitochondrion	other molecular function	Pf00676	593	ENSG00000248098	BCKDHA	B4DP47; E7EW46; hsa:593; P12694; Q16034; Q16472	Lipid metabolism pathway	Glyoxylate metabolism and glycine degradation; Branched-chain amino acid catabolism	3	0	1.41	0.0978022	0.504007	68.15	134.7	65.3	42.39	58.1	High	High	High	High	High	High	1
TRUE	High	Master Protein	P14625	Endoplasmin [OS=Homo sapiens]	0	156.431	41	31	156	30	803	92.4	4.84	426.42	31	cell organization and biogenesis;protein metabolism;other metabolic processes;stress response;transport;other biological processes	non-structural extracellular;plasma membrane;other membranes;cytosol;ER/Golgi;other cell component	signal transduction activity or receptor binding;nucleic acid binding activity;other molecular function	Pf00183, Pf13589	7184	ENSG00000166598	HSP90B1	hsa:7184; P14625; Q96A97	Photodynamic therapy-induced unfolded protein response; Focal adhesion: PI3K-Akt-mTOR-signaling pathway; Prion disease pathway; PI3K-Akt signaling pathway; Sudden infant death syndrome (SIDS) susceptibility pathways	Regulation of Insulin-like Growth Factor (IGF) transport and uptake by Insulin-like Growth Factor Binding Proteins (IGFBPs); Post-translational protein phosphorylation; Interleukin-4 and Interleukin-13 signaling; Trafficking and processing of endosomal TLR; Scavenging by Class A Receptors; ATF6 (ATF6-alpha) activates chaperone genes	11	1	0.434	0.0132632	0.145561	69.84	63	137	33.57	32.52	High	High	High	High	High	High	1
FALSE	High	Master Protein	P50502	Hsc70-interacting protein [OS=Homo sapiens]	0	105.315	37	14	155	14	369	41.3	5.27	431.87	14	protein metabolism;other metabolic processes;other biological processes	cytosol;other cell component	other molecular function	Pf17830, Pf18253	6767	ENSG00000100380	ST13	hsa:6767; O14999; P50502; Q2TU77		Regulation of HSF1-mediated heat shock response	1	0	0.892	0.961888	0.997851	62.84	87.5	112.5	49.26	18.35	High	High	High	High	High	High	1
FALSE	High	Master Protein	P68036	Ubiquitin-conjugating enzyme E2 L3 [OS=Homo sapiens]	0	74.42	69	9	154	9	154	17.9	8.51	510.46	9	cell cycle OR cell proliferation;protein metabolism;other metabolic processes;other biological processes	cytosol;nucleus;other cell component	enzyme regulator activity;other molecular function	Pf00179	7332	ENSG00000185651	UBE2L3	B2R4A7; B4DDG1; B4DSZ4; E7EWS7; hsa:7332; P51966; P68036; P70653; Q9HAV1	Parkin-ubiquitin proteasomal system pathway; Parkinson's disease pathway	E3 ubiquitin ligases ubiquitinate target proteins; Synthesis of active ubiquitin: roles of E1 and E2 enzymes; Antigen processing: Ubiquitination & Proteasome degradation; Regulation of necroptotic cell death; Regulation of TNFR1 signaling	7	0	0.774	0.654379	0.943477	45.92	95.5	104.5	23.03	40.2	High	High	High	High	High	High	1
FALSE	High	Master Protein	P0DOY2	Immunoglobulin lambda constant 2 [OS=Homo sapiens]	0	62.168	75	5	154	1	106	11.3	7.24	466.77	5	other biological processes	non-structural extracellular;plasma membrane;other membranes;other cell component	other molecular function	Pf07654		ENSG00000211677	IGLC2	A0A075B6K9; A0M8Q4; P0CG05; P0CG06; P0DOY2; P80423		Initial triggering of complement; Classical antibody-mediated complement activation; Immunoregulatory interactions between a Lymphoid and a non-Lymphoid cell; Cell surface interactions at the vascular wall; FCGR activation; Regulation of actin dynamics for phagocytic cup formation; Role of phospholipids in phagocytosis; Scavenging of heme from plasma; Role of LAT2/NTAL/LAB on calcium mobilization…	19	1	1.48	0.0679887	0.408039	78.21	103.4	96.6	55.6	62.72	High	High	High	High	High	High	1
FALSE	High	Master Protein	P55290	Cadherin-13 [OS=Homo sapiens]	0	114.678	27	18	153	18	713	78.2	4.98	425.23	18	cell adhesion;cell cycle OR cell proliferation;cell organization and biogenesis;developmental processes;signal transduction;other biological processes	non-structural extracellular;plasma membrane;other membranes;other cell component	other molecular function	Pf00028, Pf08758	1012	ENSG00000140945	CDH13	A8W476; A8W477; B7Z590; C9JRI6; hsa:1012; J3KN62; P55290; Q6GTW4; Q8TBX3	Clear cell renal cell carcinoma pathways; Hippo signaling regulation pathways; Hippo-Merlin signaling dysregulation; Pleural mesothelioma	Adherens junctions interactions	5	0	1.095	0.442443	0.89519	84.58	124	76	59.22	29.99	High	High	High	High	High	High	1
FALSE	High	Master Protein	O75380	NADH dehydrogenase [ubiquinone] iron-sulfur protein 6, mitochondrial [OS=Homo sapiens]	0	66.48	58	7	153	7	124	13.7	8.28	455.04	7	other metabolic processes;transport	other membranes;mitochondrion	transporter activity;other molecular function	Pf10276	4726	ENSG00000145494	NDUFS6	hsa:4726; O75380	Electron transport chain: OXPHOS system in mitochondria; Nonalcoholic fatty liver disease; Oxidative phosphorylation	Complex I biogenesis	5	0	0.622	0.223662	0.70953	68.86	86.9	113.1	23.14	53.6	High	High	High	High	High	High	1
FALSE	High	Master Protein	P00367	Glutamate dehydrogenase 1, mitochondrial [OS=Homo sapiens]	0	93.889	51	20	152	20	558	61.4	7.8	386.4	20	other metabolic processes;other biological processes	mitochondrion;ER/Golgi;other cell component	other molecular function	Pf00208, Pf02812	2746	ENSG00000148672	GLUD1	B3KV55; B4DGN5; hsa:2746; P00367; Q5TBU3	VEGFA-VEGFR2 signaling; Amino acid metabolism; Metabolic reprogramming in colon cancer; 22q11.2 copy number variation syndrome; Amino acid metabolism pathway excerpt: histidine catabolism extension; 10q22q23 copy number variation	Transcriptional activation of mitochondrial biogenesis; Mitochondrial protein degradation; Glutamate and glutamine metabolism	9	0	0.769	0.635816	0.939954	56.86	89.6	110.4	40.07	23.19	High	High	High	High	High	High	1
FALSE	High	Master Protein	O00330	Pyruvate dehydrogenase protein X component, mitochondrial [OS=Homo sapiens]	0	102.854	42	16	152	16	501	54.1	8.66	399.64	16	other metabolic processes	mitochondrion;other cell component	other molecular function	Pf00198, Pf00364, Pf02817	8050	ENSG00000110435	PDHX	B4DW62; D3DR11; E9PB14; E9PBP7; hsa:8050; O00330; O60221; Q96FV8; Q99783	Amino acid metabolism	Glyoxylate metabolism and glycine degradation; Regulation of pyruvate dehydrogenase (PDH) complex; Signaling by Retinoic Acid	5	0	1.02	0.603306	0.93383	84.18	112.8	87.2	54.14	56.7	High	High	High	High	High	High	1
FALSE	High	Master Protein	Q9Y4G6	Talin-2 [OS=Homo sapiens]	0	182.335	24	43	151	35	2542	271.4	5.57	396.44	43	cell adhesion;cell organization and biogenesis	plasma membrane;other membranes;cytoskeleton;other cell component	signal transduction activity or receptor binding;cytoskeletal activity;other molecular function	Pf00373, Pf01608, Pf08913, Pf09141, Pf09379, Pf16511, Pf21692	83660	ENSG00000171914	TLN2	A6NLB8; hsa:83660; Q9Y4G6	Focal adhesion		1	0	0.9	0.913408	0.994751	65.33	137.8	62.2	13.66	29.62	High	High	High	High	High	High	1
FALSE	High	Master Protein	O75368	SH3 domain-binding glutamic acid-rich-like protein [OS=Homo sapiens]	0	67.034	71	8	151	8	114	12.8	5.25	469.43	8	protein metabolism;other metabolic processes;other biological processes	plasma membrane;other membranes;cytosol;nucleus;other cell component	other molecular function	Pf04908	6451	ENSG00000131171	SH3BGRL	hsa:6451; O75368; Q3SYL1; Q5JT50; Q6FIE8; Q9H0N8			0	0	0.783	0.683599	0.952994	54.61	94.8	105.2	28.94	41.53	High	High	High	High	High	High	1
FALSE	High	Master Protein	O75083	WD repeat-containing protein 1 [OS=Homo sapiens]	0	138.606	54	22	150	22	606	66.2	6.65	435.99	22	cell organization and biogenesis;other biological processes	non-structural extracellular;plasma membrane;other membranes;cytosol;cytoskeleton;other cell component	cytoskeletal activity	Pf00400	9948	ENSG00000071127	WDR1	A8K6E9; A8MPU4; hsa:9948; O75083; O75313; Q8N6E5; Q9UG05; Q9UG78; Q9UQE0	Hypertrophy model	Platelet degranulation	2	0	0.839	0.868801	0.988397	54.33	101.5	98.5	23.1	46.01	High	High	High	High	High	High	1
FALSE	High	Master Protein	Q9P2R7	Succinate--CoA ligase [ADP-forming] subunit beta, mitochondrial [OS=Homo sapiens]	0	105.411	43	22	150	22	463	50.3	7.42	367.8	22	other metabolic processes	mitochondrion;other cell component	other molecular function	Pf00549, Pf08442	8803	ENSG00000136143	SUCLA2	B2RDE7; hsa:8803; O95194; Q5T9Q4; Q5T9Q6; Q9NV21; Q9NVP7; Q9P2R7		Citric acid cycle (TCA cycle)	1	0	0.737	0.533837	0.918359	56.51	91.1	108.9	55.99	15.23	High	High	High	High	High	High	1
FALSE	High	Master Protein	Q14192	Four and a half LIM domains protein 2 [OS=Homo sapiens]	0	151.394	75	20	150	20	279	32.2	7.55	399.63	20	developmental processes;other biological processes	cytoskeleton;nucleus	other molecular function	Pf00412	2274	ENSG00000115641	FHL2	hsa:2274; Q13229; Q13644; Q14192; Q2I5I4; Q5TM15; Q9P294	Androgen receptor signaling pathway; RANKL/RANK signaling pathway; Ectoderm differentiation; VEGFA-VEGFR2 signaling	PPARA activates gene expression	5	0	1.318	0.155904	0.646198	73.85	115.3	84.7	41.1	47.32	High	High	High	High	High	High	1
FALSE	High	Master Protein	Q86TD4	Sarcalumenin [OS=Homo sapiens]	0	109.081	49	16	150	16	473	54.4	6.34	388.92	16		other membranes;cytosol;ER/Golgi	other molecular function	Pf00350, Pf16880	6345	ENSG00000185739	SRL	B4DYT9; hsa:6345; Q86TD4			0	0	0.506	0.0527475	0.354307	62.28	79.4	120.6	18.08	31.24	High	High	High	High	High	High	1
FALSE	High	Master Protein	Q9NP74	Palmdelphin [OS=Homo sapiens]	0	136.737	50	22	148	22	551	62.7	5.44	424.08	22	other biological processes	other membranes;other cell component		Pf03285	54873	ENSG00000099260	PALMD	hsa:54873; Q9H7E6; Q9NP74; Q9NPM5; Q9NPM6; Q9NPS0			0	0	0.986	0.687317	0.953873	61.31	106.3	93.7	41.33	39.69	High	High	High	High	High	High	1	Acetyl [N-Term]
FALSE	High	Master Protein	Q03252	Lamin-B2 [OS=Homo sapiens]	0	113.956	44	30	148	27	620	69.9	5.59	342.05	30	cell organization and biogenesis;transport;other biological processes	other membranes;cytoskeleton;nucleus	cytoskeletal activity;other molecular function	Pf00038, Pf00932	84823	ENSG00000176619	LMNB2	hsa:84823; O75292; Q03252; Q14734; Q96DF6	Gastric cancer network 2; Fas ligand pathway and stress induction of heat shock proteins; IL-18 signaling pathway; Familial partial lipodystrophy; Progeria-associated lipodystrophy; Acquired partial lipodystrophy / Barraquer-Simons syndrome		6	2	1.3	0.17003	0.66509	67.08	117.1	82.9	42.61	58.99	High	High	High	High	High	High	1
FALSE	High	Master Protein	P01008	Antithrombin-III [OS=Homo sapiens]	0	110.921	42	19	148	19	464	52.6	6.71	391.36	19	stress response;other biological processes	non-structural extracellular;plasma membrane;other membranes;ER/Golgi	enzyme regulator activity;other molecular function	Pf00079	462	ENSG00000117601	SERPINC1	B2R6P0; hsa:462; P01008; P78439; P78447; Q13815; Q5TC78; Q7KZ43; Q7KZ97; Q9UC78	Dengue-2 interactions with complement and coagulation cascades; Complement and coagulation cascades	Regulation of Insulin-like Growth Factor (IGF) transport and uptake by Insulin-like Growth Factor Binding Proteins (IGFBPs); Post-translational protein phosphorylation; Intrinsic Pathway of Fibrin Clot Formation; Common Pathway of Fibrin Clot Formation	6	0	0.579	0.141721	0.614553	78.98	71.9	128.1	46	34.55	High	High	High	High	High	High	1
FALSE	High	Master Protein	P28838	Cytosol aminopeptidase [OS=Homo sapiens]	0	126.212	52	23	148	23	519	56.1	7.93	363.74	23	protein metabolism	other cell component	other molecular function	Pf00883, Pf02789	51056	ENSG00000002549	LAP3	B3KMQ3; hsa:51056; P28838; Q6IAM6; Q6P0L6; Q9UQE3			0	0	1.489	0.0648357	0.393432	75.78	117.2	82.8	16.53	51.73	High	High	High	High	High	High	1
FALSE	High	Master Protein	P49411	Elongation factor Tu, mitochondrial [OS=Homo sapiens]	0	130.884	58	21	148	21	452	49.5	7.61	431.04	21											0	0	1.576	0.0405924	0.300635	69.57	129.2	70.8	31.88	18.57	High	High	High	High	High	High	1
FALSE	High	Master Protein	P19367	Hexokinase-1 [OS=Homo sapiens]	0	129.931	40	31	147	31	917	102.4	6.8	301.75	31	other metabolic processes;stress response;other biological processes	other membranes;cytosol;mitochondrion	kinase activity;other molecular function	Pf00349, Pf03727	3098	ENSG00000156515	HK1	E9PCK0; hsa:3098; O43443; O43444; O75574; P19367; Q5VTC3; Q96HC8; Q9NNZ4; Q9NNZ5	Cori cycle; Photodynamic therapy-induced HIF-1 survival signaling; Clear cell renal cell carcinoma pathways; Aerobic glycolysis; Disorders of fructose metabolism; Glucose metabolism in triple-negative breast cancer cells; Glycolysis and gluconeogenesis; Metabolic Epileptic Disorders; UDP-derived sugars synthesis in fibroblasts; Glucuronidation	Glycolysis; Defective HK1 causes hexokinase deficiency (HK deficiency)	12	0	0.652	0.292963	0.788303	65.81	81	119	55.68	35.32	High	High	High	High	High	High	1	Acetyl [N-Term]
FALSE	High	Master Protein	P15311	Ezrin [OS=Homo sapiens]	0	109.787	39	23	146	16	586	69.4	6.27	389.44	23	cell adhesion;cell cycle OR cell proliferation;cell organization and biogenesis;transport;signal transduction;other biological processes	plasma membrane;other membranes;cytosol;cytoskeleton;nucleus;other cytoplasmic organelle;other cell component	cytoskeletal activity;other molecular function	Pf00373, Pf00769, Pf09379, Pf09380, Pf20492	7430	ENSG00000092820	EZR	E1P5A8; hsa:7430; P15311; P23714; Q4VX75; Q96CU8; Q9NSJ4	Pathogenic Escherichia coli infection; AGE/RAGE pathway; VEGFA-VEGFR2 signaling; 16p11.2 proximal deletion syndrome; CCL18 signaling pathway; Regulation of actin cytoskeleton; GDNF signaling	Recycling pathway of L1; Sensory processing of sound by inner hair cells of the cochlea; Sensory processing of sound by outer hair cells of the cochlea; Netrin-1 signaling	11	0	0.732	0.518944	0.908567	60.91	100.8	99.2	16.36	32.38	High	High	High	High	High	High	1
FALSE	High	Master Protein	P00747	Plasminogen [OS=Homo sapiens]	0	185.009	59	34	146	34	810	90.5	7.24	373.98	34	cell-cell signaling;cell organization and biogenesis;protein metabolism;stress response;developmental processes;other biological processes	non-structural extracellular;plasma membrane;other membranes;other cell component	signal transduction activity or receptor binding;other molecular function	Pf00024, Pf00051, Pf00089	5340	ENSG00000122194	PLG	hsa:5340; P00747; Q15146; Q5TEH4; Q6PA00	Selenium micronutrient network; Vitamin B12 metabolism; Folate metabolism; Blood clotting cascade; Complement system; Dengue-2 interactions with complement and coagulation cascades; Fibrin complement receptor 3 signaling pathway; Complement and coagulation cascades	Platelet degranulation ; Regulation of Insulin-like Growth Factor (IGF) transport and uptake by Insulin-like Growth Factor Binding Proteins (IGFBPs); Signaling by PDGF; Activation of Matrix Metalloproteinases; Dissolution of Fibrin Clot	14	0	1.296	0.172567	0.66835	84.54	87.1	112.9	90.42	45.5	High	High	High	High	High	High	1
FALSE	High	Master Protein	P04275	von Willebrand factor [OS=Homo sapiens]	0	179.72	22	41	145	41	2813	309.1	5.48	343.4	41	cell adhesion;stress response;other biological processes	non-structural extracellular;extracellular matrix;ER/Golgi;other cell component	signal transduction activity or receptor binding;other molecular function	Pf00092, Pf00093, Pf00094, Pf01826, Pf08742, Pf16164	7450	ENSG00000110799	VWF	hsa:7450; P04275; Q8TCE8; Q99806	Blood clotting cascade; Focal adhesion; Dengue-2 interactions with complement and coagulation cascades; Focal adhesion: PI3K-Akt-mTOR-signaling pathway; PI3K-Akt signaling pathway; 22q11.2 copy number variation syndrome; Complement and coagulation cascades	Intrinsic Pathway of Fibrin Clot Formation; Platelet degranulation ; Integrin cell surface interactions; Signaling by BRAF and RAF1 fusions; Signaling by moderate kinase activity BRAF mutants; Paradoxical activation of RAF signaling by kinase inactive BRAF; Signaling downstream of RAS mutants; Signaling by RAF1 mutants; MAP2K and MAPK activation; Signaling by high-kinase activity BRAF mutants; GR…	30	0	0.985	0.692512	0.954938	93.83	77.6	122.4	103.86	42.35	High	High	High	High	High	High	1
FALSE	High	Master Protein	P08572	Collagen alpha-2(IV) chain [OS=Homo sapiens]	0	108.62	11	12	145	12	1712	167.4	8.66	396.02	12	cell organization and biogenesis;RNA metabolism OR transcription;other metabolic processes;developmental processes;signal transduction;other biological processes	non-structural extracellular;extracellular matrix;ER/Golgi	extracellular structural activity;other molecular function	Pf01391, Pf01413	1284	ENSG00000134871	COL4A2	hsa:1284; P08572; Q14052; Q548C3; Q5VZA9; Q66K23	miRNA targets in ECM and membrane receptors; Focal adhesion; Hepatitis C and hepatocellular carcinoma; Focal adhesion: PI3K-Akt-mTOR-signaling pathway; PI3K-Akt signaling pathway; Epithelial to mesenchymal transition in colorectal cancer; Small cell lung cancer; Pleural mesothelioma	Integrin cell surface interactions; ECM proteoglycans; Non-integrin membrane-ECM interactions; Collagen degradation; Signaling by PDGF; NCAM1 interactions; Collagen chain trimerization; Laminin interactions; Anchoring fibril formation; Crosslinking of collagen fibrils; Scavenging by Class A Receptors	22	0	1.436	0.0855411	0.462307	85.8	107.2	92.8	89.94	33.47	High	High	High	High	High	High	1
TRUE	High	Master Protein	P09936	Ubiquitin carboxyl-terminal hydrolase isozyme L1 [OS=Homo sapiens]	0	79.31	52	9	145	9	223	24.8	5.48	426.08	9	cell cycle OR cell proliferation;cell organization and biogenesis;protein metabolism;other metabolic processes;stress response;transport;developmental processes;other biological processes	other membranes;cytosol;ER/Golgi;nucleus;other cell component	signal transduction activity or receptor binding;other molecular function	Pf01088	7345	ENSG00000154277	UCHL1	hsa:7345; P09936; Q4W5K6; Q71UM0	Proteasome degradation; Parkinson's disease pathway; Hepatitis C and hepatocellular carcinoma	UCH proteinases	4	0	2.271	0.0008706	0.016104	67.79	140.7	59.3	43.26	41.96	High	High	High	High	High	High	1
FALSE	High	Master Protein	Q02818	Nucleobindin-1 [OS=Homo sapiens]	0	129.797	60	24	144	24	461	53.8	5.25	374.79	24	signal transduction	ER/Golgi	enzyme regulator activity;nucleic acid binding activity;other molecular function		4924	ENSG00000104805	NUCB1	B2RD64; hsa:4924; Q02818; Q15838; Q7Z4J7; Q9BUR1		Regulation of Insulin-like Growth Factor (IGF) transport and uptake by Insulin-like Growth Factor Binding Proteins (IGFBPs); Post-translational protein phosphorylation	2	0	0.887	0.976866	0.999898	50.52	93.3	106.7	38.38	17.12	High	High	High	High	High	High	1
FALSE	High	Master Protein	P09651	Heterogeneous nuclear ribonucleoprotein A1 [OS=Homo sapiens]	0	136.79	46	21	144	18	372	38.7	9.13	362.62	21	cell organization and biogenesis;protein metabolism;RNA metabolism OR transcription;other metabolic processes;stress response;transport;other biological processes	cytosol;nucleus;other cell component	nucleic acid binding activity;other molecular function	Pf00076, Pf11627	3178	ENSG00000135486	HNRNPA1	A8K4Z8; hsa:3178; P09651; Q3MIB7; Q6PJZ7	mRNA processing	mRNA Splicing - Major Pathway; FGFR2 alternative splicing; Processing of Capped Intron-Containing Pre-mRNA; SARS-CoV-1-host interactions; SARS-CoV-1 modulates host translation machinery	6	0	1.424	0.109046	0.537373	92.16	145.6	54.4	16.91	103.99	High	High	High	High	High	High	1
FALSE	High	Master Protein	O43399	Tumor protein D54 [OS=Homo sapiens]	0	110.227	73	14	143	14	206	22.2	5.36	431.58	14	other metabolic processes;other biological processes	other cell component	other molecular function	Pf04201	7165	ENSG00000101150	TPD52L2	B4DPJ6; E1P5G7; hsa:7165; O43398; O43399; Q5JWU5; Q5JWU6; Q5JWU8; Q5U0E0; Q9H3Z6			0	0	0.884	0.984451	0.999898	63.22	90.2	109.8	47.25	33.35	High	High	High	High	High	High	1	Acetyl [N-Term]
FALSE	High	Master Protein	P47755	F-actin-capping protein subunit alpha-2 [OS=Homo sapiens]	0	109.595	70	14	143	12	286	32.9	5.85	479.73	14	cell organization and biogenesis	non-structural extracellular;other membranes;cytosol;cytoskeleton;other cell component	cytoskeletal activity	Pf01267	830	ENSG00000198898	CAPZA2	B4DG50; hsa:830; P47755		MHC class II antigen presentation; HSP90 chaperone cycle for steroid hormone receptors (SHR) in the presence of ligand; COPI-mediated anterograde transport; COPI-independent Golgi-to-ER retrograde traffic; Sensory processing of sound by inner hair cells of the cochlea; Factors involved in megakaryocyte development and platelet production; Advanced glycosylation endproduct receptor signaling	7	2	0.788	0.700127	0.957267	48.62	80.7	119.3	26.34	26.63	High	High	High	High	High	High	1
FALSE	High	Master Protein	P22314	Ubiquitin-like modifier-activating enzyme 1 [OS=Homo sapiens]	0	124.647	40	27	143	27	1058	117.8	5.76	389.1	27	protein metabolism;other metabolic processes;stress response	cytosol;mitochondrion;nucleus;other cell component	other molecular function	Pf00899, Pf09358, Pf10585, Pf16190, Pf16191	7317	ENSG00000130985	UBA1	hsa:7317; P22314; Q5JRR8; Q96E13	Proteasome degradation; Parkin-ubiquitin proteasomal system pathway; Parkinson's disease pathway	Synthesis of active ubiquitin: roles of E1 and E2 enzymes; Antigen processing: Ubiquitination & Proteasome degradation	5	0	0.555	0.134148	0.599812	74.32	63.2	136.8	58.93	43.25	High	High	High	High	High	High	1
FALSE	High	Master Protein	P09211	Glutathione S-transferase P [OS=Homo sapiens]	0	86.027	64	9	143	9	210	23.3	5.64	461.63	9	cell cycle OR cell proliferation;other metabolic processes;stress response;developmental processes;other biological processes	non-structural extracellular;cytosol;mitochondrion;nucleus;other cell component	enzyme regulator activity;other molecular function	Pf02798, Pf14497	2950	ENSG00000084207	GSTP1	hsa:2950; O00460; P09211; Q15690; Q5TZY3	Nuclear receptors meta-pathway; NRF2 pathway; Photodynamic therapy-induced NFE2L2 (NRF2) survival signaling; Exercise-induced circadian regulation; Omega-6-fatty acids in senescence; Arachidonate epoxygenase / epoxide hydrolase; Metapathway biotransformation Phase I and II	Neutrophil degranulation; Detoxification of Reactive Oxygen Species; Paracetamol ADME; Glutathione conjugation	11	0	0.538	0.0844219	0.458513	67.45	78.5	121.5	61.48	11.32	High	High	High	High	High	High	1
FALSE	High	Master Protein	P02760	Protein AMBP [OS=Homo sapiens]	0	102.285	36	11	142	11	352	39	6.25	362.66	11	cell adhesion;other metabolic processes;other biological processes	non-structural extracellular;plasma membrane;other membranes;cytosol;mitochondrion;ER/Golgi;nucleus;other cell component	enzyme regulator activity;other molecular function	Pf00014, Pf00061	259	ENSG00000106927	AMBP	hsa:259; P00977; P02759; P02760; P78491; Q2TU33; Q5TBD7; Q9UC58; Q9UDI8		Scavenging of heme from plasma	1	0	0.849	0.900292	0.994582	114.7	77.2	122.8	110.87	55.04	High	High	High	High	High	High	1
FALSE	High	Master Protein	P63241	Eukaryotic translation initiation factor 5A-1 [OS=Homo sapiens]	0	98.144	53	11	142	11	154	16.8	5.24	466.02	11	protein metabolism;other metabolic processes;signal transduction;other biological processes	other membranes;cytosol;ER/Golgi;nucleus;other cell component	translation activity;nucleic acid binding activity	Pf01287, Pf21485	1984	ENSG00000132507; ENSG00000288145	EIF5A	A8K9A0; D3DTP2; hsa:1984; P10159; P63241; Q16182; Q7L7L3; Q7Z4L1; Q9D0G2	Translation factors; eIF5A regulation in response to inhibition of the nuclear export system	Hypusine synthesis from eIF5A-lysine	3	0	0.844	0.884905	0.990248	59.53	102.1	97.9	40.99	27.81	High	High	High	High	High	High	1
FALSE	High	Master Protein	P02794	Ferritin heavy chain [OS=Homo sapiens]	0	125.461	64	12	142	12	183	21.2	5.55	448.32	12	transport;other biological processes	non-structural extracellular;cytosol;other cytoplasmic organelle;other cell component	other molecular function	Pf00210	2495	ENSG00000167996	FTH1	B3KNR5; hsa:2495; P02794; Q3KRA8; Q3SWW1	Iron metabolism in placenta; Nuclear receptors meta-pathway; NRF2 pathway; Ferroptosis; Iron metabolism disorders	Neutrophil degranulation; Golgi Associated Vesicle Biogenesis; Iron uptake and transport; Scavenging by Class A Receptors	9	0	1.171	0.314898	0.807745	92.82	118.3	81.7	84.39	38.81	High	High	High	High	High	High	1
FALSE	High	Master Protein	P13611	Versican core protein [OS=Homo sapiens]	0	91.589	7	19	142	19	3396	372.6	4.51	385.17	19	cell adhesion;developmental processes;other biological processes	non-structural extracellular;extracellular matrix;ER/Golgi;other cytoplasmic organelle;other cell component	extracellular structural activity;other molecular function	Pf00008, Pf00059, Pf00084, Pf00193, Pf07686	1462	ENSG00000038427	VCAN	hsa:1462; P13611; P20754; Q13010; Q13189; Q15123; Q9UCL9; Q9UNW5	Spinal cord injury; Comprehensive IL-17A signaling	ECM proteoglycans; Regulation of Insulin-like Growth Factor (IGF) transport and uptake by Insulin-like Growth Factor Binding Proteins (IGFBPs); Post-translational protein phosphorylation; A tetrasaccharide linker sequence is required for GAG synthesis; Defective B4GALT7 causes EDS, progeroid type; Defective B3GAT3 causes JDSSDHD; Defective B3GALT6 causes EDSP2 and SEMDJL1; Chondroitin sulfate bio…	15	0	0.508	0.0541561	0.358617	61.07	66.4	133.6	50.49	44.34	High	High	High	High	High	High	1
FALSE	High	Master Protein	Q86VF7	Nebulin-related-anchoring protein [OS=Homo sapiens]	0	178.991	31	44	141	44	1730	197	9.2	344.5	44	cell organization and biogenesis;developmental processes	cytoskeleton;other cell component	cytoskeletal activity;other molecular function	Pf00412, Pf00880	4892	ENSG00000197893	NRAP	hsa:4892; O15500; Q5VWI3; Q5VWI4; Q6MZK3; Q6N026; Q6N059; Q6NSH8; Q6PDB0; Q719H6; Q86TC5; Q86TD6; Q86TE6; Q86VF6; Q86VF7; Q8N3R6; Q8N8F9; Q8TCH0; Q96MG4			0	0	0.942	0.801956	0.973515	86.25	119.7	80.3	41.42	98.87	High	High	High	High	High	High	1
FALSE	High	Master Protein	P24844	Myosin regulatory light polypeptide 9 [OS=Homo sapiens]	0	97.253	84	13	141	7	172	19.8	4.92	389.39	13	cell organization and biogenesis;other biological processes	cytosol;cytoskeleton;other cell component	cytoskeletal activity;other molecular function	Pf13499	10398	ENSG00000101335	MYL9	E1P5T6; hsa:10398; P24844; Q9BQL9; Q9BUF9; Q9H136	Focal adhesion; Striated muscle contraction pathway	Smooth Muscle Contraction; RHO GTPases activate CIT; RUNX1 regulates genes involved in megakaryocyte differentiation and platelet function; EPHA-mediated growth cone collapse; Sema4D induced cell migration and growth-cone collapse; RHO GTPases activate PKNs; RHO GTPases Activate ROCKs; RHO GTPases activate PAKs	10	8	0.785	0.688659	0.954698	74.86	88.1	111.9	47.77	53.88	High	High	High	High	High	High	1
FALSE	High	Master Protein	Q15365	Poly(rC)-binding protein 1 [OS=Homo sapiens]	0	103.17	62	14	141	11	356	37.5	7.09	393.87	14	RNA metabolism OR transcription;other metabolic processes;other biological processes	cytosol;nucleus;other cell component	nucleic acid binding activity;other molecular function	Pf00013	5093	ENSG00000169564	PCBP1	hsa:5093; Q13157; Q14975; Q15365	Ferroptosis	mRNA Splicing - Major Pathway; Processing of Capped Intron-Containing Pre-mRNA	3	3	1.015	0.615435	0.937724	68.19	116	84	21.23	49.76	High	High	High	High	High	High	1
FALSE	High	Master Protein	P04040	Catalase [OS=Homo sapiens]	0	161.511	70	27	141	27	527	59.7	7.39	392.37	27	protein metabolism;other metabolic processes;stress response;developmental processes;other biological processes	non-structural extracellular;other membranes;cytosol;mitochondrion;other cytoplasmic organelle;other cell component	other molecular function	Pf00199, Pf06628	847	ENSG00000121691	CAT	A8K6C0; B2RCZ9; D3DR07; hsa:847; P04040; Q2M1U4; Q4VXX5; Q9BWT9; Q9UC85	Selenium micronutrient network; Folate metabolism; Amyotrophic lateral sclerosis (ALS); Oxidative stress response; Tryptophan metabolism; Male infertility; Arsenic metabolism and reactive oxygen species generation; DNA damage response (only ATM dependent)	Peroxisomal protein import; FOXO-mediated transcription of oxidative stress, metabolic and neuronal genes; Neutrophil degranulation; Detoxification of Reactive Oxygen Species	12	0	1.707	0.0229404	0.210823	93.78	105.9	94.1	128.8	34.46	High	High	High	High	High	High	1
TRUE	High	Master Protein	P00338	L-lactate dehydrogenase A chain [OS=Homo sapiens]	0	82.446	66	18	140	17	332	36.7	8.27	341.22	18	other metabolic processes	cytosol;mitochondrion;other cell component	other molecular function	Pf00056, Pf02866	3939	ENSG00000134333; ENSG00000288299	LDHA	B4DKQ2; B7Z5E3; D3DQY3; F8W819; hsa:3939; P00338; Q53G53; Q6IBM7; Q6ZNV1; Q9UDE8; Q9UDE9	Cori cycle; HIF1A and PPARG regulation of glycolysis; Photodynamic therapy-induced HIF-1 survival signaling; VEGFA-VEGFR2 signaling; Amino acid metabolism; Clear cell renal cell carcinoma pathways; PI3K/AKT/mTOR - vitamin D3 signaling; Hereditary leiomyomatosis and renal cell carcinoma pathway; Metabolic reprogramming in colon cancer; Aerobic glycolysis; Glycolysis in senescence; Orexin receptor …	Pyruvate metabolism	20	0	0.451	0.019191	0.187935	58.95	66.3	133.7	26.76	31.29	High	High	High	High	High	High	1
FALSE	High	Master Protein	P60981	Destrin [OS=Homo sapiens]	0	89.403	74	15	139	14	165	18.5	7.85	347.77	15	cell organization and biogenesis;other biological processes	cytoskeleton;other cell component	cytoskeletal activity	Pf00241	11034	ENSG00000125868	DSTN	B2R6N2; B4DYA6; hsa:11034; P18282; P60981; Q5W166; Q6IAW2	Androgen receptor signaling pathway		1	0	1.054	0.524554	0.91215	71.16	113.5	86.5	29.74	47.77	High	High	High	High	High	High	1
TRUE	High	Master Protein	P00325	All-trans-retinol dehydrogenase [NAD(+)] ADH1B [OS=Homo sapiens]	0	115.383	43	14	139	7	375	39.8	8.19	374.06	14	other metabolic processes	plasma membrane;other membranes;cytosol;nucleus	other molecular function	Pf00107, Pf08240	125	ENSG00000196616	ADH1B	A8MYN5; B4DRS9; B4DVC3; hsa:125; P00325; Q13711; Q4ZGI9; Q96KI7	Fatty acid omega-oxidation; Ethanol effects on histone modifications	Ethanol oxidation	3	7	0.448	0.0179722	0.178742	98.39	62.9	137.1	100.31	24.53	High	High	High	High	High	High	1
FALSE	High	Master Protein	P02743	Serum amyloid P-component [OS=Homo sapiens]	0	51.143	31	9	137	9	223	25.4	6.54	334.78	9	cell organization and biogenesis;protein metabolism;other metabolic processes;stress response;other biological processes	non-structural extracellular	other molecular function	Pf00354	325	ENSG00000132703	APCS	hsa:325; P02743	Complement system	Amyloid fiber formation	2	0	1.057	0.518328	0.90826	94.11	114.9	85.1	51.86	84.88	High	High	High	High	High	High	1
FALSE	High	Master Protein	Q14103	Heterogeneous nuclear ribonucleoprotein D0 [OS=Homo sapiens]	0	74.017	34	11	136	9	355	38.4	7.81	377.36	11	RNA metabolism OR transcription;other metabolic processes;developmental processes;other biological processes	cytosol;nucleus;other cell component	nucleic acid binding activity;other molecular function	Pf00076, Pf08143	3184	ENSG00000138668	HNRNPD	A8K9J2; hsa:3184; P07029; Q01858; Q14100; Q14101; Q14102; Q14103; Q4W5A1; Q9UCE8; Q9UCE9	mRNA processing	mRNA Splicing - Major Pathway; Processing of Capped Intron-Containing Pre-mRNA	3	2	0.928	0.852112	0.985126	80.72	108	92	53.15	53.19	High	High	High	High	High	High	1
FALSE	High	Master Protein	P34932	Heat shock 70 kDa protein 4 [OS=Homo sapiens]	0	144.597	45	27	136	27	840	94.3	5.19	358.64	27	cell organization and biogenesis;protein metabolism;other metabolic processes;stress response;transport	non-structural extracellular;cytosol;mitochondrion;nucleus	other molecular function	Pf00012	3308	ENSG00000170606	HSPA4	hsa:3308; O95756; P34932; Q2TAL4; Q9BUK9	Parkin-ubiquitin proteasomal system pathway; HDAC6 interactions in the central nervous system	Regulation of HSF1-mediated heat shock response	3	0	0.73	0.571643	0.928723	55	80.1	119.9	56.49	2.2	High	High	High	High	High	High	1
FALSE	High	Master Protein	P15924	Desmoplakin [OS=Homo sapiens]	0	150.088	17	39	136	39	2871	331.6	6.81	329.83	39	cell adhesion;cell organization and biogenesis;protein metabolism;other metabolic processes;stress response;developmental processes;other biological processes	plasma membrane;other membranes;cytoskeleton;other cell component	cytoskeletal activity;other molecular function	Pf00681, Pf17902, Pf18373, Pf21019	1832	ENSG00000096696	DSP	B2RTT2; D7RX09; hsa:1832; O75993; P15924; Q14189; Q9UHN4	Arrhythmogenic right ventricular cardiomyopathy; Lung fibrosis; Epithelial to mesenchymal transition in colorectal cancer	Formation of the cornified envelope; Neutrophil degranulation; RND3 GTPase cycle; RND1 GTPase cycle; Apoptotic cleavage of cell adhesion proteins	9	0	1.448	0.0802656	0.448667	90.22	143.1	56.9	31.2	92.46	High	High	High	High	High	High	1
TRUE	High	Master Protein	P02652	Apolipoprotein A-II [OS=Homo sapiens]	0	39.754	62	7	136	7	100	11.2	6.62	401.94	7	cell organization and biogenesis;protein metabolism;other metabolic processes;transport;other biological processes	non-structural extracellular;cytosol;ER/Golgi;other cytoplasmic organelle	signal transduction activity or receptor binding;transporter activity;enzyme regulator activity;other molecular function	Pf04711	336	ENSG00000158874	APOA2	B2R524; hsa:336; P02652	PPAR-alpha pathway; Nuclear receptors meta-pathway; Dengue-2 interactions with complement and coagulation cascades; PPAR signaling pathway; Statin inhibition of cholesterol production; Familial hyperlipidemia type 1; Familial hyperlipidemia type 2; Familial hyperlipidemia type 3; Familial hyperlipidemia type 4; Familial hyperlipidemia type 5; Cholesterol metabolism	PPARA activates gene expression; Regulation of Insulin-like Growth Factor (IGF) transport and uptake by Insulin-like Growth Factor Binding Proteins (IGFBPs); Post-translational protein phosphorylation; Retinoid metabolism and transport; Chylomicron assembly; Chylomicron remodeling	17	0	2.021	0.00350989	0.0531066	106.21	97.9	102.1	71.07	70.36	High	High	High	High	High	High	1
FALSE	High	Master Protein	Q03591	Complement factor H-related protein 1 [OS=Homo sapiens]	0	101.616	52	13	135	3	330	37.6	7.39	396.48	13	stress response;other biological processes	non-structural extracellular;other cell component	other molecular function	Pf00084	3078	ENSG00000244414	CFHR1	A8K465; hsa:3078; Q03591; Q3B774; Q9UJ17		Regulation of Complement cascade	1	5	0.764	0.621715	0.937983	76.55	84.3	115.7	52.12	57.69	High	High	High	High	High	High	1
FALSE	High	Master Protein	P36871	Phosphoglucomutase-1 [OS=Homo sapiens]	0	122.996	53	23	135	23	562	61.4	6.76	305.27	23	other metabolic processes	non-structural extracellular;cytosol;other cell component	other molecular function	Pf02878, Pf02879, Pf02880	5236	ENSG00000079739	PGM1	B2R5N9; B4DPV0; hsa:5236; P36871; Q16105; Q16106; Q5BKZ9; Q6NW22; Q86U74; Q96J40; Q9NTY4	Ectoderm differentiation; Clear cell renal cell carcinoma pathways; Glycogen synthesis and degradation; Opioid receptor pathways; Disorders of galactose metabolism ; Disorders of fructose metabolism; UDP-derived sugars synthesis in fibroblasts; Glucuronidation	Neutrophil degranulation; Glycogen synthesis; Glycogen breakdown (glycogenolysis); Galactose catabolism; Defective PGM1 causes PGM1-CDG	13	0	0.505	0.0514455	0.351523	68.82	64.9	135.1	53.6	35.33	High	High	High	High	High	High	1
FALSE	High	Master Protein	Q14894	Ketimine reductase mu-crystallin [OS=Homo sapiens]	0	96.674	61	13	134	13	314	33.8	5.14	349.46	13	other metabolic processes;transport;other biological processes	cytosol;mitochondrion;nucleus;other cytoplasmic organelle;other cell component	other molecular function	Pf02423	1428	ENSG00000103316	CRYM	D5MNX0; hsa:1428; Q14894; Q5HYB7		Lysine catabolism	1	0	0.953	0.778849	0.97229	68.05	112.7	87.3	46.58	30.84	High	High	High	High	High	High	1
FALSE	High	Master Protein	Q9H2U2	Inorganic pyrophosphatase 2, mitochondrial [OS=Homo sapiens]	0	96.831	60	16	133	15	334	37.9	7.39	347.23	16	other metabolic processes;other biological processes	mitochondrion;other cell component	other molecular function	Pf00719	27068	ENSG00000138777	PPA2	B4DLP7; F8WDN9; hsa:27068; I6L9B6; Q4W5E9; Q6PG51; Q8TBW0; Q96E55; Q9H0T0; Q9H2U2; Q9NX37; Q9P033; Q9ULX0		Mitochondrial tRNA aminoacylation; Pyrophosphate hydrolysis	2	0	0.927	0.853718	0.985251	59.14	107.4	92.6	37.97	37.18	High	High	High	High	High	High	1
FALSE	High	Master Protein	P46976	Glycogenin-1 [OS=Homo sapiens]	0	112.09	32	14	133	14	350	39.4	5.53	388.55	14	other metabolic processes	non-structural extracellular;cytosol;other cytoplasmic organelle;other cell component	other molecular function	Pf01501	2992	ENSG00000163754	GYG1	D3DNH0; D3DNH1; D3DNH2; hsa:2992; P46976; Q6FHZ1; Q9UNV0	Insulin signaling; Glycogen synthesis and degradation; Disorders of galactose metabolism	Neutrophil degranulation; Glycogen synthesis; Glycogen breakdown (glycogenolysis); Myoclonic epilepsy of Lafora; Glycogen storage disease type II (GAA); Glycogen storage disease type XV (GYG1); Glycogen storage disease type 0 (muscle GYS1)	10	0	1.302	0.168366	0.662563	91.08	127.1	72.9	44.48	37.89	High	High	High	High	High	High	1
FALSE	High	Master Protein	O14958	Calsequestrin-2 [OS=Homo sapiens]	0	92.831	35	14	132	14	399	46.4	4.37	392.43	14	cell-cell signaling;cell organization and biogenesis;signal transduction;other biological processes	other membranes;cytosol;cytoskeleton;ER/Golgi;other cell component	other molecular function	Pf01216	845	ENSG00000118729	CASQ2	B2R7M6; B4DIB0; hsa:845; O14958; Q5T1D2; Q8TBW8	Calcium regulation in cardiac cells	Stimuli-sensing channels; Ion homeostasis	3	0	0.605	0.188772	0.674339	83.05	81.7	118.3	67.54	30.29	High	High	High	High	High	High	1
FALSE	High	Master Protein	P30085	UMP-CMP kinase [OS=Homo sapiens]	0	93.195	62	12	131	12	196	22.2	5.57	371.98	12	other metabolic processes	cytosol;nucleus;other cell component	kinase activity;other molecular function	Pf00406	51727	ENSG00000162368	CMPK1	B2R6S5; B4DPU7; E9PGI8; hsa:51727; P30085; Q53GB7; Q5SVZ0; Q96C07; Q9UBQ8; Q9UIA2	Pyrimidine metabolism	Interconversion of nucleotide di- and triphosphates	2	0	1.044	0.547916	0.921858	83.03	119.7	80.3	25.47	58.3	High	High	High	High	High	High	1
FALSE	High	Master Protein	P17980	26S proteasome regulatory subunit 6A [OS=Homo sapiens]	0	105.403	46	16	131	16	439	49.2	5.24	324.77	16	protein metabolism;other metabolic processes;other biological processes	non-structural extracellular;cytosol;nucleus;other cell component	other molecular function	Pf00004, Pf16450, Pf17862	5702	ENSG00000165916	PSMC3	B2R8V1; hsa:5702; P17980; Q3B757; Q3B865; Q53HU5; Q6GPG8; Q6IBS1; Q96HD3	Proteasome degradation; Alzheimer's disease and miRNA effects; Parkin-ubiquitin proteasomal system pathway; Alzheimer's disease	Separation of Sister Chromatids; The role of GTSE1 in G2/M progression after G2 checkpoint; Neutrophil degranulation; Cdc20:Phospho-APC/C mediated degradation of Cyclin A; UCH proteinases; Ub-specific processing proteases; RUNX1 regulates transcription of genes involved in differentiation of HSCs; Regulation of expression of SLITs and ROBOs; FCERI mediated NF-kB activation; Downstream TCR signali…	64	0	1.137	0.39088	0.865133	57.62	120.2	79.8	47.1	49.19	High	High	High	High	High	High	1
FALSE	High	Master Protein	Q08043	Alpha-actinin-3 [OS=Homo sapiens]	0	89.326	15	15	131	1	901	103.2	5.52	329.03	15	cell adhesion;cell organization and biogenesis;developmental processes;other biological processes	plasma membrane;other membranes;cytosol;cytoskeleton;other cell component	signal transduction activity or receptor binding;cytoskeletal activity;other molecular function	Pf00307, Pf00435, Pf08726	89	ENSG00000248746	ACTN3	A6NP77; hsa:89; Q08043; Q4KKV2	Arrhythmogenic right ventricular cardiomyopathy; Striated muscle contraction pathway	Striated Muscle Contraction; Nephrin family interactions	4	0	1.54	0.151048	0.631731	113.51	105.4	94.6	108.32	49.78	Not Found	Peak Found	Peak Found	Peak Found	High	Peak Found	1
TRUE	High	Master Protein	P11217	Glycogen phosphorylase, muscle form [OS=Homo sapiens]	0	131.181	45	32	131	26	842	97	7.03	298.78	32	other metabolic processes	cytosol;other cell component	other molecular function	Pf00343	5837	ENSG00000068976	PYGM	A0AVK1; A6NDY6; hsa:5837; P11217	Glycogen synthesis and degradation	Glycogen breakdown (glycogenolysis)	2	0	0.321	0.000938467	0.0171933	73.37	49.1	150.9	69.21	61.57	Peak Found	High	High	High	High	High	1
FALSE	High	Master Protein	O15230	Laminin subunit alpha-5 [OS=Homo sapiens]	0	150.44	14	36	130	36	3695	399.5	7.02	302.25	36	cell adhesion;cell organization and biogenesis;developmental processes;signal transduction;other biological processes	non-structural extracellular;extracellular matrix;other cell component	signal transduction activity or receptor binding	Pf00052, Pf00053, Pf00054, Pf00055, Pf02210, Pf06008, Pf06009	3911	ENSG00000130702	LAMA5	hsa:3911; O15230; Q5U4N9; Q8TDF8; Q8WZA7; Q9H1P1	Alpha 6 beta 4 signaling pathway; Primary focal segmental glomerulosclerosis (FSGS); Complement system; Focal adhesion; Focal adhesion: PI3K-Akt-mTOR-signaling pathway; PI3K-Akt signaling pathway; Inflammatory response pathway; Small cell lung cancer; Pleural mesothelioma	Degradation of the extracellular matrix; ECM proteoglycans; Non-integrin membrane-ECM interactions; Interleukin-4 and Interleukin-13 signaling; Laminin interactions; MET activates PTK2 signaling	15	0	0.835	0.890826	0.992427	80.08	96.5	103.5	72.76	31.48	High	High	High	High	High	High	1
FALSE	High	Master Protein	P17931	Galectin-3 [OS=Homo sapiens]	0	51.805	28	6	130	6	250	26.1	8.56	366.36	6	RNA metabolism OR transcription;other metabolic processes;stress response;signal transduction;other biological processes	plasma membrane;other membranes;cytosol;mitochondrion;nucleus;other cell component	signal transduction activity or receptor binding;enzyme regulator activity;other molecular function	Pf00337	3958	ENSG00000131981	LGALS3	B2RC38; hsa:3958; P17931; Q16005; Q6IBA7; Q96J47	AGE/RAGE pathway; Spinal cord injury; 2q13 copy number variation syndrome; Immune infiltration in pancreatic cancer	Neutrophil degranulation; RUNX1 regulates transcription of genes involved in differentiation of myeloid cells; Advanced glycosylation endproduct receptor signaling; RUNX2 regulates genes involved in differentiation of myeloid cells	8	0	0.825	0.821259	0.976866	45.92	96.3	103.7	31.03	35.69	High	High	High	High	High	High	1
FALSE	High	Master Protein	P04083	Annexin A1 [OS=Homo sapiens]	0	100.605	66	19	130	19	346	38.7	7.02	362.6	19	cell-cell signaling;cell organization and biogenesis;protein metabolism;other metabolic processes;stress response;transport;developmental processes;signal transduction;other biological processes	non-structural extracellular;plasma membrane;other membranes;cytosol;cytoskeleton;nucleus;other cytoplasmic organelle;other cell component	signal transduction activity or receptor binding;enzyme regulator activity;other molecular function	Pf00191	301	ENSG00000135046	ANXA1	B5BU38; hsa:301; P04083	Spinal cord injury; VEGFA-VEGFR2 signaling; Prostaglandin synthesis and regulation	Smooth Muscle Contraction; G alpha (q) signalling events; G alpha (i) signalling events; Interleukin-4 and Interleukin-13 signaling; Formyl peptide receptors bind formyl peptides and many other ligands	8	0	0.769	0.638662	0.939954	57.06	82.3	117.7	12.14	32.72	High	High	High	High	High	High	1
FALSE	High	Master Protein	Q9Y5Z4	Heme-binding protein 2 [OS=Homo sapiens]	0	61.533	49	9	129	9	205	22.9	4.63	369.38	9		non-structural extracellular;mitochondrion;other cytoplasmic organelle;other cell component	other molecular function	Pf04832	23593	ENSG00000051620	HEBP2	hsa:23593; Q96P57; Q9Y5Z4		Neutrophil degranulation	1	0	1.027	0.586984	0.929111	62.12	84.9	115.1	48.65	33.31	High	High	High	High	High	High	1
FALSE	High	Master Protein	P00736	Complement C1r subcomponent [OS=Homo sapiens]	0	126.49	46	23	129	21	705	80.1	6.21	333.9	23	protein metabolism;other metabolic processes;stress response;other biological processes	non-structural extracellular	other molecular function	Pf00084, Pf00089, Pf00431, Pf14670	715		C1R	A6NJQ8; hsa:715; P00736; Q68D77; Q8J012	Dengue-2 interactions with complement and coagulation cascades; Complement system in neuronal development and plasticity; Complement and coagulation cascades	Initial triggering of complement; Classical antibody-mediated complement activation; Regulation of Complement cascade	6	2	1.216	0.272422	0.770857	75.63	105	95	36.2	57.64	High	High	High	High	High	High	1
FALSE	High	Master Protein	Q08380	Galectin-3-binding protein [OS=Homo sapiens]	0	91.235	37	16	129	16	585	65.3	5.27	329.34	16	cell adhesion;stress response;transport;signal transduction	non-structural extracellular;other membranes;other cell component	other molecular function	Pf00530, Pf07707	3959	ENSG00000108679	LGALS3BP	hsa:3959; Q08380; Q7M4S0; Q9UCH8; Q9UCH9; Q9UCI0	Network map of SARS-CoV-2 signaling pathway; 11p11.2 copy number variation syndrome	Platelet degranulation	3	0	0.64	0.264024	0.762519	107.71	71.3	128.7	115.84	10.48	High	High	High	High	High	High	1
FALSE	High	Master Protein	P41222	Prostaglandin-H2 D-isomerase [OS=Homo sapiens]	0	63.492	54	7	128	7	190	21	7.8	418.76	7	other metabolic processes;transport;other biological processes	non-structural extracellular;other membranes;ER/Golgi;nucleus;other cell component	other molecular function	Pf00061	5730	ENSG00000107317	PTGDS	B2R727; hsa:5730; P41222; Q5SQ10; Q7M4P3; Q9UC22; Q9UCC9; Q9UCD9	Eicosanoid metabolism via cyclooxygenases (COX); Somatic sex determination; Mammalian disorder of sexual development; Prostaglandin and leukotriene metabolism in senescence ; Prostaglandin and leukotriene metabolism in senescence ; Omega-6-fatty acids in senescence; Prostaglandin synthesis and regulation	Synthesis of Prostaglandins (PG) and Thromboxanes (TX); Transcriptional regulation of testis differentiation	9	0	0.869	0.964919	0.998171	61.04	98.1	101.9	55.42	28.75	High	High	High	High	High	High	1
FALSE	High	Master Protein	Q8WWI1	LIM domain only protein 7 [OS=Homo sapiens]	0	138.628	27	35	128	35	1683	192.6	8.09	318.99	35	protein metabolism;other metabolic processes;other biological processes	plasma membrane;other membranes;cytosol;nucleus;other cell component	other molecular function	Pf00307, Pf00412, Pf00595, Pf15949	4008	ENSG00000136153	LMO7	E9PLH4; O15462; O95346; Q5TBK6; Q8WWI1; Q9UKC1; Q9UQM5; Q9Y6A7		Antigen processing: Ubiquitination & Proteasome degradation; Neddylation; Signaling by ALK fusions and activated point mutants	3	0	1.006	0.644431	0.941335	78.3	127.8	72.2	52.76	70.57	High	High	High	High	High	High	1
FALSE	High	Master Protein	O75489	NADH dehydrogenase [ubiquinone] iron-sulfur protein 3, mitochondrial [OS=Homo sapiens]	0	96.396	56	16	128	16	264	30.2	7.5	326.16	16	cell organization and biogenesis;other metabolic processes;transport;other biological processes	other membranes;mitochondrion;nucleus	transporter activity;other molecular function	Pf00329	4722	ENSG00000213619	NDUFS3	B2R9J1; B4DFM8; hsa:4722; O75489; Q9UNQ8	Electron transport chain: OXPHOS system in mitochondria; Nonalcoholic fatty liver disease; Oxidative phosphorylation	RHOG GTPase cycle; Complex I biogenesis; Mitochondrial protein degradation	7	0	0.66	0.3611	0.841189	57.24	83.4	116.6	46.45	8.49	High	High	High	High	High	High	1
FALSE	High	Master Protein	P06748	Nucleophosmin [OS=Homo sapiens]	0	92.709	50	11	127	11	294	32.6	4.78	410.85	11	cell cycle OR cell proliferation;cell organization and biogenesis;DNA metabolism;other metabolic processes;stress response;transport;signal transduction;other biological processes	cytosol;cytoskeleton;translational apparatus;nucleus;other cell component	enzyme regulator activity;translation activity;nucleic acid binding activity;other molecular function	Pf03066, Pf16276	4869	ENSG00000181163	NPM1	A8K3N7; B5BU00; D3DQL6; hsa:4869; P06748; P08693; Q12826; Q13440; Q13441; Q14115; Q5EU94; Q5EU95; Q5EU96; Q5EU97; Q5EU98; Q5EU99; Q6V962; Q8WTW5; Q96AT6; Q96DC4; Q96EA5; Q9BYG9; Q9UDJ7		TP53 regulates transcription of additional cell cycle genes whose exact role in the p53 pathway remain uncertain; PKR-mediated signaling; Nuclear import of Rev protein; Deposition of new CENPA-containing nucleosomes at the centromere; SUMOylation of transcription cofactors; ALK mutants bind TKIs; Signaling by ALK fusions and activated point mutants; TFAP2A acts as a transcriptional repressor duri…	10	0	0.904	0.922165	0.994751	71.06	92.7	107.3	25.58	17.36	High	High	High	High	High	High	1	Acetyl [N-Term]
FALSE	High	Master Protein	P33121	Long-chain-fatty-acid--CoA ligase 1 [OS=Homo sapiens]	0	101.255	40	24	127	24	698	77.9	7.15	276.81	24	other metabolic processes;transport;signal transduction;other biological processes	other membranes;mitochondrion;ER/Golgi;other cytoplasmic organelle	enzyme regulator activity;other molecular function	Pf00501	2180	ENSG00000151726	ACSL1	B7Z452; D3DP57; hsa:2180; P33121; P41215; Q8N8V7; Q8TA99	Fatty acid beta-oxidation; Fatty acid biosynthesis; Mitochondrial long chain fatty acid beta-oxidation; PPAR signaling pathway; Ferroptosis; Thermogenesis; Cholesterol metabolism with Bloch and Kandutsch-Russell pathways; Omega-3 / omega-6 fatty acid synthesis; Omega-9 fatty acid synthesis; Fatty acid transporters; Mitochondrial fatty acid oxidation disorders; Fatty acids and lipoproteins transpo…	PPARA activates gene expression; Synthesis of very long-chain fatty acyl-CoAs; alpha-linolenic acid (ALA) metabolism; Linoleic acid (LA) metabolism	17	0	0.738	0.538486	0.918359	83.07	78.3	121.7	58.11	43.41	High	High	High	High	High	High	1	Acetyl [N-Term]
FALSE	High	Master Protein	P41219	Peripherin [OS=Homo sapiens]	0	53.578	30	12	127	9	470	53.6	5.47	321.34	12		plasma membrane;other membranes;cytoskeleton;other cell component	other molecular function	Pf00038, Pf04732	5630	ENSG00000135406	PRPH	hsa:5630; P41219; Q8N577	Amyotrophic lateral sclerosis (ALS)		1	0	1.105	0.477464	0.900712	63.62	135	65	44.53	75.34	High	High	High	High	High	High	1
TRUE	High	Master Protein	P00387	NADH-cytochrome b5 reductase 3 [OS=Homo sapiens]	0	107.355	71	16	127	16	301	34.2	7.59	399.78	16	other metabolic processes;other biological processes	non-structural extracellular;other membranes;cytosol;mitochondrion;ER/Golgi;other cytoplasmic organelle;other cell component	other molecular function	Pf00175, Pf00970	1727	ENSG00000100243	CYB5R3	B1AHF2; B7Z7L3; hsa:1727; O75675; P00387; Q8TDL8; Q8WTS8; Q9UEN4; Q9UEN5; Q9UL55; Q9UL56	Oxidation by cytochrome P450	Phase I - Functionalization of compounds; Neutrophil degranulation; Vitamin C (ascorbate) metabolism	4	0	0.493	0.0480108	0.334445	60.2	75.6	124.4	18.93	51.02	High	High	High	High	High	High	1
FALSE	High	Master Protein	P16152	Carbonyl reductase [NADPH] 1 [OS=Homo sapiens]	0	84.79	69	14	126	11	277	30.4	8.32	360.58	14	other metabolic processes;other biological processes	cytosol	other molecular function	Pf00106	873	ENSG00000159228	CBR1	B2RBZ7; B4DFK7; hsa:873; P16152; Q3LHW8	Nuclear receptors meta-pathway; NRF2 pathway; Omega-6-fatty acids in senescence; Prostaglandin synthesis and regulation	Synthesis of Prostaglandins (PG) and Thromboxanes (TX)	5	3	1.145	0.350398	0.835935	71.75	116.7	83.3	12.9	62.53	High	High	High	High	High	High	1
FALSE	High	Master Protein	Q04837	Single-stranded DNA-binding protein, mitochondrial [OS=Homo sapiens]	0	62.558	50	7	125	7	148	17.2	9.6	342.71	7	cell organization and biogenesis;DNA metabolism;other metabolic processes;other biological processes	mitochondrion	nucleic acid binding activity;other molecular function	Pf00436	6742	ENSG00000106028; ENSG00000262771	SSBP1	hsa:6742; Q04837		Mitochondrial protein degradation; Transcriptional activation of mitochondrial biogenesis	2	0	0.876	0.987795	0.999898	84.86	118.1	81.9	40.12	83.2	High	High	High	High	High	High	1
TRUE	High	Master Protein	P27797	Calreticulin [OS=Homo sapiens]	0	127.746	67	19	125	19	417	48.1	4.44	360.85	19	cell organization and biogenesis;protein metabolism;other metabolic processes;stress response;transport;developmental processes;signal transduction;other biological processes	non-structural extracellular;extracellular matrix;plasma membrane;other membranes;cytosol;ER/Golgi;nucleus;other cytoplasmic organelle;other cell component	signal transduction activity or receptor binding;nucleic acid binding activity;other molecular function	Pf00262	811	ENSG00000179218	CALR	hsa:811; P27797; Q6IAT4; Q9UDG2	Androgen receptor signaling pathway; Complement system; Photodynamic therapy-induced unfolded protein response; VEGFA-VEGFR2 signaling; GDNF signaling; Calcium regulation in cardiac cells	ER-Phagosome pathway; Antigen Presentation: Folding, assembly and peptide loading of class I MHC; Scavenging by Class A Receptors; Assembly of Viral Components at the Budding Site; Scavenging by Class F Receptors; ATF6 (ATF6-alpha) activates chaperone genes; Calnexin/calreticulin cycle	13	0	0.355	0.00145848	0.0249308	77.05	49.6	150.4	43.2	37.61	High	High	High	High	High	High	1
FALSE	High	Master Protein	Q9UNZ2	NSFL1 cofactor p47 [OS=Homo sapiens]	0	105.373	63	16	124	16	370	40.5	5.1	348.81	16	cell cycle OR cell proliferation;cell organization and biogenesis;protein metabolism;other metabolic processes;other biological processes	cytosol;cytoskeleton;ER/Golgi;nucleus;other cell component	other molecular function	Pf00789, Pf08059, Pf14555	55968	ENSG00000088833	NSFL1C	A2A2L1; B2RD74; hsa:55968; Q5JXA4; Q5JXA5; Q7Z533; Q9H102; Q9NVL9; Q9UI06; Q9UNZ2	Alstrom syndrome	RHOH GTPase cycle	2	0	0.933	0.835092	0.980077	61.73	100.7	99.3	21.32	45.44	High	High	High	High	High	High	1
FALSE	High	Master Protein	Q99757	Thioredoxin, mitochondrial [OS=Homo sapiens]	0	39.689	37	5	123	5	166	18.4	8.29	394.81	5	stress response;other biological processes	mitochondrion;nucleus;other cell component	other molecular function	Pf00085	25828	ENSG00000100348	TXN2	hsa:25828; Q5JZA0; Q6FH60; Q99757; Q9UH29	Oxidative stress response	Detoxification of Reactive Oxygen Species; Degradation of cysteine and homocysteine	3	0	0.833	0.849059	0.984487	77.25	110.6	89.4	49.01	55.57	High	High	High	High	High	High	1
FALSE	High	Master Protein	Q9NVS9	Pyridoxine-5'-phosphate oxidase [OS=Homo sapiens]	0	122.001	48	13	123	13	261	30	7.06	333.66	13	other metabolic processes	cytosol	other molecular function	Pf01243, Pf10590	55163	ENSG00000108439	PNPO	B4E0V0; B4E152; B4E1D7; D3DTT9; hsa:55163; Q9NVS9	Selenium micronutrient network; Vitamin B6-dependent and responsive disorders	Vitamin B6 activation to pyridoxal phosphate	3	0	1.025	0.591317	0.929836	64.05	113.7	86.3	47.02	39.24	High	High	High	High	High	High	1
FALSE	High	Master Protein	P14314	Glucosidase 2 subunit beta [OS=Homo sapiens]	0	112.363	44	16	123	16	528	59.4	4.41	362.09	16	protein metabolism;other metabolic processes;developmental processes;signal transduction	ER/Golgi;other cell component	other molecular function	Pf12999, Pf13015, Pf13202	5589	ENSG00000130175	PRKCSH	A8K318; hsa:5589; P14314; Q96BU9; Q96D06; Q9P0W9		Regulation of Insulin-like Growth Factor (IGF) transport and uptake by Insulin-like Growth Factor Binding Proteins (IGFBPs); Post-translational protein phosphorylation; Advanced glycosylation endproduct receptor signaling; Maturation of spike protein; Calnexin/calreticulin cycle; Maturation of spike protein	7	0	0.543	0.0900252	0.478095	56.3	70	130	27.89	20.98	High	High	High	High	High	High	1
FALSE	High	Master Protein	Q9BX68	Adenosine 5'-monophosphoramidase HINT2 [OS=Homo sapiens]	0	69.787	58	6	122	6	163	17.2	9.16	378.27	6	other metabolic processes;other biological processes	other membranes;mitochondrion;other cell component	other molecular function	Pf01230	84681	ENSG00000137133	HINT2	hsa:84681; Q5TCW3; Q9BX68		RHOD GTPase cycle	1	0	0.832	0.844753	0.982551	64.89	105.5	94.5	36.31	65.21	High	High	High	High	High	High	1
FALSE	High	Master Protein	P54727	UV excision repair protein RAD23 homolog B [OS=Homo sapiens]	0	83.453	46	13	122	12	409	43.1	4.84	331.39	13	protein metabolism;DNA metabolism;other metabolic processes;stress response;developmental processes;other biological processes	cytosol;nucleus;other cell component	nucleic acid binding activity;other molecular function	Pf00240, Pf00627, Pf09280	5887	ENSG00000119318	RAD23B	B3KWK8; G5E9P0; hsa:5887; P54727; Q7Z5K8; Q8WUB0	Nucleotide excision repair; DNA repair pathways, full network; Nucleotide excision repair in xeroderma pigmentosum ; HDAC6 interactions in the central nervous system	Josephin domain DUBs; Formation of Incision Complex in GG-NER; DNA Damage Recognition in GG-NER; N-glycan trimming in the ER and Calnexin/Calreticulin cycle	8	1	0.958	0.763981	0.970903	55.32	108.6	91.4	28.82	42.81	High	High	High	High	High	High	1
FALSE	High	Master Protein	P05556	Integrin beta-1 [OS=Homo sapiens]	0	93.779	34	18	122	18	798	88.4	5.39	324.22	18	cell adhesion;cell cycle OR cell proliferation;cell organization and biogenesis;stress response;transport;developmental processes;signal transduction;other biological processes	plasma membrane;other membranes;other cytoplasmic organelle;other cell component	signal transduction activity or receptor binding;cytoskeletal activity;other molecular function	Pf00362, Pf07965, Pf07974, Pf08725, Pf17205, Pf18372	3688	ENSG00000150093	ITGB1	A8K6N2; D3DRX9; D3DRY3; D3DRY4; D3DRY5; hsa:3688; P05556; P78466; P78467; Q13089; Q13090; Q13091; Q13212; Q14622; Q14647; Q29RW2; Q7Z3V1; Q8WUM6	Integrin-mediated cell adhesion; Prolactin signaling pathway; Neural crest differentiation; Arrhythmogenic right ventricular cardiomyopathy; Pathogenic Escherichia coli infection; Primary focal segmental glomerulosclerosis (FSGS); Mammary gland development pathway - Embryonic development (Stage 1 of 4); Focal adhesion; Hepatocyte growth factor receptor signaling; RAC1/PAK1/p38/MMP2 pathway; TGF-b…	ECM proteoglycans; Immunoregulatory interactions between a Lymphoid and a non-Lymphoid cell; Potential therapeutics for SARS; RAC1 GTPase cycle; RHOG GTPase cycle; RHO GTPases Activate Formins; HCMV Early Events; RAC2 GTPase cycle; RAC3 GTPase cycle; Integrin cell surface interactions; GPER1 signaling; CHL1 interactions; Interleukin-4 and Interleukin-13 signaling; Signal transduction by L1; Synde…	58	0	0.743	0.601049	0.93383	54.36	85.9	114.1	22.17	31.94	High	High	High	High	High	High	1
FALSE	High	Master Protein	P52907	F-actin-capping protein subunit alpha-1 [OS=Homo sapiens]	0	80.871	64	12	122	10	286	32.9	5.69	377.69	12	cell organization and biogenesis	non-structural extracellular;cytosol;cytoskeleton;other cell component	cytoskeletal activity	Pf01267	829	ENSG00000116489	CAPZA1	hsa:829; P52907; Q53FQ6; Q6FHD5		COPI-mediated anterograde transport; Sensory processing of sound by inner hair cells of the cochlea; MHC class II antigen presentation; HSP90 chaperone cycle for steroid hormone receptors (SHR) in the presence of ligand; COPI-independent Golgi-to-ER retrograde traffic; Gene and protein expression by JAK-STAT signaling after Interleukin-12 stimulation; Factors involved in megakaryocyte development…	8	0	1.128	0.433048	0.888186	66.92	99.7	100.3	47.38	46.61	High	High	High	High	High	High	1
FALSE	High	Master Protein	P31943	Heterogeneous nuclear ribonucleoprotein H [OS=Homo sapiens]	0	87.753	46	13	122	7	449	49.2	6.3	286.06	13	RNA metabolism OR transcription;other metabolic processes;other biological processes	cytosol;nucleus;other cell component	nucleic acid binding activity;other molecular function	Pf00076, Pf08080	3187	ENSG00000169045; ENSG00000284254	HNRNPH1	B3KW86; D3DWQ2; P31943; Q6IBM4	MECP2 and associated Rett syndrome; mRNA processing; Inhibition of exosome biogenesis and secretion by Manumycin A in CRPC cells	mRNA Splicing - Major Pathway; FGFR2 alternative splicing; Processing of Capped Intron-Containing Pre-mRNA	6	6	1.181	0.300725	0.796317	66.47	111.2	88.8	25.57	55.29	High	High	High	High	High	High	1
FALSE	High	Master Protein	Q86VB7	Scavenger receptor cysteine-rich type 1 protein M130 [OS=Homo sapiens]	0	167.553	34	24	122	24	1156	125.4	5.95	342	24	stress response;transport	non-structural extracellular;plasma membrane;other membranes;cytosol	other molecular function	Pf00530	9332	ENSG00000177575	CD163	C9JIG2; hsa:9332; Q07898; Q07899; Q07900; Q07901; Q2VLH7; Q86VB7	Macrophage markers	Scavenging of heme from plasma; CD163 mediating an anti-inflammatory response	3	0	1.499	0.0612176	0.379906	93.25	96.7	103.3	94.92	50.85	High	High	High	High	High	High	1
FALSE	High	Master Protein	Q9NRX4	14 kDa phosphohistidine phosphatase [OS=Homo sapiens]	0	80.257	61	7	121	7	125	13.8	6.07	416.03	7	cell organization and biogenesis;protein metabolism;other metabolic processes;other biological processes	plasma membrane;other membranes;cytosol;nucleus;other cell component	cytoskeletal activity;other molecular function	Pf05005	29085	ENSG00000054148	PHPT1	B1AMX0; B1AMX1; hsa:29085; Q9H0Y3; Q9NRX4			0	0	0.956	0.770692	0.972098	72.79	92	108	35.88	39.39	High	High	High	High	High	High	1
FALSE	High	Master Protein	P05976	Myosin light chain 1/3, skeletal muscle isoform [OS=Homo sapiens]	0	28.182	38	6	121	4	194	21.1	5.03	275.06	6	other biological processes	cytosol;cytoskeleton	other molecular function		4632	ENSG00000168530	MYL1	B2R4N6; B2R4T6; hsa:4632; P05976; P06741; Q6IBD5	Endothelin pathways; Physico-chemical features and toxicity-associated pathways; Striated muscle contraction pathway; Airway smooth muscle cell contraction; Regulation of actin cytoskeleton; G13 signaling pathway	Striated Muscle Contraction	7	0	1.328	0.14802	0.629045	86.68	99.4	100.6	39.49	38.82	High	High	High	High	High	High	1
FALSE	High	Master Protein	Q9NX63	MICOS complex subunit MIC19 [OS=Homo sapiens]	0	102.239	55	17	121	17	227	26.1	8.28	336.62	17	cell organization and biogenesis	other membranes;mitochondrion;nucleus	other molecular function	Pf05300	54927	ENSG00000106554	CHCHD3	hsa:54927; Q9NX63		Mitochondrial protein import; Cristae formation	2	0	1.39	0.10851	0.536109	68.73	121.1	78.9	30.3	54.14	High	High	High	High	High	High	1
FALSE	High	Master Protein	P02753	Retinol-binding protein 4 [OS=Homo sapiens]	0	67.172	60	8	121	8	201	23	6.07	362.55	8	other metabolic processes;transport;developmental processes;other biological processes	non-structural extracellular	transporter activity;other molecular function	Pf00061	5950	ENSG00000138207	RBP4	D3DR38; hsa:5950; O43478; O43479; P02753; Q5VY24; Q8WWA3; Q9P178	Sterol regulatory element-binding proteins (SREBP) signaling; Vitamin A and carotenoid metabolism	Retinoid metabolism and transport; The canonical retinoid cycle in rods (twilight vision); Retinoid cycle disease events; Retinoid metabolism disease events	6	0	1.846	0.00925919	0.114736	70.83	123.6	76.4	42.22	51.34	High	High	High	High	High	High	1
FALSE	High	Master Protein	Q15843	NEDD8 [OS=Homo sapiens]	0	26.14	46	4	120	4	81	9.1	8.43	233.55	4	protein metabolism;other metabolic processes;other biological processes	cytosol;nucleus	other molecular function	Pf00240	4738	ENSG00000129559; ENSG00000285246	NEDD8	hsa:4738; Q15843; Q3SXN8; Q6LES6	EGF/EGFR signaling pathway; 2q37 copy number variation syndrome	TGF-beta receptor signaling activates SMADs; UCH proteinases; Neddylation; Cargo recognition for clathrin-mediated endocytosis; Iron uptake and transport	7	0	0.71	0.452706	0.898224	40.28	105.8	94.2	32.19	41.44	High	High	High	High	High	High	1
TRUE	High	Master Protein	P0DJI9	Serum amyloid A-2 protein [OS=Homo sapiens]	0	46.334	54	6	120	3	122	13.5	9.14	306.33	6	stress response	non-structural extracellular		Pf00277	6289	ENSG00000134339	SAA2	G3XAK9; hsa:6289; P02735; P02736; P02737; P0DJI9; Q16730; Q16834; Q16835; Q16879; Q3KRB3; Q6FG67; Q96QN0; Q9UCK9; Q9UCL0	Selenium micronutrient network; Vitamin B12 metabolism; Folate metabolism; Network map of SARS-CoV-2 signaling pathway		4	0	0.314	0.000339807	0.00722846	91.66	62	138	100.79	79.05	High	High	High	High	High	High	1
FALSE	High	Master Protein	O43678	NADH dehydrogenase [ubiquinone] 1 alpha subcomplex subunit 2 [OS=Homo sapiens]	0	31.307	59	7	119	7	99	10.9	9.57	322.46	7	cell organization and biogenesis;other metabolic processes;transport;developmental processes	other membranes;mitochondrion	transporter activity	Pf05047	4695	ENSG00000131495	NDUFA2	D6RJD6; hsa:4695; O43678; Q6IAY8	Electron transport chain: OXPHOS system in mitochondria; Nonalcoholic fatty liver disease; Oxidative phosphorylation	Complex I biogenesis; Mitochondrial protein degradation	6	0	0.842	0.879318	0.989685	69.22	106.5	93.5	30.85	60.72	High	High	High	High	High	High	1
FALSE	High	Master Protein	O95810	Caveolae-associated protein 2 [OS=Homo sapiens]	0	107.092	55	16	119	16	425	47.1	5.21	340.87	16	cell organization and biogenesis	plasma membrane;other membranes;cytosol;nucleus;other cell component	other molecular function	Pf15237	8436	ENSG00000168497	CAVIN2	hsa:8436; O95810	Glucocorticoid receptor pathway; Nuclear receptors meta-pathway		2	0	1.002	0.648264	0.94247	66.43	106.7	93.3	49.11	25.2	High	High	High	High	High	High	1
FALSE	High	Master Protein	Q13561	Dynactin subunit 2 [OS=Homo sapiens]	0	101.776	51	17	118	17	401	44.2	5.21	302.4	17	cell cycle OR cell proliferation;cell organization and biogenesis;transport;other biological processes	other membranes;cytosol;cytoskeleton;other cell component	cytoskeletal activity;other molecular function	Pf04912	10540	ENSG00000175203	DCTN2	B2RBK5; hsa:10540; Q13561; Q86YN2; Q9BW17	Vasopressin-regulated water reabsorption	MHC class II antigen presentation; HSP90 chaperone cycle for steroid hormone receptors (SHR) in the presence of ligand; Recruitment of NuMA to mitotic centrosomes; COPI-mediated anterograde transport; COPI-independent Golgi-to-ER retrograde traffic; Regulation of PLK1 Activity at G2/M Transition; Loss of Nlp from mitotic centrosomes; Recruitment of mitotic centrosome proteins and complexes; Ancho…	12	0	1.12	0.396226	0.869655	60.41	113	87	34.16	44.02	High	High	High	High	High	High	1
FALSE	High	Master Protein	Q9BZL4	Protein phosphatase 1 regulatory subunit 12C [OS=Homo sapiens]	0	128.032	47	27	118	27	782	84.8	5.57	344.61	27	signal transduction	cytoskeleton;other cell component	enzyme regulator activity;other molecular function	Pf12796, Pf15898	54776	ENSG00000125503	PPP1R12C	B4DME2; hsa:54776; Q59FK8; Q6ZPD1; Q7L8F7; Q96HW1; Q9BZL4; Q9H5H5; Q9NT00	Focal adhesion		1	0	1.163	0.344092	0.832823	60.85	130.9	69.1	34.28	43.62	High	High	High	High	High	High	1
FALSE	High	Master Protein	P02765	Alpha-2-HS-glycoprotein [OS=Homo sapiens]	0	77.687	35	6	117	6	367	39.3	5.72	428.83	6	stress response;transport;developmental processes;other biological processes	extracellular matrix;ER/Golgi;other cell component	enzyme regulator activity	Pf00031	197	ENSG00000145192	AHSG	A8K9N6; B2R7G1; hsa:197; O14961; O14962; P02765; Q9P152		Neutrophil degranulation; Platelet degranulation ; Regulation of Insulin-like Growth Factor (IGF) transport and uptake by Insulin-like Growth Factor Binding Proteins (IGFBPs); Post-translational protein phosphorylation	4	0	0.812	0.779544	0.97229	88.85	87.4	112.6	32.69	70.66	High	High	High	High	High	High	1
FALSE	High	Master Protein	P31946	14-3-3 protein beta/alpha [OS=Homo sapiens]	0	77.188	68	15	117	8	246	28.1	4.83	266.16	15	signal transduction;other biological processes	other membranes;cytosol;other cytoplasmic organelle;other cell component	enzyme regulator activity;other molecular function	Pf00244	7529	ENSG00000166913	YWHAB	A8K9K2; E1P616; hsa:7529; P31946	Cell cycle; IL-3 signaling pathway; Myometrial relaxation and contraction pathways; Hepatitis B infection; Calcium regulation in cardiac cells; Sudden infant death syndrome (SIDS) susceptibility pathways	TP53 Regulates Metabolic Genes; Translocation of SLC2A4 (GLUT4) to the plasma membrane; Signaling by BRAF and RAF1 fusions; Signaling by moderate kinase activity BRAF mutants; Paradoxical activation of RAF signaling by kinase inactive BRAF; Signaling downstream of RAS mutants; Signaling by RAF1 mutants; MAP2K and MAPK activation; Signaling by high-kinase activity BRAF mutants; Regulation of local…	33	0	0.699	0.487754	0.903802	48.42	76.8	123.2	29.52	14.84	High	High	High	High	High	High	1
TRUE	High	Master Protein	P00915	Carbonic anhydrase 1 [OS=Homo sapiens]	0	105.393	65	11	117	11	261	28.9	7.12	309.49	11	other metabolic processes	cytosol	other molecular function	Pf00194	759	ENSG00000133742	CA1	hsa:759; P00915		Gene and protein expression by JAK-STAT signaling after Interleukin-12 stimulation; Reversible hydration of carbon dioxide; Erythrocytes take up carbon dioxide and release oxygen; Erythrocytes take up oxygen and release carbon dioxide	4	0	2.2	0.00129195	0.0225885	134.06	85.3	114.7	137.31	64.57	High	High	High	High	High	High	1
FALSE	High	Master Protein	O15273	Telethonin [OS=Homo sapiens]	0	76.22	80	13	116	13	167	19	5.25	253.83	13	cell organization and biogenesis;stress response;developmental processes;other biological processes	cytosol;cytoskeleton	cytoskeletal activity;other molecular function	Pf09470	8557	ENSG00000173991	TCAP	hsa:8557; O15273; Q96L27	Striated muscle contraction pathway; 17q12 copy number variation syndrome; Cardiomyocyte signaling pathways converging on titin	Striated Muscle Contraction	4	0	0.904	0.911837	0.994751	69.39	96.8	103.2	34.75	52.84	High	High	High	High	High	High	1
FALSE	High	Master Protein	P31949	Protein S100-A11 [OS=Homo sapiens]	0	48.591	80	6	116	6	105	11.7	7.12	275.02	6	signal transduction;other biological processes	nucleus;other cell component	other molecular function	Pf00036, Pf01023	6282	ENSG00000163191	S100A11	hsa:6282; P31949; Q5VTK0		Neutrophil degranulation	1	0	1.146	0.353089	0.836472	56.86	110.7	89.3	40.03	38.36	High	High	High	High	High	High	1
FALSE	High	Master Protein	O14979	Heterogeneous nuclear ribonucleoprotein D-like [OS=Homo sapiens]	0	57.088	23	10	116	8	420	46.4	9.57	290.49	10	RNA metabolism OR transcription;other metabolic processes;other biological processes	cytosol;nucleus	nucleic acid binding activity	Pf00076	9987	ENSG00000152795	HNRNPDL	hsa:9987; O14979; Q6SPF2; Q7KZ74; Q7KZ75; Q96IM0; Q96S43		Gene and protein expression by JAK-STAT signaling after Interleukin-12 stimulation	1	0	0.64	0.329738	0.822029	78.94	71.5	128.5	56.24	49.87	High	High	High	High	High	High	1
FALSE	High	Master Protein	P49189	4-trimethylaminobutyraldehyde dehydrogenase [OS=Homo sapiens]	0	82.7	45	16	116	16	494	53.8	5.87	287.9	16	cell organization and biogenesis;other metabolic processes	cytosol;other cell component	other molecular function	Pf00171	223	ENSG00000143149	ALDH9A1	B2R6X1; B4DXY7; B9EKV4; hsa:223; P49189; Q5VV90; Q6LCL1; Q9NZT7	GABA receptor signaling; Fluoroacetic acid toxicity; Opioid receptor pathways	Carnitine synthesis	4	0	0.549	0.0979246	0.504007	61.42	80.5	119.5	41.48	22	High	High	High	High	High	High	1
FALSE	High	Master Protein	B9A064	Immunoglobulin lambda-like polypeptide 5 [OS=Homo sapiens]	0	59.885	41	6	116	3	214	23	8.84	355.31	6	other biological processes	other cell component	other molecular function	Pf07654	100423062	ENSG00000254709	IGLL5	B9A064; hsa:100423062			0	3	1.759	0.0150099	0.15703	87.11	132.5	67.5	57.07	65.28	High	High	High	High	High	High	1
FALSE	High	Master Protein	P58546	Myotrophin [OS=Homo sapiens]	0	66.99	74	7	115	7	118	12.9	5.52	306.87	7	cell organization and biogenesis;other metabolic processes;developmental processes;other biological processes	cytosol;cytoskeleton;nucleus;other cell component	nucleic acid binding activity	Pf12796	136319	ENSG00000105887	MTPN	hsa:136319; P58546			0	0	0.841	0.873984	0.988397	61.44	109.2	90.8	31.88	39.52	High	High	High	High	High	High	1
FALSE	High	Master Protein	P10643	Complement component C7 [OS=Homo sapiens]	0	129.685	44	27	115	27	843	93.5	6.48	286.87	27	stress response;other biological processes	non-structural extracellular;plasma membrane;other membranes		Pf00057, Pf00084, Pf00090, Pf01823, Pf18434, Pf21284, Pf21330	730	ENSG00000112936	C7	A8K2T4; hsa:730; P10643; Q6P3T5; Q92489	Allograft rejection; Complement system; Dengue-2 interactions with complement and coagulation cascades; Cells and molecules involved in local acute inflammatory response ; Complement system in neuronal development and plasticity; Complement-mediated inflammation of pulmonary alveolus in COVID-19 (hypothetical pathway); Complement activation; Complement and coagulation cascades	Regulation of Complement cascade; Terminal pathway of complement	10	0	0.719	0.52576	0.91215	61.93	88.9	111.1	8.47	48.57	High	High	High	High	High	High	1
FALSE	High	Master Protein	P52566	Rho GDP-dissociation inhibitor 2 [OS=Homo sapiens]	0	79.293	66	10	115	10	201	23	5.21	328.5	10	signal transduction;other biological processes	other membranes;cytosol;cytoskeleton;other cell component	enzyme regulator activity;other molecular function	Pf02115	397	ENSG00000111348	ARHGDIB	B5BU79; hsa:397; P52566	Fas ligand pathway and stress induction of heat shock proteins; Vasopressin-regulated water reabsorption; G13 signaling pathway	RHOA GTPase cycle; CDC42 GTPase cycle; RAC1 GTPase cycle; RHOG GTPase cycle; RAC3 GTPase cycle; RHOH GTPase cycle	9	0	1.229	0.240653	0.733647	74.46	98.9	101.1	33.86	36.76	High	High	High	High	High	High	1
FALSE	High	Master Protein	P31150	Rab GDP dissociation inhibitor alpha [OS=Homo sapiens]	0	142.176	56	22	115	14	447	50.6	5.14	333.46	22	cell organization and biogenesis;transport;signal transduction;other biological processes	cytosol;ER/Golgi;other cell component	enzyme regulator activity;other molecular function	Pf00996	2664	ENSG00000203879	GDI1	hsa:2664; P31150; P50394; Q6FG50; Q7Z2G6; Q7Z2G9; Q7Z2H5; Q7Z2I6	Ciliary landscape; Airway smooth muscle cell contraction	RAB GEFs exchange GTP for GDP on RABs	3	8	0.591	0.160745	0.651783	62.81	68.8	131.2	27.17	23.08	High	High	High	High	High	High	1
FALSE	High	Master Protein	P27348	14-3-3 protein theta [OS=Homo sapiens]	0	84.684	66	16	114	11	245	27.7	4.78	276.01	16	signal transduction;other biological processes	cytosol;other cell component	other molecular function	Pf00244	10971	ENSG00000134308	YWHAQ	D6W4Z5; hsa:10971; P27348; Q567U5; Q5TZU8; Q9UP48	Cell cycle; Pathogenic Escherichia coli infection; Primary focal segmental glomerulosclerosis (FSGS); IL-3 signaling pathway; Myometrial relaxation and contraction pathways; Mechanoregulation and pathology of YAP/TAZ via Hippo and non-Hippo mechanisms; Leukocyte-intrinsic Hippo pathway functions; Hepatitis B infection; Opioid receptor pathways; Calcium regulation in cardiac cells; Sudden infant d…	TP53 Regulates Metabolic Genes; Translocation of SLC2A4 (GLUT4) to the plasma membrane; Regulation of localization of FOXO transcription factors; Chk1/Chk2(Cds1) mediated inactivation of Cyclin B:Cdk1 complex; RHO GTPases activate PKNs; SARS-CoV-1 targets host intracellular signalling and regulatory pathways; SARS-CoV-2 targets host intracellular signalling and regulatory pathways; Activation of …	19	1	0.695	0.408088	0.875316	57.14	81.8	118.2	33.31	4.04	High	High	High	High	High	High	1
FALSE	High	Master Protein	P35527	Keratin, type I cytoskeletal 9 [OS=Homo sapiens]	0	154.113	59	27	114	26	623	62	5.24	309.6	27	cell organization and biogenesis;other biological processes	cytosol;cytoskeleton	cytoskeletal activity	Pf00038	3857	ENSG00000171403	KRT9	hsa:3857; O00109; P35527; Q0IJ47; Q14665		Formation of the cornified envelope	2	1	1.118	0.400425	0.87068	100.43	123.1	76.9	50.47	100.26	High	High	High	High	High	High	1
TRUE	High	Master Protein	P55083	Microfibril-associated glycoprotein 4 [OS=Homo sapiens]	0	65.705	29	3	114	3	255	28.6	5.63	426.08	3	cell adhesion;cell organization and biogenesis;other biological processes	non-structural extracellular;extracellular matrix		Pf00147	4239	ENSG00000166482	MFAP4	A8KAJ1; A8MVM2; B4E317; hsa:4239; P55083; Q6P680		Molecules associated with elastic fibres	1	0	0.387	0.00362928	0.0537857	99.79	49.5	150.5	16.71	80.09	High	High	High	High	High	High	1
FALSE	High	Master Protein	Q92945	Far upstream element-binding protein 2 [OS=Homo sapiens]	0	107.132	42	22	113	19	711	73.1	7.3	325.88	22	protein metabolism;RNA metabolism OR transcription;other metabolic processes;transport;other biological processes	cytosol;nucleus;other cell component	nucleic acid binding activity;other molecular function	Pf00013, Pf09005	8570	ENSG00000088247	KHSRP	hsa:8570; O00301; Q59EZ9; Q5U4P6; Q92945; Q9UNT5; Q9UQH5	Pre-implantation embryo	ATF4 activates genes in response to endoplasmic reticulum stress; KSRP (KHSRP) binds and destabilizes mRNA	3	3	0.947	0.790237	0.97229	70	101	99	35.47	43.27	High	High	High	High	High	High	1
FALSE	High	Master Protein	P30622	CAP-Gly domain-containing linker protein 1 [OS=Homo sapiens]	0	105.609	27	27	113	27	1438	162.1	5.36	285.86	27	cell cycle OR cell proliferation;cell organization and biogenesis;other biological processes	other membranes;cytosol;cytoskeleton;nucleus;other cell component	cytoskeletal activity;other molecular function	Pf01302, Pf16641	6249	ENSG00000130779	CLIP1	A0AVD3; hsa:6249; P30622; Q17RS4; Q29RG0	Microtubule cytoskeleton regulation; PAFAH1B1 copy number variation	RHO GTPases Activate Formins; Separation of Sister Chromatids; Resolution of Sister Chromatid Cohesion; RHO GTPases activate IQGAPs; EML4 and NUDC in mitotic spindle formation; Amplification of signal from unattached kinetochores via a MAD2 inhibitory signal	9	0	0.985	0.712684	0.960029	63.6	121.1	78.9	42.95	61.93	High	High	High	High	High	High	1
FALSE	High	Master Protein	P45880	Voltage-dependent anion-selective channel protein 2 [OS=Homo sapiens]	0	62.759	53	11	112	11	294	31.5	7.56	306.51	11	cell organization and biogenesis;transport;signal transduction;other biological processes	other membranes;cytoskeleton;mitochondrion;other cell component	transporter activity;other molecular function	Pf01459	7417	ENSG00000165637	VDAC2	hsa:7417; P45880; Q5VWK1; Q5VWK3; Q6IB40; Q7L3J5; Q9BWK8; Q9Y5I6	Alzheimer's disease and miRNA effects; Ferroptosis; Alzheimer's disease	Ub-specific processing proteases; Mitochondrial calcium ion transport	5	0	0.904	0.924688	0.994839	68.68	91.6	108.4	56.95	24.11	High	High	High	High	High	High	1
FALSE	High	Master Protein	Q96AE4	Far upstream element-binding protein 1 [OS=Homo sapiens]	0	97.246	37	21	112	16	644	67.5	7.61	280.44	21	other biological processes	nucleus;other cell component	nucleic acid binding activity	Pf00013, Pf09005	8880	ENSG00000162613	FUBP1	hsa:8880; Q12828; Q96AE4			0	2	0.777	0.666023	0.947326	66.83	98.9	101.1	43.2	53.98	High	High	High	High	High	High	1
FALSE	High	Master Protein	P42704	Leucine-rich PPR motif-containing protein, mitochondrial [OS=Homo sapiens]	0	152.331	37	37	112	37	1394	157.8	6.13	264.27	37	RNA metabolism OR transcription;other metabolic processes;transport;other biological processes	other membranes;cytoskeleton;mitochondrion;nucleus;other cell component	cytoskeletal activity;nucleic acid binding activity;other molecular function	Pf01535	10128	ENSG00000138095	LRPPRC	A0PJE3; A8K1V1; hsa:10128; P42704; Q53PC0; Q53QN7; Q6ZUD8; Q7Z7A6; Q96D84	Ciliary landscape	Respiratory electron transport; TP53 Regulates Metabolic Genes; Cytoprotection by HMOX1; Mitochondrial RNA degradation	5	0	0.622	0.294551	0.788937	78.56	75.1	124.9	78.17	48.83	Peak Found	High	High	High	High	High	1
TRUE	High	Master Protein	P69891	Hemoglobin subunit gamma-1 [OS=Homo sapiens]	0	40.47	65	8	112	6	147	16.1	7.2	266.81	8	other metabolic processes;transport;other biological processes	cytosol;other cell component	other molecular function	Pf00042	736917		HBG1	P02096; P61920; ptr:736917			0	1	22.429	1e-17	3.03889e-16	90.57	197.2	2.8	88.2	124.87	High	High	Not Found	High	Peak Found	Peak Found	1
FALSE	High	Master Protein	P07203	Glutathione peroxidase 1 [OS=Homo sapiens]	0	80.438	84	13	111	13	203	22.1	6.55	286.6	13	cell cycle OR cell proliferation;cell organization and biogenesis;other metabolic processes;stress response;developmental processes;signal transduction;other biological processes	cytosol;mitochondrion;other cell component	other molecular function	Pf00255	2876	ENSG00000233276	GPX1	E9PAS1; hsa:2876; P07203; Q7Z5H1; Q9BW12	Glutathione metabolism; Selenium micronutrient network; Folate metabolism; Amyotrophic lateral sclerosis (ALS); Trans-sulfuration, one-carbon metabolism and related pathways; Selenium metabolism and selenoproteins; Physico-chemical features and toxicity-associated pathways; VEGFA-VEGFR2 signaling; One-carbon metabolism and related pathways; TYROBP causal network in microglia; Oxidative stress res…	Detoxification of Reactive Oxygen Species; Synthesis of 15-eicosatetraenoic acid derivatives; Synthesis of 12-eicosatetraenoic acid derivatives; Synthesis of 5-eicosatetraenoic acids	18	0	1.047	0.541471	0.919526	65.36	116.5	83.5	25.81	65.08	High	High	High	High	High	High	1
FALSE	High	Master Protein	P13693	Translationally-controlled tumor protein [OS=Homo sapiens]	0	59.706	59	6	111	6	172	19.6	4.93	333.99	6	transport;other biological processes	non-structural extracellular;cytosol;cytoskeleton;nucleus;other cytoplasmic organelle;other cell component	other molecular function	Pf00838	7178	ENSG00000133112	TPT1	B2R7E5; hsa:7178; P13693; Q6YLS2; Q7Z4J4; Q8TBK7; Q96EE2; Q9UC70			0	0	1.141	0.359537	0.841189	75.17	116.1	83.9	46.9	46.18	High	High	High	High	High	High	1
FALSE	High	Master Protein	Q14195	Dihydropyrimidinase-related protein 3 [OS=Homo sapiens]	0	110.86	49	18	111	15	570	61.9	6.49	270.5	18	cell organization and biogenesis;stress response;developmental processes;other biological processes	non-structural extracellular;cytosol;cytoskeleton;ER/Golgi;other cell component	cytoskeletal activity;other molecular function	Pf01979	1809	ENSG00000113657	DPYSL3	B3SXQ8; hsa:1809; Q14195; Q93012		CRMPs in Sema3A signaling	1	0	0.635	0.296971	0.790862	53.22	73.6	126.4	16.82	35.61	High	High	High	High	High	High	1
FALSE	High	Master Protein	Q7Z406	Myosin-14 [OS=Homo sapiens]	0	105.981	16	26	111	17	1995	227.7	5.6	304.27	26	cell organization and biogenesis;other biological processes	cytosol;cytoskeleton;other cell component	cytoskeletal activity;other molecular function	Pf00063, Pf01576, Pf02736	79784	ENSG00000105357	MYH14	B0I1S2; C3TTN4; hsa:79784; Q5CZ75; Q6XYE4; Q76B62; Q7Z406; Q8WV23; Q96I22; Q9BT27; Q9BW35; Q9H882		RHO GTPases activate CIT; RHO GTPases activate PKNs; RHO GTPases activate PAKs; EPHA-mediated growth cone collapse; Sema4D induced cell migration and growth-cone collapse; RHO GTPases Activate ROCKs	6	0	1.283	0.221344	0.706862	55.57	109.7	90.3	66.98	26.61	High	High	High	High	High	High	1
FALSE	High	Master Protein	Q9Y696	Chloride intracellular channel protein 4 [OS=Homo sapiens]	0	94.154	61	16	111	15	253	28.8	5.59	327.07	16	transport;developmental processes;other biological processes	plasma membrane;other membranes;cytosol;cytoskeleton;mitochondrion;nucleus;other cell component	transporter activity	Pf13409	25932	ENSG00000169504	CLIC4	hsa:25932; Q9UFW9; Q9UQJ6; Q9Y696			0	1	0.551	0.11168	0.544741	51.65	67.9	132.1	18.38	15.48	High	High	High	High	High	High	1
FALSE	High	Master Protein	P05156	Complement factor I [OS=Homo sapiens]	0	108.448	31	18	110	18	583	65.7	7.5	303.09	18	protein metabolism;stress response;other biological processes	non-structural extracellular;other membranes	other molecular function	Pf00057, Pf00089, Pf00530, Pf21286, Pf21287	3426	ENSG00000205403	CFI	hsa:3426; O60442; P05156	Complement system; Dengue-2 interactions with complement and coagulation cascades; Complement system in neuronal development and plasticity; Network map of SARS-CoV-2 signaling pathway; Complement and coagulation cascades	Regulation of Complement cascade	6	0	0.939	0.818136	0.976419	57.07	95.5	104.5	3.76	47.84	High	High	High	High	High	High	1
FALSE	High	Master Protein	P04196	Histidine-rich glycoprotein [OS=Homo sapiens]	0	96.097	30	14	110	14	525	59.5	7.5	280.85	14	stress response;transport;developmental processes;other biological processes	non-structural extracellular;plasma membrane;other membranes;other cytoplasmic organelle;other cell component	signal transduction activity or receptor binding;enzyme regulator activity;other molecular function	Pf00031	3273	ENSG00000113905	HRG	B9EK35; D3DNU7; hsa:3273; P04196		Platelet degranulation ; Dissolution of Fibrin Clot	2	0	0.596	0.17168	0.667374	105	81.8	118.2	34.57	37.36	High	High	High	High	High	High	1
FALSE	High	Master Protein	Q5VWP3	Muscular LMNA-interacting protein [OS=Homo sapiens]	0	136.666	67	19	109	19	458	50.4	6.38	340.03	19											0	0	0.87	0.968578	0.998908	85.53	86.5	113.5	69.26	35.57	High	High	High	High	High	High	1
FALSE	High	Master Protein	P13671	Complement component C6 [OS=Homo sapiens]	0	107.729	38	23	109	23	934	104.7	6.76	264.82	23	stress response;developmental processes;other biological processes	non-structural extracellular;plasma membrane;other membranes		Pf00057, Pf00084, Pf00090, Pf01823, Pf07648, Pf21195	729	ENSG00000039537	C6	hsa:729; P13671	Allograft rejection; Complement system; Dengue-2 interactions with complement and coagulation cascades; Cells and molecules involved in local acute inflammatory response ; Complement system in neuronal development and plasticity; Complement-mediated inflammation of pulmonary alveolus in COVID-19 (hypothetical pathway); Complement activation; Complement and coagulation cascades	Regulation of Complement cascade; Terminal pathway of complement	10	0	0.858	0.95757	0.996892	60.58	84.5	115.5	26.62	44.73	High	High	High	High	High	High	1
FALSE	High	Master Protein	O95202	Mitochondrial proton/calcium exchanger protein [OS=Homo sapiens]	0	109.742	32	18	109	18	739	83.3	6.7	329.9	18	cell organization and biogenesis;transport;other biological processes	other membranes;mitochondrion	transporter activity;translation activity;other molecular function	Pf07766	3954	ENSG00000168924	LETM1	B4DED2; hsa:3954; O95202; Q9UF65	4p16.3 copy number variation	RHOG GTPase cycle; Mitochondrial calcium ion transport	3	0	0.71	0.467315	0.898926	88.02	106.1	93.9	38.77	56.42	High	High	High	High	High	High	1
FALSE	High	Master Protein	P50395	Rab GDP dissociation inhibitor beta [OS=Homo sapiens]	0	119.849	56	21	109	13	445	50.6	6.47	292.94	21	transport;signal transduction;other biological processes	non-structural extracellular;other membranes;cytosol;ER/Golgi;other cytoplasmic organelle;other cell component	enzyme regulator activity;other molecular function	Pf00996	2665	ENSG00000057608	GDI2	hsa:2665; O43928; P50395; Q5SX88; Q9UQM6		Neutrophil degranulation; RAB GEFs exchange GTP for GDP on RABs	2	0	0.669	0.399615	0.87068	45.27	83.3	116.7	8.8	20.01	High	High	High	High	High	High	1
FALSE	High	Master Protein	P00352	Aldehyde dehydrogenase 1A1 [OS=Homo sapiens]	0	113.015	55	21	109	18	501	54.8	6.73	303.95	21	other metabolic processes;other biological processes	cytosol;other cell component	enzyme regulator activity;other molecular function	Pf00171	216	ENSG00000165092	ALDH1A1	hsa:216; O00768; P00352; Q5SYR1	Folate-alcohol and cancer pathway hypotheses; Fatty acid omega-oxidation; Dopaminergic neurogenesis; Amino acid metabolism; Ethanol effects on histone modifications; Disorders of fructose metabolism; Omega-6-fatty acids in senescence; Vitamin A and carotenoid metabolism	RA biosynthesis pathway; Ethanol oxidation; Fructose catabolism	11	0	0.596	0.229855	0.717085	65.21	89.8	110.2	29.83	62.73	High	High	High	High	High	High	1
FALSE	High	Master Protein	P63220	40S ribosomal protein S21 [OS=Homo sapiens]	0	69.229	64	6	108	6	83	9.1	8.5	302.76	6	protein metabolism;RNA metabolism OR transcription;other metabolic processes	cytosol;ER/Golgi;translational apparatus;nucleus;other cell component	other molecular function	Pf01249	6227	ENSG00000171858	RPS21	hsa:6227; P35265; P63220	Cytoplasmic ribosomal proteins	Regulation of expression of SLITs and ROBOs; L13a-mediated translational silencing of Ceruloplasmin expression; Formation of a pool of free 40S subunits; GTP hydrolysis and joining of the 60S ribosomal subunit; Major pathway of rRNA processing in the nucleolus and cytosol; Nonsense Mediated Decay (NMD) enhanced by the Exon Junction Complex (EJC); SRP-dependent cotranslational protein targeting to…	19	0	0.904	0.923323	0.994751	69.01	105.8	94.2	47.54	49.26	High	High	High	High	High	High	1	Acetyl [N-Term]
FALSE	High	Master Protein	Q9UJY1	Heat shock protein beta-8 [OS=Homo sapiens]	0	55.543	53	10	108	10	196	21.6	5.12	285.55	10	stress response;other biological processes	cytosol;nucleus;other cell component	other molecular function	Pf00011	26353	ENSG00000152137	HSPB8	B2R6A6; hsa:26353; Q6FIH3; Q9UJY1; Q9UKS3	IL-18 signaling pathway; Intracellular trafficking proteins involved in CMT neuropathy	HSF1-dependent transactivation	3	0	0.774	0.654099	0.943477	67.71	84.7	115.3	33.86	37.03	High	High	High	High	High	High	1
FALSE	High	Master Protein	P35573	Glycogen debranching enzyme [OS=Homo sapiens]	0	158.913	37	34	108	34	1532	174.7	6.76	280.75	34	other metabolic processes;other biological processes	non-structural extracellular;cytosol;ER/Golgi;nucleus;other cell component	other molecular function	Pf06202, Pf14699, Pf14701, Pf14702	178	ENSG00000162688	AGL	A6NCX7; A6NEK2; D3DT51; hsa:178; P35573; P78354; P78544; Q59H92; Q6AZ90; Q9UF08	Glycogen synthesis and degradation	Neutrophil degranulation; Glycogen breakdown (glycogenolysis)	3	0	0.578	0.211648	0.700895	77.88	74.7	125.3	71.07	61.15	High	High	High	High	High	High	1
FALSE	High	Master Protein	Q16134	Electron transfer flavoprotein-ubiquinone oxidoreductase, mitochondrial [OS=Homo sapiens]	0	84.403	42	19	108	19	617	68.5	7.55	259.49	19	other metabolic processes;stress response	other membranes;mitochondrion	other molecular function	Pf01946, Pf05187, Pf21162	2110	ENSG00000171503	ETFDH	B4E3R9; hsa:2110; J3KND9; Q16134; Q7Z347	Riboflavin and CoQ disorders	Respiratory electron transport	2	0	0.584	0.150541	0.631731	83.32	79.1	120.9	61.99	59.46	High	High	High	High	High	High	1
FALSE	High	Master Protein	P50990	T-complex protein 1 subunit theta [OS=Homo sapiens]	0	104.248	50	24	107	24	548	59.6	5.6	239.07	24	protein metabolism;other metabolic processes;other biological processes	non-structural extracellular;cytosol;cytoskeleton;nucleus;other cytoplasmic organelle;other cell component	other molecular function	Pf00118	10694	ENSG00000156261; ENSG00000291533	CCT8	A6NN54; B4DEM7; B4DQH4; hsa:10694; P50990; Q4VBP8	16p11.2 proximal deletion syndrome	Association of TriC/CCT with target proteins during biosynthesis; Neutrophil degranulation; Formation of tubulin folding intermediates by CCT/TriC; BBSome-mediated cargo-targeting to cilium; Cooperation of PDCL (PhLP1) and TRiC/CCT in G-protein beta folding; Prefoldin mediated transfer of substrate to CCT/TriC; Folding of actin by CCT/TriC	8	0	0.726	0.535494	0.918359	57.48	81.2	118.8	49.76	21.31	High	High	High	High	High	High	1
FALSE	High	Master Protein	P51858	Hepatoma-derived growth factor [OS=Homo sapiens]	0	70.492	64	13	107	13	240	26.8	4.73	269.09	13	cell organization and biogenesis;signal transduction;other biological processes	nucleus;other cell component	signal transduction activity or receptor binding;cytoskeletal activity;nucleic acid binding activity;other molecular function	Pf00855	3068	ENSG00000143321	HDGF	B3KU21; D3DVC9; P51858; Q5SZ07; Q5SZ08; Q5SZ09	IL-18 signaling pathway	XBP1(S) activates chaperone genes	2	0	0.683	0.40701	0.875316	72.86	67.5	132.5	67.17	32.71	High	High	High	High	High	High	1
TRUE	High	Master Protein	Q06828	Fibromodulin [OS=Homo sapiens]	0	80.462	30	8	107	8	376	43.2	6.04	338.61	8	cell organization and biogenesis;signal transduction	extracellular matrix;ER/Golgi;other cytoplasmic organelle		Pf00560, Pf01462, Pf13516, Pf13855	2331	ENSG00000122176	FMOD	hsa:2331; Q06828; Q15331; Q8IV47	GDNF signaling	ECM proteoglycans; Keratan sulfate biosynthesis; Keratan sulfate degradation; Defective CHST6 causes MCDC1; Defective ST3GAL3 causes MCT12 and EIEE15; Defective B4GALT1 causes B4GALT1-CDG (CDG-2d)	7	0	0.488	0.036865	0.281749	118.8	67.3	132.7	39.61	97.91	High	High	High	High	High	High	1
FALSE	High	Master Protein	P30040	Endoplasmic reticulum resident protein 29 [OS=Homo sapiens]	0	58.687	51	13	106	13	261	29	7.31	260.44	13	protein metabolism;other metabolic processes;transport;other biological processes	ER/Golgi;other cell component	other molecular function	Pf07749, Pf07912	10961	ENSG00000089248	ERP29	C9J183; hsa:10961; P30040; Q3MJC3; Q6FHT4			0	0	0.899	0.938666	0.995934	63.74	112.3	87.7	33.18	45.09	High	High	High	High	High	High	1
FALSE	High	Master Protein	P15531	Nucleoside diphosphate kinase A [OS=Homo sapiens]	0	54.339	65	8	106	4	152	17.1	6.19	259.87	8	DNA metabolism;other metabolic processes;transport;developmental processes;other biological processes	plasma membrane;other membranes;cytosol;nucleus;other cell component	translation activity;kinase activity;other molecular function	Pf00334	4830	ENSG00000239672	NME1	hsa:4830; P15531; Q6FGK3; Q86XQ2; Q9UDJ6	Pyrimidine metabolism	Interconversion of nucleotide di- and triphosphates; Azathioprine ADME; Ribavirin ADME	4	5	1.034	0.571362	0.928723	78.59	125.2	74.8	19.81	69.73	High	High	High	High	High	High	1
FALSE	High	Master Protein	P21399	Cytoplasmic aconitate hydratase [OS=Homo sapiens]	0	86.116	35	20	106	20	889	98.3	6.68	251.79	20	other metabolic processes;transport;developmental processes;other biological processes	cytosol;mitochondrion;ER/Golgi;other cell component	nucleic acid binding activity;other molecular function	Pf00330, Pf00694	48	ENSG00000122729	ACO1	D3DRK7; hsa:48; P21399; Q14652; Q5VZA7	Iron metabolism in placenta; TCA cycle and deficiency of pyruvate dehydrogenase complex (PDHc)	Iron uptake and transport	3	0	0.589	0.227222	0.713171	50.17	76.6	123.4	34.89	22.67	High	High	High	High	High	High	1
FALSE	High	Master Protein	Q14204	Cytoplasmic dynein 1 heavy chain 1 [OS=Homo sapiens]	0	165.103	13	43	106	43	4646	532.1	6.4	232.55	43	cell cycle OR cell proliferation;cell organization and biogenesis;transport;other biological processes	non-structural extracellular;cytosol;cytoskeleton;other cytoplasmic organelle;other cell component	cytoskeletal activity;other molecular function	Pf03028, Pf08385, Pf08393, Pf12774, Pf12775, Pf12777, Pf12780, Pf12781, Pf17852, Pf18198, Pf18199	1778	ENSG00000197102	DYNC1H1	B0I1R0; hsa:1778; Q14204; Q6DKQ7; Q8WU28; Q92814; Q9Y4G5	Ciliary landscape; Intraflagellar transport proteins binding to dynein; Vasopressin-regulated water reabsorption; PAFAH1B1 copy number variation	Neutrophil degranulation; HSP90 chaperone cycle for steroid hormone receptors (SHR) in the presence of ligand; COPI-mediated anterograde transport; Separation of Sister Chromatids; MHC class II antigen presentation; Resolution of Sister Chromatid Cohesion; Recruitment of NuMA to mitotic centrosomes; RHO GTPases Activate Formins; COPI-independent Golgi-to-ER retrograde traffic; HCMV Early Events; …	24	0	0.551	0.142702	0.616866	65.82	54.6	145.4	66.98	46.55	High	High	High	High	High	High	1
FALSE	High	Master Protein	Q16775	Hydroxyacylglutathione hydrolase, mitochondrial [OS=Homo sapiens]	0	74.368	59	11	106	11	308	33.8	8.12	287.25	11	other metabolic processes	cytosol;mitochondrion;other cell component	other molecular function	Pf00753, Pf16123	3029	ENSG00000063854	HAGH	A8K290; B4DP33; B4DRA7; E7EN93; hsa:3029; Q16775			0	0	1.432	0.0872591	0.466906	81.72	131.5	68.5	37.82	73.13	High	High	High	High	High	High	1
FALSE	High	Master Protein	Q9Y3D2	Methionine-R-sulfoxide reductase B2, mitochondrial [OS=Homo sapiens]	0	81.595	61	9	105	9	182	19.5	8.63	316.91	9	cell organization and biogenesis;protein metabolism;other metabolic processes;stress response	cytosol;mitochondrion;other cell component	cytoskeletal activity;other molecular function	Pf01641	22921	ENSG00000148450	MSRB2	hsa:22921; Q17R44; Q4G1C7; Q9Y3D2; Q9Y5W6	Sulindac metabolic pathway; Methionine de novo and salvage pathway	Protein repair	3	0	0.874	0.982856	0.999898	71.44	116.7	83.3	46.72	52.54	High	High	High	High	High	High	1
FALSE	High	Master Protein	P53597	Succinate--CoA ligase [ADP/GDP-forming] subunit alpha, mitochondrial [OS=Homo sapiens]	0	80.332	32	11	105	11	346	36.2	8.79	330.19	11	other metabolic processes	mitochondrion;other cell component	other molecular function	Pf00549, Pf02629	8802	ENSG00000163541	SUCLG1	hsa:8802; P53597; Q9BWB0; Q9UNP6	Amino acid metabolism; TCA cycle (aka Krebs or citric acid cycle)	Citric acid cycle (TCA cycle)	3	0	0.891	0.964583	0.998171	58.63	88.9	111.1	41.92	35.38	High	High	High	High	High	High	1
FALSE	High	Master Protein	Q9HC38	Glyoxalase domain-containing protein 4 [OS=Homo sapiens]	0	56.266	41	11	105	11	313	34.8	5.6	253.25	11		mitochondrion		Pf21207, Pf21701	51031	ENSG00000167699	GLOD4	D3DTG9; D3DTH1; hsa:51031; Q96B89; Q9H3J8; Q9HC37; Q9HC38; Q9NVN1			0	0	0.984	0.694881	0.954938	63.57	115.1	84.9	17.98	56.8	High	High	High	High	High	High	1
FALSE	High	Master Protein	P51452	Dual specificity protein phosphatase 3 [OS=Homo sapiens]	0	81.279	58	8	105	8	185	20.5	7.8	277.56	8	protein metabolism;other metabolic processes;other biological processes	plasma membrane;cytosol;nucleus;other cell component	signal transduction activity or receptor binding;cytoskeletal activity;other molecular function	Pf00782	1845	ENSG00000108861	DUSP3	D3DX45; hsa:1845; P51452; Q5U0J1; Q8IYJ9	MAPK signaling pathway; Fragile X syndrome	ERKs are inactivated	3	0	1.122	0.392929	0.866536	76.12	126.2	73.8	51.08	44.52	High	High	High	High	High	High	1
FALSE	High	Master Protein	Q9Y6M9	NADH dehydrogenase [ubiquinone] 1 beta subcomplex subunit 9 [OS=Homo sapiens]	0	60.33	54	9	104	9	179	21.8	8.38	303.12	9	cell organization and biogenesis;other metabolic processes;transport;other biological processes	other membranes;mitochondrion	transporter activity	Pf05347	4715	ENSG00000147684	NDUFB9	B2R8M6; hsa:4715; Q9UQE8; Q9Y6M9	Electron transport chain: OXPHOS system in mitochondria; Nonalcoholic fatty liver disease; Mitochondrial immune response to SARS-CoV-2; Oxidative phosphorylation	Complex I biogenesis	6	0	0.895	0.951249	0.996797	43.09	91.7	108.3	43.35	16.61	High	High	High	High	High	High	1
FALSE	High	Master Protein	Q9UHV9	Prefoldin subunit 2 [OS=Homo sapiens]	0	51.791	49	6	104	6	154	16.6	6.58	267.36	6	protein metabolism;other metabolic processes;other biological processes	cytosol;mitochondrion;nucleus;other cell component	other molecular function	Pf01920	5202	ENSG00000143256	PFDN2	hsa:5202; Q9P0P7; Q9UHV9; Q9UN05	Cellular proteostasis	Prefoldin mediated transfer of substrate to CCT/TriC	2	0	0.667	0.33089	0.822029	79.94	84.1	115.9	44.59	54.73	High	High	High	High	High	High	1
FALSE	High	Master Protein	Q7Z3D6	D-glutamate cyclase, mitochondrial [OS=Homo sapiens]	0	118.831	45	20	104	20	616	66.4	6.79	309.19	20	other metabolic processes	mitochondrion	other molecular function	Pf07286, Pf14336	80017	ENSG00000133943	DGLUCY	B3KUI7; hsa:80017; Q7Z3D6; Q86SW3; Q86SX8; Q86SX9; Q86T08; Q86TV5; Q96GW5; Q9H7G0; Q9H8Y9; Q9H9W6			0	0	0.646	0.277853	0.779056	74.78	88.4	111.6	47.81	19.99	High	High	High	High	High	High	1
TRUE	High	Master Protein	P0DOX2	Immunoglobulin alpha-2 heavy chain [OS=Homo sapiens]	0	82.632	44	12	104	8	455	48.9	6.67	278.08	12	other biological processes	non-structural extracellular;plasma membrane;other membranes;other cell component		Pf00047, Pf07654, Pf07686							0	4	2.136	0.00184717	0.0304863	107.76	148.9	51.1	67.61	113.8	High	High	High	High	High	Peak Found	1
FALSE	High	Master Protein	P25325	3-mercaptopyruvate sulfurtransferase [OS=Homo sapiens]	0	71.1	51	10	103	9	297	33.2	6.6	291.48	10	other metabolic processes;developmental processes;other biological processes	mitochondrion;other cell component	other molecular function	Pf00581	4357	ENSG00000128309	MPST	A8MZ34; B3KP52; hsa:4357; J3KPV7; O75750; P25325; Q6FHN9	Trans-sulfuration pathway; Amino acid metabolism	Degradation of cysteine and homocysteine	3	1	0.877	0.99603	0.999898	68.15	114.1	85.9	24.48	55.74	High	High	High	High	High	High	1
FALSE	High	Master Protein	P52565	Rho GDP-dissociation inhibitor 1 [OS=Homo sapiens]	0	70.643	36	10	103	10	204	23.2	5.11	260.17	10	signal transduction;other biological processes	plasma membrane;other membranes;cytosol;cytoskeleton;nucleus;other cell component	enzyme regulator activity	Pf02115	396	ENSG00000141522	ARHGDIA	A8MXW0; B2R5X1; B4DDD3; B4DUV9; hsa:396; P52565; Q6IBM5	Ciliary landscape; Nephrotic syndrome; Vasopressin-regulated water reabsorption	RHOC GTPase cycle; RHOA GTPase cycle; CDC42 GTPase cycle; RAC1 GTPase cycle; RHOG GTPase cycle; RAC2 GTPase cycle; RHOH GTPase cycle; Axonal growth stimulation; Axonal growth inhibition (RHOA activation)	12	0	0.863	0.957579	0.996892	69.64	89.1	110.9	65.35	15.62	High	High	High	High	High	High	1
FALSE	High	Master Protein	P08123	Collagen alpha-2(I) chain [OS=Homo sapiens]	0	86.264	12	14	103	14	1366	129.2	8.95	321.58	14	cell organization and biogenesis;other metabolic processes;developmental processes;signal transduction;other biological processes	non-structural extracellular;extracellular matrix;ER/Golgi	extracellular structural activity;other molecular function	Pf01391, Pf01410	1278	ENSG00000164692	COL1A2	hsa:1278; P02464; P08123; Q13897; Q13997; Q13998; Q14038; Q14057; Q15177; Q15947; Q16480; Q16511; Q7Z5S6; Q9UEB6; Q9UEF9; Q9UM83; Q9UMI1; Q9UML5; Q9UMM6; Q9UPH0	miRNA targets in ECM and membrane receptors; Focal adhesion; TGF-beta signaling pathway; Focal adhesion: PI3K-Akt-mTOR-signaling pathway; PI3K-Akt signaling pathway; Inflammatory response pathway; IL-18 signaling pathway; Type I collagen synthesis in the context of osteogenesis imperfecta; Angiotensin II receptor type 1 pathway; CCL18 signaling pathway; NRP1-triggered signaling pathways in pancre…	Collagen degradation; Integrin cell surface interactions; ECM proteoglycans; Collagen chain trimerization; Immunoregulatory interactions between a Lymphoid and a non-Lymphoid cell; Cell surface interactions at the vascular wall; SMAD2/SMAD3:SMAD4 heterotrimer regulates transcription; GPVI-mediated activation cascade; Interleukin-4 and Interleukin-13 signaling; Syndecan interactions; MET activates…	37	0	0.724	0.493714	0.903802	50.97	83	117	16.77	4.87	High	High	High	High	High	High	1
FALSE	High	Master Protein	P52272	Heterogeneous nuclear ribonucleoprotein M [OS=Homo sapiens]	0	93.042	40	24	103	24	730	77.5	8.7	249.18	24	RNA metabolism OR transcription;other metabolic processes	nucleus;other cell component	nucleic acid binding activity;other molecular function	Pf00076, Pf11532	4670	ENSG00000099783	HNRNPM	hsa:4670; P52272; Q15584; Q8WZ44; Q96H56; Q9BWL9; Q9Y492	mRNA processing	Processing of Capped Intron-Containing Pre-mRNA; mRNA Splicing - Major Pathway; FGFR2 alternative splicing	4	0	1.482	0.0687812	0.409585	80.37	129.2	70.8	24.59	63.26	High	High	High	High	High	High	1
FALSE	High	Master Protein	P10599	Thioredoxin [OS=Homo sapiens]	0	36.154	68	6	102	6	105	11.7	4.92	253.01	6	other metabolic processes;stress response;other biological processes	non-structural extracellular;cytosol;nucleus;other cell component	other molecular function	Pf00085	7295	ENSG00000136810	TXN	B1ALW1; hsa:7295; O60744; P10599; Q53X69; Q96KI3; Q9UDG5	Selenium micronutrient network; Folic acid network; Selenium micronutrient network ; Folic acid network; Selenium micronutrient network; TNF-alpha signaling pathway; Complement system; Nuclear receptors meta-pathway; NRF2 pathway; VEGFA-VEGFR2 signaling; TAR syndrome	TP53 Regulates Metabolic Genes; Detoxification of Reactive Oxygen Species; Oxidative Stress Induced Senescence; Interconversion of nucleotide di- and triphosphates; NFE2L2 regulating anti-oxidant/detoxification enzymes; The NLRP3 inflammasome; Purinergic signaling in leishmaniasis infection; Regulation of FOXO transcriptional activity by acetylation; Protein repair	20	0	0.851	0.906722	0.994751	47.71	90.4	109.6	16.39	23.73	High	High	High	High	High	High	1
FALSE	High	Master Protein	Q9BUF5	Tubulin beta-6 chain [OS=Homo sapiens]	0	109.282	50	16	102	10	446	49.8	4.88	300.4	16	cell cycle OR cell proliferation;cell organization and biogenesis	cytoskeleton;other cell component	cytoskeletal activity;other molecular function	Pf00091, Pf03953	84617	ENSG00000176014	TUBB6	B3KM76; hsa:84617; Q9BUF5; Q9HA42	Alzheimer's disease and miRNA effects; Pathogenic Escherichia coli infection; Parkin-ubiquitin proteasomal system pathway; Alzheimer's disease	Prefoldin mediated transfer of substrate to CCT/TriC; Recruitment of NuMA to mitotic centrosomes; Recycling pathway of L1; Separation of Sister Chromatids; Resolution of Sister Chromatid Cohesion; RHO GTPases Activate Formins; EML4 and NUDC in mitotic spindle formation; Assembly and cell surface presentation of NMDA receptors; HCMV Early Events; Post-chaperonin tubulin folding pathway; Intraflage…	35	0	0.995	0.664906	0.946903	57.9	99.7	100.3	70.55	43.35	High	High	High	High	High	High	1
FALSE	High	Master Protein	P25398	40S ribosomal protein S12 [OS=Homo sapiens]	0	60.857	55	9	102	9	132	14.5	7.21	307.23	9	protein metabolism;other metabolic processes;other biological processes	cytosol;ER/Golgi;translational apparatus;nucleus;other cell component	other molecular function	Pf01248	6206	ENSG00000112306	RPS12	hsa:6206; P25398; Q76M58	Cytoplasmic ribosomal proteins	Regulation of expression of SLITs and ROBOs; L13a-mediated translational silencing of Ceruloplasmin expression; Translation initiation complex formation; Formation of a pool of free 40S subunits; Formation of the ternary complex, and subsequently, the 43S complex; Ribosomal scanning and start codon recognition; GTP hydrolysis and joining of the 60S ribosomal subunit; Major pathway of rRNA process…	19	0	1.269	0.19821	0.685297	73.32	126.1	73.9	30.46	64.43	High	High	High	High	High	High	1
TRUE	High	Master Protein	Q15063	Periostin [OS=Homo sapiens]	0	102.228	41	23	102	23	836	93.3	7.53	286.1	23	cell adhesion;cell organization and biogenesis;stress response;developmental processes;other biological processes	non-structural extracellular;extracellular matrix;ER/Golgi;other cell component	other molecular function	Pf02469	10631	ENSG00000133110	POSTN	B1ALD8; C0IMJ1; C0IMJ2; C0IMJ4; D2KRH7; F5H628; hsa:10631; Q15063; Q15064; Q29XZ0; Q3KPJ5; Q5VSY5; Q8IZF9	Hypothesized pathways in pathogenesis of cardiovascular disease; Amplification and expansion of oncogenic pathways as metastatic traits		2	0	2.539	0.000199001	0.00450872	88.22	138.9	61.1	83.93	67.75	High	High	High	High	High	High	1
FALSE	High	Master Protein	P21291	Cysteine and glycine-rich protein 1 [OS=Homo sapiens]	0	62.6	64	11	101	10	193	20.6	8.57	250.06	11	cell organization and biogenesis;other biological processes	cytoskeleton;nucleus;other cell component	cytoskeletal activity;other molecular function	Pf00412	1465	ENSG00000159176	CSRP1	A8K268; hsa:1465; P21291; Q5U0J2	MECP2 and associated Rett syndrome; VEGFA-VEGFR2 signaling	MTF1 activates gene expression	3	0	0.839	0.867606	0.988397	93.31	97.1	102.9	90.91	27.74	High	High	High	High	High	High	1
FALSE	High	Master Protein	P19021	Peptidyl-glycine alpha-amidating monooxygenase [OS=Homo sapiens]	0	120.341	40	26	101	26	973	108.3	6.42	281.77	26	other metabolic processes;other biological processes	non-structural extracellular;other membranes;ER/Golgi	other molecular function	Pf01082, Pf01436, Pf03712	5066	ENSG00000145730	PAM	A6NMR0; A8K293; hsa:5066; O43211; O95080; P19021; Q16252; Q16253; Q54A45; Q86U53; Q8WVC7; Q9UCG0			0	0	0.619	0.216939	0.701248	75.45	85.3	114.7	51.72	27.97	High	High	High	High	High	High	1
FALSE	High	Master Protein	P22392	Nucleoside diphosphate kinase B [OS=Homo sapiens]	0	41.748	59	7	101	3	152	17.3	8.41	230.76	7	cell adhesion;protein metabolism;other metabolic processes;stress response;signal transduction;other biological processes	non-structural extracellular;other membranes;cytosol;cytoskeleton;mitochondrion;other cell component	nucleic acid binding activity;kinase activity;other molecular function	Pf00334	4831; 654364	ENSG00000243678	NME2	A8MWA3; hsa:4831; hsa:654364; P22392; Q1WM23; Q6LCT6	Pyrimidine metabolism	Neutrophil degranulation; Interconversion of nucleotide di- and triphosphates; Azathioprine ADME; Ribavirin ADME	5	0	1.344	0.170398	0.66509	82.62	127.2	72.8	21.97	84.77	High	High	High	High	High	High	1
FALSE	High	Master Protein	Q15124	Phosphoglucomutase-like protein 5 [OS=Homo sapiens]	0	97.045	56	21	100	21	567	62.2	7.21	234.1	21	cell adhesion;cell organization and biogenesis;other metabolic processes;other biological processes	plasma membrane;other membranes;cytosol;cytoskeleton;other cell component	other molecular function	Pf02878, Pf02879, Pf02880	5239	ENSG00000154330	PGM5	B1AM46; B4DLQ6; hsa:5239; Q15124; Q5VYV3; Q8N527; Q9UDH4	Glucuronidation		1	0	0.749	0.617497	0.937983	61.61	91.6	108.4	26.49	22.13	High	High	High	High	High	High	1	Acetyl [N-Term]
FALSE	High	Master Protein	P10768	S-formylglutathione hydrolase [OS=Homo sapiens]	0	81.446	54	10	100	10	282	31.4	7.02	299.87	10	other metabolic processes	cytosol;ER/Golgi;other cell component	other molecular function	Pf00756	2098	ENSG00000139684	ESD	hsa:2098; P10768; Q5TBU8; Q5TBV0; Q5TBV2; Q9BVJ2	Phase I biotransformations, non-P450	Glutathione conjugation	2	0	0.688	0.394151	0.867505	73.19	89.9	110.1	41.25	32.84	High	High	High	High	High	High	1
FALSE	High	Master Protein	P48643	T-complex protein 1 subunit epsilon [OS=Homo sapiens]	0	76.012	43	16	99	15	541	59.6	5.66	223.12	16	protein metabolism;other metabolic processes;other biological processes	cytosol;cytoskeleton;other cell component	cytoskeletal activity;nucleic acid binding activity;other molecular function	Pf00118	22948	ENSG00000150753	CCT5	A8JZY8; A8K2X8; B4DYD8; hsa:22948; P48643	16p11.2 proximal deletion syndrome	Formation of tubulin folding intermediates by CCT/TriC; BBSome-mediated cargo-targeting to cilium; Association of TriC/CCT with target proteins during biosynthesis; Cooperation of PDCL (PhLP1) and TRiC/CCT in G-protein beta folding; Prefoldin mediated transfer of substrate to CCT/TriC; Folding of actin by CCT/TriC	7	0	0.669	0.400692	0.870744	53.78	91.9	108.1	46.8	24.18	High	High	High	High	High	High	1
FALSE	High	Master Protein	O75323	Protein NipSnap homolog 2 [OS=Homo sapiens]	0	80.057	60	12	99	11	286	33.7	9.36	299.57	12	cell organization and biogenesis;other metabolic processes;other biological processes	other membranes;mitochondrion		Pf07978	2631	ENSG00000146729	NIPSNAP2	C9IYJ3; hsa:2631; O43801; O75323; Q53X96		RHOJ GTPase cycle; RHOH GTPase cycle	2	1	0.519	0.0911294	0.480936	77.96	77.1	122.9	49.22	40.7	High	High	High	High	High	High	1
TRUE	High	Master Protein	A0M8Q6	Immunoglobulin lambda constant 7 [OS=Homo sapiens]	0	32.461	42	3	99	1	106	11.2	8.29	308.7	3	signal transduction;other biological processes	non-structural extracellular;plasma membrane;other membranes;other cell component	other molecular function	Pf07654			IGLC7	A0A075B6L1; A0M8Q6		Initial triggering of complement; Classical antibody-mediated complement activation; Immunoregulatory interactions between a Lymphoid and a non-Lymphoid cell; Cell surface interactions at the vascular wall; FCGR activation; Regulation of actin dynamics for phagocytic cup formation; Role of phospholipids in phagocytosis; Scavenging of heme from plasma; Role of LAT2/NTAL/LAB on calcium mobilization…	19	0	4.691	8.79339e-05	0.00213692	63.03	164.9	35.1	66.37	31.06	Peak Found	Not Found	High	Peak Found	High	Not Found	1
FALSE	High	Master Protein	P22352	Glutathione peroxidase 3 [OS=Homo sapiens]	0	43.691	45	7	98	7	226	25.5	8.13	230.27	7	other metabolic processes;stress response;other biological processes	non-structural extracellular	other molecular function	Pf00255	2878	ENSG00000211445	GPX3	hsa:2878; O43787; P22352; Q86W78; Q9NZ74; Q9UEL1	Glutathione metabolism; Selenium micronutrient network; Folate metabolism; Trans-sulfuration, one-carbon metabolism and related pathways; Selenium metabolism and selenoproteins; Nuclear receptors meta-pathway; NRF2 pathway; One-carbon metabolism and related pathways; Oxidative stress response; Metapathway biotransformation Phase I and II	Detoxification of Reactive Oxygen Species	11	0	0.74	0.543949	0.920196	53.83	72.5	127.5	43.01	14.63	High	High	High	High	High	High	1
FALSE	High	Master Protein	Q13162	Peroxiredoxin-4 [OS=Homo sapiens]	0	54.763	54	10	98	9	271	30.5	6.29	231.77	10	cell organization and biogenesis;protein metabolism;other metabolic processes;stress response;developmental processes;signal transduction;other biological processes	non-structural extracellular;cytosol;ER/Golgi;other cell component	other molecular function	Pf00578, Pf10417	10549	ENSG00000123131	PRDX4	hsa:10549; Q13162; Q6FHT3	Selenium micronutrient network	Neutrophil degranulation	2	0	0.666	0.421904	0.880087	58.36	80	120	26.31	38.75	High	High	High	High	High	High	1
FALSE	High	Master Protein	P20231	Tryptase beta-2 [OS=Homo sapiens]	0	75.282	48	12	98	12	275	30.5	7.11	261.47	12	cell organization and biogenesis;protein metabolism;stress response		other molecular function	Pf00089	7177	ENSG00000172236	TPSAB1	D2E6R9; D2E6S1; hsa:7177; P15157; Q15661; Q15663; Q6B052; Q9H2Y4; Q9H2Y5; Q9UQI1		Activation of Matrix Metalloproteinases	1	0	1.338	0.140915	0.614553	67.15	102.6	97.4	29.43	36.74	High	High	High	High	High	High	1
FALSE	High	Master Protein	P24539	ATP synthase F(0) complex subunit B1, mitochondrial [OS=Homo sapiens]	0	75.076	47	14	98	14	256	28.9	9.36	237.55	14	other metabolic processes;transport	other membranes;mitochondrion	transporter activity	Pf05405	515	ENSG00000116459	ATP5PB	hsa:515; P24539; Q9BQ68; Q9BRU8	Electron transport chain: OXPHOS system in mitochondria; 7q11.23 copy number variation syndrome; Oxidative phosphorylation	Cristae formation; Formation of ATP by chemiosmotic coupling	5	0	0.573	0.133225	0.599812	67.31	78.8	121.2	58.75	48.71	High	High	High	High	High	High	1
FALSE	High	Master Protein	O14773	Tripeptidyl-peptidase 1 [OS=Homo sapiens]	0	40.892	20	6	98	6	563	61.2	6.48	235.04	6	cell organization and biogenesis;protein metabolism;other metabolic processes;developmental processes;other biological processes	other membranes;ER/Golgi;other cytoplasmic organelle;other cell component	other molecular function	Pf00082, Pf09286	1200	ENSG00000166340	TPP1	hsa:1200; O14773; Q53HT1; Q5JAK6; Q6UX56; Q71JP6; Q96C37	VEGFA-VEGFR2 signaling	XBP1(S) activates chaperone genes	2	0	1.356	0.128438	0.590383	63.04	125.8	74.2	35.89	40.41	High	High	High	High	High	High	1
FALSE	High	Master Protein	Q9BR39	Junctophilin-2 [OS=Homo sapiens]	0	111.215	38	16	97	16	696	74.2	8.72	252.83	16	transport;other biological processes	plasma membrane;other membranes;cytosol;cytoskeleton;ER/Golgi;nucleus	nucleic acid binding activity;other molecular function	Pf02493	57158	ENSG00000149596	JPH2	E1P5X1; hsa:57158; O95913; Q5JY74; Q9BR39; Q9UJN4			0	0	0.879	0.982295	0.999898	86.29	106.5	93.5	58.32	61.93	High	High	High	High	High	High	1
FALSE	High	Master Protein	Q5VTT5	Myomesin-3 [OS=Homo sapiens]	0	106.607	23	25	97	25	1437	162.1	6.23	244.54	25		cytoskeleton	other molecular function	Pf00041, Pf07679	127294	ENSG00000142661	MYOM3	A6NF75; hsa:127294; Q5VTT5; Q5VTT6; Q6AWC0; Q6AWC1; Q6NXF9; Q6ZRG7; Q7Z3G9; Q8NA11; Q96C54			0	0	0.872	0.961271	0.997481	64.42	102.7	97.3	45.71	18.12	High	High	High	High	High	High	1
FALSE	High	Master Protein	P10644	cAMP-dependent protein kinase type I-alpha regulatory subunit [OS=Homo sapiens]	0	61.281	35	13	97	13	381	43	5.35	183.23	13	cell cycle OR cell proliferation;cell organization and biogenesis;developmental processes;signal transduction;other biological processes	plasma membrane;other membranes;cytosol;cytoskeleton;other cytoplasmic organelle;other cell component	enzyme regulator activity;other molecular function	Pf00027, Pf02197	5573	ENSG00000108946	PRKAR1A	hsa:5573; K7ER48; P10644; Q567S7	Mesodermal commitment pathway; Myometrial relaxation and contraction pathways; Mesodermal commitment pathway; G protein signaling pathways; Cannabinoid receptor signaling; Lipid metabolism pathway; Hippo signaling regulation pathways; Hippo-Merlin signaling dysregulation; Fragile X syndrome; Cardiomyocyte signaling pathways converging on titin; Calcium regulation in cardiac cells; ADHD and autism…	ALK mutants bind TKIs; Signaling by ALK fusions and activated point mutants; FCGR3A-mediated IL10 synthesis; GPER1 signaling; ADORA2B mediated anti-inflammatory cytokines production; Factors involved in megakaryocyte development and platelet production; Glucagon-like Peptide-1 (GLP1) regulates insulin secretion; Vasopressin regulates renal water homeostasis via Aquaporins; PKA activation; PKA act…	27	0	0.852	0.910551	0.994751	69.47	98.4	101.6	41.96	17.38	High	High	High	High	High	High	1
FALSE	High	Master Protein	Q9NZN3	EH domain-containing protein 3 [OS=Homo sapiens]	0	92.755	42	15	97	8	535	60.8	6.57	247.66	15	cell organization and biogenesis;other metabolic processes;transport;other biological processes	plasma membrane;other membranes;cytosol;nucleus;other cytoplasmic organelle;other cell component	nucleic acid binding activity;other molecular function	Pf00350, Pf12763, Pf16880, Pf18150	30845	ENSG00000013016	EHD3	B4DFR5; D6W574; hsa:30845; Q8N514; Q9NZB3; Q9NZN3	Ciliary landscape	Factors involved in megakaryocyte development and platelet production	2	0	0.919	0.841507	0.982058	84.49	101.4	98.6	69.34	67.27	High	High	High	High	High	High	1
FALSE	High	Master Protein	O75347	Tubulin-specific chaperone A [OS=Homo sapiens]	0	53.713	46	10	97	10	108	12.8	5.29	240.79	10	cell organization and biogenesis;protein metabolism;other metabolic processes	cytoskeleton;nucleus;other cell component	cytoskeletal activity;other molecular function	Pf02970	6902	ENSG00000171530	TBCA	B4DT30; hsa:6902; O75347	VEGFA-VEGFR2 signaling	Post-chaperonin tubulin folding pathway	2	0	0.782	0.68136	0.952994	51.37	91.1	108.9	35.93	33.97	High	High	High	High	High	High	1
FALSE	High	Master Protein	O43837	Isocitrate dehydrogenase [NAD] subunit beta, mitochondrial [OS=Homo sapiens]	0	88.141	38	15	97	15	385	42.2	8.46	228.06	15	other metabolic processes	mitochondrion	other molecular function	Pf00180	3420	ENSG00000101365	IDH3B	B2RDR1; D3DVX2; D3DVX3; hsa:3420; O43837; O95106; Q5JXS8; Q9NQ06; Q9NQ07; Q9NUZ0; Q9UEX0; Q9UG99	TCA cycle (aka Krebs or citric acid cycle)	Citric acid cycle (TCA cycle)	2	0	0.73	0.510148	0.905576	46.27	87.1	112.9	41.55	24.68	High	High	High	High	High	High	1
FALSE	High	Master Protein	O14950	Myosin regulatory light chain 12B [OS=Homo sapiens]	0	63.639	46	9	97	3	172	19.8	4.84	261.32	9	other biological processes	cytosol;cytoskeleton;other cell component	cytoskeletal activity;other molecular function	Pf08976, Pf13499	103910; 10627	ENSG00000118680	MYL12B	D3DUH6; hsa:103910; O14950; Q13182; Q7Z5Z4	Thyroid stimulating hormone (TSH) signaling pathway; Focal adhesion	RHO GTPases activate CIT; EPHA-mediated growth cone collapse; Sema4D induced cell migration and growth-cone collapse; Smooth Muscle Contraction; RHO GTPases activate PKNs; RHO GTPases Activate ROCKs; RHO GTPases activate PAKs	9	0	1.067	0.476913	0.900712	68.1	103	97	11.91	52.1	High	High	High	Peak Found	High	High	1
FALSE	High	Master Protein	P02462	Collagen alpha-1(IV) chain [OS=Homo sapiens]	0	75.251	8	9	97	7	1669	160.5	8.28	259.54	9	cell organization and biogenesis;developmental processes;signal transduction;other biological processes	non-structural extracellular;extracellular matrix;ER/Golgi	extracellular structural activity;other molecular function	Pf01391, Pf01413	1282	ENSG00000187498	COL4A1	A7E2W4; B1AM70; F5H5K0; P02462; Q1P9S9; Q5VWF6; Q86X41; Q8NF88; Q9NYC5	Spinal cord injury; miRNA targets in ECM and membrane receptors; Focal adhesion; Overview of nanoparticle effects; Focal adhesion: PI3K-Akt-mTOR-signaling pathway; PI3K-Akt signaling pathway; Epithelial to mesenchymal transition in colorectal cancer; Small cell lung cancer; Pleural mesothelioma; Macrophage-stimulating protein (MSP) signaling network map	Collagen degradation; Signaling by PDGF; Integrin cell surface interactions; ECM proteoglycans; NCAM1 interactions; Collagen chain trimerization; Non-integrin membrane-ECM interactions; Laminin interactions; Anchoring fibril formation; Crosslinking of collagen fibrils; Scavenging by Class A Receptors	24	2	1.437	0.0851544	0.461836	93.79	116	84	84.27	40.31	High	High	High	High	High	High	1
FALSE	High	Master Protein	P47756	F-actin-capping protein subunit beta [OS=Homo sapiens]	0	77.063	60	14	96	14	277	31.3	5.59	283.85	14	cell organization and biogenesis	cytoskeleton;other cell component	cytoskeletal activity	Pf01115	100612860; 102838979	ENSGGOG00000003982; ENSPPYG00000001789; ENSPTRG00000000268	CAPZB	A0A2J8KEQ9; A0A2J8T2J3; A0A6D2W7V0; A0A6D2XKL1; A0A8B6ZIG4; A0A9B0TL78; G3QN07; H2N8T0; H2R9E0			0	0	0.922	0.868398	0.988397	40.81	99.1	100.9	27.01	19.97	High	High	High	High	High	High	1
FALSE	High	Master Protein	Q9P2E9	Ribosome-binding protein 1 [OS=Homo sapiens]	0	113.677	26	29	96	28	1410	152.4	8.6	240.3	29	protein metabolism;other metabolic processes;transport	other membranes;ER/Golgi;translational apparatus	other molecular function	Pf05104	6238	ENSG00000125844	RRBP1	A0A0A0MRV0; A2A2S6; A6NCN6; hsa:6238; O75300; O75301; Q5W165; Q96SB2; Q9BWP1; Q9H476; Q9P2E9	Ectoderm differentiation	Signaling by ALK fusions and activated point mutants	2	1	0.804	0.790993	0.97229	59.37	69.2	130.8	48.35	8.84	High	High	High	High	High	High	1
FALSE	High	Master Protein	P04080	Cystatin-B [OS=Homo sapiens]	0	52.634	70	4	96	4	98	11.1	7.56	314.06	4	other biological processes	non-structural extracellular;cytosol;nucleus;other cell component	enzyme regulator activity;other molecular function	Pf00031	1476	ENSG00000160213	CSTB	hsa:1476; P04080		Neutrophil degranulation	1	0	0.953	0.779612	0.97229	63.82	117.4	82.6	36.42	26.47	High	High	High	High	High	High	1	Acetyl [N-Term]
FALSE	High	Master Protein	Q12904	Aminoacyl tRNA synthase complex-interacting multifunctional protein 1 [OS=Homo sapiens]	0	101.835	69	16	96	16	312	34.3	8.43	280.66	16	cell-cell signaling;protein metabolism;other metabolic processes;stress response;developmental processes;signal transduction;other biological processes	non-structural extracellular;cytosol;ER/Golgi;nucleus;other cell component	signal transduction activity or receptor binding;nucleic acid binding activity;other molecular function	Pf01588	9255	ENSG00000164022	AIMP1	B3KTR2; B4E1S7; hsa:9255; Q12904; Q6FG28; Q96CQ9	Ciliary landscape	Selenoamino acid metabolism; Cytosolic tRNA aminoacylation	3	0	1.058	0.517486	0.90826	81.65	119.9	80.1	38.11	78.86	High	High	High	High	High	High	1
FALSE	High	Master Protein	P23588	Eukaryotic translation initiation factor 4B [OS=Homo sapiens]	0	79.779	29	16	96	16	611	69.1	5.73	259.14	16	protein metabolism;other metabolic processes;other biological processes	cytosol;translational apparatus	nucleic acid binding activity	Pf00076	1975	ENSG00000063046	EIF4B	B4DS13; hsa:1975; P23588; Q4G0E3; Q53HQ2; Q6GPH5; Q6IB46; Q8WYK5	Translation factors; Focal adhesion: PI3K-Akt-mTOR-signaling pathway; PI3K-Akt signaling pathway; Translation inhibitors in chronically activated PDGFRA cells; Perturbations to host-cell autophagy, induced by SARS-CoV-2 proteins; Pleural mesothelioma; Interferon type I signaling pathways	GTP hydrolysis and joining of the 60S ribosomal subunit; Deadenylation of mRNA; M-decay: degradation of maternal mRNAs by maternally stored factors; L13a-mediated translational silencing of Ceruloplasmin expression; Translation initiation complex formation; Ribosomal scanning and start codon recognition; mTORC1-mediated signalling; Z-decay: degradation of maternal mRNAs by zygotically expressed f…	16	0	0.72	0.481885	0.900779	59.6	91.4	108.6	25.95	35.23	High	High	High	High	High	High	1
FALSE	High	Master Protein	Q14767	Latent-transforming growth factor beta-binding protein 2 [OS=Homo sapiens]	0	116.926	21	25	96	24	1821	194.9	5.19	234.51	25	cell organization and biogenesis;transport;signal transduction;other biological processes	extracellular matrix	other molecular function	Pf00008, Pf00683, Pf07645	4053	ENSG00000119681	LTBP2	hsa:4053; Q14767; Q99907; Q9NS51	Hypothesized pathways in pathogenesis of cardiovascular disease	Molecules associated with elastic fibres; TGF-beta receptor signaling activates SMADs	3	1	1.275	0.212023	0.700895	75.76	116.9	83.1	72.11	19.67	High	High	High	High	High	High	1
TRUE	High	Master Protein	P98095	Fibulin-2 [OS=Homo sapiens]	0	113.058	26	22	96	22	1184	126.5	4.82	256.26	22	other biological processes	extracellular matrix	extracellular structural activity;other molecular function	Pf01821, Pf07645, Pf12662, Pf14670	2199	ENSG00000163520	FBLN2	B7Z9C5; hsa:2199; P98095; Q8IUI0; Q8IUI1	7q11.23 copy number variation syndrome	Molecules associated with elastic fibres	2	0	0.435	0.0258086	0.221564	61.81	63.4	136.6	30.32	54.99	High	High	High	High	High	High	1
FALSE	High	Master Protein	Q14BN4	Sarcolemmal membrane-associated protein [OS=Homo sapiens]	0	98.208	25	22	95	22	828	95.1	5.47	236.61	22	other biological processes	plasma membrane;other membranes;cytoskeleton;ER/Golgi		Pf00498	7871	ENSG00000163681	SLMAP	hsa:7871; Q14BN4; Q14C95; Q6AI54; Q6UXC9; Q6ZVQ8; Q8NCW9; Q9H297; Q9HCH1; Q9Y681			0	0	0.833	0.845439	0.983051	56.16	99.6	100.4	48.45	1.64	High	High	High	High	High	High	1
FALSE	High	Master Protein	P22307	Sterol carrier protein 2 [OS=Homo sapiens]	0	64.767	27	13	95	13	547	59	6.89	244.58	13	cell organization and biogenesis;other metabolic processes;transport;other biological processes	cytosol;mitochondrion;ER/Golgi;nucleus;other cytoplasmic organelle;other cell component	signal transduction activity or receptor binding;transporter activity;other molecular function	Pf00108, Pf02036, Pf02803	6342	ENSG00000116171	SCP2	A6NM69; B4DGJ9; B4DHP6; C9JC79; D3DQ37; E1B6W5; F2Z3J1; hsa:6342; P22307; Q15432; Q16622; Q5VVZ1; Q6NXF4; Q99430	PPAR-alpha pathway; Nuclear receptors meta-pathway; Mitochondrial long chain fatty acid beta-oxidation; PPAR signaling pathway; Neurodegeneration with brain iron accumulation (NBIA) subtypes pathway; Mitochondrial fatty acid oxidation disorders; DNA damage response (only ATM dependent)	TYSND1 cleaves peroxisomal proteins; alpha-linolenic acid (ALA) metabolism	10	0	0.994	0.667153	0.948202	72.49	127.4	72.6	47.54	66.49	High	High	High	High	High	High	1
FALSE	High	Master Protein	Q8N335	Glycerol-3-phosphate dehydrogenase 1-like protein [OS=Homo sapiens]	0	71.595	60	16	94	16	351	38.4	7.02	224.02	16	other metabolic processes;other biological processes	plasma membrane;other membranes;cytosol;other cell component	other molecular function	Pf01210, Pf07479	23171	ENSG00000152642	GPD1L	A8K9U3; hsa:23171; Q14702; Q8N335; Q9BRM5	Sudden infant death syndrome (SIDS) susceptibility pathways	Synthesis of PA	2	0	0.727	0.504321	0.90517	66.12	98.1	101.9	51.54	38.02	High	High	High	High	High	High	1
FALSE	High	Master Protein	Q9H4M9	EH domain-containing protein 1 [OS=Homo sapiens]	0	95.148	53	17	94	13	534	60.6	6.83	238.12	17	cell organization and biogenesis;transport;developmental processes;other biological processes	plasma membrane;other membranes;other cytoplasmic organelle;other cell component	other molecular function	Pf00350, Pf12763, Pf16880, Pf18150	10938	ENSG00000110047	EHD1	hsa:10938; O14611; Q2M3Q4; Q9H4M9; Q9UNR3	Insulin signaling	Factors involved in megakaryocyte development and platelet production	2	2	0.671	0.434398	0.888519	73.03	85.2	114.8	43.52	69.05	High	High	High	High	High	High	1	Acetyl [N-Term]
FALSE	High	Master Protein	Q07507	Dermatopontin [OS=Homo sapiens]	0	50.846	51	7	94	7	201	24	4.82	272.59	7	cell adhesion;cell organization and biogenesis;other biological processes		extracellular structural activity	Pf14704	1805	ENSG00000143196	DPT	A8K981; hsa:1805; Q07507; Q8N4R2; Q9UIX8			0	0	0.537	0.0837746	0.457802	118.16	59.3	140.7	101.9	30.87	High	High	High	High	High	High	1
FALSE	High	Master Protein	P51991	Heterogeneous nuclear ribonucleoprotein A3 [OS=Homo sapiens]	0	94.402	49	17	93	17	378	39.6	9.01	233.89	17	RNA metabolism OR transcription;other metabolic processes	nucleus;other cell component	nucleic acid binding activity	Pf00076	220988	ENSG00000170144	HNRNPA3	D3DPF4; hsa:220988; P51991; Q53RW7; Q6URK5		mRNA Splicing - Major Pathway; Processing of Capped Intron-Containing Pre-mRNA	2	0	1.613	0.0433981	0.313531	100.4	135.1	64.9	19.08	89.11	High	High	High	High	High	High	1	Acetyl [N-Term]
FALSE	High	Master Protein	P82909	Alpha-ketoglutarate dehydrogenase component 4 [OS=Homo sapiens]	0	52.478	70	6	92	6	103	11.5	9.99	232.55	6	other metabolic processes	other membranes;mitochondrion			92259	ENSG00000134056; ENSG00000278461	KGD4	hsa:92259; P82909; Q9H2H4		Mitochondrial translation initiation; Mitochondrial translation elongation; Mitochondrial translation termination	3	0	0.952	0.7821	0.97229	75.24	101.1	98.9	41.32	67.57	High	High	High	High	High	High	1
FALSE	High	Master Protein	Q15942	Zyxin [OS=Homo sapiens]	0	92.581	39	12	92	12	572	61.2	6.67	259.63	12	cell adhesion;cell-cell signaling;cell organization and biogenesis;stress response;signal transduction	plasma membrane;other membranes;cytosol;cytoskeleton;nucleus;other cell component	other molecular function	Pf00412	7791	ENSG00000159840; ENSG00000285443	ZYX	A4D2G6; B4DQX7; hsa:7791; Q15942; Q6I9S4	Integrin-mediated cell adhesion; Focal adhesion		2	0	0.962	0.75447	0.968139	50.13	102.7	97.3	5.25	15.89	High	High	High	High	High	High	1
FALSE	High	Master Protein	Q15121	Astrocytic phosphoprotein PEA-15 [OS=Homo sapiens]	0	43.542	60	7	92	7	130	15	5.02	247.45	7	transport;signal transduction;other biological processes	cytosol;cytoskeleton;nucleus;other cell component		Pf01335	8682	ENSG00000162734	PEA15	B1AKZ3; hsa:8682; O00511; Q15121	Apoptosis modulation and signaling	RAF/MAP kinase cascade; RAF-independent MAPK1/3 activation	3	0	0.649	0.28143	0.781135	66.68	81	119	45.13	31.09	High	High	High	High	High	High	1
FALSE	High	Master Protein	Q8N8N7	Prostaglandin reductase 2 [OS=Homo sapiens]	0	68.47	55	12	92	12	351	38.5	5.41	226.24	12	other metabolic processes	other cell component	other molecular function	Pf00107, Pf16884	145482	ENSG00000140043	PTGR2	hsa:145482; Q3L8A4; Q6MZH8; Q8N8N7	Eicosanoid metabolism via cyclooxygenases (COX); Eicosanoid metabolism via lipooxygenases (LOX); Omega-6-fatty acids in senescence	Synthesis of Prostaglandins (PG) and Thromboxanes (TX)	4	0	1.208	0.265706	0.766107	80.17	118.6	81.4	44.28	68.9	High	High	High	High	High	High	1
FALSE	High	Master Protein	P04632	Calpain small subunit 1 [OS=Homo sapiens]	0	63.405	47	8	92	8	268	28.3	5.2	242.41	8	protein metabolism;other biological processes	plasma membrane;other membranes;cytosol;other cell component	other molecular function		826	ENSG00000126247	CAPNS1	A8K0P1; hsa:826; P04632; Q8WTX3; Q96EW0	Integrin-mediated cell adhesion	Formation of the cornified envelope; Degradation of the extracellular matrix; Deregulated CDK5 triggers multiple neurodegenerative pathways in Alzheimer's disease models	4	0	0.548	0.144111	0.619315	63.95	71.3	128.7	14.65	38.48	High	High	High	High	High	High	1	Acetyl [N-Term]
FALSE	High	Master Protein	P43121	Cell surface glycoprotein MUC18 [OS=Homo sapiens]	0	92.766	35	17	92	17	646	71.6	5.76	265.37	17	cell adhesion;stress response;developmental processes;other biological processes	non-structural extracellular;plasma membrane;other membranes		Pf07686, Pf08205, Pf13927	4162	ENSG00000076706	MCAM	hsa:4162; O95812; P43121; Q59E86; Q6PHR3; Q6ZTR2		RHOC GTPase cycle; RHOA GTPase cycle; RAC1 GTPase cycle; RHOG GTPase cycle; RAC2 GTPase cycle; RAC3 GTPase cycle; RHOB GTPase cycle; RHOD GTPase cycle; RHOF GTPase cycle	9	0	1.505	0.0821276	0.4555	49.97	131.1	68.9	33.69	12.74	High	High	High	High	High	High	1
FALSE	High	Master Protein	O14974	Protein phosphatase 1 regulatory subunit 12A [OS=Homo sapiens]	0	89.996	23	22	91	20	1030	115.2	5.4	205.15	22	cell cycle OR cell proliferation;cell organization and biogenesis;protein metabolism;other metabolic processes;signal transduction;other biological processes	plasma membrane;other membranes;cytosol;cytoskeleton;nucleus;other cell component	enzyme regulator activity;other molecular function	Pf00023, Pf15898	4659	ENSG00000058272	PPP1R12A	B4DZ09; F8VWB4; hsa:4659; O14974; Q2NKL4; Q569H0; Q86WU3; Q8NFR6; Q9BYH0	Focal adhesion; Hippo-Merlin signaling dysregulation; Regulation of actin cytoskeleton	Regulation of PLK1 Activity at G2/M Transition; RHO GTPases activate CIT; RHO GTPases activate PKNs; RHO GTPases Activate ROCKs; RHO GTPases activate PAKs	8	0	0.839	0.909479	0.994751	46.3	90.5	109.5	15.25	48.76	High	High	High	High	High	High	1
FALSE	High	Master Protein	Q9Y2D5	A-kinase anchor protein 2 [OS=Homo sapiens]	0	99.884	43	20	91	20	859	94.6	5.11	244.77	20											0	0	0.922	0.864546	0.988397	73.49	111.6	88.4	36.09	45.57	High	High	High	High	High	High	1
FALSE	High	Master Protein	Q99729	Heterogeneous nuclear ribonucleoprotein A/B [OS=Homo sapiens]	0	42.523	24	9	91	8	332	36.2	8.21	243.85	9	RNA metabolism OR transcription;other metabolic processes;other biological processes	nucleus;other cell component	nucleic acid binding activity	Pf00076, Pf08143	3182	ENSG00000197451	HNRNPAB	B3KNN5; D3DWP7; hsa:3182; Q04150; Q8N7U3; Q99729; Q9BQ99	Pre-implantation embryo; mRNA processing		2	0	0.994	0.690208	0.954938	67.89	87.5	112.5	19.29	22.87	High	High	High	High	High	High	1
FALSE	High	Master Protein	P02100	Hemoglobin subunit epsilon [OS=Homo sapiens]	0	14.976	18	3	91	1	147	16.2	8.63	210.56	3	other metabolic processes;transport;other biological processes	cytosol;other cell component	other molecular function	Pf00042	3046	ENSG00000213931	HBE1	hsa:3046; P02100; Q6FH44		Factors involved in megakaryocyte development and platelet production	1	0	1.695	0.0776214	0.442939	255.71	125.8	74.2	122.34		High	Peak Found	Not Found	Not Found	Not Found	Peak Found	1
FALSE	High	Master Protein	Q9H0W9	Ester hydrolase C11orf54 [OS=Homo sapiens]	0	68.64	51	10	90	10	315	35.1	6.7	246.93	10		nucleus	other molecular function	Pf08925	28970	ENSG00000182919	C11orf54	A8K850; hsa:28970; Q6FI88; Q6XYB0; Q96EI3; Q96IX1; Q9H0W9; Q9Y6B4			0	0	0.856	0.94524	0.996797	63.6	88	112	16.83	44.74	High	High	High	High	High	High	1
FALSE	High	Master Protein	P13645	Keratin, type I cytoskeletal 10 [OS=Homo sapiens]	0	114.575	35	20	90	17	584	58.8	5.21	228.48	20	cell organization and biogenesis;protein metabolism;other metabolic processes;other biological processes	plasma membrane;cytosol;cytoskeleton;other cell component	bone, tooth or skin structural activity;other molecular function	Pf00038	3858	ENSG00000186395	KRT10	hsa:3858; P13645; Q14664; Q8N175		Formation of the cornified envelope	2	4	0.813	0.783172	0.97229	113.3	111.3	88.7	71.82	103.84	High	High	High	High	High	High	1
FALSE	High	Master Protein	P35754	Glutaredoxin-1 [OS=Homo sapiens]	0	54.292	71	5	90	5	106	11.8	8.09	286.09	5	other metabolic processes;other biological processes	cytosol;nucleus	other molecular function	Pf00462	2745	ENSG00000173221	GLRX	B2R4L2; hsa:2745; P35754; Q3KQS1; Q6ICT1	One-carbon metabolism	Interconversion of nucleotide di- and triphosphates	2	0	1.314	0.159014	0.650044	84.02	130.6	69.4	56.52	36.74	High	High	High	High	High	High	1
TRUE	High	Master Protein	Q00610	Clathrin heavy chain 1 [OS=Homo sapiens]	0	122.367	27	32	90	32	1675	191.5	5.69	222.14	32	cell cycle OR cell proliferation;cell organization and biogenesis;other metabolic processes;transport;other biological processes	plasma membrane;other membranes;cytosol;cytoskeleton;ER/Golgi;other cytoplasmic organelle;other cell component	signal transduction activity or receptor binding;nucleic acid binding activity;other molecular function	Pf00637, Pf01394, Pf09268, Pf13838	1213	ENSG00000141367	CLTC	D3DU00; hsa:1213; Q00610; Q6N0A0; Q86TF2	Synaptic vesicle pathway; VEGFA-VEGFR2 signaling; Dengue-2 interactions with complement and coagulation cascades; Ebola virus infection in host; Fragile X syndrome; 7q11.23 copy number variation syndrome; Complement and coagulation cascades	ALK mutants bind TKIs; Signaling by ALK fusions and activated point mutants; Recycling pathway of L1; MHC class II antigen presentation; RHOV GTPase cycle; Lysosome Vesicle Biogenesis; RHOU GTPase cycle; Cargo recognition for clathrin-mediated endocytosis; WNT5A-dependent internalization of FZD4; EPH-ephrin mediated repulsion of cells; LDL clearance; Retrograde neurotrophin signalling; WNT5A-depe…	25	0	0.465	0.046027	0.325913	86.64	48.4	151.6	89.71	79.97	High	High	High	High	High	High	1
TRUE	High	Master Protein	P55786	Puromycin-sensitive aminopeptidase [OS=Homo sapiens]	0	99.142	40	26	90	26	919	103.2	5.72	208.73	26	protein metabolism;other metabolic processes;stress response	cytosol;nucleus;other cell component	other molecular function	Pf01433, Pf11838, Pf17900	9520	ENSG00000141279	NPEPPS	B7Z463; hsa:9520; P55786; Q6P145; Q9NP16; Q9UEM2		Antigen processing: Ubiquitination & Proteasome degradation	1	0	0.465	0.0399889	0.297894	56.02	66.7	133.3	50.59	34.75	High	High	High	High	High	High	1
TRUE	High	Master Protein	O60240	Perilipin-1 [OS=Homo sapiens]	0	120.318	55	22	90	22	522	56	6.42	235.42	22	other metabolic processes;stress response	cytosol;ER/Golgi;other cell component	other molecular function	Pf03036	5346	ENSG00000166819	PLIN1	hsa:5346; O60240; Q8N5Y6	Adipogenesis; PPAR signaling pathway; Lipid metabolism pathway; Thermogenesis; Thyroid hormones production and peripheral downstream signaling effects; Familial partial lipodystrophy	Transcriptional regulation of white adipocyte differentiation; Triglyceride catabolism; NR1H2 & NR1H3 regulate gene expression linked to triglyceride lipolysis in adipose	9	0	2.696	8.99988e-05	0.00216733	111.55	161	39	79.2	118.9	High	High	High	Peak Found	High	High	1
FALSE	High	Master Protein	P05141	ADP/ATP translocase 2 [OS=Homo sapiens]	0	41.217	37	11	89	4	298	32.8	9.69	176.25	11	cell cycle OR cell proliferation;cell organization and biogenesis;other metabolic processes;transport;other biological processes	plasma membrane;other membranes;cytoskeleton;mitochondrion	transporter activity;other molecular function	Pf00153	292	ENSG00000005022	SLC25A5	B2RCV1; hsa:292; O43350; P05141	Electron transport chain: OXPHOS system in mitochondria; Alzheimer's disease and miRNA effects; Alzheimer's disease	Transport of nucleosides and free purine and pyrimidine bases across the plasma membrane; Mitochondrial protein degradation; Vpr-mediated induction of apoptosis by mitochondrial outer membrane permeabilization	6	0	0.682	0.526501	0.91215	52.62	73.4	126.6	55.26	36.42	High	High	High	High	High	High	1
FALSE	High	Master Protein	P20073	Annexin A7 [OS=Homo sapiens]	0	76.863	37	17	89	17	488	52.7	5.68	196.7	17	other metabolic processes;other biological processes	other membranes;ER/Golgi;nucleus;other cell component	signal transduction activity or receptor binding;other molecular function	Pf00191	310	ENSG00000138279	ANXA7	hsa:310; P20073; Q5F2H3; Q5T0M6; Q5T0M7			0	0	0.71	0.44937	0.897099	44.71	94.9	105.1	33	20.16	High	High	High	High	High	High	1
TRUE	High	Master Protein	P30153	Serine/threonine-protein phosphatase 2A 65 kDa regulatory subunit A alpha isoform [OS=Homo sapiens]	0	90.386	45	20	89	20	589	65.3	5.11	218.58	20	cell cycle OR cell proliferation;cell organization and biogenesis;protein metabolism;RNA metabolism OR transcription;other metabolic processes;other biological processes	plasma membrane;other membranes;cytosol;cytoskeleton;mitochondrion;nucleus;other cell component	enzyme regulator activity;other molecular function	Pf02985	5518	ENSG00000105568	PPP2R1A	hsa:5518; P30153; Q13773; Q6ICQ3; Q96DH3	Focal adhesion: PI3K-Akt-mTOR-signaling pathway; Wnt signaling pathway and pluripotency; PI3K-Akt signaling pathway; 16p11.2 proximal deletion syndrome; Glycogen synthesis and degradation; Cohesin complex - Cornelia de Lange syndrome	Separation of Sister Chromatids; PKR-mediated signaling; Negative regulation of MAPK pathway; Resolution of Sister Chromatid Cohesion; Recruitment of NuMA to mitotic centrosomes; RHO GTPases Activate Formins; EML4 and NUDC in mitotic spindle formation; Regulation of PLK1 Activity at G2/M Transition; Loss of Nlp from mitotic centrosomes; Recruitment of mitotic centrosome proteins and complexes; An…	50	0	0.438	0.0166053	0.168206	71.52	53.7	146.3	51.63	35.98	High	High	High	High	High	High	1
FALSE	High	Master Protein	P62993	Growth factor receptor-bound protein 2 [OS=Homo sapiens]	0	42.889	52	9	88	9	217	25.2	6.32	168.45	9	cell organization and biogenesis;stress response;transport;developmental processes;signal transduction;other biological processes	plasma membrane;other membranes;cytosol;ER/Golgi;nucleus;other cytoplasmic organelle;other cell component	signal transduction activity or receptor binding;enzyme regulator activity;other molecular function	Pf00017, Pf00018	2885	ENSG00000177885	GRB2	hsa:2885; P29354; P62993; Q14450; Q63057; Q63059	IL-5 signaling pathway; Integrin-mediated cell adhesion; Leptin signaling pathway; Prolactin signaling pathway; IL-9 signaling pathway; Pilocytic astrocytoma; Glioblastoma signaling pathways; Androgen receptor network in prostate cancer; B cell receptor signaling pathway; TNF-alpha signaling pathway; Interleukin-11 signaling pathway; Oncostatin M signaling pathway; Brain-derived neurotrophic fact…	Signaling by ALK fusions and activated point mutants; Signaling by CSF3 (G-CSF); Signaling by FLT3 ITD and TKD mutants; STAT5 activation downstream of FLT3 ITD mutants; Interleukin-15 signaling	73	0	0.917	0.882471	0.989693	71.79	108.2	91.8	51.55	47.2	High	High	High	High	High	High	1
FALSE	High	Master Protein	P42126	Enoyl-CoA delta isomerase 1, mitochondrial [OS=Homo sapiens]	0	58.853	44	9	88	9	302	32.8	8.54	249.58	9	other metabolic processes	mitochondrion	other molecular function	Pf00378	1632	ENSG00000167969	ECI1	A8K512; hsa:1632; P42126; Q13290; Q7Z2L6; Q7Z2L7; Q9BUB8; Q9BW05; Q9UDG6	Fatty acid beta-oxidation; Mitochondrial long chain fatty acid beta-oxidation; Mitochondrial fatty acid oxidation disorders	Mitochondrial protein degradation; mitochondrial fatty acid beta-oxidation of unsaturated fatty acids	5	0	0.758	0.601986	0.93383	52.49	98.3	101.7	64.67	29	High	High	High	High	High	High	1
FALSE	High	Master Protein	Q9UMX5	Neudesin [OS=Homo sapiens]	0	68.413	59	9	88	9	172	18.8	5.69	272.95	9	signal transduction;other biological processes	non-structural extracellular;other membranes;mitochondrion;ER/Golgi;other cell component	signal transduction activity or receptor binding;other molecular function	Pf00173	29937	ENSG00000117691	NENF	A1KYQ8; hsa:29937; Q53FZ6; Q5TM90; Q9UMX5			0	0	0.743	0.553831	0.923641	75.31	96.5	103.5	56.31	52	High	High	High	High	High	High	1
FALSE	High	Master Protein	Q8NBS9	Thioredoxin domain-containing protein 5 [OS=Homo sapiens]	0	56.271	39	14	88	14	432	47.6	5.97	168.9	14	protein metabolism;other metabolic processes;other biological processes	non-structural extracellular;ER/Golgi;other cytoplasmic organelle	other molecular function	Pf00085	81567	ENSG00000239264	TXNDC5	B2RDM2; hsa:81567; Q5TCQ0; Q8NBS9; Q8ND33; Q8TCT2; Q9BVH9	VEGFA-VEGFR2 signaling	Neutrophil degranulation; Lysosome Vesicle Biogenesis; Golgi Associated Vesicle Biogenesis	4	0	1.087	0.469266	0.898926	63.01	104.8	95.2	37.97	51.16	High	High	High	High	High	High	1
TRUE	High	Master Protein	Q9UBF9	Myotilin [OS=Homo sapiens]	0	106.334	62	21	88	21	498	55.4	9.07	223.52	21	cell adhesion;cell organization and biogenesis;developmental processes;other biological processes	plasma membrane;other membranes;cytoskeleton;other cell component	cytoskeletal activity;other molecular function	Pf07679	9499	ENSG00000120729	MYOT	A0A4R6; B4DT79; hsa:9499; Q9UBF9			0	0	2.275	0.000761967	0.0143018	77.14	154.5	45.5	45.96	101.7	High	High	High	High	Peak Found	High	1
FALSE	High	Master Protein	Q15293	Reticulocalbin-1 [OS=Homo sapiens]	0	65.939	49	12	87	12	331	38.9	5	196.29	12	developmental processes	ER/Golgi	other molecular function	Pf13202	5954	ENSG00000049449	RCN1	B7Z1M1; D3DR00; hsa:5954; Q15293	VEGFA-VEGFR2 signaling	Regulation of Insulin-like Growth Factor (IGF) transport and uptake by Insulin-like Growth Factor Binding Proteins (IGFBPs); Post-translational protein phosphorylation	3	0	0.841	0.907113	0.994751	64.06	80.8	119.2	46.13	3.53	High	High	High	High	High	High	1
FALSE	High	Master Protein	P05387	60S acidic ribosomal protein P2 [OS=Homo sapiens]	0	51.515	77	6	87	6	115	11.7	4.54	268	6	protein metabolism;other metabolic processes	cytosol;translational apparatus;other cell component	other molecular function	Pf00428	6181	ENSG00000177600	RPLP2	hsa:6181; P05387; Q6FG96	VEGFA-VEGFR2 signaling; Cytoplasmic ribosomal proteins; Opioid receptor pathways	Regulation of expression of SLITs and ROBOs; L13a-mediated translational silencing of Ceruloplasmin expression; Formation of a pool of free 40S subunits; GTP hydrolysis and joining of the 60S ribosomal subunit; Major pathway of rRNA processing in the nucleolus and cytosol; Nonsense Mediated Decay (NMD) enhanced by the Exon Junction Complex (EJC); SRP-dependent cotranslational protein targeting to…	16	0	0.941	0.811854	0.974118	57.26	92.4	107.6	43.58	31.15	High	High	High	High	High	High	1
FALSE	High	Master Protein	O95865	N(G),N(G)-dimethylarginine dimethylaminohydrolase 2 [OS=Homo sapiens]	0	55.302	50	9	87	8	285	29.6	6.01	236.77	9	other metabolic processes;other biological processes	cytosol;mitochondrion	other molecular function		23564	ENSG00000206395; ENSG00000213722; ENSG00000225635; ENSG00000226634; ENSG00000227317; ENSG00000228128; ENSG00000233076	DDAH2	A2BEZ7; hsa:23564; O95865	Nitric oxide metabolism in cystic fibrosis		1	0	1.063	0.505593	0.90517	54.69	98.7	101.3	38.33	34.23	High	High	High	High	High	High	1
FALSE	High	Master Protein	P55795	Heterogeneous nuclear ribonucleoprotein H2 [OS=Homo sapiens]	0	69.935	39	11	87	6	449	49.2	6.3	210.32	11	other biological processes	cytosol;nucleus;other cell component		Pf00076, Pf08080	3188	ENSG00000126945	HNRNPH2	A1L400; P55795; Q9HHA7	mRNA processing	mRNA Splicing - Major Pathway; Processing of Capped Intron-Containing Pre-mRNA	3	0	1.064	0.50505	0.90517	54.65	107.8	92.2	30.09	40.86	High	High	High	High	High	High	1
FALSE	High	Master Protein	Q9NQR4	Omega-amidase NIT2 [OS=Homo sapiens]	0	83.674	71	13	86	13	276	30.6	7.21	240.92	13	other metabolic processes	non-structural extracellular;cytosol;cytoskeleton;other cell component	other molecular function	Pf00795	56954	ENSG00000114021	NIT2	B2R9A3; D3DN47; hsa:56954; Q8WUF0; Q9NQR4		Neutrophil degranulation	1	0	0.971	0.728559	0.96114	80.97	131.1	68.9	31.39	59.29	High	High	High	High	High	High	1
FALSE	High	Master Protein	P30626	Sorcin [OS=Homo sapiens]	0	56.958	56	13	86	13	198	21.7	5.59	215.54	13	transport;developmental processes;signal transduction;other biological processes	non-structural extracellular;plasma membrane;other membranes;cytosol;cytoskeleton;ER/Golgi;nucleus;other cell component	signal transduction activity or receptor binding;other molecular function	Pf13499, Pf13833	6717	ENSG00000075142	SRI	A8MTH6; B4DKK2; D6W5Q0; hsa:6717; P30626		Stimuli-sensing channels; Ion homeostasis; Ion transport by P-type ATPases; Reduction of cytosolic Ca++ levels; Sodium/Calcium exchangers	5	0	0.974	0.720147	0.960029	41.26	96.3	103.7	27.74	26.09	High	High	High	High	High	High	1
FALSE	High	Master Protein	P14174	Macrophage migration inhibitory factor [OS=Homo sapiens]	0	20.691	37	3	86	3	115	12.5	7.88	209.25	3	cell organization and biogenesis;other metabolic processes;stress response;signal transduction;other biological processes	non-structural extracellular;plasma membrane;other membranes;cytosol;nucleus;other cell component	signal transduction activity or receptor binding;other molecular function	Pf01187	4282	ENSG00000240972; ENSG00000276701	MIF	A5Z1R8; B2R4S3; hsa:4282; P14174; Q2V4Y5; Q6FHV0	Adipogenesis; Spinal cord injury; HDAC6 interactions in the central nervous system	Neutrophil degranulation; Cell surface interactions at the vascular wall; Gene and protein expression by JAK-STAT signaling after Interleukin-12 stimulation	6	0	0.774	0.653205	0.943477	70.76	61.3	138.7	78.49	90.17	High	High	High	High	High	High	1
FALSE	High	Master Protein	P07919	Cytochrome b-c1 complex subunit 6, mitochondrial [OS=Homo sapiens]	0	41.418	67	5	86	5	91	10.7	4.44	259.54	5	other metabolic processes;transport	other membranes;mitochondrion	transporter activity	Pf02320	7388	ENSG00000173660	UQCRH	B2R4V9; D3DQ18; hsa:7388; P07919; Q5TDF6; Q6LDB8; Q9BQ91	Electron transport chain: OXPHOS system in mitochondria; Nonalcoholic fatty liver disease; Mitochondrial complex III assembly	Respiratory electron transport	4	0	0.643	0.272262	0.770857	89.45	69.6	130.4	81.68	36.04	High	High	High	High	High	High	1
FALSE	High	Master Protein	P50552	Vasodilator-stimulated phosphoprotein [OS=Homo sapiens]	0	81.682	46	16	86	16	380	39.8	8.94	227.33	16	cell organization and biogenesis;developmental processes	plasma membrane;other membranes;cytosol;cytoskeleton;other cell component	cytoskeletal activity;other molecular function	Pf00568, Pf08776	7408	ENSG00000125753	VASP	B2RBT9; hsa:7408; P50552; Q6PIZ1; Q93035	Integrin-mediated cell adhesion; Focal adhesion	Generation of second messenger molecules; Signaling by ROBO receptors; Cell-extracellular matrix interactions	5	0	1.317	0.188735	0.674339	78.18	122.9	77.1	12.16	76.85	High	High	High	High	High	High	1
FALSE	High	Master Protein	O15382	Branched-chain-amino-acid aminotransferase, mitochondrial [OS=Homo sapiens]	0	74.451	43	15	86	15	392	44.3	8.65	218.25	15	other metabolic processes;other biological processes	mitochondrion;nucleus	other molecular function	Pf01063	587	ENSG00000105552	BCAT2	B2RB87; hsa:587; O00269; O15382; Q96KG1; Q9BTB6; Q9BUU6	Trans-sulfuration, one-carbon metabolism and related pathways; One-carbon metabolism and related pathways	Branched-chain amino acid catabolism	3	0	0.461	0.0574629	0.366866	86.35	64.6	135.4	43.59	70.66	High	High	High	High	High	High	1
FALSE	High	Master Protein	O94760	N(G),N(G)-dimethylarginine dimethylaminohydrolase 1 [OS=Homo sapiens]	0	71.814	71	15	85	14	285	31.1	5.81	199.74	15	other metabolic processes;signal transduction;other biological processes	cytosol	other molecular function	Pf19420	23576	ENSG00000153904	DDAH1	hsa:23576; O94760; Q5HYC8; Q86XK5	Mesodermal commitment pathway; Nitric oxide metabolism in cystic fibrosis	eNOS activation	3	1	0.881	0.996234	0.999898	79.9	113.6	86.4	32.18	42.36	High	High	High	High	High	High	1
FALSE	High	Master Protein	Q14157	Ubiquitin-associated protein 2-like [OS=Homo sapiens]	0	91.489	24	15	85	15	1087	114.5	7.11	252.97	15	cell organization and biogenesis;other biological processes	nucleus;other cell component		Pf12478	9898	ENSG00000143569	UBAP2L	B4E0U8; hsa:9898; Q14157; Q5VU75; Q5VU76; Q9BTU3; Q9UGL2; Q9UGL3; Q9UGL4; Q9UGL5	VEGFA-VEGFR2 signaling		1	0	0.703	0.494078	0.903802	72.74	83.3	116.7	46.71	53.56	High	High	High	High	High	High	1
FALSE	High	Master Protein	Q9HAV7	GrpE protein homolog 1, mitochondrial [OS=Homo sapiens]	0	61.233	54	11	85	11	217	24.3	8.12	212.82	11	protein metabolism;other metabolic processes;transport	other membranes;mitochondrion;nucleus	other molecular function	Pf01025	80273	ENSG00000109519	GRPEL1	B2R783; hsa:80273; Q549M6; Q9HAV7		Mitochondrial protein import	1	0	1.152	0.343558	0.832585	64.66	121.1	78.9	31.12	52.32	High	High	High	High	High	High	1
FALSE	High	Master Protein	Q9H7Z7	Prostaglandin E synthase 2 [OS=Homo sapiens]	0	72.438	51	13	85	13	377	41.9	9.16	234.53	13	other metabolic processes;transport;other biological processes	non-structural extracellular;other membranes;cytosol;mitochondrion;ER/Golgi;nucleus;other cytoplasmic organelle;other cell component	nucleic acid binding activity;other molecular function	Pf13410, Pf13417	80142	ENSG00000148334	PTGES2	hsa:80142; Q53EW9; Q5SYV6; Q96GI0; Q96GL2; Q9H7Z7	Relationship between inflammation, COX-2 and EGFR; Omega-6-fatty acids in senescence	Neutrophil degranulation; Synthesis of Prostaglandins (PG) and Thromboxanes (TX)	4	0	0.625	0.289632	0.784499	58.8	80.7	119.3	62.76	2.41	High	High	High	High	High	High	1
FALSE	High	Master Protein	P50895	Basal cell adhesion molecule [OS=Homo sapiens]	0	85.449	40	18	85	18	628	67.4	5.81	205.74	18	cell adhesion;signal transduction	plasma membrane;other membranes	other molecular function	Pf07686, Pf08205, Pf13895, Pf13927	4059	ENSG00000187244	BCAM	A8MYF9; A9YWT5; A9YWT6; hsa:4059; P50895; Q86VC7			0	0	0.606	0.246106	0.740833	65.41	69.5	130.5	54.56	5.83	High	High	High	High	High	High	1
FALSE	High	Master Protein	Q16851	UTP--glucose-1-phosphate uridylyltransferase [OS=Homo sapiens]	0	84.214	34	15	85	15	508	56.9	8.15	228.2	15	other metabolic processes;developmental processes	cytosol;other cell component	other molecular function	Pf01704	7360	ENSG00000169764	UGP2	hsa:7360; Q07131; Q0P6K2; Q16851; Q86Y81; Q9BU15	Exercise-induced circadian regulation; Glycogen synthesis and degradation; Glucuronidation	Glycogen synthesis; Formation of the active cofactor, UDP-glucuronate	5	0	0.611	0.20386	0.69042	59.79	71.6	128.4	50.43	5	High	High	High	High	High	High	1
FALSE	High	Master Protein	P54578	Ubiquitin carboxyl-terminal hydrolase 14 [OS=Homo sapiens]	0	97.885	47	18	85	18	494	56	5.3	199.34	18	cell-cell signaling;protein metabolism;other metabolic processes;stress response;other biological processes	plasma membrane;other membranes;cytosol;other cell component	enzyme regulator activity;other molecular function	Pf00443	9097	ENSG00000101557	USP14	B7Z4N8; hsa:9097; J3QRZ5; P54578; Q53XY5		Ub-specific processing proteases; Regulation of NF-kappa B signaling	2	0	0.571	0.1959	0.683152	65.8	75.8	124.2	16	24.42	High	High	High	High	High	High	1
FALSE	High	Master Protein	P27144	Adenylate kinase 4, mitochondrial [OS=Homo sapiens]	0	65.991	63	10	85	10	223	25.3	8.4	242.84	10	other metabolic processes;stress response;other biological processes	mitochondrion;other cell component	kinase activity;other molecular function	Pf00406, Pf05191	205	ENSG00000162433	AK4	B2R927; D3DQ62; hsa:205; P27144; Q6IBH4; Q6NXQ5; Q8IUU9	CCL18 signaling pathway	Interconversion of nucleotide di- and triphosphates	2	0	1.45	0.0792184	0.447136	80.7	139.2	60.8	39.28	78.09	High	High	High	High	High	High	1
FALSE	High	Master Protein	P31942	Heterogeneous nuclear ribonucleoprotein H3 [OS=Homo sapiens]	0	83.468	55	11	84	10	346	36.9	6.87	217.56	11	RNA metabolism OR transcription;other metabolic processes;other biological processes	nucleus;other cell component		Pf00076	3189	ENSG00000096746	HNRNPH3	A8K682; B3KRE1; hsa:3189; P31942; Q9BSX1; Q9NP53; Q9NP96; Q9NPA7; Q9NPI4; Q9UFU4; Q9Y4J5			0	0	0.836	0.857769	0.986254	72.56	101.6	98.4	35.54	35.07	High	High	High	High	High	High	1
FALSE	High	Master Protein	P13073	Cytochrome c oxidase subunit 4 isoform 1, mitochondrial [OS=Homo sapiens]	0	48.867	43	10	84	10	169	19.6	9.51	195.04	10	other metabolic processes;transport	other membranes;cytosol;mitochondrion;nucleus	transporter activity	Pf02936	1327	ENSG00000131143	COX4I1	B2R4J2; D3DUM7; hsa:1327; P13073; Q6P666	Electron transport chain: OXPHOS system in mitochondria; Nonalcoholic fatty liver disease; Mitochondrial complex IV assembly; 5q35 copy number variation	Respiratory electron transport; TP53 Regulates Metabolic Genes; Cytoprotection by HMOX1; Mitochondrial protein degradation	8	0	0.781	0.676557	0.951816	61.99	92.1	107.9	49.03	14.44	High	High	High	High	High	High	1
FALSE	High	Master Protein	O75521	Enoyl-CoA delta isomerase 2 [OS=Homo sapiens]	0	72.599	47	12	84	12	394	43.6	9	246.16	12	other metabolic processes	cytosol;mitochondrion;other cytoplasmic organelle;other cell component	other molecular function	Pf00378, Pf00887	10455	ENSG00000198721	ECI2	hsa:10455; O75521; Q5JYK5; Q5JYK7; Q7L124; Q8N0X0; Q9BUE9; Q9H0T9; Q9NQH1; Q9NYH7; Q9UN55			0	0	0.749	0.620752	0.937983	77.82	97.2	102.8	50.66	47.11	High	High	High	High	High	High	1
TRUE	High	Master Protein	P00918	Carbonic anhydrase 2 [OS=Homo sapiens]	0	96.398	64	13	84	13	260	29.2	7.4	244.31	13	other metabolic processes;transport;signal transduction;other biological processes	plasma membrane;other membranes;cytosol;other cell component	other molecular function	Pf00194	760	ENSG00000104267	CA2	B2R7G8; hsa:760; P00918; Q6FI12; Q96ET9	Proximal tubule transport	Reversible hydration of carbon dioxide; Erythrocytes take up carbon dioxide and release oxygen; Erythrocytes take up oxygen and release carbon dioxide	4	0	2.03	0.00611445	0.0830221	121.28	128.7	71.3	137.39	98.11	High	High	High	High	High	High	1
FALSE	High	Master Protein	P35241	Radixin [OS=Homo sapiens]	0	69.808	29	16	83	8	583	68.5	6.37	186.78	16	cell organization and biogenesis;signal transduction;other biological processes	plasma membrane;other membranes;cytoskeleton;other cell component	cytoskeletal activity;other molecular function	Pf00373, Pf00769, Pf09379, Pf09380, Pf20492	5962	ENSG00000137710	RDX	A7YIJ8; A7YIK0; A7YIK3; B7Z9U6; F5H1A7; hsa:5962; P35241; Q86Y61	Regulation of actin cytoskeleton	Recycling pathway of L1; Sensory processing of sound by inner hair cells of the cochlea; Sensory processing of sound by outer hair cells of the cochlea	4	0	0.885	0.954391	0.996892	51.07	75.5	124.5	28.03	20.59	High	High	High	High	High	High	1
FALSE	High	Master Protein	Q9UJZ1	Stomatin-like protein 2, mitochondrial [OS=Homo sapiens]	0	68.3	41	11	83	11	356	38.5	7.39	217	11	cell organization and biogenesis;protein metabolism;other metabolic processes;stress response;signal transduction;other biological processes	plasma membrane;other membranes;cytoskeleton;mitochondrion	signal transduction activity or receptor binding;other molecular function	Pf01145, Pf16200	30968	ENSG00000165283	STOML2	B4E1K7; D3DRN3; hsa:30968; O60376; Q53G29; Q96FY2; Q9P042; Q9UJZ1		Processing of SMDT1; Cellular response to mitochondrial stress	2	0	0.861	0.938711	0.995934	40.07	88.1	111.9	51.86	71.81	High	High	High	High	High	High	1
FALSE	High	Master Protein	P01019	Angiotensinogen [OS=Homo sapiens]	0	81.365	30	10	83	10	485	53.1	6.32	225.66	10	other biological processes	non-structural extracellular	enzyme regulator activity	Pf00079	183		AGT	A0A024R3V3; B0ZBE2	Physiological and pathological hypertrophy of the heart; MicroRNAs in cardiomyocyte hypertrophy; Adipogenesis; IL6 signaling pathway; Renin-angiotensin-aldosterone system (RAAS); SARS-CoV-2 and ACE2 receptor: molecular mechanisms; COVID-19 adverse outcome pathway; RAS and bradykinin pathways in COVID-19; ACE inhibitor pathway; Monoamine transport		10	0	0.672	0.40607	0.874983	99.23	91.7	108.3	39.91	130.45	High	High	High	High	High	High	1
FALSE	High	Master Protein	P24666	Low molecular weight phosphotyrosine protein phosphatase [OS=Homo sapiens]	0	61.979	68	10	83	10	158	18	6.74	245.55	10		plasma membrane;other membranes;cytosol;other cell component	other molecular function	Pf01451	52	ENSG00000143727	ACP1	A8K1L9; B5MCC7; hsa:52; P24666; P24667; Q16035; Q16036; Q16725; Q3KQX8; Q53RU0	VEGFA-VEGFR2 signaling		1	0	1.204	0.280747	0.781135	59.98	142.6	57.4	16.87	79.3	High	High	High	High	High	High	1
FALSE	High	Master Protein	Q8NI60	Atypical kinase COQ8A, mitochondrial [OS=Homo sapiens]	0	63.62	16	6	83	6	647	71.9	6.99	258.18	6	other metabolic processes	other membranes;mitochondrion	kinase activity;other molecular function	Pf03109	56997	ENSG00000163050	COQ8A	hsa:56997; Q5T7A5; Q63HK0; Q8NCJ6; Q8NI60; Q9HBQ1; Q9NQ67			0	0	1.946	0.0068579	0.0899277	81.29	148.5	51.5	9.42	39.95	High	High	High	High	High	High	1
FALSE	High	Master Protein	Q9UBQ7	Glyoxylate reductase/hydroxypyruvate reductase [OS=Homo sapiens]	0	78.176	45	11	82	11	328	35.6	7.39	239.65	11	other metabolic processes	cytosol;other cytoplasmic organelle;other cell component	other molecular function	Pf00389, Pf02826	9380	ENSG00000137106	GRHPR	hsa:9380; Q5T945; Q9H3E9; Q9H636; Q9UBQ7; Q9UKX1		Glyoxylate metabolism and glycine degradation	1	0	0.949	0.7848	0.97229	74.17	133.2	66.8	45.02	65.41	High	High	High	High	High	High	1
[truncated: 3,047 more rows]

## Sheet: LV vs LA
Checked	Protein FDR Confidence: Combined	Master	Accession	Description	Exp. q-value: Combined	Sum PEP Score	Coverage [%]	# Peptides	# PSMs	# Unique Peptides	# AAs	MW [kDa]	calc. pI	Score Sequest HT: Sequest HT	Coverage [%] (by Search Engine): Sequest HT	# Peptides (by Search Engine): Sequest HT	Biological Process	Cellular Component	Molecular Function	Pfam IDs	Entrez Gene ID	Ensembl Gene ID	Gene Symbol	Gene ID	Reactome Pathways	WikiPathways	# Protein Pathway Groups	# Razor Peptides	Abundance Ratio: (vent) / (atria)	Abundance Ratio P-Value: (vent) / (atria)	Abundance Ratio Adj. P-Value: (vent) / (atria)	Abundance Ratio Variability [%]: (vent) / (atria)	Abundances (Grouped): atria	Abundances (Grouped): vent	Abundances (Grouped) CV [%]: atria	Abundances (Grouped) CV [%]: vent	Abundance: F6: Sample, atria, 8	Abundance: F7: Sample, atria, 4	Abundance: F8: Sample, atria, 12	Abundance: F1: Sample, vent, 1	Abundance: F2: Sample, vent, 4	Abundance: F3: Sample, vent, 8	Abundance: F4: Sample, vent, 12	Found in Sample: [S6] F6: Sample, atria, 8	Found in Sample: [S7] F7: Sample, atria, 4	Found in Sample: [S8] F8: Sample, atria, 12	Found in Sample: [S1] F1: Sample, vent, 1	Found in Sample: [S2] F2: Sample, vent, 4	Found in Sample: [S3] F3: Sample, vent, 8
[truncated: 3,942 more rows]
[truncated: 3 more columns]
