# Supplementary material for: Atrial Fibrillation Induces Sarcomere Remodeling, Enhanced Sarcomere Contractility, and Loss of Atrial Identity
Source: Research Square preprint supplement (doi:10.21203/rs.3.rs-6422874/v1), 2025-04-23
Supplement: Supplementary file 3 [file 17a94c643bf5637ea1406687.docx]

**Myosin Gels:**


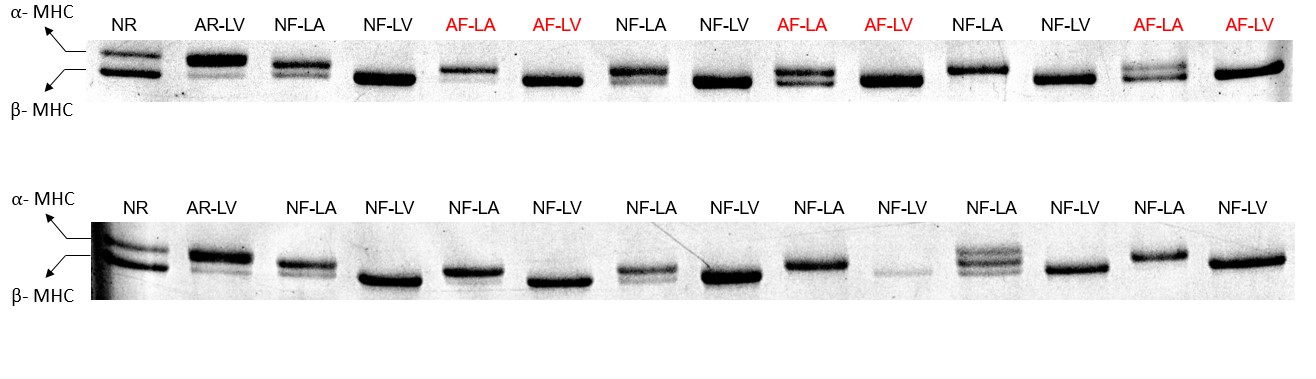


**Pro-Q / Sypro Stain**


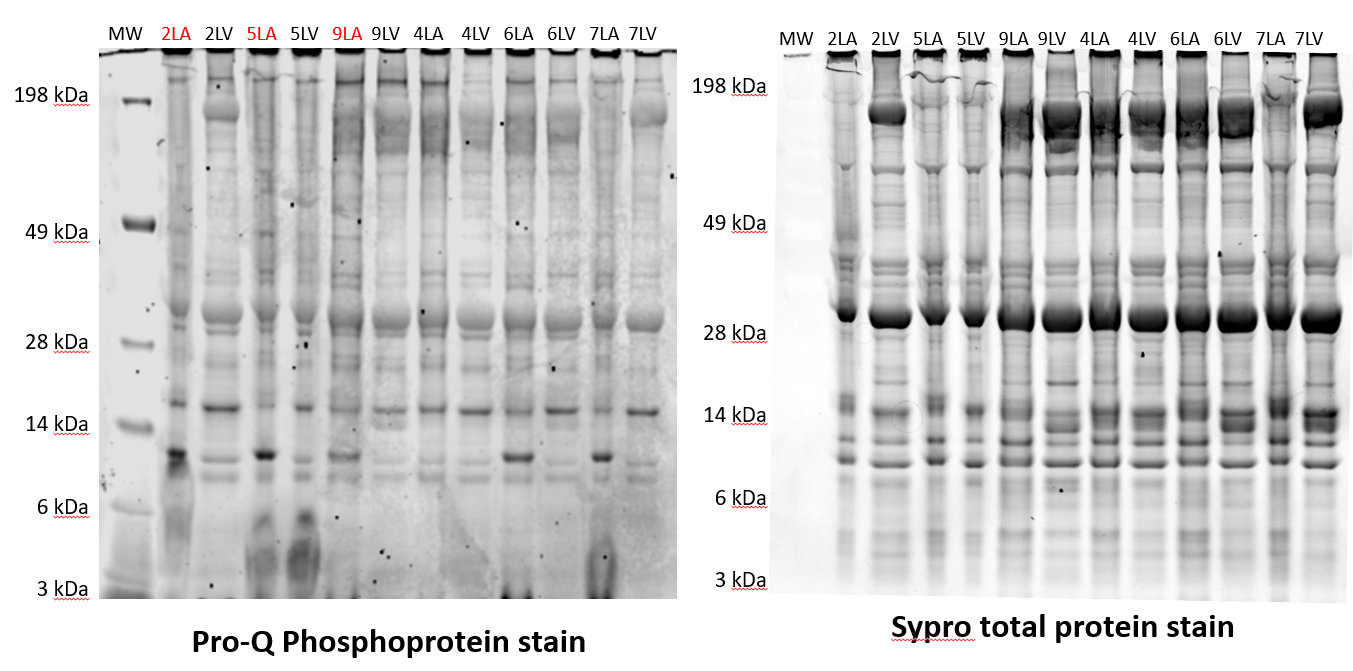


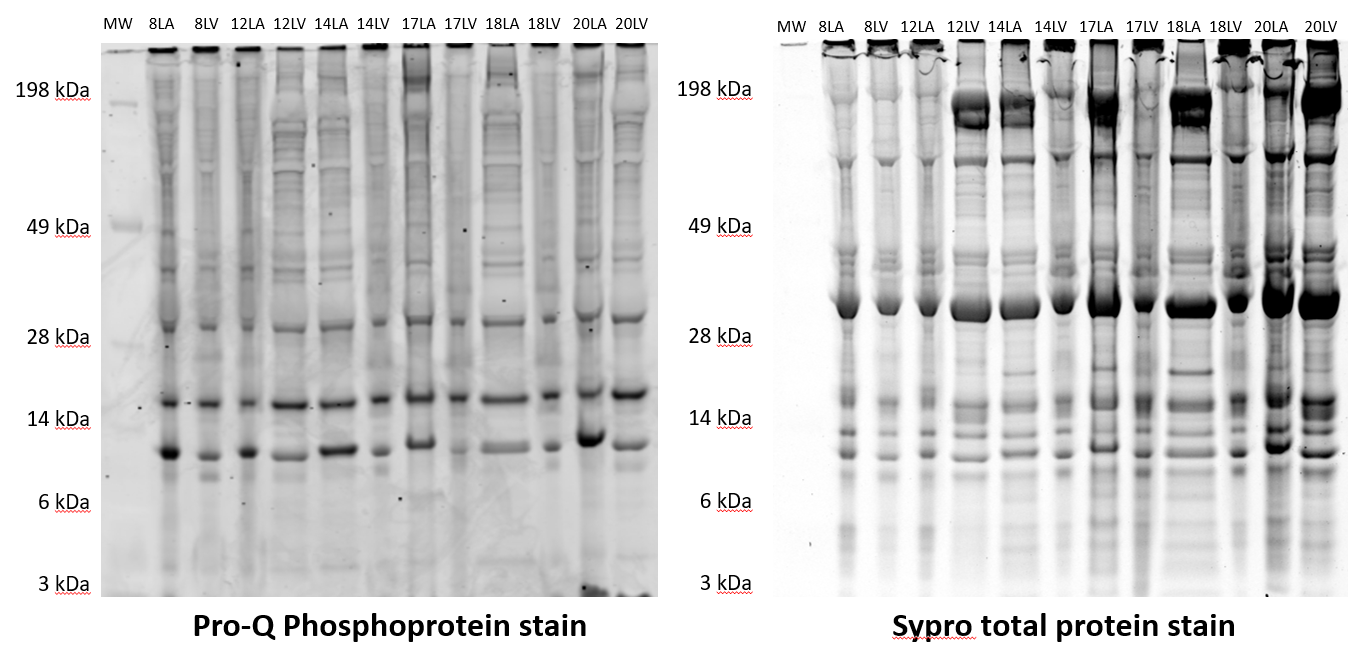


**MYBPC**


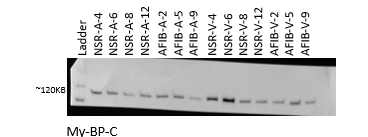


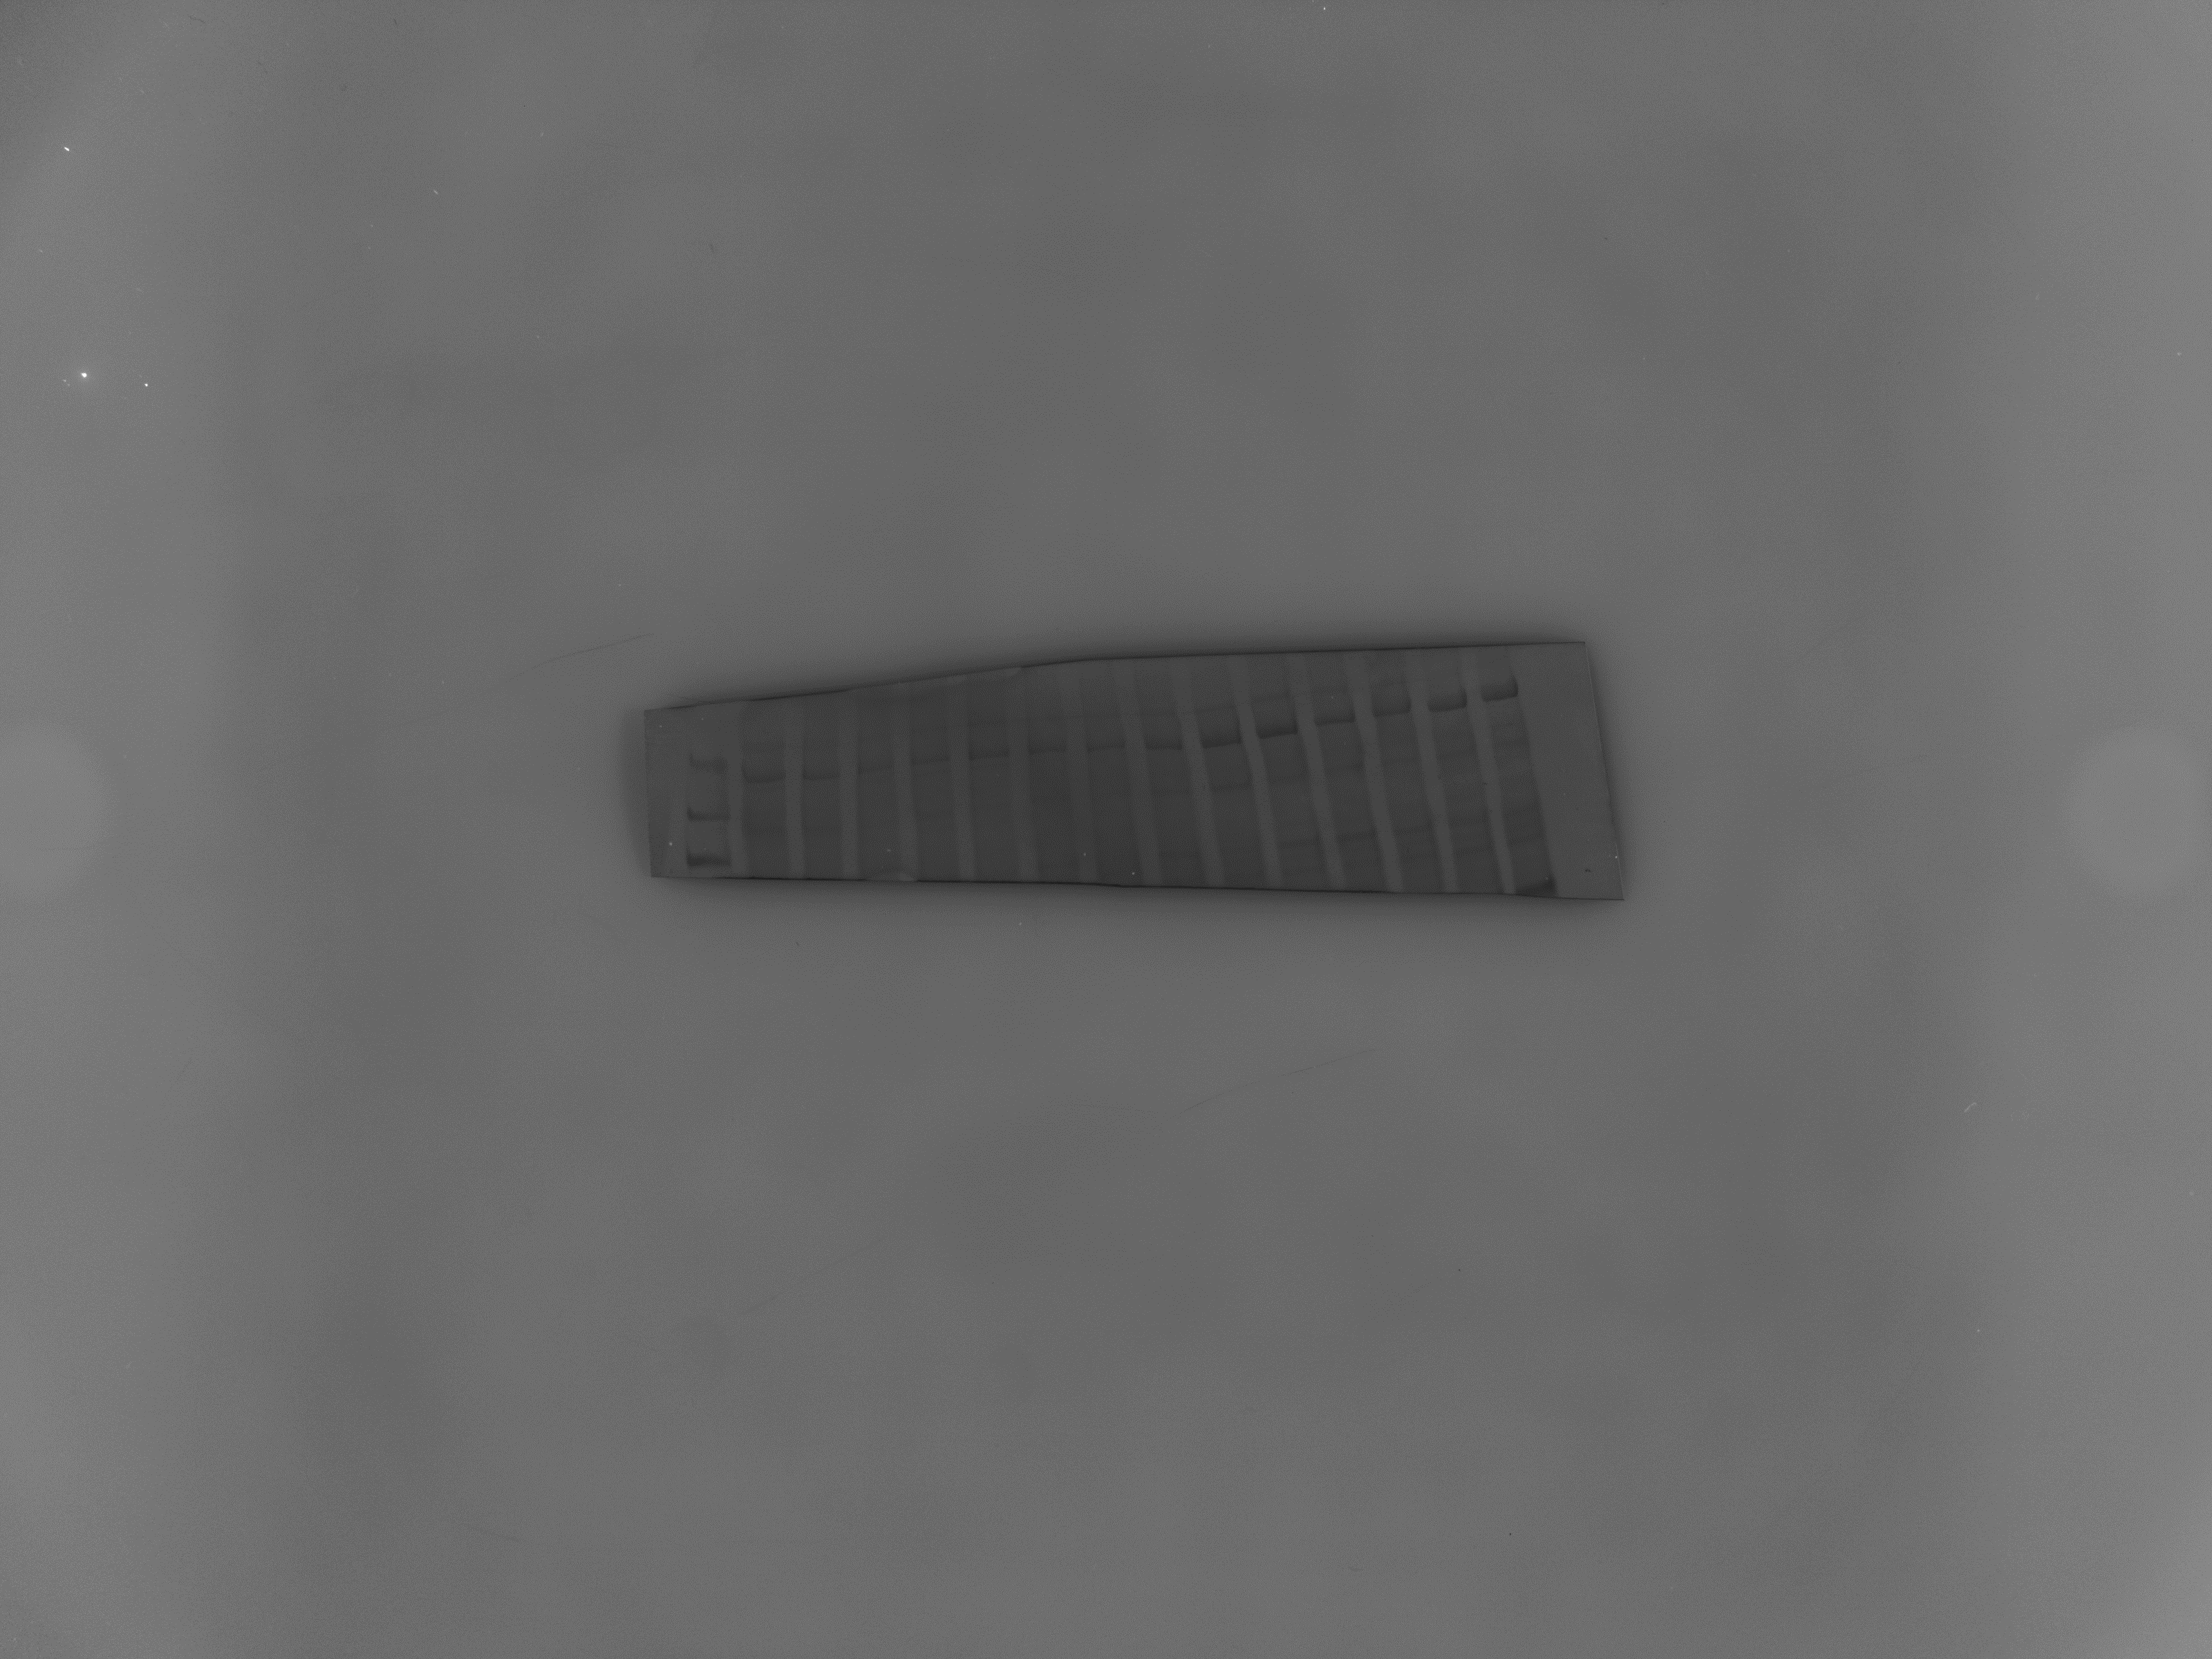


Blue stain

**BAG3 NSR / AF Blot**


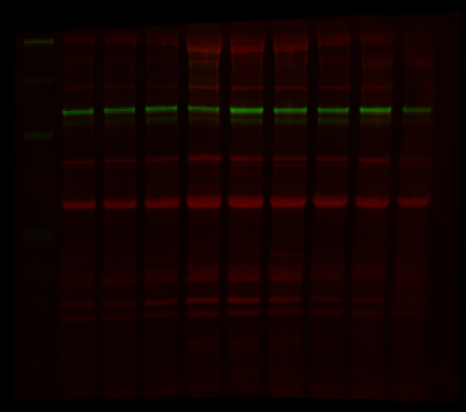


**BAG3 NSR NF / NSR HF**


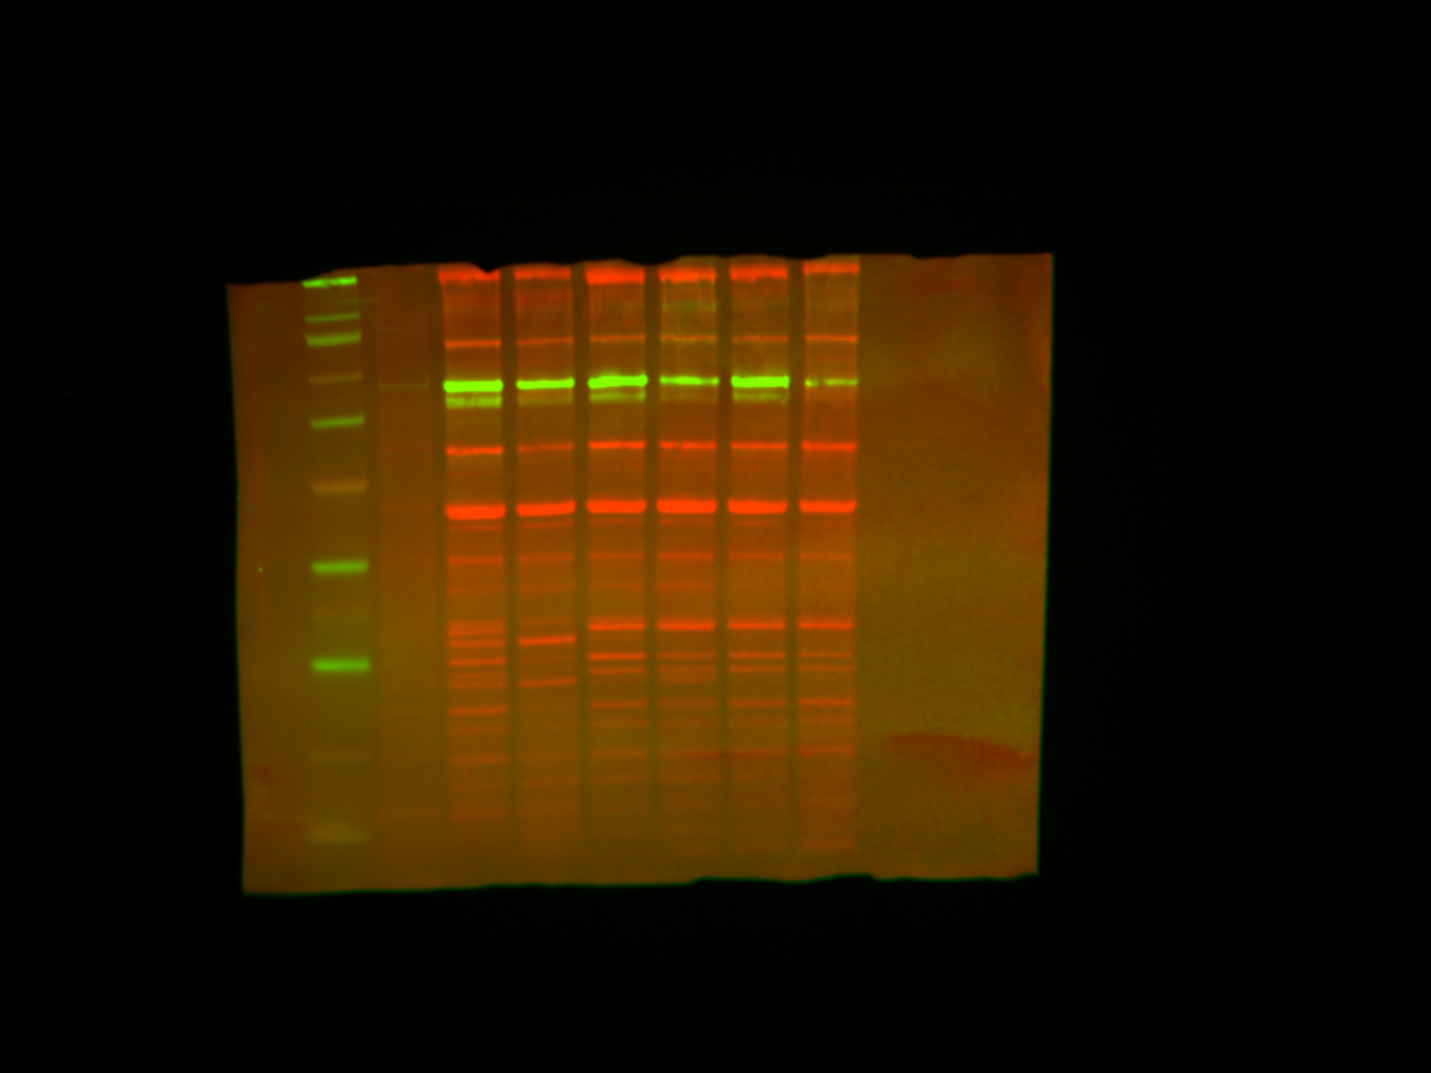


**Troponin I:**

FIG5A: Full, Uncropped Blot Shown in Figure
