# Supplementary material for: Atrial Fibrillation Induces Sarcomere Remodeling, Enhanced Sarcomere Contractility, and Loss of Atrial Identity
Source: Research Square preprint supplement (doi:10.21203/rs.3.rs-6422874/v1), 2025-04-23
Supplement: Supplementary file 5 [file f231b98ae8ce769a56f3320b.xlsx]

## Sheet: GoTermsBP_All
Category	Term	RT	Count	%	P-Value	Benjamini	-log10 p value
GOTERM_BP_DIRECT	complement activation, classical pathway	RT	33	4.6	4.1e-19	1.2e-15	18.3872
GOTERM_BP_DIRECT	positive regulation of B cell activation	RT	29	4.1	3.9e-18	4.8e-15	17.4089
GOTERM_BP_DIRECT	phagocytosis, recognition	RT	29	4.1	5.2e-18	4.8e-15	17.284
GOTERM_BP_DIRECT	phagocytosis, engulfment	RT	29	4.1	3.6e-16	2.5e-13	15.4437
GOTERM_BP_DIRECT	B cell receptor signaling pathway	RT	29	4.1	3.1e-14	1.7e-11	13.5086
GOTERM_BP_DIRECT	defense response to bacterium	RT	36	5	2.3e-12	1.1e-09	11.6383
GOTERM_BP_DIRECT	immunoglobulin mediated immune response	RT	20	2.8	1.2e-10	4.7e-08	9.92082
GOTERM_BP_DIRECT	telomere organization	RT	12	1.7	7.6e-10	2.6e-07	9.11919
GOTERM_BP_DIRECT	regulation of gene expression, epigenetic	RT	12	1.7	1.3e-08	4.1e-06	7.88606
GOTERM_BP_DIRECT	glutathione derivative biosynthetic process	RT	7	1	5e-08	1.4e-05	7.30103
GOTERM_BP_DIRECT	muscle contraction	RT	17	2.4	6.6e-08	1.7e-05	7.18046
GOTERM_BP_DIRECT	adaptive immune response	RT	44	6.1	9.3e-08	2.2e-05	7.03152
GOTERM_BP_DIRECT	protein folding	RT	23	3.2	6e-07	0.00013	6.22185
GOTERM_BP_DIRECT	substantia nigra development	RT	12	1.7	6.7e-07	0.00013	6.17393
GOTERM_BP_DIRECT	cellular response to heat	RT	12	1.7	1e-06	0.00019	6
GOTERM_BP_DIRECT	DNA replication-dependent nucleosome assembly	RT	10	1.4	1.1e-06	0.00019	5.95861
GOTERM_BP_DIRECT	actin filament organization	RT	20	2.8	2.2e-06	0.00035	5.65758
GOTERM_BP_DIRECT	muscle filament sliding	RT	7	1	1.1e-05	0.0017	4.95861
GOTERM_BP_DIRECT	innate immune response	RT	45	6.3	1.2e-05	0.0018	4.92082
GOTERM_BP_DIRECT	regulation of the force of heart contraction	RT	7	1	1.7e-05	0.0023	4.76955
GOTERM_BP_DIRECT	pyruvate metabolic process	RT	6	0.8	8.3e-05	0.011	4.08092
GOTERM_BP_DIRECT	negative regulation of endopeptidase activity	RT	10	1.4	0.00014	0.017	3.85387
GOTERM_BP_DIRECT	regulation of striated muscle contraction	RT	5	0.7	0.00017	0.02	3.76955
GOTERM_BP_DIRECT	nitrobenzene metabolic process	RT	4	0.6	0.00017	0.02	3.76955
GOTERM_BP_DIRECT	glycolytic process	RT	9	1.3	0.00018	0.02	3.74473
GOTERM_BP_DIRECT	immune response	RT	35	4.9	0.00019	0.02	3.72125
GOTERM_BP_DIRECT	nucleosome assembly	RT	16	2.2	0.0004	0.041	3.39794
GOTERM_BP_DIRECT	response to glycoside	RT	4	0.6	0.00041	0.041	3.38722
GOTERM_BP_DIRECT	mitochondrial ATP synthesis coupled proton transport	RT	10	1.4	0.00044	0.041	3.35655
GOTERM_BP_DIRECT	sarcomere organization	RT	8	1.1	0.00045	0.041	3.34679
GOTERM_BP_DIRECT	antibacterial humoral response	RT	10	1.4	0.00049	0.044	3.3098
GOTERM_BP_DIRECT	hydrogen ion transmembrane transport	RT	15	2.1	0.00051	0.044	3.29243
GOTERM_BP_DIRECT	retinol metabolic process	RT	9	1.3	0.00057	0.048	3.24413
GOTERM_BP_DIRECT	regulation of cytosolic calcium ion concentration	RT	8	1.1	0.00061	0.048	3.21467
GOTERM_BP_DIRECT	high-density lipoprotein particle assembly	RT	5	0.7	0.00061	0.048	3.21467
GOTERM_BP_DIRECT	translational initiation	RT	9	1.3	0.00065	0.05	3.18709
GOTERM_BP_DIRECT	cell communication by electrical coupling involved in cardiac conduction	RT	5	0.7	0.00085	0.064	3.07058
GOTERM_BP_DIRECT	proteolysis	RT	29	4.1	0.0011	0.08	2.95861
GOTERM_BP_DIRECT	relaxation of cardiac muscle	RT	5	0.7	0.0012	0.08	2.92082
GOTERM_BP_DIRECT	carbon dioxide transport	RT	5	0.7	0.0012	0.08	2.92082
GOTERM_BP_DIRECT	regulation of cardiac conduction	RT	6	0.8	0.0013	0.089	2.88606
GOTERM_BP_DIRECT	ventricular cardiac muscle tissue morphogenesis	RT	6	0.8	0.0016	0.11	2.79588
GOTERM_BP_DIRECT	osteoblast differentiation	RT	13	1.8	0.0018	0.12	2.74473
GOTERM_BP_DIRECT	gene expression	RT	13	1.8	0.0019	0.12	2.72125
GOTERM_BP_DIRECT	skeletal muscle contraction	RT	6	0.8	0.0019	0.12	2.72125
GOTERM_BP_DIRECT	oxygen transport	RT	5	0.7	0.002	0.12	2.69897
GOTERM_BP_DIRECT	lactate metabolic process	RT	4	0.6	0.0021	0.13	2.67778
GOTERM_BP_DIRECT	regulation of mitotic cell cycle	RT	9	1.3	0.0022	0.13	2.65758
GOTERM_BP_DIRECT	hydrogen peroxide catabolic process	RT	6	0.8	0.0023	0.13	2.63827
GOTERM_BP_DIRECT	complement activation, alternative pathway	RT	5	0.7	0.0025	0.14	2.60206
GOTERM_BP_DIRECT	protein stabilization	RT	18	2.5	0.003	0.16	2.52288
GOTERM_BP_DIRECT	negative regulation of heart contraction	RT	4	0.6	0.0031	0.16	2.50864
GOTERM_BP_DIRECT	ethanol oxidation	RT	4	0.6	0.0031	0.16	2.50864
GOTERM_BP_DIRECT	transition between fast and slow fiber	RT	4	0.6	0.0031	0.16	2.50864
GOTERM_BP_DIRECT	retina homeostasis	RT	7	1	0.0034	0.17	2.46852
GOTERM_BP_DIRECT	cytoskeleton organization	RT	14	2	0.0036	0.18	2.4437
GOTERM_BP_DIRECT	ATP biosynthetic process	RT	5	0.7	0.0039	0.19	2.40894
GOTERM_BP_DIRECT	glycogen metabolic process	RT	6	0.8	0.0043	0.2	2.36653
GOTERM_BP_DIRECT	membrane disruption in other organism	RT	4	0.6	0.0044	0.21	2.35655
GOTERM_BP_DIRECT	cellular response to calcium ion	RT	10	1.4	0.0045	0.21	2.34679
GOTERM_BP_DIRECT	regulation of ryanodine-sensitive calcium-release channel activity	RT	5	0.7	0.0047	0.22	2.3279
GOTERM_BP_DIRECT	blood coagulation	RT	10	1.4	0.0048	0.22	2.31876
GOTERM_BP_DIRECT	ATP metabolic process	RT	6	0.8	0.0056	0.25	2.25181
GOTERM_BP_DIRECT	response to organic cyclic compound	RT	8	1.1	0.006	0.26	2.22185
GOTERM_BP_DIRECT	extracellular matrix organization	RT	15	2.1	0.0064	0.27	2.19382
GOTERM_BP_DIRECT	glutathione metabolic process	RT	7	1	0.0066	0.27	2.18046
GOTERM_BP_DIRECT	mitochondrial translation	RT	10	1.4	0.0068	0.27	2.16749
GOTERM_BP_DIRECT	caveola assembly	RT	3	0.4	0.0071	0.27	2.14874
GOTERM_BP_DIRECT	purine ribonucleoside monophosphate biosynthetic process	RT	3	0.4	0.0071	0.27	2.14874
GOTERM_BP_DIRECT	aromatic compound catabolic process	RT	3	0.4	0.0071	0.27	2.14874
GOTERM_BP_DIRECT	sulfide oxidation, using sulfide:quinone oxidoreductase	RT	3	0.4	0.0071	0.27	2.14874
GOTERM_BP_DIRECT	mitochondrial respiratory chain complex I assembly	RT	8	1.1	0.0072	0.27	2.14267
GOTERM_BP_DIRECT	iron ion homeostasis	RT	6	0.8	0.0073	0.27	2.13668
GOTERM_BP_DIRECT	tricarboxylic acid cycle	RT	6	0.8	0.0073	0.27	2.13668
GOTERM_BP_DIRECT	regulation of blood coagulation	RT	4	0.6	0.0076	0.28	2.11919
GOTERM_BP_DIRECT	actin filament bundle assembly	RT	6	0.8	0.0092	0.33	2.03621
GOTERM_BP_DIRECT	triglyceride metabolic process	RT	6	0.8	0.0092	0.33	2.03621
GOTERM_BP_DIRECT	carboxylic acid metabolic process	RT	5	0.7	0.0093	0.33	2.03152
GOTERM_BP_DIRECT	tRNA aminoacylation for protein translation	RT	5	0.7	0.0093	0.33	2.03152
GOTERM_BP_DIRECT	antimicrobial humoral response	RT	4	0.6	0.0096	0.33	2.01773
GOTERM_BP_DIRECT	intermediate filament organization	RT	8	1.1	0.0099	0.34	2.00436
GOTERM_BP_DIRECT	chaperone-mediated protein folding	RT	6	0.8	0.012	0.38	1.92082
GOTERM_BP_DIRECT	complement activation	RT	5	0.7	0.012	0.4	1.92082
GOTERM_BP_DIRECT	zymogen activation	RT	5	0.7	0.012	0.4	1.92082
GOTERM_BP_DIRECT	regulation of muscle contraction	RT	4	0.6	0.012	0.39	1.92082
GOTERM_BP_DIRECT	cellular detoxification of nitrogen compound	RT	3	0.4	0.012	0.38	1.92082
GOTERM_BP_DIRECT	regulation of chaperone-mediated autophagy	RT	3	0.4	0.012	0.38	1.92082
GOTERM_BP_DIRECT	immunoglobulin production	RT	9	1.3	0.013	0.42	1.88606
GOTERM_BP_DIRECT	ATP synthesis coupled proton transport	RT	5	0.7	0.014	0.44	1.85387
GOTERM_BP_DIRECT	supramolecular fiber organization	RT	4	0.6	0.014	0.45	1.85387
GOTERM_BP_DIRECT	antimicrobial humoral immune response mediated by antimicrobial peptide	RT	10	1.4	0.015	0.45	1.82391
GOTERM_BP_DIRECT	killing of cells of other organism	RT	9	1.3	0.015	0.45	1.82391
GOTERM_BP_DIRECT	positive regulation of cell growth	RT	9	1.3	0.016	0.47	1.79588
GOTERM_BP_DIRECT	cardiac muscle contraction	RT	6	0.8	0.016	0.47	1.79588
GOTERM_BP_DIRECT	innate immune response in mucosa	RT	5	0.7	0.016	0.47	1.79588
GOTERM_BP_DIRECT	response to cold	RT	6	0.8	0.017	0.49	1.76955
GOTERM_BP_DIRECT	cellular response to steroid hormone stimulus	RT	4	0.6	0.017	0.49	1.76955
GOTERM_BP_DIRECT	microtubule polymerization	RT	4	0.6	0.017	0.49	1.76955
GOTERM_BP_DIRECT	response to xenobiotic stimulus	RT	17	2.4	0.018	0.5	1.74473
GOTERM_BP_DIRECT	ER to Golgi vesicle-mediated transport	RT	11	1.5	0.021	0.59	1.67778
GOTERM_BP_DIRECT	positive regulation of respiratory burst	RT	3	0.4	0.023	0.63	1.63827
GOTERM_BP_DIRECT	L-ascorbic acid metabolic process	RT	3	0.4	0.023	0.63	1.63827
GOTERM_BP_DIRECT	canonical glycolysis	RT	4	0.6	0.024	0.65	1.61979
GOTERM_BP_DIRECT	translation	RT	15	2.1	0.025	0.67	1.60206
GOTERM_BP_DIRECT	ion transmembrane transport	RT	11	1.5	0.025	0.65	1.60206
GOTERM_BP_DIRECT	cell adhesion	RT	30	4.2	0.027	0.7	1.56864
GOTERM_BP_DIRECT	regulation of heart contraction	RT	5	0.7	0.028	0.7	1.55284
GOTERM_BP_DIRECT	vesicle transport along actin filament	RT	4	0.6	0.028	0.7	1.55284
GOTERM_BP_DIRECT	negative regulation of catalytic activity	RT	4	0.6	0.028	0.7	1.55284
GOTERM_BP_DIRECT	glomerular filtration	RT	4	0.6	0.028	0.7	1.55284
GOTERM_BP_DIRECT	renal water homeostasis	RT	4	0.6	0.028	0.7	1.55284
GOTERM_BP_DIRECT	response to endoplasmic reticulum stress	RT	8	1.1	0.029	0.71	1.5376
GOTERM_BP_DIRECT	regulation of cardiac muscle cell action potential involved in regulation of contraction	RT	3	0.4	0.03	0.74	1.52288
GOTERM_BP_DIRECT	negative regulation of trophoblast cell migration	RT	3	0.4	0.03	0.74	1.52288
GOTERM_BP_DIRECT	cholesterol homeostasis	RT	9	1.3	0.031	0.74	1.50864
GOTERM_BP_DIRECT	response to peptide hormone	RT	6	0.8	0.031	0.74	1.50864
GOTERM_BP_DIRECT	protein kinase A signaling	RT	4	0.6	0.032	0.76	1.49485
GOTERM_BP_DIRECT	tissue development	RT	5	0.7	0.034	0.78	1.46852
GOTERM_BP_DIRECT	defense response to fungus	RT	5	0.7	0.034	0.78	1.46852
GOTERM_BP_DIRECT	regulation of endocytosis	RT	5	0.7	0.034	0.78	1.46852
GOTERM_BP_DIRECT	actin cytoskeleton organization	RT	13	1.8	0.036	0.83	1.4437
GOTERM_BP_DIRECT	macromolecular complex assembly	RT	11	1.5	0.037	0.84	1.4318
GOTERM_BP_DIRECT	positive regulation of stress fiber assembly	RT	6	0.8	0.038	0.84	1.42022
GOTERM_BP_DIRECT	substrate-dependent cell migration, cell extension	RT	3	0.4	0.038	0.84	1.42022
GOTERM_BP_DIRECT	GMP biosynthetic process	RT	3	0.4	0.038	0.84	1.42022
GOTERM_BP_DIRECT	dehydroascorbic acid transport	RT	3	0.4	0.038	0.84	1.42022
GOTERM_BP_DIRECT	hepoxilin biosynthetic process	RT	3	0.4	0.038	0.84	1.42022
GOTERM_BP_DIRECT	xenobiotic catabolic process	RT	4	0.6	0.041	0.88	1.38722
GOTERM_BP_DIRECT	chaperone-mediated protein complex assembly	RT	4	0.6	0.041	0.88	1.38722
GOTERM_BP_DIRECT	proteasomal protein catabolic process	RT	5	0.7	0.044	0.94	1.35655
GOTERM_BP_DIRECT	cellular oxidant detoxification	RT	7	1	0.046	0.94	1.33724
GOTERM_BP_DIRECT	regulation of cardiac muscle contraction by regulation of the release of sequestered calcium ion	RT	4	0.6	0.046	0.94	1.33724
GOTERM_BP_DIRECT	glycogen catabolic process	RT	3	0.4	0.046	0.94	1.33724
GOTERM_BP_DIRECT	positive regulation of lipoprotein lipase activity	RT	3	0.4	0.046	0.94	1.33724
GOTERM_BP_DIRECT	embryonic eye morphogenesis	RT	3	0.4	0.046	0.94	1.33724
GOTERM_BP_DIRECT	monocarboxylic acid metabolic process	RT	3	0.4	0.046	0.94	1.33724
GOTERM_BP_DIRECT	negative regulation of cysteine-type endopeptidase activity	RT	3	0.4	0.046	0.94	1.33724
GOTERM_BP_DIRECT	defense response to Gram-negative bacterium	RT	8	1.1	0.048	0.97	1.31876
GOTERM_BP_DIRECT	regulation of glucose metabolic process	RT	4	0.6	0.051	1	1.29243
GOTERM_BP_DIRECT	axonal transport of mitochondrion	RT	3	0.4	0.055	1	1.25964
GOTERM_BP_DIRECT	CRD-mediated mRNA stabilization	RT	3	0.4	0.055	1	1.25964
GOTERM_BP_DIRECT	protein folding in endoplasmic reticulum	RT	3	0.4	0.055	1	1.25964
GOTERM_BP_DIRECT	establishment or maintenance of transmembrane electrochemical gradient	RT	3	0.4	0.055	1	1.25964
GOTERM_BP_DIRECT	fructose 6-phosphate metabolic process	RT	3	0.4	0.055	1	1.25964
GOTERM_BP_DIRECT	negative regulation of endothelial cell migration	RT	4	0.6	0.057	1	1.24413
GOTERM_BP_DIRECT	glucose transmembrane transport	RT	4	0.6	0.057	1	1.24413
GOTERM_BP_DIRECT	lipid catabolic process	RT	8	1.1	0.058	1	1.23657
GOTERM_BP_DIRECT	stress granule assembly	RT	4	0.6	0.062	1	1.20761
GOTERM_BP_DIRECT	detection of bacterium	RT	3	0.4	0.065	1	1.18709
GOTERM_BP_DIRECT	negative regulation of platelet aggregation	RT	3	0.4	0.065	1	1.18709
GOTERM_BP_DIRECT	negative regulation of calcium ion transport	RT	3	0.4	0.065	1	1.18709
GOTERM_BP_DIRECT	regulation of complement activation	RT	3	0.4	0.065	1	1.18709
GOTERM_BP_DIRECT	cellular response to epinephrine stimulus	RT	3	0.4	0.065	1	1.18709
GOTERM_BP_DIRECT	elastic fiber assembly	RT	3	0.4	0.065	1	1.18709
GOTERM_BP_DIRECT	regulation of RNA splicing	RT	7	1	0.066	1	1.18046
GOTERM_BP_DIRECT	regulation of mRNA stability	RT	6	0.8	0.067	1	1.17393
GOTERM_BP_DIRECT	muscle cell cellular homeostasis	RT	4	0.6	0.068	1	1.16749
GOTERM_BP_DIRECT	calcium ion transport from cytosol to endoplasmic reticulum	RT	2	0.3	0.069	1	1.16115
GOTERM_BP_DIRECT	negative regulation of biosynthetic process	RT	2	0.3	0.069	1	1.16115
GOTERM_BP_DIRECT	carboxylic acid catabolic process	RT	2	0.3	0.069	1	1.16115
GOTERM_BP_DIRECT	negative regulation of chromosome condensation	RT	2	0.3	0.069	1	1.16115
GOTERM_BP_DIRECT	rRNA metabolic process	RT	2	0.3	0.069	1	1.16115
GOTERM_BP_DIRECT	aging	RT	10	1.4	0.072	1	1.14267
GOTERM_BP_DIRECT	positive regulation of substrate adhesion-dependent cell spreading	RT	5	0.7	0.073	1	1.13668
GOTERM_BP_DIRECT	protein targeting	RT	5	0.7	0.073	1	1.13668
GOTERM_BP_DIRECT	glucose metabolic process	RT	6	0.8	0.075	1	1.12494
GOTERM_BP_DIRECT	clathrin-dependent endocytosis	RT	4	0.6	0.075	1	1.12494
GOTERM_BP_DIRECT	cholesterol efflux	RT	4	0.6	0.075	1	1.12494
GOTERM_BP_DIRECT	telomeric heterochromatin assembly	RT	3	0.4	0.075	1	1.12494
GOTERM_BP_DIRECT	negative regulation of substrate adhesion-dependent cell spreading	RT	3	0.4	0.075	1	1.12494
GOTERM_BP_DIRECT	removal of superoxide radicals	RT	3	0.4	0.075	1	1.12494
GOTERM_BP_DIRECT	cellular response to electrical stimulus	RT	3	0.4	0.075	1	1.12494
GOTERM_BP_DIRECT	negative regulation of fibrinolysis	RT	3	0.4	0.075	1	1.12494
GOTERM_BP_DIRECT	phospholipid efflux	RT	3	0.4	0.075	1	1.12494
GOTERM_BP_DIRECT	negative regulation of nitric-oxide synthase activity	RT	3	0.4	0.075	1	1.12494
GOTERM_BP_DIRECT	cellular response to organic cyclic compound	RT	5	0.7	0.078	1	1.10791
GOTERM_BP_DIRECT	mRNA transport	RT	7	1	0.083	1	1.08092
GOTERM_BP_DIRECT	lipid metabolic process	RT	13	1.8	0.085	1	1.07058
GOTERM_BP_DIRECT	negative regulation of blood coagulation	RT	3	0.4	0.085	1	1.07058
GOTERM_BP_DIRECT	glucose import	RT	3	0.4	0.085	1	1.07058
GOTERM_BP_DIRECT	regulation of cholesterol metabolic process	RT	3	0.4	0.085	1	1.07058
GOTERM_BP_DIRECT	positive regulation of lipid storage	RT	3	0.4	0.085	1	1.07058
GOTERM_BP_DIRECT	regulation of translation	RT	7	1	0.087	1	1.06048
GOTERM_BP_DIRECT	defense response to Gram-positive bacterium	RT	9	1.3	0.089	1	1.05061
GOTERM_BP_DIRECT	carbohydrate metabolic process	RT	11	1.5	0.092	1	1.03621
GOTERM_BP_DIRECT	aerobic respiration	RT	6	0.8	0.092	1	1.03621
GOTERM_BP_DIRECT	response to glucose	RT	6	0.8	0.092	1	1.03621
GOTERM_BP_DIRECT	negative regulation of translation	RT	7	1	0.095	1	1.02228
GOTERM_BP_DIRECT	calcium ion transport	RT	7	1	0.095	1	1.02228
GOTERM_BP_DIRECT	response to organic substance	RT	4	0.6	0.095	1	1.02228
GOTERM_BP_DIRECT	long-chain fatty acid metabolic process	RT	4	0.6	0.095	1	1.02228
GOTERM_BP_DIRECT	sodium ion export from cell	RT	3	0.4	0.096	1	1.01773
GOTERM_BP_DIRECT	cellular potassium ion homeostasis	RT	3	0.4	0.096	1	1.01773
GOTERM_BP_DIRECT	positive regulation of ATP biosynthetic process	RT	3	0.4	0.096	1	1.01773
GOTERM_BP_DIRECT	keratinization	RT	7	1	0.098	1	1.00877

## Sheet: GoTermsMF_Significant
Category	Term	RT	Count	%	P-Value	Benjamini	-log10(P value)
GOTERM_MF_DIRECT	antigen binding	RT	24	5.7	4.1e-14	2.7e-11	13.3872
GOTERM_MF_DIRECT	heparin binding	RT	19	4.5	6.9e-08	2.3e-05	7.16115
GOTERM_MF_DIRECT	extracellular matrix structural constituent	RT	15	3.6	2.6e-07	5.7e-05	6.58503
GOTERM_MF_DIRECT	calcium ion binding	RT	34	8.1	8.6e-05	0.013	4.0655
GOTERM_MF_DIRECT	lipase inhibitor activity	RT	4	1	9.7e-05	0.013	4.01323
GOTERM_MF_DIRECT	phospholipid binding	RT	11	2.6	0.00047	0.051	3.3279
GOTERM_MF_DIRECT	protein binding	RT	306	72.9	0.00056	0.052	3.25181
GOTERM_MF_DIRECT	identical protein binding	RT	58	13.8	0.00092	0.075	3.03621
GOTERM_MF_DIRECT	extracellular matrix constituent conferring elasticity	RT	4	1	0.0011	0.078	2.95861
GOTERM_MF_DIRECT	monosaccharide binding	RT	4	1	0.0015	0.095	2.82391
GOTERM_MF_DIRECT	structural constituent of muscle	RT	6	1.4	0.002	0.12	2.69897
GOTERM_MF_DIRECT	serine-type endopeptidase activity	RT	12	2.9	0.0026	0.14	2.58503
GOTERM_MF_DIRECT	RNA binding	RT	49	11.7	0.0029	0.14	2.5376
GOTERM_MF_DIRECT	AMP binding	RT	4	1	0.0038	0.18	2.42022
GOTERM_MF_DIRECT	metallopeptidase activity	RT	7	1.7	0.0046	0.2	2.33724
GOTERM_MF_DIRECT	peptide binding	RT	6	1.4	0.0056	0.23	2.25181
GOTERM_MF_DIRECT	disordered domain specific binding	RT	5	1.2	0.006	0.23	2.22185
GOTERM_MF_DIRECT	arylesterase activity	RT	3	0.7	0.0066	0.23	2.18046
GOTERM_MF_DIRECT	phosphatidylcholine-sterol O-acyltransferase activator activity	RT	3	0.7	0.0066	0.23	2.18046
GOTERM_MF_DIRECT	integrin binding	RT	10	2.4	0.0072	0.23	2.14267
GOTERM_MF_DIRECT	proton-transporting ATP synthase activity, rotational mechanism	RT	4	1	0.0075	0.23	2.12494
GOTERM_MF_DIRECT	calcium-dependent protein binding	RT	7	1.7	0.0086	0.25	2.0655
GOTERM_MF_DIRECT	antioxidant activity	RT	4	1	0.0087	0.25	2.06048
GOTERM_MF_DIRECT	serine-type peptidase activity	RT	6	1.4	0.0095	0.26	2.02228
GOTERM_MF_DIRECT	low-density lipoprotein particle receptor binding	RT	4	1	0.014	0.38	1.85387
GOTERM_MF_DIRECT	endopeptidase inhibitor activity	RT	5	1.2	0.016	0.39	1.79588
GOTERM_MF_DIRECT	extracellular matrix structural constituent conferring tensile strength	RT	5	1.2	0.016	0.39	1.79588
GOTERM_MF_DIRECT	glutathione binding	RT	3	0.7	0.019	0.42	1.72125
GOTERM_MF_DIRECT	RAGE receptor binding	RT	3	0.7	0.019	0.42	1.72125
GOTERM_MF_DIRECT	endopeptidase activity	RT	6	1.4	0.021	0.45	1.67778
GOTERM_MF_DIRECT	lipid transporter activity	RT	4	1	0.022	0.46	1.65758
GOTERM_MF_DIRECT	extracellular matrix binding	RT	4	1	0.024	0.49	1.61979
GOTERM_MF_DIRECT	phosphatidylcholine binding	RT	4	1	0.026	0.51	1.58503
GOTERM_MF_DIRECT	oligosaccharide binding	RT	3	0.7	0.027	0.51	1.56864
GOTERM_MF_DIRECT	serine-type endopeptidase inhibitor activity	RT	7	1.7	0.03	0.56	1.52288
GOTERM_MF_DIRECT	NADP-retinol dehydrogenase activity	RT	3	0.7	0.031	0.56	1.50864
GOTERM_MF_DIRECT	fatty acid binding	RT	4	1	0.034	0.6	1.46852
GOTERM_MF_DIRECT	copper ion binding	RT	5	1.2	0.039	0.63	1.40894
GOTERM_MF_DIRECT	immunoglobulin receptor binding	RT	3	0.7	0.041	0.63	1.38722
GOTERM_MF_DIRECT	electron carrier activity	RT	5	1.2	0.041	0.63	1.38722
GOTERM_MF_DIRECT	glycerol dehydrogenase [NADP+] activity	RT	2	0.5	0.043	0.63	1.36653
GOTERM_MF_DIRECT	cyanamide hydratase activity	RT	2	0.5	0.043	0.63	1.36653
GOTERM_MF_DIRECT	hormone-sensitive lipase activity	RT	2	0.5	0.043	0.63	1.36653
GOTERM_MF_DIRECT	L-glucuronate reductase activity	RT	2	0.5	0.043	0.63	1.36653
GOTERM_MF_DIRECT	oxidoreductase activity	RT	10	2.4	0.043	0.63	1.36653
GOTERM_MF_DIRECT	extracellular matrix structural constituent conferring compression resistance	RT	3	0.7	0.046	0.64	1.33724
GOTERM_MF_DIRECT	metalloendopeptidase inhibitor activity	RT	3	0.7	0.046	0.64	1.33724
